# Supplementary material
Source: ML conference proceedings conference paper supplement (https://proceedings.neurips.cc/paper_files/paper/2022/hash/10a6bdcabbd5a3d36b760daa295f63c1-Abstract.html)
Supplement: Supplementary file 1 [file 10a6bdcabbd5a3d36b760daa295f63c1-Supplemental-Conference.zip]

Archive with 115 entries (109 files):
- neurips2022/
- __MACOSX/._neurips2022
- neurips2022/.DS_Store
- __MACOSX/neurips2022/._.DS_Store
- neurips2022/code/
- neurips2022/appendix.pdf
- __MACOSX/neurips2022/._appendix.pdf
- neurips2022/code/robotics_getting_faster.gif
- __MACOSX/neurips2022/code/._robotics_getting_faster.gif
- neurips2022/code/.DS_Store
- __MACOSX/neurips2022/code/._.DS_Store
- neurips2022/code/robotics_skills.gif
- __MACOSX/neurips2022/code/._robotics_skills.gif
- neurips2022/code/README.MD
- __MACOSX/neurips2022/code/._README.MD
- neurips2022/code/robotics_code/
- __MACOSX/neurips2022/code/._robotics_code
- neurips2022/code/montezuma_skill_29_Figure6.gif
- __MACOSX/neurips2022/code/._montezuma_skill_29_Figure6.gif
- neurips2022/code/robotics_one_leg.gif
- __MACOSX/neurips2022/code/._robotics_one_leg.gif
- neurips2022/code/montezuma_exploring_other_rooms.gif
- __MACOSX/neurips2022/code/._montezuma_exploring_other_rooms.gif
- neurips2022/code/2d_maze_code/
- __MACOSX/neurips2022/code/._2d_maze_code
- neurips2022/code/montezuma_code/
- __MACOSX/neurips2022/code/._montezuma_code
- neurips2022/code/robotics_code/brax_hp_search.py
- __MACOSX/neurips2022/code/robotics_code/._brax_hp_search.py
- neurips2022/code/robotics_code/configs.py
- __MACOSX/neurips2022/code/robotics_code/._configs.py
- neurips2022/code/robotics_code/sample_generator.py
- __MACOSX/neurips2022/code/robotics_code/._sample_generator.py
- neurips2022/code/robotics_code/hp_searches/
- __MACOSX/neurips2022/code/robotics_code/._hp_searches
- neurips2022/code/robotics_code/exploration.py
- __MACOSX/neurips2022/code/robotics_code/._exploration.py
- neurips2022/code/robotics_code/reward_network.py
- __MACOSX/neurips2022/code/robotics_code/._reward_network.py
- neurips2022/code/robotics_code/plotting.py
- __MACOSX/neurips2022/code/robotics_code/._plotting.py
- neurips2022/code/robotics_code/particle_based_MI.py
- __MACOSX/neurips2022/code/robotics_code/._particle_based_MI.py
- neurips2022/code/robotics_code/our_networks.py
- __MACOSX/neurips2022/code/robotics_code/._our_networks.py
- neurips2022/code/robotics_code/our_normalization.py
- __MACOSX/neurips2022/code/robotics_code/._our_normalization.py
- neurips2022/code/robotics_code/our_env.py
- __MACOSX/neurips2022/code/robotics_code/._our_env.py
- neurips2022/code/robotics_code/our_ppo.py
- __MACOSX/neurips2022/code/robotics_code/._our_ppo.py
- neurips2022/code/robotics_code/run_experiment.py
- __MACOSX/neurips2022/code/robotics_code/._run_experiment.py
- neurips2022/code/robotics_code/main.py
- __MACOSX/neurips2022/code/robotics_code/._main.py
- neurips2022/code/2d_maze_code/config.py
- __MACOSX/neurips2022/code/2d_maze_code/._config.py
- neurips2022/code/2d_maze_code/RL.py
- __MACOSX/neurips2022/code/2d_maze_code/._RL.py
- neurips2022/code/2d_maze_code/graph.py
- __MACOSX/neurips2022/code/2d_maze_code/._graph.py
- neurips2022/code/2d_maze_code/utils.py
- __MACOSX/neurips2022/code/2d_maze_code/._utils.py
- neurips2022/code/2d_maze_code/environment.py
- __MACOSX/neurips2022/code/2d_maze_code/._environment.py
- neurips2022/code/2d_maze_code/supervised.py
- __MACOSX/neurips2022/code/2d_maze_code/._supervised.py
- neurips2022/code/2d_maze_code/main.py
- __MACOSX/neurips2022/code/2d_maze_code/._main.py
- neurips2022/code/montezuma_code/our_policy_objective.py
- __MACOSX/neurips2022/code/montezuma_code/._our_policy_objective.py
- neurips2022/code/montezuma_code/graph.py
- __MACOSX/neurips2022/code/montezuma_code/._graph.py
- neurips2022/code/montezuma_code/our_entropy.py
- __MACOSX/neurips2022/code/montezuma_code/._our_entropy.py
- neurips2022/code/montezuma_code/our_ppo_clip.py
- __MACOSX/neurips2022/code/montezuma_code/._our_ppo_clip.py
- neurips2022/code/montezuma_code/utils.py
- __MACOSX/neurips2022/code/montezuma_code/._utils.py
- neurips2022/code/montezuma_code/main.py
- __MACOSX/neurips2022/code/montezuma_code/._main.py
- neurips2022/code/robotics_code/hp_searches/halfcheetah_100K.log
- __MACOSX/neurips2022/code/robotics_code/hp_searches/._halfcheetah_100K.log
- neurips2022/code/robotics_code/hp_searches/ant_1,25M.log
- __MACOSX/neurips2022/code/robotics_code/hp_searches/._ant_1,25M.log
- neurips2022/code/robotics_code/hp_searches/halfcheetah_150K_less.log
- __MACOSX/neurips2022/code/robotics_code/hp_searches/._halfcheetah_150K_less.log
- neurips2022/code/robotics_code/hp_searches/humanoid_25M.log
- __MACOSX/neurips2022/code/robotics_code/hp_searches/._humanoid_25M.log
- neurips2022/code/robotics_code/hp_searches/ant_2,5M.log
- __MACOSX/neurips2022/code/robotics_code/hp_searches/._ant_2,5M.log
- neurips2022/code/robotics_code/hp_searches/humanoid_30M.log
- __MACOSX/neurips2022/code/robotics_code/hp_searches/._humanoid_30M.log
- neurips2022/code/robotics_code/hp_searches/ant_20M.log
- __MACOSX/neurips2022/code/robotics_code/hp_searches/._ant_20M.log
- neurips2022/code/robotics_code/hp_searches/ant_5M.log
- __MACOSX/neurips2022/code/robotics_code/hp_searches/._ant_5M.log
- neurips2022/code/robotics_code/hp_searches/humanoid_10M.log
- __MACOSX/neurips2022/code/robotics_code/hp_searches/._humanoid_10M.log
- neurips2022/code/robotics_code/hp_searches/halfcheetah_300K_less.log
- __MACOSX/neurips2022/code/robotics_code/hp_searches/._halfcheetah_300K_less.log
- neurips2022/code/robotics_code/hp_searches/halfcheetah_5M.log
- __MACOSX/neurips2022/code/robotics_code/hp_searches/._halfcheetah_5M.log
- neurips2022/code/robotics_code/hp_searches/halfcheetah_1,25M.log
- __MACOSX/neurips2022/code/robotics_code/hp_searches/._halfcheetah_1,25M.log
- neurips2022/code/robotics_code/hp_searches/ant_10M.log
- __MACOSX/neurips2022/code/robotics_code/hp_searches/._ant_10M.log
- neurips2022/code/robotics_code/hp_searches/humanoid_standup_20M.log
- __MACOSX/neurips2022/code/robotics_code/hp_searches/._humanoid_standup_20M.log
- neurips2022/code/robotics_code/hp_searches/halfcheetah_0,625M_less.log
- __MACOSX/neurips2022/code/robotics_code/hp_searches/._halfcheetah_0,625M_less.log
- neurips2022/code/robotics_code/hp_searches/humanoid_20M.log
- __MACOSX/neurips2022/code/robotics_code/hp_searches/._humanoid_20M.log
- neurips2022/code/robotics_code/hp_searches/halfcheetah_0,625M.log
- __MACOSX/neurips2022/code/robotics_code/hp_searches/._halfcheetah_0,625M.log
