# Supplementary material
Source: ML conference proceedings conference paper supplement (https://proceedings.neurips.cc/paper_files/paper/2022/hash/10a6bdcabbd5a3d36b760daa295f63c1-Abstract.html)
Supplement: Supplementary file 1 [file 10a6bdcabbd5a3d36b760daa295f63c1-Supplemental-Conference.zip › neurips2022/code/2d_maze_code/config.py]

import sys

class Configuration(object):    
    entropy = 0.005
    extra_entropy = 0.05 #0.035
    clip_reward = True
    clip_reward_below_only = False
    binarize_reward = False
    use_guide = True
    reset_policy = False
    reset_value = False
    reset_pi_head= True
    load_reward = False
    

    epoch_len = 5000 * 4 * 3
    policy_lr = 0.0001

    batch_size = 256 * 8
