# Supplementary material
Source: ML conference proceedings conference paper supplement (https://proceedings.neurips.cc/paper_files/paper/2022/hash/10a6bdcabbd5a3d36b760daa295f63c1-Abstract.html)
Supplement: Supplementary file 1 [file 10a6bdcabbd5a3d36b760daa295f63c1-Supplemental-Conference.zip › neurips2022/code/2d_maze_code/utils.py]

import numpy as np
import matplotlib.pyplot as plt
import jax.numpy as jnp
import jax
from functools import partial

@jax.jit
def update_heatmap(old_heatmap, s):
    assert old_heatmap.shape[0] == old_heatmap.shape[1]
    
    size = old_heatmap.shape[0]
    s_1d = s[:, 1] + size * s[:, 0]
    s_1d = jax.nn.one_hot(s_1d, size * size, dtype=jnp.float32)
    
    cur_heatmap = jnp.sum(s_1d, axis=0)
    cur_heatmap = jnp.reshape(cur_heatmap, old_heatmap.shape)
    
    return old_heatmap + cur_heatmap

@jax.jit
def random_s_reset(s, p, key):
    reset = jax.random.bernoulli(key, p, [s.shape[0], 1])
    s_new = reset * s +  (1 - reset) * (s * 0 + 1)
    
    return s_new


def visualize_R(R_f, R_params):
    inp = np.zeros([32 * 32, 2])
    for i in range(32):
        for j in range(32):
            inp[i + 32*j, 0] = i  
            inp[i + 32*j, 1] = j
    cur_r_ = R_f(R_params, inp)[:, 0]
    cur_r = np.zeros([32, 32])
    for i in range(32):
        for j in range(32):
            cur_r[i, j] = cur_r_[i + 32*j]  
    
    return cur_r
