# Supplementary material
Source: ML conference proceedings conference paper supplement (https://proceedings.neurips.cc/paper_files/paper/2022/hash/10a6bdcabbd5a3d36b760daa295f63c1-Abstract.html)
Supplement: Supplementary file 1 [file 10a6bdcabbd5a3d36b760daa295f63c1-Supplemental-Conference.zip › neurips2022/code/robotics_code/hp_searches/ant_1,25M.log]

[32m[I 2022-01-12 22:29:44	940] [0m A new study created in memory with name: no-name-c8bb29cb-06c6-4b99-9d32-a5ac6b16e150 [0m
[32m[I 2022-01-12 22:31:27	452] [0m Trial 0 finished with value: 90.8761978149414 and parameters: {'r_scaling': 0.07067829308487811	'unroll': 5	'update_epoch': 13	'discount': 0.9278785008895132	'lr': 0.0006530167059236209	'entropy': 0.07654008825731723}. Best is trial 0 with value: 90.8761978149414. [0m
[32m[I 2022-01-12 22:33:10	934] [0m Trial 1 finished with value: 99.95821380615234 and parameters: {'r_scaling': 2.757181297895501	'unroll': 13	'update_epoch': 8	'discount': 0.9145139459763416	'lr': 0.0005165078744865314	'entropy': 0.007762377196739095}. Best is trial 0 with value: 90.8761978149414. [0m
[32m[I 2022-01-12 22:34:44	345] [0m Trial 2 finished with value: 98.02601623535156 and parameters: {'r_scaling': 5.053094922832778	'unroll': 13	'update_epoch': 12	'discount': 0.9650306645743888	'lr': 0.00018837584680417437	'entropy': 0.00019442489977573575}. Best is trial 0 with value: 90.8761978149414. [0m
[32m[I 2022-01-12 22:36:28	147] [0m Trial 3 finished with value: 94.90423583984375 and parameters: {'r_scaling': 0.20045205951552234	'unroll': 6	'update_epoch': 5	'discount': 0.9352448587141452	'lr': 0.0009765896376450992	'entropy': 0.0009594188237845317}. Best is trial 0 with value: 90.8761978149414. [0m
[32m[I 2022-01-12 22:38:15	935] [0m Trial 4 finished with value: 97.80010223388672 and parameters: {'r_scaling': 138.40174320018383	'unroll': 3	'update_epoch': 7	'discount': 0.9433491663260245	'lr': 0.0012450744769096197	'entropy': 0.0036112527133899445}. Best is trial 0 with value: 90.8761978149414. [0m
[32m[I 2022-01-12 22:39:51	113] [0m Trial 5 finished with value: 96.36323547363281 and parameters: {'r_scaling': 30.839405166317654	'unroll': 6	'update_epoch': 12	'discount': 0.9270420817853703	'lr': 0.0009937756907691122	'entropy': 0.0004514879156402399}. Best is trial 0 with value: 90.8761978149414. [0m
[32m[I 2022-01-12 22:41:39	213] [0m Trial 6 finished with value: 107.87504577636719 and parameters: {'r_scaling': 34.90050447885767	'unroll': 1	'update_epoch': 11	'discount': 0.9402180663921272	'lr': 0.0007680998970664588	'entropy': 0.0001707449058620294}. Best is trial 0 with value: 90.8761978149414. [0m
[32m[I 2022-01-12 22:43:46	366] [0m Trial 7 finished with value: 97.07465362548828 and parameters: {'r_scaling': 18.75747191086122	'unroll': 8	'update_epoch': 3	'discount': 0.9715007832176875	'lr': 0.00010623554836894166	'entropy': 0.0015190981941544958}. Best is trial 0 with value: 90.8761978149414. [0m
[32m[I 2022-01-12 22:45:20	033] [0m Trial 8 finished with value: 96.16504669189453 and parameters: {'r_scaling': 10.799412201699953	'unroll': 10	'update_epoch': 2	'discount': 0.916830260398485	'lr': 0.00018184926756599872	'entropy': 0.0012731926545185156}. Best is trial 0 with value: 90.8761978149414. [0m
[32m[I 2022-01-12 22:47:50	948] [0m Trial 9 finished with value: 100.16593933105469 and parameters: {'r_scaling': 0.15255639479532598	'unroll': 14	'update_epoch': 4	'discount': 0.9356131895926579	'lr': 0.000830277595514922	'entropy': 0.004545943511716414}. Best is trial 0 with value: 90.8761978149414. [0m
[32m[I 2022-01-12 22:49:25	405] [0m Trial 10 finished with value: 95.5249252319336 and parameters: {'r_scaling': 0.9838213260725163	'unroll': 4	'update_epoch': 15	'discount': 0.9023853239480256	'lr': 0.001961327441743546	'entropy': 0.05452438371087846}. Best is trial 0 with value: 90.8761978149414. [0m
[32m[I 2022-01-12 22:52:11	552] [0m Trial 11 finished with value: 97.35195922851562 and parameters: {'r_scaling': 0.05718807469482518	'unroll': 7	'update_epoch': 6	'discount': 0.9864678938844968	'lr': 0.00042767567019468347	'entropy': 0.08697976645361502}. Best is trial 0 with value: 90.8761978149414. [0m
[32m[I 2022-01-12 22:53:48	817] [0m Trial 12 finished with value: 99.76747131347656 and parameters: {'r_scaling': 0.3813099249774816	'unroll': 5	'update_epoch': 10	'discount': 0.9562777551580283	'lr': 0.00046719069465281	'entropy': 0.021323381170824347}. Best is trial 0 with value: 90.8761978149414. [0m
[32m[I 2022-01-12 22:56:43	292] [0m Trial 13 finished with value: 96.15675354003906 and parameters: {'r_scaling': 0.05586028558177936	'unroll': 10	'update_epoch': 15	'discount': 0.9236413622300721	'lr': 0.0018480370007464377	'entropy': 0.015125199748091575}. Best is trial 0 with value: 90.8761978149414. [0m
[32m[I 2022-01-12 22:59:36	342] [0m Trial 14 finished with value: 95.34591674804688 and parameters: {'r_scaling': 0.31651503451553514	'unroll': 2	'update_epoch': 5	'discount': 0.90282108042088	'lr': 0.00031522240291670617	'entropy': 0.0006839033042225162}. Best is trial 0 with value: 90.8761978149414. [0m
[32m[I 2022-01-12 23:02:32	598] [0m Trial 15 finished with value: 98.87246704101562 and parameters: {'r_scaling': 1.1836821049986113	'unroll': 10	'update_epoch': 1	'discount': 0.9531785880011701	'lr': 0.0006452285766308779	'entropy': 0.031379038498096035}. Best is trial 0 with value: 90.8761978149414. [0m
[32m[I 2022-01-12 23:04:07	040] [0m Trial 16 finished with value: 98.68295288085938 and parameters: {'r_scaling': 0.2392706743313305	'unroll': 5	'update_epoch': 9	'discount': 0.9297828232979133	'lr': 0.0012027712515099169	'entropy': 0.0018567153342702652}. Best is trial 0 with value: 90.8761978149414. [0m
[32m[I 2022-01-12 23:07:00	940] [0m Trial 17 finished with value: 100.5589828491211 and parameters: {'r_scaling': 0.10834301089228265	'unroll': 8	'update_epoch': 14	'discount': 0.9123729955194865	'lr': 0.0003001938438143998	'entropy': 0.008565806064508354}. Best is trial 0 with value: 90.8761978149414. [0m
[32m[I 2022-01-12 23:09:59	552] [0m Trial 18 finished with value: 97.28324127197266 and parameters: {'r_scaling': 0.8995434146440752	'unroll': 3	'update_epoch': 7	'discount': 0.9531089651254286	'lr': 0.0013215860371929675	'entropy': 0.00040423187160658716}. Best is trial 0 with value: 90.8761978149414. [0m
[32m[I 2022-01-12 23:12:52	572] [0m Trial 19 finished with value: 96.9371337890625 and parameters: {'r_scaling': 0.5081887205353806	'unroll': 8	'update_epoch': 13	'discount': 0.9340108826719912	'lr': 0.0006232257265714919	'entropy': 0.0007151349607915399}. Best is trial 0 with value: 90.8761978149414. [0m
[32m[I 2022-01-12 23:14:27	385] [0m Trial 20 finished with value: 98.9129638671875 and parameters: {'r_scaling': 0.12433844148817125	'unroll': 6	'update_epoch': 5	'discount': 0.9203432869147952	'lr': 0.00032667833957780214	'entropy': 0.007889936559103907}. Best is trial 0 with value: 90.8761978149414. [0m
[32m[I 2022-01-12 23:16:10	948] [0m Trial 21 finished with value: -1812.381103515625 and parameters: {'r_scaling': 0.27411055349315505	'unroll': 1	'update_epoch': 5	'discount': 0.900379627870216	'lr': 0.00033616521595627714	'entropy': 0.00010130463961767454}. Best is trial 21 with value: -1812.381103515625. [0m
[32m[I 2022-01-12 23:18:49	312] [0m Trial 22 finished with value: -1151.328125 and parameters: {'r_scaling': 0.09299423860499872	'unroll': 1	'update_epoch': 3	'discount': 0.9090395393543209	'lr': 0.00024198268790957331	'entropy': 0.00013195740720420017}. Best is trial 21 with value: -1812.381103515625. [0m
[32m[I 2022-01-12 23:21:27	728] [0m Trial 23 finished with value: 97.7023696899414 and parameters: {'r_scaling': 0.055674073599998535	'unroll': 2	'update_epoch': 3	'discount': 0.9065899211609255	'lr': 0.00021041348577261864	'entropy': 0.00010298189518422301}. Best is trial 21 with value: -1812.381103515625. [0m
[32m[I 2022-01-12 23:23:08	588] [0m Trial 24 finished with value: -724.8318481445312 and parameters: {'r_scaling': 0.0978914691425084	'unroll': 1	'update_epoch': 1	'discount': 0.9086623202813151	'lr': 0.00023676357201292473	'entropy': 0.00010174869065684873}. Best is trial 21 with value: -1812.381103515625. [0m
[32m[I 2022-01-12 23:25:33	311] [0m Trial 25 finished with value: -601.5689697265625 and parameters: {'r_scaling': 1.8913078310088551	'unroll': 1	'update_epoch': 1	'discount': 0.9000815971726641	'lr': 0.00013700705114791286	'entropy': 0.00011405741389100691}. Best is trial 21 with value: -1812.381103515625. [0m
[32m[I 2022-01-12 23:27:57	054] [0m Trial 26 finished with value: -1574.0391845703125 and parameters: {'r_scaling': 0.6938650730164885	'unroll': 1	'update_epoch': 3	'discount': 0.9096862413645174	'lr': 0.0002228232060978829	'entropy': 0.00026056833603250475}. Best is trial 21 with value: -1812.381103515625. [0m
[32m[I 2022-01-12 23:30:18	372] [0m Trial 27 finished with value: 97.52640533447266 and parameters: {'r_scaling': 0.6465008254586725	'unroll': 3	'update_epoch': 3	'discount': 0.9084242257160553	'lr': 0.00025970187906189374	'entropy': 0.00028641524754970923}. Best is trial 21 with value: -1812.381103515625. [0m
[32m[I 2022-01-12 23:32:51	491] [0m Trial 28 finished with value: 97.14833068847656 and parameters: {'r_scaling': 4.6500960757928	'unroll': 2	'update_epoch': 4	'discount': 0.9201738839472544	'lr': 0.0003858344026299627	'entropy': 0.00022845731639000623}. Best is trial 21 with value: -1812.381103515625. [0m
[32m[I 2022-01-12 23:34:25	864] [0m Trial 29 finished with value: 101.34088134765625 and parameters: {'r_scaling': 1.6468780017564515	'unroll': 4	'update_epoch': 2	'discount': 0.9137455734112846	'lr': 0.0001528113802728856	'entropy': 0.00038287977499666464}. Best is trial 21 with value: -1812.381103515625. [0m
[32m[I 2022-01-12 23:36:58	375] [0m Trial 30 finished with value: -1288.322265625 and parameters: {'r_scaling': 0.5523591937820282	'unroll': 1	'update_epoch': 6	'discount': 0.9875875094287433	'lr': 0.00014369062188644024	'entropy': 0.00017221914642594823}. Best is trial 21 with value: -1812.381103515625. [0m
[32m[I 2022-01-12 23:39:23	046] [0m Trial 31 finished with value: -760.9964599609375 and parameters: {'r_scaling': 0.4785536843210765	'unroll': 1	'update_epoch': 6	'discount': 0.9926075265826748	'lr': 0.00010392361337087505	'entropy': 0.00015759185138038807}. Best is trial 21 with value: -1812.381103515625. [0m
[32m[I 2022-01-12 23:40:59	546] [0m Trial 32 finished with value: 94.52043914794922 and parameters: {'r_scaling': 0.26596002385279904	'unroll': 2	'update_epoch': 4	'discount': 0.9766430966802573	'lr': 0.00014471522915398026	'entropy': 0.0003049259667423589}. Best is trial 21 with value: -1812.381103515625. [0m
[32m[I 2022-01-12 23:43:35	711] [0m Trial 33 finished with value: 94.92112731933594 and parameters: {'r_scaling': 2.4948016591380253	'unroll': 4	'update_epoch': 8	'discount': 0.9813280168291131	'lr': 0.0001753609265128061	'entropy': 0.00017150404838898165}. Best is trial 21 with value: -1812.381103515625. [0m
[32m[I 2022-01-12 23:46:07	461] [0m Trial 34 finished with value: -1756.886962890625 and parameters: {'r_scaling': 0.19928997090688577	'unroll': 1	'update_epoch': 6	'discount': 0.9680841484218476	'lr': 0.00025501201604307566	'entropy': 0.0005564576729466884}. Best is trial 21 with value: -1812.381103515625. [0m
[32m[I 2022-01-12 23:48:40	963] [0m Trial 35 finished with value: 101.74919891357422 and parameters: {'r_scaling': 0.6753682288619988	'unroll': 3	'update_epoch': 7	'discount': 0.9632146696227886	'lr': 0.00012238467384023338	'entropy': 0.0005665274047953878}. Best is trial 21 with value: -1812.381103515625. [0m
[32m[I 2022-01-12 23:50:17	872] [0m Trial 36 finished with value: 98.41729736328125 and parameters: {'r_scaling': 0.2004816642562807	'unroll': 2	'update_epoch': 6	'discount': 0.9933170051346029	'lr': 0.00037262026528809335	'entropy': 0.000243302536540845}. Best is trial 21 with value: -1812.381103515625. [0m
[32m[I 2022-01-12 23:51:57	090] [0m Trial 37 finished with value: 97.42532348632812 and parameters: {'r_scaling': 3.876389053824775	'unroll': 3	'update_epoch': 8	'discount': 0.9695318332520555	'lr': 0.000209588194572726	'entropy': 0.0009172462217593284}. Best is trial 21 with value: -1812.381103515625. [0m
[32m[I 2022-01-12 23:53:48	881] [0m Trial 38 finished with value: 98.27044677734375 and parameters: {'r_scaling': 0.36697315180757434	'unroll': 12	'update_epoch': 5	'discount': 0.9825057809954044	'lr': 0.00027215464131945775	'entropy': 0.00020157163340123427}. Best is trial 21 with value: -1812.381103515625. [0m
[32m[I 2022-01-12 23:55:47	642] [0m Trial 39 finished with value: -1753.39794921875 and parameters: {'r_scaling': 0.16548221814309308	'unroll': 1	'update_epoch': 9	'discount': 0.9473186464409706	'lr': 0.0005377782928113805	'entropy': 0.0023251350564967945}. Best is trial 21 with value: -1812.381103515625. [0m
[32m[I 2022-01-12 23:58:36	791] [0m Trial 40 finished with value: 99.9486083984375 and parameters: {'r_scaling': 7.304844000788501	'unroll': 4	'update_epoch': 10	'discount': 0.9459688428215727	'lr': 0.00056587896555683	'entropy': 0.0023942289343173717}. Best is trial 21 with value: -1812.381103515625. [0m
[32m[I 2022-01-13 00:01:18	607] [0m Trial 41 finished with value: -1916.371826171875 and parameters: {'r_scaling': 0.22246076727430097	'unroll': 1	'update_epoch': 7	'discount': 0.9639106698842886	'lr': 0.0005036296217925854	'entropy': 0.004641574246502458}. Best is trial 41 with value: -1916.371826171875. [0m
[32m[I 2022-01-13 00:03:59	332] [0m Trial 42 finished with value: 99.39022827148438 and parameters: {'r_scaling': 0.1403564540921643	'unroll': 2	'update_epoch': 9	'discount': 0.9626684146320921	'lr': 0.0005051262557071098	'entropy': 0.0024139694131035815}. Best is trial 41 with value: -1916.371826171875. [0m
[32m[I 2022-01-13 00:06:30	365] [0m Trial 43 finished with value: -1307.877197265625 and parameters: {'r_scaling': 0.1760158207926995	'unroll': 1	'update_epoch': 7	'discount': 0.9593588595236916	'lr': 0.0007657908261776925	'entropy': 0.0037039287320837838}. Best is trial 41 with value: -1916.371826171875. [0m
[32m[I 2022-01-13 00:08:10	461] [0m Trial 44 finished with value: 96.25942993164062 and parameters: {'r_scaling': 0.25623179443664174	'unroll': 2	'update_epoch': 8	'discount': 0.9696234898842307	'lr': 0.0003776478546564911	'entropy': 0.005682061926037149}. Best is trial 41 with value: -1916.371826171875. [0m
[32m[I 2022-01-13 00:10:49	687] [0m Trial 45 finished with value: 96.12134552001953 and parameters: {'r_scaling': 101.63561999606051	'unroll': 3	'update_epoch': 9	'discount': 0.9747230423099716	'lr': 0.00042130490472401424	'entropy': 0.001036397617413768}. Best is trial 41 with value: -1916.371826171875. [0m
[32m[I 2022-01-13 00:13:22	432] [0m Trial 46 finished with value: -2064.738037109375 and parameters: {'r_scaling': 0.07140682797549544	'unroll': 1	'update_epoch': 11	'discount': 0.9417373265621688	'lr': 0.0005287058043025698	'entropy': 0.002809452988315527}. Best is trial 46 with value: -2064.738037109375. [0m
[32m[I 2022-01-13 00:16:03	118] [0m Trial 47 finished with value: 99.21795654296875 and parameters: {'r_scaling': 0.07263316898925061	'unroll': 15	'update_epoch': 11	'discount': 0.9412185855632874	'lr': 0.0005092885126694043	'entropy': 0.012803167711504035}. Best is trial 46 with value: -2064.738037109375. [0m
[32m[I 2022-01-13 00:17:44	154] [0m Trial 48 finished with value: 99.33261108398438 and parameters: {'r_scaling': 0.07604297337040955	'unroll': 2	'update_epoch': 12	'discount': 0.9502384561167294	'lr': 0.000716859801835809	'entropy': 0.005161441886557547}. Best is trial 46 with value: -2064.738037109375. [0m
[32m[I 2022-01-13 00:19:28	507] [0m Trial 49 finished with value: 97.29664611816406 and parameters: {'r_scaling': 0.1656002294244495	'unroll': 3	'update_epoch': 10	'discount': 0.9664129781060943	'lr': 0.0005992819562870841	'entropy': 0.002849247934134462}. Best is trial 46 with value: -2064.738037109375. [0m
[32m[I 2022-01-13 00:21:05	157] [0m Trial 50 finished with value: 97.28083801269531 and parameters: {'r_scaling': 0.3322670620596015	'unroll': 4	'update_epoch': 11	'discount': 0.9476322415973182	'lr': 0.0009318073651301724	'entropy': 0.0016918819478709069}. Best is trial 46 with value: -2064.738037109375. [0m
[32m[I 2022-01-13 00:22:58	804] [0m Trial 51 finished with value: -1920.32861328125 and parameters: {'r_scaling': 0.12859163026635606	'unroll': 1	'update_epoch': 7	'discount': 0.9587843796660556	'lr': 0.0003451956974415744	'entropy': 0.003883366189383527}. Best is trial 46 with value: -2064.738037109375. [0m
[32m[I 2022-01-13 00:24:49	277] [0m Trial 52 finished with value: -1664.835205078125 and parameters: {'r_scaling': 0.11334007623972675	'unroll': 1	'update_epoch': 7	'discount': 0.9587319964711357	'lr': 0.00034000247005783543	'entropy': 0.0035005538742077106}. Best is trial 46 with value: -2064.738037109375. [0m
[32m[I 2022-01-13 00:26:41	036] [0m Trial 53 finished with value: -1977.794677734375 and parameters: {'r_scaling': 0.206504329364447	'unroll': 1	'update_epoch': 9	'discount': 0.9550609513352585	'lr': 0.0004519834071176551	'entropy': 0.010535765407853576}. Best is trial 46 with value: -2064.738037109375. [0m
[32m[I 2022-01-13 00:28:20	168] [0m Trial 54 finished with value: 100.71688842773438 and parameters: {'r_scaling': 0.07973400347677015	'unroll': 2	'update_epoch': 6	'discount': 0.9596862275091171	'lr': 0.00045502103781918594	'entropy': 0.010457749747002717}. Best is trial 46 with value: -2064.738037109375. [0m
[32m[I 2022-01-13 00:29:53	897] [0m Trial 55 finished with value: 96.08358764648438 and parameters: {'r_scaling': 0.42334364099292654	'unroll': 11	'update_epoch': 7	'discount': 0.9552747819835452	'lr': 0.0002896939183359488	'entropy': 0.020700420624286467}. Best is trial 46 with value: -2064.738037109375. [0m
[32m[I 2022-01-13 00:31:29	163] [0m Trial 56 finished with value: 99.55424499511719 and parameters: {'r_scaling': 0.21512400272733653	'unroll': 2	'update_epoch': 5	'discount': 0.9661758708297412	'lr': 0.0003396460941365117	'entropy': 0.006781783958963246}. Best is trial 46 with value: -2064.738037109375. [0m
[32m[I 2022-01-13 00:33:27	184] [0m Trial 57 finished with value: -1184.728271484375 and parameters: {'r_scaling': 0.137676258263626	'unroll': 1	'update_epoch': 8	'discount': 0.9744091921231156	'lr': 0.0003937048250316601	'entropy': 0.03884451104558201}. Best is trial 46 with value: -2064.738037109375. [0m
[32m[I 2022-01-13 00:35:06	428] [0m Trial 58 finished with value: 98.54100036621094 and parameters: {'r_scaling': 0.058123133233566666	'unroll': 3	'update_epoch': 10	'discount': 0.9353700503201691	'lr': 0.0006777921223863534	'entropy': 0.01704338293965886}. Best is trial 46 with value: -2064.738037109375. [0m
[32m[I 2022-01-13 00:36:45	052] [0m Trial 59 finished with value: 97.35064697265625 and parameters: {'r_scaling': 0.10118350460085683	'unroll': 5	'update_epoch': 13	'discount': 0.9544548037074164	'lr': 0.00046928924639574296	'entropy': 0.0014720269139552827}. Best is trial 46 with value: -2064.738037109375. [0m
[32m[I 2022-01-13 00:39:40	214] [0m Trial 60 finished with value: 99.58245086669922 and parameters: {'r_scaling': 0.29530975856454145	'unroll': 9	'update_epoch': 4	'discount': 0.9289930153102226	'lr': 0.0002978431521583844	'entropy': 0.004458120695209094}. Best is trial 46 with value: -2064.738037109375. [0m
[32m[I 2022-01-13 00:41:38	180] [0m Trial 61 finished with value: -1773.93017578125 and parameters: {'r_scaling': 0.16903198790484955	'unroll': 1	'update_epoch': 9	'discount': 0.9499975905006482	'lr': 0.0004990407408047248	'entropy': 0.010219603050534284}. Best is trial 46 with value: -2064.738037109375. [0m
[32m[I 2022-01-13 00:43:34	975] [0m Trial 62 finished with value: -1966.868408203125 and parameters: {'r_scaling': 0.20969112795151082	'unroll': 1	'update_epoch': 8	'discount': 0.950470196039143	'lr': 0.00043131620006102905	'entropy': 0.009867986759199542}. Best is trial 46 with value: -2064.738037109375. [0m
[32m[I 2022-01-13 00:46:02	955] [0m Trial 63 finished with value: 100.85391235351562 and parameters: {'r_scaling': 0.1207675142578349	'unroll': 2	'update_epoch': 9	'discount': 0.9399316893142075	'lr': 0.000489082962596614	'entropy': 0.010210602455502017}. Best is trial 46 with value: -2064.738037109375. [0m
[32m[I 2022-01-13 00:47:51	681] [0m Trial 64 finished with value: -2041.0794677734375 and parameters: {'r_scaling': 0.9039697572160379	'unroll': 1	'update_epoch': 11	'discount': 0.9500472924287882	'lr': 0.0004394777960361351	'entropy': 0.02868791205717683}. Best is trial 46 with value: -2064.738037109375. [0m
[32m[I 2022-01-13 00:49:27	329] [0m Trial 65 finished with value: 94.1016845703125 and parameters: {'r_scaling': 1.0647855831356916	'unroll': 2	'update_epoch': 12	'discount': 0.9436385749207153	'lr': 0.0004087296885270256	'entropy': 0.03478892525404065}. Best is trial 46 with value: -2064.738037109375. [0m
[32m[I 2022-01-13 00:52:02	589] [0m Trial 66 finished with value: -1948.369384765625 and parameters: {'r_scaling': 0.8021503972904536	'unroll': 1	'update_epoch': 11	'discount': 0.9571313052397301	'lr': 0.000353049600820784	'entropy': 0.06769648302736128}. Best is trial 46 with value: -2064.738037109375. [0m
[32m[I 2022-01-13 00:54:25	028] [0m Trial 67 finished with value: -1766.4033203125 and parameters: {'r_scaling': 0.7921014917367802	'unroll': 1	'update_epoch': 11	'discount': 0.9569704062675685	'lr': 0.0005679899846546387	'entropy': 0.06955838423264155}. Best is trial 46 with value: -2064.738037109375. [0m
[32m[I 2022-01-13 00:56:55	950] [0m Trial 68 finished with value: 99.69987487792969 and parameters: {'r_scaling': 1.5022952289211904	'unroll': 7	'update_epoch': 12	'discount': 0.9508857511141722	'lr': 0.0004352228623107384	'entropy': 0.027434142760567062}. Best is trial 46 with value: -2064.738037109375. [0m
[32m[I 2022-01-13 00:59:28	473] [0m Trial 69 finished with value: 97.08787536621094 and parameters: {'r_scaling': 2.705555914916406	'unroll': 2	'update_epoch': 14	'discount': 0.9618655526205724	'lr': 0.00036082168429442374	'entropy': 0.05387492898323131}. Best is trial 46 with value: -2064.738037109375. [0m
[32m[I 2022-01-13 01:02:07	242] [0m Trial 70 finished with value: 99.64302062988281 and parameters: {'r_scaling': 1.3568932134715	'unroll': 3	'update_epoch': 10	'discount': 0.9386064392006191	'lr': 0.0006109731495826378	'entropy': 0.006611985750422395}. Best is trial 46 with value: -2064.738037109375. [0m
[32m[I 2022-01-13 01:04:50	269] [0m Trial 71 finished with value: -1960.6434326171875 and parameters: {'r_scaling': 0.5081360003455134	'unroll': 1	'update_epoch': 11	'discount': 0.9516525582254372	'lr': 0.0003223279611951366	'entropy': 0.04785150857064768}. Best is trial 46 with value: -2064.738037109375. [0m
[32m[I 2022-01-13 01:07:19	445] [0m Trial 72 finished with value: -1141.7904052734375 and parameters: {'r_scaling': 0.4346325237170469	'unroll': 1	'update_epoch': 11	'discount': 0.9522462799083713	'lr': 0.00044484083862475347	'entropy': 0.09964630338942042}. Best is trial 46 with value: -2064.738037109375. [0m
[32m[I 2022-01-13 01:09:49	279] [0m Trial 73 finished with value: -1920.9124755859375 and parameters: {'r_scaling': 0.5358985752999745	'unroll': 1	'update_epoch': 11	'discount': 0.945950064638349	'lr': 0.0003499503007478398	'entropy': 0.04662627598323743}. Best is trial 46 with value: -2064.738037109375. [0m
[32m[I 2022-01-13 01:12:11	950] [0m Trial 74 finished with value: 98.56697082519531 and parameters: {'r_scaling': 0.5769078482308009	'unroll': 2	'update_epoch': 12	'discount': 0.9444660276862371	'lr': 0.0002820232583069394	'entropy': 0.04394077199278188}. Best is trial 46 with value: -2064.738037109375. [0m
[32m[I 2022-01-13 01:14:40	521] [0m Trial 75 finished with value: -1978.50048828125 and parameters: {'r_scaling': 0.8716472625743249	'unroll': 1	'update_epoch': 10	'discount': 0.9481841954283828	'lr': 0.0003254343201740618	'entropy': 0.06560425660029899}. Best is trial 46 with value: -2064.738037109375. [0m
[32m[I 2022-01-13 01:17:07	764] [0m Trial 76 finished with value: -1929.43115234375 and parameters: {'r_scaling': 0.8918235958905479	'unroll': 1	'update_epoch': 11	'discount': 0.9313208494690033	'lr': 0.00031250151241501127	'entropy': 0.07520335479637552}. Best is trial 46 with value: -2064.738037109375. [0m
[32m[I 2022-01-13 01:19:31	780] [0m Trial 77 finished with value: 93.93721008300781 and parameters: {'r_scaling': 2.147494302305701	'unroll': 3	'update_epoch': 13	'discount': 0.9324665969682044	'lr': 0.0004032892023985563	'entropy': 0.0703470079760096}. Best is trial 46 with value: -2064.738037109375. [0m
[32m[I 2022-01-13 01:22:05	122] [0m Trial 78 finished with value: 101.96357727050781 and parameters: {'r_scaling': 0.8564750031530709	'unroll': 2	'update_epoch': 10	'discount': 0.9370429464764469	'lr': 0.0003171318847194142	'entropy': 0.027786219750122396}. Best is trial 46 with value: -2064.738037109375. [0m
[32m[I 2022-01-13 01:24:34	350] [0m Trial 79 finished with value: -2013.623291015625 and parameters: {'r_scaling': 1.301165882062559	'unroll': 1	'update_epoch': 12	'discount': 0.9256542857103592	'lr': 0.00031275268907639264	'entropy': 0.06257825238893389}. Best is trial 46 with value: -2064.738037109375. [0m
[32m[I 2022-01-13 01:26:07	637] [0m Trial 80 finished with value: 98.38298034667969 and parameters: {'r_scaling': 1.9467882784829524	'unroll': 2	'update_epoch': 12	'discount': 0.9241209405571074	'lr': 0.00025716362419197554	'entropy': 0.06382001441763727}. Best is trial 46 with value: -2064.738037109375. [0m
[32m[I 2022-01-13 01:28:39	678] [0m Trial 81 finished with value: -1866.00732421875 and parameters: {'r_scaling': 1.103081622613856	'unroll': 1	'update_epoch': 11	'discount': 0.9318227880593523	'lr': 0.0003133473495685405	'entropy': 0.08832222249875571}. Best is trial 46 with value: -2064.738037109375. [0m
[32m[I 2022-01-13 01:30:25	372] [0m Trial 82 finished with value: -2012.1922607421875 and parameters: {'r_scaling': 1.188405120382966	'unroll': 1	'update_epoch': 10	'discount': 0.9414369969857006	'lr': 0.0002266314465514323	'entropy': 0.06127136221744388}. Best is trial 46 with value: -2064.738037109375. [0m
[32m[I 2022-01-13 01:32:48	890] [0m Trial 83 finished with value: -2026.1591796875 and parameters: {'r_scaling': 1.1829758360314824	'unroll': 1	'update_epoch': 10	'discount': 0.9524027782478359	'lr': 0.000370670450371148	'entropy': 0.0554284544684306}. Best is trial 46 with value: -2064.738037109375. [0m
[32m[I 2022-01-13 01:35:12	129] [0m Trial 84 finished with value: 95.98985290527344 and parameters: {'r_scaling': 1.2669509572925595	'unroll': 2	'update_epoch': 10	'discount': 0.9486116531411103	'lr': 0.00022290324751202443	'entropy': 0.050672620272703535}. Best is trial 46 with value: -2064.738037109375. [0m
[32m[I 2022-01-13 01:37:35	510] [0m Trial 85 finished with value: -1709.2174072265625 and parameters: {'r_scaling': 2.2613652818296197	'unroll': 1	'update_epoch': 10	'discount': 0.9414732364522063	'lr': 0.00017279733324044975	'entropy': 0.05777357630540113}. Best is trial 46 with value: -2064.738037109375. [0m
[32m[I 2022-01-13 01:40:01	473] [0m Trial 86 finished with value: 99.6596908569336 and parameters: {'r_scaling': 3.2633271233016385	'unroll': 3	'update_epoch': 9	'discount': 0.9527717879079439	'lr': 0.0005611082813627335	'entropy': 0.022895779619165203}. Best is trial 46 with value: -2064.738037109375. [0m
[32m[I 2022-01-13 01:42:25	141] [0m Trial 87 finished with value: -1773.0936279296875 and parameters: {'r_scaling': 1.6007706524011898	'unroll': 1	'update_epoch': 10	'discount': 0.942913537345828	'lr': 0.00019529519568777795	'entropy': 0.03814133523347891}. Best is trial 46 with value: -2064.738037109375. [0m
[32m[I 2022-01-13 01:44:48	766] [0m Trial 88 finished with value: 96.01655578613281 and parameters: {'r_scaling': 0.6659485430355708	'unroll': 2	'update_epoch': 14	'discount': 0.9267661706804448	'lr': 0.000379694164485901	'entropy': 0.030909939925818485}. Best is trial 46 with value: -2064.738037109375. [0m
[32m[I 2022-01-13 01:46:22	826] [0m Trial 89 finished with value: 92.8177490234375 and parameters: {'r_scaling': 0.36826983453156253	'unroll': 2	'update_epoch': 8	'discount': 0.9487446043372897	'lr': 0.00024224830153818055	'entropy': 0.04392938233237943}. Best is trial 46 with value: -2064.738037109375. [0m
[32m[I 2022-01-13 01:48:57	287] [0m Trial 90 finished with value: -1901.395263671875 and parameters: {'r_scaling': 5.811349228062694	'unroll': 1	'update_epoch': 9	'discount': 0.9176617115383335	'lr': 0.00042773688313081155	'entropy': 0.08641608750240772}. Best is trial 46 with value: -2064.738037109375. [0m
[32m[I 2022-01-13 01:50:50	383] [0m Trial 91 finished with value: -2058.7685546875 and parameters: {'r_scaling': 0.7985260451687922	'unroll': 1	'update_epoch': 11	'discount': 0.9567676876177625	'lr': 0.00045537835382789823	'entropy': 0.053919478238885654}. Best is trial 46 with value: -2064.738037109375. [0m
[32m[I 2022-01-13 01:53:24	898] [0m Trial 92 finished with value: -1966.023681640625 and parameters: {'r_scaling': 1.2552587894457659	'unroll': 1	'update_epoch': 12	'discount': 0.9542247326696238	'lr': 0.00046732536209279036	'entropy': 0.05974979785442753}. Best is trial 46 with value: -2064.738037109375. [0m
[32m[I 2022-01-13 01:55:11	330] [0m Trial 93 finished with value: -1967.6689453125 and parameters: {'r_scaling': 1.0744698890858917	'unroll': 1	'update_epoch': 12	'discount': 0.9535632743386496	'lr': 0.0005309186225758795	'entropy': 0.0600825943459721}. Best is trial 46 with value: -2064.738037109375. [0m
[32m[I 2022-01-13 01:57:32	788] [0m Trial 94 finished with value: 99.69241333007812 and parameters: {'r_scaling': 0.9945809603352979	'unroll': 2	'update_epoch': 13	'discount': 0.9449623723711776	'lr': 0.0005468887308546217	'entropy': 0.08167458494350008}. Best is trial 46 with value: -2064.738037109375. [0m
[32m[I 2022-01-13 01:59:55	397] [0m Trial 95 finished with value: -766.1876831054688 and parameters: {'r_scaling': 1.8529355903235487	'unroll': 1	'update_epoch': 10	'discount': 0.9614135091214328	'lr': 0.0005270239879893085	'entropy': 0.016191752425550494}. Best is trial 46 with value: -2064.738037109375. [0m
[32m[I 2022-01-13 02:02:14	372] [0m Trial 96 finished with value: -2012.5067138671875 and parameters: {'r_scaling': 21.87262363082561	'unroll': 1	'update_epoch': 12	'discount': 0.9552500512958122	'lr': 0.0006346430242431629	'entropy': 0.03994022453974348}. Best is trial 46 with value: -2064.738037109375. [0m
[32m[I 2022-01-13 02:04:34	939] [0m Trial 97 finished with value: 97.0085220336914 and parameters: {'r_scaling': 17.11977613814472	'unroll': 2	'update_epoch': 12	'discount': 0.9557981750031076	'lr': 0.0006744622289237704	'entropy': 0.038126701682214666}. Best is trial 46 with value: -2064.738037109375. [0m
[32m[I 2022-01-13 02:06:59	427] [0m Trial 98 finished with value: -1513.836669921875 and parameters: {'r_scaling': 61.30044844335759	'unroll': 1	'update_epoch': 12	'discount': 0.946531486369317	'lr': 0.000596237875304751	'entropy': 0.02294958354667729}. Best is trial 46 with value: -2064.738037109375. [0m
[32m[I 2022-01-13 02:09:24	061] [0m Trial 99 finished with value: 98.79146575927734 and parameters: {'r_scaling': 10.56672005673917	'unroll': 2	'update_epoch': 10	'discount': 0.9384374837480354	'lr': 0.0006414274820004392	'entropy': 0.0986420404847653}. Best is trial 46 with value: -2064.738037109375. [0m
[32m[I 2022-01-13 02:10:57	709] [0m Trial 100 finished with value: 98.90153503417969 and parameters: {'r_scaling': 3.294728003231589	'unroll': 6	'update_epoch': 13	'discount': 0.954055807153565	'lr': 0.00047690474846025157	'entropy': 0.03360990456908643}. Best is trial 46 with value: -2064.738037109375. [0m
[32m[I 2022-01-13 02:13:28	985] [0m Trial 101 finished with value: -1373.749267578125 and parameters: {'r_scaling': 158.06403391363767	'unroll': 1	'update_epoch': 11	'discount': 0.9489176219397654	'lr': 0.00040154367916620464	'entropy': 0.05448583280252745}. Best is trial 46 with value: -2064.738037109375. [0m
[32m[I 2022-01-13 02:15:54	163] [0m Trial 102 finished with value: -1924.16162109375 and parameters: {'r_scaling': 0.709452843988175	'unroll': 1	'update_epoch': 11	'discount': 0.956565370654979	'lr': 0.0008262882537162602	'entropy': 0.018793335635903047}. Best is trial 46 with value: -2064.738037109375. [0m
[32m[I 2022-01-13 02:18:23	462] [0m Trial 103 finished with value: 101.94064331054688 and parameters: {'r_scaling': 26.348467486885507	'unroll': 1	'update_epoch': 9	'discount': 0.9601408640890967	'lr': 0.0007295414844828147	'entropy': 0.027195668865573425}. Best is trial 46 with value: -2064.738037109375. [0m
[32m[I 2022-01-13 02:19:58	683] [0m Trial 104 finished with value: 94.38433837890625 and parameters: {'r_scaling': 1.028471115549188	'unroll': 2	'update_epoch': 12	'discount': 0.9503027575758085	'lr': 0.000443908572250854	'entropy': 0.04262548110088545}. Best is trial 46 with value: -2064.738037109375. [0m
[32m[I 2022-01-13 02:22:35	158] [0m Trial 105 finished with value: -2037.98876953125 and parameters: {'r_scaling': 1.5430258966815427	'unroll': 1	'update_epoch': 11	'discount': 0.9422295966669157	'lr': 0.00027248157848126656	'entropy': 0.013489647951695008}. Best is trial 46 with value: -2064.738037109375. [0m
[32m[I 2022-01-13 02:25:00	494] [0m Trial 106 finished with value: -1950.2620849609375 and parameters: {'r_scaling': 1.4010823316739158	'unroll': 1	'update_epoch': 11	'discount': 0.9427269544551287	'lr': 0.0002323462533679248	'entropy': 0.06165214445557142}. Best is trial 46 with value: -2064.738037109375. [0m
[32m[I 2022-01-13 02:27:28	833] [0m Trial 107 finished with value: 98.77937316894531 and parameters: {'r_scaling': 1.17164909821939	'unroll': 2	'update_epoch': 13	'discount': 0.9473002982715579	'lr': 0.0002917902131948835	'entropy': 0.012912105811264334}. Best is trial 46 with value: -2064.738037109375. [0m
[32m[I 2022-01-13 02:29:59	919] [0m Trial 108 finished with value: 97.19010925292969 and parameters: {'r_scaling': 1.644386245028995	'unroll': 3	'update_epoch': 10	'discount': 0.9340285815044915	'lr': 0.0002630106856557401	'entropy': 0.07431465941445804}. Best is trial 46 with value: -2064.738037109375. [0m
[32m[I 2022-01-13 02:31:55	769] [0m Trial 109 finished with value: -2094.685302734375 and parameters: {'r_scaling': 0.5954332744887171	'unroll': 1	'update_epoch': 11	'discount': 0.9577074704373891	'lr': 0.00027746727863109567	'entropy': 0.014060212187109197}. Best is trial 109 with value: -2094.685302734375. [0m
[32m[I 2022-01-13 02:34:26	756] [0m Trial 110 finished with value: 95.61551666259766 and parameters: {'r_scaling': 0.44412541853724635	'unroll': 2	'update_epoch': 11	'discount': 0.9647361691497964	'lr': 0.00020320225452160533	'entropy': 0.012080160719618703}. Best is trial 109 with value: -2094.685302734375. [0m
[32m[I 2022-01-13 02:36:59	193] [0m Trial 111 finished with value: -2161.447265625 and parameters: {'r_scaling': 0.8050668911072878	'unroll': 1	'update_epoch': 12	'discount': 0.958523149697909	'lr': 0.0002722292116132126	'entropy': 0.01440508636002221}. Best is trial 111 with value: -2161.447265625. [0m
[32m[I 2022-01-13 02:39:19	636] [0m Trial 112 finished with value: -2022.095947265625 and parameters: {'r_scaling': 0.6048952703570468	'unroll': 1	'update_epoch': 12	'discount': 0.9570655103371579	'lr': 0.0002758238349976381	'entropy': 0.013213871380729929}. Best is trial 111 with value: -2161.447265625. [0m
[32m[I 2022-01-13 02:41:51	052] [0m Trial 113 finished with value: -2144.96533203125 and parameters: {'r_scaling': 0.7697948598981619	'unroll': 1	'update_epoch': 12	'discount': 0.9589853608960934	'lr': 0.000272691289014069	'entropy': 0.008900680626572722}. Best is trial 111 with value: -2161.447265625. [0m
[32m[I 2022-01-13 02:44:17	446] [0m Trial 114 finished with value: -2137.801025390625 and parameters: {'r_scaling': 0.7263214401334278	'unroll': 1	'update_epoch': 12	'discount': 0.9578345309330195	'lr': 0.0002481188037822098	'entropy': 0.016711453803329477}. Best is trial 111 with value: -2161.447265625. [0m
[32m[I 2022-01-13 02:46:36	684] [0m Trial 115 finished with value: -2098.47265625 and parameters: {'r_scaling': 0.7408223764040104	'unroll': 1	'update_epoch': 12	'discount': 0.9576312063553175	'lr': 0.00027317333905682584	'entropy': 0.007852838780142559}. Best is trial 111 with value: -2161.447265625. [0m
[32m[I 2022-01-13 02:48:57	259] [0m Trial 116 finished with value: 96.43617248535156 and parameters: {'r_scaling': 0.6357226410384883	'unroll': 2	'update_epoch': 13	'discount': 0.9580748642180827	'lr': 0.0002745027990899817	'entropy': 0.008396777905675196}. Best is trial 111 with value: -2161.447265625. [0m
[32m[I 2022-01-13 02:51:25	053] [0m Trial 117 finished with value: -2123.25341796875 and parameters: {'r_scaling': 0.794787390827222	'unroll': 1	'update_epoch': 12	'discount': 0.9617807713787602	'lr': 0.00027582995394933484	'entropy': 0.012580850592574121}. Best is trial 111 with value: -2161.447265625. [0m
[32m[I 2022-01-13 02:53:50	420] [0m Trial 118 finished with value: 98.86260986328125 and parameters: {'r_scaling': 0.7601551666479562	'unroll': 2	'update_epoch': 14	'discount': 0.9612650189326047	'lr': 0.00025059007311183063	'entropy': 0.013617694887950218}. Best is trial 111 with value: -2161.447265625. [0m
[32m[I 2022-01-13 02:56:13	908] [0m Trial 119 finished with value: -2092.23583984375 and parameters: {'r_scaling': 0.552566315518004	'unroll': 1	'update_epoch': 12	'discount': 0.9667000107499703	'lr': 0.0002710379177227584	'entropy': 0.014588907367462633}. Best is trial 111 with value: -2161.447265625. [0m
[32m[I 2022-01-13 02:57:55	263] [0m Trial 120 finished with value: 95.49986267089844 and parameters: {'r_scaling': 0.5420636878278977	'unroll': 2	'update_epoch': 13	'discount': 0.9665477798393431	'lr': 0.0002453302056287052	'entropy': 0.00684686460120797}. Best is trial 111 with value: -2161.447265625. [0m
[32m[I 2022-01-13 03:00:15	669] [0m Trial 121 finished with value: -2068.09912109375 and parameters: {'r_scaling': 0.5849404382595862	'unroll': 1	'update_epoch': 12	'discount': 0.971341174449524	'lr': 0.00027998431388265283	'entropy': 0.018487926163394744}. Best is trial 111 with value: -2161.447265625. [0m
[32m[I 2022-01-13 03:02:02	853] [0m Trial 122 finished with value: -2082.71142578125 and parameters: {'r_scaling': 0.47570537682595027	'unroll': 1	'update_epoch': 12	'discount': 0.9678719001683528	'lr': 0.0002635312789847467	'entropy': 0.01536451149497562}. Best is trial 111 with value: -2161.447265625. [0m
[32m[I 2022-01-13 03:04:31	313] [0m Trial 123 finished with value: 96.16554260253906 and parameters: {'r_scaling': 0.31410914115808464	'unroll': 14	'update_epoch': 12	'discount': 0.9715181011807018	'lr': 0.00021544409429841046	'entropy': 0.018824974544768423}. Best is trial 111 with value: -2161.447265625. [0m
[32m[I 2022-01-13 03:06:21	310] [0m Trial 124 finished with value: -2084.814453125 and parameters: {'r_scaling': 0.4094903704721794	'unroll': 1	'update_epoch': 11	'discount': 0.9710957526970462	'lr': 0.00029218090645559847	'entropy': 0.015298183609192243}. Best is trial 111 with value: -2161.447265625. [0m
[32m[I 2022-01-13 03:08:08	174] [0m Trial 125 finished with value: -2045.958251953125 and parameters: {'r_scaling': 0.36914857513883154	'unroll': 1	'update_epoch': 12	'discount': 0.9745297856633041	'lr': 0.000296260372881344	'entropy': 0.016406365988757683}. Best is trial 111 with value: -2161.447265625. [0m
[32m[I 2022-01-13 03:09:59	471] [0m Trial 126 finished with value: -2080.5966796875 and parameters: {'r_scaling': 0.3590341515096958	'unroll': 1	'update_epoch': 13	'discount': 0.9718120610737138	'lr': 0.00028687850961595313	'entropy': 0.015965415971896706}. Best is trial 111 with value: -2161.447265625. [0m
[32m[I 2022-01-13 03:11:39	956] [0m Trial 127 finished with value: 95.48133850097656 and parameters: {'r_scaling': 0.47421214454980926	'unroll': 9	'update_epoch': 13	'discount': 0.9720900655724974	'lr': 0.0002617532913486949	'entropy': 0.015025989950827339}. Best is trial 111 with value: -2161.447265625. [0m
[32m[I 2022-01-13 03:13:16	587] [0m Trial 128 finished with value: 94.91636657714844 and parameters: {'r_scaling': 0.4081674424002367	'unroll': 2	'update_epoch': 13	'discount': 0.977165603591736	'lr': 0.00023747671669832604	'entropy': 0.01121573397477496}. Best is trial 111 with value: -2161.447265625. [0m
[32m[I 2022-01-13 03:15:56	798] [0m Trial 129 finished with value: -2163.8564453125 and parameters: {'r_scaling': 0.28552256518945934	'unroll': 1	'update_epoch': 15	'discount': 0.9699705295554071	'lr': 0.00028761744478984416	'entropy': 0.019385755488090906}. Best is trial 129 with value: -2163.8564453125. [0m
[32m[I 2022-01-13 03:18:28	237] [0m Trial 130 finished with value: 95.56436157226562 and parameters: {'r_scaling': 0.4792875740259466	'unroll': 2	'update_epoch': 15	'discount': 0.9692132822384261	'lr': 0.00018274289741121831	'entropy': 0.00883182816139116}. Best is trial 129 with value: -2163.8564453125. [0m
[32m[I 2022-01-13 03:20:24	619] [0m Trial 131 finished with value: -2119.427734375 and parameters: {'r_scaling': 0.2876692435948098	'unroll': 1	'update_epoch': 14	'discount': 0.9678630457108225	'lr': 0.00028842920198445703	'entropy': 0.01963465127286508}. Best is trial 129 with value: -2163.8564453125. [0m
[32m[I 2022-01-13 03:22:56	302] [0m Trial 132 finished with value: 97.0180892944336 and parameters: {'r_scaling': 0.2657950516277941	'unroll': 7	'update_epoch': 14	'discount': 0.9681324126002901	'lr': 0.0002889834894194446	'entropy': 0.02025309772931531}. Best is trial 129 with value: -2163.8564453125. [0m
[32m[I 2022-01-13 03:25:30	694] [0m Trial 133 finished with value: -1934.08154296875 and parameters: {'r_scaling': 0.31580986466758165	'unroll': 1	'update_epoch': 15	'discount': 0.9782421605469972	'lr': 0.0002606417734080724	'entropy': 0.024314168535540776}. Best is trial 129 with value: -2163.8564453125. [0m
[32m[I 2022-01-13 03:27:59	219] [0m Trial 134 finished with value: -2266.1064453125 and parameters: {'r_scaling': 0.5798402685949905	'unroll': 1	'update_epoch': 15	'discount': 0.9658705138361215	'lr': 0.00030181208716932676	'entropy': 0.01497283642158358}. Best is trial 134 with value: -2266.1064453125. [0m
[32m[I 2022-01-13 03:29:47	507] [0m Trial 135 finished with value: -2145.144775390625 and parameters: {'r_scaling': 0.3596628172514814	'unroll': 1	'update_epoch': 14	'discount': 0.9723081107503965	'lr': 0.00030478630363619565	'entropy': 0.015189345288477738}. Best is trial 134 with value: -2266.1064453125. [0m
[32m[I 2022-01-13 03:32:13	898] [0m Trial 136 finished with value: -2167.2734375 and parameters: {'r_scaling': 0.2583004122448586	'unroll': 1	'update_epoch': 14	'discount': 0.9657488167343181	'lr': 0.00030900970414224143	'entropy': 0.014795257922474386}. Best is trial 134 with value: -2266.1064453125. [0m
[32m[I 2022-01-13 03:34:42	626] [0m Trial 137 finished with value: -2256.7607421875 and parameters: {'r_scaling': 0.2442717081251711	'unroll': 1	'update_epoch': 14	'discount': 0.9638298805399166	'lr': 0.0003051207870482983	'entropy': 0.01484381796300598}. Best is trial 134 with value: -2266.1064453125. [0m
[32m[I 2022-01-13 03:36:18	088] [0m Trial 138 finished with value: 97.78265380859375 and parameters: {'r_scaling': 0.2624417903399106	'unroll': 2	'update_epoch': 14	'discount': 0.963809871954653	'lr': 0.00030762423535687623	'entropy': 0.009074383962344662}. Best is trial 134 with value: -2266.1064453125. [0m
[32m[I 2022-01-13 03:38:42	228] [0m Trial 139 finished with value: -2216.0107421875 and parameters: {'r_scaling': 0.1884958016771029	'unroll': 1	'update_epoch': 15	'discount': 0.9646839827398572	'lr': 0.0003334712430134328	'entropy': 0.011700319244653428}. Best is trial 134 with value: -2266.1064453125. [0m
[32m[I 2022-01-13 03:41:06	565] [0m Trial 140 finished with value: -2331.33544921875 and parameters: {'r_scaling': 0.2310190037938505	'unroll': 1	'update_epoch': 15	'discount': 0.9652479215031473	'lr': 0.000331610859573403	'entropy': 0.01120977053495917}. Best is trial 140 with value: -2331.33544921875. [0m
[32m[I 2022-01-13 03:43:25	733] [0m Trial 141 finished with value: -2187.2412109375 and parameters: {'r_scaling': 0.17584871336365315	'unroll': 1	'update_epoch': 15	'discount': 0.9656474754820554	'lr': 0.00033512351049994245	'entropy': 0.011614821197553755}. Best is trial 140 with value: -2331.33544921875. [0m
[32m[I 2022-01-13 03:45:18	301] [0m Trial 142 finished with value: -2254.1962890625 and parameters: {'r_scaling': 0.20625086573201729	'unroll': 1	'update_epoch': 15	'discount': 0.9647226343784728	'lr': 0.00033223590891940573	'entropy': 0.011581893516608557}. Best is trial 140 with value: -2331.33544921875. [0m
[32m[I 2022-01-13 03:47:08	734] [0m Trial 143 finished with value: -2188.834228515625 and parameters: {'r_scaling': 0.1761568345835938	'unroll': 1	'update_epoch': 15	'discount': 0.9649185878917298	'lr': 0.0003271413096053658	'entropy': 0.007581539785340264}. Best is trial 140 with value: -2331.33544921875. [0m
[32m[I 2022-01-13 03:49:18	955] [0m Trial 144 finished with value: -2113.25390625 and parameters: {'r_scaling': 0.17135981689435242	'unroll': 1	'update_epoch': 15	'discount': 0.9646003577437529	'lr': 0.0003316192862815458	'entropy': 0.011472047486456168}. Best is trial 140 with value: -2331.33544921875. [0m
[32m[I 2022-01-13 03:51:29	632] [0m Trial 145 finished with value: 96.67788696289062 and parameters: {'r_scaling': 0.14945061104131996	'unroll': 2	'update_epoch': 15	'discount': 0.9625869582102968	'lr': 0.0003522969371626245	'entropy': 0.00979567736705843}. Best is trial 140 with value: -2331.33544921875. [0m
[32m[I 2022-01-13 03:53:47	717] [0m Trial 146 finished with value: -2299.50146484375 and parameters: {'r_scaling': 0.2390346014901766	'unroll': 1	'update_epoch': 15	'discount': 0.9652903742944727	'lr': 0.00033677339655957306	'entropy': 0.01160590600932749}. Best is trial 140 with value: -2331.33544921875. [0m
[32m[I 2022-01-13 03:55:29	902] [0m Trial 147 finished with value: 102.19972229003906 and parameters: {'r_scaling': 0.2351594553511999	'unroll': 2	'update_epoch': 15	'discount': 0.9652713514834574	'lr': 0.0003304972264568828	'entropy': 0.006104677824153547}. Best is trial 140 with value: -2331.33544921875. [0m
[32m[I 2022-01-13 03:58:02	265] [0m Trial 148 finished with value: -2309.7685546875 and parameters: {'r_scaling': 0.1935363193098586	'unroll': 1	'update_epoch': 15	'discount': 0.9611645049938097	'lr': 0.00030819706723882645	'entropy': 0.012011661840850629}. Best is trial 140 with value: -2331.33544921875. [0m
[32m[I 2022-01-13 03:59:51	082] [0m Trial 149 finished with value: -2156.231689453125 and parameters: {'r_scaling': 0.19708402975203182	'unroll': 1	'update_epoch': 15	'discount': 0.960380791806681	'lr': 0.0003552784251410974	'entropy': 0.01107148811518103}. Best is trial 140 with value: -2331.33544921875. [0m
[32m[I 2022-01-13 04:02:26	213] [0m Trial 150 finished with value: 98.9618911743164 and parameters: {'r_scaling': 0.1929730034748262	'unroll': 12	'update_epoch': 15	'discount': 0.9634247960013976	'lr': 0.0003513301582355506	'entropy': 0.011476913038093296}. Best is trial 140 with value: -2331.33544921875. [0m
[32m[I 2022-01-13 04:05:24	199] [0m Trial 151 finished with value: -2246.58837890625 and parameters: {'r_scaling': 0.21749532104475305	'unroll': 1	'update_epoch': 15	'discount': 0.9602002936586395	'lr': 0.00036775855820903844	'entropy': 0.007279509405630574}. Best is trial 140 with value: -2331.33544921875. [0m
[32m[I 2022-01-13 04:08:21	903] [0m Trial 152 finished with value: -2315.3037109375 and parameters: {'r_scaling': 0.22583666043045122	'unroll': 1	'update_epoch': 15	'discount': 0.9608574402897502	'lr': 0.00036136866230996315	'entropy': 0.00712587306171565}. Best is trial 140 with value: -2331.33544921875. [0m
[32m[I 2022-01-13 04:10:10	005] [0m Trial 153 finished with value: -2282.06005859375 and parameters: {'r_scaling': 0.2253405445190455	'unroll': 1	'update_epoch': 15	'discount': 0.9602641696586335	'lr': 0.00037686872016215017	'entropy': 0.0074305670126455095}. Best is trial 140 with value: -2331.33544921875. [0m
[32m[I 2022-01-13 04:12:00	539] [0m Trial 154 finished with value: -2244.012939453125 and parameters: {'r_scaling': 0.22488544769255342	'unroll': 1	'update_epoch': 15	'discount': 0.9602206826397425	'lr': 0.0003944636188987557	'entropy': 0.005395294812942158}. Best is trial 140 with value: -2331.33544921875. [0m
[32m[I 2022-01-13 04:13:33	934] [0m Trial 155 finished with value: 99.49274444580078 and parameters: {'r_scaling': 0.13933715583471074	'unroll': 2	'update_epoch': 15	'discount': 0.9644783744742744	'lr': 0.0003975978833974279	'entropy': 0.007258396067818885}. Best is trial 140 with value: -2331.33544921875. [0m
[32m[I 2022-01-13 04:15:21	663] [0m Trial 156 finished with value: -2358.99267578125 and parameters: {'r_scaling': 0.22885758412957177	'unroll': 1	'update_epoch': 15	'discount': 0.9695930229684823	'lr': 0.0003719364499068795	'entropy': 0.005289626478327655}. Best is trial 156 with value: -2358.99267578125. [0m
[32m[I 2022-01-13 04:17:54	091] [0m Trial 157 finished with value: 95.26713562011719 and parameters: {'r_scaling': 0.2375030572882867	'unroll': 2	'update_epoch': 15	'discount': 0.9694064887801743	'lr': 0.00037554342160603485	'entropy': 0.007235847118172304}. Best is trial 156 with value: -2358.99267578125. [0m
[32m[I 2022-01-13 04:20:24	049] [0m Trial 158 finished with value: -2225.458984375 and parameters: {'r_scaling': 0.08806395731648113	'unroll': 1	'update_epoch': 15	'discount': 0.9664619401206151	'lr': 0.0003336121876309677	'entropy': 0.004661141869497357}. Best is trial 156 with value: -2358.99267578125. [0m
[32m[I 2022-01-13 04:22:50	889] [0m Trial 159 finished with value: -2118.040283203125 and parameters: {'r_scaling': 0.09135171327778807	'unroll': 1	'update_epoch': 15	'discount': 0.9661655497642452	'lr': 0.0003708791947998404	'entropy': 0.0046723377543519806}. Best is trial 156 with value: -2358.99267578125. [0m
[32m[I 2022-01-13 04:24:25	923] [0m Trial 160 finished with value: 97.17324829101562 and parameters: {'r_scaling': 0.17333482571628317	'unroll': 2	'update_epoch': 15	'discount': 0.9629807658669112	'lr': 0.00033351906348689294	'entropy': 0.005351991601016727}. Best is trial 156 with value: -2358.99267578125. [0m
[32m[I 2022-01-13 04:26:12	598] [0m Trial 161 finished with value: -2316.428955078125 and parameters: {'r_scaling': 0.11515428940957095	'unroll': 1	'update_epoch': 15	'discount': 0.965365583685141	'lr': 0.00032253189565109813	'entropy': 0.005771455769794386}. Best is trial 156 with value: -2358.99267578125. [0m
[32m[I 2022-01-13 04:27:59	308] [0m Trial 162 finished with value: -2159.5390625 and parameters: {'r_scaling': 0.11463240535150175	'unroll': 1	'update_epoch': 14	'discount': 0.9659225439903318	'lr': 0.00038492359713656883	'entropy': 0.005924850991575119}. Best is trial 156 with value: -2358.99267578125. [0m
[32m[I 2022-01-13 04:30:21	996] [0m Trial 163 finished with value: -2200.2529296875 and parameters: {'r_scaling': 0.15632001612231572	'unroll': 1	'update_epoch': 15	'discount': 0.9622678081164162	'lr': 0.0003214502943397541	'entropy': 0.007896502994624218}. Best is trial 156 with value: -2358.99267578125. [0m
[32m[I 2022-01-13 04:32:37	888] [0m Trial 164 finished with value: -2203.644287109375 and parameters: {'r_scaling': 0.09474060159025112	'unroll': 1	'update_epoch': 15	'discount': 0.960668908744967	'lr': 0.0003360048647070071	'entropy': 0.004561616923593664}. Best is trial 156 with value: -2358.99267578125. [0m
[32m[I 2022-01-13 04:35:03	873] [0m Trial 165 finished with value: -2069.12939453125 and parameters: {'r_scaling': 0.09209904219228368	'unroll': 1	'update_epoch': 15	'discount': 0.9613602210814542	'lr': 0.00041097293077926736	'entropy': 0.0041240416891117505}. Best is trial 156 with value: -2358.99267578125. [0m
[32m[I 2022-01-13 04:37:18	530] [0m Trial 166 finished with value: 93.29750061035156 and parameters: {'r_scaling': 0.06281196026909952	'unroll': 2	'update_epoch': 15	'discount': 0.9602798665203192	'lr': 0.0003613536258972568	'entropy': 0.004972849386151585}. Best is trial 156 with value: -2358.99267578125. [0m
[32m[I 2022-01-13 04:39:47	037] [0m Trial 167 finished with value: -2243.3828125 and parameters: {'r_scaling': 0.1289324228470733	'unroll': 1	'update_epoch': 15	'discount': 0.9626934105226641	'lr': 0.0003231357495423912	'entropy': 0.00601579821402918}. Best is trial 156 with value: -2358.99267578125. [0m
[32m[I 2022-01-13 04:41:54	742] [0m Trial 168 finished with value: -2242.130859375 and parameters: {'r_scaling': 0.12812027070484086	'unroll': 1	'update_epoch': 15	'discount': 0.9628042218335231	'lr': 0.0003873688149684994	'entropy': 0.0031924747992238514}. Best is trial 156 with value: -2358.99267578125. [0m
[32m[I 2022-01-13 04:44:00	389] [0m Trial 169 finished with value: -1985.48974609375 and parameters: {'r_scaling': 0.12756176135633723	'unroll': 1	'update_epoch': 14	'discount': 0.968058882479359	'lr': 0.00038547230136328414	'entropy': 0.0033083506627508905}. Best is trial 156 with value: -2358.99267578125. [0m
[32m[I 2022-01-13 04:45:35	884] [0m Trial 170 finished with value: 95.59735107421875 and parameters: {'r_scaling': 0.10274298658947402	'unroll': 2	'update_epoch': 15	'discount': 0.9629620477877675	'lr': 0.00035319459658120846	'entropy': 0.004026665576922237}. Best is trial 156 with value: -2358.99267578125. [0m
[32m[I 2022-01-13 04:47:50	693] [0m Trial 171 finished with value: -2167.537109375 and parameters: {'r_scaling': 0.1482976874517448	'unroll': 1	'update_epoch': 15	'discount': 0.9618944473034928	'lr': 0.0003179523271278218	'entropy': 0.0052285163149494015}. Best is trial 156 with value: -2358.99267578125. [0m
[32m[I 2022-01-13 04:50:00	423] [0m Trial 172 finished with value: -2093.8232421875 and parameters: {'r_scaling': 0.08457437988507849	'unroll': 1	'update_epoch': 15	'discount': 0.9603935531247756	'lr': 0.00034434893283338147	'entropy': 0.006568883339260446}. Best is trial 156 with value: -2358.99267578125. [0m
[32m[I 2022-01-13 04:51:50	827] [0m Trial 173 finished with value: -2195.57666015625 and parameters: {'r_scaling': 0.11880910145676794	'unroll': 1	'update_epoch': 15	'discount': 0.9635212025142601	'lr': 0.0003680520017810326	'entropy': 0.0027727373577304706}. Best is trial 156 with value: -2358.99267578125. [0m
[32m[I 2022-01-13 04:54:18	496] [0m Trial 174 finished with value: -2261.502685546875 and parameters: {'r_scaling': 0.21279679958607875	'unroll': 1	'update_epoch': 14	'discount': 0.9599413072275624	'lr': 0.0004109257042142004	'entropy': 0.005690792514010697}. Best is trial 156 with value: -2358.99267578125. [0m
[32m[I 2022-01-13 04:56:06	260] [0m Trial 175 finished with value: -2288.257568359375 and parameters: {'r_scaling': 0.21537364155196856	'unroll': 1	'update_epoch': 14	'discount': 0.9599101304902429	'lr': 0.0004060936693693744	'entropy': 0.005766887234644454}. Best is trial 156 with value: -2358.99267578125. [0m
[32m[I 2022-01-13 04:58:31	353] [0m Trial 176 finished with value: -1980.36767578125 and parameters: {'r_scaling': 0.13518389446661117	'unroll': 1	'update_epoch': 14	'discount': 0.9672911657233921	'lr': 0.0003928515702263351	'entropy': 0.005988037381706447}. Best is trial 156 with value: -2358.99267578125. [0m
[32m[I 2022-01-13 05:01:15	680] [0m Trial 177 finished with value: -2319.821044921875 and parameters: {'r_scaling': 0.24148721356414043	'unroll': 1	'update_epoch': 14	'discount': 0.9599392410113935	'lr': 0.0004217161225980835	'entropy': 0.0058085093598072585}. Best is trial 156 with value: -2358.99267578125. [0m
[32m[I 2022-01-13 05:03:32	945] [0m Trial 178 finished with value: 97.64926147460938 and parameters: {'r_scaling': 0.22551516312972156	'unroll': 2	'update_epoch': 14	'discount': 0.959342361826564	'lr': 0.00042073992344718834	'entropy': 0.005432954370331608}. Best is trial 156 with value: -2358.99267578125. [0m
[32m[I 2022-01-13 05:05:20	486] [0m Trial 179 finished with value: -2226.72021484375 and parameters: {'r_scaling': 0.2187826836972615	'unroll': 1	'update_epoch': 14	'discount': 0.9593229351868482	'lr': 0.00041439936731755243	'entropy': 0.006397529688505439}. Best is trial 156 with value: -2358.99267578125. [0m
[32m[I 2022-01-13 05:07:40	936] [0m Trial 180 finished with value: -2150.3779296875 and parameters: {'r_scaling': 0.22494764468967038	'unroll': 1	'update_epoch': 14	'discount': 0.9600557653086581	'lr': 0.0004315979865895546	'entropy': 0.006138860814590102}. Best is trial 156 with value: -2358.99267578125. [0m
[32m[I 2022-01-13 05:10:10	812] [0m Trial 181 finished with value: -2138.41552734375 and parameters: {'r_scaling': 0.2167992616643274	'unroll': 1	'update_epoch': 14	'discount': 0.9630133843865553	'lr': 0.00041302125526705957	'entropy': 0.0034816285416257465}. Best is trial 156 with value: -2358.99267578125. [0m
[32m[I 2022-01-13 05:12:35	365] [0m Trial 182 finished with value: -1752.88818359375 and parameters: {'r_scaling': 0.19905714173884767	'unroll': 1	'update_epoch': 14	'discount': 0.9588897072916372	'lr': 0.00039451427357059467	'entropy': 0.004200489146499977}. Best is trial 156 with value: -2358.99267578125. [0m
[32m[I 2022-01-13 05:15:12	125] [0m Trial 183 finished with value: -2241.293701171875 and parameters: {'r_scaling': 0.29399988403083605	'unroll': 1	'update_epoch': 14	'discount': 0.9611723889608249	'lr': 0.0003706141547116737	'entropy': 0.005437176574696417}. Best is trial 156 with value: -2358.99267578125. [0m
[32m[I 2022-01-13 05:17:38	743] [0m Trial 184 finished with value: -2344.334716796875 and parameters: {'r_scaling': 0.318741421787959	'unroll': 1	'update_epoch': 14	'discount': 0.9612331280331838	'lr': 0.0003645500593121059	'entropy': 0.006865152658944693}. Best is trial 156 with value: -2358.99267578125. [0m
[32m[I 2022-01-13 05:20:09	440] [0m Trial 185 finished with value: -2257.132568359375 and parameters: {'r_scaling': 0.30342758526517477	'unroll': 1	'update_epoch': 14	'discount': 0.961421511434522	'lr': 0.00037034473296339375	'entropy': 0.008272875943396742}. Best is trial 156 with value: -2358.99267578125. [0m
[32m[I 2022-01-13 05:22:20	764] [0m Trial 186 finished with value: 99.15876007080078 and parameters: {'r_scaling': 0.2602638870329835	'unroll': 2	'update_epoch': 14	'discount': 0.9557445550563343	'lr': 0.00036955386163307495	'entropy': 0.00898391910948679}. Best is trial 156 with value: -2358.99267578125. [0m
[32m[I 2022-01-13 05:25:13	698] [0m Trial 187 finished with value: -2282.262939453125 and parameters: {'r_scaling': 0.3306175246580922	'unroll': 1	'update_epoch': 15	'discount': 0.9636837759110967	'lr': 0.0003910325244929115	'entropy': 0.00763661235976714}. Best is trial 156 with value: -2358.99267578125. [0m
[32m[I 2022-01-13 05:27:05	610] [0m Trial 188 finished with value: -2227.61572265625 and parameters: {'r_scaling': 0.32408642081712125	'unroll': 1	'update_epoch': 15	'discount': 0.9688912138640234	'lr': 0.0003551575802407504	'entropy': 0.008045472986648993}. Best is trial 156 with value: -2358.99267578125. [0m
[32m[I 2022-01-13 05:29:31	473] [0m Trial 189 finished with value: -2069.9814453125 and parameters: {'r_scaling': 0.2509489588261344	'unroll': 1	'update_epoch': 14	'discount': 0.9641660043255695	'lr': 0.00046993500335118553	'entropy': 0.009605052250401383}. Best is trial 156 with value: -2358.99267578125. [0m
[32m[I 2022-01-13 05:31:34	426] [0m Trial 190 finished with value: 98.37571716308594 and parameters: {'r_scaling': 0.32556531364746805	'unroll': 2	'update_epoch': 15	'discount': 0.9617034280170645	'lr': 0.0003100344177204134	'entropy': 0.0073652820513468945}. Best is trial 156 with value: -2358.99267578125. [0m
[32m[I 2022-01-13 05:33:42	338] [0m Trial 191 finished with value: -2237.140625 and parameters: {'r_scaling': 0.15658152790049765	'unroll': 1	'update_epoch': 15	'discount': 0.9627444001880431	'lr': 0.00039084461108214214	'entropy': 0.006607716751455521}. Best is trial 156 with value: -2358.99267578125. [0m
[32m[I 2022-01-13 05:36:05	977] [0m Trial 192 finished with value: -2208.578369140625 and parameters: {'r_scaling': 0.19680618466713248	'unroll': 1	'update_epoch': 15	'discount': 0.9641930665169512	'lr': 0.00043215389266697913	'entropy': 0.008216006929517575}. Best is trial 156 with value: -2358.99267578125. [0m
[32m[I 2022-01-13 05:38:28	920] [0m Trial 193 finished with value: -2306.420166015625 and parameters: {'r_scaling': 0.28048426371066704	'unroll': 1	'update_epoch': 15	'discount': 0.9580578421336269	'lr': 0.0003779888402073441	'entropy': 0.001972037950407467}. Best is trial 156 with value: -2358.99267578125. [0m
[32m[I 2022-01-13 05:40:55	370] [0m Trial 194 finished with value: -2350.71923828125 and parameters: {'r_scaling': 0.2667147786752464	'unroll': 1	'update_epoch': 14	'discount': 0.9575268348814205	'lr': 0.00036963524953069406	'entropy': 0.007091379152660143}. Best is trial 156 with value: -2358.99267578125. [0m
[32m[I 2022-01-13 05:42:31	671] [0m Trial 195 finished with value: 96.64946746826172 and parameters: {'r_scaling': 0.2913699597983647	'unroll': 5	'update_epoch': 14	'discount': 0.9573253327314712	'lr': 0.000408558575896371	'entropy': 0.0020034293965394533}. Best is trial 156 with value: -2358.99267578125. [0m
[32m[I 2022-01-13 05:45:05	848] [0m Trial 196 finished with value: -2301.6181640625 and parameters: {'r_scaling': 0.2431763594078473	'unroll': 1	'update_epoch': 14	'discount': 0.9554631066281578	'lr': 0.00036137613948691844	'entropy': 0.0013275522527242329}. Best is trial 156 with value: -2358.99267578125. [0m
[32m[I 2022-01-13 05:47:31	057] [0m Trial 197 finished with value: 98.548583984375 and parameters: {'r_scaling': 0.25268105449716405	'unroll': 2	'update_epoch': 14	'discount': 0.9547047546943751	'lr': 0.00035836030682763465	'entropy': 0.009318815978474542}. Best is trial 156 with value: -2358.99267578125. [0m
[32m[I 2022-01-13 05:49:53	417] [0m Trial 198 finished with value: -2246.87255859375 and parameters: {'r_scaling': 0.3467088319269323	'unroll': 1	'update_epoch': 14	'discount': 0.9562949677012618	'lr': 0.0003694849405823213	'entropy': 0.001440643674124237}. Best is trial 156 with value: -2358.99267578125. [0m
[32m[I 2022-01-13 05:52:10	543] [0m Trial 199 finished with value: -2240.35693359375 and parameters: {'r_scaling': 0.3453991090169826	'unroll': 1	'update_epoch': 14	'discount': 0.9568148481776511	'lr': 0.00034681590713354286	'entropy': 0.001206973815078263}. Best is trial 156 with value: -2358.99267578125. [0m
