# Supplementary material
Source: ML conference proceedings conference paper supplement (https://proceedings.neurips.cc/paper_files/paper/2022/hash/10a6bdcabbd5a3d36b760daa295f63c1-Abstract.html)
Supplement: Supplementary file 1 [file 10a6bdcabbd5a3d36b760daa295f63c1-Supplemental-Conference.zip › neurips2022/code/robotics_code/hp_searches/ant_2,5M.log]

[32m[I 2022-01-12 15:46:46	020] [0m A new study created in memory with name: no-name-8c2433a9-aeed-4600-84d8-a98cb9b474dd [0m
[32m[I 2022-01-12 15:48:32	243] [0m Trial 0 finished with value: 97.58322143554688 and parameters: {'r_scaling': 75.97549413944839	'unroll': 5	'update_epoch': 13	'discount': 0.9593613810379825	'lr': 0.0006751269922613721	'entropy': 0.004439308836435828}. Best is trial 0 with value: 97.58322143554688. [0m
[32m[I 2022-01-12 15:50:15	817] [0m Trial 1 finished with value: 94.51649475097656 and parameters: {'r_scaling': 0.06796638151535932	'unroll': 5	'update_epoch': 14	'discount': 0.9672317591724742	'lr': 0.0010747429133863336	'entropy': 0.03042427956447899}. Best is trial 1 with value: 94.51649475097656. [0m
[32m[I 2022-01-12 15:52:12	016] [0m Trial 2 finished with value: 97.9650650024414 and parameters: {'r_scaling': 26.35682345225327	'unroll': 2	'update_epoch': 10	'discount': 0.9065075194932467	'lr': 0.0015537355360629613	'entropy': 0.00020655125163520694}. Best is trial 1 with value: 94.51649475097656. [0m
[32m[I 2022-01-12 15:54:05	434] [0m Trial 3 finished with value: 94.42094421386719 and parameters: {'r_scaling': 98.76882531265554	'unroll': 15	'update_epoch': 4	'discount': 0.972786547341729	'lr': 0.0013951888078229907	'entropy': 0.007371525155383054}. Best is trial 3 with value: 94.42094421386719. [0m
[32m[I 2022-01-12 15:56:12	548] [0m Trial 4 finished with value: -2202.932861328125 and parameters: {'r_scaling': 17.538155806459756	'unroll': 1	'update_epoch': 8	'discount': 0.901602383322076	'lr': 0.0003427473966264365	'entropy': 0.0010499444763905914}. Best is trial 4 with value: -2202.932861328125. [0m
[32m[I 2022-01-12 15:58:21	528] [0m Trial 5 finished with value: 101.62996673583984 and parameters: {'r_scaling': 7.360262293810004	'unroll': 12	'update_epoch': 13	'discount': 0.9855037635739672	'lr': 0.0013509933842066636	'entropy': 0.06486059147168237}. Best is trial 4 with value: -2202.932861328125. [0m
[32m[I 2022-01-12 16:00:36	078] [0m Trial 6 finished with value: 93.83877563476562 and parameters: {'r_scaling': 120.81011095715246	'unroll': 5	'update_epoch': 14	'discount': 0.9916102256495958	'lr': 0.0001994155827539268	'entropy': 0.01625463509596538}. Best is trial 4 with value: -2202.932861328125. [0m
[32m[I 2022-01-12 16:02:51	518] [0m Trial 7 finished with value: 106.91976928710938 and parameters: {'r_scaling': 3.8364900505370265	'unroll': 2	'update_epoch': 1	'discount': 0.9396956296252672	'lr': 0.0014815192628891702	'entropy': 0.00027523613486394856}. Best is trial 4 with value: -2202.932861328125. [0m
[32m[I 2022-01-12 16:04:56	805] [0m Trial 8 finished with value: -933.13720703125 and parameters: {'r_scaling': 11.114642188790603	'unroll': 2	'update_epoch': 3	'discount': 0.9737334675543353	'lr': 0.0002719410587543662	'entropy': 0.06224384716746356}. Best is trial 4 with value: -2202.932861328125. [0m
[32m[I 2022-01-12 16:07:08	761] [0m Trial 9 finished with value: 99.09196472167969 and parameters: {'r_scaling': 2.367734313554153	'unroll': 6	'update_epoch': 3	'discount': 0.9333453586634379	'lr': 0.0015685482691489732	'entropy': 0.005778556506739111}. Best is trial 4 with value: -2202.932861328125. [0m
[32m[I 2022-01-12 16:09:26	154] [0m Trial 10 finished with value: 98.83859252929688 and parameters: {'r_scaling': 0.8710634828701777	'unroll': 10	'update_epoch': 8	'discount': 0.9001979468293372	'lr': 0.00012141624559092867	'entropy': 0.0008737573234259893}. Best is trial 4 with value: -2202.932861328125. [0m
[32m[I 2022-01-12 16:11:55	544] [0m Trial 11 finished with value: -2341.54345703125 and parameters: {'r_scaling': 16.714009987789304	'unroll': 1	'update_epoch': 7	'discount': 0.9214876314413676	'lr': 0.0003026520750396634	'entropy': 0.0008872612124178349}. Best is trial 11 with value: -2341.54345703125. [0m
[32m[I 2022-01-12 16:13:49	130] [0m Trial 12 finished with value: -2171.8486328125 and parameters: {'r_scaling': 24.555119799226002	'unroll': 1	'update_epoch': 7	'discount': 0.9204358127711553	'lr': 0.0004056142749524104	'entropy': 0.0008244699840810518}. Best is trial 11 with value: -2341.54345703125. [0m
[32m[I 2022-01-12 16:16:03	835] [0m Trial 13 finished with value: 98.71427917480469 and parameters: {'r_scaling': 0.7456391384522644	'unroll': 8	'update_epoch': 10	'discount': 0.9175592906982241	'lr': 0.0004609194131802673	'entropy': 0.0013505940172782772}. Best is trial 11 with value: -2341.54345703125. [0m
[32m[I 2022-01-12 16:18:28	890] [0m Trial 14 finished with value: -1667.4986572265625 and parameters: {'r_scaling': 26.31414083769111	'unroll': 3	'update_epoch': 6	'discount': 0.9199379684892646	'lr': 0.0002052000309430038	'entropy': 0.00010766975557261226}. Best is trial 11 with value: -2341.54345703125. [0m
[32m[I 2022-01-12 16:20:53	391] [0m Trial 15 finished with value: 99.66185760498047 and parameters: {'r_scaling': 1.3964260421708974	'unroll': 8	'update_epoch': 10	'discount': 0.9088718842593523	'lr': 0.0003699777496236645	'entropy': 0.0016117043364904592}. Best is trial 11 with value: -2341.54345703125. [0m
[32m[I 2022-01-12 16:22:24	871] [0m Trial 16 finished with value: 96.74858093261719 and parameters: {'r_scaling': 9.251834865199756	'unroll': 4	'update_epoch': 5	'discount': 0.9318686918159803	'lr': 0.0007129917704190843	'entropy': 0.00044127752399980146}. Best is trial 11 with value: -2341.54345703125. [0m
[32m[I 2022-01-12 16:24:54	797] [0m Trial 17 finished with value: -2971.6318359375 and parameters: {'r_scaling': 0.20528053621066186	'unroll': 1	'update_epoch': 9	'discount': 0.9535326747502886	'lr': 0.00010340889819121668	'entropy': 0.002744004188374666}. Best is trial 17 with value: -2971.6318359375. [0m
[32m[I 2022-01-12 16:26:28	720] [0m Trial 18 finished with value: 101.70549011230469 and parameters: {'r_scaling': 0.1843474495557859	'unroll': 7	'update_epoch': 11	'discount': 0.9509934916481088	'lr': 0.00011701860865052309	'entropy': 0.0025760151133587153}. Best is trial 17 with value: -2971.6318359375. [0m
[32m[I 2022-01-12 16:28:08	050] [0m Trial 19 finished with value: 97.76222229003906 and parameters: {'r_scaling': 0.28185964014101883	'unroll': 10	'update_epoch': 8	'discount': 0.9495595423093729	'lr': 0.00015054747967505546	'entropy': 0.010048877404778249}. Best is trial 17 with value: -2971.6318359375. [0m
[32m[I 2022-01-12 16:30:05	262] [0m Trial 20 finished with value: -2098.468017578125 and parameters: {'r_scaling': 0.060266607820436524	'unroll': 3	'update_epoch': 12	'discount': 0.9412340267563108	'lr': 0.0001005512402886992	'entropy': 0.0025250565431526604}. Best is trial 17 with value: -2971.6318359375. [0m
[32m[I 2022-01-12 16:32:34	903] [0m Trial 21 finished with value: -2001.7222900390625 and parameters: {'r_scaling': 48.93655041809012	'unroll': 1	'update_epoch': 9	'discount': 0.9290053878348135	'lr': 0.00028611914679782367	'entropy': 0.0005702202567935485}. Best is trial 17 with value: -2971.6318359375. [0m
[32m[I 2022-01-12 16:35:09	098] [0m Trial 22 finished with value: -1631.346435546875 and parameters: {'r_scaling': 4.989693303803035	'unroll': 1	'update_epoch': 7	'discount': 0.9150077357091156	'lr': 0.0006658019928196293	'entropy': 0.0027871134875188017}. Best is trial 17 with value: -2971.6318359375. [0m
[32m[I 2022-01-12 16:37:36	052] [0m Trial 23 finished with value: -1731.2633056640625 and parameters: {'r_scaling': 18.382545595100524	'unroll': 3	'update_epoch': 6	'discount': 0.9571575440511534	'lr': 0.00018763323280327748	'entropy': 0.0013003857479370405}. Best is trial 17 with value: -2971.6318359375. [0m
[32m[I 2022-01-12 16:39:35	338] [0m Trial 24 finished with value: -2230.00634765625 and parameters: {'r_scaling': 2.188170847514343	'unroll': 1	'update_epoch': 8	'discount': 0.9001353847584471	'lr': 0.0002806731466148314	'entropy': 0.0004923741323893672}. Best is trial 17 with value: -2971.6318359375. [0m
[32m[I 2022-01-12 16:41:52	008] [0m Trial 25 finished with value: 97.49607849121094 and parameters: {'r_scaling': 0.3247877653585302	'unroll': 4	'update_epoch': 9	'discount': 0.9276038697218215	'lr': 0.0005375075908316719	'entropy': 0.00037876514630579217}. Best is trial 17 with value: -2971.6318359375. [0m
[32m[I 2022-01-12 16:44:22	098] [0m Trial 26 finished with value: 97.59294128417969 and parameters: {'r_scaling': 0.13267282348788267	'unroll': 15	'update_epoch': 6	'discount': 0.9104547440244448	'lr': 0.00025390020001078077	'entropy': 0.00014912767878266846}. Best is trial 17 with value: -2971.6318359375. [0m
[32m[I 2022-01-12 16:46:53	991] [0m Trial 27 finished with value: -2255.587890625 and parameters: {'r_scaling': 1.902717883776731	'unroll': 3	'update_epoch': 11	'discount': 0.9425844083837728	'lr': 0.00014864601910207314	'entropy': 0.0005649564734109675}. Best is trial 17 with value: -2971.6318359375. [0m
[32m[I 2022-01-12 16:49:20	039] [0m Trial 28 finished with value: 96.588134765625 and parameters: {'r_scaling': 0.5321184274560521	'unroll': 4	'update_epoch': 11	'discount': 0.9426819841650429	'lr': 0.0001475453263635916	'entropy': 0.0018503806423463241}. Best is trial 17 with value: -2971.6318359375. [0m
[32m[I 2022-01-12 16:51:46	713] [0m Trial 29 finished with value: 94.01314544677734 and parameters: {'r_scaling': 52.007466937678565	'unroll': 6	'update_epoch': 12	'discount': 0.9578424682062531	'lr': 0.00014615455958726906	'entropy': 0.004297303243485894}. Best is trial 17 with value: -2971.6318359375. [0m
[32m[I 2022-01-12 16:53:47	664] [0m Trial 30 finished with value: -2276.72998046875 and parameters: {'r_scaling': 0.0937815617936863	'unroll': 3	'update_epoch': 15	'discount': 0.9663550435816585	'lr': 0.00017553941310025276	'entropy': 0.0007107117966067069}. Best is trial 17 with value: -2971.6318359375. [0m
[32m[I 2022-01-12 16:55:46	375] [0m Trial 31 finished with value: -2416.954833984375 and parameters: {'r_scaling': 0.11609508923259255	'unroll': 3	'update_epoch': 15	'discount': 0.9648285207360175	'lr': 0.00017014856942661495	'entropy': 0.0006305586526964526}. Best is trial 17 with value: -2971.6318359375. [0m
[32m[I 2022-01-12 16:57:41	349] [0m Trial 32 finished with value: -2502.72607421875 and parameters: {'r_scaling': 0.09460900724807024	'unroll': 2	'update_epoch': 15	'discount': 0.9729102809402221	'lr': 0.00010124497471668827	'entropy': 0.0006974108722803192}. Best is trial 17 with value: -2971.6318359375. [0m
[32m[I 2022-01-12 16:59:39	000] [0m Trial 33 finished with value: -2453.137939453125 and parameters: {'r_scaling': 0.10689862795400513	'unroll': 2	'update_epoch': 15	'discount': 0.9653990149149424	'lr': 0.0001033829508725283	'entropy': 0.0002576479856800739}. Best is trial 17 with value: -2971.6318359375. [0m
[32m[I 2022-01-12 17:02:00	192] [0m Trial 34 finished with value: -2518.30126953125 and parameters: {'r_scaling': 0.11351038757238315	'unroll': 2	'update_epoch': 15	'discount': 0.9789366067170526	'lr': 0.00010681145150263123	'entropy': 0.00025098956616073084}. Best is trial 17 with value: -2971.6318359375. [0m
[32m[I 2022-01-12 17:04:23	231] [0m Trial 35 finished with value: 96.81797790527344 and parameters: {'r_scaling': 0.051616357804039795	'unroll': 5	'update_epoch': 14	'discount': 0.9765455291240329	'lr': 0.00011301895418131058	'entropy': 0.00023660002590579265}. Best is trial 17 with value: -2971.6318359375. [0m
[32m[I 2022-01-12 17:06:45	248] [0m Trial 36 finished with value: -2402.76904296875 and parameters: {'r_scaling': 0.21564141007163473	'unroll': 2	'update_epoch': 13	'discount': 0.980413813083754	'lr': 0.00010534140027928008	'entropy': 0.00016546010875157928}. Best is trial 17 with value: -2971.6318359375. [0m
[32m[I 2022-01-12 17:09:09	263] [0m Trial 37 finished with value: -2030.395751953125 and parameters: {'r_scaling': 0.4403283168835191	'unroll': 2	'update_epoch': 14	'discount': 0.9873007812956658	'lr': 0.00012986686068938044	'entropy': 0.00030864115227356053}. Best is trial 17 with value: -2971.6318359375. [0m
[32m[I 2022-01-12 17:11:33	561] [0m Trial 38 finished with value: 98.88262939453125 and parameters: {'r_scaling': 0.09614757902551258	'unroll': 4	'update_epoch': 15	'discount': 0.9681681616932156	'lr': 0.00023400289812879177	'entropy': 0.00011004339973936958}. Best is trial 17 with value: -2971.6318359375. [0m
[32m[I 2022-01-12 17:14:07	632] [0m Trial 39 finished with value: 97.46951293945312 and parameters: {'r_scaling': 0.20589640408034485	'unroll': 13	'update_epoch': 14	'discount': 0.9947909594830566	'lr': 0.00013302899851297094	'entropy': 0.00020214236466685643}. Best is trial 17 with value: -2971.6318359375. [0m
[32m[I 2022-01-12 17:16:39	674] [0m Trial 40 finished with value: -1530.873779296875 and parameters: {'r_scaling': 0.08130692980197933	'unroll': 2	'update_epoch': 13	'discount': 0.9614769426061588	'lr': 0.00010069067381119106	'entropy': 0.021677399693518815}. Best is trial 17 with value: -2971.6318359375. [0m
[32m[I 2022-01-12 17:18:46	620] [0m Trial 41 finished with value: -2473.9228515625 and parameters: {'r_scaling': 0.14081990309852052	'unroll': 2	'update_epoch': 15	'discount': 0.9639120045277129	'lr': 0.00015949140993386034	'entropy': 0.0003443772919475755}. Best is trial 17 with value: -2971.6318359375. [0m
[32m[I 2022-01-12 17:21:17	448] [0m Trial 42 finished with value: -2613.248779296875 and parameters: {'r_scaling': 0.1731848046858589	'unroll': 2	'update_epoch': 15	'discount': 0.9796577846952148	'lr': 0.00012305842018318414	'entropy': 0.0002611320529441025}. Best is trial 17 with value: -2971.6318359375. [0m
[32m[I 2022-01-12 17:22:56	294] [0m Trial 43 finished with value: 96.63555908203125 and parameters: {'r_scaling': 0.15194691066254432	'unroll': 5	'update_epoch': 12	'discount': 0.9782140709635203	'lr': 0.00012882776433970145	'entropy': 0.00015769982458191804}. Best is trial 17 with value: -2971.6318359375. [0m
[32m[I 2022-01-12 17:25:32	634] [0m Trial 44 finished with value: -2375.037353515625 and parameters: {'r_scaling': 0.2965426919879187	'unroll': 2	'update_epoch': 14	'discount': 0.9837628900800506	'lr': 0.000168726964146731	'entropy': 0.0003409639184418315}. Best is trial 17 with value: -2971.6318359375. [0m
[32m[I 2022-01-12 17:28:10	562] [0m Trial 45 finished with value: -3828.1748046875 and parameters: {'r_scaling': 0.06650637165309856	'unroll': 1	'update_epoch': 13	'discount': 0.9717237592451693	'lr': 0.0001232581042918646	'entropy': 0.003905971922018139}. Best is trial 45 with value: -3828.1748046875. [0m
[32m[I 2022-01-12 17:30:45	183] [0m Trial 46 finished with value: -3002.575927734375 and parameters: {'r_scaling': 0.0707640614453254	'unroll': 1	'update_epoch': 13	'discount': 0.9713759126935216	'lr': 0.00020531438144113	'entropy': 0.015082655073671807}. Best is trial 45 with value: -3828.1748046875. [0m
[32m[I 2022-01-12 17:32:54	201] [0m Trial 47 finished with value: -3328.714111328125 and parameters: {'r_scaling': 0.07228697822402627	'unroll': 1	'update_epoch': 13	'discount': 0.969689812427732	'lr': 0.00022071178368966452	'entropy': 0.007663032267121418}. Best is trial 45 with value: -3828.1748046875. [0m
[32m[I 2022-01-12 17:35:22	965] [0m Trial 48 finished with value: -2711.528564453125 and parameters: {'r_scaling': 0.06245173118707411	'unroll': 1	'update_epoch': 13	'discount': 0.9700428896033295	'lr': 0.00024015549707617084	'entropy': 0.010156215240474798}. Best is trial 45 with value: -3828.1748046875. [0m
[32m[I 2022-01-12 17:37:48	292] [0m Trial 49 finished with value: -3713.309814453125 and parameters: {'r_scaling': 0.06866909251476114	'unroll': 1	'update_epoch': 13	'discount': 0.9548388119878211	'lr': 0.00021768822222405045	'entropy': 0.010000999516861073}. Best is trial 45 with value: -3828.1748046875. [0m
[32m[I 2022-01-12 17:39:50	436] [0m Trial 50 finished with value: -192.01504516601562 and parameters: {'r_scaling': 0.06713011770309248	'unroll': 1	'update_epoch': 12	'discount': 0.9524161436922279	'lr': 0.00021867392101217507	'entropy': 0.044069212075161956}. Best is trial 45 with value: -3828.1748046875. [0m
[32m[I 2022-01-12 17:42:12	817] [0m Trial 51 finished with value: -3145.7412109375 and parameters: {'r_scaling': 0.05720012784931593	'unroll': 1	'update_epoch': 13	'discount': 0.9703149357876579	'lr': 0.0002378064316998991	'entropy': 0.010770216178816159}. Best is trial 45 with value: -3828.1748046875. [0m
[32m[I 2022-01-12 17:44:32	056] [0m Trial 52 finished with value: -3019.163330078125 and parameters: {'r_scaling': 0.07095050835904125	'unroll': 1	'update_epoch': 13	'discount': 0.9535022669728798	'lr': 0.00032182309383249543	'entropy': 0.007349381814506436}. Best is trial 45 with value: -3828.1748046875. [0m
[32m[I 2022-01-12 17:46:51	691] [0m Trial 53 finished with value: -1430.8292236328125 and parameters: {'r_scaling': 0.0564946445499593	'unroll': 1	'update_epoch': 13	'discount': 0.9464999101544508	'lr': 0.000326068762101169	'entropy': 0.014135426781674473}. Best is trial 45 with value: -3828.1748046875. [0m
[32m[I 2022-01-12 17:49:16	788] [0m Trial 54 finished with value: -3043.4990234375 and parameters: {'r_scaling': 0.07886125918137517	'unroll': 1	'update_epoch': 12	'discount': 0.9605737361576724	'lr': 0.00036855703332653683	'entropy': 0.006622404906800627}. Best is trial 45 with value: -3828.1748046875. [0m
[32m[I 2022-01-12 17:51:25	050] [0m Trial 55 finished with value: 96.20307922363281 and parameters: {'r_scaling': 0.05303543297263404	'unroll': 9	'update_epoch': 12	'discount': 0.9554005911220504	'lr': 0.001987483840803363	'entropy': 0.0056883592860585835}. Best is trial 45 with value: -3828.1748046875. [0m
[32m[I 2022-01-12 17:53:57	067] [0m Trial 56 finished with value: -2816.98291015625 and parameters: {'r_scaling': 0.07454446634626274	'unroll': 1	'update_epoch': 11	'discount': 0.9606389248919033	'lr': 0.0003949854445757208	'entropy': 0.007742986650868644}. Best is trial 45 with value: -3828.1748046875. [0m
[32m[I 2022-01-12 17:56:24	602] [0m Trial 57 finished with value: -2488.24658203125 and parameters: {'r_scaling': 0.4412680280358655	'unroll': 3	'update_epoch': 14	'discount': 0.9485512770910058	'lr': 0.000336787269039332	'entropy': 0.004110012125658568}. Best is trial 45 with value: -3828.1748046875. [0m
[32m[I 2022-01-12 17:58:46	317] [0m Trial 58 finished with value: 95.41800689697266 and parameters: {'r_scaling': 0.05023920123474894	'unroll': 13	'update_epoch': 12	'discount': 0.974770754342116	'lr': 0.0004473081251933037	'entropy': 0.022395337549023665}. Best is trial 45 with value: -3828.1748046875. [0m
[32m[I 2022-01-12 18:01:18	088] [0m Trial 59 finished with value: -2704.015869140625 and parameters: {'r_scaling': 0.2449660926645855	'unroll': 3	'update_epoch': 10	'discount': 0.9552366252217209	'lr': 0.0005114638895384958	'entropy': 0.009663410107571345}. Best is trial 45 with value: -3828.1748046875. [0m
[32m[I 2022-01-12 18:03:20	364] [0m Trial 60 finished with value: -3136.802490234375 and parameters: {'r_scaling': 1.0704657610010822	'unroll': 1	'update_epoch': 13	'discount': 0.9615722048779028	'lr': 0.0002616723867062834	'entropy': 0.006966601459431642}. Best is trial 45 with value: -3828.1748046875. [0m
[32m[I 2022-01-12 18:05:54	849] [0m Trial 61 finished with value: -3231.173095703125 and parameters: {'r_scaling': 1.248010886777509	'unroll': 1	'update_epoch': 13	'discount': 0.9617898583059559	'lr': 0.0002621779294982241	'entropy': 0.005589107604595681}. Best is trial 45 with value: -3828.1748046875. [0m
[32m[I 2022-01-12 18:08:32	811] [0m Trial 62 finished with value: -3159.908447265625 and parameters: {'r_scaling': 0.8302137982363773	'unroll': 1	'update_epoch': 14	'discount': 0.9618691729117133	'lr': 0.0002730260695302128	'entropy': 0.005722097712490688}. Best is trial 45 with value: -3828.1748046875. [0m
[32m[I 2022-01-12 18:11:07	781] [0m Trial 63 finished with value: -3209.984375 and parameters: {'r_scaling': 1.213501257274983	'unroll': 1	'update_epoch': 14	'discount': 0.9633871280615599	'lr': 0.0002570511346261641	'entropy': 0.012301588933351065}. Best is trial 45 with value: -3828.1748046875. [0m
[32m[I 2022-01-12 18:13:24	175] [0m Trial 64 finished with value: -2081.7060546875 and parameters: {'r_scaling': 3.3042326418740493	'unroll': 2	'update_epoch': 14	'discount': 0.9693464579341224	'lr': 0.00019021225058360613	'entropy': 0.003469470847763177}. Best is trial 45 with value: -3828.1748046875. [0m
[32m[I 2022-01-12 18:15:37	721] [0m Trial 65 finished with value: 94.17391967773438 and parameters: {'r_scaling': 1.4983267962127742	'unroll': 4	'update_epoch': 14	'discount': 0.9579954932990014	'lr': 0.0002968977379235724	'entropy': 0.005184724375007663}. Best is trial 45 with value: -3828.1748046875. [0m
[32m[I 2022-01-12 18:17:59	740] [0m Trial 66 finished with value: -2471.656005859375 and parameters: {'r_scaling': 0.7572882062343415	'unroll': 2	'update_epoch': 13	'discount': 0.9637814276547673	'lr': 0.00022695388310742636	'entropy': 0.010853565195926168}. Best is trial 45 with value: -3828.1748046875. [0m
[32m[I 2022-01-12 18:19:58	805] [0m Trial 67 finished with value: -393.4072265625 and parameters: {'r_scaling': 181.68594364874767	'unroll': 1	'update_epoch': 2	'discount': 0.9743345475891042	'lr': 0.0002559508556280232	'entropy': 0.020950996126100047}. Best is trial 45 with value: -3828.1748046875. [0m
[32m[I 2022-01-12 18:21:59	208] [0m Trial 68 finished with value: -1910.69287109375 and parameters: {'r_scaling': 4.610677688567836	'unroll': 3	'update_epoch': 14	'discount': 0.9694741857823039	'lr': 0.00020967324176832266	'entropy': 0.012834302101235144}. Best is trial 45 with value: -3828.1748046875. [0m
[32m[I 2022-01-12 18:24:21	257] [0m Trial 69 finished with value: 97.1601333618164 and parameters: {'r_scaling': 1.1603872145519152	'unroll': 11	'update_epoch': 11	'discount': 0.9826725055274057	'lr': 0.0008622283544311711	'entropy': 0.00205658442430824}. Best is trial 45 with value: -3828.1748046875. [0m
[32m[I 2022-01-12 18:26:48	091] [0m Trial 70 finished with value: 97.7446517944336 and parameters: {'r_scaling': 2.7152203090921807	'unroll': 6	'update_epoch': 12	'discount': 0.9672552168077417	'lr': 0.0001839465259569118	'entropy': 0.008458011770746192}. Best is trial 45 with value: -3828.1748046875. [0m
[32m[I 2022-01-12 18:29:34	442] [0m Trial 71 finished with value: -3164.533935546875 and parameters: {'r_scaling': 0.9994811645462415	'unroll': 1	'update_epoch': 13	'discount': 0.9626121579280076	'lr': 0.0002651805419127897	'entropy': 0.003597024288283951}. Best is trial 45 with value: -3828.1748046875. [0m
[32m[I 2022-01-12 18:31:48	865] [0m Trial 72 finished with value: -2893.87744140625 and parameters: {'r_scaling': 0.6291203142876844	'unroll': 1	'update_epoch': 14	'discount': 0.9636989493250765	'lr': 0.0002784306399286095	'entropy': 0.0034773576022572223}. Best is trial 45 with value: -3828.1748046875. [0m
[32m[I 2022-01-12 18:33:50	038] [0m Trial 73 finished with value: -2489.693115234375 and parameters: {'r_scaling': 0.9839317299662064	'unroll': 2	'update_epoch': 13	'discount': 0.9724848408464914	'lr': 0.00030068034174981123	'entropy': 0.0051648429486376175}. Best is trial 45 with value: -3828.1748046875. [0m
[32m[I 2022-01-12 18:35:55	454] [0m Trial 74 finished with value: -3297.390625 and parameters: {'r_scaling': 1.6881215227262614	'unroll': 1	'update_epoch': 13	'discount': 0.9556356491283762	'lr': 0.0002468365453291625	'entropy': 0.031605361486831705}. Best is trial 45 with value: -3828.1748046875. [0m
[32m[I 2022-01-12 18:37:56	690] [0m Trial 75 finished with value: -2447.0673828125 and parameters: {'r_scaling': 1.672266672737083	'unroll': 3	'update_epoch': 10	'discount': 0.956591303597258	'lr': 0.00036638138626769983	'entropy': 0.0817563594211962}. Best is trial 45 with value: -3828.1748046875. [0m
[32m[I 2022-01-12 18:40:17	524] [0m Trial 76 finished with value: -2324.052734375 and parameters: {'r_scaling': 1.2777161812490387	'unroll': 2	'update_epoch': 11	'discount': 0.9497335707430031	'lr': 0.00025460760864416947	'entropy': 0.018207869233539255}. Best is trial 45 with value: -3828.1748046875. [0m
[32m[I 2022-01-12 18:42:51	551] [0m Trial 77 finished with value: -2937.182861328125 and parameters: {'r_scaling': 5.985246301132292	'unroll': 1	'update_epoch': 14	'discount': 0.9377610377403592	'lr': 0.0001963592052733592	'entropy': 0.03198461202167291}. Best is trial 45 with value: -3828.1748046875. [0m
[32m[I 2022-01-12 18:45:09	865] [0m Trial 78 finished with value: -2129.52294921875 and parameters: {'r_scaling': 2.1526258817043633	'unroll': 2	'update_epoch': 13	'discount': 0.9589436526004635	'lr': 0.00022201288169837143	'entropy': 0.00423832350418831}. Best is trial 45 with value: -3828.1748046875. [0m
[32m[I 2022-01-12 18:47:10	394] [0m Trial 79 finished with value: -3355.89990234375 and parameters: {'r_scaling': 0.7740112790095448	'unroll': 1	'update_epoch': 12	'discount': 0.9450879355525637	'lr': 0.0002789611071320534	'entropy': 0.028111192244889185}. Best is trial 45 with value: -3828.1748046875. [0m
[32m[I 2022-01-12 18:49:25	875] [0m Trial 80 finished with value: -2672.12353515625 and parameters: {'r_scaling': 0.6070044492340361	'unroll': 2	'update_epoch': 12	'discount': 0.9461280558908859	'lr': 0.0004130932748186199	'entropy': 0.029755382845232894}. Best is trial 45 with value: -3828.1748046875. [0m
[32m[I 2022-01-12 18:51:48	699] [0m Trial 81 finished with value: -2617.55029296875 and parameters: {'r_scaling': 0.434243770402658	'unroll': 1	'update_epoch': 14	'discount': 0.9363463891425833	'lr': 0.000274958297202777	'entropy': 0.0540881975463409}. Best is trial 45 with value: -3828.1748046875. [0m
[32m[I 2022-01-12 18:54:19	214] [0m Trial 82 finished with value: -3176.672607421875 and parameters: {'r_scaling': 0.8567380494113626	'unroll': 1	'update_epoch': 12	'discount': 0.9525706491763434	'lr': 0.00031926100865410417	'entropy': 0.02949610641470347}. Best is trial 45 with value: -3828.1748046875. [0m
[32m[I 2022-01-12 18:56:31	358] [0m Trial 83 finished with value: -2596.9609375 and parameters: {'r_scaling': 1.5527319425541135	'unroll': 2	'update_epoch': 12	'discount': 0.9458226662724053	'lr': 0.00032346398101085666	'entropy': 0.02871007531057486}. Best is trial 45 with value: -3828.1748046875. [0m
[32m[I 2022-01-12 18:58:50	885] [0m Trial 84 finished with value: -3310.454833984375 and parameters: {'r_scaling': 3.515737044412371	'unroll': 1	'update_epoch': 11	'discount': 0.9532262336365428	'lr': 0.00024215868703166904	'entropy': 0.046748151831081095}. Best is trial 45 with value: -3828.1748046875. [0m
[32m[I 2022-01-12 19:01:07	988] [0m Trial 85 finished with value: -2892.78369140625 and parameters: {'r_scaling': 10.212901020852827	'unroll': 1	'update_epoch': 11	'discount': 0.9509551481850443	'lr': 0.0002432900120669404	'entropy': 0.03793175924614653}. Best is trial 45 with value: -3828.1748046875. [0m
[32m[I 2022-01-12 19:03:22	360] [0m Trial 86 finished with value: -2397.648193359375 and parameters: {'r_scaling': 2.6535540181714694	'unroll': 3	'update_epoch': 12	'discount': 0.9439278562292472	'lr': 0.0003091833534005295	'entropy': 0.09813527066608745}. Best is trial 45 with value: -3828.1748046875. [0m
[32m[I 2022-01-12 19:05:35	015] [0m Trial 87 finished with value: -1925.046142578125 and parameters: {'r_scaling': 7.964101432947272	'unroll': 2	'update_epoch': 11	'discount': 0.9536350767171728	'lr': 0.00020711673691459038	'entropy': 0.06316184164320937}. Best is trial 45 with value: -3828.1748046875. [0m
[32m[I 2022-01-12 19:08:04	919] [0m Trial 88 finished with value: -2565.88330078125 and parameters: {'r_scaling': 0.36124648109355995	'unroll': 1	'update_epoch': 13	'discount': 0.9396101528607431	'lr': 0.00017674746574626777	'entropy': 0.05131206405255582}. Best is trial 45 with value: -3828.1748046875. [0m
[32m[I 2022-01-12 19:10:11	692] [0m Trial 89 finished with value: 91.58222961425781 and parameters: {'r_scaling': 3.5062214669316427	'unroll': 7	'update_epoch': 12	'discount': 0.9666283002880283	'lr': 0.0002211447049509148	'entropy': 0.03711922651982705}. Best is trial 45 with value: -3828.1748046875. [0m
[32m[I 2022-01-12 19:12:27	698] [0m Trial 90 finished with value: -1990.979736328125 and parameters: {'r_scaling': 2.133119930065762	'unroll': 2	'update_epoch': 9	'discount': 0.9513506936841499	'lr': 0.00016149525844734257	'entropy': 0.025610469712520276}. Best is trial 45 with value: -3828.1748046875. [0m
[32m[I 2022-01-12 19:14:55	878] [0m Trial 91 finished with value: -3156.97021484375 and parameters: {'r_scaling': 0.9830305931816232	'unroll': 1	'update_epoch': 13	'discount': 0.9552817655863911	'lr': 0.00028879281903797656	'entropy': 0.013471765469133055}. Best is trial 45 with value: -3828.1748046875. [0m
[32m[I 2022-01-12 19:16:58	330] [0m Trial 92 finished with value: -3333.437255859375 and parameters: {'r_scaling': 0.7248418210045104	'unroll': 1	'update_epoch': 13	'discount': 0.9594806583243483	'lr': 0.0003475797133528841	'entropy': 0.017150917369276913}. Best is trial 45 with value: -3828.1748046875. [0m
[32m[I 2022-01-12 19:19:23	857] [0m Trial 93 finished with value: -3097.603515625 and parameters: {'r_scaling': 0.6403561162136877	'unroll': 1	'update_epoch': 12	'discount': 0.9481280083694738	'lr': 0.0003704344174582639	'entropy': 0.019659499782273465}. Best is trial 45 with value: -3828.1748046875. [0m
[32m[I 2022-01-12 19:21:55	598] [0m Trial 94 finished with value: -2984.73828125 and parameters: {'r_scaling': 1.8094873056616858	'unroll': 1	'update_epoch': 13	'discount': 0.9582294231017738	'lr': 0.0003574268455989028	'entropy': 0.016883898195262665}. Best is trial 45 with value: -3828.1748046875. [0m
[32m[I 2022-01-12 19:24:10	773] [0m Trial 95 finished with value: -2234.964111328125 and parameters: {'r_scaling': 1.230014319343181	'unroll': 2	'update_epoch': 13	'discount': 0.9537859454037568	'lr': 0.0002428868110039843	'entropy': 0.03856672781664008}. Best is trial 45 with value: -3828.1748046875. [0m
[32m[I 2022-01-12 19:26:32	171] [0m Trial 96 finished with value: -2865.455322265625 and parameters: {'r_scaling': 4.572310943838755	'unroll': 1	'update_epoch': 11	'discount': 0.9597387275101713	'lr': 0.00031126650575197517	'entropy': 0.025249467995177566}. Best is trial 45 with value: -3828.1748046875. [0m
[32m[I 2022-01-12 19:28:23	511] [0m Trial 97 finished with value: -1588.49609375 and parameters: {'r_scaling': 13.521188351677047	'unroll': 2	'update_epoch': 5	'discount': 0.9659951343140104	'lr': 0.0002905145904552753	'entropy': 0.01250476540305445}. Best is trial 45 with value: -3828.1748046875. [0m
[32m[I 2022-01-12 19:30:41	217] [0m Trial 98 finished with value: -2437.176513671875 and parameters: {'r_scaling': 0.5229723687139268	'unroll': 1	'update_epoch': 12	'discount': 0.9767376007392039	'lr': 0.0004935353714960274	'entropy': 0.008433227904208078}. Best is trial 45 with value: -3828.1748046875. [0m
[32m[I 2022-01-12 19:32:57	403] [0m Trial 99 finished with value: -2382.089111328125 and parameters: {'r_scaling': 2.6009467170025813	'unroll': 3	'update_epoch': 14	'discount': 0.9568592246249771	'lr': 0.0004183497119314636	'entropy': 0.04683327484936557}. Best is trial 45 with value: -3828.1748046875. [0m
[32m[I 2022-01-12 19:35:03	009] [0m Trial 100 finished with value: -3427.56640625 and parameters: {'r_scaling': 0.7614598531617497	'unroll': 1	'update_epoch': 15	'discount': 0.9432041211740811	'lr': 0.00013972828338535876	'entropy': 0.03336055769915748}. Best is trial 45 with value: -3828.1748046875. [0m
[32m[I 2022-01-12 19:37:32	608] [0m Trial 101 finished with value: -3111.2099609375 and parameters: {'r_scaling': 0.846554086825588	'unroll': 1	'update_epoch': 15	'discount': 0.9449144386921398	'lr': 0.00011178523701295049	'entropy': 0.03356864200181719}. Best is trial 45 with value: -3828.1748046875. [0m
[32m[I 2022-01-12 19:39:53	941] [0m Trial 102 finished with value: -3089.99560546875 and parameters: {'r_scaling': 1.4279706474600367	'unroll': 1	'update_epoch': 15	'discount': 0.9428306294237433	'lr': 0.00013606198265451192	'entropy': 0.015840991136394023}. Best is trial 45 with value: -3828.1748046875. [0m
[32m[I 2022-01-12 19:42:05	974] [0m Trial 103 finished with value: -2367.198486328125 and parameters: {'r_scaling': 1.8899555245669344	'unroll': 2	'update_epoch': 14	'discount': 0.9477640695823512	'lr': 0.0003468583005244691	'entropy': 0.025417451631631737}. Best is trial 45 with value: -3828.1748046875. [0m
[32m[I 2022-01-12 19:44:10	028] [0m Trial 104 finished with value: -3278.740234375 and parameters: {'r_scaling': 0.6903096303998614	'unroll': 1	'update_epoch': 13	'discount': 0.9404441387094222	'lr': 0.00014392632982219777	'entropy': 0.011307130505857865}. Best is trial 45 with value: -3828.1748046875. [0m
[32m[I 2022-01-12 19:46:21	722] [0m Trial 105 finished with value: -2209.399169921875 and parameters: {'r_scaling': 0.3566495794578133	'unroll': 2	'update_epoch': 13	'discount': 0.9405654254469544	'lr': 0.0001410860460724936	'entropy': 0.011992764792779052}. Best is trial 45 with value: -3828.1748046875. [0m
[32m[I 2022-01-12 19:48:42	320] [0m Trial 106 finished with value: -3203.12939453125 and parameters: {'r_scaling': 0.7165484531246586	'unroll': 1	'update_epoch': 15	'discount': 0.9335144943639777	'lr': 0.00011693022820411096	'entropy': 0.009274832830032106}. Best is trial 45 with value: -3828.1748046875. [0m
[32m[I 2022-01-12 19:51:03	078] [0m Trial 107 finished with value: -3191.4794921875 and parameters: {'r_scaling': 0.12631014781259178	'unroll': 1	'update_epoch': 13	'discount': 0.949504013355537	'lr': 0.0001615914150941465	'entropy': 0.004860118109937776}. Best is trial 45 with value: -3828.1748046875. [0m
[32m[I 2022-01-12 19:53:21	827] [0m Trial 108 finished with value: -2409.889404296875 and parameters: {'r_scaling': 0.09876346672896671	'unroll': 2	'update_epoch': 14	'discount': 0.9387830933222429	'lr': 0.00019712566478843487	'entropy': 0.006733623488066017}. Best is trial 45 with value: -3828.1748046875. [0m
[32m[I 2022-01-12 19:55:43	931] [0m Trial 109 finished with value: -3385.65771484375 and parameters: {'r_scaling': 0.557984563732058	'unroll': 1	'update_epoch': 14	'discount': 0.9353904961787989	'lr': 0.00012396039711993573	'entropy': 0.017207686604120205}. Best is trial 45 with value: -3828.1748046875. [0m
[32m[I 2022-01-12 19:57:39	459] [0m Trial 110 finished with value: -2245.577392578125 and parameters: {'r_scaling': 0.46976580003120627	'unroll': 2	'update_epoch': 15	'discount': 0.936478394935057	'lr': 0.00012417250430003639	'entropy': 0.017427239730424204}. Best is trial 45 with value: -3828.1748046875. [0m
[32m[I 2022-01-12 20:00:12	962] [0m Trial 111 finished with value: -3337.57275390625 and parameters: {'r_scaling': 1.2278468802893927	'unroll': 1	'update_epoch': 14	'discount': 0.927925231205098	'lr': 0.0001546478043172585	'entropy': 0.014658573605006067}. Best is trial 45 with value: -3828.1748046875. [0m
[32m[I 2022-01-12 20:02:39	917] [0m Trial 112 finished with value: -3413.09130859375 and parameters: {'r_scaling': 0.5588970017200501	'unroll': 1	'update_epoch': 14	'discount': 0.9267921558757528	'lr': 0.00014789790805672432	'entropy': 0.015059342454667576}. Best is trial 45 with value: -3828.1748046875. [0m
[32m[I 2022-01-12 20:05:04	254] [0m Trial 113 finished with value: -3494.3388671875 and parameters: {'r_scaling': 0.5231704180962186	'unroll': 1	'update_epoch': 14	'discount': 0.927442483601379	'lr': 0.00014866618411192226	'entropy': 0.022227789573657692}. Best is trial 45 with value: -3828.1748046875. [0m
[32m[I 2022-01-12 20:07:28	889] [0m Trial 114 finished with value: -3284.061279296875 and parameters: {'r_scaling': 0.27179662747194444	'unroll': 1	'update_epoch': 15	'discount': 0.9234732470757023	'lr': 0.00015395441416917306	'entropy': 0.020736829297583543}. Best is trial 45 with value: -3828.1748046875. [0m
[32m[I 2022-01-12 20:09:42	115] [0m Trial 115 finished with value: -2156.98193359375 and parameters: {'r_scaling': 0.5579986859892224	'unroll': 2	'update_epoch': 14	'discount': 0.9267712334151952	'lr': 0.00013535080360891044	'entropy': 0.015340906809734874}. Best is trial 45 with value: -3828.1748046875. [0m
[32m[I 2022-01-12 20:12:15	783] [0m Trial 116 finished with value: -2372.67822265625 and parameters: {'r_scaling': 0.15818959897873422	'unroll': 1	'update_epoch': 14	'discount': 0.9298507093543926	'lr': 0.00017343351163250334	'entropy': 0.024679985729650612}. Best is trial 45 with value: -3828.1748046875. [0m
[32m[I 2022-01-12 20:14:37	480] [0m Trial 117 finished with value: -3443.130126953125 and parameters: {'r_scaling': 0.4866231274446107	'unroll': 1	'update_epoch': 14	'discount': 0.9251291392642333	'lr': 0.00012628731219943353	'entropy': 0.01871015793904606}. Best is trial 45 with value: -3828.1748046875. [0m
[32m[I 2022-01-12 20:16:51	021] [0m Trial 118 finished with value: -2204.021484375 and parameters: {'r_scaling': 0.38710353363344335	'unroll': 2	'update_epoch': 15	'discount': 0.9174990002046196	'lr': 0.00012215846471229255	'entropy': 0.014666281067568697}. Best is trial 45 with value: -3828.1748046875. [0m
[32m[I 2022-01-12 20:19:06	983] [0m Trial 119 finished with value: -2237.02734375 and parameters: {'r_scaling': 0.5125016134811984	'unroll': 3	'update_epoch': 14	'discount': 0.9243912122173736	'lr': 0.00011228328861041762	'entropy': 0.022757829858454454}. Best is trial 45 with value: -3828.1748046875. [0m
[32m[I 2022-01-12 20:21:36	113] [0m Trial 120 finished with value: -3252.408203125 and parameters: {'r_scaling': 0.24177791626851336	'unroll': 1	'update_epoch': 15	'discount': 0.9341243988087088	'lr': 0.00013061214584797224	'entropy': 0.019008931517139598}. Best is trial 45 with value: -3828.1748046875. [0m
[32m[I 2022-01-12 20:23:42	465] [0m Trial 121 finished with value: -3361.221923828125 and parameters: {'r_scaling': 0.7164185648114021	'unroll': 1	'update_epoch': 14	'discount': 0.9307555631512862	'lr': 0.0001507218891967856	'entropy': 0.017312920495048623}. Best is trial 45 with value: -3828.1748046875. [0m
[32m[I 2022-01-12 20:26:04	054] [0m Trial 122 finished with value: -3337.875 and parameters: {'r_scaling': 0.5670767450535436	'unroll': 1	'update_epoch': 14	'discount': 0.9306688105769471	'lr': 0.00015392035543786625	'entropy': 0.017231780234108797}. Best is trial 45 with value: -3828.1748046875. [0m
[32m[I 2022-01-12 20:28:15	156] [0m Trial 123 finished with value: -2127.831298828125 and parameters: {'r_scaling': 0.31300046293839756	'unroll': 2	'update_epoch': 14	'discount': 0.9313271130506777	'lr': 0.00015316230402627088	'entropy': 0.01439633616961562}. Best is trial 45 with value: -3828.1748046875. [0m
[32m[I 2022-01-12 20:30:28	792] [0m Trial 124 finished with value: -3518.12841796875 and parameters: {'r_scaling': 0.415682732978354	'unroll': 1	'update_epoch': 14	'discount': 0.9272940655127653	'lr': 0.00013915005745637667	'entropy': 0.017684475239031643}. Best is trial 45 with value: -3828.1748046875. [0m
[32m[I 2022-01-12 20:32:53	128] [0m Trial 125 finished with value: -3435.794189453125 and parameters: {'r_scaling': 0.4428239810657622	'unroll': 1	'update_epoch': 14	'discount': 0.9268375076492767	'lr': 0.00013875469877673355	'entropy': 0.016771863160490914}. Best is trial 45 with value: -3828.1748046875. [0m
[32m[I 2022-01-12 20:35:10	625] [0m Trial 126 finished with value: -2216.819580078125 and parameters: {'r_scaling': 0.4354102407758593	'unroll': 2	'update_epoch': 14	'discount': 0.9270562337953662	'lr': 0.00014302018320638452	'entropy': 0.018822588042806586}. Best is trial 45 with value: -3828.1748046875. [0m
[32m[I 2022-01-12 20:37:23	341] [0m Trial 127 finished with value: 94.26095581054688 and parameters: {'r_scaling': 0.5965579588666108	'unroll': 9	'update_epoch': 15	'discount': 0.924244791802874	'lr': 0.0001266702431797149	'entropy': 0.02145141349900059}. Best is trial 45 with value: -3828.1748046875. [0m
[32m[I 2022-01-12 20:40:03	526] [0m Trial 128 finished with value: -3230.35888671875 and parameters: {'r_scaling': 0.37243204720219875	'unroll': 1	'update_epoch': 14	'discount': 0.922043341201339	'lr': 0.00016274897784029766	'entropy': 0.027221649657507688}. Best is trial 45 with value: -3828.1748046875. [0m
[32m[I 2022-01-12 20:42:26	235] [0m Trial 129 finished with value: 97.97978210449219 and parameters: {'r_scaling': 0.9140791112191605	'unroll': 14	'update_epoch': 15	'discount': 0.9295244691937545	'lr': 0.0001505361361063696	'entropy': 0.01604738514870932}. Best is trial 45 with value: -3828.1748046875. [0m
[32m[I 2022-01-12 20:45:34	003] [0m Trial 130 finished with value: -3368.63818359375 and parameters: {'r_scaling': 0.1889803531317591	'unroll': 1	'update_epoch': 14	'discount': 0.9316555228448415	'lr': 0.00013689508606845837	'entropy': 0.01331428292606081}. Best is trial 45 with value: -3828.1748046875. [0m
[32m[I 2022-01-12 20:47:41	592] [0m Trial 131 finished with value: -3529.761474609375 and parameters: {'r_scaling': 0.498832384506695	'unroll': 1	'update_epoch': 14	'discount': 0.9316581683100341	'lr': 0.0001389460421002586	'entropy': 0.013836980753249913}. Best is trial 45 with value: -3828.1748046875. [0m
[32m[I 2022-01-12 20:49:47	287] [0m Trial 132 finished with value: -3208.103515625 and parameters: {'r_scaling': 0.4611804755258992	'unroll': 1	'update_epoch': 14	'discount': 0.9316347711331391	'lr': 0.00013697399906032774	'entropy': 0.010384183348086651}. Best is trial 45 with value: -3828.1748046875. [0m
[32m[I 2022-01-12 20:51:52	322] [0m Trial 133 finished with value: -2121.14208984375 and parameters: {'r_scaling': 0.27875747257257394	'unroll': 2	'update_epoch': 15	'discount': 0.9353266630671193	'lr': 0.00011671550619950105	'entropy': 0.02277305282539725}. Best is trial 45 with value: -3828.1748046875. [0m
[32m[I 2022-01-12 20:54:40	910] [0m Trial 134 finished with value: -3238.4296875 and parameters: {'r_scaling': 0.1892945326028304	'unroll': 1	'update_epoch': 14	'discount': 0.9257294002027516	'lr': 0.00013067636646237185	'entropy': 0.0011211576139001016}. Best is trial 45 with value: -3828.1748046875. [0m
[32m[I 2022-01-12 20:56:45	394] [0m Trial 135 finished with value: -3149.263916015625 and parameters: {'r_scaling': 0.5790210302895386	'unroll': 1	'update_epoch': 14	'discount': 0.9185249878876726	'lr': 0.00010992778395339731	'entropy': 0.013462309988182363}. Best is trial 45 with value: -3828.1748046875. [0m
[32m[I 2022-01-12 20:59:33	163] [0m Trial 136 finished with value: -2345.4462890625 and parameters: {'r_scaling': 0.32890362858488054	'unroll': 2	'update_epoch': 15	'discount': 0.930454043993704	'lr': 0.00017981507720701996	'entropy': 0.018763591618449274}. Best is trial 45 with value: -3828.1748046875. [0m
[32m[I 2022-01-12 21:02:40	814] [0m Trial 137 finished with value: -3326.33984375 and parameters: {'r_scaling': 0.39035696340908993	'unroll': 1	'update_epoch': 14	'discount': 0.9327316836649533	'lr': 0.0001221024589724529	'entropy': 0.012050066452223273}. Best is trial 45 with value: -3828.1748046875. [0m
[32m[I 2022-01-12 21:05:54	787] [0m Trial 138 finished with value: -2976.38037109375 and parameters: {'r_scaling': 0.24321822633606155	'unroll': 1	'update_epoch': 15	'discount': 0.9218740654570947	'lr': 0.0001444590486161574	'entropy': 0.022992803571148416}. Best is trial 45 with value: -3828.1748046875. [0m
[32m[I 2022-01-12 21:08:03	549] [0m Trial 139 finished with value: -3413.919677734375 and parameters: {'r_scaling': 0.6932956189021414	'unroll': 1	'update_epoch': 14	'discount': 0.9281503375135497	'lr': 0.00016735062665834783	'entropy': 0.03623797013167538}. Best is trial 45 with value: -3828.1748046875. [0m
[32m[I 2022-01-12 21:10:40	200] [0m Trial 140 finished with value: -2004.38525390625 and parameters: {'r_scaling': 0.4700328883819574	'unroll': 2	'update_epoch': 14	'discount': 0.928098266047844	'lr': 0.00016361755864273633	'entropy': 0.0416318062988608}. Best is trial 45 with value: -3828.1748046875. [0m
[32m[I 2022-01-12 21:13:25	984] [0m Trial 141 finished with value: -3197.302001953125 and parameters: {'r_scaling': 0.764583858151561	'unroll': 1	'update_epoch': 14	'discount': 0.9255406285273179	'lr': 0.00013837166739440415	'entropy': 0.03408077172100853}. Best is trial 45 with value: -3828.1748046875. [0m
[32m[I 2022-01-12 21:16:10	232] [0m Trial 142 finished with value: -3518.147216796875 and parameters: {'r_scaling': 0.547960264876519	'unroll': 1	'update_epoch': 14	'discount': 0.9203115227401933	'lr': 0.0001687572254575637	'entropy': 0.01731075047065549}. Best is trial 45 with value: -3828.1748046875. [0m
[32m[I 2022-01-12 21:18:18	706] [0m Trial 143 finished with value: -3201.33203125 and parameters: {'r_scaling': 0.6554592371829171	'unroll': 1	'update_epoch': 13	'discount': 0.9347338217501489	'lr': 0.0001876319314498737	'entropy': 0.026785338279986297}. Best is trial 45 with value: -3828.1748046875. [0m
[32m[I 2022-01-12 21:21:24	933] [0m Trial 144 finished with value: -3224.176513671875 and parameters: {'r_scaling': 0.495288701873078	'unroll': 1	'update_epoch': 15	'discount': 0.9193385305215548	'lr': 0.00012957371312961226	'entropy': 0.008906433252964174}. Best is trial 45 with value: -3828.1748046875. [0m
[32m[I 2022-01-12 21:24:34	575] [0m Trial 145 finished with value: -3322.734375 and parameters: {'r_scaling': 0.8257163867202233	'unroll': 1	'update_epoch': 14	'discount': 0.9137761804739489	'lr': 0.00017019272589707685	'entropy': 0.019944851621039907}. Best is trial 45 with value: -3828.1748046875. [0m
[32m[I 2022-01-12 21:27:26	639] [0m Trial 146 finished with value: -2208.181640625 and parameters: {'r_scaling': 0.3236548495086172	'unroll': 2	'update_epoch': 14	'discount': 0.9226148270670946	'lr': 0.00011957440760493554	'entropy': 0.013537354011754871}. Best is trial 45 with value: -3828.1748046875. [0m
[32m[I 2022-01-12 21:30:21	307] [0m Trial 147 finished with value: -3023.821044921875 and parameters: {'r_scaling': 0.41461258687589403	'unroll': 1	'update_epoch': 13	'discount': 0.9290265191537422	'lr': 0.000106136272578742	'entropy': 0.03050949229365124}. Best is trial 45 with value: -3828.1748046875. [0m
[32m[I 2022-01-12 21:33:09	088] [0m Trial 148 finished with value: -3270.162109375 and parameters: {'r_scaling': 0.6939555087348221	'unroll': 1	'update_epoch': 15	'discount': 0.9258125699195184	'lr': 0.0001404124657877895	'entropy': 0.010876076520773405}. Best is trial 45 with value: -3828.1748046875. [0m
[32m[I 2022-01-12 21:35:39	998] [0m Trial 149 finished with value: -2275.91259765625 and parameters: {'r_scaling': 0.5221769819889814	'unroll': 2	'update_epoch': 14	'discount': 0.9370946498121876	'lr': 0.00014810069421443466	'entropy': 0.016040143544106454}. Best is trial 45 with value: -3828.1748046875. [0m
[32m[I 2022-01-12 21:38:24	646] [0m Trial 150 finished with value: -3252.10595703125 and parameters: {'r_scaling': 0.8116292178535333	'unroll': 1	'update_epoch': 13	'discount': 0.9207888459012789	'lr': 0.00012841650457754602	'entropy': 0.0022031892883567173}. Best is trial 45 with value: -3828.1748046875. [0m
[32m[I 2022-01-12 21:41:14	488] [0m Trial 151 finished with value: -3398.80517578125 and parameters: {'r_scaling': 0.5720513116418715	'unroll': 1	'update_epoch': 14	'discount': 0.931357430281406	'lr': 0.00015579118813443955	'entropy': 0.01825158311119786}. Best is trial 45 with value: -3828.1748046875. [0m
[32m[I 2022-01-12 21:44:04	372] [0m Trial 152 finished with value: -1704.553955078125 and parameters: {'r_scaling': 0.08250778391548355	'unroll': 1	'update_epoch': 14	'discount': 0.9333020592732815	'lr': 0.00016891830640832634	'entropy': 0.020477438946107717}. Best is trial 45 with value: -3828.1748046875. [0m
[32m[I 2022-01-12 21:46:46	770] [0m Trial 153 finished with value: -2519.487060546875 and parameters: {'r_scaling': 1.0681828401532325	'unroll': 1	'update_epoch': 14	'discount': 0.987970784194129	'lr': 0.00014693900294965003	'entropy': 0.017684647788959243}. Best is trial 45 with value: -3828.1748046875. [0m
[32m[I 2022-01-12 21:49:17	088] [0m Trial 154 finished with value: -2293.787353515625 and parameters: {'r_scaling': 0.6017671937271892	'unroll': 2	'update_epoch': 14	'discount': 0.9291217807491471	'lr': 0.00013282801973629464	'entropy': 0.02402811729035626}. Best is trial 45 with value: -3828.1748046875. [0m
[32m[I 2022-01-12 21:51:47	179] [0m Trial 155 finished with value: -3369.607666015625 and parameters: {'r_scaling': 0.3950752091284038	'unroll': 1	'update_epoch': 13	'discount': 0.9161583009730785	'lr': 0.00017892785478613345	'entropy': 0.013012800234646108}. Best is trial 45 with value: -3828.1748046875. [0m
[32m[I 2022-01-12 21:54:15	883] [0m Trial 156 finished with value: -3206.905029296875 and parameters: {'r_scaling': 0.2080275194254872	'unroll': 1	'update_epoch': 13	'discount': 0.9245209345711177	'lr': 0.00018049791869933165	'entropy': 0.011759222839699398}. Best is trial 45 with value: -3828.1748046875. [0m
[32m[I 2022-01-12 21:56:41	840] [0m Trial 157 finished with value: -3496.197021484375 and parameters: {'r_scaling': 0.3807957334753228	'unroll': 1	'update_epoch': 15	'discount': 0.9152569273012525	'lr': 0.00015786937011886827	'entropy': 0.013702356450734749}. Best is trial 45 with value: -3828.1748046875. [0m
[32m[I 2022-01-12 21:59:14	481] [0m Trial 158 finished with value: -2317.265625 and parameters: {'r_scaling': 0.29847319818843343	'unroll': 2	'update_epoch': 15	'discount': 0.9135393609177541	'lr': 0.0001596545629192763	'entropy': 0.009644539300068979}. Best is trial 45 with value: -3828.1748046875. [0m
[32m[I 2022-01-12 22:02:03	818] [0m Trial 159 finished with value: -3541.4052734375 and parameters: {'r_scaling': 0.38905792618248	'unroll': 1	'update_epoch': 15	'discount': 0.9161097529171304	'lr': 0.00017191922721540698	'entropy': 0.013137614818813977}. Best is trial 45 with value: -3828.1748046875. [0m
[32m[I 2022-01-12 22:04:53	397] [0m Trial 160 finished with value: -3403.8955078125 and parameters: {'r_scaling': 0.47132239390913083	'unroll': 1	'update_epoch': 15	'discount': 0.915956227932934	'lr': 0.00019454993363396552	'entropy': 0.014443641161541341}. Best is trial 45 with value: -3828.1748046875. [0m
[32m[I 2022-01-12 22:07:42	797] [0m Trial 161 finished with value: -3536.28271484375 and parameters: {'r_scaling': 0.3825905931629109	'unroll': 1	'update_epoch': 15	'discount': 0.9159068968286105	'lr': 0.0001882262110785477	'entropy': 0.015095991083903647}. Best is trial 45 with value: -3828.1748046875. [0m
[32m[I 2022-01-12 22:10:26	129] [0m Trial 162 finished with value: -2735.955078125 and parameters: {'r_scaling': 0.35047332999349784	'unroll': 1	'update_epoch': 15	'discount': 0.9095520474336358	'lr': 0.0005919021601864718	'entropy': 0.015379769157393001}. Best is trial 45 with value: -3828.1748046875. [0m
[32m[I 2022-01-12 22:13:06	665] [0m Trial 163 finished with value: -3613.2919921875 and parameters: {'r_scaling': 0.4889170171044156	'unroll': 1	'update_epoch': 15	'discount': 0.9202710872704453	'lr': 0.0001974552467894122	'entropy': 0.015296697537390568}. Best is trial 45 with value: -3828.1748046875. [0m
[32m[I 2022-01-12 22:15:08	374] [0m Trial 164 finished with value: 94.62046813964844 and parameters: {'r_scaling': 0.4676638886824541	'unroll': 11	'update_epoch': 15	'discount': 0.9125297418304904	'lr': 0.0001965625187587654	'entropy': 0.014634983993599993}. Best is trial 45 with value: -3828.1748046875. [0m
[32m[I 2022-01-12 22:17:30	529] [0m Trial 165 finished with value: -2321.09130859375 and parameters: {'r_scaling': 0.4179803039851312	'unroll': 2	'update_epoch': 15	'discount': 0.9041265371702462	'lr': 0.00018797897358526554	'entropy': 0.01128134331482947}. Best is trial 45 with value: -3828.1748046875. [0m
[32m[I 2022-01-12 22:19:55	890] [0m Trial 166 finished with value: -3117.919677734375 and parameters: {'r_scaling': 0.2720119679803159	'unroll': 1	'update_epoch': 15	'discount': 0.9154956867338973	'lr': 0.0002073456923618685	'entropy': 0.020334819339646176}. Best is trial 45 with value: -3828.1748046875. [0m
[32m[I 2022-01-12 22:22:12	118] [0m Trial 167 finished with value: -2279.14453125 and parameters: {'r_scaling': 0.514377536556132	'unroll': 2	'update_epoch': 15	'discount': 0.911726586768974	'lr': 0.00016828793522616136	'entropy': 0.015480402337433386}. Best is trial 45 with value: -3828.1748046875. [0m
[32m[I 2022-01-12 22:24:35	747] [0m Trial 168 finished with value: -3554.175048828125 and parameters: {'r_scaling': 0.38941154063669303	'unroll': 1	'update_epoch': 15	'discount': 0.9174768795786664	'lr': 0.00015872830222078075	'entropy': 0.008392625749405563}. Best is trial 45 with value: -3828.1748046875. [0m
[32m[I 2022-01-12 22:26:44	537] [0m Trial 169 finished with value: -3467.415771484375 and parameters: {'r_scaling': 0.3535449173273151	'unroll': 1	'update_epoch': 15	'discount': 0.917458423508424	'lr': 0.00019030844818055873	'entropy': 0.008181761631126654}. Best is trial 45 with value: -3828.1748046875. [0m
[32m[I 2022-01-12 22:29:17	356] [0m Trial 170 finished with value: -3244.02392578125 and parameters: {'r_scaling': 0.2359386080466493	'unroll': 1	'update_epoch': 15	'discount': 0.9074978511982701	'lr': 0.00017292111767311903	'entropy': 0.0070166128611119}. Best is trial 45 with value: -3828.1748046875. [0m
[32m[I 2022-01-12 22:31:40	558] [0m Trial 171 finished with value: -3477.890380859375 and parameters: {'r_scaling': 0.37404181938406333	'unroll': 1	'update_epoch': 15	'discount': 0.9170007792715813	'lr': 0.0001936942954698644	'entropy': 0.008075826013658737}. Best is trial 45 with value: -3828.1748046875. [0m
[32m[I 2022-01-12 22:34:04	856] [0m Trial 172 finished with value: -3384.6787109375 and parameters: {'r_scaling': 0.3347822418631617	'unroll': 1	'update_epoch': 15	'discount': 0.9177518296894129	'lr': 0.00018453414250207801	'entropy': 0.008457971969435032}. Best is trial 45 with value: -3828.1748046875. [0m
[32m[I 2022-01-12 22:36:26	826] [0m Trial 173 finished with value: -3344.8291015625 and parameters: {'r_scaling': 0.37078832001726725	'unroll': 1	'update_epoch': 15	'discount': 0.9198407594905207	'lr': 0.00020318869172849594	'entropy': 0.009875300954478625}. Best is trial 45 with value: -3828.1748046875. [0m
[32m[I 2022-01-12 22:38:32	525] [0m Trial 174 finished with value: -3329.96826171875 and parameters: {'r_scaling': 0.3018203933783714	'unroll': 1	'update_epoch': 15	'discount': 0.9169836362682683	'lr': 0.00016483849101918071	'entropy': 0.008073603731813846}. Best is trial 45 with value: -3828.1748046875. [0m
[32m[I 2022-01-12 22:40:55	828] [0m Trial 175 finished with value: -3366.57080078125 and parameters: {'r_scaling': 0.4051632862518163	'unroll': 1	'update_epoch': 15	'discount': 0.9200887844670106	'lr': 0.00015994344323379367	'entropy': 0.006279416087359161}. Best is trial 45 with value: -3828.1748046875. [0m
[32m[I 2022-01-12 22:43:10	253] [0m Trial 176 finished with value: -2492.5126953125 and parameters: {'r_scaling': 0.353166248573505	'unroll': 2	'update_epoch': 15	'discount': 0.9148747783233219	'lr': 0.00021310795253134748	'entropy': 0.010409954342923772}. Best is trial 45 with value: -3828.1748046875. [0m
[32m[I 2022-01-12 22:45:27	492] [0m Trial 177 finished with value: -2861.5341796875 and parameters: {'r_scaling': 0.4634999848367293	'unroll': 1	'update_epoch': 7	'discount': 0.9192201949717191	'lr': 0.00014481834528906124	'entropy': 0.008937443798078079}. Best is trial 45 with value: -3828.1748046875. [0m
[32m[I 2022-01-12 22:47:54	926] [0m Trial 178 finished with value: -3467.107177734375 and parameters: {'r_scaling': 0.2670155660103238	'unroll': 1	'update_epoch': 15	'discount': 0.9221512555916952	'lr': 0.00017419218336850112	'entropy': 0.011931712333138752}. Best is trial 45 with value: -3828.1748046875. [0m
[32m[I 2022-01-12 22:50:14	656] [0m Trial 179 finished with value: 99.42924499511719 and parameters: {'r_scaling': 0.2597352016462305	'unroll': 7	'update_epoch': 15	'discount': 0.9177976766506378	'lr': 0.0001791414485858783	'entropy': 0.011145724586584685}. Best is trial 45 with value: -3828.1748046875. [0m
[32m[I 2022-01-12 22:52:17	460] [0m Trial 180 finished with value: 98.32781982421875 and parameters: {'r_scaling': 0.3161087733235028	'unroll': 6	'update_epoch': 15	'discount': 0.9215513221485659	'lr': 0.00019055864022521455	'entropy': 0.007489000306835172}. Best is trial 45 with value: -3828.1748046875. [0m
[32m[I 2022-01-12 22:54:50	748] [0m Trial 181 finished with value: -3397.601318359375 and parameters: {'r_scaling': 0.42309101103314334	'unroll': 1	'update_epoch': 15	'discount': 0.9233468479531444	'lr': 0.00016896301416740559	'entropy': 0.012471152548391953}. Best is trial 45 with value: -3828.1748046875. [0m
[32m[I 2022-01-12 22:57:17	485] [0m Trial 182 finished with value: -3503.8544921875 and parameters: {'r_scaling': 0.5214152260087683	'unroll': 1	'update_epoch': 15	'discount': 0.9143672428871038	'lr': 0.0001551912762811292	'entropy': 0.012566164360934825}. Best is trial 45 with value: -3828.1748046875. [0m
[32m[I 2022-01-12 22:59:41	344] [0m Trial 183 finished with value: -3195.66943359375 and parameters: {'r_scaling': 0.6513524917017207	'unroll': 1	'update_epoch': 15	'discount': 0.9137985171442765	'lr': 0.00015642254928844977	'entropy': 0.0030591493896022373}. Best is trial 45 with value: -3828.1748046875. [0m
[32m[I 2022-01-12 23:01:42	792] [0m Trial 184 finished with value: -1094.81884765625 and parameters: {'r_scaling': 0.41385759241676817	'unroll': 1	'update_epoch': 1	'discount': 0.9103278959657669	'lr': 0.00017564926239461732	'entropy': 0.009399489360687059}. Best is trial 45 with value: -3828.1748046875. [0m
[32m[I 2022-01-12 23:03:46	610] [0m Trial 185 finished with value: -2425.75732421875 and parameters: {'r_scaling': 0.5083287940889861	'unroll': 2	'update_epoch': 15	'discount': 0.9213067117790421	'lr': 0.000194801446046962	'entropy': 0.012577680472942337}. Best is trial 45 with value: -3828.1748046875. [0m
[32m[I 2022-01-12 23:05:45	528] [0m Trial 186 finished with value: -3364.033935546875 and parameters: {'r_scaling': 0.3612859698837865	'unroll': 1	'update_epoch': 15	'discount': 0.9152579297249862	'lr': 0.00013887376786409116	'entropy': 0.010897830201387565}. Best is trial 45 with value: -3828.1748046875. [0m
[32m[I 2022-01-12 23:07:54	885] [0m Trial 187 finished with value: -2284.151123046875 and parameters: {'r_scaling': 0.22663089619015372	'unroll': 2	'update_epoch': 15	'discount': 0.9183420164817618	'lr': 0.0008432013715298211	'entropy': 0.013044905795545328}. Best is trial 45 with value: -3828.1748046875. [0m
[32m[I 2022-01-12 23:10:24	279] [0m Trial 188 finished with value: -3384.318359375 and parameters: {'r_scaling': 0.6262228340342805	'unroll': 1	'update_epoch': 15	'discount': 0.9118305895726402	'lr': 0.0002273832563157505	'entropy': 0.006089202524955261}. Best is trial 45 with value: -3828.1748046875. [0m
[32m[I 2022-01-12 23:12:58	942] [0m Trial 189 finished with value: -2321.609130859375 and parameters: {'r_scaling': 0.06064587964251211	'unroll': 1	'update_epoch': 15	'discount': 0.9168349986402149	'lr': 0.00016323116479671779	'entropy': 0.008123255582626276}. Best is trial 45 with value: -3828.1748046875. [0m
[32m[I 2022-01-12 23:15:20	746] [0m Trial 190 finished with value: -2362.67822265625 and parameters: {'r_scaling': 0.11374084847727005	'unroll': 1	'update_epoch': 4	'discount': 0.9246027679704687	'lr': 0.00015418762616394108	'entropy': 0.009822920087805068}. Best is trial 45 with value: -3828.1748046875. [0m
[32m[I 2022-01-12 23:18:03	845] [0m Trial 191 finished with value: -3307.822998046875 and parameters: {'r_scaling': 0.5460614416067398	'unroll': 1	'update_epoch': 14	'discount': 0.92659329759004	'lr': 0.00014650794901623077	'entropy': 0.01585008845563213}. Best is trial 45 with value: -3828.1748046875. [0m
[32m[I 2022-01-12 23:20:03	189] [0m Trial 192 finished with value: -3472.802490234375 and parameters: {'r_scaling': 0.3013748742424585	'unroll': 1	'update_epoch': 14	'discount': 0.9203740023358545	'lr': 0.00013553318414829562	'entropy': 0.01405134792266282}. Best is trial 45 with value: -3828.1748046875. [0m
[32m[I 2022-01-12 23:22:51	137] [0m Trial 193 finished with value: -3078.900390625 and parameters: {'r_scaling': 0.28291516873544986	'unroll': 1	'update_epoch': 15	'discount': 0.919567752076761	'lr': 0.0001360142687963133	'entropy': 0.013570647193707161}. Best is trial 45 with value: -3828.1748046875. [0m
[32m[I 2022-01-12 23:25:32	288] [0m Trial 194 finished with value: -3445.972900390625 and parameters: {'r_scaling': 0.33332401450169313	'unroll': 1	'update_epoch': 14	'discount': 0.9235893524034208	'lr': 0.0001249428807463899	'entropy': 0.01976591178709047}. Best is trial 45 with value: -3828.1748046875. [0m
[32m[I 2022-01-12 23:28:13	299] [0m Trial 195 finished with value: -2676.7509765625 and parameters: {'r_scaling': 0.16666370497028143	'unroll': 1	'update_epoch': 14	'discount': 0.9227199120836481	'lr': 0.00012607511019282848	'entropy': 0.01865854764485137}. Best is trial 45 with value: -3828.1748046875. [0m
[32m[I 2022-01-12 23:30:47	202] [0m Trial 196 finished with value: -2663.912109375 and parameters: {'r_scaling': 0.34430076150997446	'unroll': 1	'update_epoch': 15	'discount': 0.9209902457725362	'lr': 0.0012201829877477005	'entropy': 0.011613370933728488}. Best is trial 45 with value: -3828.1748046875. [0m
[32m[I 2022-01-12 23:33:02	593] [0m Trial 197 finished with value: -1677.8857421875 and parameters: {'r_scaling': 0.28439507841298123	'unroll': 2	'update_epoch': 8	'discount': 0.9152700857066182	'lr': 0.00011331879833206175	'entropy': 0.021553595035029266}. Best is trial 45 with value: -3828.1748046875. [0m
[32m[I 2022-01-12 23:35:08	421] [0m Trial 198 finished with value: -2177.97802734375 and parameters: {'r_scaling': 0.40751997732867823	'unroll': 2	'update_epoch': 14	'discount': 0.9178997236353806	'lr': 0.00012083309886252133	'entropy': 0.0015864040928319388}. Best is trial 45 with value: -3828.1748046875. [0m
[32m[I 2022-01-12 23:37:08	611] [0m Trial 199 finished with value: -3152.501220703125 and parameters: {'r_scaling': 0.316819480682203	'unroll': 1	'update_epoch': 15	'discount': 0.9239942930614432	'lr': 0.00013299548524292696	'entropy': 0.018103413989664606}. Best is trial 45 with value: -3828.1748046875. [0m
