# Supplementary material
Source: ML conference proceedings conference paper supplement (https://proceedings.neurips.cc/paper_files/paper/2022/hash/10a6bdcabbd5a3d36b760daa295f63c1-Abstract.html)
Supplement: Supplementary file 1 [file 10a6bdcabbd5a3d36b760daa295f63c1-Supplemental-Conference.zip › neurips2022/code/robotics_code/hp_searches/ant_5M.log]

[32m[I 2022-01-10 15:03:43	020] [0m A new study created in memory with name: no-name-d2a106ff-37ba-4e51-adc1-44a3457c6ad1 [0m
[32m[I 2022-01-10 15:05:48	065] [0m Trial 0 finished with value: -2122.198974609375 and parameters: {'r_scaling': 8.980560208404524	'unroll': 5	'update_epoch': 14	'discount': 0.9278191962326999	'lr': 0.0009721230014636144	'entropy': 0.006334378255721679}. Best is trial 0 with value: -2122.198974609375. [0m
[32m[I 2022-01-10 15:07:30	965] [0m Trial 1 finished with value: 99.66404724121094 and parameters: {'r_scaling': 0.050024753884352804	'unroll': 12	'update_epoch': 4	'discount': 0.9480044161350696	'lr': 0.00023323638583382667	'entropy': 0.0020503324765242196}. Best is trial 0 with value: -2122.198974609375. [0m
[32m[I 2022-01-10 15:09:15	007] [0m Trial 2 finished with value: 98.85700988769531 and parameters: {'r_scaling': 1.7369783909948888	'unroll': 10	'update_epoch': 7	'discount': 0.9538411142588669	'lr': 0.00015235935235521038	'entropy': 0.0005275590034283441}. Best is trial 0 with value: -2122.198974609375. [0m
[32m[I 2022-01-10 15:11:26	302] [0m Trial 3 finished with value: 106.10108947753906 and parameters: {'r_scaling': 7.0081937683551185	'unroll': 2	'update_epoch': 12	'discount': 0.9898790744568144	'lr': 0.0015951986630005526	'entropy': 0.00043837265543558756}. Best is trial 0 with value: -2122.198974609375. [0m
[32m[I 2022-01-10 15:13:26	523] [0m Trial 4 finished with value: -990.60595703125 and parameters: {'r_scaling': 0.064274145979093	'unroll': 1	'update_epoch': 2	'discount': 0.9739062000959487	'lr': 0.0006985118049283173	'entropy': 0.00023839967306477726}. Best is trial 0 with value: -2122.198974609375. [0m
[32m[I 2022-01-10 15:15:32	908] [0m Trial 5 finished with value: -1981.7987060546875 and parameters: {'r_scaling': 5.3754933136871665	'unroll': 4	'update_epoch': 10	'discount': 0.9500421645890904	'lr': 0.00025185578085210926	'entropy': 0.0002761870630049275}. Best is trial 0 with value: -2122.198974609375. [0m
[32m[I 2022-01-10 15:17:54	544] [0m Trial 6 finished with value: -3500.7392578125 and parameters: {'r_scaling': 17.720388336370885	'unroll': 3	'update_epoch': 14	'discount': 0.9493385444566694	'lr': 0.00027391863912143904	'entropy': 0.004084949938528114}. Best is trial 6 with value: -3500.7392578125. [0m
[32m[I 2022-01-10 15:20:17	026] [0m Trial 7 finished with value: -1921.4912109375 and parameters: {'r_scaling': 49.12693954866152	'unroll': 2	'update_epoch': 13	'discount': 0.9689914154887801	'lr': 0.00010598567952400122	'entropy': 0.00011342868458327456}. Best is trial 6 with value: -3500.7392578125. [0m
[32m[I 2022-01-10 15:22:39	698] [0m Trial 8 finished with value: -2428.94287109375 and parameters: {'r_scaling': 1.9882894446661918	'unroll': 2	'update_epoch': 14	'discount': 0.991845368649835	'lr': 0.00046299769670426084	'entropy': 0.0006406745357325293}. Best is trial 6 with value: -3500.7392578125. [0m
[32m[I 2022-01-10 15:24:48	493] [0m Trial 9 finished with value: -3193.555419921875 and parameters: {'r_scaling': 0.4169417566558195	'unroll': 4	'update_epoch': 15	'discount': 0.9637798017665357	'lr': 0.00040003439980484544	'entropy': 0.006314631311729472}. Best is trial 6 with value: -3500.7392578125. [0m
[32m[I 2022-01-10 15:26:57	802] [0m Trial 10 finished with value: -2069.003173828125 and parameters: {'r_scaling': 198.23758597609057	'unroll': 7	'update_epoch': 7	'discount': 0.9025050669805704	'lr': 0.0002731313051193114	'entropy': 0.0574356127918866}. Best is trial 6 with value: -3500.7392578125. [0m
[32m[I 2022-01-10 15:28:54	777] [0m Trial 11 finished with value: 96.54109191894531 and parameters: {'r_scaling': 0.48842536379593726	'unroll': 15	'update_epoch': 15	'discount': 0.9268207545271518	'lr': 0.0004449289946951022	'entropy': 0.011028145893402647}. Best is trial 6 with value: -3500.7392578125. [0m
[32m[I 2022-01-10 15:30:49	630] [0m Trial 12 finished with value: -2600.552001953125 and parameters: {'r_scaling': 0.24796982791365382	'unroll': 6	'update_epoch': 10	'discount': 0.9300587007999174	'lr': 0.0005026567659955031	'entropy': 0.022138468027641488}. Best is trial 6 with value: -3500.7392578125. [0m
[32m[I 2022-01-10 15:32:53	201] [0m Trial 13 finished with value: 98.556884765625 and parameters: {'r_scaling': 38.84529227625151	'unroll': 9	'update_epoch': 11	'discount': 0.9656492676844879	'lr': 0.00034451632078868284	'entropy': 0.0027231624480512848}. Best is trial 6 with value: -3500.7392578125. [0m
[32m[I 2022-01-10 15:35:09	372] [0m Trial 14 finished with value: -2312.635498046875 and parameters: {'r_scaling': 0.3228589276211663	'unroll': 4	'update_epoch': 15	'discount': 0.9340593979408811	'lr': 0.00018287244054339836	'entropy': 0.001814618807701545}. Best is trial 6 with value: -3500.7392578125. [0m
[32m[I 2022-01-10 15:37:00	372] [0m Trial 15 finished with value: -2478.5830078125 and parameters: {'r_scaling': 19.67776307195664	'unroll': 4	'update_epoch': 8	'discount': 0.911076874005324	'lr': 0.0006671277524913224	'entropy': 0.006439743512725901}. Best is trial 6 with value: -3500.7392578125. [0m
[32m[I 2022-01-10 15:39:26	811] [0m Trial 16 finished with value: -3716.873291015625 and parameters: {'r_scaling': 0.9526558275794206	'unroll': 7	'update_epoch': 12	'discount': 0.9793433470198949	'lr': 0.001033272001142861	'entropy': 0.02738859241751966}. Best is trial 16 with value: -3716.873291015625. [0m
[32m[I 2022-01-10 15:41:36	629] [0m Trial 17 finished with value: 97.76634979248047 and parameters: {'r_scaling': 1.495702953513396	'unroll': 8	'update_epoch': 12	'discount': 0.9804890346591632	'lr': 0.0017238436293441235	'entropy': 0.05638408161935234}. Best is trial 16 with value: -3716.873291015625. [0m
[32m[I 2022-01-10 15:43:52	443] [0m Trial 18 finished with value: 96.25923156738281 and parameters: {'r_scaling': 170.82537505623972	'unroll': 11	'update_epoch': 10	'discount': 0.9402554781658422	'lr': 0.0010391838994247185	'entropy': 0.025057477662189888}. Best is trial 16 with value: -3716.873291015625. [0m
[32m[I 2022-01-10 15:46:19	615] [0m Trial 19 finished with value: 106.08946990966797 and parameters: {'r_scaling': 18.809301447671263	'unroll': 7	'update_epoch': 9	'discount': 0.9590494758652335	'lr': 0.0012440417399582026	'entropy': 0.021093507137624565}. Best is trial 16 with value: -3716.873291015625. [0m
[32m[I 2022-01-10 15:47:57	008] [0m Trial 20 finished with value: 99.13690185546875 and parameters: {'r_scaling': 0.9644708055617536	'unroll': 14	'update_epoch': 13	'discount': 0.9803593759532505	'lr': 0.0006677624615028446	'entropy': 0.0012612866777329133}. Best is trial 16 with value: -3716.873291015625. [0m
[32m[I 2022-01-10 15:49:57	973] [0m Trial 21 finished with value: -3215.813232421875 and parameters: {'r_scaling': 0.15903103569778373	'unroll': 5	'update_epoch': 15	'discount': 0.9611313455738312	'lr': 0.0003455682129947461	'entropy': 0.005675329821134224}. Best is trial 16 with value: -3716.873291015625. [0m
[32m[I 2022-01-10 15:52:00	611] [0m Trial 22 finished with value: -3423.149658203125 and parameters: {'r_scaling': 0.16610201381045298	'unroll': 6	'update_epoch': 13	'discount': 0.9763379352024116	'lr': 0.0003175942454549916	'entropy': 0.011201503204311453}. Best is trial 16 with value: -3716.873291015625. [0m
[32m[I 2022-01-10 15:53:30	017] [0m Trial 23 finished with value: 100.90660095214844 and parameters: {'r_scaling': 0.11399718437060195	'unroll': 8	'update_epoch': 12	'discount': 0.9807293511202724	'lr': 0.00017402659676078058	'entropy': 0.09395059253057979}. Best is trial 16 with value: -3716.873291015625. [0m
[32m[I 2022-01-10 15:55:32	275] [0m Trial 24 finished with value: -2804.540283203125 and parameters: {'r_scaling': 3.9634399986265856	'unroll': 6	'update_epoch': 13	'discount': 0.9737623709034653	'lr': 0.000300993382486593	'entropy': 0.011661735447249374}. Best is trial 16 with value: -3716.873291015625. [0m
[32m[I 2022-01-10 15:57:23	985] [0m Trial 25 finished with value: -2507.1884765625 and parameters: {'r_scaling': 0.8272635300904367	'unroll': 3	'update_epoch': 5	'discount': 0.9178279080066782	'lr': 0.00011978633281873868	'entropy': 0.01441504374671583}. Best is trial 16 with value: -3716.873291015625. [0m
[32m[I 2022-01-10 15:59:48	752] [0m Trial 26 finished with value: -1730.8087158203125 and parameters: {'r_scaling': 0.13900414364763986	'unroll': 6	'update_epoch': 11	'discount': 0.9411351429069047	'lr': 0.00021962405114319682	'entropy': 0.043806179476719734}. Best is trial 16 with value: -3716.873291015625. [0m
[32m[I 2022-01-10 16:01:56	566] [0m Trial 27 finished with value: 99.76683044433594 and parameters: {'r_scaling': 0.6502169048128128	'unroll': 9	'update_epoch': 14	'discount': 0.9887068780558878	'lr': 0.0005585539436462375	'entropy': 0.003729664905878494}. Best is trial 16 with value: -3716.873291015625. [0m
[32m[I 2022-01-10 16:04:45	453] [0m Trial 28 finished with value: -2126.03515625 and parameters: {'r_scaling': 2.691984849512311	'unroll': 1	'update_epoch': 11	'discount': 0.972001154860077	'lr': 0.0009512236137378437	'entropy': 0.033576476345864685}. Best is trial 16 with value: -3716.873291015625. [0m
[32m[I 2022-01-10 16:07:04	001] [0m Trial 29 finished with value: -1952.07958984375 and parameters: {'r_scaling': 12.230118348532413	'unroll': 5	'update_epoch': 13	'discount': 0.9579936581252346	'lr': 0.0008058822642983734	'entropy': 0.004067129440558423}. Best is trial 16 with value: -3716.873291015625. [0m
[32m[I 2022-01-10 16:09:28	852] [0m Trial 30 finished with value: 107.98959350585938 and parameters: {'r_scaling': 62.675675699032034	'unroll': 7	'update_epoch': 14	'discount': 0.9942363319580183	'lr': 0.0013864518295143736	'entropy': 0.008994234861495119}. Best is trial 16 with value: -3716.873291015625. [0m
[32m[I 2022-01-10 16:11:46	956] [0m Trial 31 finished with value: -3220.76416015625 and parameters: {'r_scaling': 0.1962134770171122	'unroll': 5	'update_epoch': 15	'discount': 0.9597292111700415	'lr': 0.00034017764536496735	'entropy': 0.005984057683370829}. Best is trial 16 with value: -3716.873291015625. [0m
[32m[I 2022-01-10 16:13:55	341] [0m Trial 32 finished with value: -5227.3486328125 and parameters: {'r_scaling': 0.07785834225138609	'unroll': 3	'update_epoch': 14	'discount': 0.9526765071523424	'lr': 0.00035546792018557145	'entropy': 0.0013762092022418227}. Best is trial 32 with value: -5227.3486328125. [0m
[32m[I 2022-01-10 16:15:57	932] [0m Trial 33 finished with value: -4104.595703125 and parameters: {'r_scaling': 0.06560775045675638	'unroll': 3	'update_epoch': 12	'discount': 0.9435231733158234	'lr': 0.00021339447086498104	'entropy': 0.0010772102138968229}. Best is trial 32 with value: -5227.3486328125. [0m
[32m[I 2022-01-10 16:18:12	972] [0m Trial 34 finished with value: -4674.62646484375 and parameters: {'r_scaling': 0.10110101960723258	'unroll': 3	'update_epoch': 12	'discount': 0.9481097589018059	'lr': 0.00021297528457190086	'entropy': 0.0010239262351741866}. Best is trial 32 with value: -5227.3486328125. [0m
[32m[I 2022-01-10 16:20:26	384] [0m Trial 35 finished with value: -3069.25634765625 and parameters: {'r_scaling': 0.06099427703762942	'unroll': 3	'update_epoch': 9	'discount': 0.943908210456179	'lr': 0.00013530726706616344	'entropy': 0.0008455940200885121}. Best is trial 32 with value: -5227.3486328125. [0m
[32m[I 2022-01-10 16:22:57	635] [0m Trial 36 finished with value: -3653.341064453125 and parameters: {'r_scaling': 0.08413016844102911	'unroll': 1	'update_epoch': 12	'discount': 0.9532866362258051	'lr': 0.000197291886727165	'entropy': 0.0012325638379039293}. Best is trial 32 with value: -5227.3486328125. [0m
[32m[I 2022-01-10 16:24:55	964] [0m Trial 37 finished with value: 94.21794128417969 and parameters: {'r_scaling': 0.05010968341659451	'unroll': 12	'update_epoch': 5	'discount': 0.9348126127082366	'lr': 0.0001455834553394691	'entropy': 0.0002794161153317755}. Best is trial 32 with value: -5227.3486328125. [0m
[32m[I 2022-01-10 16:26:57	171] [0m Trial 38 finished with value: -1626.468994140625 and parameters: {'r_scaling': 0.09403029033674096	'unroll': 3	'update_epoch': 1	'discount': 0.9215791290699582	'lr': 0.0002119256927480264	'entropy': 0.0021866310878360224}. Best is trial 32 with value: -5227.3486328125. [0m
[32m[I 2022-01-10 16:29:20	422] [0m Trial 39 finished with value: -4796.98681640625 and parameters: {'r_scaling': 0.08830154452899962	'unroll': 2	'update_epoch': 11	'discount': 0.9468970776468847	'lr': 0.00024015261256719758	'entropy': 0.0011559738378028156}. Best is trial 32 with value: -5227.3486328125. [0m
[32m[I 2022-01-10 16:31:42	035] [0m Trial 40 finished with value: -3741.980224609375 and parameters: {'r_scaling': 0.07778954094031304	'unroll': 2	'update_epoch': 9	'discount': 0.946533423908245	'lr': 0.00023853441157088647	'entropy': 0.0008766405209699288}. Best is trial 32 with value: -5227.3486328125. [0m
[32m[I 2022-01-10 16:34:01	091] [0m Trial 41 finished with value: -4013.3515625 and parameters: {'r_scaling': 0.07640459922410958	'unroll': 2	'update_epoch': 9	'discount': 0.9473136238823351	'lr': 0.0002394270941538437	'entropy': 0.0004390664140745307}. Best is trial 32 with value: -5227.3486328125. [0m
[32m[I 2022-01-10 16:36:20	214] [0m Trial 42 finished with value: -3983.03515625 and parameters: {'r_scaling': 0.23096725572129798	'unroll': 2	'update_epoch': 10	'discount': 0.9532083171318946	'lr': 0.00016891737085132782	'entropy': 0.0004566018009207573}. Best is trial 32 with value: -5227.3486328125. [0m
[32m[I 2022-01-10 16:38:43	965] [0m Trial 43 finished with value: -4892.57421875 and parameters: {'r_scaling': 0.10459846150348193	'unroll': 2	'update_epoch': 11	'discount': 0.9379372268680772	'lr': 0.00026538882898465363	'entropy': 0.0014458336791442366}. Best is trial 32 with value: -5227.3486328125. [0m
[32m[I 2022-01-10 16:41:16	023] [0m Trial 44 finished with value: -3562.645263671875 and parameters: {'r_scaling': 0.11730328669612108	'unroll': 1	'update_epoch': 11	'discount': 0.9376831436201956	'lr': 0.00028892102871671714	'entropy': 0.001658590389693406}. Best is trial 32 with value: -5227.3486328125. [0m
[32m[I 2022-01-10 16:43:33	610] [0m Trial 45 finished with value: -4677.6279296875 and parameters: {'r_scaling': 0.2930973940626085	'unroll': 3	'update_epoch': 12	'discount': 0.9434417189431903	'lr': 0.00041183546468739576	'entropy': 0.0007124810562522371}. Best is trial 32 with value: -5227.3486328125. [0m
[32m[I 2022-01-10 16:45:41	877] [0m Trial 46 finished with value: -2952.6279296875 and parameters: {'r_scaling': 0.3647217466394951	'unroll': 4	'update_epoch': 11	'discount': 0.9509507886666763	'lr': 0.0004079567912431287	'entropy': 0.0006346084269640576}. Best is trial 32 with value: -5227.3486328125. [0m
[32m[I 2022-01-10 16:47:49	725] [0m Trial 47 finished with value: -4040.63134765625 and parameters: {'r_scaling': 0.24568896960962966	'unroll': 2	'update_epoch': 13	'discount': 0.9287997012699876	'lr': 0.00038047831796230954	'entropy': 0.00020568162203479695}. Best is trial 32 with value: -5227.3486328125. [0m
[32m[I 2022-01-10 16:50:11	427] [0m Trial 48 finished with value: -2846.107177734375 and parameters: {'r_scaling': 0.5243717428357559	'unroll': 1	'update_epoch': 7	'discount': 0.9331295622154804	'lr': 0.000544539180144096	'entropy': 0.002517620894390543}. Best is trial 32 with value: -5227.3486328125. [0m
[32m[I 2022-01-10 16:52:12	853] [0m Trial 49 finished with value: -2407.440673828125 and parameters: {'r_scaling': 0.30622604497872324	'unroll': 4	'update_epoch': 8	'discount': 0.9387484551267088	'lr': 0.00027808547259991457	'entropy': 0.000692426115665253}. Best is trial 32 with value: -5227.3486328125. [0m
[32m[I 2022-01-10 16:54:34	476] [0m Trial 50 finished with value: -3962.58837890625 and parameters: {'r_scaling': 0.11177387464954654	'unroll': 3	'update_epoch': 14	'discount': 0.9224213941049764	'lr': 0.00046167123448960024	'entropy': 0.0016561900882860962}. Best is trial 32 with value: -5227.3486328125. [0m
[32m[I 2022-01-10 16:56:49	670] [0m Trial 51 finished with value: -4304.68701171875 and parameters: {'r_scaling': 0.05076411050788223	'unroll': 3	'update_epoch': 12	'discount': 0.9439884664051427	'lr': 0.0002663301397605051	'entropy': 0.0012012568011317123}. Best is trial 32 with value: -5227.3486328125. [0m
[32m[I 2022-01-10 16:58:54	358] [0m Trial 52 finished with value: -4922.3486328125 and parameters: {'r_scaling': 0.05756203774298681	'unroll': 2	'update_epoch': 12	'discount': 0.9559232917128365	'lr': 0.00025720067674386	'entropy': 0.0009674945414447275}. Best is trial 32 with value: -5227.3486328125. [0m
[32m[I 2022-01-10 17:00:56	866] [0m Trial 53 finished with value: -3968.7978515625 and parameters: {'r_scaling': 0.15099584460994184	'unroll': 2	'update_epoch': 11	'discount': 0.9543550586577597	'lr': 0.0002551455283458316	'entropy': 0.00035480505779184523}. Best is trial 32 with value: -5227.3486328125. [0m
[32m[I 2022-01-10 17:03:11	067] [0m Trial 54 finished with value: -3615.987548828125 and parameters: {'r_scaling': 0.08857477652777695	'unroll': 1	'update_epoch': 10	'discount': 0.9490611893004932	'lr': 0.0003725265974067782	'entropy': 0.000764324208411802}. Best is trial 32 with value: -5227.3486328125. [0m
[32m[I 2022-01-10 17:05:16	033] [0m Trial 55 finished with value: -2206.02099609375 and parameters: {'r_scaling': 0.20149125044320254	'unroll': 4	'update_epoch': 10	'discount': 0.9686278612028232	'lr': 0.00018925471213689744	'entropy': 0.0005460478936995908}. Best is trial 32 with value: -5227.3486328125. [0m
[32m[I 2022-01-10 17:07:36	950] [0m Trial 56 finished with value: -4219.92236328125 and parameters: {'r_scaling': 0.11490081047186426	'unroll': 2	'update_epoch': 13	'discount': 0.9569063437404017	'lr': 0.0003254450761016482	'entropy': 0.0030517111809205103}. Best is trial 32 with value: -5227.3486328125. [0m
[32m[I 2022-01-10 17:09:48	225] [0m Trial 57 finished with value: -3182.9091796875 and parameters: {'r_scaling': 0.06435447146962799	'unroll': 5	'update_epoch': 14	'discount': 0.9644518038675952	'lr': 0.00042915446587324873	'entropy': 0.0015777223801819802}. Best is trial 32 with value: -5227.3486328125. [0m
[32m[I 2022-01-10 17:11:58	616] [0m Trial 58 finished with value: -2475.94140625 and parameters: {'r_scaling': 0.16007712513523673	'unroll': 4	'update_epoch': 12	'discount': 0.9507338625549966	'lr': 0.00016094426238315884	'entropy': 0.0009067543128167119}. Best is trial 32 with value: -5227.3486328125. [0m
[32m[I 2022-01-10 17:14:16	709] [0m Trial 59 finished with value: -4329.96875 and parameters: {'r_scaling': 0.3016623734072798	'unroll': 3	'update_epoch': 12	'discount': 0.9369085471217998	'lr': 0.00030300849319507556	'entropy': 0.0001589063063975534}. Best is trial 32 with value: -5227.3486328125. [0m
[32m[I 2022-01-10 17:16:20	348] [0m Trial 60 finished with value: -3996.64697265625 and parameters: {'r_scaling': 0.11500672393095657	'unroll': 2	'update_epoch': 11	'discount': 0.9318100297945328	'lr': 0.0003623363316262835	'entropy': 0.0020101415240482987}. Best is trial 32 with value: -5227.3486328125. [0m
[32m[I 2022-01-10 17:18:39	071] [0m Trial 61 finished with value: -4541.8173828125 and parameters: {'r_scaling': 0.3109834286329496	'unroll': 3	'update_epoch': 13	'discount': 0.9376729682730998	'lr': 0.00029718747646990804	'entropy': 0.00015133222381428916}. Best is trial 32 with value: -5227.3486328125. [0m
[32m[I 2022-01-10 17:21:00	896] [0m Trial 62 finished with value: -4467.64111328125 and parameters: {'r_scaling': 1.2199782529012853	'unroll': 3	'update_epoch': 13	'discount': 0.9416356642920528	'lr': 0.00025015315170243564	'entropy': 0.000125114602561601}. Best is trial 32 with value: -5227.3486328125. [0m
[32m[I 2022-01-10 17:23:42	288] [0m Trial 63 finished with value: -3333.41357421875 and parameters: {'r_scaling': 0.49155104513185033	'unroll': 1	'update_epoch': 14	'discount': 0.9461156503569974	'lr': 0.00022377406250284108	'entropy': 0.00034413407417988994}. Best is trial 32 with value: -5227.3486328125. [0m
[32m[I 2022-01-10 17:25:48	387] [0m Trial 64 finished with value: -2505.154296875 and parameters: {'r_scaling': 0.050190828023325564	'unroll': 4	'update_epoch': 13	'discount': 0.9254032401972804	'lr': 0.00031207677457957913	'entropy': 0.0014112554794395108}. Best is trial 32 with value: -5227.3486328125. [0m
[32m[I 2022-01-10 17:28:16	960] [0m Trial 65 finished with value: -5305.048828125 and parameters: {'r_scaling': 0.0952236914198717	'unroll': 2	'update_epoch': 14	'discount': 0.955424405133196	'lr': 0.000281314378291889	'entropy': 0.0009453905238817891}. Best is trial 65 with value: -5305.048828125. [0m
[32m[I 2022-01-10 17:30:48	956] [0m Trial 66 finished with value: -4891.994140625 and parameters: {'r_scaling': 0.09693989220368578	'unroll': 2	'update_epoch': 15	'discount': 0.9618850736739807	'lr': 0.00019437325923716517	'entropy': 0.001027829134512487}. Best is trial 65 with value: -5305.048828125. [0m
[32m[I 2022-01-10 17:33:11	978] [0m Trial 67 finished with value: -3471.3642578125 and parameters: {'r_scaling': 0.07046181823073977	'unroll': 2	'update_epoch': 15	'discount': 0.9665249869220792	'lr': 0.000509908038036217	'entropy': 0.0005827808104190755}. Best is trial 65 with value: -5305.048828125. [0m
[32m[I 2022-01-10 17:35:53	371] [0m Trial 68 finished with value: -3659.1689453125 and parameters: {'r_scaling': 0.1442164853721466	'unroll': 1	'update_epoch': 15	'discount': 0.9563645348468521	'lr': 0.00018648637639558799	'entropy': 0.0021470332852510936}. Best is trial 65 with value: -5305.048828125. [0m
[32m[I 2022-01-10 17:38:31	789] [0m Trial 69 finished with value: -3399.927490234375 and parameters: {'r_scaling': 0.20072204688031595	'unroll': 1	'update_epoch': 14	'discount': 0.9614514452575916	'lr': 0.0004117035823337048	'entropy': 0.000997823663292386}. Best is trial 65 with value: -5305.048828125. [0m
[32m[I 2022-01-10 17:40:54	302] [0m Trial 70 finished with value: -4379.8662109375 and parameters: {'r_scaling': 0.0846462336630786	'unroll': 2	'update_epoch': 14	'discount': 0.9616543711054851	'lr': 0.00010147627806587493	'entropy': 0.0014107777676661338}. Best is trial 65 with value: -5305.048828125. [0m
[32m[I 2022-01-10 17:43:04	665] [0m Trial 71 finished with value: -4761.52490234375 and parameters: {'r_scaling': 0.0954230773205333	'unroll': 3	'update_epoch': 15	'discount': 0.9531313278316207	'lr': 0.00020295851871201596	'entropy': 0.0010646720328872463}. Best is trial 65 with value: -5305.048828125. [0m
[32m[I 2022-01-10 17:45:27	972] [0m Trial 72 finished with value: -5030.693359375 and parameters: {'r_scaling': 0.06152001119891448	'unroll': 2	'update_epoch': 15	'discount': 0.9547895765015217	'lr': 0.0002707692693297685	'entropy': 0.0007616049808876393}. Best is trial 65 with value: -5305.048828125. [0m
[32m[I 2022-01-10 17:47:51	364] [0m Trial 73 finished with value: -5016.58984375 and parameters: {'r_scaling': 0.05723031162440096	'unroll': 2	'update_epoch': 15	'discount': 0.9549009368018087	'lr': 0.000270783659490146	'entropy': 0.0010755171462731256}. Best is trial 65 with value: -5305.048828125. [0m
[32m[I 2022-01-10 17:50:16	442] [0m Trial 74 finished with value: -4425.1552734375 and parameters: {'r_scaling': 0.06357622226483428	'unroll': 2	'update_epoch': 15	'discount': 0.9559177067079722	'lr': 0.0002695292119220351	'entropy': 0.0024483958401958837}. Best is trial 65 with value: -5305.048828125. [0m
[32m[I 2022-01-10 17:52:57	123] [0m Trial 75 finished with value: -4672.9365234375 and parameters: {'r_scaling': 0.13405913784706486	'unroll': 1	'update_epoch': 15	'discount': 0.963045563169466	'lr': 0.00023552567853724407	'entropy': 0.0007838630622276776}. Best is trial 65 with value: -5305.048828125. [0m
[32m[I 2022-01-10 17:55:18	448] [0m Trial 76 finished with value: -5073.36376953125 and parameters: {'r_scaling': 0.05976481520146462	'unroll': 2	'update_epoch': 14	'discount': 0.9590524379402697	'lr': 0.00033902820697415364	'entropy': 0.0012969538791382303}. Best is trial 65 with value: -5305.048828125. [0m
[32m[I 2022-01-10 17:57:32	273] [0m Trial 77 finished with value: -5158.92041015625 and parameters: {'r_scaling': 0.056199343638652116	'unroll': 2	'update_epoch': 14	'discount': 0.9588967178029149	'lr': 0.0003381352952074032	'entropy': 0.0014350294937944712}. Best is trial 65 with value: -5305.048828125. [0m
[32m[I 2022-01-10 17:59:53	692] [0m Trial 78 finished with value: -4165.4482421875 and parameters: {'r_scaling': 0.05585923372998264	'unroll': 1	'update_epoch': 14	'discount': 0.9705867376836022	'lr': 0.0003345127962615254	'entropy': 0.003421231335726429}. Best is trial 65 with value: -5305.048828125. [0m
[32m[I 2022-01-10 18:01:24	337] [0m Trial 79 finished with value: 96.21229553222656 and parameters: {'r_scaling': 0.07116216352803902	'unroll': 10	'update_epoch': 14	'discount': 0.9674861211793577	'lr': 0.00036067639734787947	'entropy': 0.001880539039450879}. Best is trial 65 with value: -5305.048828125. [0m
[32m[I 2022-01-10 18:03:32	080] [0m Trial 80 finished with value: -4507.16552734375 and parameters: {'r_scaling': 0.06589855697770634	'unroll': 2	'update_epoch': 14	'discount': 0.9505803887688504	'lr': 0.00027996524935371917	'entropy': 0.001397409085088057}. Best is trial 65 with value: -5305.048828125. [0m
[32m[I 2022-01-10 18:06:03	501] [0m Trial 81 finished with value: -4245.72998046875 and parameters: {'r_scaling': 5.986513281477877	'unroll': 2	'update_epoch': 15	'discount': 0.958718815323242	'lr': 0.0002538731330925556	'entropy': 0.0008947730666003121}. Best is trial 65 with value: -5305.048828125. [0m
[32m[I 2022-01-10 18:08:37	048] [0m Trial 82 finished with value: -4809.21484375 and parameters: {'r_scaling': 0.07670165856607931	'unroll': 1	'update_epoch': 15	'discount': 0.9601686254279554	'lr': 0.0003221040557460054	'entropy': 0.00047659807031378936}. Best is trial 65 with value: -5305.048828125. [0m
[32m[I 2022-01-10 18:11:09	047] [0m Trial 83 finished with value: -4842.4853515625 and parameters: {'r_scaling': 0.09591388542154808	'unroll': 2	'update_epoch': 15	'discount': 0.9645749430357287	'lr': 0.0002838189659000143	'entropy': 0.0050262527952168205}. Best is trial 65 with value: -5305.048828125. [0m
[32m[I 2022-01-10 18:13:09	766] [0m Trial 84 finished with value: 97.02981567382812 and parameters: {'r_scaling': 0.05718036918367885	'unroll': 13	'update_epoch': 14	'discount': 0.9547051106113473	'lr': 0.0003828126027306256	'entropy': 0.0013028636594976971}. Best is trial 65 with value: -5305.048828125. [0m
[32m[I 2022-01-10 18:15:39	199] [0m Trial 85 finished with value: -5268.16650390625 and parameters: {'r_scaling': 0.18139733208081507	'unroll': 3	'update_epoch': 15	'discount': 0.9582529310776885	'lr': 0.00035274666323784667	'entropy': 0.0006118407661607235}. Best is trial 65 with value: -5305.048828125. [0m
[32m[I 2022-01-10 18:17:33	083] [0m Trial 86 finished with value: -2691.853515625 and parameters: {'r_scaling': 0.05840714196838117	'unroll': 4	'update_epoch': 14	'discount': 0.9522065276405867	'lr': 0.0003428621008551967	'entropy': 0.0006181423458178322}. Best is trial 65 with value: -5305.048828125. [0m
[32m[I 2022-01-10 18:19:54	659] [0m Trial 87 finished with value: -5357.4013671875 and parameters: {'r_scaling': 0.12964124538367022	'unroll': 3	'update_epoch': 13	'discount': 0.9571073063711575	'lr': 0.00047821511016878175	'entropy': 0.0016664005533538154}. Best is trial 87 with value: -5357.4013671875. [0m
[32m[I 2022-01-10 18:22:03	783] [0m Trial 88 finished with value: -5281.572265625 and parameters: {'r_scaling': 0.12495006993465368	'unroll': 3	'update_epoch': 13	'discount': 0.9577819238548584	'lr': 0.0004922326202743772	'entropy': 0.0005320606646220659}. Best is trial 87 with value: -5357.4013671875. [0m
[32m[I 2022-01-10 18:24:24	006] [0m Trial 89 finished with value: -5120.9091796875 and parameters: {'r_scaling': 0.12515724897731892	'unroll': 3	'update_epoch': 13	'discount': 0.9584320035336993	'lr': 0.0004895766004649561	'entropy': 0.0003427373565985678}. Best is trial 87 with value: -5357.4013671875. [0m
[32m[I 2022-01-10 18:26:22	870] [0m Trial 90 finished with value: -2275.981201171875 and parameters: {'r_scaling': 0.17951965697457684	'unroll': 5	'update_epoch': 3	'discount': 0.9590092561770449	'lr': 0.0006034097626305344	'entropy': 0.00032486503815374506}. Best is trial 87 with value: -5357.4013671875. [0m
[32m[I 2022-01-10 18:28:43	308] [0m Trial 91 finished with value: -5402.9326171875 and parameters: {'r_scaling': 0.1297975877586851	'unroll': 3	'update_epoch': 13	'discount': 0.9580833777549901	'lr': 0.000491163318087078	'entropy': 0.0005127121406993457}. Best is trial 91 with value: -5402.9326171875. [0m
[32m[I 2022-01-10 18:30:52	241] [0m Trial 92 finished with value: -3262.00146484375 and parameters: {'r_scaling': 0.14355324748797685	'unroll': 4	'update_epoch': 13	'discount': 0.9584573894705288	'lr': 0.0004875703704393689	'entropy': 0.000375029670787796}. Best is trial 91 with value: -5402.9326171875. [0m
[32m[I 2022-01-10 18:33:09	773] [0m Trial 93 finished with value: -5221.916015625 and parameters: {'r_scaling': 0.12314101451311825	'unroll': 3	'update_epoch': 13	'discount': 0.9651656004937433	'lr': 0.0006049929029457379	'entropy': 0.00026532131682086403}. Best is trial 91 with value: -5402.9326171875. [0m
[32m[I 2022-01-10 18:35:27	269] [0m Trial 94 finished with value: -5087.89794921875 and parameters: {'r_scaling': 0.2148101260118865	'unroll': 3	'update_epoch': 13	'discount': 0.9705367873925772	'lr': 0.0007236800632002308	'entropy': 0.00023743041405398783}. Best is trial 91 with value: -5402.9326171875. [0m
[32m[I 2022-01-10 18:37:42	803] [0m Trial 95 finished with value: -3376.1640625 and parameters: {'r_scaling': 0.2320887873920283	'unroll': 5	'update_epoch': 13	'discount': 0.9718692183649694	'lr': 0.0007552589281027698	'entropy': 0.00021763965377759114}. Best is trial 91 with value: -5402.9326171875. [0m
[32m[I 2022-01-10 18:39:46	515] [0m Trial 96 finished with value: -5180.5205078125 and parameters: {'r_scaling': 0.38815834019960094	'unroll': 3	'update_epoch': 13	'discount': 0.9655253554469563	'lr': 0.0006014375626807698	'entropy': 0.0002788915015521718}. Best is trial 91 with value: -5402.9326171875. [0m
[32m[I 2022-01-10 18:41:48	555] [0m Trial 97 finished with value: -4482.478515625 and parameters: {'r_scaling': 0.3755793555031818	'unroll': 3	'update_epoch': 13	'discount': 0.9648757149437587	'lr': 0.0006027939419772529	'entropy': 0.00019155997827146218}. Best is trial 91 with value: -5402.9326171875. [0m
[32m[I 2022-01-10 18:43:53	071] [0m Trial 98 finished with value: -3268.509765625 and parameters: {'r_scaling': 0.12815794994618357	'unroll': 4	'update_epoch': 12	'discount': 0.9671726276948862	'lr': 0.0006195805483500542	'entropy': 0.0004958412950789896}. Best is trial 91 with value: -5402.9326171875. [0m
[32m[I 2022-01-10 18:45:44	818] [0m Trial 99 finished with value: -3887.477294921875 and parameters: {'r_scaling': 0.16650008524736357	'unroll': 3	'update_epoch': 6	'discount': 0.976088487106877	'lr': 0.0005247200512538535	'entropy': 0.00040974819819728945}. Best is trial 91 with value: -5402.9326171875. [0m
[32m[I 2022-01-10 18:47:36	078] [0m Trial 100 finished with value: -3873.011962890625 and parameters: {'r_scaling': 0.1801372881249953	'unroll': 4	'update_epoch': 13	'discount': 0.9630030161633332	'lr': 0.0004775225755085511	'entropy': 0.0003137203810206457}. Best is trial 91 with value: -5402.9326171875. [0m
[32m[I 2022-01-10 18:49:52	228] [0m Trial 101 finished with value: -5034.400390625 and parameters: {'r_scaling': 0.26522463619718967	'unroll': 3	'update_epoch': 13	'discount': 0.975898605629212	'lr': 0.0007207517359650608	'entropy': 0.0002734857498733135}. Best is trial 91 with value: -5402.9326171875. [0m
[32m[I 2022-01-10 18:52:18	178] [0m Trial 102 finished with value: 97.64231872558594 and parameters: {'r_scaling': 0.12237675541693124	'unroll': 3	'update_epoch': 14	'discount': 0.9699408757995255	'lr': 0.0008428303334976651	'entropy': 0.00024110282340942396}. Best is trial 91 with value: -5402.9326171875. [0m
[32m[I 2022-01-10 18:54:37	755] [0m Trial 103 finished with value: -5211.2783203125 and parameters: {'r_scaling': 0.22183945283284806	'unroll': 3	'update_epoch': 13	'discount': 0.9734372474637621	'lr': 0.0005729113100133452	'entropy': 0.0002716603540420685}. Best is trial 91 with value: -5402.9326171875. [0m
[32m[I 2022-01-10 18:56:54	414] [0m Trial 104 finished with value: -5076.27099609375 and parameters: {'r_scaling': 0.40866938211965964	'unroll': 3	'update_epoch': 13	'discount': 0.9820105522638782	'lr': 0.00044213904573690014	'entropy': 0.0004003803900844625}. Best is trial 91 with value: -5402.9326171875. [0m
[32m[I 2022-01-10 18:59:01	827] [0m Trial 105 finished with value: -3337.778564453125 and parameters: {'r_scaling': 0.136344066563425	'unroll': 4	'update_epoch': 14	'discount': 0.9838282727794979	'lr': 0.0005694066290419437	'entropy': 0.0002990801640784657}. Best is trial 91 with value: -5402.9326171875. [0m
[32m[I 2022-01-10 19:01:06	813] [0m Trial 106 finished with value: -2748.522705078125 and parameters: {'r_scaling': 0.6037007127039867	'unroll': 4	'update_epoch': 12	'discount': 0.957370417132048	'lr': 0.0005723591060226166	'entropy': 0.0001675247519720156}. Best is trial 91 with value: -5402.9326171875. [0m
[32m[I 2022-01-10 19:03:23	760] [0m Trial 107 finished with value: -5450.35546875 and parameters: {'r_scaling': 0.25390811947371256	'unroll': 3	'update_epoch': 13	'discount': 0.9733615932266048	'lr': 0.0004624591152862615	'entropy': 0.00026372832954939214}. Best is trial 107 with value: -5450.35546875. [0m
[32m[I 2022-01-10 19:05:35	160] [0m Trial 108 finished with value: -3720.432373046875 and parameters: {'r_scaling': 0.26151642816755305	'unroll': 5	'update_epoch': 14	'discount': 0.9739676490268249	'lr': 0.0006707789788128009	'entropy': 0.00026183823942005813}. Best is trial 107 with value: -5450.35546875. [0m
[32m[I 2022-01-10 19:07:44	630] [0m Trial 109 finished with value: -5000.0302734375 and parameters: {'r_scaling': 1.8928358997947996	'unroll': 3	'update_epoch': 13	'discount': 0.9785062573196577	'lr': 0.0004566629652408234	'entropy': 0.0005382488258575511}. Best is trial 107 with value: -5450.35546875. [0m
[32m[I 2022-01-10 19:10:02	920] [0m Trial 110 finished with value: -4547.5205078125 and parameters: {'r_scaling': 0.1667619002169436	'unroll': 3	'update_epoch': 12	'discount': 0.966272436598893	'lr': 0.0005278491893851094	'entropy': 0.00010374671624680064}. Best is trial 107 with value: -5450.35546875. [0m
[32m[I 2022-01-10 19:12:04	870] [0m Trial 111 finished with value: -5068.45556640625 and parameters: {'r_scaling': 0.19783318297800428	'unroll': 3	'update_epoch': 13	'discount': 0.9607670744286329	'lr': 0.0006465307608239084	'entropy': 0.00019013294002678387}. Best is trial 107 with value: -5450.35546875. [0m
[32m[I 2022-01-10 19:14:12	788] [0m Trial 112 finished with value: -3358.27001953125 and parameters: {'r_scaling': 0.10733058846471323	'unroll': 4	'update_epoch': 13	'discount': 0.9521992677712172	'lr': 0.0005007917594018361	'entropy': 0.0006752374926967879}. Best is trial 107 with value: -5450.35546875. [0m
[32m[I 2022-01-10 19:16:33	282] [0m Trial 113 finished with value: -4495.46728515625 and parameters: {'r_scaling': 2.9520105514142996	'unroll': 3	'update_epoch': 14	'discount': 0.9632344021655895	'lr': 0.00043593788402721017	'entropy': 0.00013380058721881307}. Best is trial 107 with value: -5450.35546875. [0m
[32m[I 2022-01-10 19:18:48	724] [0m Trial 114 finished with value: -5044.767578125 and parameters: {'r_scaling': 0.0780087017387947	'unroll': 3	'update_epoch': 12	'discount': 0.973368650359847	'lr': 0.0004077679917624962	'entropy': 0.0003612010630906454}. Best is trial 107 with value: -5450.35546875. [0m
[32m[I 2022-01-10 19:20:42	962] [0m Trial 115 finished with value: 96.56906127929688 and parameters: {'r_scaling': 0.15184212135721645	'unroll': 15	'update_epoch': 13	'discount': 0.9683167655295842	'lr': 0.0004705102491732215	'entropy': 0.0004463765631390156}. Best is trial 107 with value: -5450.35546875. [0m
[32m[I 2022-01-10 19:22:54	451] [0m Trial 116 finished with value: -3232.660400390625 and parameters: {'r_scaling': 0.12359024363097067	'unroll': 4	'update_epoch': 14	'discount': 0.9569522372574146	'lr': 0.0005605089702924285	'entropy': 0.0005820201902410816}. Best is trial 107 with value: -5450.35546875. [0m
[32m[I 2022-01-10 19:25:25	335] [0m Trial 117 finished with value: -5377.6435546875 and parameters: {'r_scaling': 0.35256102819934454	'unroll': 3	'update_epoch': 13	'discount': 0.9620150024865379	'lr': 0.00042847583402173963	'entropy': 0.00028999752339965327}. Best is trial 107 with value: -5450.35546875. [0m
[32m[I 2022-01-10 19:27:34	587] [0m Trial 118 finished with value: -2831.310791015625 and parameters: {'r_scaling': 0.32850319945402356	'unroll': 4	'update_epoch': 12	'discount': 0.9654774638112457	'lr': 0.00038944213430418414	'entropy': 0.00022098975023002136}. Best is trial 107 with value: -5450.35546875. [0m
[32m[I 2022-01-10 19:29:59	833] [0m Trial 119 finished with value: -4865.99072265625 and parameters: {'r_scaling': 0.7702189520444918	'unroll': 3	'update_epoch': 14	'discount': 0.948288513566276	'lr': 0.0004278347449973322	'entropy': 0.0002886903206013924}. Best is trial 107 with value: -5450.35546875. [0m
[32m[I 2022-01-10 19:32:25	981] [0m Trial 120 finished with value: -2955.316162109375 and parameters: {'r_scaling': 0.4509465434013711	'unroll': 2	'update_epoch': 13	'discount': 0.9856917672219142	'lr': 0.0005390544774920415	'entropy': 0.0004858675169035764}. Best is trial 107 with value: -5450.35546875. [0m
[32m[I 2022-01-10 19:34:46	124] [0m Trial 121 finished with value: -5008.310546875 and parameters: {'r_scaling': 0.2566858412651868	'unroll': 3	'update_epoch': 13	'discount': 0.9611840540579645	'lr': 0.00048768582972875127	'entropy': 0.00017976404884759273}. Best is trial 107 with value: -5450.35546875. [0m
[32m[I 2022-01-10 19:36:45	059] [0m Trial 122 finished with value: 98.53965759277344 and parameters: {'r_scaling': 0.08478420967828901	'unroll': 8	'update_epoch': 14	'discount': 0.9631729036593067	'lr': 0.0005873194785102351	'entropy': 0.00038861221088840015}. Best is trial 107 with value: -5450.35546875. [0m
[32m[I 2022-01-10 19:38:47	566] [0m Trial 123 finished with value: -3945.502685546875 and parameters: {'r_scaling': 0.10570081385735362	'unroll': 3	'update_epoch': 12	'discount': 0.9027173329089165	'lr': 0.00045760843703859767	'entropy': 0.0003260942234304337}. Best is trial 107 with value: -5450.35546875. [0m
[32m[I 2022-01-10 19:41:27	169] [0m Trial 124 finished with value: -3306.908203125 and parameters: {'r_scaling': 0.2156847519571285	'unroll': 4	'update_epoch': 13	'discount': 0.957161059832575	'lr': 0.00035953033411430756	'entropy': 0.0002499208133163982}. Best is trial 107 with value: -5450.35546875. [0m
[32m[I 2022-01-10 19:44:28	872] [0m Trial 125 finished with value: -5238.107421875 and parameters: {'r_scaling': 0.37037939972949124	'unroll': 3	'update_epoch': 13	'discount': 0.9600116360460319	'lr': 0.0005163968623683894	'entropy': 0.00042278612982079927}. Best is trial 107 with value: -5450.35546875. [0m
[32m[I 2022-01-10 19:46:49	401] [0m Trial 126 finished with value: -4568.47509765625 and parameters: {'r_scaling': 0.3533825781787386	'unroll': 2	'update_epoch': 14	'discount': 0.9523810718819246	'lr': 0.0006420760928632385	'entropy': 0.001701390016620336}. Best is trial 107 with value: -5450.35546875. [0m
[32m[I 2022-01-10 19:48:58	235] [0m Trial 127 finished with value: -2860.635009765625 and parameters: {'r_scaling': 0.5966227256286263	'unroll': 2	'update_epoch': 13	'discount': 0.9601720548683971	'lr': 0.0005249079705321396	'entropy': 0.0008523532788732293}. Best is trial 107 with value: -5450.35546875. [0m
[32m[I 2022-01-10 19:51:04	153] [0m Trial 128 finished with value: -5411.478515625 and parameters: {'r_scaling': 0.1820825926406142	'unroll': 3	'update_epoch': 14	'discount': 0.9550220328964164	'lr': 0.00039405350031192357	'entropy': 0.0006781571885560973}. Best is trial 107 with value: -5450.35546875. [0m
[32m[I 2022-01-10 19:53:51	081] [0m Trial 129 finished with value: -4971.8720703125 and parameters: {'r_scaling': 0.28265582795955785	'unroll': 3	'update_epoch': 12	'discount': 0.9546051478511303	'lr': 0.0003904760041339171	'entropy': 0.0006638581049487145}. Best is trial 107 with value: -5450.35546875. [0m
[32m[I 2022-01-10 19:55:46	875] [0m Trial 130 finished with value: -2287.37744140625 and parameters: {'r_scaling': 110.77855257703325	'unroll': 5	'update_epoch': 14	'discount': 0.9685006750804186	'lr': 0.00041254309277982443	'entropy': 0.00044100864094140683}. Best is trial 107 with value: -5450.35546875. [0m
[32m[I 2022-01-10 19:58:24	226] [0m Trial 131 finished with value: -5381.341796875 and parameters: {'r_scaling': 0.18554725322524107	'unroll': 3	'update_epoch': 14	'discount': 0.9507724198432043	'lr': 0.0003130357180023589	'entropy': 0.000539228718453825}. Best is trial 107 with value: -5450.35546875. [0m
[32m[I 2022-01-10 20:01:01	877] [0m Trial 132 finished with value: -5169.50537109375 and parameters: {'r_scaling': 0.18575630104315552	'unroll': 3	'update_epoch': 13	'discount': 0.9498730586271691	'lr': 0.0003068280945180592	'entropy': 0.0005611282978539786}. Best is trial 107 with value: -5450.35546875. [0m
[32m[I 2022-01-10 20:02:55	791] [0m Trial 133 finished with value: -2110.749755859375 and parameters: {'r_scaling': 9.54467279553727	'unroll': 4	'update_epoch': 14	'discount': 0.9513525353088226	'lr': 0.0003651492282586732	'entropy': 0.0005029517557091424}. Best is trial 107 with value: -5450.35546875. [0m
[32m[I 2022-01-10 20:05:44	338] [0m Trial 134 finished with value: -5338.0263671875 and parameters: {'r_scaling': 0.220556353720228	'unroll': 3	'update_epoch': 15	'discount': 0.9456801687987398	'lr': 0.0004388323449009846	'entropy': 0.0006770389468207073}. Best is trial 107 with value: -5450.35546875. [0m
[32m[I 2022-01-10 20:07:46	404] [0m Trial 135 finished with value: -2979.370361328125 and parameters: {'r_scaling': 0.22859444897272793	'unroll': 4	'update_epoch': 14	'discount': 0.9466559027518212	'lr': 0.0004361688993496279	'entropy': 0.0007529030950957153}. Best is trial 107 with value: -5450.35546875. [0m
[32m[I 2022-01-10 20:10:27	296] [0m Trial 136 finished with value: -5201.70361328125 and parameters: {'r_scaling': 0.15814582654349288	'unroll': 3	'update_epoch': 15	'discount': 0.945122488860996	'lr': 0.0005031894857684845	'entropy': 0.0006838073950545397}. Best is trial 107 with value: -5450.35546875. [0m
[32m[I 2022-01-10 20:13:04	019] [0m Trial 137 finished with value: -5002.5537109375 and parameters: {'r_scaling': 0.22749831741788273	'unroll': 3	'update_epoch': 15	'discount': 0.9487220911222564	'lr': 0.0003954971958807594	'entropy': 0.0006171228720452056}. Best is trial 107 with value: -5450.35546875. [0m
[32m[I 2022-01-10 20:15:39	212] [0m Trial 138 finished with value: -3507.972900390625 and parameters: {'r_scaling': 0.18892540126415375	'unroll': 2	'update_epoch': 15	'discount': 0.955538495367068	'lr': 0.00044745992616314605	'entropy': 0.0007798832275508634}. Best is trial 107 with value: -5450.35546875. [0m
[32m[I 2022-01-10 20:18:15	449] [0m Trial 139 finished with value: -5579.39599609375 and parameters: {'r_scaling': 0.14514768657108348	'unroll': 3	'update_epoch': 15	'discount': 0.9416302038209099	'lr': 0.0004235709061305231	'entropy': 0.00040079961788040734}. Best is trial 139 with value: -5579.39599609375. [0m
[32m[I 2022-01-10 20:20:41	920] [0m Trial 140 finished with value: -2657.578857421875 and parameters: {'r_scaling': 4.048345997425101	'unroll': 4	'update_epoch': 15	'discount': 0.9420832098078242	'lr': 0.0003588606330098966	'entropy': 0.000560245217170483}. Best is trial 139 with value: -5579.39599609375. [0m
[32m[I 2022-01-10 20:23:32	608] [0m Trial 141 finished with value: -5370.99609375 and parameters: {'r_scaling': 0.1381856265163668	'unroll': 3	'update_epoch': 15	'discount': 0.9536480866910039	'lr': 0.0004231815173866241	'entropy': 0.00039669501215666795}. Best is trial 139 with value: -5579.39599609375. [0m
[32m[I 2022-01-10 20:25:50	220] [0m Trial 142 finished with value: 101.63941955566406 and parameters: {'r_scaling': 0.14409299778513338	'unroll': 9	'update_epoch': 15	'discount': 0.9543458664134837	'lr': 0.000419751903088543	'entropy': 0.00046412659034424195}. Best is trial 139 with value: -5579.39599609375. [0m
[32m[I 2022-01-10 20:28:33	663] [0m Trial 143 finished with value: -5176.26708984375 and parameters: {'r_scaling': 0.10147468039975625	'unroll': 3	'update_epoch': 15	'discount': 0.9535113962292227	'lr': 0.0004749090819688942	'entropy': 0.00040333999524240044}. Best is trial 139 with value: -5579.39599609375. [0m
[32m[I 2022-01-10 20:31:33	941] [0m Trial 144 finished with value: -5376.6513671875 and parameters: {'r_scaling': 0.17187736496351663	'unroll': 3	'update_epoch': 15	'discount': 0.9453398566612704	'lr': 0.0003895648787206077	'entropy': 0.0009346015636910989}. Best is trial 139 with value: -5579.39599609375. [0m
[32m[I 2022-01-10 20:34:08	827] [0m Trial 145 finished with value: -3058.227294921875 and parameters: {'r_scaling': 0.16507330359105332	'unroll': 4	'update_epoch': 15	'discount': 0.9499357308779713	'lr': 0.00032073739319864685	'entropy': 0.0011329877667563936}. Best is trial 139 with value: -5579.39599609375. [0m
[32m[I 2022-01-10 20:36:59	574] [0m Trial 146 finished with value: -4049.1103515625 and parameters: {'r_scaling': 0.2841754254220762	'unroll': 2	'update_epoch': 15	'discount': 0.9452468801264793	'lr': 0.00037116079760993995	'entropy': 0.0009607947846521696}. Best is trial 139 with value: -5579.39599609375. [0m
[32m[I 2022-01-10 20:39:42	045] [0m Trial 147 finished with value: -5234.71533203125 and parameters: {'r_scaling': 0.14183169998859466	'unroll': 3	'update_epoch': 15	'discount': 0.9407390857426883	'lr': 0.00039044199802847464	'entropy': 0.0008818867007177895}. Best is trial 139 with value: -5579.39599609375. [0m
[32m[I 2022-01-10 20:42:40	661] [0m Trial 148 finished with value: -4578.953125 and parameters: {'r_scaling': 0.17942654021692	'unroll': 2	'update_epoch': 15	'discount': 0.9396626614970246	'lr': 0.00038635424292674073	'entropy': 0.0008351672941575689}. Best is trial 139 with value: -5579.39599609375. [0m
[32m[I 2022-01-10 20:45:38	015] [0m Trial 149 finished with value: -3697.18310546875 and parameters: {'r_scaling': 35.38836267859078	'unroll': 3	'update_epoch': 15	'discount': 0.9442857025489889	'lr': 0.0004556351958835079	'entropy': 0.0005296079130019238}. Best is trial 139 with value: -5579.39599609375. [0m
[32m[I 2022-01-10 20:48:18	590] [0m Trial 150 finished with value: -3313.5927734375 and parameters: {'r_scaling': 0.14694043924409694	'unroll': 4	'update_epoch': 15	'discount': 0.9362030461743029	'lr': 0.00041601388137850356	'entropy': 0.000636844238127384}. Best is trial 139 with value: -5579.39599609375. [0m
[32m[I 2022-01-10 20:51:06	619] [0m Trial 151 finished with value: -4914.5224609375 and parameters: {'r_scaling': 0.11147861393800064	'unroll': 3	'update_epoch': 14	'discount': 0.9421000525099492	'lr': 0.0003535312728632591	'entropy': 0.0009135429127253734}. Best is trial 139 with value: -5579.39599609375. [0m
[32m[I 2022-01-10 20:53:47	567] [0m Trial 152 finished with value: -5099.6259765625 and parameters: {'r_scaling': 0.09397181299534689	'unroll': 3	'update_epoch': 15	'discount': 0.9398419621083948	'lr': 0.00039709957338354067	'entropy': 0.0011846238613390492}. Best is trial 139 with value: -5579.39599609375. [0m
[32m[I 2022-01-10 20:56:33	793] [0m Trial 153 finished with value: -4744.3134765625 and parameters: {'r_scaling': 0.1335334217315022	'unroll': 3	'update_epoch': 14	'discount': 0.9474960043346935	'lr': 0.00033380265072635525	'entropy': 0.0007306204079400978}. Best is trial 139 with value: -5579.39599609375. [0m
[32m[I 2022-01-10 20:59:16	071] [0m Trial 154 finished with value: -5105.70849609375 and parameters: {'r_scaling': 0.20094716128260307	'unroll': 2	'update_epoch': 15	'discount': 0.9516332950593656	'lr': 0.0003003743799481678	'entropy': 0.0004382668503410905}. Best is trial 139 with value: -5579.39599609375. [0m
[32m[I 2022-01-10 21:01:51	963] [0m Trial 155 finished with value: -5090.287109375 and parameters: {'r_scaling': 0.16229814539466314	'unroll': 3	'update_epoch': 14	'discount': 0.9566888753741365	'lr': 0.00042849413279620407	'entropy': 0.0003587133125329315}. Best is trial 139 with value: -5579.39599609375. [0m
[32m[I 2022-01-10 21:04:24	672] [0m Trial 156 finished with value: -3324.942626953125 and parameters: {'r_scaling': 0.33803928395433125	'unroll': 3	'update_epoch': 15	'discount': 0.9430298722176772	'lr': 0.00037407011587110503	'entropy': 0.0006043430946162862}. Best is trial 139 with value: -5579.39599609375. [0m
[32m[I 2022-01-10 21:06:40	468] [0m Trial 157 finished with value: 100.44869995117188 and parameters: {'r_scaling': 0.2506872332734295	'unroll': 4	'update_epoch': 14	'discount': 0.9496868292342268	'lr': 0.0019463504357711857	'entropy': 0.0005190603522535489}. Best is trial 139 with value: -5579.39599609375. [0m
[32m[I 2022-01-10 21:09:09	378] [0m Trial 158 finished with value: -5178.30224609375 and parameters: {'r_scaling': 0.1321560697133444	'unroll': 3	'update_epoch': 15	'discount': 0.9525159264620937	'lr': 0.0005086716528528362	'entropy': 0.0010206103439736474}. Best is trial 139 with value: -5579.39599609375. [0m
[32m[I 2022-01-10 21:11:33	652] [0m Trial 159 finished with value: -4253.04638671875 and parameters: {'r_scaling': 0.07921982778056527	'unroll': 2	'update_epoch': 14	'discount': 0.9462960353070828	'lr': 0.00046916881800829153	'entropy': 0.0007756444310700667}. Best is trial 139 with value: -5579.39599609375. [0m
[32m[I 2022-01-10 21:13:39	637] [0m Trial 160 finished with value: -3171.94189453125 and parameters: {'r_scaling': 0.11412392360147595	'unroll': 4	'update_epoch': 14	'discount': 0.9559793680744416	'lr': 0.00043806527759067567	'entropy': 0.0003911424334359463}. Best is trial 139 with value: -5579.39599609375. [0m
[32m[I 2022-01-10 21:15:46	696] [0m Trial 161 finished with value: -5321.6416015625 and parameters: {'r_scaling': 0.18678434845191588	'unroll': 3	'update_epoch': 15	'discount': 0.959328752456061	'lr': 0.00040526099949923805	'entropy': 0.000309363114404262}. Best is trial 139 with value: -5579.39599609375. [0m
[32m[I 2022-01-10 21:18:17	310] [0m Trial 162 finished with value: -5302.2333984375 and parameters: {'r_scaling': 0.19779286807864158	'unroll': 3	'update_epoch': 15	'discount': 0.9592311997657478	'lr': 0.0004043133558371925	'entropy': 0.0003240118736211292}. Best is trial 139 with value: -5579.39599609375. [0m
[32m[I 2022-01-10 21:20:39	066] [0m Trial 163 finished with value: -5380.607421875 and parameters: {'r_scaling': 0.20257704785943484	'unroll': 3	'update_epoch': 15	'discount': 0.9599474064105823	'lr': 0.00045556458330071366	'entropy': 0.0003065648314823342}. Best is trial 139 with value: -5579.39599609375. [0m
[32m[I 2022-01-10 21:23:08	267] [0m Trial 164 finished with value: -5397.5615234375 and parameters: {'r_scaling': 0.19825330155104293	'unroll': 3	'update_epoch': 15	'discount': 0.9598147852782081	'lr': 0.00045907252430617523	'entropy': 0.00031459679826166136}. Best is trial 139 with value: -5579.39599609375. [0m
[32m[I 2022-01-10 21:25:38	276] [0m Trial 165 finished with value: -5165.00244140625 and parameters: {'r_scaling': 0.19208260834681615	'unroll': 3	'update_epoch': 15	'discount': 0.9581411039769867	'lr': 0.00045700593905998946	'entropy': 0.00035529728244747765}. Best is trial 139 with value: -5579.39599609375. [0m
[32m[I 2022-01-10 21:28:09	307] [0m Trial 166 finished with value: -4279.7880859375 and parameters: {'r_scaling': 0.24291456211901524	'unroll': 2	'update_epoch': 15	'discount': 0.9617858792160375	'lr': 0.0004107337373296093	'entropy': 0.00030400678711420726}. Best is trial 139 with value: -5579.39599609375. [0m
[32m[I 2022-01-10 21:30:19	220] [0m Trial 167 finished with value: -3141.03271484375 and parameters: {'r_scaling': 0.17413600995176703	'unroll': 4	'update_epoch': 15	'discount': 0.9598756495763324	'lr': 0.00048061757987526453	'entropy': 0.0003096360660593779}. Best is trial 139 with value: -5579.39599609375. [0m
[32m[I 2022-01-10 21:32:43	568] [0m Trial 168 finished with value: -5271.73095703125 and parameters: {'r_scaling': 0.30805000879354905	'unroll': 3	'update_epoch': 15	'discount': 0.9580900524427695	'lr': 0.00042959307821012824	'entropy': 0.00022933461420835823}. Best is trial 139 with value: -5579.39599609375. [0m
[32m[I 2022-01-10 21:35:16	451] [0m Trial 169 finished with value: -3435.841064453125 and parameters: {'r_scaling': 0.2997667492680713	'unroll': 2	'update_epoch': 15	'discount': 0.9541592091114438	'lr': 0.0004360084781723811	'entropy': 0.00021411356741732248}. Best is trial 139 with value: -5579.39599609375. [0m
[32m[I 2022-01-10 21:37:44	316] [0m Trial 170 finished with value: -5386.3720703125 and parameters: {'r_scaling': 0.21390833437243903	'unroll': 3	'update_epoch': 15	'discount': 0.9622240663252329	'lr': 0.00047824627094892176	'entropy': 0.0002401169122533305}. Best is trial 139 with value: -5579.39599609375. [0m
[32m[I 2022-01-10 21:40:22	430] [0m Trial 171 finished with value: -4872.8681640625 and parameters: {'r_scaling': 0.22701602414661168	'unroll': 3	'update_epoch': 15	'discount': 0.9624544920505453	'lr': 0.0004878825210873793	'entropy': 0.00023001890666903363}. Best is trial 139 with value: -5579.39599609375. [0m
[32m[I 2022-01-10 21:42:29	671] [0m Trial 172 finished with value: -2939.82275390625 and parameters: {'r_scaling': 0.19994954868053538	'unroll': 3	'update_epoch': 15	'discount': 0.9570051314683102	'lr': 0.00045617386305959096	'entropy': 0.00032681318208161196}. Best is trial 139 with value: -5579.39599609375. [0m
[32m[I 2022-01-10 21:44:21	740] [0m Trial 173 finished with value: 98.56753540039062 and parameters: {'r_scaling': 0.2843577657999991	'unroll': 10	'update_epoch': 15	'discount': 0.9596587880633937	'lr': 0.0005435340541602337	'entropy': 0.00019691513931161745}. Best is trial 139 with value: -5579.39599609375. [0m
[32m[I 2022-01-10 21:47:04	439] [0m Trial 174 finished with value: -5381.2900390625 and parameters: {'r_scaling': 0.15693643147527447	'unroll': 3	'update_epoch': 15	'discount': 0.9562543722826566	'lr': 0.0004127520617692413	'entropy': 0.00023496076941325868}. Best is trial 139 with value: -5579.39599609375. [0m
[32m[I 2022-01-10 21:49:49	085] [0m Trial 175 finished with value: -3124.60546875 and parameters: {'r_scaling': 0.15660539136894186	'unroll': 7	'update_epoch': 14	'discount': 0.9554002533747843	'lr': 0.0004048773968983658	'entropy': 0.00025683887605805516}. Best is trial 139 with value: -5579.39599609375. [0m
[32m[I 2022-01-10 21:52:21	573] [0m Trial 176 finished with value: -3481.94287109375 and parameters: {'r_scaling': 0.21021948624227924	'unroll': 4	'update_epoch': 15	'discount': 0.9616582050753012	'lr': 0.0005051454352643565	'entropy': 0.00015296249950494238}. Best is trial 139 with value: -5579.39599609375. [0m
[32m[I 2022-01-10 21:54:51	139] [0m Trial 177 finished with value: -4772.1650390625 and parameters: {'r_scaling': 0.12530882711684466	'unroll': 3	'update_epoch': 8	'discount': 0.9632074495274425	'lr': 0.00045758549386486127	'entropy': 0.00028972887251745076}. Best is trial 139 with value: -5579.39599609375. [0m
[32m[I 2022-01-10 21:57:29	521] [0m Trial 178 finished with value: -5101.60400390625 and parameters: {'r_scaling': 0.16856747932150143	'unroll': 3	'update_epoch': 15	'discount': 0.953758047481568	'lr': 0.00041586281959138984	'entropy': 0.0003629391134808721}. Best is trial 139 with value: -5579.39599609375. [0m
[32m[I 2022-01-10 22:00:11	243] [0m Trial 179 finished with value: -5182.22412109375 and parameters: {'r_scaling': 2.3361700416422853	'unroll': 2	'update_epoch': 14	'discount': 0.9568729785845403	'lr': 0.0003742253415751196	'entropy': 0.0004750943130335983}. Best is trial 139 with value: -5579.39599609375. [0m
[32m[I 2022-01-10 22:02:46	253] [0m Trial 180 finished with value: -4264.16064453125 and parameters: {'r_scaling': 0.2253376410963203	'unroll': 3	'update_epoch': 14	'discount': 0.9600264638784901	'lr': 0.0004819222216414806	'entropy': 0.0003171044273824725}. Best is trial 139 with value: -5579.39599609375. [0m
[32m[I 2022-01-10 22:05:30	270] [0m Trial 181 finished with value: -5341.392578125 and parameters: {'r_scaling': 0.26682810750129915	'unroll': 3	'update_epoch': 15	'discount': 0.9581761498701359	'lr': 0.0004339146986264767	'entropy': 0.00024312329649976423}. Best is trial 139 with value: -5579.39599609375. [0m
[32m[I 2022-01-10 22:08:02	362] [0m Trial 182 finished with value: -5184.1875 and parameters: {'r_scaling': 0.25727438512531986	'unroll': 3	'update_epoch': 15	'discount': 0.9582376964905734	'lr': 0.0004390797803026877	'entropy': 0.00025587320310041387}. Best is trial 139 with value: -5579.39599609375. [0m
[32m[I 2022-01-10 22:10:35	095] [0m Trial 183 finished with value: -5286.73193359375 and parameters: {'r_scaling': 0.14724740729626598	'unroll': 3	'update_epoch': 15	'discount': 0.9561565547692523	'lr': 0.0003950948696902003	'entropy': 0.0001781265991534667}. Best is trial 139 with value: -5579.39599609375. [0m
[32m[I 2022-01-10 22:13:11	271] [0m Trial 184 finished with value: -4546.6884765625 and parameters: {'r_scaling': 0.19092433099961584	'unroll': 2	'update_epoch': 15	'discount': 0.9546133928797449	'lr': 0.00039663707043124095	'entropy': 0.00018795796230216855}. Best is trial 139 with value: -5579.39599609375. [0m
[32m[I 2022-01-10 22:15:30	500] [0m Trial 185 finished with value: -3287.662841796875 and parameters: {'r_scaling': 0.1503511641779968	'unroll': 4	'update_epoch': 15	'discount': 0.9507777771672172	'lr': 0.0003790415159356182	'entropy': 0.000126343562149508}. Best is trial 139 with value: -5579.39599609375. [0m
[32m[I 2022-01-10 22:17:26	720] [0m Trial 186 finished with value: 98.34747314453125 and parameters: {'r_scaling': 0.17144432922997369	'unroll': 11	'update_epoch': 15	'discount': 0.9554772017153271	'lr': 0.00041112157721410336	'entropy': 0.00016815298098641883}. Best is trial 139 with value: -5579.39599609375. [0m
[32m[I 2022-01-10 22:19:51	585] [0m Trial 187 finished with value: -5590.0498046875 and parameters: {'r_scaling': 0.24929620535080937	'unroll': 3	'update_epoch': 15	'discount': 0.9598325706157995	'lr': 0.00044742481278110076	'entropy': 0.000244946286464613}. Best is trial 187 with value: -5590.0498046875. [0m
[32m[I 2022-01-10 22:22:14	886] [0m Trial 188 finished with value: -5066.48095703125 and parameters: {'r_scaling': 1.4819173144959206	'unroll': 3	'update_epoch': 15	'discount': 0.9637873968215183	'lr': 0.0004542440810654294	'entropy': 0.00021513290863247562}. Best is trial 187 with value: -5590.0498046875. [0m
[32m[I 2022-01-10 22:24:34	195] [0m Trial 189 finished with value: -5152.4140625 and parameters: {'r_scaling': 0.25078377683642356	'unroll': 3	'update_epoch': 14	'discount': 0.9606094396548268	'lr': 0.00043245475226556443	'entropy': 0.00028075603140005184}. Best is trial 187 with value: -5590.0498046875. [0m
[32m[I 2022-01-10 22:27:17	074] [0m Trial 190 finished with value: -3479.467529296875 and parameters: {'r_scaling': 0.21054420766094314	'unroll': 2	'update_epoch': 15	'discount': 0.952951744461397	'lr': 0.0005169756902103699	'entropy': 0.00024580605163032284}. Best is trial 187 with value: -5590.0498046875. [0m
[32m[I 2022-01-10 22:29:43	442] [0m Trial 191 finished with value: -5241.88134765625 and parameters: {'r_scaling': 0.14081035598217448	'unroll': 3	'update_epoch': 15	'discount': 0.95619043385953	'lr': 0.0004019611021704565	'entropy': 0.00021089871528541686}. Best is trial 187 with value: -5590.0498046875. [0m
[32m[I 2022-01-10 22:31:51	194] [0m Trial 192 finished with value: -5328.91552734375 and parameters: {'r_scaling': 0.26246576275426414	'unroll': 3	'update_epoch': 15	'discount': 0.9595656014921806	'lr': 0.00046660663726312974	'entropy': 0.0003210108348982658}. Best is trial 187 with value: -5590.0498046875. [0m
[32m[I 2022-01-10 22:34:16	956] [0m Trial 193 finished with value: -5246.0361328125 and parameters: {'r_scaling': 0.3260413579500924	'unroll': 3	'update_epoch': 15	'discount': 0.9613050423533324	'lr': 0.0004804251025406312	'entropy': 0.0003341132446416709}. Best is trial 187 with value: -5590.0498046875. [0m
[32m[I 2022-01-10 22:36:39	913] [0m Trial 194 finished with value: -5340.07421875 and parameters: {'r_scaling': 0.4175458342804892	'unroll': 3	'update_epoch': 15	'discount': 0.9588942213606994	'lr': 0.0004663813351908855	'entropy': 0.00040723219937039464}. Best is trial 187 with value: -5590.0498046875. [0m
[32m[I 2022-01-10 22:38:40	169] [0m Trial 195 finished with value: -2343.572998046875 and parameters: {'r_scaling': 0.259904857097132	'unroll': 4	'update_epoch': 4	'discount': 0.9643945326578716	'lr': 0.0005305707517227555	'entropy': 0.00038786763004625775}. Best is trial 187 with value: -5590.0498046875. [0m
[32m[I 2022-01-10 22:41:04	078] [0m Trial 196 finished with value: -3978.751953125 and parameters: {'r_scaling': 0.5388919674847259	'unroll': 3	'update_epoch': 14	'discount': 0.9483076553708487	'lr': 0.000453192265298403	'entropy': 0.0002919386067029514}. Best is trial 187 with value: -5590.0498046875. [0m
[32m[I 2022-01-10 22:43:32	549] [0m Trial 197 finished with value: -4551.9775390625 and parameters: {'r_scaling': 0.4080095809038071	'unroll': 2	'update_epoch': 15	'discount': 0.9590212827552438	'lr': 0.00047523852399385255	'entropy': 0.0003928145561074406}. Best is trial 187 with value: -5590.0498046875. [0m
[32m[I 2022-01-10 22:45:59	737] [0m Trial 198 finished with value: -5427.21728515625 and parameters: {'r_scaling': 0.28670165236829775	'unroll': 3	'update_epoch': 15	'discount': 0.9619848227303861	'lr': 0.00042991796472605093	'entropy': 0.0002559906939916125}. Best is trial 187 with value: -5590.0498046875. [0m
[32m[I 2022-01-10 22:48:13	563] [0m Trial 199 finished with value: -3258.641357421875 and parameters: {'r_scaling': 0.34579404808890774	'unroll': 4	'update_epoch': 15	'discount': 0.9628114439240854	'lr': 0.0004289794612305918	'entropy': 0.00026606906643086847}. Best is trial 187 with value: -5590.0498046875. [0m
