# Supplementary material
Source: ML conference proceedings conference paper supplement (https://proceedings.neurips.cc/paper_files/paper/2022/hash/10a6bdcabbd5a3d36b760daa295f63c1-Abstract.html)
Supplement: Supplementary file 1 [file 10a6bdcabbd5a3d36b760daa295f63c1-Supplemental-Conference.zip › neurips2022/code/robotics_code/hp_searches/ant_10M.log]

[32m[I 2021-12-10 16:04:51	456] [0m A new study created in memory with name: no-name-49512fc4-96b9-441c-bfb7-e8aefa04b863 [0m
[32m[I 2021-12-10 16:06:33	561] [0m Trial 0 finished with value: -2403.9423828125 and parameters: {'r_scaling': 1.688476613853382	'unroll': 15	'update_epoch': 8	'discount': 0.94957531154995	'lr': 0.00016413028315314117	'entropy': 0.0002450779203642406}. Best is trial 0 with value: -2403.9423828125. [0m
[32m[I 2021-12-10 16:08:13	302] [0m Trial 1 finished with value: -2384.87548828125 and parameters: {'r_scaling': 0.13729657089219557	'unroll': 10	'update_epoch': 14	'discount': 0.9199248747896916	'lr': 0.00029370902794949316	'entropy': 0.011438942198085063}. Best is trial 0 with value: -2403.9423828125. [0m
[32m[I 2021-12-10 16:09:45	967] [0m Trial 2 finished with value: -2487.876708984375 and parameters: {'r_scaling': 3.2108897008841844	'unroll': 8	'update_epoch': 11	'discount': 0.9019504256659467	'lr': 0.0002154305980623109	'entropy': 0.033132134112567095}. Best is trial 2 with value: -2487.876708984375. [0m
[32m[I 2021-12-10 16:11:55	222] [0m Trial 3 finished with value: -5461.69775390625 and parameters: {'r_scaling': 104.66904593866288	'unroll': 4	'update_epoch': 15	'discount': 0.9860793593646617	'lr': 0.0004933744825568557	'entropy': 0.0011325291362612375}. Best is trial 3 with value: -5461.69775390625. [0m
[32m[I 2021-12-10 16:13:47	200] [0m Trial 4 finished with value: -2641.529296875 and parameters: {'r_scaling': 17.400233562835297	'unroll': 3	'update_epoch': 6	'discount': 0.9721312560150853	'lr': 0.00012274753934006107	'entropy': 0.03494243053509183}. Best is trial 3 with value: -5461.69775390625. [0m
[32m[I 2021-12-10 16:15:37	138] [0m Trial 5 finished with value: -4575.61962890625 and parameters: {'r_scaling': 0.26545057511889225	'unroll': 5	'update_epoch': 7	'discount': 0.9010070529867179	'lr': 0.0005341846999974148	'entropy': 0.008381250889713709}. Best is trial 3 with value: -5461.69775390625. [0m
[32m[I 2021-12-10 16:17:12	081] [0m Trial 6 finished with value: -4221.99365234375 and parameters: {'r_scaling': 0.23598221177263745	'unroll': 6	'update_epoch': 4	'discount': 0.9212145847909626	'lr': 0.0008281130661975253	'entropy': 0.004737352646685964}. Best is trial 3 with value: -5461.69775390625. [0m
[32m[I 2021-12-10 16:19:32	565] [0m Trial 7 finished with value: -4943.37451171875 and parameters: {'r_scaling': 4.326314555685204	'unroll': 3	'update_epoch': 12	'discount': 0.9721076105874707	'lr': 0.0006555854535951785	'entropy': 0.003310621034209136}. Best is trial 3 with value: -5461.69775390625. [0m
[32m[I 2021-12-10 16:21:29	929] [0m Trial 8 finished with value: -2282.20068359375 and parameters: {'r_scaling': 1.8707842296673178	'unroll': 12	'update_epoch': 15	'discount': 0.9464931593759782	'lr': 0.00017131390203831715	'entropy': 0.048789983183251256}. Best is trial 3 with value: -5461.69775390625. [0m
[32m[I 2021-12-10 16:22:57	851] [0m Trial 9 finished with value: -613.3223266601562 and parameters: {'r_scaling': 13.638032116293058	'unroll': 4	'update_epoch': 1	'discount': 0.9446812013709821	'lr': 0.0009886581733287612	'entropy': 0.00019270704856232942}. Best is trial 3 with value: -5461.69775390625. [0m
[32m[I 2021-12-10 16:25:15	035] [0m Trial 10 finished with value: 41.94938659667969 and parameters: {'r_scaling': 175.67685095788107	'unroll': 1	'update_epoch': 10	'discount': 0.9945821687801928	'lr': 0.0013524515045286805	'entropy': 0.0010734768484612503}. Best is trial 3 with value: -5461.69775390625. [0m
[32m[I 2021-12-10 16:27:35	779] [0m Trial 11 finished with value: -2683.174072265625 and parameters: {'r_scaling': 173.49050139918634	'unroll': 2	'update_epoch': 12	'discount': 0.991097655925802	'lr': 0.00046896981692466725	'entropy': 0.0011718505583456227}. Best is trial 3 with value: -5461.69775390625. [0m
[32m[I 2021-12-10 16:29:39	428] [0m Trial 12 finished with value: 103.2303237915039 and parameters: {'r_scaling': 33.456057397819166	'unroll': 6	'update_epoch': 13	'discount': 0.9705677812177853	'lr': 0.0018936854780122257	'entropy': 0.0014496447894425124}. Best is trial 3 with value: -5461.69775390625. [0m
[32m[I 2021-12-10 16:32:27	193] [0m Trial 13 finished with value: -2669.849609375 and parameters: {'r_scaling': 47.86031820070158	'unroll': 1	'update_epoch': 15	'discount': 0.9768338806401532	'lr': 0.0007068281274102484	'entropy': 0.0004698224289945738}. Best is trial 3 with value: -5461.69775390625. [0m
[32m[I 2021-12-10 16:34:06	990] [0m Trial 14 finished with value: -2550.326904296875 and parameters: {'r_scaling': 5.647674320165407	'unroll': 8	'update_epoch': 10	'discount': 0.9621860316294577	'lr': 0.0003370038753629141	'entropy': 0.003083141547904212}. Best is trial 3 with value: -5461.69775390625. [0m
[32m[I 2021-12-10 16:36:14	034] [0m Trial 15 finished with value: -4658.021484375 and parameters: {'r_scaling': 0.8108919233039336	'unroll': 4	'update_epoch': 13	'discount': 0.9806402140619764	'lr': 0.0006090199948652137	'entropy': 0.0005697354954818965}. Best is trial 3 with value: -5461.69775390625. [0m
[32m[I 2021-12-10 16:38:05	915] [0m Trial 16 finished with value: -4913.3603515625 and parameters: {'r_scaling': 68.67825737086004	'unroll': 6	'update_epoch': 10	'discount': 0.9588581982503374	'lr': 0.00040980288185612655	'entropy': 0.0025070709358826163}. Best is trial 3 with value: -5461.69775390625. [0m
[32m[I 2021-12-10 16:40:26	930] [0m Trial 17 finished with value: 23.817161560058594 and parameters: {'r_scaling': 9.046304541804504	'unroll': 3	'update_epoch': 12	'discount': 0.9808265611255654	'lr': 0.000989872793991868	'entropy': 0.012437285311697494}. Best is trial 3 with value: -5461.69775390625. [0m
[32m[I 2021-12-10 16:42:14	407] [0m Trial 18 finished with value: -2678.468994140625 and parameters: {'r_scaling': 0.6732670477938075	'unroll': 8	'update_epoch': 15	'discount': 0.9619891980774735	'lr': 0.00025714987581625467	'entropy': 0.00011145132281409413}. Best is trial 3 with value: -5461.69775390625. [0m
[32m[I 2021-12-10 16:44:40	359] [0m Trial 19 finished with value: -4239.6328125 and parameters: {'r_scaling': 79.33242367268285	'unroll': 3	'update_epoch': 13	'discount': 0.987313718424429	'lr': 0.00038514590227889926	'entropy': 0.09655536805098773}. Best is trial 3 with value: -5461.69775390625. [0m
[32m[I 2021-12-10 16:46:19	476] [0m Trial 20 finished with value: -2530.397216796875 and parameters: {'r_scaling': 0.05242076817336874	'unroll': 10	'update_epoch': 9	'discount': 0.9318850905152579	'lr': 0.0012542878084729158	'entropy': 0.005857282280118668}. Best is trial 3 with value: -5461.69775390625. [0m
[32m[I 2021-12-10 16:48:15	166] [0m Trial 21 finished with value: -4716.40673828125 and parameters: {'r_scaling': 81.04971385043861	'unroll': 6	'update_epoch': 11	'discount': 0.9602355251153377	'lr': 0.0004438266966049988	'entropy': 0.0025635282570530427}. Best is trial 3 with value: -5461.69775390625. [0m
[32m[I 2021-12-10 16:50:14	557] [0m Trial 22 finished with value: -6433.7978515625 and parameters: {'r_scaling': 28.58888065206147	'unroll': 5	'update_epoch': 9	'discount': 0.9534943569160372	'lr': 0.0006154657218182892	'entropy': 0.0020518745599725384}. Best is trial 22 with value: -6433.7978515625. [0m
[32m[I 2021-12-10 16:51:55	560] [0m Trial 23 finished with value: -4885.85791015625 and parameters: {'r_scaling': 28.552356716036623	'unroll': 5	'update_epoch': 4	'discount': 0.9697850241750748	'lr': 0.000726495393633724	'entropy': 0.0007302005900365848}. Best is trial 22 with value: -6433.7978515625. [0m
[32m[I 2021-12-10 16:53:47	840] [0m Trial 24 finished with value: -2461.7236328125 and parameters: {'r_scaling': 7.774510582171544	'unroll': 2	'update_epoch': 8	'discount': 0.9522281271166714	'lr': 0.0006200362858371883	'entropy': 0.0017935369598353287}. Best is trial 22 with value: -6433.7978515625. [0m
[32m[I 2021-12-10 16:55:56	522] [0m Trial 25 finished with value: 98.12655639648438 and parameters: {'r_scaling': 19.925775106290995	'unroll': 4	'update_epoch': 14	'discount': 0.9389905977209931	'lr': 0.0008529354484727944	'entropy': 0.018350524351051573}. Best is trial 22 with value: -6433.7978515625. [0m
[32m[I 2021-12-10 16:57:41	246] [0m Trial 26 finished with value: 112.685302734375 and parameters: {'r_scaling': 3.5297377745171654	'unroll': 7	'update_epoch': 6	'discount': 0.9878875025490517	'lr': 0.0012064033935094871	'entropy': 0.004940726183333237}. Best is trial 22 with value: -6433.7978515625. [0m
[32m[I 2021-12-10 17:00:01	329] [0m Trial 27 finished with value: -2904.392333984375 and parameters: {'r_scaling': 174.18237547651444	'unroll': 2	'update_epoch': 12	'discount': 0.9674227012094316	'lr': 0.0005284776048678962	'entropy': 0.00040325755955014663}. Best is trial 22 with value: -6433.7978515625. [0m
[32m[I 2021-12-10 17:02:18	503] [0m Trial 28 finished with value: -6233.5859375 and parameters: {'r_scaling': 39.39949852361524	'unroll': 5	'update_epoch': 14	'discount': 0.9818746625914709	'lr': 0.00035183477037001803	'entropy': 0.0008549295693353039}. Best is trial 22 with value: -6433.7978515625. [0m
[32m[I 2021-12-10 17:03:50	882] [0m Trial 29 finished with value: -1647.68994140625 and parameters: {'r_scaling': 41.93767050192455	'unroll': 13	'update_epoch': 2	'discount': 0.9534847292056233	'lr': 0.0002237758077957241	'entropy': 0.00030668165496395146}. Best is trial 22 with value: -6433.7978515625. [0m
[32m[I 2021-12-10 17:05:56	732] [0m Trial 30 finished with value: -3122.928466796875 and parameters: {'r_scaling': 82.3654514486328	'unroll': 15	'update_epoch': 14	'discount': 0.9813600071405687	'lr': 0.0003380491070763949	'entropy': 0.0009569404466656774}. Best is trial 22 with value: -6433.7978515625. [0m
[32m[I 2021-12-10 17:08:15	301] [0m Trial 31 finished with value: -6157.8203125 and parameters: {'r_scaling': 12.198455774892109	'unroll': 5	'update_epoch': 14	'discount': 0.9774212559642693	'lr': 0.0005177843231745486	'entropy': 0.001779094750213554}. Best is trial 22 with value: -6433.7978515625. [0m
[32m[I 2021-12-10 17:10:23	572] [0m Trial 32 finished with value: -5896.34765625 and parameters: {'r_scaling': 11.230227205392884	'unroll': 5	'update_epoch': 14	'discount': 0.9856607802896866	'lr': 0.0003076017665424951	'entropy': 0.0018058685243671523}. Best is trial 22 with value: -6433.7978515625. [0m
[32m[I 2021-12-10 17:12:08	953] [0m Trial 33 finished with value: -2836.595947265625 and parameters: {'r_scaling': 12.477734647771785	'unroll': 9	'update_epoch': 14	'discount': 0.9763535605575803	'lr': 0.0002960257392681065	'entropy': 0.0018519344847826294}. Best is trial 22 with value: -6433.7978515625. [0m
[32m[I 2021-12-10 17:14:13	603] [0m Trial 34 finished with value: -4859.87890625 and parameters: {'r_scaling': 25.3554729307867	'unroll': 7	'update_epoch': 11	'discount': 0.9942811573238117	'lr': 0.0003465547389478018	'entropy': 0.0007180642737853363}. Best is trial 22 with value: -6433.7978515625. [0m
[32m[I 2021-12-10 17:16:32	221] [0m Trial 35 finished with value: -6006.32568359375 and parameters: {'r_scaling': 7.320774300552319	'unroll': 5	'update_epoch': 14	'discount': 0.9264807681214486	'lr': 0.0002622484801676014	'entropy': 0.0018866413730509056}. Best is trial 22 with value: -6433.7978515625. [0m
[32m[I 2021-12-10 17:18:30	117] [0m Trial 36 finished with value: -3547.906982421875 and parameters: {'r_scaling': 2.2631110362360594	'unroll': 7	'update_epoch': 13	'discount': 0.9088425350512654	'lr': 0.0001760183184427034	'entropy': 0.007477473985666838}. Best is trial 22 with value: -6433.7978515625. [0m
[32m[I 2021-12-10 17:20:30	988] [0m Trial 37 finished with value: -3134.672119140625 and parameters: {'r_scaling': 6.4004061277314825	'unroll': 5	'update_epoch': 9	'discount': 0.9287939111635991	'lr': 0.00011381297314680214	'entropy': 0.0038192448912541675}. Best is trial 22 with value: -6433.7978515625. [0m
[32m[I 2021-12-10 17:22:05	506] [0m Trial 38 finished with value: -2251.45458984375 and parameters: {'r_scaling': 18.141701092745564	'unroll': 10	'update_epoch': 7	'discount': 0.9132305761595692	'lr': 0.0002368367574441246	'entropy': 0.0007663143563254912}. Best is trial 22 with value: -6433.7978515625. [0m
[32m[I 2021-12-10 17:23:48	886] [0m Trial 39 finished with value: -2936.030517578125 and parameters: {'r_scaling': 1.0740488972034863	'unroll': 5	'update_epoch': 5	'discount': 0.9395272988143668	'lr': 0.00014428659130484196	'entropy': 0.0002245942080178195}. Best is trial 22 with value: -6433.7978515625. [0m
[32m[I 2021-12-10 17:26:02	378] [0m Trial 40 finished with value: -4154.36279296875 and parameters: {'r_scaling': 48.685157933993544	'unroll': 4	'update_epoch': 15	'discount': 0.9235687503896945	'lr': 0.00020203749241731958	'entropy': 0.0014535343301565861}. Best is trial 22 with value: -6433.7978515625. [0m
[32m[I 2021-12-10 17:28:07	022] [0m Trial 41 finished with value: -5192.548828125 and parameters: {'r_scaling': 10.398726309088667	'unroll': 6	'update_epoch': 14	'discount': 0.9766565289810454	'lr': 0.00025983901599056205	'entropy': 0.002066093905074661}. Best is trial 22 with value: -6433.7978515625. [0m
[32m[I 2021-12-10 17:30:11	035] [0m Trial 42 finished with value: -6110.458984375 and parameters: {'r_scaling': 4.998405536608814	'unroll': 5	'update_epoch': 13	'discount': 0.9843029604167876	'lr': 0.0002823424605634219	'entropy': 0.001570161393617494}. Best is trial 22 with value: -6433.7978515625. [0m
[32m[I 2021-12-10 17:32:19	587] [0m Trial 43 finished with value: -6270.7958984375 and parameters: {'r_scaling': 2.5477069725982004	'unroll': 7	'update_epoch': 13	'discount': 0.9657638077663195	'lr': 0.00038971165303396777	'entropy': 0.001324390709152221}. Best is trial 22 with value: -6433.7978515625. [0m
[32m[I 2021-12-10 17:34:27	162] [0m Trial 44 finished with value: -5737.0302734375 and parameters: {'r_scaling': 4.666366548252847	'unroll': 7	'update_epoch': 13	'discount': 0.9665964707671388	'lr': 0.0005636575100939919	'entropy': 0.0012649623488261608}. Best is trial 22 with value: -6433.7978515625. [0m
[32m[I 2021-12-10 17:36:08	845] [0m Trial 45 finished with value: -2592.174560546875 and parameters: {'r_scaling': 2.6157285750852046	'unroll': 9	'update_epoch': 12	'discount': 0.9544992608458654	'lr': 0.00038885134117974446	'entropy': 0.0009559540932376682}. Best is trial 22 with value: -6433.7978515625. [0m
[32m[I 2021-12-10 17:38:08	387] [0m Trial 46 finished with value: -5826.1748046875 and parameters: {'r_scaling': 1.6810306370735328	'unroll': 4	'update_epoch': 11	'discount': 0.9738957876183655	'lr': 0.00047415890132954146	'entropy': 0.0003758845362336918}. Best is trial 22 with value: -6433.7978515625. [0m
[32m[I 2021-12-10 17:40:00	304] [0m Trial 47 finished with value: -5826.6591796875 and parameters: {'r_scaling': 1.5273582751471824	'unroll': 6	'update_epoch': 9	'discount': 0.983442481990375	'lr': 0.0004126582184091889	'entropy': 0.0037775977864928797}. Best is trial 22 with value: -6433.7978515625. [0m
[32m[I 2021-12-10 17:42:25	968] [0m Trial 48 finished with value: -5298.02392578125 and parameters: {'r_scaling': 0.3444377709997632	'unroll': 3	'update_epoch': 13	'discount': 0.966402931835003	'lr': 0.0005234001596931325	'entropy': 0.0005089776630865355}. Best is trial 22 with value: -6433.7978515625. [0m
[32m[I 2021-12-10 17:44:40	573] [0m Trial 49 finished with value: -5767.0712890625 and parameters: {'r_scaling': 20.599185923735114	'unroll': 7	'update_epoch': 15	'discount': 0.9569224474152277	'lr': 0.0007223195771642259	'entropy': 0.0029785679273443733}. Best is trial 22 with value: -6433.7978515625. [0m
[32m[I 2021-12-10 17:46:24	658] [0m Trial 50 finished with value: -2014.6300048828125 and parameters: {'r_scaling': 4.740728731364233	'unroll': 9	'update_epoch': 11	'discount': 0.9488958679902674	'lr': 0.00019982585776952237	'entropy': 0.0014022013777050505}. Best is trial 22 with value: -6433.7978515625. [0m
[32m[I 2021-12-10 17:48:42	103] [0m Trial 51 finished with value: -6502.11083984375 and parameters: {'r_scaling': 7.344222826450623	'unroll': 5	'update_epoch': 14	'discount': 0.9438609306453372	'lr': 0.00025755795094599475	'entropy': 0.002309490772437814}. Best is trial 51 with value: -6502.11083984375. [0m
[32m[I 2021-12-10 17:50:29	839] [0m Trial 52 finished with value: -5861.18408203125 and parameters: {'r_scaling': 3.4551378134947286	'unroll': 6	'update_epoch': 12	'discount': 0.9415721955885468	'lr': 0.0003208918441985504	'entropy': 0.0023974531784233984}. Best is trial 51 with value: -6502.11083984375. [0m
[32m[I 2021-12-10 17:52:50	101] [0m Trial 53 finished with value: -5673.2060546875 and parameters: {'r_scaling': 33.290040042262504	'unroll': 5	'update_epoch': 15	'discount': 0.9902057190446503	'lr': 0.0003769964596150965	'entropy': 0.0008941462711474704}. Best is trial 51 with value: -6502.11083984375. [0m
[32m[I 2021-12-10 17:55:19	918] [0m Trial 54 finished with value: -5789.29833984375 and parameters: {'r_scaling': 13.928473966696831	'unroll': 3	'update_epoch': 13	'discount': 0.978565389003006	'lr': 0.00045285580270548157	'entropy': 0.0006052058806565537}. Best is trial 51 with value: -6502.11083984375. [0m
[32m[I 2021-12-10 17:57:28	450] [0m Trial 55 finished with value: -4836.541015625 and parameters: {'r_scaling': 56.075536354792646	'unroll': 4	'update_epoch': 14	'discount': 0.9454357734774063	'lr': 0.00028882690913736815	'entropy': 0.001230557066951795}. Best is trial 51 with value: -6502.11083984375. [0m
[32m[I 2021-12-10 17:59:28	829] [0m Trial 56 finished with value: -5706.07666015625 and parameters: {'r_scaling': 5.8979448978781805	'unroll': 6	'update_epoch': 13	'discount': 0.9742131631541002	'lr': 0.0003642782866788877	'entropy': 0.005207121062985023}. Best is trial 51 with value: -6502.11083984375. [0m
[32m[I 2021-12-10 18:01:48	762] [0m Trial 57 finished with value: -5958.42724609375 and parameters: {'r_scaling': 111.28909327673789	'unroll': 5	'update_epoch': 15	'discount': 0.934199164521015	'lr': 0.00057764078553769	'entropy': 0.0029188656688126087}. Best is trial 51 with value: -6502.11083984375. [0m
[32m[I 2021-12-10 18:03:30	595] [0m Trial 58 finished with value: -2972.760986328125 and parameters: {'r_scaling': 15.890602836869913	'unroll': 8	'update_epoch': 10	'discount': 0.9638216313475375	'lr': 0.0008188941079290338	'entropy': 0.00150146611392846}. Best is trial 51 with value: -6502.11083984375. [0m
[32m[I 2021-12-10 18:05:31	178] [0m Trial 59 finished with value: -5761.779296875 and parameters: {'r_scaling': 24.96771662785664	'unroll': 6	'update_epoch': 12	'discount': 0.969632717425705	'lr': 0.0004286312722387475	'entropy': 0.00962352079391444}. Best is trial 51 with value: -6502.11083984375. [0m
[32m[I 2021-12-10 18:07:39	899] [0m Trial 60 finished with value: -4069.9365234375 and parameters: {'r_scaling': 1.3248652742362608	'unroll': 4	'update_epoch': 14	'discount': 0.9494543109311684	'lr': 0.00027458135643482987	'entropy': 0.0036330282657583437}. Best is trial 51 with value: -6502.11083984375. [0m
[32m[I 2021-12-10 18:09:58	192] [0m Trial 61 finished with value: -6400.66796875 and parameters: {'r_scaling': 2.55966577220658	'unroll': 5	'update_epoch': 14	'discount': 0.9226483055326257	'lr': 0.00023784492347578312	'entropy': 0.002304929332910017}. Best is trial 51 with value: -6502.11083984375. [0m
[32m[I 2021-12-10 18:12:11	692] [0m Trial 62 finished with value: -5957.45849609375 and parameters: {'r_scaling': 3.0673609550475676	'unroll': 5	'update_epoch': 13	'discount': 0.9112859609478128	'lr': 0.00023696018359325844	'entropy': 0.002137596996315718}. Best is trial 51 with value: -6502.11083984375. [0m
[32m[I 2021-12-10 18:14:49	176] [0m Trial 63 finished with value: -5691.47265625 and parameters: {'r_scaling': 2.445511502469452	'unroll': 3	'update_epoch': 15	'discount': 0.9833657526318701	'lr': 0.00015040744795662687	'entropy': 0.0011020935172702845}. Best is trial 51 with value: -6502.11083984375. [0m
[32m[I 2021-12-10 18:16:46	741] [0m Trial 64 finished with value: -4995.60302734375 and parameters: {'r_scaling': 8.526944920273921	'unroll': 4	'update_epoch': 14	'discount': 0.9037572549876796	'lr': 0.0004882963794134319	'entropy': 0.0016012355492150594}. Best is trial 51 with value: -6502.11083984375. [0m
[32m[I 2021-12-10 18:18:51	925] [0m Trial 65 finished with value: -5939.5732421875 and parameters: {'r_scaling': 3.822907890940269	'unroll': 7	'update_epoch': 12	'discount': 0.9355635914414705	'lr': 0.0006459771238882182	'entropy': 0.00636556655555073}. Best is trial 51 with value: -6502.11083984375. [0m
[32m[I 2021-12-10 18:21:24	346] [0m Trial 66 finished with value: -4370.3544921875 and parameters: {'r_scaling': 1.0691848305605451	'unroll': 2	'update_epoch': 15	'discount': 0.9582160355267956	'lr': 0.0001837387116488064	'entropy': 0.0007840927280407158}. Best is trial 51 with value: -6502.11083984375. [0m
[32m[I 2021-12-10 18:23:18	367] [0m Trial 67 finished with value: -6023.4072265625 and parameters: {'r_scaling': 0.7390517669998393	'unroll': 4	'update_epoch': 13	'discount': 0.9909327097620533	'lr': 0.0003109820377855615	'entropy': 0.004593398884375673}. Best is trial 51 with value: -6502.11083984375. [0m
[32m[I 2021-12-10 18:25:07	029] [0m Trial 68 finished with value: -2338.984619140625 and parameters: {'r_scaling': 0.5090877402966465	'unroll': 8	'update_epoch': 14	'discount': 0.919942941261328	'lr': 0.00023697276487284706	'entropy': 0.002442810265086553}. Best is trial 51 with value: -6502.11083984375. [0m
[32m[I 2021-12-10 18:27:05	098] [0m Trial 69 finished with value: -5289.2998046875 and parameters: {'r_scaling': 2.0334121616971936	'unroll': 6	'update_epoch': 11	'discount': 0.9163422930951525	'lr': 0.0003520755788903349	'entropy': 0.0005971609710960113}. Best is trial 51 with value: -6502.11083984375. [0m
[32m[I 2021-12-10 18:28:57	562] [0m Trial 70 finished with value: -3830.946044921875 and parameters: {'r_scaling': 37.1395080326137	'unroll': 5	'update_epoch': 7	'discount': 0.9730800832304553	'lr': 0.0002096278288701349	'entropy': 0.0027592279670055593}. Best is trial 51 with value: -6502.11083984375. [0m
[32m[I 2021-12-10 18:31:03	454] [0m Trial 71 finished with value: -5972.3642578125 and parameters: {'r_scaling': 0.13570749539850152	'unroll': 4	'update_epoch': 13	'discount': 0.9924793796250374	'lr': 0.0003174697996085483	'entropy': 0.013786887814423528}. Best is trial 51 with value: -6502.11083984375. [0m
[32m[I 2021-12-10 18:33:03	693] [0m Trial 72 finished with value: -5761.35107421875 and parameters: {'r_scaling': 4.834430773452515	'unroll': 5	'update_epoch': 12	'discount': 0.9882006634166318	'lr': 0.00029144518727814355	'entropy': 0.0032959179950546934}. Best is trial 51 with value: -6502.11083984375. [0m
[32m[I 2021-12-10 18:35:38	376] [0m Trial 73 finished with value: -5625.39697265625 and parameters: {'r_scaling': 9.492019474429021	'unroll': 3	'update_epoch': 14	'discount': 0.9856187992983046	'lr': 0.00027274132362320827	'entropy': 0.00411472448123545}. Best is trial 51 with value: -6502.11083984375. [0m
[32m[I 2021-12-10 18:37:32	782] [0m Trial 74 finished with value: -5708.115234375 and parameters: {'r_scaling': 0.8202719924096431	'unroll': 4	'update_epoch': 13	'discount': 0.9788651985543525	'lr': 0.00040250952706617695	'entropy': 0.0017474871910415019}. Best is trial 51 with value: -6502.11083984375. [0m
[32m[I 2021-12-10 18:39:02	783] [0m Trial 75 finished with value: -1009.3292846679688 and parameters: {'r_scaling': 7.088376081916577	'unroll': 5	'update_epoch': 1	'discount': 0.9902627322872247	'lr': 0.0003225219104398542	'entropy': 0.004702499056862591}. Best is trial 51 with value: -6502.11083984375. [0m
[32m[I 2021-12-10 18:41:06	806] [0m Trial 76 finished with value: -4830.20556640625 and parameters: {'r_scaling': 14.850594833665511	'unroll': 6	'update_epoch': 14	'discount': 0.9829158128875775	'lr': 0.00022417419734238083	'entropy': 0.0011071321988944363}. Best is trial 51 with value: -6502.11083984375. [0m
[32m[I 2021-12-10 18:42:37	363] [0m Trial 77 finished with value: -3685.322021484375 and parameters: {'r_scaling': 0.45738654686073493	'unroll': 4	'update_epoch': 2	'discount': 0.9639799115934838	'lr': 0.0005216109772503391	'entropy': 0.002206266563396371}. Best is trial 51 with value: -6502.11083984375. [0m
[32m[I 2021-12-10 18:44:15	326] [0m Trial 78 finished with value: -2279.132568359375 and parameters: {'r_scaling': 0.16950691789534958	'unroll': 12	'update_epoch': 6	'discount': 0.9709477220076678	'lr': 0.00019173291889775637	'entropy': 0.006133631727794122}. Best is trial 51 with value: -6502.11083984375. [0m
[32m[I 2021-12-10 18:46:28	307] [0m Trial 79 finished with value: -5468.12255859375 and parameters: {'r_scaling': 2.836559680308613	'unroll': 7	'update_epoch': 13	'discount': 0.9854091371501071	'lr': 0.0002547670466499552	'entropy': 0.0009110160300464808}. Best is trial 51 with value: -6502.11083984375. [0m
[32m[I 2021-12-10 18:49:01	612] [0m Trial 80 finished with value: -4787.34912109375 and parameters: {'r_scaling': 12.07003670389894	'unroll': 2	'update_epoch': 15	'discount': 0.9787506359426115	'lr': 0.0004327519103397901	'entropy': 0.0013069653601250647}. Best is trial 51 with value: -6502.11083984375. [0m
[32m[I 2021-12-10 18:51:18	830] [0m Trial 81 finished with value: -6354.857421875 and parameters: {'r_scaling': 6.940033284016007	'unroll': 5	'update_epoch': 14	'discount': 0.9258038407979002	'lr': 0.00025548506547670523	'entropy': 0.0019485823837689464}. Best is trial 51 with value: -6502.11083984375. [0m
[32m[I 2021-12-10 18:53:35	737] [0m Trial 82 finished with value: -6636.6416015625 and parameters: {'r_scaling': 5.5824208616951445	'unroll': 5	'update_epoch': 14	'discount': 0.9231778937210855	'lr': 0.0002904533563367608	'entropy': 0.0019959489617217135}. Best is trial 82 with value: -6636.6416015625. [0m
[32m[I 2021-12-10 18:55:53	779] [0m Trial 83 finished with value: -6247.28271484375 and parameters: {'r_scaling': 5.394833895123587	'unroll': 5	'update_epoch': 14	'discount': 0.9253261074314754	'lr': 0.0002485795280461369	'entropy': 0.001623119917057108}. Best is trial 82 with value: -6636.6416015625. [0m
[32m[I 2021-12-10 18:58:03	009] [0m Trial 84 finished with value: -4149.1484375 and parameters: {'r_scaling': 3.9521398194067054	'unroll': 6	'update_epoch': 14	'discount': 0.924367264638474	'lr': 0.00015810370738582127	'entropy': 0.0017844483967280375}. Best is trial 82 with value: -6636.6416015625. [0m
[32m[I 2021-12-10 19:00:23	166] [0m Trial 85 finished with value: -6489.0498046875 and parameters: {'r_scaling': 5.972247226841183	'unroll': 5	'update_epoch': 15	'discount': 0.9294299984162779	'lr': 0.0002486743790408087	'entropy': 0.0020566440304393913}. Best is trial 82 with value: -6636.6416015625. [0m
[32m[I 2021-12-10 19:02:43	487] [0m Trial 86 finished with value: -6372.65087890625 and parameters: {'r_scaling': 6.094115804477324	'unroll': 5	'update_epoch': 15	'discount': 0.9292979106602032	'lr': 0.0002490148918130244	'entropy': 0.0025659568404662048}. Best is trial 82 with value: -6636.6416015625. [0m
[32m[I 2021-12-10 19:04:51	557] [0m Trial 87 finished with value: -4705.29052734375 and parameters: {'r_scaling': 5.915333690653735	'unroll': 6	'update_epoch': 15	'discount': 0.9293814547517557	'lr': 0.0002493320464236034	'entropy': 0.002171116010857821}. Best is trial 82 with value: -6636.6416015625. [0m
[32m[I 2021-12-10 19:07:11	366] [0m Trial 88 finished with value: -6166.3955078125 and parameters: {'r_scaling': 7.815665290622972	'unroll': 5	'update_epoch': 15	'discount': 0.9162894192103326	'lr': 0.00021405067381659966	'entropy': 0.0027634372117501774}. Best is trial 82 with value: -6636.6416015625. [0m
[32m[I 2021-12-10 19:09:18	473] [0m Trial 89 finished with value: -3803.904541015625 and parameters: {'r_scaling': 2.0892554649933914	'unroll': 6	'update_epoch': 15	'discount': 0.9225823441296764	'lr': 0.00013690374902708156	'entropy': 0.0025211564906184366}. Best is trial 82 with value: -6636.6416015625. [0m
[32m[I 2021-12-10 19:11:29	293] [0m Trial 90 finished with value: -4660.2919921875 and parameters: {'r_scaling': 3.3037121009520933	'unroll': 7	'update_epoch': 14	'discount': 0.926705793943914	'lr': 0.00017668504101095363	'entropy': 0.0031390725515988687}. Best is trial 82 with value: -6636.6416015625. [0m
[32m[I 2021-12-10 19:13:53	580] [0m Trial 91 finished with value: -6215.52099609375 and parameters: {'r_scaling': 6.570478295652771	'unroll': 5	'update_epoch': 15	'discount': 0.9333032226000325	'lr': 0.00022466754673993204	'entropy': 0.00204329191407423}. Best is trial 82 with value: -6636.6416015625. [0m
[32m[I 2021-12-10 19:16:10	425] [0m Trial 92 finished with value: -6516.1630859375 and parameters: {'r_scaling': 4.2994539569804635	'unroll': 5	'update_epoch': 14	'discount': 0.9312144174997453	'lr': 0.0002463146180959157	'entropy': 0.0013620653771820306}. Best is trial 82 with value: -6636.6416015625. [0m
[32m[I 2021-12-10 19:18:17	842] [0m Trial 93 finished with value: -6078.85888671875 and parameters: {'r_scaling': 5.137575385291878	'unroll': 4	'update_epoch': 14	'discount': 0.9291010239381426	'lr': 0.00024834420550305723	'entropy': 0.0014704334765266705}. Best is trial 82 with value: -6636.6416015625. [0m
[32m[I 2021-12-10 19:20:36	746] [0m Trial 94 finished with value: -6491.4208984375 and parameters: {'r_scaling': 9.334650824737839	'unroll': 5	'update_epoch': 15	'discount': 0.9375511358596913	'lr': 0.0002650045020976256	'entropy': 0.0012141315473763528}. Best is trial 82 with value: -6636.6416015625. [0m
[32m[I 2021-12-10 19:22:57	953] [0m Trial 95 finished with value: -6196.7998046875 and parameters: {'r_scaling': 4.438446715205512	'unroll': 5	'update_epoch': 15	'discount': 0.9427685917722736	'lr': 0.0002977037361786533	'entropy': 0.0010355234594389554}. Best is trial 82 with value: -6636.6416015625. [0m
[32m[I 2021-12-10 19:25:05	504] [0m Trial 96 finished with value: -5525.73583984375 and parameters: {'r_scaling': 10.169865080357493	'unroll': 6	'update_epoch': 15	'discount': 0.9370447889770799	'lr': 0.0002707533824583049	'entropy': 0.0012359600093331813}. Best is trial 82 with value: -6636.6416015625. [0m
[32m[I 2021-12-10 19:27:16	739] [0m Trial 97 finished with value: -5979.95458984375 and parameters: {'r_scaling': 3.9311754407413426	'unroll': 4	'update_epoch': 15	'discount': 0.9323872217622363	'lr': 0.00019345472686429255	'entropy': 0.0035233656512796397}. Best is trial 82 with value: -6636.6416015625. [0m
[32m[I 2021-12-10 19:29:52	614] [0m Trial 98 finished with value: -5079.17822265625 and parameters: {'r_scaling': 8.346550992773928	'unroll': 3	'update_epoch': 14	'discount': 0.9304388054478819	'lr': 0.00022292341954844092	'entropy': 0.0023480257733920463}. Best is trial 82 with value: -6636.6416015625. [0m
[32m[I 2021-12-10 19:32:12	456] [0m Trial 99 finished with value: 105.42195129394531 and parameters: {'r_scaling': 2.7144975076405724	'unroll': 5	'update_epoch': 15	'discount': 0.921117051525883	'lr': 0.001986266169703703	'entropy': 0.0006736868271311577}. Best is trial 82 with value: -6636.6416015625. [0m
