# Supplementary material
Source: ML conference proceedings conference paper supplement (https://proceedings.neurips.cc/paper_files/paper/2022/hash/10a6bdcabbd5a3d36b760daa295f63c1-Abstract.html)
Supplement: Supplementary file 1 [file 10a6bdcabbd5a3d36b760daa295f63c1-Supplemental-Conference.zip › neurips2022/code/robotics_code/hp_searches/ant_20M.log]

[32m[I 2022-01-22 20:29:17	822] [0m A new study created in memory with name: no-name-173f628e-3832-4c98-a1e8-a4ed79253a72 [0m
[32m[I 2022-01-22 20:32:42	966] [0m Trial 0 finished with value: -6935.39453125 and parameters: {'r_scaling': 56.13728481387535	'unroll': 6	'update_epoch': 12	'discount': 0.9685042059557307	'lr': 0.0003038477962241602	'entropy': 0.0002796485272453778}. Best is trial 0 with value: -6935.39453125. [0m
[32m[I 2022-01-22 20:34:59	613] [0m Trial 1 finished with value: -3736.706298828125 and parameters: {'r_scaling': 16.454004460487578	'unroll': 11	'update_epoch': 4	'discount': 0.9157059615825609	'lr': 0.0004027804332543511	'entropy': 0.02574740638127511}. Best is trial 0 with value: -6935.39453125. [0m
[32m[I 2022-01-22 20:37:18	844] [0m Trial 2 finished with value: -3478.949951171875 and parameters: {'r_scaling': 0.1573225311634637	'unroll': 13	'update_epoch': 3	'discount': 0.9080738861660055	'lr': 0.00031341481746371513	'entropy': 0.00013399606328263594}. Best is trial 0 with value: -6935.39453125. [0m
[32m[I 2022-01-22 20:40:40	380] [0m Trial 3 finished with value: -2591.403564453125 and parameters: {'r_scaling': 1.1187860234749052	'unroll': 2	'update_epoch': 7	'discount': 0.970722464470833	'lr': 0.0010547993554972403	'entropy': 0.0023695387277532184}. Best is trial 0 with value: -6935.39453125. [0m
[32m[I 2022-01-22 20:43:17	609] [0m Trial 4 finished with value: -5814.11083984375 and parameters: {'r_scaling': 0.6015703746077387	'unroll': 15	'update_epoch': 4	'discount': 0.9859311333715178	'lr': 0.0006847673225233718	'entropy': 0.0031088130157605745}. Best is trial 0 with value: -6935.39453125. [0m
[32m[I 2022-01-22 20:46:22	992] [0m Trial 5 finished with value: -5480.9501953125 and parameters: {'r_scaling': 0.08099283570971086	'unroll': 9	'update_epoch': 10	'discount': 0.9530908081437295	'lr': 0.0011796374063679984	'entropy': 0.0050332083106608945}. Best is trial 0 with value: -6935.39453125. [0m
[32m[I 2022-01-22 20:49:45	912] [0m Trial 6 finished with value: 104.12809753417969 and parameters: {'r_scaling': 1.052433566114443	'unroll': 6	'update_epoch': 10	'discount': 0.971683638857072	'lr': 0.001564777136283032	'entropy': 0.012428158379176013}. Best is trial 0 with value: -6935.39453125. [0m
[32m[I 2022-01-22 20:52:38	123] [0m Trial 7 finished with value: -6462.66015625 and parameters: {'r_scaling': 43.03073078970838	'unroll': 9	'update_epoch': 7	'discount': 0.989261098520648	'lr': 0.0004083770397942461	'entropy': 0.025212628608413272}. Best is trial 0 with value: -6935.39453125. [0m
[32m[I 2022-01-22 20:55:53	758] [0m Trial 8 finished with value: -5861.52783203125 and parameters: {'r_scaling': 0.08299409552167757	'unroll': 5	'update_epoch': 9	'discount': 0.9405118620579059	'lr': 0.0002590545480963849	'entropy': 0.010679969120776785}. Best is trial 0 with value: -6935.39453125. [0m
[32m[I 2022-01-22 20:58:57	503] [0m Trial 9 finished with value: -6408.54443359375 and parameters: {'r_scaling': 1.0130982446814822	'unroll': 11	'update_epoch': 12	'discount': 0.9180377564576808	'lr': 0.0003599188116938216	'entropy': 0.0008135014790690717}. Best is trial 0 with value: -6935.39453125. [0m
[32m[I 2022-01-22 21:04:26	458] [0m Trial 10 finished with value: -2627.51513671875 and parameters: {'r_scaling': 144.28883426820516	'unroll': 1	'update_epoch': 15	'discount': 0.941905951148681	'lr': 0.00011020071752172992	'entropy': 0.00010240877307294253}. Best is trial 0 with value: -6935.39453125. [0m
[32m[I 2022-01-22 21:08:03	849] [0m Trial 11 finished with value: -6293.5009765625 and parameters: {'r_scaling': 35.32201809344169	'unroll': 7	'update_epoch': 14	'discount': 0.9929429522109987	'lr': 0.00013339879470292533	'entropy': 0.061501284756345316}. Best is trial 0 with value: -6935.39453125. [0m
[32m[I 2022-01-22 21:11:08	691] [0m Trial 12 finished with value: -6178.720703125 and parameters: {'r_scaling': 9.413553969027241	'unroll': 4	'update_epoch': 7	'discount': 0.9734550156453736	'lr': 0.00019344449984873489	'entropy': 0.000794617658406387}. Best is trial 0 with value: -6935.39453125. [0m
[32m[I 2022-01-22 21:14:24	378] [0m Trial 13 finished with value: -6036.8818359375 and parameters: {'r_scaling': 169.94513985919662	'unroll': 8	'update_epoch': 12	'discount': 0.9568498125866057	'lr': 0.0005896092987827032	'entropy': 0.00040035569211363585}. Best is trial 0 with value: -6935.39453125. [0m
[32m[I 2022-01-22 21:17:27	924] [0m Trial 14 finished with value: -6768.76708984375 and parameters: {'r_scaling': 45.71381060694422	'unroll': 10	'update_epoch': 7	'discount': 0.9869862837594158	'lr': 0.0006041934603037398	'entropy': 0.08234495406872185}. Best is trial 0 with value: -6935.39453125. [0m
[32m[I 2022-01-22 21:19:48	681] [0m Trial 15 finished with value: -2638.72998046875 and parameters: {'r_scaling': 7.344675742214281	'unroll': 11	'update_epoch': 1	'discount': 0.9621695456516399	'lr': 0.0007079665588408408	'entropy': 0.0003115780389221433}. Best is trial 0 with value: -6935.39453125. [0m
[32m[I 2022-01-22 21:23:23	821] [0m Trial 16 finished with value: -6278.353515625 and parameters: {'r_scaling': 49.030166789851755	'unroll': 4	'update_epoch': 12	'discount': 0.9786665211316806	'lr': 0.0001871783164557245	'entropy': 0.001654112081061113}. Best is trial 0 with value: -6935.39453125. [0m
[32m[I 2022-01-22 21:26:10	495] [0m Trial 17 finished with value: -5936.99560546875 and parameters: {'r_scaling': 4.083663731842783	'unroll': 13	'update_epoch': 6	'discount': 0.9312267292828633	'lr': 0.000541050482616084	'entropy': 0.08338873655216661}. Best is trial 0 with value: -6935.39453125. [0m
[32m[I 2022-01-22 21:29:13	709] [0m Trial 18 finished with value: -6557.8046875 and parameters: {'r_scaling': 88.24542388363504	'unroll': 9	'update_epoch': 9	'discount': 0.9632376996119525	'lr': 0.0002369162514411076	'entropy': 0.006051041850569418}. Best is trial 0 with value: -6935.39453125. [0m
[32m[I 2022-01-22 21:32:43	851] [0m Trial 19 finished with value: -5257.6533203125 and parameters: {'r_scaling': 20.10470693548722	'unroll': 7	'update_epoch': 13	'discount': 0.9809545594908516	'lr': 0.0008997152474493794	'entropy': 0.0002603228377988747}. Best is trial 0 with value: -6935.39453125. [0m
[32m[I 2022-01-22 21:35:44	940] [0m Trial 20 finished with value: -4685.7939453125 and parameters: {'r_scaling': 3.3840080785515143	'unroll': 3	'update_epoch': 5	'discount': 0.9664695344954535	'lr': 0.0005203799092759101	'entropy': 0.0010875628400356203}. Best is trial 0 with value: -6935.39453125. [0m
[32m[I 2022-01-22 21:38:48	823] [0m Trial 21 finished with value: -6600.02880859375 and parameters: {'r_scaling': 83.17160913045099	'unroll': 9	'update_epoch': 9	'discount': 0.953399463765498	'lr': 0.00024483873969610346	'entropy': 0.00663772269170894}. Best is trial 0 with value: -6935.39453125. [0m
[32m[I 2022-01-22 21:42:09	111] [0m Trial 22 finished with value: -6196.32666015625 and parameters: {'r_scaling': 84.24449416366181	'unroll': 10	'update_epoch': 10	'discount': 0.9496052155491433	'lr': 0.00016546202093557913	'entropy': 0.027179043419357667}. Best is trial 0 with value: -6935.39453125. [0m
[32m[I 2022-01-22 21:44:54	673] [0m Trial 23 finished with value: -6574.17138671875 and parameters: {'r_scaling': 22.431779102860027	'unroll': 7	'update_epoch': 8	'discount': 0.9306635265884776	'lr': 0.0002809600016453509	'entropy': 0.04555492045075516}. Best is trial 0 with value: -6935.39453125. [0m
[32m[I 2022-01-22 21:47:58	731] [0m Trial 24 finished with value: 111.545166015625 and parameters: {'r_scaling': 65.1990391742531	'unroll': 12	'update_epoch': 11	'discount': 0.9810820159060551	'lr': 0.0019400801060426923	'entropy': 0.01121769502504279}. Best is trial 0 with value: -6935.39453125. [0m
[32m[I 2022-01-22 21:51:09	106] [0m Trial 25 finished with value: -6309.19921875 and parameters: {'r_scaling': 169.93116164986031	'unroll': 6	'update_epoch': 8	'discount': 0.9588893734515134	'lr': 0.0002067792547892439	'entropy': 0.0005554082304969464}. Best is trial 0 with value: -6935.39453125. [0m
[32m[I 2022-01-22 21:54:05	889] [0m Trial 26 finished with value: -6804.041015625 and parameters: {'r_scaling': 10.202970318508559	'unroll': 8	'update_epoch': 9	'discount': 0.9455427284314916	'lr': 0.000345059537207531	'entropy': 0.006310131770718191}. Best is trial 0 with value: -6935.39453125. [0m
[32m[I 2022-01-22 21:57:56	572] [0m Trial 27 finished with value: -996.8460693359375 and parameters: {'r_scaling': 9.960470528405887	'unroll': 5	'update_epoch': 14	'discount': 0.9949229524401796	'lr': 0.00045817392716225076	'entropy': 0.001629113689141354}. Best is trial 0 with value: -6935.39453125. [0m
[32m[I 2022-01-22 22:01:03	093] [0m Trial 28 finished with value: -6973.27978515625 and parameters: {'r_scaling': 6.386141144878039	'unroll': 8	'update_epoch': 11	'discount': 0.9360414980134284	'lr': 0.00032702210999867884	'entropy': 0.00018761756394723595}. Best is trial 28 with value: -6973.27978515625. [0m
[32m[I 2022-01-22 22:03:52	142] [0m Trial 29 finished with value: -6686.953125 and parameters: {'r_scaling': 6.906332320659815	'unroll': 8	'update_epoch': 11	'discount': 0.9341447084409606	'lr': 0.0003472463968787846	'entropy': 0.00018635301550099724}. Best is trial 28 with value: -6973.27978515625. [0m
[32m[I 2022-01-22 22:07:34	971] [0m Trial 30 finished with value: -4726.9072265625 and parameters: {'r_scaling': 2.11736480818606	'unroll': 6	'update_epoch': 13	'discount': 0.9271588957648006	'lr': 0.00046466165288633755	'entropy': 0.0001956371203848568}. Best is trial 28 with value: -6973.27978515625. [0m
[32m[I 2022-01-22 22:11:00	346] [0m Trial 31 finished with value: -6899.9677734375 and parameters: {'r_scaling': 15.88734060608227	'unroll': 10	'update_epoch': 11	'discount': 0.9437080661563358	'lr': 0.0003913835948648483	'entropy': 0.00043161365832578014}. Best is trial 28 with value: -6973.27978515625. [0m
[32m[I 2022-01-22 22:14:24	212] [0m Trial 32 finished with value: -6832.9326171875 and parameters: {'r_scaling': 17.744590416498937	'unroll': 10	'update_epoch': 11	'discount': 0.9427210167563137	'lr': 0.0003474980852064184	'entropy': 0.00046721749692392895}. Best is trial 28 with value: -6973.27978515625. [0m
[32m[I 2022-01-22 22:17:51	450] [0m Trial 33 finished with value: -6617.6005859375 and parameters: {'r_scaling': 23.62443787621496	'unroll': 10	'update_epoch': 11	'discount': 0.9220139319400507	'lr': 0.0002928825506610758	'entropy': 0.00042106749012790296}. Best is trial 28 with value: -6973.27978515625. [0m
[32m[I 2022-01-22 22:21:05	527] [0m Trial 34 finished with value: -6529.72705078125 and parameters: {'r_scaling': 5.177248840707588	'unroll': 15	'update_epoch': 13	'discount': 0.9024169876790595	'lr': 0.0003661979221672414	'entropy': 0.00012179123263054822}. Best is trial 28 with value: -6973.27978515625. [0m
[32m[I 2022-01-22 22:24:32	126] [0m Trial 35 finished with value: -6472.2607421875 and parameters: {'r_scaling': 2.116945822977161	'unroll': 12	'update_epoch': 15	'discount': 0.9391087725144358	'lr': 0.00042068423711968456	'entropy': 0.0001800033497634288}. Best is trial 28 with value: -6973.27978515625. [0m
[32m[I 2022-01-22 22:27:45	674] [0m Trial 36 finished with value: -6259.97705078125 and parameters: {'r_scaling': 14.587792345335655	'unroll': 13	'update_epoch': 11	'discount': 0.9455855765384433	'lr': 0.00031631355473563653	'entropy': 0.0006823247846113299}. Best is trial 28 with value: -6973.27978515625. [0m
[32m[I 2022-01-22 22:31:17	349] [0m Trial 37 finished with value: -6597.21240234375 and parameters: {'r_scaling': 14.362204670102921	'unroll': 10	'update_epoch': 12	'discount': 0.9351966535461672	'lr': 0.00015623171077003837	'entropy': 0.00030678739089022236}. Best is trial 28 with value: -6973.27978515625. [0m
[32m[I 2022-01-22 22:34:15	693] [0m Trial 38 finished with value: -6139.103515625 and parameters: {'r_scaling': 31.290387878797482	'unroll': 7	'update_epoch': 10	'discount': 0.9265240229890787	'lr': 0.0007231069941644481	'entropy': 0.0004876618124831938}. Best is trial 28 with value: -6973.27978515625. [0m
[32m[I 2022-01-22 22:37:35	328] [0m Trial 39 finished with value: -6017.3544921875 and parameters: {'r_scaling': 2.1068535837461106	'unroll': 12	'update_epoch': 14	'discount': 0.9137500068139124	'lr': 0.00024078054979126404	'entropy': 0.00014971785779307797}. Best is trial 28 with value: -6973.27978515625. [0m
[32m[I 2022-01-22 22:40:47	130] [0m Trial 40 finished with value: -6118.359375 and parameters: {'r_scaling': 5.446886873163663	'unroll': 14	'update_epoch': 10	'discount': 0.9478995547036202	'lr': 0.0008878299970080382	'entropy': 0.00024575815201264694}. Best is trial 28 with value: -6973.27978515625. [0m
[32m[I 2022-01-22 22:43:46	582] [0m Trial 41 finished with value: -6651.0693359375 and parameters: {'r_scaling': 0.29602521973719415	'unroll': 8	'update_epoch': 9	'discount': 0.9453523815329314	'lr': 0.000326920837070352	'entropy': 0.0031745052851343786}. Best is trial 28 with value: -6973.27978515625. [0m
[32m[I 2022-01-22 22:46:51	252] [0m Trial 42 finished with value: -6718.0322265625 and parameters: {'r_scaling': 12.485828109462958	'unroll': 8	'update_epoch': 11	'discount': 0.9377093237308108	'lr': 0.00037780301856029313	'entropy': 0.0013630294371136974}. Best is trial 28 with value: -6973.27978515625. [0m
[32m[I 2022-01-22 22:49:58	205] [0m Trial 43 finished with value: -6886.0556640625 and parameters: {'r_scaling': 21.06919352667605	'unroll': 9	'update_epoch': 10	'discount': 0.9522845695652069	'lr': 0.00029538897418386134	'entropy': 0.0025606828923963325}. Best is trial 28 with value: -6973.27978515625. [0m
[32m[I 2022-01-22 22:53:18	620] [0m Trial 44 finished with value: -6914.9482421875 and parameters: {'r_scaling': 28.58029740250529	'unroll': 9	'update_epoch': 12	'discount': 0.9524955561859243	'lr': 0.0002798633163702923	'entropy': 0.0026592866389576137}. Best is trial 28 with value: -6973.27978515625. [0m
[32m[I 2022-01-22 22:56:35	889] [0m Trial 45 finished with value: -6782.46044921875 and parameters: {'r_scaling': 54.91738151631548	'unroll': 9	'update_epoch': 12	'discount': 0.9522555528497683	'lr': 0.00028670881140204277	'entropy': 0.002660842324275785}. Best is trial 28 with value: -6973.27978515625. [0m
[32m[I 2022-01-22 22:59:41	443] [0m Trial 46 finished with value: -6074.3642578125 and parameters: {'r_scaling': 29.99377833461138	'unroll': 11	'update_epoch': 13	'discount': 0.9682679639765828	'lr': 0.00021088513706762874	'entropy': 0.004399301075471594}. Best is trial 28 with value: -6973.27978515625. [0m
[32m[I 2022-01-22 23:03:19	804] [0m Trial 47 finished with value: -6407.97265625 and parameters: {'r_scaling': 122.77382995812012	'unroll': 5	'update_epoch': 12	'discount': 0.9582942954748387	'lr': 0.00041522223396754475	'entropy': 0.00010006231473576687}. Best is trial 28 with value: -6973.27978515625. [0m
[32m[I 2022-01-22 23:06:31	057] [0m Trial 48 finished with value: -6805.36474609375 and parameters: {'r_scaling': 36.57194879793003	'unroll': 9	'update_epoch': 10	'discount': 0.9547021928190521	'lr': 0.00026659739228410704	'entropy': 0.0009555926099622472}. Best is trial 28 with value: -6973.27978515625. [0m
[32m[I 2022-01-22 23:10:12	159] [0m Trial 49 finished with value: -6379.9375 and parameters: {'r_scaling': 23.251892895573363	'unroll': 6	'update_epoch': 13	'discount': 0.9753969990003039	'lr': 0.00011494486862967835	'entropy': 0.003810429283187805}. Best is trial 28 with value: -6973.27978515625. [0m
[32m[I 2022-01-22 23:13:45	799] [0m Trial 50 finished with value: -6794.54296875 and parameters: {'r_scaling': 8.225280232610787	'unroll': 7	'update_epoch': 14	'discount': 0.9642367364485089	'lr': 0.0004965895907071535	'entropy': 0.00200156131801643}. Best is trial 28 with value: -6973.27978515625. [0m
[32m[I 2022-01-22 23:17:07	077] [0m Trial 51 finished with value: -6892.576171875 and parameters: {'r_scaling': 16.400597185507532	'unroll': 10	'update_epoch': 11	'discount': 0.9435053188072495	'lr': 0.0003113091966736698	'entropy': 0.00029820375846024527}. Best is trial 28 with value: -6973.27978515625. [0m
[32m[I 2022-01-22 23:20:08	301] [0m Trial 52 finished with value: -5798.5546875 and parameters: {'r_scaling': 30.100476437593567	'unroll': 11	'update_epoch': 11	'discount': 0.9507491256131964	'lr': 0.00021364357311348502	'entropy': 0.0003512571043002879}. Best is trial 28 with value: -6973.27978515625. [0m
[32m[I 2022-01-22 23:23:25	046] [0m Trial 53 finished with value: -7015.5341796875 and parameters: {'r_scaling': 12.944576862113896	'unroll': 9	'update_epoch': 12	'discount': 0.9606109383187332	'lr': 0.0003003128979312755	'entropy': 0.0006064748304300787}. Best is trial 53 with value: -7015.5341796875. [0m
[32m[I 2022-01-22 23:26:53	514] [0m Trial 54 finished with value: -6934.89501953125 and parameters: {'r_scaling': 11.999070899554077	'unroll': 10	'update_epoch': 12	'discount': 0.9606929718068774	'lr': 0.00040044374025804003	'entropy': 0.0005922697517417596}. Best is trial 53 with value: -7015.5341796875. [0m
[32m[I 2022-01-22 23:30:27	238] [0m Trial 55 finished with value: -6936.306640625 and parameters: {'r_scaling': 5.723486889810576	'unroll': 9	'update_epoch': 15	'discount': 0.9712841468233211	'lr': 0.0003936466186590648	'entropy': 0.0006475686040188461}. Best is trial 53 with value: -7015.5341796875. [0m
[32m[I 2022-01-22 23:32:54	052] [0m Trial 56 finished with value: -5602.30078125 and parameters: {'r_scaling': 2.9540563969026152	'unroll': 8	'update_epoch': 2	'discount': 0.9704706044577873	'lr': 0.0005993660077804118	'entropy': 0.0006234173286208847}. Best is trial 53 with value: -7015.5341796875. [0m
[32m[I 2022-01-22 23:36:12	625] [0m Trial 57 finished with value: -6782.3359375 and parameters: {'r_scaling': 6.141465661769848	'unroll': 9	'update_epoch': 12	'discount': 0.9593002300071789	'lr': 0.00017452768614226137	'entropy': 0.0010316720353434187}. Best is trial 53 with value: -7015.5341796875. [0m
[32m[I 2022-01-22 23:40:06	000] [0m Trial 58 finished with value: -6107.05615234375 and parameters: {'r_scaling': 1.338140067461466	'unroll': 4	'update_epoch': 15	'discount': 0.9764472564002921	'lr': 0.00023729076274039285	'entropy': 0.00023737290886370106}. Best is trial 53 with value: -7015.5341796875. [0m
[32m[I 2022-01-22 23:43:20	990] [0m Trial 59 finished with value: -6145.46044921875 and parameters: {'r_scaling': 11.695256952012633	'unroll': 11	'update_epoch': 15	'discount': 0.9660262351231527	'lr': 0.0002652673920209059	'entropy': 0.0008421208863346195}. Best is trial 53 with value: -7015.5341796875. [0m
[32m[I 2022-01-22 23:46:58	240] [0m Trial 60 finished with value: -6804.8544921875 and parameters: {'r_scaling': 4.811523164562398	'unroll': 7	'update_epoch': 14	'discount': 0.9696929281725513	'lr': 0.0004495421834664669	'entropy': 0.001312330372892568}. Best is trial 53 with value: -7015.5341796875. [0m
[32m[I 2022-01-22 23:50:25	045] [0m Trial 61 finished with value: -6937.1396484375 and parameters: {'r_scaling': 7.81075573240967	'unroll': 10	'update_epoch': 12	'discount': 0.9605580097883104	'lr': 0.00037566494787322967	'entropy': 0.0006467445852797604}. Best is trial 53 with value: -7015.5341796875. [0m
[32m[I 2022-01-22 23:53:47	868] [0m Trial 62 finished with value: -6974.560546875 and parameters: {'r_scaling': 3.557043755858553	'unroll': 9	'update_epoch': 13	'discount': 0.955564978951027	'lr': 0.0004052440924072342	'entropy': 0.0006634262191320412}. Best is trial 53 with value: -7015.5341796875. [0m
[32m[I 2022-01-22 23:56:57	271] [0m Trial 63 finished with value: -6433.8720703125 and parameters: {'r_scaling': 3.3151585209861163	'unroll': 11	'update_epoch': 13	'discount': 0.9613354265488377	'lr': 0.0005284457787198801	'entropy': 0.0005985147361418056}. Best is trial 53 with value: -7015.5341796875. [0m
[32m[I 2022-01-23 00:00:15	984] [0m Trial 64 finished with value: -6739.638671875 and parameters: {'r_scaling': 1.5109927727828223	'unroll': 8	'update_epoch': 13	'discount': 0.9723814057335385	'lr': 0.0004017716943196276	'entropy': 0.0007717530541696362}. Best is trial 53 with value: -7015.5341796875. [0m
[32m[I 2022-01-23 00:03:55	239] [0m Trial 65 finished with value: -6493.416015625 and parameters: {'r_scaling': 0.5937892572421205	'unroll': 10	'update_epoch': 14	'discount': 0.9631843108914429	'lr': 0.0004981533861145342	'entropy': 0.00014804288479448207}. Best is trial 53 with value: -7015.5341796875. [0m
[32m[I 2022-01-23 00:08:34	535] [0m Trial 66 finished with value: -4646.4375 and parameters: {'r_scaling': 4.247234264997503	'unroll': 1	'update_epoch': 13	'discount': 0.9560500086404369	'lr': 0.0003233650964219105	'entropy': 0.000211547509807751}. Best is trial 53 with value: -7015.5341796875. [0m
[32m[I 2022-01-23 00:12:34	748] [0m Trial 67 finished with value: -6112.97412109375 and parameters: {'r_scaling': 8.935400428365943	'unroll': 3	'update_epoch': 12	'discount': 0.9674084033316197	'lr': 0.00036639488286122746	'entropy': 0.0005195425569314125}. Best is trial 53 with value: -7015.5341796875. [0m
[32m[I 2022-01-23 00:16:21	289] [0m Trial 68 finished with value: -6008.7880859375 and parameters: {'r_scaling': 2.592655414251645	'unroll': 6	'update_epoch': 14	'discount': 0.9835675463846625	'lr': 0.0005732201498530067	'entropy': 0.0003606223977786149}. Best is trial 53 with value: -7015.5341796875. [0m
[32m[I 2022-01-23 00:20:02	558] [0m Trial 69 finished with value: -5896.169921875 and parameters: {'r_scaling': 7.077781152282175	'unroll': 9	'update_epoch': 15	'discount': 0.9612791768840162	'lr': 0.0004264004238627087	'entropy': 0.0012797565147319257}. Best is trial 53 with value: -7015.5341796875. [0m
[32m[I 2022-01-23 00:23:08	487] [0m Trial 70 finished with value: -6171.234375 and parameters: {'r_scaling': 3.88109875846588	'unroll': 12	'update_epoch': 12	'discount': 0.9739508142095481	'lr': 0.0006503155674574304	'entropy': 0.0007997328368261315}. Best is trial 53 with value: -7015.5341796875. [0m
[32m[I 2022-01-23 00:26:26	367] [0m Trial 71 finished with value: -6876.9365234375 and parameters: {'r_scaling': 11.925180953459291	'unroll': 9	'update_epoch': 12	'discount': 0.9574205271022953	'lr': 0.0002614393455175808	'entropy': 0.0017272761814631106}. Best is trial 53 with value: -7015.5341796875. [0m
[32m[I 2022-01-23 00:29:49	010] [0m Trial 72 finished with value: -7079.080078125 and parameters: {'r_scaling': 7.778767189924829	'unroll': 9	'update_epoch': 13	'discount': 0.94797329681809	'lr': 0.00035492957735186383	'entropy': 0.016155351984098457}. Best is trial 72 with value: -7079.080078125. [0m
[32m[I 2022-01-23 00:33:05	633] [0m Trial 73 finished with value: -6831.251953125 and parameters: {'r_scaling': 5.9788184140079	'unroll': 8	'update_epoch': 13	'discount': 0.9654132435845577	'lr': 0.00038573602462918733	'entropy': 0.01685752768916048}. Best is trial 72 with value: -7079.080078125. [0m
[32m[I 2022-01-23 00:36:28	552] [0m Trial 74 finished with value: -6752.5537109375 and parameters: {'r_scaling': 7.849624987182837	'unroll': 10	'update_epoch': 14	'discount': 0.9478423450109373	'lr': 0.00046753175111644295	'entropy': 0.02408546926326246}. Best is trial 72 with value: -7079.080078125. [0m
[32m[I 2022-01-23 00:39:42	518] [0m Trial 75 finished with value: -6366.60791015625 and parameters: {'r_scaling': 9.923586629377269	'unroll': 11	'update_epoch': 13	'discount': 0.9599893011465855	'lr': 0.0003440791231558031	'entropy': 0.0003858541157377509}. Best is trial 72 with value: -7079.080078125. [0m
[32m[I 2022-01-23 00:43:29	403] [0m Trial 76 finished with value: -6758.8330078125 and parameters: {'r_scaling': 4.368206762585034	'unroll': 10	'update_epoch': 15	'discount': 0.9485382883077004	'lr': 0.0003088917361082612	'entropy': 0.0006836638088676427}. Best is trial 72 with value: -7079.080078125. [0m
[32m[I 2022-01-23 00:46:39	285] [0m Trial 77 finished with value: -6463.33642578125 and parameters: {'r_scaling': 2.501455304305225	'unroll': 8	'update_epoch': 12	'discount': 0.9781038790704405	'lr': 0.0003407606087771929	'entropy': 0.0002763947587460187}. Best is trial 72 with value: -7079.080078125. [0m
[32m[I 2022-01-23 00:49:28	186] [0m Trial 78 finished with value: -6270.59375 and parameters: {'r_scaling': 0.8870989959154163	'unroll': 9	'update_epoch': 6	'discount': 0.9411941383431163	'lr': 0.000438293312319152	'entropy': 0.0001293250722979556}. Best is trial 72 with value: -7079.080078125. [0m
[32m[I 2022-01-23 00:52:49	765] [0m Trial 79 finished with value: -5870.0732421875 and parameters: {'r_scaling': 1.7170600316677749	'unroll': 7	'update_epoch': 11	'discount': 0.9564736409406772	'lr': 0.0003723269285964967	'entropy': 0.0005145446245357329}. Best is trial 72 with value: -7079.080078125. [0m
[32m[I 2022-01-23 00:56:26	956] [0m Trial 80 finished with value: -6753.56494140625 and parameters: {'r_scaling': 6.727086300582676	'unroll': 9	'update_epoch': 14	'discount': 0.9548321284720866	'lr': 0.00039505844205442583	'entropy': 0.00850074280493404}. Best is trial 72 with value: -7079.080078125. [0m
[32m[I 2022-01-23 00:59:38	869] [0m Trial 81 finished with value: -6994.6123046875 and parameters: {'r_scaling': 45.157092643767285	'unroll': 10	'update_epoch': 12	'discount': 0.953534650619697	'lr': 0.00028283299587948256	'entropy': 0.0010432487828593983}. Best is trial 72 with value: -7079.080078125. [0m
[32m[I 2022-01-23 01:03:09	635] [0m Trial 82 finished with value: -6956.15283203125 and parameters: {'r_scaling': 77.07341057327221	'unroll': 10	'update_epoch': 12	'discount': 0.9631299931030165	'lr': 0.0002967105732226048	'entropy': 0.05307015668757518}. Best is trial 72 with value: -7079.080078125. [0m
[32m[I 2022-01-23 01:06:16	074] [0m Trial 83 finished with value: -5813.435546875 and parameters: {'r_scaling': 98.45147613507866	'unroll': 11	'update_epoch': 13	'discount': 0.9687560441606071	'lr': 0.00022251138879637964	'entropy': 0.03212808872863961}. Best is trial 72 with value: -7079.080078125. [0m
[32m[I 2022-01-23 01:09:29	924] [0m Trial 84 finished with value: -6861.94091796875 and parameters: {'r_scaling': 67.85627036348443	'unroll': 8	'update_epoch': 13	'discount': 0.9502795184504911	'lr': 0.0003066627634768478	'entropy': 0.03871931711857384}. Best is trial 72 with value: -7079.080078125. [0m
[32m[I 2022-01-23 01:12:51	825] [0m Trial 85 finished with value: -6822.24755859375 and parameters: {'r_scaling': 68.45735065961468	'unroll': 10	'update_epoch': 11	'discount': 0.9364390588898963	'lr': 0.00025159904530812496	'entropy': 0.06290117990665596}. Best is trial 72 with value: -7079.080078125. [0m
[32m[I 2022-01-23 01:16:21	652] [0m Trial 86 finished with value: -742.42138671875 and parameters: {'r_scaling': 0.06080508545421473	'unroll': 5	'update_epoch': 10	'discount': 0.9639342876977106	'lr': 0.00028775720295451146	'entropy': 0.06794819154995901}. Best is trial 72 with value: -7079.080078125. [0m
[32m[I 2022-01-23 01:19:49	809] [0m Trial 87 finished with value: -6804.96142578125 and parameters: {'r_scaling': 49.24540039221262	'unroll': 10	'update_epoch': 12	'discount': 0.9576190589074478	'lr': 0.00033393292074043724	'entropy': 0.0009735459183774572}. Best is trial 72 with value: -7079.080078125. [0m
[32m[I 2022-01-23 01:23:06	857] [0m Trial 88 finished with value: -6797.1953125 and parameters: {'r_scaling': 176.97322861596953	'unroll': 9	'update_epoch': 12	'discount': 0.9712598068444065	'lr': 0.0002818389512786818	'entropy': 0.01977915687795726}. Best is trial 72 with value: -7079.080078125. [0m
[32m[I 2022-01-23 01:26:11	562] [0m Trial 89 finished with value: -6660.2412109375 and parameters: {'r_scaling': 112.93008234932888	'unroll': 8	'update_epoch': 11	'discount': 0.9533965495681016	'lr': 0.000361427379499942	'entropy': 0.09663765950386392}. Best is trial 72 with value: -7079.080078125. [0m
[32m[I 2022-01-23 01:29:39	278] [0m Trial 90 finished with value: -6955.40380859375 and parameters: {'r_scaling': 37.87891501096859	'unroll': 9	'update_epoch': 14	'discount': 0.9628718462860469	'lr': 0.0002013601096219789	'entropy': 0.00043074456400645156}. Best is trial 72 with value: -7079.080078125. [0m
[32m[I 2022-01-23 01:33:06	451] [0m Trial 91 finished with value: -6669.06591796875 and parameters: {'r_scaling': 35.73410997037987	'unroll': 9	'update_epoch': 14	'discount': 0.9626671862220695	'lr': 0.00015250157807902433	'entropy': 0.04814198699899267}. Best is trial 72 with value: -7079.080078125. [0m
[32m[I 2022-01-23 01:36:51	265] [0m Trial 92 finished with value: -6614.75732421875 and parameters: {'r_scaling': 59.893543102190144	'unroll': 10	'update_epoch': 15	'discount': 0.9587768946054839	'lr': 0.0001341250821689906	'entropy': 0.00045195373545811986}. Best is trial 72 with value: -7079.080078125. [0m
[32m[I 2022-01-23 01:40:04	073] [0m Trial 93 finished with value: -6822.4013671875 and parameters: {'r_scaling': 82.51428502115493	'unroll': 9	'update_epoch': 13	'discount': 0.9665022793752	'lr': 0.000267439341453866	'entropy': 0.00033182119771006804}. Best is trial 72 with value: -7079.080078125. [0m
[32m[I 2022-01-23 01:43:44	664] [0m Trial 94 finished with value: -6657.7265625 and parameters: {'r_scaling': 39.06437491179519	'unroll': 10	'update_epoch': 14	'discount': 0.9324987863849731	'lr': 0.00018781652955663242	'entropy': 0.0011554929392973124}. Best is trial 72 with value: -7079.080078125. [0m
[32m[I 2022-01-23 01:47:16	230] [0m Trial 95 finished with value: -6890.91748046875 and parameters: {'r_scaling': 43.885861853105645	'unroll': 7	'update_epoch': 13	'discount': 0.9553208634513046	'lr': 0.0003196214430093947	'entropy': 0.0001704958868955948}. Best is trial 72 with value: -7079.080078125. [0m
[32m[I 2022-01-23 01:50:28	933] [0m Trial 96 finished with value: -6845.583984375 and parameters: {'r_scaling': 5.137335309341521	'unroll': 8	'update_epoch': 12	'discount': 0.9391501422740034	'lr': 0.00022981683245066464	'entropy': 0.014440705716454371}. Best is trial 72 with value: -7079.080078125. [0m
[32m[I 2022-01-23 01:54:08	350] [0m Trial 97 finished with value: -6894.1337890625 and parameters: {'r_scaling': 18.325387595559217	'unroll': 10	'update_epoch': 14	'discount': 0.9645845848887683	'lr': 0.00019646446140289295	'entropy': 0.00040726474465156546}. Best is trial 72 with value: -7079.080078125. [0m
[32m[I 2022-01-23 01:56:59	311] [0m Trial 98 finished with value: -6279.13623046875 and parameters: {'r_scaling': 126.1531285967565	'unroll': 11	'update_epoch': 13	'discount': 0.9727741999891774	'lr': 0.00047466644234908753	'entropy': 0.00021930640866761248}. Best is trial 72 with value: -7079.080078125. [0m
[32m[I 2022-01-23 02:00:17	065] [0m Trial 99 finished with value: -6987.39208984375 and parameters: {'r_scaling': 3.6284648828237445	'unroll': 9	'update_epoch': 12	'discount': 0.95194625418327	'lr': 0.00025153552593541213	'entropy': 0.0007475567180081038}. Best is trial 72 with value: -7079.080078125. [0m
[32m[I 2022-01-23 02:03:01	204] [0m Trial 100 finished with value: -4413.18701171875 and parameters: {'r_scaling': 4.016618377956233	'unroll': 9	'update_epoch': 4	'discount': 0.95109019258899	'lr': 0.00017545957867675518	'entropy': 0.0007399225610889528}. Best is trial 72 with value: -7079.080078125. [0m
[32m[I 2022-01-23 02:06:03	043] [0m Trial 101 finished with value: -6617.4951171875 and parameters: {'r_scaling': 25.217179591201656	'unroll': 9	'update_epoch': 12	'discount': 0.9466078794855419	'lr': 0.00024981506531458904	'entropy': 0.0006092388188250554}. Best is trial 72 with value: -7079.080078125. [0m
[32m[I 2022-01-23 02:09:17	038] [0m Trial 102 finished with value: -6728.287109375 and parameters: {'r_scaling': 3.2698007886822267	'unroll': 9	'update_epoch': 11	'discount': 0.9536709371721233	'lr': 0.00021957451986678536	'entropy': 0.0008961093500141574}. Best is trial 72 with value: -7079.080078125. [0m
[32m[I 2022-01-23 02:12:11	806] [0m Trial 103 finished with value: -6747.26806640625 and parameters: {'r_scaling': 7.983890078086391	'unroll': 8	'update_epoch': 12	'discount': 0.9675976915537495	'lr': 0.00029711838519815595	'entropy': 0.0006901122506079422}. Best is trial 72 with value: -7079.080078125. [0m
[32m[I 2022-01-23 02:15:47	066] [0m Trial 104 finished with value: -6882.00048828125 and parameters: {'r_scaling': 5.852297594479449	'unroll': 10	'update_epoch': 13	'discount': 0.9609414740364782	'lr': 0.000199233694929838	'entropy': 0.0004793650959058957}. Best is trial 72 with value: -7079.080078125. [0m
[32m[I 2022-01-23 02:19:00	608] [0m Trial 105 finished with value: -6866.05419921875 and parameters: {'r_scaling': 54.48211589174145	'unroll': 9	'update_epoch': 11	'discount': 0.9272112016239661	'lr': 0.00027220187063942743	'entropy': 0.0002957362385148462}. Best is trial 72 with value: -7079.080078125. [0m
[32m[I 2022-01-23 02:21:47	710] [0m Trial 106 finished with value: -6382.8798828125 and parameters: {'r_scaling': 8.871865940729563	'unroll': 11	'update_epoch': 12	'discount': 0.9628321409536649	'lr': 0.00035399327701113667	'entropy': 0.00112105527289217}. Best is trial 72 with value: -7079.080078125. [0m
[32m[I 2022-01-23 02:25:39	456] [0m Trial 107 finished with value: -7082.9423828125 and parameters: {'r_scaling': 2.9290051452151724	'unroll': 10	'update_epoch': 15	'discount': 0.9444797951719034	'lr': 0.00023755830063628203	'entropy': 0.00025315702788551676}. Best is trial 107 with value: -7082.9423828125. [0m
[32m[I 2022-01-23 02:29:24	469] [0m Trial 108 finished with value: 100.45449829101562 and parameters: {'r_scaling': 2.627319278963894	'unroll': 10	'update_epoch': 15	'discount': 0.9442595079099203	'lr': 0.0013111873472482678	'entropy': 0.0005505177063381083}. Best is trial 107 with value: -7082.9423828125. [0m
[32m[I 2022-01-23 02:32:59	724] [0m Trial 109 finished with value: -6931.1552734375 and parameters: {'r_scaling': 3.7845820766920846	'unroll': 9	'update_epoch': 15	'discount': 0.949025328620796	'lr': 0.00024302778184956517	'entropy': 0.0015259347383059824}. Best is trial 107 with value: -7082.9423828125. [0m
[32m[I 2022-01-23 02:36:38	709] [0m Trial 110 finished with value: -7166.94921875 and parameters: {'r_scaling': 5.207602131575914	'unroll': 10	'update_epoch': 14	'discount': 0.9421726331897569	'lr': 0.00023453353520233553	'entropy': 0.008317642021610774}. Best is trial 110 with value: -7166.94921875. [0m
[32m[I 2022-01-23 02:40:01	423] [0m Trial 111 finished with value: -6922.3623046875 and parameters: {'r_scaling': 4.9392923823441865	'unroll': 10	'update_epoch': 14	'discount': 0.9421568524987185	'lr': 0.00021067460457779678	'entropy': 0.0009047391019256746}. Best is trial 110 with value: -7166.94921875. [0m
[32m[I 2022-01-23 02:43:25	018] [0m Trial 112 finished with value: -7086.6875 and parameters: {'r_scaling': 2.8458860851271948	'unroll': 8	'update_epoch': 15	'discount': 0.946170610256086	'lr': 0.00023693442344819128	'entropy': 0.0006671901353197259}. Best is trial 110 with value: -7166.94921875. [0m
[32m[I 2022-01-23 02:46:46	380] [0m Trial 113 finished with value: -6989.83740234375 and parameters: {'r_scaling': 2.9398724331667734	'unroll': 8	'update_epoch': 14	'discount': 0.9444623050651837	'lr': 0.00023001003878136435	'entropy': 0.008945842580149115}. Best is trial 110 with value: -7166.94921875. [0m
[32m[I 2022-01-23 02:50:12	076] [0m Trial 114 finished with value: -7014.087890625 and parameters: {'r_scaling': 1.871120159480295	'unroll': 8	'update_epoch': 15	'discount': 0.9463291866163103	'lr': 0.0002532372007716255	'entropy': 0.010072227631648915}. Best is trial 110 with value: -7166.94921875. [0m
[32m[I 2022-01-23 02:54:06	258] [0m Trial 115 finished with value: -7037.5478515625 and parameters: {'r_scaling': 2.396527300477288	'unroll': 7	'update_epoch': 15	'discount': 0.9394811369541173	'lr': 0.00022664285210218746	'entropy': 0.007492849953996145}. Best is trial 110 with value: -7166.94921875. [0m
[32m[I 2022-01-23 02:57:51	306] [0m Trial 116 finished with value: -7185.205078125 and parameters: {'r_scaling': 1.8887245960802035	'unroll': 7	'update_epoch': 15	'discount': 0.9399068928462095	'lr': 0.00023047609424177237	'entropy': 0.009234388113850965}. Best is trial 116 with value: -7185.205078125. [0m
[32m[I 2022-01-23 03:01:51	507] [0m Trial 117 finished with value: -6740.4169921875 and parameters: {'r_scaling': 1.8658519049216615	'unroll': 7	'update_epoch': 15	'discount': 0.9400963225997758	'lr': 0.00023015588012886463	'entropy': 0.008829763760053717}. Best is trial 116 with value: -7185.205078125. [0m
[32m[I 2022-01-23 03:06:02	966] [0m Trial 118 finished with value: -7250.58642578125 and parameters: {'r_scaling': 0.926351638249379	'unroll': 7	'update_epoch': 15	'discount': 0.9467566236573248	'lr': 0.0002543950152125533	'entropy': 0.007395733004857856}. Best is trial 118 with value: -7250.58642578125. [0m
[32m[I 2022-01-23 03:10:50	290] [0m Trial 119 finished with value: -6906.76318359375 and parameters: {'r_scaling': 0.8937946506363721	'unroll': 6	'update_epoch': 15	'discount': 0.9376903496881697	'lr': 0.0002513530548744845	'entropy': 0.005467746396160233}. Best is trial 118 with value: -7250.58642578125. [0m
[32m[I 2022-01-23 03:14:14	095] [0m Trial 120 finished with value: -6705.31201171875 and parameters: {'r_scaling': 0.5188935279440483	'unroll': 7	'update_epoch': 15	'discount': 0.9465565450716659	'lr': 0.00017638250204861635	'entropy': 0.007556940438012554}. Best is trial 118 with value: -7250.58642578125. [0m
[32m[I 2022-01-23 03:17:38	441] [0m Trial 121 finished with value: -6888.30419921875 and parameters: {'r_scaling': 1.2199494151520531	'unroll': 7	'update_epoch': 15	'discount': 0.9427878049886562	'lr': 0.0002150167706894728	'entropy': 0.011703105465142631}. Best is trial 118 with value: -7250.58642578125. [0m
[32m[I 2022-01-23 03:20:47	806] [0m Trial 122 finished with value: -7051.9912109375 and parameters: {'r_scaling': 2.848628085936786	'unroll': 8	'update_epoch': 15	'discount': 0.944416581087591	'lr': 0.0002341778001330142	'entropy': 0.009926723301494455}. Best is trial 118 with value: -7250.58642578125. [0m
[32m[I 2022-01-23 03:23:57	728] [0m Trial 123 finished with value: -6976.20556640625 and parameters: {'r_scaling': 2.3263813379222444	'unroll': 8	'update_epoch': 15	'discount': 0.9449310758693786	'lr': 0.00023217369133486806	'entropy': 0.01021941480276122}. Best is trial 118 with value: -7250.58642578125. [0m
[32m[I 2022-01-23 03:28:15	974] [0m Trial 124 finished with value: -6969.99072265625 and parameters: {'r_scaling': 1.586253537833303	'unroll': 7	'update_epoch': 15	'discount': 0.9466576119865864	'lr': 0.00025291904501090515	'entropy': 0.01003904760625798}. Best is trial 118 with value: -7250.58642578125. [0m
[32m[I 2022-01-23 03:32:21	819] [0m Trial 125 finished with value: -7259.3828125 and parameters: {'r_scaling': 2.0765722161815936	'unroll': 6	'update_epoch': 14	'discount': 0.9380002077321368	'lr': 0.00022577527655391337	'entropy': 0.013924734219261237}. Best is trial 125 with value: -7259.3828125. [0m
[32m[I 2022-01-23 03:36:22	370] [0m Trial 126 finished with value: -7156.3173828125 and parameters: {'r_scaling': 1.9997358870782997	'unroll': 6	'update_epoch': 14	'discount': 0.9336931301221137	'lr': 0.0002265863577591542	'entropy': 0.013202157495116317}. Best is trial 125 with value: -7259.3828125. [0m
[32m[I 2022-01-23 03:40:25	639] [0m Trial 127 finished with value: -6823.90283203125 and parameters: {'r_scaling': 2.0055723714008327	'unroll': 6	'update_epoch': 15	'discount': 0.9403322090054531	'lr': 0.0001878143955923949	'entropy': 0.014074218991675656}. Best is trial 125 with value: -7259.3828125. [0m
[32m[I 2022-01-23 03:44:23	642] [0m Trial 128 finished with value: -6493.7470703125 and parameters: {'r_scaling': 1.0902651915745183	'unroll': 6	'update_epoch': 14	'discount': 0.9332265753047144	'lr': 0.00027125971612009995	'entropy': 0.006684795927177155}. Best is trial 125 with value: -7259.3828125. [0m
[32m[I 2022-01-23 03:48:23	377] [0m Trial 129 finished with value: -6319.2880859375 and parameters: {'r_scaling': 1.558792820547998	'unroll': 5	'update_epoch': 14	'discount': 0.9354541455917031	'lr': 0.00020485889749479236	'entropy': 0.017924871585818604}. Best is trial 125 with value: -7259.3828125. [0m
[32m[I 2022-01-23 03:52:15	451] [0m Trial 130 finished with value: -7240.86572265625 and parameters: {'r_scaling': 0.42523692904730787	'unroll': 7	'update_epoch': 15	'discount': 0.9384321133608708	'lr': 0.0002355769223476679	'entropy': 0.004889401148628839}. Best is trial 125 with value: -7259.3828125. [0m
[32m[I 2022-01-23 03:56:04	503] [0m Trial 131 finished with value: -6754.53857421875 and parameters: {'r_scaling': 0.3773876649651801	'unroll': 7	'update_epoch': 15	'discount': 0.9296179635163826	'lr': 0.00022733192723948785	'entropy': 0.004849719934835418}. Best is trial 125 with value: -7259.3828125. [0m
[32m[I 2022-01-23 03:59:41	705] [0m Trial 132 finished with value: -6615.11376953125 and parameters: {'r_scaling': 0.2141361749931791	'unroll': 6	'update_epoch': 15	'discount': 0.9367767819057926	'lr': 0.00024390316465091173	'entropy': 0.006922567713448157}. Best is trial 125 with value: -7259.3828125. [0m
[32m[I 2022-01-23 04:04:03	900] [0m Trial 133 finished with value: -7111.61865234375 and parameters: {'r_scaling': 1.3807290309084448	'unroll': 5	'update_epoch': 15	'discount': 0.9392154047970827	'lr': 0.00021936738923329817	'entropy': 0.012806110778765199}. Best is trial 125 with value: -7259.3828125. [0m
[32m[I 2022-01-23 04:08:08	203] [0m Trial 134 finished with value: -6761.81689453125 and parameters: {'r_scaling': 0.728889247763835	'unroll': 4	'update_epoch': 15	'discount': 0.9413637021831608	'lr': 0.00021480321862307533	'entropy': 0.013280325748609583}. Best is trial 125 with value: -7259.3828125. [0m
[32m[I 2022-01-23 04:12:13	776] [0m Trial 135 finished with value: -7021.29833984375 and parameters: {'r_scaling': 2.1810887764609648	'unroll': 6	'update_epoch': 15	'discount': 0.9385972451046576	'lr': 0.00023747524570675408	'entropy': 0.016137173373726672}. Best is trial 125 with value: -7259.3828125. [0m
[32m[I 2022-01-23 04:16:11	706] [0m Trial 136 finished with value: -6726.81103515625 and parameters: {'r_scaling': 1.3245441448624702	'unroll': 6	'update_epoch': 14	'discount': 0.938552950853334	'lr': 0.0001865091830044577	'entropy': 0.016072052828665553}. Best is trial 125 with value: -7259.3828125. [0m
[32m[I 2022-01-23 04:20:07	953] [0m Trial 137 finished with value: -6902.88671875 and parameters: {'r_scaling': 2.8390504688193134	'unroll': 6	'update_epoch': 14	'discount': 0.9343022635102757	'lr': 0.00015757270709739745	'entropy': 0.020870523592008337}. Best is trial 125 with value: -7259.3828125. [0m
[32m[I 2022-01-23 04:24:16	497] [0m Trial 138 finished with value: -7043.537109375 and parameters: {'r_scaling': 2.209621503416563	'unroll': 5	'update_epoch': 15	'discount': 0.930564207990518	'lr': 0.0002367337123842445	'entropy': 0.012128294332257926}. Best is trial 125 with value: -7259.3828125. [0m
[32m[I 2022-01-23 04:28:19	654] [0m Trial 139 finished with value: -6156.78955078125 and parameters: {'r_scaling': 2.0552505719868037	'unroll': 4	'update_epoch': 15	'discount': 0.924977995988903	'lr': 0.00019886861664562767	'entropy': 0.0038202191250112944}. Best is trial 125 with value: -7259.3828125. [0m
[32m[I 2022-01-23 04:32:25	240] [0m Trial 140 finished with value: -6485.328125 and parameters: {'r_scaling': 2.2878607233544135	'unroll': 5	'update_epoch': 15	'discount': 0.9291349612505311	'lr': 0.00022019383025917726	'entropy': 0.012619176867838096}. Best is trial 125 with value: -7259.3828125. [0m
[32m[I 2022-01-23 04:36:25	666] [0m Trial 141 finished with value: -6444.431640625 and parameters: {'r_scaling': 0.12799572056048344	'unroll': 5	'update_epoch': 14	'discount': 0.9312303545022861	'lr': 0.00023651212611736297	'entropy': 0.00818466051929533}. Best is trial 125 with value: -7259.3828125. [0m
[32m[I 2022-01-23 04:40:15	083] [0m Trial 142 finished with value: -6887.89990234375 and parameters: {'r_scaling': 1.3657551719600973	'unroll': 5	'update_epoch': 15	'discount': 0.9385808048802201	'lr': 0.0002673745510693552	'entropy': 0.011161127863449579}. Best is trial 125 with value: -7259.3828125. [0m
[32m[I 2022-01-23 04:44:11	634] [0m Trial 143 finished with value: -6845.20703125 and parameters: {'r_scaling': 0.9752798587094701	'unroll': 6	'update_epoch': 14	'discount': 0.9422696534376065	'lr': 0.00021717106858832358	'entropy': 0.006226112391365606}. Best is trial 125 with value: -7259.3828125. [0m
[32m[I 2022-01-23 04:48:05	179] [0m Trial 144 finished with value: -6717.1748046875 and parameters: {'r_scaling': 1.6479181136766021	'unroll': 7	'update_epoch': 15	'discount': 0.934874955880783	'lr': 0.00023972538877193837	'entropy': 0.005542141911742059}. Best is trial 125 with value: -7259.3828125. [0m
[32m[I 2022-01-23 04:52:17	808] [0m Trial 145 finished with value: -6641.8544921875 and parameters: {'r_scaling': 2.4187560331970963	'unroll': 5	'update_epoch': 15	'discount': 0.9402602768611676	'lr': 0.00020767632293228287	'entropy': 0.01546035246917669}. Best is trial 125 with value: -7259.3828125. [0m
[32m[I 2022-01-23 04:56:08	410] [0m Trial 146 finished with value: -7128.9375 and parameters: {'r_scaling': 0.7494797521682176	'unroll': 7	'update_epoch': 14	'discount': 0.937244428003714	'lr': 0.0002612986473655803	'entropy': 0.020806756921646283}. Best is trial 125 with value: -7259.3828125. [0m
[32m[I 2022-01-23 04:59:59	810] [0m Trial 147 finished with value: -7086.3134765625 and parameters: {'r_scaling': 0.7291039437753458	'unroll': 7	'update_epoch': 14	'discount': 0.9321096058387575	'lr': 0.0001798632726917034	'entropy': 0.02133853905889291}. Best is trial 125 with value: -7259.3828125. [0m
[32m[I 2022-01-23 05:03:51	274] [0m Trial 148 finished with value: -7027.46044921875 and parameters: {'r_scaling': 0.7472928133325023	'unroll': 7	'update_epoch': 14	'discount': 0.9317610007499629	'lr': 0.00017615831964836075	'entropy': 0.019713086252900226}. Best is trial 125 with value: -7259.3828125. [0m
[32m[I 2022-01-23 05:07:40	667] [0m Trial 149 finished with value: -6672.9599609375 and parameters: {'r_scaling': 0.45496825856025297	'unroll': 7	'update_epoch': 14	'discount': 0.9237953890860883	'lr': 0.00016339893595678577	'entropy': 0.026395313334537256}. Best is trial 125 with value: -7259.3828125. [0m
[32m[I 2022-01-23 05:11:30	798] [0m Trial 150 finished with value: -6921.21337890625 and parameters: {'r_scaling': 0.7448181249367486	'unroll': 7	'update_epoch': 14	'discount': 0.9368251280515826	'lr': 0.00014129127851160537	'entropy': 0.023089383738388848}. Best is trial 125 with value: -7259.3828125. [0m
[32m[I 2022-01-23 05:14:58	583] [0m Trial 151 finished with value: -6904.6884765625 and parameters: {'r_scaling': 0.7361699975424371	'unroll': 7	'update_epoch': 14	'discount': 0.9323805166527304	'lr': 0.0001820262875828901	'entropy': 0.03214023150130351}. Best is trial 125 with value: -7259.3828125. [0m
[32m[I 2022-01-23 05:18:49	081] [0m Trial 152 finished with value: -6850.97705078125 and parameters: {'r_scaling': 0.6350748500184248	'unroll': 7	'update_epoch': 14	'discount': 0.9281985829679762	'lr': 0.0001672739355889476	'entropy': 0.01899724821355691}. Best is trial 125 with value: -7259.3828125. [0m
[32m[I 2022-01-23 05:22:42	424] [0m Trial 153 finished with value: -6759.55224609375 and parameters: {'r_scaling': 0.3670326711312162	'unroll': 7	'update_epoch': 15	'discount': 0.9313437732168249	'lr': 0.00019659294304634625	'entropy': 0.021978827752940473}. Best is trial 125 with value: -7259.3828125. [0m
[32m[I 2022-01-23 05:26:44	162] [0m Trial 154 finished with value: -7043.2607421875 and parameters: {'r_scaling': 1.129556259448717	'unroll': 6	'update_epoch': 14	'discount': 0.9343785304286705	'lr': 0.00014579438929407344	'entropy': 0.012228935963773774}. Best is trial 125 with value: -7259.3828125. [0m
[32m[I 2022-01-23 05:30:24	055] [0m Trial 155 finished with value: -7238.21044921875 and parameters: {'r_scaling': 1.4281818687975738	'unroll': 5	'update_epoch': 15	'discount': 0.9346210532938668	'lr': 0.00010160283601441497	'entropy': 0.012242633998327864}. Best is trial 125 with value: -7259.3828125. [0m
[32m[I 2022-01-23 05:34:06	694] [0m Trial 156 finished with value: -7119.4658203125 and parameters: {'r_scaling': 1.0374610348321978	'unroll': 5	'update_epoch': 15	'discount': 0.9339188979455116	'lr': 0.00010172523256084144	'entropy': 0.013220797169021645}. Best is trial 125 with value: -7259.3828125. [0m
[32m[I 2022-01-23 05:38:14	558] [0m Trial 157 finished with value: -6570.5234375 and parameters: {'r_scaling': 1.4098227151198046	'unroll': 4	'update_epoch': 15	'discount': 0.9437863236784343	'lr': 0.00012904822487529177	'entropy': 0.013308367241729726}. Best is trial 125 with value: -7259.3828125. [0m
[32m[I 2022-01-23 05:42:24	972] [0m Trial 158 finished with value: -6948.654296875 and parameters: {'r_scaling': 1.1453001710700899	'unroll': 5	'update_epoch': 15	'discount': 0.9360766449361559	'lr': 0.00010682698794193792	'entropy': 0.01116491429327365}. Best is trial 125 with value: -7259.3828125. [0m
[32m[I 2022-01-23 05:46:30	391] [0m Trial 159 finished with value: -6821.13232421875 and parameters: {'r_scaling': 0.8365759240290467	'unroll': 4	'update_epoch': 15	'discount': 0.9487450772675018	'lr': 0.00012489848175000956	'entropy': 0.010209492805031025}. Best is trial 125 with value: -7259.3828125. [0m
[32m[I 2022-01-23 05:50:55	393] [0m Trial 160 finished with value: -6706.98583984375 and parameters: {'r_scaling': 1.0029072488871027	'unroll': 5	'update_epoch': 15	'discount': 0.9337831944319698	'lr': 0.00011425126398525801	'entropy': 0.008980396007405987}. Best is trial 125 with value: -7259.3828125. [0m
[32m[I 2022-01-23 05:54:25	401] [0m Trial 161 finished with value: -7140.76123046875 and parameters: {'r_scaling': 1.1697305008231464	'unroll': 6	'update_epoch': 14	'discount': 0.9350475688509189	'lr': 0.00014213949894146448	'entropy': 0.017301245153447692}. Best is trial 125 with value: -7259.3828125. [0m
[32m[I 2022-01-23 05:58:29	628] [0m Trial 162 finished with value: -6856.87744140625 and parameters: {'r_scaling': 0.5532011852948135	'unroll': 6	'update_epoch': 14	'discount': 0.942066890088095	'lr': 0.00012223950746082939	'entropy': 0.016719129836906207}. Best is trial 125 with value: -7259.3828125. [0m
[32m[I 2022-01-23 06:02:34	069] [0m Trial 163 finished with value: -6816.5888671875 and parameters: {'r_scaling': 3.0650189921797586	'unroll': 6	'update_epoch': 14	'discount': 0.937524214210612	'lr': 0.000118991644335794	'entropy': 0.014145004976329003}. Best is trial 125 with value: -7259.3828125. [0m
[32m[I 2022-01-23 06:06:49	178] [0m Trial 164 finished with value: -6831.72705078125 and parameters: {'r_scaling': 1.5816954220554174	'unroll': 5	'update_epoch': 15	'discount': 0.9356270225971789	'lr': 0.00010311460098936071	'entropy': 0.014206784184918062}. Best is trial 125 with value: -7259.3828125. [0m
[32m[I 2022-01-23 06:10:56	450] [0m Trial 165 finished with value: -6491.265625 and parameters: {'r_scaling': 1.740178464453267	'unroll': 4	'update_epoch': 15	'discount': 0.9300778707507523	'lr': 0.00010923064617494676	'entropy': 0.011889691822833158}. Best is trial 125 with value: -7259.3828125. [0m
[32m[I 2022-01-23 06:15:05	369] [0m Trial 166 finished with value: -6945.5859375 and parameters: {'r_scaling': 1.372285665063537	'unroll': 5	'update_epoch': 14	'discount': 0.9414262582610056	'lr': 0.00010099582421657153	'entropy': 0.009048194470362961}. Best is trial 125 with value: -7259.3828125. [0m
[32m[I 2022-01-23 06:18:42	214] [0m Trial 167 finished with value: -6954.06640625 and parameters: {'r_scaling': 0.9583476854374035	'unroll': 8	'update_epoch': 15	'discount': 0.9442798585855047	'lr': 0.00027001657755016317	'entropy': 0.017676076299337273}. Best is trial 125 with value: -7259.3828125. [0m
[32m[I 2022-01-23 06:22:44	459] [0m Trial 168 finished with value: -7026.388671875 and parameters: {'r_scaling': 1.1921811048735487	'unroll': 6	'update_epoch': 14	'discount': 0.9331383781432142	'lr': 0.00020688799645951372	'entropy': 0.02977995854981961}. Best is trial 125 with value: -7259.3828125. [0m
[32m[I 2022-01-23 06:27:02	780] [0m Trial 169 finished with value: -6864.54541015625 and parameters: {'r_scaling': 0.4476814359407867	'unroll': 6	'update_epoch': 15	'discount': 0.9402842133590236	'lr': 0.0002556748909541963	'entropy': 0.015305999536559799}. Best is trial 125 with value: -7259.3828125. [0m
[32m[I 2022-01-23 06:31:05	541] [0m Trial 170 finished with value: -6648.484375 and parameters: {'r_scaling': 1.8773972570468447	'unroll': 6	'update_epoch': 14	'discount': 0.9374392447772092	'lr': 0.00022244684754712914	'entropy': 0.007927646439473895}. Best is trial 125 with value: -7259.3828125. [0m
[32m[I 2022-01-23 06:35:10	820] [0m Trial 171 finished with value: -6972.21484375 and parameters: {'r_scaling': 1.1025311415512322	'unroll': 5	'update_epoch': 14	'discount': 0.9343596764034321	'lr': 0.00013771601171667016	'entropy': 0.01255967920630054}. Best is trial 125 with value: -7259.3828125. [0m
[32m[I 2022-01-23 06:38:46	435] [0m Trial 172 finished with value: -7142.1396484375 and parameters: {'r_scaling': 1.251662406628042	'unroll': 6	'update_epoch': 15	'discount': 0.9352816152397948	'lr': 0.00023921292172236162	'entropy': 0.012031811232068817}. Best is trial 125 with value: -7259.3828125. [0m
[32m[I 2022-01-23 06:43:24	309] [0m Trial 173 finished with value: -6846.8291015625 and parameters: {'r_scaling': 0.8315528498805556	'unroll': 3	'update_epoch': 15	'discount': 0.9474412710166753	'lr': 0.00023914938726951357	'entropy': 0.009859261657558195}. Best is trial 125 with value: -7259.3828125. [0m
[32m[I 2022-01-23 06:47:35	388] [0m Trial 174 finished with value: -6646.939453125 and parameters: {'r_scaling': 0.27198851788377154	'unroll': 5	'update_epoch': 15	'discount': 0.9306986039119125	'lr': 0.00028354602519927813	'entropy': 0.011238294393251672}. Best is trial 125 with value: -7259.3828125. [0m
[32m[I 2022-01-23 06:51:43	408] [0m Trial 175 finished with value: -6717.16064453125 and parameters: {'r_scaling': 2.9924331573942835	'unroll': 6	'update_epoch': 15	'discount': 0.9363127274189672	'lr': 0.000256382606134192	'entropy': 0.019470012794891987}. Best is trial 125 with value: -7259.3828125. [0m
[32m[I 2022-01-23 06:55:16	988] [0m Trial 176 finished with value: -6958.15576171875 and parameters: {'r_scaling': 1.8672263347983125	'unroll': 8	'update_epoch': 15	'discount': 0.932961849236888	'lr': 0.00022700468953366684	'entropy': 0.004404999857994954}. Best is trial 125 with value: -7259.3828125. [0m
[32m[I 2022-01-23 06:59:06	683] [0m Trial 177 finished with value: -7366.27294921875 and parameters: {'r_scaling': 1.4154373064922898	'unroll': 7	'update_epoch': 15	'discount': 0.9432981656011775	'lr': 0.00019122085620576279	'entropy': 0.007104145710132769}. Best is trial 177 with value: -7366.27294921875. [0m
[32m[I 2022-01-23 07:02:32	164] [0m Trial 178 finished with value: -6828.87353515625 and parameters: {'r_scaling': 0.6648576340620961	'unroll': 7	'update_epoch': 8	'discount': 0.9435428359272402	'lr': 0.00019312592507183504	'entropy': 0.007300353182243471}. Best is trial 177 with value: -7366.27294921875. [0m
[32m[I 2022-01-23 07:06:18	685] [0m Trial 179 finished with value: -7023.345703125 and parameters: {'r_scaling': 1.332567373059343	'unroll': 7	'update_epoch': 14	'discount': 0.9451397857323537	'lr': 0.00020324152248763972	'entropy': 0.009321390182504144}. Best is trial 177 with value: -7366.27294921875. [0m
[32m[I 2022-01-23 07:09:53	878] [0m Trial 180 finished with value: -6823.5029296875 and parameters: {'r_scaling': 0.8837739307665098	'unroll': 8	'update_epoch': 15	'discount': 0.93936713325505	'lr': 0.00021143692711450305	'entropy': 0.0057239784433303145}. Best is trial 177 with value: -7366.27294921875. [0m
[32m[I 2022-01-23 07:14:01	988] [0m Trial 181 finished with value: -6874.76708984375 and parameters: {'r_scaling': 2.456137719067656	'unroll': 6	'update_epoch': 15	'discount': 0.9499320617389575	'lr': 0.00024160168935563093	'entropy': 0.013077488430642244}. Best is trial 177 with value: -7366.27294921875. [0m
[32m[I 2022-01-23 07:17:53	692] [0m Trial 182 finished with value: -7119.2490234375 and parameters: {'r_scaling': 1.4578299567946722	'unroll': 7	'update_epoch': 15	'discount': 0.941470567485679	'lr': 0.00021895540517980502	'entropy': 0.02419844993681384}. Best is trial 177 with value: -7366.27294921875. [0m
[32m[I 2022-01-23 07:21:47	203] [0m Trial 183 finished with value: -6964.73046875 and parameters: {'r_scaling': 1.631928748184675	'unroll': 7	'update_epoch': 15	'discount': 0.9425113081630024	'lr': 0.00021619813051989211	'entropy': 0.024224077358093885}. Best is trial 177 with value: -7366.27294921875. [0m
[32m[I 2022-01-23 07:25:37	890] [0m Trial 184 finished with value: -6917.8427734375 and parameters: {'r_scaling': 1.2197961035493727	'unroll': 7	'update_epoch': 14	'discount': 0.9406751538281551	'lr': 0.00018860618304861792	'entropy': 0.017440971330966754}. Best is trial 177 with value: -7366.27294921875. [0m
[32m[I 2022-01-23 07:29:32	155] [0m Trial 185 finished with value: -7162.287109375 and parameters: {'r_scaling': 1.4696740737120713	'unroll': 7	'update_epoch': 15	'discount': 0.9387923978675514	'lr': 0.00022468511781214334	'entropy': 0.006532530565431097}. Best is trial 177 with value: -7366.27294921875. [0m
[32m[I 2022-01-23 07:33:21	109] [0m Trial 186 finished with value: -7191.89892578125 and parameters: {'r_scaling': 1.474936576601867	'unroll': 7	'update_epoch': 14	'discount': 0.9386080993396778	'lr': 0.00022477265049044843	'entropy': 0.003119306720325582}. Best is trial 177 with value: -7366.27294921875. [0m
[32m[I 2022-01-23 07:35:40	799] [0m Trial 187 finished with value: -2570.67822265625 and parameters: {'r_scaling': 1.4703104289723083	'unroll': 7	'update_epoch': 1	'discount': 0.9382799673233055	'lr': 0.00021918380002608059	'entropy': 0.00619332711107096}. Best is trial 177 with value: -7366.27294921875. [0m
[32m[I 2022-01-23 07:39:30	196] [0m Trial 188 finished with value: -6733.71923828125 and parameters: {'r_scaling': 1.0417977449635687	'unroll': 7	'update_epoch': 14	'discount': 0.9364711960000742	'lr': 0.00019566580393891534	'entropy': 0.0033579912670651827}. Best is trial 177 with value: -7366.27294921875. [0m
[32m[I 2022-01-23 07:43:33	517] [0m Trial 189 finished with value: -6511.1455078125 and parameters: {'r_scaling': 1.5835885964292993	'unroll': 6	'update_epoch': 15	'discount': 0.9388928528356023	'lr': 0.0002615323620643595	'entropy': 0.005057729403031425}. Best is trial 177 with value: -7366.27294921875. [0m
[32m[I 2022-01-23 07:46:18	595] [0m Trial 190 finished with value: -3389.766845703125 and parameters: {'r_scaling': 1.2696229242287063	'unroll': 7	'update_epoch': 2	'discount': 0.9354179981667297	'lr': 0.00020711524451725796	'entropy': 0.03874159958167548}. Best is trial 177 with value: -7366.27294921875. [0m
[32m[I 2022-01-23 07:50:13	593] [0m Trial 191 finished with value: -7000.73193359375 and parameters: {'r_scaling': 1.9590744239278897	'unroll': 7	'update_epoch': 15	'discount': 0.9415052936693843	'lr': 0.00022065939249550152	'entropy': 0.026590750724653205}. Best is trial 177 with value: -7366.27294921875. [0m
[32m[I 2022-01-23 07:54:10	083] [0m Trial 192 finished with value: -6664.1376953125 and parameters: {'r_scaling': 0.9874665653738842	'unroll': 6	'update_epoch': 14	'discount': 0.9374117368646466	'lr': 0.0002500397235993583	'entropy': 0.006925691426626195}. Best is trial 177 with value: -7366.27294921875. [0m
[32m[I 2022-01-23 07:57:57	657] [0m Trial 193 finished with value: -6990.5419921875 and parameters: {'r_scaling': 1.4339662090649177	'unroll': 7	'update_epoch': 14	'discount': 0.9401044853496109	'lr': 0.0001676286951544601	'entropy': 0.02158490989887631}. Best is trial 177 with value: -7366.27294921875. [0m
[32m[I 2022-01-23 08:01:38	678] [0m Trial 194 finished with value: -7210.5869140625 and parameters: {'r_scaling': 1.1504468067546334	'unroll': 7	'update_epoch': 13	'discount': 0.9460342116563901	'lr': 0.00022896050004362232	'entropy': 0.008244416333939481}. Best is trial 177 with value: -7366.27294921875. [0m
[32m[I 2022-01-23 08:05:33	939] [0m Trial 195 finished with value: -7016.05029296875 and parameters: {'r_scaling': 1.1838775327372528	'unroll': 7	'update_epoch': 15	'discount': 0.9422184320303243	'lr': 0.0002286340271784277	'entropy': 0.007918176568546188}. Best is trial 177 with value: -7366.27294921875. [0m
[32m[I 2022-01-23 08:09:39	297] [0m Trial 196 finished with value: -6814.810546875 and parameters: {'r_scaling': 0.8201922291162751	'unroll': 6	'update_epoch': 14	'discount': 0.9346473184301755	'lr': 0.00011190063782431495	'entropy': 0.008498452325602977}. Best is trial 177 with value: -7366.27294921875. [0m
[32m[I 2022-01-23 08:13:45	566] [0m Trial 197 finished with value: -6712.42431640625 and parameters: {'r_scaling': 1.8321677483237158	'unroll': 7	'update_epoch': 13	'discount': 0.9458390053730865	'lr': 0.00015062212600994233	'entropy': 0.0022816100216942734}. Best is trial 177 with value: -7366.27294921875. [0m
[32m[I 2022-01-23 08:18:06	913] [0m Trial 198 finished with value: -6451.84423828125 and parameters: {'r_scaling': 1.0896408886868238	'unroll': 6	'update_epoch': 15	'discount': 0.9378321338836494	'lr': 0.0002481126885535712	'entropy': 0.007238174537270732}. Best is trial 177 with value: -7366.27294921875. [0m
[32m[I 2022-01-23 08:21:48	657] [0m Trial 199 finished with value: -6884.9853515625 and parameters: {'r_scaling': 0.5942615604662168	'unroll': 6	'update_epoch': 14	'discount': 0.9395100948379919	'lr': 0.0002035510340231607	'entropy': 0.006224777966288151}. Best is trial 177 with value: -7366.27294921875. [0m
