# Supplementary material
Source: ML conference proceedings conference paper supplement (https://proceedings.neurips.cc/paper_files/paper/2022/hash/10a6bdcabbd5a3d36b760daa295f63c1-Abstract.html)
Supplement: Supplementary file 1 [file 10a6bdcabbd5a3d36b760daa295f63c1-Supplemental-Conference.zip › neurips2022/code/robotics_code/hp_searches/halfcheetah_0,625M.log]

[32m[I 2022-01-15 17:17:05	739] [0m A new study created in memory with name: no-name-31ddf281-1e0d-4b5b-a681-11c19da2848a [0m
[32m[I 2022-01-15 17:19:49	550] [0m Trial 0 finished with value: 95.86217498779297 and parameters: {'r_scaling': 0.14963184874672522	'unroll': 7	'update_epoch': 15	'discount': 0.9818646000201566	'lr': 0.00032004152188545924	'entropy': 0.005964772473628211}. Best is trial 0 with value: 95.86217498779297. [0m
[32m[I 2022-01-15 17:22:51	997] [0m Trial 1 finished with value: 97.04842376708984 and parameters: {'r_scaling': 68.75482066463162	'unroll': 12	'update_epoch': 11	'discount': 0.9100876084895383	'lr': 0.0013856867733082624	'entropy': 0.0038103700578796963}. Best is trial 0 with value: 95.86217498779297. [0m
[32m[I 2022-01-15 17:25:31	444] [0m Trial 2 finished with value: 98.85588073730469 and parameters: {'r_scaling': 24.39401158626444	'unroll': 5	'update_epoch': 9	'discount': 0.9169286861730787	'lr': 0.0001242158286221511	'entropy': 0.0004992804320972964}. Best is trial 0 with value: 95.86217498779297. [0m
[32m[I 2022-01-15 17:28:40	467] [0m Trial 3 finished with value: 97.76764678955078 and parameters: {'r_scaling': 0.2326648758967711	'unroll': 9	'update_epoch': 3	'discount': 0.9562590267026487	'lr': 0.00014809636463735914	'entropy': 0.001084352135164985}. Best is trial 0 with value: 95.86217498779297. [0m
[32m[I 2022-01-15 17:31:50	484] [0m Trial 4 finished with value: 107.07913208007812 and parameters: {'r_scaling': 0.09370548761265358	'unroll': 2	'update_epoch': 5	'discount': 0.9652442841604418	'lr': 0.0005335952139071433	'entropy': 0.06972237952486515}. Best is trial 0 with value: 95.86217498779297. [0m
[32m[I 2022-01-15 17:35:03	438] [0m Trial 5 finished with value: 101.25191497802734 and parameters: {'r_scaling': 0.08222759728258841	'unroll': 9	'update_epoch': 8	'discount': 0.9607480190722094	'lr': 0.00013021218975417967	'entropy': 0.0032069775958028456}. Best is trial 0 with value: 95.86217498779297. [0m
[32m[I 2022-01-15 17:38:15	179] [0m Trial 6 finished with value: 105.32353973388672 and parameters: {'r_scaling': 39.519025447670934	'unroll': 11	'update_epoch': 9	'discount': 0.9787736648771922	'lr': 0.0007462846789721987	'entropy': 0.0011185472693467661}. Best is trial 0 with value: 95.86217498779297. [0m
[32m[I 2022-01-15 17:41:30	042] [0m Trial 7 finished with value: 101.74685668945312 and parameters: {'r_scaling': 0.953583741561995	'unroll': 9	'update_epoch': 10	'discount': 0.959854330691792	'lr': 0.00030885675873946415	'entropy': 0.009296410586251703}. Best is trial 0 with value: 95.86217498779297. [0m
[32m[I 2022-01-15 17:44:48	037] [0m Trial 8 finished with value: 104.19219207763672 and parameters: {'r_scaling': 0.4610607742114725	'unroll': 3	'update_epoch': 12	'discount': 0.9889966014166657	'lr': 0.0006521848027687126	'entropy': 0.005509820590938249}. Best is trial 0 with value: 95.86217498779297. [0m
[32m[I 2022-01-15 17:48:08	440] [0m Trial 9 finished with value: 105.11465454101562 and parameters: {'r_scaling': 3.079282809587033	'unroll': 15	'update_epoch': 11	'discount': 0.9065238466582574	'lr': 0.0013796590357426385	'entropy': 0.0013056710368320177}. Best is trial 0 with value: 95.86217498779297. [0m
[32m[I 2022-01-15 17:51:28	684] [0m Trial 10 finished with value: 95.74079895019531 and parameters: {'r_scaling': 5.951434744791899	'unroll': 6	'update_epoch': 15	'discount': 0.9323271410725946	'lr': 0.00026967160879000563	'entropy': 0.00012542909391042198}. Best is trial 10 with value: 95.74079895019531. [0m
[32m[I 2022-01-15 17:54:45	530] [0m Trial 11 finished with value: 101.53099060058594 and parameters: {'r_scaling': 4.18246272461363	'unroll': 6	'update_epoch': 15	'discount': 0.9322322266949286	'lr': 0.0002698094767081271	'entropy': 0.00011238048209733625}. Best is trial 10 with value: 95.74079895019531. [0m
[32m[I 2022-01-15 17:57:37	692] [0m Trial 12 finished with value: 100.24342346191406 and parameters: {'r_scaling': 7.95530411139012	'unroll': 6	'update_epoch': 15	'discount': 0.9343971801666692	'lr': 0.0002875064083121984	'entropy': 0.018363484563910955}. Best is trial 10 with value: 95.74079895019531. [0m
[32m[I 2022-01-15 18:00:29	896] [0m Trial 13 finished with value: 99.815673828125 and parameters: {'r_scaling': 1.3412641279360968	'unroll': 4	'update_epoch': 13	'discount': 0.9381473720934135	'lr': 0.00022674685739054357	'entropy': 0.0003205089070397119}. Best is trial 10 with value: 95.74079895019531. [0m
[32m[I 2022-01-15 18:03:48	422] [0m Trial 14 finished with value: 106.75054168701172 and parameters: {'r_scaling': 11.721247675416503	'unroll': 1	'update_epoch': 14	'discount': 0.9222285610506755	'lr': 0.0004115067310686439	'entropy': 0.027584892285530096}. Best is trial 10 with value: 95.74079895019531. [0m
[32m[I 2022-01-15 18:07:07	607] [0m Trial 15 finished with value: 106.78358459472656 and parameters: {'r_scaling': 1.5684318870540124	'unroll': 6	'update_epoch': 6	'discount': 0.9468804746125772	'lr': 0.00018870241689250485	'entropy': 0.00013039150806119177}. Best is trial 10 with value: 95.74079895019531. [0m
[32m[I 2022-01-15 18:10:24	503] [0m Trial 16 finished with value: 95.36032104492188 and parameters: {'r_scaling': 175.68255093226372	'unroll': 7	'update_epoch': 13	'discount': 0.9944401757607033	'lr': 0.00039211400141854805	'entropy': 0.013773923464530248}. Best is trial 16 with value: 95.36032104492188. [0m
[32m[I 2022-01-15 18:13:44	102] [0m Trial 17 finished with value: 96.5210952758789 and parameters: {'r_scaling': 115.64960069465747	'unroll': 11	'update_epoch': 13	'discount': 0.9716361463898258	'lr': 0.0010207224517972604	'entropy': 0.06216100841121753}. Best is trial 16 with value: 95.36032104492188. [0m
[32m[I 2022-01-15 18:16:36	610] [0m Trial 18 finished with value: 100.49791717529297 and parameters: {'r_scaling': 197.931441135382	'unroll': 4	'update_epoch': 13	'discount': 0.9471423320683268	'lr': 0.0004741210719404918	'entropy': 0.016068701877946328}. Best is trial 16 with value: 95.36032104492188. [0m
[32m[I 2022-01-15 18:19:53	435] [0m Trial 19 finished with value: 102.01646423339844 and parameters: {'r_scaling': 14.622379128920208	'unroll': 8	'update_epoch': 2	'discount': 0.923813009789177	'lr': 0.0001992256976384501	'entropy': 0.00029516579163416085}. Best is trial 16 with value: 95.36032104492188. [0m
[32m[I 2022-01-15 18:23:13	806] [0m Trial 20 finished with value: 97.65132141113281 and parameters: {'r_scaling': 49.16335142828049	'unroll': 14	'update_epoch': 6	'discount': 0.9908698535425405	'lr': 0.0003755769632398671	'entropy': 0.002079054326520242}. Best is trial 16 with value: 95.36032104492188. [0m
[32m[I 2022-01-15 18:26:32	293] [0m Trial 21 finished with value: 102.48930358886719 and parameters: {'r_scaling': 0.33211447333923355	'unroll': 7	'update_epoch': 15	'discount': 0.9826799655978338	'lr': 0.0003167168071837795	'entropy': 0.008459660740712516}. Best is trial 16 with value: 95.36032104492188. [0m
[32m[I 2022-01-15 18:29:51	744] [0m Trial 22 finished with value: 101.70098876953125 and parameters: {'r_scaling': 3.9241857631787376	'unroll': 8	'update_epoch': 14	'discount': 0.9939145090000964	'lr': 0.0005862709965471312	'entropy': 0.030266031927757557}. Best is trial 16 with value: 95.36032104492188. [0m
[32m[I 2022-01-15 18:33:07	862] [0m Trial 23 finished with value: 105.56916809082031 and parameters: {'r_scaling': 0.18570861561952395	'unroll': 7	'update_epoch': 12	'discount': 0.9749188264644558	'lr': 0.0009111996559067435	'entropy': 0.007799121038415813}. Best is trial 16 with value: 95.36032104492188. [0m
[32m[I 2022-01-15 18:36:27	286] [0m Trial 24 finished with value: 105.2274398803711 and parameters: {'r_scaling': 0.05157665770576746	'unroll': 4	'update_epoch': 14	'discount': 0.9844073662217151	'lr': 0.00010238172929954111	'entropy': 0.01353897860158811}. Best is trial 16 with value: 95.36032104492188. [0m
[32m[I 2022-01-15 18:39:43	976] [0m Trial 25 finished with value: 96.14676666259766 and parameters: {'r_scaling': 0.6188013214837428	'unroll': 10	'update_epoch': 15	'discount': 0.9710088855515202	'lr': 0.0019801122288152237	'entropy': 0.0398927232144637}. Best is trial 16 with value: 95.36032104492188. [0m
[32m[I 2022-01-15 18:43:03	568] [0m Trial 26 finished with value: 101.7741470336914 and parameters: {'r_scaling': 25.34835829535977	'unroll': 7	'update_epoch': 12	'discount': 0.9528602645597704	'lr': 0.00038427512686906826	'entropy': 0.0020494503934121527}. Best is trial 16 with value: 95.36032104492188. [0m
[32m[I 2022-01-15 18:46:13	055] [0m Trial 27 finished with value: 97.10075378417969 and parameters: {'r_scaling': 2.483863348724861	'unroll': 5	'update_epoch': 14	'discount': 0.9420395497895167	'lr': 0.00017394373905754143	'entropy': 0.005432429594315066}. Best is trial 16 with value: 95.36032104492188. [0m
[32m[I 2022-01-15 18:49:35	191] [0m Trial 28 finished with value: 97.02410888671875 and parameters: {'r_scaling': 6.585533962505028	'unroll': 7	'update_epoch': 11	'discount': 0.9291152565012408	'lr': 0.00023106438068049468	'entropy': 0.0005953353537258158}. Best is trial 16 with value: 95.36032104492188. [0m
[32m[I 2022-01-15 18:52:51	953] [0m Trial 29 finished with value: 108.22051239013672 and parameters: {'r_scaling': 84.79859058283037	'unroll': 12	'update_epoch': 10	'discount': 0.901771329531423	'lr': 0.00035769517495968394	'entropy': 0.0046648764312536405}. Best is trial 16 with value: 95.36032104492188. [0m
[32m[I 2022-01-15 18:56:13	182] [0m Trial 30 finished with value: 101.58045196533203 and parameters: {'r_scaling': 132.75695586827166	'unroll': 5	'update_epoch': 12	'discount': 0.914219758985964	'lr': 0.0004779979092101639	'entropy': 0.002230146909871089}. Best is trial 16 with value: 95.36032104492188. [0m
[32m[I 2022-01-15 18:59:04	266] [0m Trial 31 finished with value: 96.346435546875 and parameters: {'r_scaling': 0.6722811550601923	'unroll': 10	'update_epoch': 15	'discount': 0.9704774727673148	'lr': 0.0019017250169956225	'entropy': 0.028993624697790946}. Best is trial 16 with value: 95.36032104492188. [0m
[32m[I 2022-01-15 19:02:23	591] [0m Trial 32 finished with value: 96.14635467529297 and parameters: {'r_scaling': 0.1475695541258462	'unroll': 10	'update_epoch': 15	'discount': 0.9857807737633378	'lr': 0.0019611049364550294	'entropy': 0.0432767816116381}. Best is trial 16 with value: 95.36032104492188. [0m
[32m[I 2022-01-15 19:05:45	791] [0m Trial 33 finished with value: 99.20243072509766 and parameters: {'r_scaling': 0.14539237841624328	'unroll': 13	'update_epoch': 14	'discount': 0.9862139351268188	'lr': 0.00024557548104041344	'entropy': 0.09092210735544247}. Best is trial 16 with value: 95.36032104492188. [0m
[32m[I 2022-01-15 19:09:03	344] [0m Trial 34 finished with value: 94.75520324707031 and parameters: {'r_scaling': 0.28707172689222415	'unroll': 8	'update_epoch': 13	'discount': 0.9803799836509374	'lr': 0.0007451647943132901	'entropy': 0.04875676981150044}. Best is trial 34 with value: 94.75520324707031. [0m
[32m[I 2022-01-15 19:12:24	759] [0m Trial 35 finished with value: 104.96678161621094 and parameters: {'r_scaling': 0.29190034046579805	'unroll': 8	'update_epoch': 13	'discount': 0.9948294214387091	'lr': 0.0010270655712995872	'entropy': 0.012503720857611431}. Best is trial 34 with value: 94.75520324707031. [0m
[32m[I 2022-01-15 19:15:43	352] [0m Trial 36 finished with value: 101.82614135742188 and parameters: {'r_scaling': 0.07083724139729619	'unroll': 6	'update_epoch': 11	'discount': 0.9791519319298614	'lr': 0.0007863446152561974	'entropy': 0.0033930269077962357}. Best is trial 34 with value: 94.75520324707031. [0m
[32m[I 2022-01-15 19:19:00	425] [0m Trial 37 finished with value: 96.82933044433594 and parameters: {'r_scaling': 0.10654926758650547	'unroll': 9	'update_epoch': 9	'discount': 0.9669763043691161	'lr': 0.0005335656603004584	'entropy': 0.0006806435393600955}. Best is trial 34 with value: 94.75520324707031. [0m
[32m[I 2022-01-15 19:22:18	360] [0m Trial 38 finished with value: 100.07455444335938 and parameters: {'r_scaling': 23.577577150464798	'unroll': 8	'update_epoch': 13	'discount': 0.9798324627725093	'lr': 0.00016215108992680184	'entropy': 0.022085759406546383}. Best is trial 34 with value: 94.75520324707031. [0m
[32m[I 2022-01-15 19:25:35	141] [0m Trial 39 finished with value: 99.29173278808594 and parameters: {'r_scaling': 0.4196219004885223	'unroll': 5	'update_epoch': 4	'discount': 0.9535372035583581	'lr': 0.0006906938316214705	'entropy': 0.048199304598644334}. Best is trial 34 with value: 94.75520324707031. [0m
[32m[I 2022-01-15 19:28:50	759] [0m Trial 40 finished with value: 109.19528198242188 and parameters: {'r_scaling': 1.889417479729893	'unroll': 9	'update_epoch': 8	'discount': 0.9760940480928255	'lr': 0.000333702645059311	'entropy': 0.011011480983252128}. Best is trial 34 with value: 94.75520324707031. [0m
[32m[I 2022-01-15 19:32:12	255] [0m Trial 41 finished with value: 106.54888916015625 and parameters: {'r_scaling': 0.1384858668849237	'unroll': 10	'update_epoch': 15	'discount': 0.988475442681296	'lr': 0.0015737643744483142	'entropy': 0.05791783708406424}. Best is trial 34 with value: 94.75520324707031. [0m
[32m[I 2022-01-15 19:35:29	143] [0m Trial 42 finished with value: 103.7178726196289 and parameters: {'r_scaling': 0.22155620761846248	'unroll': 9	'update_epoch': 14	'discount': 0.985065161797618	'lr': 0.0013401802354864507	'entropy': 0.0923066902223594}. Best is trial 34 with value: 94.75520324707031. [0m
[32m[I 2022-01-15 19:38:48	282] [0m Trial 43 finished with value: 110.7327651977539 and parameters: {'r_scaling': 0.8736492423869727	'unroll': 11	'update_epoch': 15	'discount': 0.961740478826899	'lr': 0.0004307633280489739	'entropy': 0.03930065063742089}. Best is trial 34 with value: 94.75520324707031. [0m
[32m[I 2022-01-15 19:42:07	146] [0m Trial 44 finished with value: 105.22781372070312 and parameters: {'r_scaling': 0.06965428297241064	'unroll': 7	'update_epoch': 13	'discount': 0.9908349384122	'lr': 0.00013526421112383124	'entropy': 0.0069678562450141285}. Best is trial 34 with value: 94.75520324707031. [0m
[32m[I 2022-01-15 19:45:23	830] [0m Trial 45 finished with value: 99.13375854492188 and parameters: {'r_scaling': 0.14619125157624752	'unroll': 3	'update_epoch': 14	'discount': 0.9807253065116754	'lr': 0.00026818450975539456	'entropy': 0.00022583105653798936}. Best is trial 34 with value: 94.75520324707031. [0m
[32m[I 2022-01-15 19:48:43	810] [0m Trial 46 finished with value: 99.39920043945312 and parameters: {'r_scaling': 0.300129387493481	'unroll': 6	'update_epoch': 12	'discount': 0.9751653420332519	'lr': 0.0005476187273705077	'entropy': 0.02079248885432425}. Best is trial 34 with value: 94.75520324707031. [0m
[32m[I 2022-01-15 19:52:04	596] [0m Trial 47 finished with value: 97.08366394042969 and parameters: {'r_scaling': 0.1029628327374566	'unroll': 8	'update_epoch': 10	'discount': 0.9654290445253467	'lr': 0.0011333430842871753	'entropy': 0.0013689988951530291}. Best is trial 34 with value: 94.75520324707031. [0m
[32m[I 2022-01-15 19:55:23	301] [0m Trial 48 finished with value: 95.86836242675781 and parameters: {'r_scaling': 0.055516736525416215	'unroll': 10	'update_epoch': 7	'discount': 0.9241370401591072	'lr': 0.0002004102295882046	'entropy': 0.04079999874056627}. Best is trial 34 with value: 94.75520324707031. [0m
[32m[I 2022-01-15 19:58:43	076] [0m Trial 49 finished with value: 98.77531433105469 and parameters: {'r_scaling': 0.05413666176424345	'unroll': 6	'update_epoch': 7	'discount': 0.9248636139245417	'lr': 0.00021317153029419493	'entropy': 0.015298698740243498}. Best is trial 34 with value: 94.75520324707031. [0m
[32m[I 2022-01-15 20:02:00	762] [0m Trial 50 finished with value: 103.07119750976562 and parameters: {'r_scaling': 1.045866271701485	'unroll': 12	'update_epoch': 7	'discount': 0.9185603523761108	'lr': 0.0002828020503346632	'entropy': 0.022792915515982302}. Best is trial 34 with value: 94.75520324707031. [0m
[32m[I 2022-01-15 20:05:23	165] [0m Trial 51 finished with value: 99.71477508544922 and parameters: {'r_scaling': 0.08417223223871466	'unroll': 10	'update_epoch': 1	'discount': 0.9319886688390391	'lr': 0.0003407869869664595	'entropy': 0.0723636350646459}. Best is trial 34 with value: 94.75520324707031. [0m
[32m[I 2022-01-15 20:08:36	688] [0m Trial 52 finished with value: 106.93057250976562 and parameters: {'r_scaling': 0.17041367906068616	'unroll': 8	'update_epoch': 8	'discount': 0.9406190887422804	'lr': 0.0002564606311055267	'entropy': 0.04232351945959277}. Best is trial 34 with value: 94.75520324707031. [0m
[32m[I 2022-01-15 20:11:53	983] [0m Trial 53 finished with value: 105.75727844238281 and parameters: {'r_scaling': 0.10763056230327564	'unroll': 11	'update_epoch': 5	'discount': 0.9118558410018104	'lr': 0.0002933875041309941	'entropy': 0.03336211672075982}. Best is trial 34 with value: 94.75520324707031. [0m
[32m[I 2022-01-15 20:15:09	081] [0m Trial 54 finished with value: 97.08592987060547 and parameters: {'r_scaling': 6.273720898019906	'unroll': 9	'update_epoch': 15	'discount': 0.9285722234055935	'lr': 0.00019142780617577195	'entropy': 0.05498934668224594}. Best is trial 34 with value: 94.75520324707031. [0m
[32m[I 2022-01-15 20:18:27	178] [0m Trial 55 finished with value: 103.66822052001953 and parameters: {'r_scaling': 47.556011371694225	'unroll': 7	'update_epoch': 14	'discount': 0.9196271477628999	'lr': 0.0001518324763588557	'entropy': 0.010556252595614218}. Best is trial 34 with value: 94.75520324707031. [0m
[32m[I 2022-01-15 20:21:47	467] [0m Trial 56 finished with value: 96.96359252929688 and parameters: {'r_scaling': 0.4784128961578384	'unroll': 5	'update_epoch': 13	'discount': 0.9883957501757225	'lr': 0.0003945815800858069	'entropy': 0.07379428701665727}. Best is trial 34 with value: 94.75520324707031. [0m
[32m[I 2022-01-15 20:25:07	257] [0m Trial 57 finished with value: 99.03608703613281 and parameters: {'r_scaling': 0.0543906010302355	'unroll': 10	'update_epoch': 7	'discount': 0.9928878690772805	'lr': 0.00083374960113502	'entropy': 0.004371117143028007}. Best is trial 34 with value: 94.75520324707031. [0m
[32m[I 2022-01-15 20:28:22	673] [0m Trial 58 finished with value: 98.1061782836914 and parameters: {'r_scaling': 0.23093404953465488	'unroll': 11	'update_epoch': 6	'discount': 0.9356764977467575	'lr': 0.0006338490429886539	'entropy': 0.025413293256549247}. Best is trial 34 with value: 94.75520324707031. [0m
[32m[I 2022-01-15 20:31:43	380] [0m Trial 59 finished with value: 101.25164031982422 and parameters: {'r_scaling': 10.299733202295627	'unroll': 6	'update_epoch': 15	'discount': 0.9834734189311592	'lr': 0.00021793723349391848	'entropy': 0.01760799680443572}. Best is trial 34 with value: 94.75520324707031. [0m
[32m[I 2022-01-15 20:34:34	762] [0m Trial 60 finished with value: 101.51742553710938 and parameters: {'r_scaling': 18.61323882743791	'unroll': 7	'update_epoch': 9	'discount': 0.9274307831594437	'lr': 0.00011528645671265873	'entropy': 0.007277841868279087}. Best is trial 34 with value: 94.75520324707031. [0m
[32m[I 2022-01-15 20:37:26	048] [0m Trial 61 finished with value: 107.24789428710938 and parameters: {'r_scaling': 0.6754318238446907	'unroll': 10	'update_epoch': 15	'discount': 0.9737889714038929	'lr': 0.001997285788591159	'entropy': 0.0445081657747767}. Best is trial 34 with value: 94.75520324707031. [0m
[32m[I 2022-01-15 20:40:43	864] [0m Trial 62 finished with value: 106.38127136230469 and parameters: {'r_scaling': 0.3638574669970443	'unroll': 8	'update_epoch': 14	'discount': 0.9699688748388721	'lr': 0.0017486596617350353	'entropy': 0.0334205899800938}. Best is trial 34 with value: 94.75520324707031. [0m
[32m[I 2022-01-15 20:44:01	149] [0m Trial 63 finished with value: 102.30431365966797 and parameters: {'r_scaling': 0.5005766544656316	'unroll': 9	'update_epoch': 15	'discount': 0.9869926307142303	'lr': 0.0014577829354780493	'entropy': 0.0379160466497911}. Best is trial 34 with value: 94.75520324707031. [0m
[32m[I 2022-01-15 20:47:24	975] [0m Trial 64 finished with value: 103.1209945678711 and parameters: {'r_scaling': 0.20107993994663792	'unroll': 12	'update_epoch': 14	'discount': 0.9774883700463142	'lr': 0.0017130448209022907	'entropy': 0.002821930297064161}. Best is trial 34 with value: 94.75520324707031. [0m
[32m[I 2022-01-15 20:50:42	916] [0m Trial 65 finished with value: 96.74372863769531 and parameters: {'r_scaling': 0.1267337902187673	'unroll': 9	'update_epoch': 13	'discount': 0.9922743035663801	'lr': 0.0011892121023365447	'entropy': 0.0701873007810524}. Best is trial 34 with value: 94.75520324707031. [0m
[32m[I 2022-01-15 20:54:01	228] [0m Trial 66 finished with value: 101.48886108398438 and parameters: {'r_scaling': 0.652721219208332	'unroll': 10	'update_epoch': 11	'discount': 0.9807217450056896	'lr': 0.0004899797957733624	'entropy': 0.00015135126706541932}. Best is trial 34 with value: 94.75520324707031. [0m
[32m[I 2022-01-15 20:57:19	996] [0m Trial 67 finished with value: 105.26921081542969 and parameters: {'r_scaling': 2.3974640177098587	'unroll': 7	'update_epoch': 15	'discount': 0.9901047050078147	'lr': 0.0003075394664038955	'entropy': 0.049599951867582336}. Best is trial 34 with value: 94.75520324707031. [0m
[32m[I 2022-01-15 21:00:40	843] [0m Trial 68 finished with value: 100.76750183105469 and parameters: {'r_scaling': 0.27558201037674646	'unroll': 13	'update_epoch': 12	'discount': 0.9595401832932461	'lr': 0.0001759904212470328	'entropy': 0.0056026868082316526}. Best is trial 34 with value: 94.75520324707031. [0m
[32m[I 2022-01-15 21:04:02	565] [0m Trial 69 finished with value: 101.40791320800781 and parameters: {'r_scaling': 197.59510461901522	'unroll': 13	'update_epoch': 14	'discount': 0.9500108526297233	'lr': 0.0013064598865199337	'entropy': 0.02749553331688149}. Best is trial 34 with value: 94.75520324707031. [0m
[32m[I 2022-01-15 21:07:19	298] [0m Trial 70 finished with value: 104.48875427246094 and parameters: {'r_scaling': 0.07193760938257288	'unroll': 4	'update_epoch': 5	'discount': 0.9725295851610806	'lr': 0.00024148619243075252	'entropy': 0.018464350449797353}. Best is trial 34 with value: 94.75520324707031. [0m
[32m[I 2022-01-15 21:10:10	885] [0m Trial 71 finished with value: 99.97325134277344 and parameters: {'r_scaling': 1.3426507610988452	'unroll': 10	'update_epoch': 15	'discount': 0.9688673831925263	'lr': 0.001788217839336889	'entropy': 0.0309242542906748}. Best is trial 34 with value: 94.75520324707031. [0m
[32m[I 2022-01-15 21:13:31	099] [0m Trial 72 finished with value: 101.32573699951172 and parameters: {'r_scaling': 0.7195733903834961	'unroll': 11	'update_epoch': 15	'discount': 0.9621343785849755	'lr': 0.0018453060600473654	'entropy': 0.0613754322241947}. Best is trial 34 with value: 94.75520324707031. [0m
[32m[I 2022-01-15 21:16:43	537] [0m Trial 73 finished with value: 102.77452850341797 and parameters: {'r_scaling': 4.7787379984038525	'unroll': 8	'update_epoch': 15	'discount': 0.981791788207756	'lr': 0.0015547562117112228	'entropy': 0.012302935367074707}. Best is trial 34 with value: 94.75520324707031. [0m
[32m[I 2022-01-15 21:20:11	073] [0m Trial 74 finished with value: 95.86209869384766 and parameters: {'r_scaling': 0.37333400419962876	'unroll': 10	'update_epoch': 13	'discount': 0.9445458400622849	'lr': 0.001595588512189143	'entropy': 0.036340960123109126}. Best is trial 34 with value: 94.75520324707031. [0m
[32m[I 2022-01-15 21:23:28	424] [0m Trial 75 finished with value: 96.32907104492188 and parameters: {'r_scaling': 32.82391302025959	'unroll': 9	'update_epoch': 13	'discount': 0.9416627506389227	'lr': 0.0015573956029098384	'entropy': 0.08009752095344976}. Best is trial 34 with value: 94.75520324707031. [0m
[32m[I 2022-01-15 21:26:48	756] [0m Trial 76 finished with value: 108.5646743774414 and parameters: {'r_scaling': 0.17526989417864075	'unroll': 11	'update_epoch': 14	'discount': 0.9446529971243433	'lr': 0.000449379578499917	'entropy': 0.0009072259342715051}. Best is trial 34 with value: 94.75520324707031. [0m
[32m[I 2022-01-15 21:30:09	506] [0m Trial 77 finished with value: 97.37663269042969 and parameters: {'r_scaling': 0.37497722672182887	'unroll': 6	'update_epoch': 12	'discount': 0.9372699679644128	'lr': 0.00036444520124279687	'entropy': 0.03734844581067166}. Best is trial 34 with value: 94.75520324707031. [0m
[32m[I 2022-01-15 21:33:26	414] [0m Trial 78 finished with value: 106.41976928710938 and parameters: {'r_scaling': 0.2317915881428259	'unroll': 8	'update_epoch': 13	'discount': 0.9309960857681582	'lr': 0.0009471966754296039	'entropy': 0.0003512117249964067}. Best is trial 34 with value: 94.75520324707031. [0m
[32m[I 2022-01-15 21:36:17	653] [0m Trial 79 finished with value: 107.2447280883789 and parameters: {'r_scaling': 0.12054882102254821	'unroll': 7	'update_epoch': 12	'discount': 0.9565572094357808	'lr': 0.0016727135553610663	'entropy': 0.05010008547361749}. Best is trial 34 with value: 94.75520324707031. [0m
[32m[I 2022-01-15 21:39:15	501] [0m Trial 80 finished with value: 102.14264678955078 and parameters: {'r_scaling': 0.5610592688995776	'unroll': 1	'update_epoch': 14	'discount': 0.9245667547383096	'lr': 0.001205423959102032	'entropy': 0.009344011738220874}. Best is trial 34 with value: 94.75520324707031. [0m
[32m[I 2022-01-15 21:42:33	822] [0m Trial 81 finished with value: 112.5068359375 and parameters: {'r_scaling': 105.22300798238976	'unroll': 9	'update_epoch': 13	'discount': 0.9412036117721458	'lr': 0.0014808763174369987	'entropy': 0.08443211607392256}. Best is trial 34 with value: 94.75520324707031. [0m
[32m[I 2022-01-15 21:45:51	730] [0m Trial 82 finished with value: 93.86643981933594 and parameters: {'r_scaling': 71.35974373301605	'unroll': 10	'update_epoch': 13	'discount': 0.9448717836566642	'lr': 0.0019214322403987105	'entropy': 0.0983137913442627}. Best is trial 82 with value: 93.86643981933594. [0m
[32m[I 2022-01-15 21:49:10	564] [0m Trial 83 finished with value: 109.88136291503906 and parameters: {'r_scaling': 68.1445717968672	'unroll': 10	'update_epoch': 11	'discount': 0.9458688917774745	'lr': 0.001985881923219709	'entropy': 0.09621519977249786}. Best is trial 82 with value: 93.86643981933594. [0m
[32m[I 2022-01-15 21:52:29	140] [0m Trial 84 finished with value: 104.24567413330078 and parameters: {'r_scaling': 160.31300700917583	'unroll': 10	'update_epoch': 13	'discount': 0.9477349867101452	'lr': 0.0003231175039605867	'entropy': 0.061796339208017186}. Best is trial 82 with value: 93.86643981933594. [0m
[32m[I 2022-01-15 21:55:45	559] [0m Trial 85 finished with value: 107.01616668701172 and parameters: {'r_scaling': 69.68932690472174	'unroll': 12	'update_epoch': 14	'discount': 0.9343606233969651	'lr': 0.001626886663984916	'entropy': 0.05516793735989241}. Best is trial 82 with value: 93.86643981933594. [0m
[32m[I 2022-01-15 21:59:04	985] [0m Trial 86 finished with value: 96.65618896484375 and parameters: {'r_scaling': 0.3100402006112667	'unroll': 11	'update_epoch': 9	'discount': 0.9507244521777123	'lr': 0.0019231420606095327	'entropy': 0.02641320157604762}. Best is trial 82 with value: 93.86643981933594. [0m
[32m[I 2022-01-15 22:02:19	099] [0m Trial 87 finished with value: 99.95437622070312 and parameters: {'r_scaling': 124.53269296245445	'unroll': 9	'update_epoch': 14	'discount': 0.9848142207845305	'lr': 0.0014258485386768292	'entropy': 0.015163205359178778}. Best is trial 82 with value: 93.86643981933594. [0m
[32m[I 2022-01-15 22:05:34	982] [0m Trial 88 finished with value: 102.22652435302734 and parameters: {'r_scaling': 0.09387644498225657	'unroll': 5	'update_epoch': 6	'discount': 0.9205598795303113	'lr': 0.0004227184457172312	'entropy': 0.045355546281412855}. Best is trial 82 with value: 93.86643981933594. [0m
[32m[I 2022-01-15 22:08:56	528] [0m Trial 89 finished with value: 98.96006774902344 and parameters: {'r_scaling': 0.1560531836986674	'unroll': 7	'update_epoch': 12	'discount': 0.9772595505166903	'lr': 0.00020406875967901838	'entropy': 0.02196399650313027}. Best is trial 82 with value: 93.86643981933594. [0m
[32m[I 2022-01-15 22:12:14	799] [0m Trial 90 finished with value: 105.21566772460938 and parameters: {'r_scaling': 0.8998295734978887	'unroll': 8	'update_epoch': 15	'discount': 0.9140729816237825	'lr': 0.00026636433537956364	'entropy': 0.0016152724119298286}. Best is trial 82 with value: 93.86643981933594. [0m
[32m[I 2022-01-15 22:15:05	990] [0m Trial 91 finished with value: 96.70930480957031 and parameters: {'r_scaling': 36.814570330369236	'unroll': 10	'update_epoch': 13	'discount': 0.9404425431738812	'lr': 0.001300624132449113	'entropy': 0.07965727929941263}. Best is trial 82 with value: 93.86643981933594. [0m
[32m[I 2022-01-15 22:18:31	288] [0m Trial 92 finished with value: 94.56480407714844 and parameters: {'r_scaling': 35.41314639771587	'unroll': 9	'update_epoch': 13	'discount': 0.9443244956124638	'lr': 0.0015548084892035498	'entropy': 0.09965606443835118}. Best is trial 82 with value: 93.86643981933594. [0m
[32m[I 2022-01-15 22:21:46	763] [0m Trial 93 finished with value: 100.75631713867188 and parameters: {'r_scaling': 88.87888970239355	'unroll': 9	'update_epoch': 10	'discount': 0.9433847243912212	'lr': 0.00039143490822248205	'entropy': 0.06405962613775001}. Best is trial 82 with value: 93.86643981933594. [0m
[32m[I 2022-01-15 22:25:02	565] [0m Trial 94 finished with value: 98.8879623413086 and parameters: {'r_scaling': 55.691156919672764	'unroll': 10	'update_epoch': 8	'discount': 0.9387032992342106	'lr': 0.0018664839295331108	'entropy': 0.03673296881994933}. Best is trial 82 with value: 93.86643981933594. [0m
[32m[I 2022-01-15 22:28:18	280] [0m Trial 95 finished with value: 98.65461730957031 and parameters: {'r_scaling': 27.792479490915497	'unroll': 8	'update_epoch': 14	'discount': 0.9547368029285574	'lr': 0.0017209364461730112	'entropy': 0.00010084518677743503}. Best is trial 82 with value: 93.86643981933594. [0m
[32m[I 2022-01-15 22:31:35	907] [0m Trial 96 finished with value: 101.61930847167969 and parameters: {'r_scaling': 14.168074480235655	'unroll': 11	'update_epoch': 15	'discount': 0.987492712734926	'lr': 0.00035402678004910936	'entropy': 0.04321399213526066}. Best is trial 82 with value: 93.86643981933594. [0m
[32m[I 2022-01-15 22:34:52	191] [0m Trial 97 finished with value: 94.33881378173828 and parameters: {'r_scaling': 141.53824292273467	'unroll': 9	'update_epoch': 13	'discount': 0.94866666105316	'lr': 0.0010860088318594035	'entropy': 0.05289378491485885}. Best is trial 82 with value: 93.86643981933594. [0m
[32m[I 2022-01-15 22:38:13	261] [0m Trial 98 finished with value: 101.18203735351562 and parameters: {'r_scaling': 153.81567517366142	'unroll': 9	'update_epoch': 12	'discount': 0.9493400716686462	'lr': 0.0010775935224100063	'entropy': 0.07044978880115083}. Best is trial 82 with value: 93.86643981933594. [0m
[32m[I 2022-01-15 22:41:37	817] [0m Trial 99 finished with value: 98.43638610839844 and parameters: {'r_scaling': 83.74100344850571	'unroll': 6	'update_epoch': 13	'discount': 0.9261433733021393	'lr': 0.0007432173907047541	'entropy': 0.0994136721455418}. Best is trial 82 with value: 93.86643981933594. [0m
[32m[I 2022-01-15 22:44:51	424] [0m Trial 100 finished with value: 97.59446716308594 and parameters: {'r_scaling': 198.85044720515108	'unroll': 7	'update_epoch': 7	'discount': 0.9222935721733442	'lr': 0.0009309221109893875	'entropy': 0.0027918299835831325}. Best is trial 82 with value: 93.86643981933594. [0m
[32m[I 2022-01-15 22:48:09	233] [0m Trial 101 finished with value: 92.89308166503906 and parameters: {'r_scaling': 153.71612246576825	'unroll': 10	'update_epoch': 12	'discount': 0.9052432755220875	'lr': 0.001827638185227367	'entropy': 0.05268270842188163}. Best is trial 101 with value: 92.89308166503906. [0m
[32m[I 2022-01-15 22:51:30	942] [0m Trial 102 finished with value: 96.43431854248047 and parameters: {'r_scaling': 100.21018775944388	'unroll': 10	'update_epoch': 11	'discount': 0.9062041114389621	'lr': 0.0012475887989921866	'entropy': 0.0543727827614998}. Best is trial 101 with value: 92.89308166503906. [0m
[32m[I 2022-01-15 22:54:48	117] [0m Trial 103 finished with value: 106.64446258544922 and parameters: {'r_scaling': 152.86651626221476	'unroll': 8	'update_epoch': 12	'discount': 0.9092210990366714	'lr': 0.0016321890175349809	'entropy': 0.033040328233678855}. Best is trial 101 with value: 92.89308166503906. [0m
[32m[I 2022-01-15 22:58:05	896] [0m Trial 104 finished with value: 98.50969696044922 and parameters: {'r_scaling': 143.34917391412807	'unroll': 9	'update_epoch': 13	'discount': 0.9440667098678852	'lr': 0.0013842522248804924	'entropy': 0.06478068840869221}. Best is trial 101 with value: 92.89308166503906. [0m
[32m[I 2022-01-15 23:00:57	606] [0m Trial 105 finished with value: 95.11107635498047 and parameters: {'r_scaling': 122.92334896012726	'unroll': 10	'update_epoch': 13	'discount': 0.9523456704393608	'lr': 0.000292662848363262	'entropy': 0.08397512308526457}. Best is trial 101 with value: 92.89308166503906. [0m
[32m[I 2022-01-15 23:04:13	997] [0m Trial 106 finished with value: 93.77494812011719 and parameters: {'r_scaling': 68.94653771357028	'unroll': 11	'update_epoch': 13	'discount': 0.9520492834620805	'lr': 0.00029953423331800794	'entropy': 0.08661609017311535}. Best is trial 101 with value: 92.89308166503906. [0m
[32m[I 2022-01-15 23:07:39	771] [0m Trial 107 finished with value: 103.93875122070312 and parameters: {'r_scaling': 69.86834595312142	'unroll': 11	'update_epoch': 12	'discount': 0.9589771878576088	'lr': 0.0003085678550399334	'entropy': 0.08629879093117608}. Best is trial 101 with value: 92.89308166503906. [0m
[32m[I 2022-01-15 23:10:57	588] [0m Trial 108 finished with value: 105.4509048461914 and parameters: {'r_scaling': 50.157609722055426	'unroll': 9	'update_epoch': 13	'discount': 0.9510104444021338	'lr': 0.00028958781757142685	'entropy': 0.09952925350909446}. Best is trial 101 with value: 92.89308166503906. [0m
[32m[I 2022-01-15 23:14:13	007] [0m Trial 109 finished with value: 97.62492370605469 and parameters: {'r_scaling': 114.49590038612719	'unroll': 15	'update_epoch': 12	'discount': 0.9574480146185889	'lr': 0.0002377647251294642	'entropy': 0.07402606730309068}. Best is trial 101 with value: 92.89308166503906. [0m
[32m[I 2022-01-15 23:17:32	810] [0m Trial 110 finished with value: 98.84503936767578 and parameters: {'r_scaling': 171.2201828051319	'unroll': 11	'update_epoch': 13	'discount': 0.9522262933548834	'lr': 0.0002522055215819383	'entropy': 0.006226961897187612}. Best is trial 101 with value: 92.89308166503906. [0m
[32m[I 2022-01-15 23:20:50	186] [0m Trial 111 finished with value: 103.55781555175781 and parameters: {'r_scaling': 131.68515390989663	'unroll': 10	'update_epoch': 13	'discount': 0.9004585162046591	'lr': 0.00027842777117998633	'entropy': 0.08185568840114821}. Best is trial 101 with value: 92.89308166503906. [0m
[32m[I 2022-01-15 23:24:12	375] [0m Trial 112 finished with value: 99.02635955810547 and parameters: {'r_scaling': 42.01069516870091	'unroll': 10	'update_epoch': 14	'discount': 0.9472354042258361	'lr': 0.0003071743153144825	'entropy': 0.0554529187320105}. Best is trial 101 with value: 92.89308166503906. [0m
[32m[I 2022-01-15 23:27:32	365] [0m Trial 113 finished with value: 107.40650939941406 and parameters: {'r_scaling': 60.9275781997747	'unroll': 8	'update_epoch': 12	'discount': 0.9485804024045692	'lr': 0.0003313685799740435	'entropy': 0.049249038596705}. Best is trial 101 with value: 92.89308166503906. [0m
[32m[I 2022-01-15 23:30:48	432] [0m Trial 114 finished with value: 88.7063217163086 and parameters: {'r_scaling': 89.53984228106718	'unroll': 12	'update_epoch': 13	'discount': 0.9036677684755989	'lr': 0.0002264182614239343	'entropy': 0.06872322735672502}. Best is trial 114 with value: 88.7063217163086. [0m
[32m[I 2022-01-15 23:34:18	257] [0m Trial 115 finished with value: 99.92662048339844 and parameters: {'r_scaling': 91.56908518077518	'unroll': 12	'update_epoch': 13	'discount': 0.9054771961520894	'lr': 0.00022359578602275	'entropy': 0.06546018370101843}. Best is trial 114 with value: 88.7063217163086. [0m
[32m[I 2022-01-15 23:37:34	174] [0m Trial 116 finished with value: 105.31979370117188 and parameters: {'r_scaling': 114.70901694310616	'unroll': 11	'update_epoch': 14	'discount': 0.9448887098907872	'lr': 0.0003446012527861097	'entropy': 0.08368210040496019}. Best is trial 114 with value: 88.7063217163086. [0m
[32m[I 2022-01-15 23:40:51	303] [0m Trial 117 finished with value: 100.10033416748047 and parameters: {'r_scaling': 85.13647591360373	'unroll': 13	'update_epoch': 13	'discount': 0.9048374455143373	'lr': 0.001521690892983163	'entropy': 0.07307961711537389}. Best is trial 114 with value: 88.7063217163086. [0m
[32m[I 2022-01-15 23:44:11	020] [0m Trial 118 finished with value: 96.47816467285156 and parameters: {'r_scaling': 76.81063923168658	'unroll': 12	'update_epoch': 14	'discount': 0.9041012781332797	'lr': 0.0002949082401068617	'entropy': 0.004336353832065248}. Best is trial 114 with value: 88.7063217163086. [0m
[32m[I 2022-01-15 23:47:24	975] [0m Trial 119 finished with value: 100.74063110351562 and parameters: {'r_scaling': 177.5409594710362	'unroll': 9	'update_epoch': 11	'discount': 0.9082852110528119	'lr': 0.0008566526313564949	'entropy': 0.05825601521850105}. Best is trial 114 with value: 88.7063217163086. [0m
[32m[I 2022-01-15 23:50:41	368] [0m Trial 120 finished with value: 104.84461975097656 and parameters: {'r_scaling': 106.34467216022828	'unroll': 14	'update_epoch': 13	'discount': 0.9545327149273274	'lr': 0.0002636051670599455	'entropy': 0.08776754597993582}. Best is trial 114 with value: 88.7063217163086. [0m
[32m[I 2022-01-15 23:53:59	715] [0m Trial 121 finished with value: 105.48509979248047 and parameters: {'r_scaling': 125.51695000647892	'unroll': 10	'update_epoch': 12	'discount': 0.9355915067384173	'lr': 0.00018312362122991852	'entropy': 0.041135571099044185}. Best is trial 114 with value: 88.7063217163086. [0m
[32m[I 2022-01-15 23:57:17	192] [0m Trial 122 finished with value: 104.77572631835938 and parameters: {'r_scaling': 8.46772243439573	'unroll': 11	'update_epoch': 13	'discount': 0.9392507522146096	'lr': 0.0002034589712067391	'entropy': 0.047850746022528944}. Best is trial 114 with value: 88.7063217163086. [0m
[32m[I 2022-01-16 00:00:36	869] [0m Trial 123 finished with value: 95.81146240234375 and parameters: {'r_scaling': 58.860532670799685	'unroll': 9	'update_epoch': 14	'discount': 0.9524568964951791	'lr': 0.0002276782654353437	'entropy': 0.07405601729130008}. Best is trial 114 with value: 88.7063217163086. [0m
[32m[I 2022-01-16 00:04:03	578] [0m Trial 124 finished with value: 104.16740417480469 and parameters: {'r_scaling': 59.65246452675431	'unroll': 9	'update_epoch': 14	'discount': 0.9638016345983004	'lr': 0.0003765331147212189	'entropy': 0.07341571972777682}. Best is trial 114 with value: 88.7063217163086. [0m
[32m[I 2022-01-16 00:07:18	721] [0m Trial 125 finished with value: 99.513671875 and parameters: {'r_scaling': 50.45981447848944	'unroll': 7	'update_epoch': 14	'discount': 0.9521173642645074	'lr': 0.0002333176095330767	'entropy': 0.09453909082541953}. Best is trial 114 with value: 88.7063217163086. [0m
[32m[I 2022-01-16 00:10:38	370] [0m Trial 126 finished with value: 99.32396697998047 and parameters: {'r_scaling': 37.72546340548396	'unroll': 8	'update_epoch': 13	'discount': 0.9461302826934325	'lr': 0.0002538356307868063	'entropy': 0.06290245176348899}. Best is trial 114 with value: 88.7063217163086. [0m
[32m[I 2022-01-16 00:13:55	303] [0m Trial 127 finished with value: 102.69700622558594 and parameters: {'r_scaling': 97.46240930181317	'unroll': 7	'update_epoch': 14	'discount': 0.9546663282557613	'lr': 0.0002788713443616949	'entropy': 0.053816371142721725}. Best is trial 114 with value: 88.7063217163086. [0m
[32m[I 2022-01-16 00:17:12	441] [0m Trial 128 finished with value: 103.82689666748047 and parameters: {'r_scaling': 30.05005196459329	'unroll': 9	'update_epoch': 13	'discount': 0.90308777833532	'lr': 0.0018138392431381388	'entropy': 0.0004628854612724537}. Best is trial 114 with value: 88.7063217163086. [0m
[32m[I 2022-01-16 00:20:32	320] [0m Trial 129 finished with value: 108.60651397705078 and parameters: {'r_scaling': 70.93853777351116	'unroll': 10	'update_epoch': 14	'discount': 0.958216481541807	'lr': 0.0005708607670467832	'entropy': 0.0999504860703242}. Best is trial 114 with value: 88.7063217163086. [0m
[32m[I 2022-01-16 00:23:48	656] [0m Trial 130 finished with value: 99.90721130371094 and parameters: {'r_scaling': 22.90070847166922	'unroll': 6	'update_epoch': 12	'discount': 0.9115444953914654	'lr': 0.00032736034304650994	'entropy': 0.07939805828774833}. Best is trial 114 with value: 88.7063217163086. [0m
[32m[I 2022-01-16 00:27:04	132] [0m Trial 131 finished with value: 111.54374694824219 and parameters: {'r_scaling': 136.39428791335808	'unroll': 10	'update_epoch': 13	'discount': 0.9176997883522009	'lr': 0.0002113802391719494	'entropy': 0.00015976948159579762}. Best is trial 114 with value: 88.7063217163086. [0m
[32m[I 2022-01-16 00:29:55	033] [0m Trial 132 finished with value: 102.57530212402344 and parameters: {'r_scaling': 3.150529514909999	'unroll': 11	'update_epoch': 3	'discount': 0.9489125298137594	'lr': 0.0001693277784910387	'entropy': 0.03773530354107921}. Best is trial 114 with value: 88.7063217163086. [0m
[32m[I 2022-01-16 00:32:55	976] [0m Trial 133 finished with value: 109.45531463623047 and parameters: {'r_scaling': 43.87418727190303	'unroll': 10	'update_epoch': 13	'discount': 0.9161334310743151	'lr': 0.00022114950346002282	'entropy': 0.06631437440037768}. Best is trial 114 with value: 88.7063217163086. [0m
[32m[I 2022-01-16 00:36:15	040] [0m Trial 134 finished with value: 98.15889739990234 and parameters: {'r_scaling': 0.2682004581122656	'unroll': 9	'update_epoch': 7	'discount': 0.9430966783861326	'lr': 0.00019190762470749448	'entropy': 0.04776188781614311}. Best is trial 114 with value: 88.7063217163086. [0m
[32m[I 2022-01-16 00:39:34	284] [0m Trial 135 finished with value: 106.79057312011719 and parameters: {'r_scaling': 0.06758574289265694	'unroll': 8	'update_epoch': 14	'discount': 0.9296365428024377	'lr': 0.0010566160573287524	'entropy': 0.057547891632943646}. Best is trial 114 with value: 88.7063217163086. [0m
[32m[I 2022-01-16 00:42:51	260] [0m Trial 136 finished with value: 98.45913696289062 and parameters: {'r_scaling': 59.81120760590375	'unroll': 11	'update_epoch': 15	'discount': 0.933457667239928	'lr': 0.0006865729959281775	'entropy': 0.031193991511720216}. Best is trial 114 with value: 88.7063217163086. [0m
[32m[I 2022-01-16 00:45:41	692] [0m Trial 137 finished with value: 96.60152435302734 and parameters: {'r_scaling': 1.8971473097938163	'unroll': 9	'update_epoch': 13	'discount': 0.9364139559114779	'lr': 0.000459640041340327	'entropy': 0.08420554427779453}. Best is trial 114 with value: 88.7063217163086. [0m
[32m[I 2022-01-16 00:49:00	370] [0m Trial 138 finished with value: 98.43603515625 and parameters: {'r_scaling': 80.72268796151137	'unroll': 10	'update_epoch': 12	'discount': 0.9613308024375475	'lr': 0.00024372753430185903	'entropy': 0.0036585092813824866}. Best is trial 114 with value: 88.7063217163086. [0m
[32m[I 2022-01-16 00:51:50	918] [0m Trial 139 finished with value: 112.52742767333984 and parameters: {'r_scaling': 165.08806454268384	'unroll': 7	'update_epoch': 14	'discount': 0.9465508114101778	'lr': 0.0017402480949546416	'entropy': 0.008978558879199178}. Best is trial 114 with value: 88.7063217163086. [0m
[32m[I 2022-01-16 00:55:07	387] [0m Trial 140 finished with value: 92.92740631103516 and parameters: {'r_scaling': 5.5842584310956465	'unroll': 9	'update_epoch': 13	'discount': 0.9948518595428402	'lr': 0.00026908283098824655	'entropy': 0.07514720962539304}. Best is trial 114 with value: 88.7063217163086. [0m
[32m[I 2022-01-16 00:58:26	415] [0m Trial 141 finished with value: 101.55705261230469 and parameters: {'r_scaling': 6.735782429863221	'unroll': 9	'update_epoch': 13	'discount': 0.9920504711730381	'lr': 0.0002702671034115277	'entropy': 0.07592919345580296}. Best is trial 114 with value: 88.7063217163086. [0m
[32m[I 2022-01-16 01:01:43	085] [0m Trial 142 finished with value: 100.33592224121094 and parameters: {'r_scaling': 10.150857013218099	'unroll': 10	'update_epoch': 13	'discount': 0.9905660572443783	'lr': 0.0003042675068733826	'entropy': 0.06890958199279668}. Best is trial 114 with value: 88.7063217163086. [0m
[32m[I 2022-01-16 01:05:09	336] [0m Trial 143 finished with value: 109.08857727050781 and parameters: {'r_scaling': 4.24803480187359	'unroll': 9	'update_epoch': 12	'discount': 0.9927332809916123	'lr': 0.00023640374754764493	'entropy': 0.051240840013547694}. Best is trial 114 with value: 88.7063217163086. [0m
[32m[I 2022-01-16 01:08:00	887] [0m Trial 144 finished with value: 105.24259185791016 and parameters: {'r_scaling': 5.111368420985826	'unroll': 8	'update_epoch': 13	'discount': 0.9532505898976337	'lr': 0.00025780720189714086	'entropy': 0.04291488922184219}. Best is trial 114 with value: 88.7063217163086. [0m
[32m[I 2022-01-16 01:11:18	001] [0m Trial 145 finished with value: 105.47308349609375 and parameters: {'r_scaling': 2.6358922925591934	'unroll': 6	'update_epoch': 14	'discount': 0.9508892124848161	'lr': 0.0003553883991853139	'entropy': 0.06135246963597145}. Best is trial 114 with value: 88.7063217163086. [0m
[32m[I 2022-01-16 01:14:36	594] [0m Trial 146 finished with value: 96.4661865234375 and parameters: {'r_scaling': 199.09841556004343	'unroll': 12	'update_epoch': 6	'discount': 0.9943485399504622	'lr': 0.0002927379340258328	'entropy': 0.08707519093386056}. Best is trial 114 with value: 88.7063217163086. [0m
[32m[I 2022-01-16 01:17:27	639] [0m Trial 147 finished with value: 104.39414978027344 and parameters: {'r_scaling': 112.71617225725097	'unroll': 8	'update_epoch': 15	'discount': 0.9675508729724659	'lr': 0.0004883505570414329	'entropy': 0.036394920374172794}. Best is trial 114 with value: 88.7063217163086. [0m
[32m[I 2022-01-16 01:20:45	594] [0m Trial 148 finished with value: 106.4567642211914 and parameters: {'r_scaling': 1.096122501987798	'unroll': 10	'update_epoch': 8	'discount': 0.9949942334162998	'lr': 0.001650090511799123	'entropy': 0.024295653896675568}. Best is trial 114 with value: 88.7063217163086. [0m
[32m[I 2022-01-16 01:24:04	706] [0m Trial 149 finished with value: 103.39041900634766 and parameters: {'r_scaling': 93.39263907633097	'unroll': 9	'update_epoch': 12	'discount': 0.9559218397597766	'lr': 0.0002261340842287512	'entropy': 0.06880721561743507}. Best is trial 114 with value: 88.7063217163086. [0m
[32m[I 2022-01-16 01:27:18	345] [0m Trial 150 finished with value: 103.53384399414062 and parameters: {'r_scaling': 145.2517697590732	'unroll': 2	'update_epoch': 13	'discount': 0.9079357961935585	'lr': 0.0003983737909178392	'entropy': 0.00082300779797495}. Best is trial 114 with value: 88.7063217163086. [0m
[32m[I 2022-01-16 01:30:37	407] [0m Trial 151 finished with value: 106.33328247070312 and parameters: {'r_scaling': 0.19661253464293915	'unroll': 10	'update_epoch': 15	'discount': 0.983211994296719	'lr': 0.001989782773427469	'entropy': 0.04528794611145158}. Best is trial 114 with value: 88.7063217163086. [0m
[32m[I 2022-01-16 01:33:51	308] [0m Trial 152 finished with value: 99.77174377441406 and parameters: {'r_scaling': 0.07867383074506132	'unroll': 10	'update_epoch': 15	'discount': 0.9905292337877915	'lr': 0.0018628893302668136	'entropy': 0.019079244344851747}. Best is trial 114 with value: 88.7063217163086. [0m
[32m[I 2022-01-16 01:37:20	737] [0m Trial 153 finished with value: 95.48506164550781 and parameters: {'r_scaling': 0.42404807880356554	'unroll': 11	'update_epoch': 14	'discount': 0.9877513045615943	'lr': 0.0014860371666153888	'entropy': 0.05515522350079502}. Best is trial 114 with value: 88.7063217163086. [0m
[32m[I 2022-01-16 01:40:40	383] [0m Trial 154 finished with value: 99.59103393554688 and parameters: {'r_scaling': 0.3297867079988941	'unroll': 12	'update_epoch': 14	'discount': 0.9430133062789811	'lr': 0.0015401635976499289	'entropy': 0.05635955442412311}. Best is trial 114 with value: 88.7063217163086. [0m
[32m[I 2022-01-16 01:44:00	929] [0m Trial 155 finished with value: 108.56167602539062 and parameters: {'r_scaling': 0.3946557071315104	'unroll': 11	'update_epoch': 13	'discount': 0.9864938890157576	'lr': 0.001411963300613945	'entropy': 0.07644808348053772}. Best is trial 114 with value: 88.7063217163086. [0m
[32m[I 2022-01-16 01:47:16	133] [0m Trial 156 finished with value: 103.10785675048828 and parameters: {'r_scaling': 0.46104623522433075	'unroll': 11	'update_epoch': 14	'discount': 0.9889108830261769	'lr': 0.0013247927726321442	'entropy': 0.09656890051431127}. Best is trial 114 with value: 88.7063217163086. [0m
[32m[I 2022-01-16 01:50:34	202] [0m Trial 157 finished with value: 93.15370178222656 and parameters: {'r_scaling': 124.84206983900248	'unroll': 11	'update_epoch': 13	'discount': 0.9797236065510502	'lr': 0.0014746804967192791	'entropy': 0.06353395703315662}. Best is trial 114 with value: 88.7063217163086. [0m
[32m[I 2022-01-16 01:53:51	925] [0m Trial 158 finished with value: 102.72435760498047 and parameters: {'r_scaling': 132.54579301152853	'unroll': 11	'update_epoch': 13	'discount': 0.978639241497304	'lr': 0.0011578512896053893	'entropy': 0.06355217669094751}. Best is trial 114 with value: 88.7063217163086. [0m
[32m[I 2022-01-16 01:57:09	922] [0m Trial 159 finished with value: 98.27609252929688 and parameters: {'r_scaling': 72.22943151162247	'unroll': 5	'update_epoch': 14	'discount': 0.9825774665916249	'lr': 0.0012331124458412838	'entropy': 0.08820197774697534}. Best is trial 114 with value: 88.7063217163086. [0m
[32m[I 2022-01-16 02:00:28	315] [0m Trial 160 finished with value: 100.64750671386719 and parameters: {'r_scaling': 18.491053706390367	'unroll': 11	'update_epoch': 13	'discount': 0.9755527939028522	'lr': 0.0015959286169776356	'entropy': 0.07444955868044871}. Best is trial 114 with value: 88.7063217163086. [0m
[32m[I 2022-01-16 02:03:48	769] [0m Trial 161 finished with value: 104.69011688232422 and parameters: {'r_scaling': 104.86547913806034	'unroll': 12	'update_epoch': 13	'discount': 0.9803107230918611	'lr': 0.0014668420998720378	'entropy': 0.05260272904615342}. Best is trial 114 with value: 88.7063217163086. [0m
[32m[I 2022-01-16 02:07:06	286] [0m Trial 162 finished with value: 97.8239974975586 and parameters: {'r_scaling': 174.33333180494117	'unroll': 9	'update_epoch': 12	'discount': 0.9858849802482407	'lr': 0.0017321855773461843	'entropy': 0.060435487346821394}. Best is trial 114 with value: 88.7063217163086. [0m
[32m[I 2022-01-16 02:09:58	008] [0m Trial 163 finished with value: 101.43658447265625 and parameters: {'r_scaling': 0.26765070805394	'unroll': 10	'update_epoch': 14	'discount': 0.9484396662738557	'lr': 0.0002743119278449046	'entropy': 0.040305308965626604}. Best is trial 114 with value: 88.7063217163086. [0m
[32m[I 2022-01-16 02:13:16	466] [0m Trial 164 finished with value: 107.71610260009766 and parameters: {'r_scaling': 0.5674078940271768	'unroll': 12	'update_epoch': 13	'discount': 0.9890628639139284	'lr': 0.000318826084226026	'entropy': 0.09959852341953589}. Best is trial 114 with value: 88.7063217163086. [0m
[32m[I 2022-01-16 02:16:48	007] [0m Trial 165 finished with value: 100.58024597167969 and parameters: {'r_scaling': 121.43748314738973	'unroll': 11	'update_epoch': 13	'discount': 0.9007482736094841	'lr': 0.00021167894848611704	'entropy': 0.049168015604039696}. Best is trial 114 with value: 88.7063217163086. [0m
[32m[I 2022-01-16 02:20:04	823] [0m Trial 166 finished with value: 106.72693634033203 and parameters: {'r_scaling': 3.5915985558549712	'unroll': 9	'update_epoch': 12	'discount': 0.944804129225174	'lr': 0.001491420295810706	'entropy': 0.06965005229095361}. Best is trial 114 with value: 88.7063217163086. [0m
[32m[I 2022-01-16 02:23:26	057] [0m Trial 167 finished with value: 96.56243896484375 and parameters: {'r_scaling': 150.6798617891306	'unroll': 10	'update_epoch': 14	'discount': 0.972781822837655	'lr': 0.0005184240898471094	'entropy': 0.001874829888581531}. Best is trial 114 with value: 88.7063217163086. [0m
[32m[I 2022-01-16 02:26:44	385] [0m Trial 168 finished with value: 106.18896484375 and parameters: {'r_scaling': 86.0000658395785	'unroll': 8	'update_epoch': 13	'discount': 0.9407940382854315	'lr': 0.0009720471602291006	'entropy': 0.08414926686500865}. Best is trial 114 with value: 88.7063217163086. [0m
[32m[I 2022-01-16 02:29:59	581] [0m Trial 169 finished with value: 106.54998779296875 and parameters: {'r_scaling': 58.68712008393892	'unroll': 11	'update_epoch': 12	'discount': 0.9842037903520899	'lr': 0.0013756888702842684	'entropy': 0.013038685726388497}. Best is trial 114 with value: 88.7063217163086. [0m
[32m[I 2022-01-16 02:32:50	684] [0m Trial 170 finished with value: 101.8184585571289 and parameters: {'r_scaling': 0.05267895051495269	'unroll': 7	'update_epoch': 13	'discount': 0.9515372631389402	'lr': 0.00019617793593196714	'entropy': 0.011136667307723789}. Best is trial 114 with value: 88.7063217163086. [0m
[32m[I 2022-01-16 02:36:08	670] [0m Trial 171 finished with value: 103.7646713256836 and parameters: {'r_scaling': 0.13297843932944736	'unroll': 10	'update_epoch': 15	'discount': 0.9814063178085298	'lr': 0.0018303463563782818	'entropy': 0.028110316329592284}. Best is trial 114 with value: 88.7063217163086. [0m
[32m[I 2022-01-16 02:39:28	579] [0m Trial 172 finished with value: 106.09455108642578 and parameters: {'r_scaling': 0.11524293204925139	'unroll': 10	'update_epoch': 15	'discount': 0.9783513587630054	'lr': 0.0016695103099455177	'entropy': 0.03411807870879399}. Best is trial 114 with value: 88.7063217163086. [0m
[32m[I 2022-01-16 02:42:46	832] [0m Trial 173 finished with value: 105.30731201171875 and parameters: {'r_scaling': 0.17043858405361906	'unroll': 9	'update_epoch': 14	'discount': 0.9026333614439073	'lr': 0.001909945359932127	'entropy': 0.04330663791922271}. Best is trial 114 with value: 88.7063217163086. [0m
[32m[I 2022-01-16 02:46:09	562] [0m Trial 174 finished with value: 110.15750885009766 and parameters: {'r_scaling': 0.21241365376079396	'unroll': 10	'update_epoch': 15	'discount': 0.9852216268101318	'lr': 0.0016907147684240532	'entropy': 0.05546557590070418}. Best is trial 114 with value: 88.7063217163086. [0m
[32m[I 2022-01-16 02:49:27	450] [0m Trial 175 finished with value: 108.4851303100586 and parameters: {'r_scaling': 0.09067866051248046	'unroll': 11	'update_epoch': 7	'discount': 0.9924050755835966	'lr': 0.0018063209091352971	'entropy': 0.06274104845709738}. Best is trial 114 with value: 88.7063217163086. [0m
[32m[I 2022-01-16 02:52:44	479] [0m Trial 176 finished with value: 101.60504150390625 and parameters: {'r_scaling': 5.8880302175947525	'unroll': 6	'update_epoch': 14	'discount': 0.9877111877511818	'lr': 0.0002467315602226445	'entropy': 0.07832713337164926}. Best is trial 114 with value: 88.7063217163086. [0m
[32m[I 2022-01-16 02:55:48	148] [0m Trial 177 finished with value: 103.50076293945312 and parameters: {'r_scaling': 103.62897492844776	'unroll': 10	'update_epoch': 13	'discount': 0.9469700950374358	'lr': 0.0002799195025706492	'entropy': 0.047009590579462024}. Best is trial 114 with value: 88.7063217163086. [0m
[32m[I 2022-01-16 02:59:05	000] [0m Trial 178 finished with value: 102.13641357421875 and parameters: {'r_scaling': 0.06369837961619323	'unroll': 9	'update_epoch': 15	'discount': 0.9502957084480528	'lr': 0.00160491429285631	'entropy': 0.00020999584903334925}. Best is trial 114 with value: 88.7063217163086. [0m
[32m[I 2022-01-16 03:02:24	439] [0m Trial 179 finished with value: 104.17120361328125 and parameters: {'r_scaling': 129.51320649488267	'unroll': 13	'update_epoch': 13	'discount': 0.9380771394631775	'lr': 0.00018109472855294605	'entropy': 0.07046695098516254}. Best is trial 114 with value: 88.7063217163086. [0m
[32m[I 2022-01-16 03:05:15	262] [0m Trial 180 finished with value: 102.62528991699219 and parameters: {'r_scaling': 76.7629841697731	'unroll': 10	'update_epoch': 14	'discount': 0.9270068054463915	'lr': 0.0008020151527666541	'entropy': 0.04058669231433689}. Best is trial 114 with value: 88.7063217163086. [0m
[32m[I 2022-01-16 03:08:34	359] [0m Trial 181 finished with value: 103.66707611083984 and parameters: {'r_scaling': 0.44963952755552655	'unroll': 10	'update_epoch': 15	'discount': 0.9820294498406111	'lr': 0.0018931762225557307	'entropy': 0.032365493453241675}. Best is trial 114 with value: 88.7063217163086. [0m
[32m[I 2022-01-16 03:11:53	615] [0m Trial 182 finished with value: 103.04085540771484 and parameters: {'r_scaling': 0.7565551114663996	'unroll': 10	'update_epoch': 15	'discount': 0.9766449159144317	'lr': 0.0017810377068541955	'entropy': 0.05229890295606587}. Best is trial 114 with value: 88.7063217163086. [0m
[32m[I 2022-01-16 03:15:10	916] [0m Trial 183 finished with value: 109.63265991210938 and parameters: {'r_scaling': 0.29286242899527737	'unroll': 9	'update_epoch': 15	'discount': 0.9790992372427947	'lr': 0.0019661958437355463	'entropy': 0.037560911439421946}. Best is trial 114 with value: 88.7063217163086. [0m
[32m[I 2022-01-16 03:18:34	020] [0m Trial 184 finished with value: 99.94490814208984 and parameters: {'r_scaling': 0.5103882886434524	'unroll': 11	'update_epoch': 5	'discount': 0.9836494414050709	'lr': 0.0019743213910028835	'entropy': 0.05926164409670311}. Best is trial 114 with value: 88.7063217163086. [0m
[32m[I 2022-01-16 03:21:48	324] [0m Trial 185 finished with value: 102.58888244628906 and parameters: {'r_scaling': 50.89016154646215	'unroll': 10	'update_epoch': 14	'discount': 0.973938935116509	'lr': 0.0015291246352239964	'entropy': 0.002773741148313923}. Best is trial 114 with value: 88.7063217163086. [0m
[32m[I 2022-01-16 03:25:04	341] [0m Trial 186 finished with value: 102.46383666992188 and parameters: {'r_scaling': 0.2528539612831206	'unroll': 8	'update_epoch': 13	'discount': 0.9219246172619757	'lr': 0.0017935458771565081	'entropy': 0.007800080779919913}. Best is trial 114 with value: 88.7063217163086. [0m
[32m[I 2022-01-16 03:28:18	601] [0m Trial 187 finished with value: 106.30970764160156 and parameters: {'r_scaling': 0.38939202468882494	'unroll': 9	'update_epoch': 12	'discount': 0.953254226075206	'lr': 0.0004167581026756315	'entropy': 0.08888084226131403}. Best is trial 114 with value: 88.7063217163086. [0m
[32m[I 2022-01-16 03:31:35	505] [0m Trial 188 finished with value: 102.2703628540039 and parameters: {'r_scaling': 167.2424205030121	'unroll': 10	'update_epoch': 6	'discount': 0.9317007261195828	'lr': 0.0002970590171587482	'entropy': 0.04614857358198551}. Best is trial 114 with value: 88.7063217163086. [0m
[32m[I 2022-01-16 03:34:52	735] [0m Trial 189 finished with value: 98.08900451660156 and parameters: {'r_scaling': 0.5746247541176129	'unroll': 9	'update_epoch': 15	'discount': 0.9144138657554939	'lr': 0.00033534745358004516	'entropy': 0.07797179065772335}. Best is trial 114 with value: 88.7063217163086. [0m
[32m[I 2022-01-16 03:38:24	478] [0m Trial 190 finished with value: 106.17886352539062 and parameters: {'r_scaling': 12.441067986480682	'unroll': 11	'update_epoch': 14	'discount': 0.9702570202396645	'lr': 0.0016900966398754119	'entropy': 0.06800926707586642}. Best is trial 114 with value: 88.7063217163086. [0m
[32m[I 2022-01-16 03:41:41	866] [0m Trial 191 finished with value: 100.1106185913086 and parameters: {'r_scaling': 0.3314336012310409	'unroll': 9	'update_epoch': 13	'discount': 0.9420628228241511	'lr': 0.0015952513766094734	'entropy': 0.08866103601333217}. Best is trial 114 with value: 88.7063217163086. [0m
[32m[I 2022-01-16 03:45:01	083] [0m Trial 192 finished with value: 102.23391723632812 and parameters: {'r_scaling': 35.143871125980894	'unroll': 7	'update_epoch': 13	'discount': 0.948789422767624	'lr': 0.0014943242241290896	'entropy': 0.00496675968452983}. Best is trial 114 with value: 88.7063217163086. [0m
[32m[I 2022-01-16 03:48:21	468] [0m Trial 193 finished with value: 101.18737030029297 and parameters: {'r_scaling': 31.259757342144674	'unroll': 8	'update_epoch': 13	'discount': 0.9452539854256513	'lr': 0.0013341324826989895	'entropy': 0.058962003250053074}. Best is trial 114 with value: 88.7063217163086. [0m
[32m[I 2022-01-16 03:51:41	820] [0m Trial 194 finished with value: 102.50125122070312 and parameters: {'r_scaling': 8.118763729694889	'unroll': 9	'update_epoch': 13	'discount': 0.9396210150893803	'lr': 0.000614084175632592	'entropy': 0.08063255664380316}. Best is trial 114 with value: 88.7063217163086. [0m
[32m[I 2022-01-16 03:54:56	807] [0m Trial 195 finished with value: 102.60346984863281 and parameters: {'r_scaling': 22.11009818357243	'unroll': 9	'update_epoch': 12	'discount': 0.9938372358302381	'lr': 0.0014480014339264516	'entropy': 0.050857709167595466}. Best is trial 114 with value: 88.7063217163086. [0m
[32m[I 2022-01-16 03:58:26	584] [0m Trial 196 finished with value: 104.62367248535156 and parameters: {'r_scaling': 92.1189941813124	'unroll': 10	'update_epoch': 13	'discount': 0.9425124413155581	'lr': 0.0002619393063947345	'entropy': 0.06466936272196577}. Best is trial 114 with value: 88.7063217163086. [0m
[32m[I 2022-01-16 04:01:19	062] [0m Trial 197 finished with value: 106.51653289794922 and parameters: {'r_scaling': 65.44133627594198	'unroll': 10	'update_epoch': 14	'discount': 0.9466490841996172	'lr': 0.0010988499831020755	'entropy': 0.07532729322014795}. Best is trial 114 with value: 88.7063217163086. [0m
[32m[I 2022-01-16 04:05:05	610] [0m Trial 198 finished with value: 103.46721649169922 and parameters: {'r_scaling': 113.84458149593335	'unroll': 5	'update_epoch': 13	'discount': 0.9870419123960025	'lr': 0.0018596767004572837	'entropy': 0.041455574731023216}. Best is trial 114 with value: 88.7063217163086. [0m
[32m[I 2022-01-16 04:08:54	748] [0m Trial 199 finished with value: 101.88016510009766 and parameters: {'r_scaling': 144.5783380388541	'unroll': 9	'update_epoch': 15	'discount': 0.9801576726963432	'lr': 0.00022599574354220705	'entropy': 0.09869976004177061}. Best is trial 114 with value: 88.7063217163086. [0m
