# Supplementary material
Source: ML conference proceedings conference paper supplement (https://proceedings.neurips.cc/paper_files/paper/2022/hash/10a6bdcabbd5a3d36b760daa295f63c1-Abstract.html)
Supplement: Supplementary file 1 [file 10a6bdcabbd5a3d36b760daa295f63c1-Supplemental-Conference.zip › neurips2022/code/robotics_code/hp_searches/halfcheetah_0,625M_less.log]

[32m[I 2022-01-19 16:05:20	940] [0m A new study created in memory with name: no-name-cbbb04a1-4085-4cc6-ac9e-e4f2c1de6061 [0m
[32m[I 2022-01-19 16:08:42	339] [0m Trial 0 finished with value: -336.735595703125 and parameters: {'r_scaling': 0.10030700616857746	'unroll': 7	'update_epoch': 12	'discount': 0.966161906980526	'lr': 0.0006563019861599124	'entropy': 0.0008903691222347194}. Best is trial 0 with value: -336.735595703125. [0m
[32m[I 2022-01-19 16:12:24	523] [0m Trial 1 finished with value: 73.52629089355469 and parameters: {'r_scaling': 0.5176840398081743	'unroll': 1	'update_epoch': 11	'discount': 0.9841618368281709	'lr': 0.001870338819442579	'entropy': 0.001390675222300374}. Best is trial 0 with value: -336.735595703125. [0m
[32m[I 2022-01-19 16:15:55	611] [0m Trial 2 finished with value: -1828.238525390625 and parameters: {'r_scaling': 1.5970424533871217	'unroll': 1	'update_epoch': 15	'discount': 0.9074349544561965	'lr': 0.00016183097046803686	'entropy': 0.000727016109407061}. Best is trial 2 with value: -1828.238525390625. [0m
[32m[I 2022-01-19 16:19:17	501] [0m Trial 3 finished with value: 100.91082763671875 and parameters: {'r_scaling': 0.8424724034055551	'unroll': 13	'update_epoch': 13	'discount': 0.9928079850097538	'lr': 0.00045449749896013416	'entropy': 0.0014036866113363903}. Best is trial 2 with value: -1828.238525390625. [0m
[32m[I 2022-01-19 16:22:54	244] [0m Trial 4 finished with value: -1574.1405029296875 and parameters: {'r_scaling': 143.18113790498126	'unroll': 2	'update_epoch': 4	'discount': 0.9636971359935127	'lr': 0.00010861317507184808	'entropy': 0.00015778975695809747}. Best is trial 2 with value: -1828.238525390625. [0m
[32m[I 2022-01-19 16:26:38	114] [0m Trial 5 finished with value: -687.281005859375 and parameters: {'r_scaling': 17.766378453925167	'unroll': 3	'update_epoch': 7	'discount': 0.9460959309644758	'lr': 0.001873143355990348	'entropy': 0.0008561312360132437}. Best is trial 2 with value: -1828.238525390625. [0m
[32m[I 2022-01-19 16:30:00	974] [0m Trial 6 finished with value: 103.9902572631836 and parameters: {'r_scaling': 31.460614768579287	'unroll': 15	'update_epoch': 1	'discount': 0.9583799619661167	'lr': 0.0005320221847697393	'entropy': 0.0012958550401522624}. Best is trial 2 with value: -1828.238525390625. [0m
[32m[I 2022-01-19 16:33:37	823] [0m Trial 7 finished with value: -1611.219970703125 and parameters: {'r_scaling': 28.807478961511617	'unroll': 5	'update_epoch': 10	'discount': 0.9912858708219632	'lr': 0.00012126082700702531	'entropy': 0.032193310589194994}. Best is trial 2 with value: -1828.238525390625. [0m
[32m[I 2022-01-19 16:36:40	989] [0m Trial 8 finished with value: -1166.267333984375 and parameters: {'r_scaling': 1.9047825100005114	'unroll': 6	'update_epoch': 11	'discount': 0.9123171827927454	'lr': 0.0006685246263286696	'entropy': 0.010997267353891973}. Best is trial 2 with value: -1828.238525390625. [0m
[32m[I 2022-01-19 16:39:58	855] [0m Trial 9 finished with value: 28.278226852416992 and parameters: {'r_scaling': 0.07007678608776327	'unroll': 2	'update_epoch': 11	'discount': 0.9271734044733252	'lr': 0.0003710059700761702	'entropy': 0.019407461992494806}. Best is trial 2 with value: -1828.238525390625. [0m
[32m[I 2022-01-19 16:43:22	972] [0m Trial 10 finished with value: 101.6924819946289 and parameters: {'r_scaling': 6.429282954477636	'unroll': 11	'update_epoch': 15	'discount': 0.9088519844724425	'lr': 0.00020750791510537673	'entropy': 0.00015012613506609854}. Best is trial 2 with value: -1828.238525390625. [0m
[32m[I 2022-01-19 16:46:55	535] [0m Trial 11 finished with value: -1379.89599609375 and parameters: {'r_scaling': 164.4902152137695	'unroll': 4	'update_epoch': 8	'discount': 0.9322092767584796	'lr': 0.00010188741331055731	'entropy': 0.08177886730904124}. Best is trial 2 with value: -1828.238525390625. [0m
[32m[I 2022-01-19 16:50:01	845] [0m Trial 12 finished with value: -1542.674072265625 and parameters: {'r_scaling': 7.28712130015836	'unroll': 5	'update_epoch': 15	'discount': 0.927198863141698	'lr': 0.00018539302832380655	'entropy': 0.010061329345264774}. Best is trial 2 with value: -1828.238525390625. [0m
[32m[I 2022-01-19 16:53:21	267] [0m Trial 13 finished with value: 103.39073944091797 and parameters: {'r_scaling': 40.53867102025527	'unroll': 10	'update_epoch': 5	'discount': 0.9018277413694472	'lr': 0.00019047814483737376	'entropy': 0.07499378954143081}. Best is trial 2 with value: -1828.238525390625. [0m
[32m[I 2022-01-19 16:56:35	789] [0m Trial 14 finished with value: 99.8671646118164 and parameters: {'r_scaling': 0.35530408960419085	'unroll': 9	'update_epoch': 9	'discount': 0.981576169293627	'lr': 0.00028362037052763884	'entropy': 0.004540298026553876}. Best is trial 2 with value: -1828.238525390625. [0m
[32m[I 2022-01-19 17:00:11	358] [0m Trial 15 finished with value: -2514.96484375 and parameters: {'r_scaling': 2.958331623787274	'unroll': 4	'update_epoch': 14	'discount': 0.9424824891974228	'lr': 0.0001422479572252937	'entropy': 0.00039046832906351785}. Best is trial 15 with value: -2514.96484375. [0m
[32m[I 2022-01-19 17:04:20	079] [0m Trial 16 finished with value: -585.4500122070312 and parameters: {'r_scaling': 2.1722655934792945	'unroll': 1	'update_epoch': 14	'discount': 0.9421340779996252	'lr': 0.0010593027645251498	'entropy': 0.0003437709190244433}. Best is trial 15 with value: -2514.96484375. [0m
[32m[I 2022-01-19 17:07:59	878] [0m Trial 17 finished with value: -2252.041259765625 and parameters: {'r_scaling': 5.471903168459306	'unroll': 4	'update_epoch': 13	'discount': 0.9186566320956249	'lr': 0.0002783844708996476	'entropy': 0.000387102162799974}. Best is trial 15 with value: -2514.96484375. [0m
[32m[I 2022-01-19 17:11:41	648] [0m Trial 18 finished with value: -2051.3466796875 and parameters: {'r_scaling': 6.300687593109	'unroll': 7	'update_epoch': 13	'discount': 0.9216477500187014	'lr': 0.0002781578560472617	'entropy': 0.0003405710049563811}. Best is trial 15 with value: -2514.96484375. [0m
[32m[I 2022-01-19 17:15:29	591] [0m Trial 19 finished with value: -2326.38916015625 and parameters: {'r_scaling': 0.2272866155745853	'unroll': 4	'update_epoch': 13	'discount': 0.937792917770316	'lr': 0.00024151826658895016	'entropy': 0.0002807366962316008}. Best is trial 15 with value: -2514.96484375. [0m
[32m[I 2022-01-19 17:18:49	035] [0m Trial 20 finished with value: 99.443359375 and parameters: {'r_scaling': 0.19220809923577092	'unroll': 8	'update_epoch': 6	'discount': 0.9375207597730586	'lr': 0.00014274480146064504	'entropy': 0.003410721841518442}. Best is trial 15 with value: -2514.96484375. [0m
[32m[I 2022-01-19 17:22:28	706] [0m Trial 21 finished with value: -2074.5732421875 and parameters: {'r_scaling': 0.9942119556088906	'unroll': 4	'update_epoch': 13	'discount': 0.954155373259046	'lr': 0.00026983040956427186	'entropy': 0.00031710386321009916}. Best is trial 15 with value: -2514.96484375. [0m
[32m[I 2022-01-19 17:26:16	539] [0m Trial 22 finished with value: -1921.7578125 and parameters: {'r_scaling': 4.337023464520587	'unroll': 4	'update_epoch': 13	'discount': 0.9519495898845635	'lr': 0.00023691442266888485	'entropy': 0.00010880145677420021}. Best is trial 15 with value: -2514.96484375. [0m
[32m[I 2022-01-19 17:29:56	216] [0m Trial 23 finished with value: -1620.48876953125 and parameters: {'r_scaling': 14.242072998470116	'unroll': 6	'update_epoch': 10	'discount': 0.9194697002528426	'lr': 0.0003813736701240899	'entropy': 0.0004888329195511741}. Best is trial 15 with value: -2514.96484375. [0m
[32m[I 2022-01-19 17:33:10	986] [0m Trial 24 finished with value: -2889.2060546875 and parameters: {'r_scaling': 0.2187161052300919	'unroll': 3	'update_epoch': 14	'discount': 0.9354837398981222	'lr': 0.00014297165438125094	'entropy': 0.00022120216979698882}. Best is trial 24 with value: -2889.2060546875. [0m
[32m[I 2022-01-19 17:36:59	054] [0m Trial 25 finished with value: -2497.925537109375 and parameters: {'r_scaling': 0.18325473062769285	'unroll': 3	'update_epoch': 14	'discount': 0.9382479111647898	'lr': 0.0001439601550938153	'entropy': 0.0001836971495723621}. Best is trial 24 with value: -2889.2060546875. [0m
[32m[I 2022-01-19 17:40:52	062] [0m Trial 26 finished with value: 9.77291488647461 and parameters: {'r_scaling': 0.05281080019511139	'unroll': 2	'update_epoch': 15	'discount': 0.9486488298778498	'lr': 0.00014070233984828724	'entropy': 0.00021594112958023612}. Best is trial 24 with value: -2889.2060546875. [0m
[32m[I 2022-01-19 17:44:39	274] [0m Trial 27 finished with value: -1869.216064453125 and parameters: {'r_scaling': 0.13050182154706674	'unroll': 3	'update_epoch': 14	'discount': 0.933201557221447	'lr': 0.000127517291671857	'entropy': 0.00010223380951974931}. Best is trial 24 with value: -2889.2060546875. [0m
[32m[I 2022-01-19 17:48:15	958] [0m Trial 28 finished with value: -1515.8837890625 and parameters: {'r_scaling': 0.3950917731066313	'unroll': 6	'update_epoch': 2	'discount': 0.9424812294168695	'lr': 0.00016144287407764016	'entropy': 0.00016925688287699114}. Best is trial 24 with value: -2889.2060546875. [0m
[32m[I 2022-01-19 17:52:02	673] [0m Trial 29 finished with value: -394.46075439453125 and parameters: {'r_scaling': 0.1380757772217616	'unroll': 7	'update_epoch': 12	'discount': 0.9650137715846697	'lr': 0.0008235379604083734	'entropy': 0.0006283410357121162}. Best is trial 24 with value: -2889.2060546875. [0m
[32m[I 2022-01-19 17:55:49	299] [0m Trial 30 finished with value: -2624.41796875 and parameters: {'r_scaling': 0.7833764090263029	'unroll': 3	'update_epoch': 12	'discount': 0.9583914471774031	'lr': 0.00016392003568537551	'entropy': 0.0025610704675930163}. Best is trial 24 with value: -2889.2060546875. [0m
[32m[I 2022-01-19 17:59:07	011] [0m Trial 31 finished with value: -2609.5869140625 and parameters: {'r_scaling': 0.9125208943915502	'unroll': 3	'update_epoch': 14	'discount': 0.9683477545703121	'lr': 0.00016198693904683314	'entropy': 0.002142579378503692}. Best is trial 24 with value: -2889.2060546875. [0m
[32m[I 2022-01-19 18:02:56	046] [0m Trial 32 finished with value: -3556.81201171875 and parameters: {'r_scaling': 0.7475952737937522	'unroll': 2	'update_epoch': 12	'discount': 0.9758821726460396	'lr': 0.00016748682872968004	'entropy': 0.0018296286695374169}. Best is trial 32 with value: -3556.81201171875. [0m
[32m[I 2022-01-19 18:06:58	345] [0m Trial 33 finished with value: -1046.7850341796875 and parameters: {'r_scaling': 0.7749070393687344	'unroll': 1	'update_epoch': 12	'discount': 0.9701727877821045	'lr': 0.00017272360790633167	'entropy': 0.002200810491971605}. Best is trial 32 with value: -3556.81201171875. [0m
[32m[I 2022-01-19 18:10:47	346] [0m Trial 34 finished with value: -548.6826171875 and parameters: {'r_scaling': 0.5010604316459752	'unroll': 2	'update_epoch': 12	'discount': 0.9751661317120651	'lr': 0.00021776268176289972	'entropy': 0.006304493500609975}. Best is trial 32 with value: -3556.81201171875. [0m
[32m[I 2022-01-19 18:14:44	645] [0m Trial 35 finished with value: -377.4176330566406 and parameters: {'r_scaling': 1.2060562333453122	'unroll': 1	'update_epoch': 10	'discount': 0.9801809772081533	'lr': 0.00032971034815423253	'entropy': 0.001838731109838068}. Best is trial 32 with value: -3556.81201171875. [0m
[32m[I 2022-01-19 18:18:31	231] [0m Trial 36 finished with value: 113.2030029296875 and parameters: {'r_scaling': 0.7055271313533157	'unroll': 3	'update_epoch': 11	'discount': 0.9721548443345757	'lr': 0.0014050048797769636	'entropy': 0.002753820946289536}. Best is trial 32 with value: -3556.81201171875. [0m
[32m[I 2022-01-19 18:22:10	748] [0m Trial 37 finished with value: -2003.8067626953125 and parameters: {'r_scaling': 0.3287511922225434	'unroll': 5	'update_epoch': 9	'discount': 0.9593217737181546	'lr': 0.00011790474085113089	'entropy': 0.0011635296327769328}. Best is trial 32 with value: -3556.81201171875. [0m
[32m[I 2022-01-19 18:26:01	902] [0m Trial 38 finished with value: -978.0499877929688 and parameters: {'r_scaling': 1.3730533538287297	'unroll': 2	'update_epoch': 15	'discount': 0.9865620795839021	'lr': 0.00016112660843497565	'entropy': 0.005253475064903101}. Best is trial 32 with value: -3556.81201171875. [0m
[32m[I 2022-01-19 18:29:18	476] [0m Trial 39 finished with value: -2568.80078125 and parameters: {'r_scaling': 0.5819474834702774	'unroll': 3	'update_epoch': 11	'discount': 0.9598572579893299	'lr': 0.00010722068284884021	'entropy': 0.0009816977356779096}. Best is trial 32 with value: -3556.81201171875. [0m
[32m[I 2022-01-19 18:32:37	777] [0m Trial 40 finished with value: 105.66963195800781 and parameters: {'r_scaling': 0.08574444469819727	'unroll': 12	'update_epoch': 14	'discount': 0.9763946900719069	'lr': 0.00018214135153122286	'entropy': 0.001855167521655573}. Best is trial 32 with value: -3556.81201171875. [0m
[32m[I 2022-01-19 18:36:20	619] [0m Trial 41 finished with value: -3075.71240234375 and parameters: {'r_scaling': 0.6055523716125971	'unroll': 3	'update_epoch': 11	'discount': 0.9586960763375078	'lr': 0.0001009982730800063	'entropy': 0.0010553626345733162}. Best is trial 32 with value: -3556.81201171875. [0m
[32m[I 2022-01-19 18:39:45	429] [0m Trial 42 finished with value: -669.046142578125 and parameters: {'r_scaling': 0.3171423301585193	'unroll': 1	'update_epoch': 12	'discount': 0.967190387391537	'lr': 0.00012268073692957206	'entropy': 0.0007455405834278448}. Best is trial 32 with value: -3556.81201171875. [0m
[32m[I 2022-01-19 18:43:29	686] [0m Trial 43 finished with value: -1129.256591796875 and parameters: {'r_scaling': 2.177454259531966	'unroll': 2	'update_epoch': 12	'discount': 0.9542460859987681	'lr': 0.00010869845265522427	'entropy': 0.0028607860686086545}. Best is trial 32 with value: -3556.81201171875. [0m
[32m[I 2022-01-19 18:46:48	875] [0m Trial 44 finished with value: 99.78128051757812 and parameters: {'r_scaling': 1.0691152546301559	'unroll': 15	'update_epoch': 9	'discount': 0.9619299361303679	'lr': 0.00010031404389214318	'entropy': 0.0016560369408972562}. Best is trial 32 with value: -3556.81201171875. [0m
[32m[I 2022-01-19 18:50:24	910] [0m Trial 45 finished with value: -2281.9990234375 and parameters: {'r_scaling': 0.535711364598962	'unroll': 5	'update_epoch': 10	'discount': 0.9681808720306359	'lr': 0.0002148216290301582	'entropy': 0.008248341231299059}. Best is trial 32 with value: -3556.81201171875. [0m
[32m[I 2022-01-19 18:54:12	838] [0m Trial 46 finished with value: -661.9390869140625 and parameters: {'r_scaling': 0.2540639673901387	'unroll': 3	'update_epoch': 11	'discount': 0.9939652616383172	'lr': 0.00015499149498575748	'entropy': 0.003857301771696115}. Best is trial 32 with value: -3556.81201171875. [0m
[32m[I 2022-01-19 18:57:39	012] [0m Trial 47 finished with value: 105.47933959960938 and parameters: {'r_scaling': 3.0707687417132536	'unroll': 14	'update_epoch': 8	'discount': 0.9862407150447349	'lr': 0.00012664959740637144	'entropy': 0.0013200652605927115}. Best is trial 32 with value: -3556.81201171875. [0m
[32m[I 2022-01-19 19:01:14	424] [0m Trial 48 finished with value: -2478.144287109375 and parameters: {'r_scaling': 1.6153988550008767	'unroll': 5	'update_epoch': 14	'discount': 0.9760567500911811	'lr': 0.00019644628328916754	'entropy': 0.002356882194644451}. Best is trial 32 with value: -3556.81201171875. [0m
[32m[I 2022-01-19 19:04:26	442] [0m Trial 49 finished with value: -93.22474670410156 and parameters: {'r_scaling': 0.7907478891721865	'unroll': 2	'update_epoch': 13	'discount': 0.9494098848138371	'lr': 0.0005703181992354795	'entropy': 0.016095218548678167}. Best is trial 32 with value: -3556.81201171875. [0m
[32m[I 2022-01-19 19:08:13	463] [0m Trial 50 finished with value: -1709.00927734375 and parameters: {'r_scaling': 104.77751765322644	'unroll': 6	'update_epoch': 15	'discount': 0.9566817227794818	'lr': 0.00045731019494661196	'entropy': 0.0005396886953940494}. Best is trial 32 with value: -3556.81201171875. [0m
[32m[I 2022-01-19 19:12:00	113] [0m Trial 51 finished with value: -3001.19091796875 and parameters: {'r_scaling': 0.5031595476465871	'unroll': 3	'update_epoch': 11	'discount': 0.9617729188797229	'lr': 0.0001126671590537381	'entropy': 0.000940383721199014}. Best is trial 32 with value: -3556.81201171875. [0m
[32m[I 2022-01-19 19:15:43	531] [0m Trial 52 finished with value: -2873.32666015625 and parameters: {'r_scaling': 0.4840445339993199	'unroll': 3	'update_epoch': 10	'discount': 0.9644383457757839	'lr': 0.00011524992456512706	'entropy': 0.0008144169364347877}. Best is trial 32 with value: -3556.81201171875. [0m
[32m[I 2022-01-19 19:19:32	501] [0m Trial 53 finished with value: -1757.0908203125 and parameters: {'r_scaling': 0.43344013546891763	'unroll': 2	'update_epoch': 10	'discount': 0.9625312015828315	'lr': 0.00011457523673785479	'entropy': 0.0008766236800403444}. Best is trial 32 with value: -3556.81201171875. [0m
[32m[I 2022-01-19 19:23:15	970] [0m Trial 54 finished with value: -2421.868408203125 and parameters: {'r_scaling': 0.1371841217845892	'unroll': 4	'update_epoch': 9	'discount': 0.9464554481955697	'lr': 0.00010005729656930233	'entropy': 0.0010207289930695565}. Best is trial 32 with value: -3556.81201171875. [0m
[32m[I 2022-01-19 19:27:10	110] [0m Trial 55 finished with value: -1799.644775390625 and parameters: {'r_scaling': 0.28526007784428825	'unroll': 1	'update_epoch': 7	'discount': 0.9565175608200157	'lr': 0.00013541072185599835	'entropy': 0.0015706276179766}. Best is trial 32 with value: -3556.81201171875. [0m
[32m[I 2022-01-19 19:30:19	560] [0m Trial 56 finished with value: -2624.1357421875 and parameters: {'r_scaling': 0.6456550050293792	'unroll': 4	'update_epoch': 11	'discount': 0.9721397595072879	'lr': 0.00012097337472136292	'entropy': 0.0006831692626139477}. Best is trial 32 with value: -3556.81201171875. [0m
[32m[I 2022-01-19 19:34:08	785] [0m Trial 57 finished with value: -2505.78515625 and parameters: {'r_scaling': 0.17352952392905321	'unroll': 3	'update_epoch': 12	'discount': 0.9648264049791635	'lr': 0.00013317496852966178	'entropy': 0.0004891761455572294}. Best is trial 32 with value: -3556.81201171875. [0m
[32m[I 2022-01-19 19:37:54	448] [0m Trial 58 finished with value: -1708.7410888671875 and parameters: {'r_scaling': 0.44803331143495795	'unroll': 5	'update_epoch': 10	'discount': 0.9507495485659164	'lr': 0.00015039687703682225	'entropy': 0.00025800263963452185}. Best is trial 32 with value: -3556.81201171875. [0m
[32m[I 2022-01-19 19:41:45	775] [0m Trial 59 finished with value: -1172.810791015625 and parameters: {'r_scaling': 2.0732910468332677	'unroll': 2	'update_epoch': 11	'discount': 0.9267364828561245	'lr': 0.00011008239304600896	'entropy': 0.0012273375766752915}. Best is trial 32 with value: -3556.81201171875. [0m
[32m[I 2022-01-19 19:45:09	618] [0m Trial 60 finished with value: 102.544921875 and parameters: {'r_scaling': 0.261224380211785	'unroll': 8	'update_epoch': 8	'discount': 0.9453359070771225	'lr': 0.00017534246787055547	'entropy': 0.0007979675051339208}. Best is trial 32 with value: -3556.81201171875. [0m
[32m[I 2022-01-19 19:48:48	870] [0m Trial 61 finished with value: -2639.279296875 and parameters: {'r_scaling': 0.6657818850207627	'unroll': 4	'update_epoch': 11	'discount': 0.9717255899725518	'lr': 0.00012142502995433228	'entropy': 0.0006519024740831378}. Best is trial 32 with value: -3556.81201171875. [0m
[32m[I 2022-01-19 19:52:27	758] [0m Trial 62 finished with value: -2210.2861328125 and parameters: {'r_scaling': 0.3915782477028941	'unroll': 3	'update_epoch': 10	'discount': 0.97999695540957	'lr': 0.00012778609476680794	'entropy': 0.00044429507787390127}. Best is trial 32 with value: -3556.81201171875. [0m
[32m[I 2022-01-19 19:55:42	276] [0m Trial 63 finished with value: -2492.80712890625 and parameters: {'r_scaling': 1.1296050057475244	'unroll': 4	'update_epoch': 12	'discount': 0.9613027454189956	'lr': 0.00011496770491213772	'entropy': 0.0006387702930807696}. Best is trial 32 with value: -3556.81201171875. [0m
[32m[I 2022-01-19 19:59:25	557] [0m Trial 64 finished with value: -2534.59814453125 and parameters: {'r_scaling': 0.6344532061427504	'unroll': 3	'update_epoch': 11	'discount': 0.97273781927447	'lr': 0.0001444586702430916	'entropy': 0.0009946139917859026}. Best is trial 32 with value: -3556.81201171875. [0m
[32m[I 2022-01-19 20:03:12	855] [0m Trial 65 finished with value: -620.4495849609375 and parameters: {'r_scaling': 1.4794624390759443	'unroll': 2	'update_epoch': 9	'discount': 0.9658314535365126	'lr': 0.00016994374507171392	'entropy': 0.003730036288438508}. Best is trial 32 with value: -3556.81201171875. [0m
[32m[I 2022-01-19 20:07:14	337] [0m Trial 66 finished with value: 58.546714782714844 and parameters: {'r_scaling': 0.20889546087074976	'unroll': 1	'update_epoch': 13	'discount': 0.9564081809589927	'lr': 0.00020089477031135883	'entropy': 0.0002394334985829212}. Best is trial 32 with value: -3556.81201171875. [0m
[32m[I 2022-01-19 20:10:58	538] [0m Trial 67 finished with value: -791.67431640625 and parameters: {'r_scaling': 0.10141066261048753	'unroll': 3	'update_epoch': 11	'discount': 0.9898023497076086	'lr': 0.00013387920935195634	'entropy': 0.0001374551958675986}. Best is trial 32 with value: -3556.81201171875. [0m
[32m[I 2022-01-19 20:14:28	830] [0m Trial 68 finished with value: 101.0904541015625 and parameters: {'r_scaling': 0.8582714754606154	'unroll': 9	'update_epoch': 13	'discount': 0.9530200485066793	'lr': 0.0002339863207483125	'entropy': 0.001307143052809135}. Best is trial 32 with value: -3556.81201171875. [0m
[32m[I 2022-01-19 20:18:09	063] [0m Trial 69 finished with value: -2659.09326171875 and parameters: {'r_scaling': 0.505212773930193	'unroll': 4	'update_epoch': 12	'discount': 0.9695980327140133	'lr': 0.00010826474756437537	'entropy': 0.0015267140874024436}. Best is trial 32 with value: -3556.81201171875. [0m
[32m[I 2022-01-19 20:21:51	083] [0m Trial 70 finished with value: -2499.8359375 and parameters: {'r_scaling': 0.3503611862094552	'unroll': 4	'update_epoch': 11	'discount': 0.9697871539205674	'lr': 0.00010803662234862177	'entropy': 0.0005780350752618618}. Best is trial 32 with value: -3556.81201171875. [0m
[32m[I 2022-01-19 20:25:32	304] [0m Trial 71 finished with value: -2626.42041015625 and parameters: {'r_scaling': 0.5213760154223136	'unroll': 4	'update_epoch': 12	'discount': 0.976676335917414	'lr': 0.00011731162835843785	'entropy': 0.0020520099179721714}. Best is trial 32 with value: -3556.81201171875. [0m
[32m[I 2022-01-19 20:29:17	914] [0m Trial 72 finished with value: -1684.478271484375 and parameters: {'r_scaling': 0.438260539204245	'unroll': 5	'update_epoch': 12	'discount': 0.9827855493739303	'lr': 0.00012027181565417728	'entropy': 0.001455732449653398}. Best is trial 32 with value: -3556.81201171875. [0m
[32m[I 2022-01-19 20:32:58	448] [0m Trial 73 finished with value: -2828.19287109375 and parameters: {'r_scaling': 0.48246076259909654	'unroll': 4	'update_epoch': 13	'discount': 0.9808206690459197	'lr': 0.00010646924446405736	'entropy': 0.0019421635065305248}. Best is trial 32 with value: -3556.81201171875. [0m
[32m[I 2022-01-19 20:36:14	927] [0m Trial 74 finished with value: -2015.650634765625 and parameters: {'r_scaling': 0.16443895036008946	'unroll': 6	'update_epoch': 13	'discount': 0.9729009036513642	'lr': 0.00010085432236270755	'entropy': 0.00040160532688155603}. Best is trial 32 with value: -3556.81201171875. [0m
[32m[I 2022-01-19 20:39:55	440] [0m Trial 75 finished with value: -2297.67919921875 and parameters: {'r_scaling': 9.219921909935538	'unroll': 4	'update_epoch': 13	'discount': 0.9800366858150019	'lr': 0.00014700498837051995	'entropy': 0.0011023622854229248}. Best is trial 32 with value: -3556.81201171875. [0m
[32m[I 2022-01-19 20:43:45	871] [0m Trial 76 finished with value: -1242.0419921875 and parameters: {'r_scaling': 0.26032019266936623	'unroll': 2	'update_epoch': 10	'discount': 0.9330354562451697	'lr': 0.00013048693287750316	'entropy': 0.0007988270947170451}. Best is trial 32 with value: -3556.81201171875. [0m
[32m[I 2022-01-19 20:47:30	169] [0m Trial 77 finished with value: -2756.10205078125 and parameters: {'r_scaling': 0.610197162677648	'unroll': 3	'update_epoch': 7	'discount': 0.9782907069689293	'lr': 0.00010867291855539443	'entropy': 0.001641601515126329}. Best is trial 32 with value: -3556.81201171875. [0m
[32m[I 2022-01-19 20:50:40	788] [0m Trial 78 finished with value: -2785.520263671875 and parameters: {'r_scaling': 0.9866166553829276	'unroll': 3	'update_epoch': 7	'discount': 0.9892065691130777	'lr': 0.00010427346719458317	'entropy': 0.0033349181246945473}. Best is trial 32 with value: -3556.81201171875. [0m
[32m[I 2022-01-19 20:54:23	778] [0m Trial 79 finished with value: 122.5006103515625 and parameters: {'r_scaling': 0.9795722313107807	'unroll': 2	'update_epoch': 7	'discount': 0.9805151118535528	'lr': 0.0008343050248673375	'entropy': 0.005273851190943683}. Best is trial 32 with value: -3556.81201171875. [0m
[32m[I 2022-01-19 20:57:48	360] [0m Trial 80 finished with value: -1278.22802734375 and parameters: {'r_scaling': 0.3743439075828807	'unroll': 1	'update_epoch': 6	'discount': 0.9910017265432978	'lr': 0.00010983205644220825	'entropy': 0.0033400981096925004}. Best is trial 32 with value: -3556.81201171875. [0m
[32m[I 2022-01-19 21:00:58	836] [0m Trial 81 finished with value: -3367.9541015625 and parameters: {'r_scaling': 0.5297082346519294	'unroll': 3	'update_epoch': 6	'discount': 0.9855057434029265	'lr': 0.00010694390365819848	'entropy': 0.0018303174577433078}. Best is trial 32 with value: -3556.81201171875. [0m
[32m[I 2022-01-19 21:04:38	296] [0m Trial 82 finished with value: -2782.02587890625 and parameters: {'r_scaling': 1.2574551129875944	'unroll': 3	'update_epoch': 5	'discount': 0.9856232290962365	'lr': 0.0001008087067880823	'entropy': 0.0031319220432309823}. Best is trial 32 with value: -3556.81201171875. [0m
[32m[I 2022-01-19 21:08:15	640] [0m Trial 83 finished with value: -2872.814453125 and parameters: {'r_scaling': 1.7645886336389118	'unroll': 3	'update_epoch': 5	'discount': 0.9883914431183878	'lr': 0.00010086205638298816	'entropy': 0.004560126220913597}. Best is trial 32 with value: -3556.81201171875. [0m
[32m[I 2022-01-19 21:11:54	855] [0m Trial 84 finished with value: -1880.0234375 and parameters: {'r_scaling': 1.6493867646973408	'unroll': 2	'update_epoch': 3	'discount': 0.9882883301966916	'lr': 0.00013536137466904679	'entropy': 0.004537443698577011}. Best is trial 32 with value: -3556.81201171875. [0m
[32m[I 2022-01-19 21:15:35	858] [0m Trial 85 finished with value: -2031.96826171875 and parameters: {'r_scaling': 2.5580057285335593	'unroll': 3	'update_epoch': 6	'discount': 0.9838722001145211	'lr': 0.0001529977649009851	'entropy': 0.007304351033824693}. Best is trial 32 with value: -3556.81201171875. [0m
[32m[I 2022-01-19 21:19:21	435] [0m Trial 86 finished with value: -2751.4619140625 and parameters: {'r_scaling': 4.216933325285144	'unroll': 3	'update_epoch': 4	'discount': 0.993185827136093	'lr': 0.00011882200588656345	'entropy': 0.0023812560185628765}. Best is trial 32 with value: -3556.81201171875. [0m
[32m[I 2022-01-19 21:23:02	400] [0m Trial 87 finished with value: -1996.3663330078125 and parameters: {'r_scaling': 0.9076480230121309	'unroll': 2	'update_epoch': 5	'discount': 0.9844506870999883	'lr': 0.00012681706045842108	'entropy': 0.004289209327610906}. Best is trial 32 with value: -3556.81201171875. [0m
[32m[I 2022-01-19 21:26:46	245] [0m Trial 88 finished with value: -2854.07470703125 and parameters: {'r_scaling': 1.8451028822661337	'unroll': 3	'update_epoch': 6	'discount': 0.9908194247810584	'lr': 0.00010525263531753858	'entropy': 0.012250586268145193}. Best is trial 32 with value: -3556.81201171875. [0m
[32m[I 2022-01-19 21:30:24	529] [0m Trial 89 finished with value: -427.501953125 and parameters: {'r_scaling': 1.852523779196756	'unroll': 5	'update_epoch': 5	'discount': 0.9878193041467686	'lr': 0.0015873789854279053	'entropy': 0.05396171567320653}. Best is trial 32 with value: -3556.81201171875. [0m
[32m[I 2022-01-19 21:33:34	860] [0m Trial 90 finished with value: -2340.30078125 and parameters: {'r_scaling': 0.3058868841047203	'unroll': 2	'update_epoch': 4	'discount': 0.9821613628603945	'lr': 0.00014003077352531197	'entropy': 0.01727650985295493}. Best is trial 32 with value: -3556.81201171875. [0m
[32m[I 2022-01-19 21:36:45	623] [0m Trial 91 finished with value: -2523.714599609375 and parameters: {'r_scaling': 1.2877427972894078	'unroll': 3	'update_epoch': 7	'discount': 0.9946115780546402	'lr': 0.00011239519697829188	'entropy': 0.02649376552182439}. Best is trial 32 with value: -3556.81201171875. [0m
[32m[I 2022-01-19 21:40:26	244] [0m Trial 92 finished with value: -2622.375 and parameters: {'r_scaling': 0.7663506440372991	'unroll': 3	'update_epoch': 6	'discount': 0.9912596309867857	'lr': 0.00010347663196821834	'entropy': 0.001946988865480191}. Best is trial 32 with value: -3556.81201171875. [0m
[32m[I 2022-01-19 21:44:15	157] [0m Trial 93 finished with value: -1835.954345703125 and parameters: {'r_scaling': 0.9608750058912023	'unroll': 4	'update_epoch': 6	'discount': 0.9915621273303746	'lr': 0.00011447522545497807	'entropy': 0.002816114741375357}. Best is trial 32 with value: -3556.81201171875. [0m
[32m[I 2022-01-19 21:48:02	546] [0m Trial 94 finished with value: -772.996826171875 and parameters: {'r_scaling': 2.349435862975917	'unroll': 1	'update_epoch': 5	'discount': 0.9888995573427608	'lr': 0.00012687661031672698	'entropy': 0.011973899553619981}. Best is trial 32 with value: -3556.81201171875. [0m
[32m[I 2022-01-19 21:51:42	517] [0m Trial 95 finished with value: -2895.39990234375 and parameters: {'r_scaling': 1.6931914181551	'unroll': 3	'update_epoch': 6	'discount': 0.9868936317222294	'lr': 0.0001001929699518788	'entropy': 0.01062646874954678}. Best is trial 32 with value: -3556.81201171875. [0m
[32m[I 2022-01-19 21:55:20	631] [0m Trial 96 finished with value: -1593.096923828125 and parameters: {'r_scaling': 3.242395772875403	'unroll': 2	'update_epoch': 3	'discount': 0.9782317056826837	'lr': 0.00010012362923576603	'entropy': 0.013609426460029718}. Best is trial 32 with value: -3556.81201171875. [0m
[32m[I 2022-01-19 21:58:34	055] [0m Trial 97 finished with value: -1769.2418212890625 and parameters: {'r_scaling': 4.523192980008597	'unroll': 2	'update_epoch': 8	'discount': 0.985701535628977	'lr': 0.00012185575623951967	'entropy': 0.02919700502396597}. Best is trial 32 with value: -3556.81201171875. [0m
[32m[I 2022-01-19 22:02:12	496] [0m Trial 98 finished with value: -2006.5914306640625 and parameters: {'r_scaling': 1.6787343403404902	'unroll': 4	'update_epoch': 5	'discount': 0.9744231537761421	'lr': 0.00013961096226902607	'entropy': 0.0009428150039983006}. Best is trial 32 with value: -3556.81201171875. [0m
[32m[I 2022-01-19 22:05:55	222] [0m Trial 99 finished with value: -3181.31689453125 and parameters: {'r_scaling': 0.2184218753488334	'unroll': 3	'update_epoch': 6	'discount': 0.963482521600899	'lr': 0.00011341859407636424	'entropy': 0.008922039862203657}. Best is trial 32 with value: -3556.81201171875. [0m
[32m[I 2022-01-19 22:09:29	602] [0m Trial 100 finished with value: 105.60541534423828 and parameters: {'r_scaling': 0.15975364242776485	'unroll': 12	'update_epoch': 6	'discount': 0.9368308787201881	'lr': 0.00030098449981566083	'entropy': 0.007887076948238828}. Best is trial 32 with value: -3556.81201171875. [0m
[32m[I 2022-01-19 22:13:07	079] [0m Trial 101 finished with value: -3133.86181640625 and parameters: {'r_scaling': 0.23358352433059112	'unroll': 3	'update_epoch': 4	'discount': 0.9635183789776084	'lr': 0.00011362391036458529	'entropy': 0.010183446917206894}. Best is trial 32 with value: -3556.81201171875. [0m
[32m[I 2022-01-19 22:16:09	710] [0m Trial 102 finished with value: -2443.4111328125 and parameters: {'r_scaling': 0.11320418790837657	'unroll': 3	'update_epoch': 4	'discount': 0.9640629527193167	'lr': 0.00011437465378343533	'entropy': 0.01009514116946846}. Best is trial 32 with value: -3556.81201171875. [0m
[32m[I 2022-01-19 22:19:49	064] [0m Trial 103 finished with value: -3043.71923828125 and parameters: {'r_scaling': 0.22791265750067669	'unroll': 3	'update_epoch': 4	'discount': 0.960417043958771	'lr': 0.00012475382014428911	'entropy': 0.005746519683159595}. Best is trial 32 with value: -3556.81201171875. [0m
[32m[I 2022-01-19 22:23:33	594] [0m Trial 104 finished with value: -3089.0302734375 and parameters: {'r_scaling': 0.23552223672755995	'unroll': 3	'update_epoch': 3	'discount': 0.9613958878789732	'lr': 0.0001522119328335197	'entropy': 0.0055912578483684455}. Best is trial 32 with value: -3556.81201171875. [0m
[32m[I 2022-01-19 22:26:42	987] [0m Trial 105 finished with value: -2170.63037109375 and parameters: {'r_scaling': 0.22030623400140892	'unroll': 2	'update_epoch': 2	'discount': 0.9607376802882999	'lr': 0.0001835458892736868	'entropy': 0.006338111622869823}. Best is trial 32 with value: -3556.81201171875. [0m
[32m[I 2022-01-19 22:30:22	645] [0m Trial 106 finished with value: -2283.31298828125 and parameters: {'r_scaling': 0.07070819618390248	'unroll': 3	'update_epoch': 3	'discount': 0.9574854206227559	'lr': 0.00015691367221048861	'entropy': 0.009305444017477007}. Best is trial 32 with value: -3556.81201171875. [0m
[32m[I 2022-01-19 22:33:56	377] [0m Trial 107 finished with value: -1433.6024169921875 and parameters: {'r_scaling': 0.2332431044636055	'unroll': 4	'update_epoch': 2	'discount': 0.9664614793592189	'lr': 0.00014810367160329242	'entropy': 0.006177118309688133}. Best is trial 32 with value: -3556.81201171875. [0m
[32m[I 2022-01-19 22:37:42	427] [0m Trial 108 finished with value: -1974.9072265625 and parameters: {'r_scaling': 0.20324394185846117	'unroll': 2	'update_epoch': 3	'discount': 0.9554615024725333	'lr': 0.0001660622848778402	'entropy': 0.020548312809054874}. Best is trial 32 with value: -3556.81201171875. [0m
[32m[I 2022-01-19 22:41:18	313] [0m Trial 109 finished with value: -1576.924560546875 and parameters: {'r_scaling': 0.12457224733255075	'unroll': 5	'update_epoch': 4	'discount': 0.9633107679637704	'lr': 0.00012917017753524872	'entropy': 0.005489626911350633}. Best is trial 32 with value: -3556.81201171875. [0m
[32m[I 2022-01-19 22:45:02	161] [0m Trial 110 finished with value: -699.5739135742188 and parameters: {'r_scaling': 0.2929631284394655	'unroll': 1	'update_epoch': 4	'discount': 0.959642759802309	'lr': 0.00012124863990993184	'entropy': 0.011144524341426331}. Best is trial 32 with value: -3556.81201171875. [0m
[32m[I 2022-01-19 22:48:42	039] [0m Trial 111 finished with value: -3061.806640625 and parameters: {'r_scaling': 0.35841449880043924	'unroll': 3	'update_epoch': 4	'discount': 0.9678769324067199	'lr': 0.00011377334462360459	'entropy': 0.009374515826045144}. Best is trial 32 with value: -3556.81201171875. [0m
[32m[I 2022-01-19 22:52:19	340] [0m Trial 112 finished with value: -3139.51416015625 and parameters: {'r_scaling': 0.3444967705423717	'unroll': 3	'update_epoch': 3	'discount': 0.9672496622543014	'lr': 0.0001351636718749065	'entropy': 0.008991681762508235}. Best is trial 32 with value: -3556.81201171875. [0m
[32m[I 2022-01-19 22:55:55	937] [0m Trial 113 finished with value: -1293.123291015625 and parameters: {'r_scaling': 0.34383213532404694	'unroll': 4	'update_epoch': 1	'discount': 0.9681587076178637	'lr': 0.00013705520433894506	'entropy': 0.008874387480805103}. Best is trial 32 with value: -3556.81201171875. [0m
[32m[I 2022-01-19 22:59:35	381] [0m Trial 114 finished with value: -2654.306884765625 and parameters: {'r_scaling': 0.15407433112166985	'unroll': 3	'update_epoch': 3	'discount': 0.9622342140135363	'lr': 0.0001306233632864375	'entropy': 0.014319021028013005}. Best is trial 32 with value: -3556.81201171875. [0m
[32m[I 2022-01-19 23:03:15	466] [0m Trial 115 finished with value: -2454.771728515625 and parameters: {'r_scaling': 0.41595558723101567	'unroll': 3	'update_epoch': 2	'discount': 0.9665087637554464	'lr': 0.0001451810032400467	'entropy': 0.007344439375479207}. Best is trial 32 with value: -3556.81201171875. [0m
[32m[I 2022-01-19 23:06:27	530] [0m Trial 116 finished with value: 120.15483093261719 and parameters: {'r_scaling': 0.20557955117979843	'unroll': 2	'update_epoch': 4	'discount': 0.9593193401085706	'lr': 0.0004194480897953331	'entropy': 0.006718179624106506}. Best is trial 32 with value: -3556.81201171875. [0m
[32m[I 2022-01-19 23:10:16	594] [0m Trial 117 finished with value: -2333.5302734375 and parameters: {'r_scaling': 0.2561756756403349	'unroll': 4	'update_epoch': 3	'discount': 0.9705229278230991	'lr': 0.00015580500668155382	'entropy': 0.009556789846882926}. Best is trial 32 with value: -3556.81201171875. [0m
[32m[I 2022-01-19 23:13:54	052] [0m Trial 118 finished with value: -3177.04638671875 and parameters: {'r_scaling': 0.5711868489403197	'unroll': 3	'update_epoch': 3	'discount': 0.964802707163689	'lr': 0.0001736295355541257	'entropy': 0.008043606527515698}. Best is trial 32 with value: -3556.81201171875. [0m
[32m[I 2022-01-19 23:17:29	727] [0m Trial 119 finished with value: -1910.602783203125 and parameters: {'r_scaling': 0.35682072090236017	'unroll': 2	'update_epoch': 4	'discount': 0.9637793662270212	'lr': 0.0001133892957673398	'entropy': 0.010905439378865766}. Best is trial 32 with value: -3556.81201171875. [0m
[32m[I 2022-01-19 23:21:14	484] [0m Trial 120 finished with value: -2335.44873046875 and parameters: {'r_scaling': 0.5679037805817128	'unroll': 4	'update_epoch': 3	'discount': 0.9528823148427299	'lr': 0.0001944093082140653	'entropy': 0.008608163432095814}. Best is trial 32 with value: -3556.81201171875. [0m
[32m[I 2022-01-19 23:24:52	843] [0m Trial 121 finished with value: -2591.49755859375 and parameters: {'r_scaling': 0.2690817995546118	'unroll': 3	'update_epoch': 2	'discount': 0.9682841785179007	'lr': 0.00017370015256523095	'entropy': 0.005546635591963369}. Best is trial 32 with value: -3556.81201171875. [0m
[32m[I 2022-01-19 23:28:23	901] [0m Trial 122 finished with value: -2493.0927734375 and parameters: {'r_scaling': 0.1846917317147134	'unroll': 3	'update_epoch': 4	'discount': 0.929534189183206	'lr': 0.00012162954209932943	'entropy': 0.007636778250883114}. Best is trial 32 with value: -3556.81201171875. [0m
[32m[I 2022-01-19 23:32:00	403] [0m Trial 123 finished with value: -2307.78125 and parameters: {'r_scaling': 0.7040315819055974	'unroll': 3	'update_epoch': 3	'discount': 0.9655859621061463	'lr': 0.00013467849366754199	'entropy': 0.019816628291231805}. Best is trial 32 with value: -3556.81201171875. [0m
[32m[I 2022-01-19 23:35:47	248] [0m Trial 124 finished with value: -1605.5313720703125 and parameters: {'r_scaling': 0.42522241079130146	'unroll': 2	'update_epoch': 8	'discount': 0.9614504590082952	'lr': 0.00010942185637742611	'entropy': 0.004091045687308487}. Best is trial 32 with value: -3556.81201171875. [0m
[32m[I 2022-01-19 23:39:21	665] [0m Trial 125 finished with value: -2094.07666015625 and parameters: {'r_scaling': 0.31852301450153414	'unroll': 4	'update_epoch': 4	'discount': 0.9236695337653613	'lr': 0.0001260305100062883	'entropy': 0.015033194241590308}. Best is trial 32 with value: -3556.81201171875. [0m
[32m[I 2022-01-19 23:43:17	505] [0m Trial 126 finished with value: -1641.8907470703125 and parameters: {'r_scaling': 0.5100853295643496	'unroll': 3	'update_epoch': 1	'discount': 0.912388468685366	'lr': 0.00014313353752475335	'entropy': 0.012816662878201834}. Best is trial 32 with value: -3556.81201171875. [0m
[32m[I 2022-01-19 23:47:14	445] [0m Trial 127 finished with value: -2028.362060546875 and parameters: {'r_scaling': 0.09239544410859346	'unroll': 2	'update_epoch': 2	'discount': 0.9575970118327711	'lr': 0.00016262529525991305	'entropy': 0.010668740168896773}. Best is trial 32 with value: -3556.81201171875. [0m
[32m[I 2022-01-19 23:51:29	687] [0m Trial 128 finished with value: -3054.05078125 and parameters: {'r_scaling': 0.38326205824622356	'unroll': 3	'update_epoch': 5	'discount': 0.9748348199908974	'lr': 0.00011685415898391788	'entropy': 0.00489154173141482}. Best is trial 32 with value: -3556.81201171875. [0m
[32m[I 2022-01-19 23:55:37	460] [0m Trial 129 finished with value: -2847.9384765625 and parameters: {'r_scaling': 0.6189850850283837	'unroll': 3	'update_epoch': 5	'discount': 0.9750862104445616	'lr': 0.00011520349503782902	'entropy': 0.004923008981754289}. Best is trial 32 with value: -3556.81201171875. [0m
[32m[I 2022-01-19 23:59:37	074] [0m Trial 130 finished with value: -3542.853759765625 and parameters: {'r_scaling': 0.34471407016661193	'unroll': 3	'update_epoch': 5	'discount': 0.9711302741627348	'lr': 0.00010653849140417504	'entropy': 0.005979094437216213}. Best is trial 32 with value: -3556.81201171875. [0m
[32m[I 2022-01-20 00:03:25	020] [0m Trial 131 finished with value: -3302.09521484375 and parameters: {'r_scaling': 0.386807896451279	'unroll': 3	'update_epoch': 5	'discount': 0.9704356032826348	'lr': 0.00010571553832131464	'entropy': 0.005878842134640958}. Best is trial 32 with value: -3556.81201171875. [0m
[32m[I 2022-01-20 00:07:05	954] [0m Trial 132 finished with value: -2609.053955078125 and parameters: {'r_scaling': 0.3756901909689467	'unroll': 3	'update_epoch': 5	'discount': 0.9735108392066802	'lr': 0.00010805210378945545	'entropy': 0.005662096632235903}. Best is trial 32 with value: -3556.81201171875. [0m
[32m[I 2022-01-20 00:10:47	730] [0m Trial 133 finished with value: -2322.3193359375 and parameters: {'r_scaling': 0.29510222487700005	'unroll': 4	'update_epoch': 5	'discount': 0.9710433914856297	'lr': 0.00011738484866631685	'entropy': 0.006739495968553035}. Best is trial 32 with value: -3556.81201171875. [0m
[32m[I 2022-01-20 00:14:38	358] [0m Trial 134 finished with value: -2128.384033203125 and parameters: {'r_scaling': 0.45211686092413006	'unroll': 2	'update_epoch': 4	'discount': 0.96711086489893	'lr': 0.00012435660280554425	'entropy': 0.008531457319218809}. Best is trial 32 with value: -3556.81201171875. [0m
[32m[I 2022-01-20 00:18:18	196] [0m Trial 135 finished with value: 105.58967590332031 and parameters: {'r_scaling': 0.24043176640510158	'unroll': 10	'update_epoch': 5	'discount': 0.9700966024189613	'lr': 0.00010660055368357984	'entropy': 0.0038898839402296812}. Best is trial 32 with value: -3556.81201171875. [0m
[32m[I 2022-01-20 00:22:20	602] [0m Trial 136 finished with value: -2419.99462890625 and parameters: {'r_scaling': 0.3449314305512433	'unroll': 2	'update_epoch': 4	'discount': 0.9650383359723222	'lr': 0.00013272279944476394	'entropy': 0.006969808945848746}. Best is trial 32 with value: -3556.81201171875. [0m
[32m[I 2022-01-20 00:25:27	418] [0m Trial 137 finished with value: -2497.147216796875 and parameters: {'r_scaling': 0.543519812239033	'unroll': 3	'update_epoch': 3	'discount': 0.9629199134383336	'lr': 0.00011148703350643082	'entropy': 0.006018865061900315}. Best is trial 32 with value: -3556.81201171875. [0m
[32m[I 2022-01-20 00:29:14	505] [0m Trial 138 finished with value: -2179.749267578125 and parameters: {'r_scaling': 0.39684388685277355	'unroll': 4	'update_epoch': 5	'discount': 0.976971478784202	'lr': 0.00011720388774335567	'entropy': 0.0049130434022415}. Best is trial 32 with value: -3556.81201171875. [0m
[32m[I 2022-01-20 00:32:52	701] [0m Trial 139 finished with value: -2549.072021484375 and parameters: {'r_scaling': 0.7517876634013846	'unroll': 3	'update_epoch': 4	'discount': 0.9688628453437051	'lr': 0.000152608521379778	'entropy': 0.008474968680366226}. Best is trial 32 with value: -3556.81201171875. [0m
[32m[I 2022-01-20 00:36:42	437] [0m Trial 140 finished with value: -963.20068359375 and parameters: {'r_scaling': 0.14488338035959272	'unroll': 2	'update_epoch': 6	'discount': 0.972187959334222	'lr': 0.0001248115694128149	'entropy': 0.0035376814737552342}. Best is trial 32 with value: -3556.81201171875. [0m
[32m[I 2022-01-20 00:40:31	473] [0m Trial 141 finished with value: -2626.24560546875 and parameters: {'r_scaling': 0.30221554606755335	'unroll': 3	'update_epoch': 6	'discount': 0.9605746632704576	'lr': 0.00010302640439345396	'entropy': 0.009747403375198006}. Best is trial 32 with value: -3556.81201171875. [0m
[32m[I 2022-01-20 00:44:15	834] [0m Trial 142 finished with value: -2868.242919921875 and parameters: {'r_scaling': 0.6263425286602577	'unroll': 3	'update_epoch': 5	'discount': 0.9666239789503677	'lr': 0.00010830816033755326	'entropy': 0.007101578627094462}. Best is trial 32 with value: -3556.81201171875. [0m
[32m[I 2022-01-20 00:48:06	629] [0m Trial 143 finished with value: -2613.56201171875 and parameters: {'r_scaling': 0.18700893152429793	'unroll': 3	'update_epoch': 6	'discount': 0.9640579535396531	'lr': 0.00010028585197334325	'entropy': 0.00485494477549934}. Best is trial 32 with value: -3556.81201171875. [0m
[32m[I 2022-01-20 00:51:51	708] [0m Trial 144 finished with value: -2454.66259765625 and parameters: {'r_scaling': 0.4855477946087418	'unroll': 4	'update_epoch': 7	'discount': 0.9739355238893679	'lr': 0.00011298550969637842	'entropy': 0.007914712425627387}. Best is trial 32 with value: -3556.81201171875. [0m
[32m[I 2022-01-20 00:55:50	987] [0m Trial 145 finished with value: -3001.06982421875 and parameters: {'r_scaling': 0.23422526294496906	'unroll': 3	'update_epoch': 3	'discount': 0.9549177627406157	'lr': 0.0001212916208960149	'entropy': 0.0011734257687144283}. Best is trial 32 with value: -3556.81201171875. [0m
[32m[I 2022-01-20 00:59:43	855] [0m Trial 146 finished with value: -2972.97216796875 and parameters: {'r_scaling': 0.2375449289644211	'unroll': 3	'update_epoch': 3	'discount': 0.9594713262557097	'lr': 0.00013171426565270522	'entropy': 0.0011700984834667498}. Best is trial 32 with value: -3556.81201171875. [0m
[32m[I 2022-01-20 01:03:42	186] [0m Trial 147 finished with value: -2047.7998046875 and parameters: {'r_scaling': 0.2852900356105062	'unroll': 4	'update_epoch': 3	'discount': 0.9616866028592117	'lr': 0.00012054091637620782	'entropy': 0.005434986963525389}. Best is trial 32 with value: -3556.81201171875. [0m
[32m[I 2022-01-20 01:07:45	159] [0m Trial 148 finished with value: -1703.041259765625 and parameters: {'r_scaling': 0.18132077572697478	'unroll': 2	'update_epoch': 4	'discount': 0.9586260849064037	'lr': 0.00013708741690429698	'entropy': 0.001340339526803294}. Best is trial 32 with value: -3556.81201171875. [0m
[32m[I 2022-01-20 01:11:40	267] [0m Trial 149 finished with value: -1310.45703125 and parameters: {'r_scaling': 54.00572840239355	'unroll': 3	'update_epoch': 3	'discount': 0.9547034132682968	'lr': 0.00011749700477197558	'entropy': 0.0017123300137154296}. Best is trial 32 with value: -3556.81201171875. [0m
[32m[I 2022-01-20 01:15:43	404] [0m Trial 150 finished with value: -1848.830810546875 and parameters: {'r_scaling': 0.39609738483102913	'unroll': 2	'update_epoch': 4	'discount': 0.9698802642003788	'lr': 0.00012637373703654005	'entropy': 0.002995955604671566}. Best is trial 32 with value: -3556.81201171875. [0m
[32m[I 2022-01-20 01:19:46	522] [0m Trial 151 finished with value: -2473.68310546875 and parameters: {'r_scaling': 0.2317082439160225	'unroll': 3	'update_epoch': 3	'discount': 0.9511916847871789	'lr': 0.0001312113955050898	'entropy': 0.0010105138133963724}. Best is trial 32 with value: -3556.81201171875. [0m
[32m[I 2022-01-20 01:23:48	111] [0m Trial 152 finished with value: -2763.746337890625 and parameters: {'r_scaling': 0.23988553608394828	'unroll': 3	'update_epoch': 3	'discount': 0.9592770736743438	'lr': 0.00014480696091124566	'entropy': 0.0011235693446302614}. Best is trial 32 with value: -3556.81201171875. [0m
[32m[I 2022-01-20 01:27:43	298] [0m Trial 153 finished with value: -1855.78515625 and parameters: {'r_scaling': 0.30748418075154943	'unroll': 4	'update_epoch': 2	'discount': 0.9561011299225507	'lr': 0.0006560114973954706	'entropy': 0.0012591260799572745}. Best is trial 32 with value: -3556.81201171875. [0m
[32m[I 2022-01-20 01:31:38	944] [0m Trial 154 finished with value: -2729.673828125 and parameters: {'r_scaling': 0.3608717726194984	'unroll': 3	'update_epoch': 3	'discount': 0.9622453120020075	'lr': 0.00010635645473844958	'entropy': 0.0008099197059342321}. Best is trial 32 with value: -3556.81201171875. [0m
[32m[I 2022-01-20 01:35:49	094] [0m Trial 155 finished with value: -3127.11572265625 and parameters: {'r_scaling': 0.25558073117142743	'unroll': 3	'update_epoch': 4	'discount': 0.9648406901723882	'lr': 0.00011320046308897511	'entropy': 0.0014992381865049887}. Best is trial 32 with value: -3556.81201171875. [0m
[32m[I 2022-01-20 01:39:43	628] [0m Trial 156 finished with value: -2623.411376953125 and parameters: {'r_scaling': 0.45859066677121063	'unroll': 2	'update_epoch': 4	'discount': 0.9652597743540151	'lr': 0.00011393306469381803	'entropy': 0.0015385916800599903}. Best is trial 32 with value: -3556.81201171875. [0m
[32m[I 2022-01-20 01:43:38	123] [0m Trial 157 finished with value: -3327.734619140625 and parameters: {'r_scaling': 0.19488933475715245	'unroll': 3	'update_epoch': 5	'discount': 0.9630821770184353	'lr': 0.00010743539471024491	'entropy': 0.006332537454848356}. Best is trial 32 with value: -3556.81201171875. [0m
[32m[I 2022-01-20 01:46:41	810] [0m Trial 158 finished with value: -2522.410400390625 and parameters: {'r_scaling': 0.11835423666730543	'unroll': 4	'update_epoch': 5	'discount': 0.9678932697813274	'lr': 0.00010668952902267047	'entropy': 0.006366822569487522}. Best is trial 32 with value: -3556.81201171875. [0m
[32m[I 2022-01-20 01:50:36	972] [0m Trial 159 finished with value: -2883.519287109375 and parameters: {'r_scaling': 0.19702841588158798	'unroll': 3	'update_epoch': 5	'discount': 0.9637979294830378	'lr': 0.00011291641906335893	'entropy': 0.002520465184109212}. Best is trial 32 with value: -3556.81201171875. [0m
[32m[I 2022-01-20 01:54:20	857] [0m Trial 160 finished with value: -2457.08837890625 and parameters: {'r_scaling': 0.1616462714898289	'unroll': 3	'update_epoch': 4	'discount': 0.9784258529453188	'lr': 0.0001071225567777577	'entropy': 0.004283203430393162}. Best is trial 32 with value: -3556.81201171875. [0m
[32m[I 2022-01-20 01:57:24	251] [0m Trial 161 finished with value: -3132.868408203125 and parameters: {'r_scaling': 0.27223732423516156	'unroll': 3	'update_epoch': 4	'discount': 0.9666590210697115	'lr': 0.0001227732533238403	'entropy': 0.0009262284301027197}. Best is trial 32 with value: -3556.81201171875. [0m
[32m[I 2022-01-20 02:01:27	438] [0m Trial 162 finished with value: -2744.090576171875 and parameters: {'r_scaling': 0.269576102635324	'unroll': 3	'update_epoch': 5	'discount': 0.9660011719940055	'lr': 0.00011959432350355478	'entropy': 0.000941578901592286}. Best is trial 32 with value: -3556.81201171875. [0m
[32m[I 2022-01-20 02:05:36	286] [0m Trial 163 finished with value: -2425.0400390625 and parameters: {'r_scaling': 0.35344706012392624	'unroll': 2	'update_epoch': 4	'discount': 0.9680637805175697	'lr': 0.00011201033795563224	'entropy': 0.0060122486703475956}. Best is trial 32 with value: -3556.81201171875. [0m
[32m[I 2022-01-20 02:08:41	441] [0m Trial 164 finished with value: -2646.443359375 and parameters: {'r_scaling': 0.5442449531340335	'unroll': 3	'update_epoch': 5	'discount': 0.9707309125581554	'lr': 0.00010004134961548482	'entropy': 0.002186490277917218}. Best is trial 32 with value: -3556.81201171875. [0m
[32m[I 2022-01-20 02:12:57	509] [0m Trial 165 finished with value: -2250.297607421875 and parameters: {'r_scaling': 0.4263975560976747	'unroll': 4	'update_epoch': 4	'discount': 0.9630393633119099	'lr': 0.00025293014107473355	'entropy': 0.0075705384574443505}. Best is trial 32 with value: -3556.81201171875. [0m
[32m[I 2022-01-20 02:16:50	900] [0m Trial 166 finished with value: -2711.87255859375 and parameters: {'r_scaling': 0.31930099429968817	'unroll': 3	'update_epoch': 4	'discount': 0.9653341349846323	'lr': 0.00012675565485557546	'entropy': 0.0007394377724688925}. Best is trial 32 with value: -3556.81201171875. [0m
[32m[I 2022-01-20 02:20:37	852] [0m Trial 167 finished with value: -939.6978759765625 and parameters: {'r_scaling': 0.19378895935638915	'unroll': 2	'update_epoch': 5	'discount': 0.9728649035411144	'lr': 0.00013897088709960708	'entropy': 0.012013853984387117}. Best is trial 32 with value: -3556.81201171875. [0m
[32m[I 2022-01-20 02:24:16	792] [0m Trial 168 finished with value: -1626.09228515625 and parameters: {'r_scaling': 0.1442773646778374	'unroll': 4	'update_epoch': 4	'discount': 0.9673398413463331	'lr': 0.0009852204823545144	'entropy': 0.008303604683962646}. Best is trial 32 with value: -3556.81201171875. [0m
[32m[I 2022-01-20 02:28:07	646] [0m Trial 169 finished with value: -2789.169189453125 and parameters: {'r_scaling': 0.572720437044201	'unroll': 3	'update_epoch': 5	'discount': 0.9612907513128276	'lr': 0.0001777156618130811	'entropy': 0.009732704893232727}. Best is trial 32 with value: -3556.81201171875. [0m
[32m[I 2022-01-20 02:31:58	699] [0m Trial 170 finished with value: -3078.70263671875 and parameters: {'r_scaling': 0.26052720906266524	'unroll': 3	'update_epoch': 4	'discount': 0.9688341993544405	'lr': 0.00011753031573169854	'entropy': 0.0013939592340999408}. Best is trial 32 with value: -3556.81201171875. [0m
[32m[I 2022-01-20 02:35:50	324] [0m Trial 171 finished with value: -3161.3193359375 and parameters: {'r_scaling': 0.2852750834761394	'unroll': 3	'update_epoch': 4	'discount': 0.9691252754135403	'lr': 0.00011766961739319172	'entropy': 0.0017912022917035474}. Best is trial 32 with value: -3556.81201171875. [0m
[32m[I 2022-01-20 02:39:47	342] [0m Trial 172 finished with value: -1659.594970703125 and parameters: {'r_scaling': 0.2820728682819195	'unroll': 7	'update_epoch': 4	'discount': 0.969327350378892	'lr': 0.00011913805674238515	'entropy': 0.0014907543338319165}. Best is trial 32 with value: -3556.81201171875. [0m
[32m[I 2022-01-20 02:43:45	663] [0m Trial 173 finished with value: -2517.927001953125 and parameters: {'r_scaling': 0.21366574526550802	'unroll': 3	'update_epoch': 4	'discount': 0.9719508450262492	'lr': 0.00010937263292814376	'entropy': 0.0017291313649470785}. Best is trial 32 with value: -3556.81201171875. [0m
[32m[I 2022-01-20 02:47:44	359] [0m Trial 174 finished with value: -3332.150390625 and parameters: {'r_scaling': 0.2629971616238229	'unroll': 3	'update_epoch': 4	'discount': 0.9753882417456283	'lr': 0.00012650664787036033	'entropy': 0.006628294423318955}. Best is trial 32 with value: -3556.81201171875. [0m
[32m[I 2022-01-20 02:51:49	804] [0m Trial 175 finished with value: -3350.9326171875 and parameters: {'r_scaling': 0.3319599408775974	'unroll': 3	'update_epoch': 5	'discount': 0.9762834654038288	'lr': 0.00010414742867157128	'entropy': 0.0020107266398005454}. Best is trial 32 with value: -3556.81201171875. [0m
[32m[I 2022-01-20 02:55:45	287] [0m Trial 176 finished with value: -2268.7275390625 and parameters: {'r_scaling': 0.27890689117091727	'unroll': 2	'update_epoch': 4	'discount': 0.9754567877618049	'lr': 0.0001049831229552161	'entropy': 0.0018573778860142614}. Best is trial 32 with value: -3556.81201171875. [0m
[32m[I 2022-01-20 02:59:45	978] [0m Trial 177 finished with value: -2782.2861328125 and parameters: {'r_scaling': 0.3257800861713986	'unroll': 3	'update_epoch': 5	'discount': 0.9712978162589165	'lr': 0.0001051126624809322	'entropy': 0.0021447277513910804}. Best is trial 32 with value: -3556.81201171875. [0m
[32m[I 2022-01-20 03:03:36	015] [0m Trial 178 finished with value: -2143.3701171875 and parameters: {'r_scaling': 0.17429395951155494	'unroll': 4	'update_epoch': 6	'discount': 0.9779251395628118	'lr': 0.0003377038512979861	'entropy': 0.00141872432500933}. Best is trial 32 with value: -3556.81201171875. [0m
[32m[I 2022-01-20 03:07:26	225] [0m Trial 179 finished with value: -3066.738525390625 and parameters: {'r_scaling': 0.24800635154809	'unroll': 3	'update_epoch': 4	'discount': 0.9684649711437731	'lr': 0.0001313362512347469	'entropy': 0.0026526404442629944}. Best is trial 32 with value: -3556.81201171875. [0m
[32m[I 2022-01-20 03:11:09	189] [0m Trial 180 finished with value: -1354.55615234375 and parameters: {'r_scaling': 0.256391451437918	'unroll': 2	'update_epoch': 3	'discount': 0.9736977242823577	'lr': 0.00013367983895553977	'entropy': 0.002424698358369657}. Best is trial 32 with value: -3556.81201171875. [0m
[32m[I 2022-01-20 03:14:18	990] [0m Trial 181 finished with value: -2409.9052734375 and parameters: {'r_scaling': 0.20518937743131715	'unroll': 3	'update_epoch': 4	'discount': 0.9683462381973355	'lr': 0.00015202065632337564	'entropy': 0.0019500956205437535}. Best is trial 32 with value: -3556.81201171875. [0m
[32m[I 2022-01-20 03:18:00	662] [0m Trial 182 finished with value: -3257.87451171875 and parameters: {'r_scaling': 0.3241125409226362	'unroll': 3	'update_epoch': 4	'discount': 0.9665558961746967	'lr': 0.000113050090366064	'entropy': 0.0015219833451137065}. Best is trial 32 with value: -3556.81201171875. [0m
[32m[I 2022-01-20 03:21:35	304] [0m Trial 183 finished with value: -3046.54248046875 and parameters: {'r_scaling': 0.25715493846748283	'unroll': 3	'update_epoch': 4	'discount': 0.9658946856198394	'lr': 0.00012080370852074993	'entropy': 0.001413727680710245}. Best is trial 32 with value: -3556.81201171875. [0m
[32m[I 2022-01-20 03:25:07	839] [0m Trial 184 finished with value: -2794.40234375 and parameters: {'r_scaling': 0.29196805781010093	'unroll': 3	'update_epoch': 5	'discount': 0.9696792245217632	'lr': 0.00012513272302142612	'entropy': 0.00221816945392654}. Best is trial 32 with value: -3556.81201171875. [0m
[32m[I 2022-01-20 03:28:50	743] [0m Trial 185 finished with value: -2151.283203125 and parameters: {'r_scaling': 0.4327857311425914	'unroll': 3	'update_epoch': 3	'discount': 0.9642702213545111	'lr': 0.00010033515224886374	'entropy': 0.002706287939441959}. Best is trial 32 with value: -3556.81201171875. [0m
[32m[I 2022-01-20 03:32:19	924] [0m Trial 186 finished with value: -1882.55615234375 and parameters: {'r_scaling': 0.31796440956494637	'unroll': 4	'update_epoch': 4	'discount': 0.971022561765228	'lr': 0.0001116839981145421	'entropy': 0.0016960262927538826}. Best is trial 32 with value: -3556.81201171875. [0m
[32m[I 2022-01-20 03:35:58	651] [0m Trial 187 finished with value: -665.5534057617188 and parameters: {'r_scaling': 0.21571156285310394	'unroll': 2	'update_epoch': 5	'discount': 0.9661722861492317	'lr': 0.00014301095584451929	'entropy': 0.0019556814309593146}. Best is trial 32 with value: -3556.81201171875. [0m
[32m[I 2022-01-20 03:39:44	770] [0m Trial 188 finished with value: -2783.301513671875 and parameters: {'r_scaling': 0.1549672860951234	'unroll': 3	'update_epoch': 4	'discount': 0.9763783402553914	'lr': 0.00012857243247333996	'entropy': 0.0015331305670734203}. Best is trial 32 with value: -3556.81201171875. [0m
[32m[I 2022-01-20 03:43:42	608] [0m Trial 189 finished with value: -1106.055908203125 and parameters: {'r_scaling': 0.37435749744136715	'unroll': 1	'update_epoch': 3	'discount': 0.969453220531869	'lr': 0.00016313106007211832	'entropy': 0.0012795008176010242}. Best is trial 32 with value: -3556.81201171875. [0m
[32m[I 2022-01-20 03:47:38	708] [0m Trial 190 finished with value: -2824.75439453125 and parameters: {'r_scaling': 0.17434502117679607	'unroll': 3	'update_epoch': 5	'discount': 0.9637037343584738	'lr': 0.00010790038805403536	'entropy': 0.0016393848141352386}. Best is trial 32 with value: -3556.81201171875. [0m
[32m[I 2022-01-20 03:51:30	670] [0m Trial 191 finished with value: -3060.76318359375 and parameters: {'r_scaling': 0.2588385859936147	'unroll': 3	'update_epoch': 4	'discount': 0.9675332199811782	'lr': 0.00011596703257717228	'entropy': 0.006599807992568425}. Best is trial 32 with value: -3556.81201171875. [0m
[32m[I 2022-01-20 03:55:24	452] [0m Trial 192 finished with value: -3097.9208984375 and parameters: {'r_scaling': 0.3425889907262583	'unroll': 3	'update_epoch': 4	'discount': 0.9669559195402967	'lr': 0.0001151480440529555	'entropy': 0.007553083421522033}. Best is trial 32 with value: -3556.81201171875. [0m
[32m[I 2022-01-20 03:59:21	892] [0m Trial 193 finished with value: -2685.72021484375 and parameters: {'r_scaling': 0.32540094435267886	'unroll': 3	'update_epoch': 4	'discount': 0.972013415746358	'lr': 0.00010535668065411761	'entropy': 0.008084059823680002}. Best is trial 32 with value: -3556.81201171875. [0m
[32m[I 2022-01-20 04:03:18	476] [0m Trial 194 finished with value: -1947.4453125 and parameters: {'r_scaling': 0.41912912870834823	'unroll': 4	'update_epoch': 4	'discount': 0.9650241144787094	'lr': 0.00012132809865410621	'entropy': 0.0026508545120506543}. Best is trial 32 with value: -3556.81201171875. [0m
[32m[I 2022-01-20 04:07:12	551] [0m Trial 195 finished with value: -2511.0888671875 and parameters: {'r_scaling': 0.22602786585884635	'unroll': 3	'update_epoch': 3	'discount': 0.9673337942637751	'lr': 0.00011364881745991586	'entropy': 0.0019596173253218123}. Best is trial 32 with value: -3556.81201171875. [0m
[32m[I 2022-01-20 04:11:17	688] [0m Trial 196 finished with value: 100.22853088378906 and parameters: {'r_scaling': 0.2746891120130575	'unroll': 8	'update_epoch': 6	'discount': 0.9740459522879223	'lr': 0.0001358849952542968	'entropy': 0.0010893528460074102}. Best is trial 32 with value: -3556.81201171875. [0m
[32m[I 2022-01-20 04:14:23	448] [0m Trial 197 finished with value: -1673.41259765625 and parameters: {'r_scaling': 0.31555244778377434	'unroll': 2	'update_epoch': 4	'discount': 0.9689900986732237	'lr': 0.00010005155641589465	'entropy': 0.007421641009479413}. Best is trial 32 with value: -3556.81201171875. [0m
[32m[I 2022-01-20 04:18:09	559] [0m Trial 198 finished with value: -2411.046142578125 and parameters: {'r_scaling': 0.4818134699192775	'unroll': 3	'update_epoch': 5	'discount': 0.9628499842798923	'lr': 0.000112219731743996	'entropy': 0.0013867078264198163}. Best is trial 32 with value: -3556.81201171875. [0m
[32m[I 2022-01-20 04:21:55	751] [0m Trial 199 finished with value: -1749.2801513671875 and parameters: {'r_scaling': 0.6742906530517838	'unroll': 3	'update_epoch': 3	'discount': 0.9668537414048123	'lr': 0.0004945816677430938	'entropy': 0.0023037386012889046}. Best is trial 32 with value: -3556.81201171875. [0m
