# Supplementary material
Source: ML conference proceedings conference paper supplement (https://proceedings.neurips.cc/paper_files/paper/2022/hash/10a6bdcabbd5a3d36b760daa295f63c1-Abstract.html)
Supplement: Supplementary file 1 [file 10a6bdcabbd5a3d36b760daa295f63c1-Supplemental-Conference.zip › neurips2022/code/robotics_code/hp_searches/halfcheetah_1,25M.log]

[32m[I 2022-01-14 08:44:43	207] [0m A new study created in memory with name: no-name-990ec5b9-3d51-4c81-9dcf-d156e5e72c4f [0m
[32m[I 2022-01-14 08:48:09	620] [0m Trial 0 finished with value: 99.01410675048828 and parameters: {'r_scaling': 0.2035730680441531	'unroll': 15	'update_epoch': 12	'discount': 0.9268925463981078	'lr': 0.0004815622718923925	'entropy': 0.036462155772147946}. Best is trial 0 with value: 99.01410675048828. [0m
[32m[I 2022-01-14 08:51:37	681] [0m Trial 1 finished with value: 101.05538940429688 and parameters: {'r_scaling': 0.20573117472430302	'unroll': 11	'update_epoch': 2	'discount': 0.9254055885067611	'lr': 0.0012236567013352024	'entropy': 0.052683227205137566}. Best is trial 0 with value: 99.01410675048828. [0m
[32m[I 2022-01-14 08:55:27	740] [0m Trial 2 finished with value: 110.240234375 and parameters: {'r_scaling': 1.4045699551817319	'unroll': 15	'update_epoch': 15	'discount': 0.9863854844683729	'lr': 0.00016155402113682797	'entropy': 0.0001135601012856434}. Best is trial 0 with value: 99.01410675048828. [0m
[32m[I 2022-01-14 08:59:02	279] [0m Trial 3 finished with value: 98.8762435913086 and parameters: {'r_scaling': 115.25704122152227	'unroll': 6	'update_epoch': 14	'discount': 0.9150665537853694	'lr': 0.00021761108022740338	'entropy': 0.0018552092084507892}. Best is trial 3 with value: 98.8762435913086. [0m
[32m[I 2022-01-14 09:02:34	985] [0m Trial 4 finished with value: 100.01785278320312 and parameters: {'r_scaling': 0.4441151398030868	'unroll': 8	'update_epoch': 4	'discount': 0.9526417780920067	'lr': 0.00014789164775740697	'entropy': 0.00023412406022617216}. Best is trial 3 with value: 98.8762435913086. [0m
[32m[I 2022-01-14 09:05:39	586] [0m Trial 5 finished with value: 105.01567077636719 and parameters: {'r_scaling': 8.918455179296313	'unroll': 14	'update_epoch': 11	'discount': 0.9394815494774402	'lr': 0.00148324638394206	'entropy': 0.003705740314261439}. Best is trial 3 with value: 98.8762435913086. [0m
[32m[I 2022-01-14 09:09:11	684] [0m Trial 6 finished with value: 101.50570678710938 and parameters: {'r_scaling': 2.261655997916841	'unroll': 13	'update_epoch': 8	'discount': 0.9172077933870731	'lr': 0.0009108455583128674	'entropy': 0.005066763124600612}. Best is trial 3 with value: 98.8762435913086. [0m
[32m[I 2022-01-14 09:12:35	912] [0m Trial 7 finished with value: 99.05122375488281 and parameters: {'r_scaling': 3.1756905014183165	'unroll': 11	'update_epoch': 14	'discount': 0.9619655630847533	'lr': 0.0011986764860136476	'entropy': 0.007553364536219088}. Best is trial 3 with value: 98.8762435913086. [0m
[32m[I 2022-01-14 09:15:26	722] [0m Trial 8 finished with value: 104.08658599853516 and parameters: {'r_scaling': 0.06757034484084973	'unroll': 6	'update_epoch': 2	'discount': 0.9366505429810423	'lr': 0.0010122213480302314	'entropy': 0.005595236913834438}. Best is trial 3 with value: 98.8762435913086. [0m
[32m[I 2022-01-14 09:18:38	786] [0m Trial 9 finished with value: 96.42218780517578 and parameters: {'r_scaling': 7.726759054123027	'unroll': 14	'update_epoch': 15	'discount': 0.9948136690459967	'lr': 0.0002564078792664882	'entropy': 0.00045667486764132284}. Best is trial 9 with value: 96.42218780517578. [0m
[32m[I 2022-01-14 09:21:40	536] [0m Trial 10 finished with value: -1735.897216796875 and parameters: {'r_scaling': 33.92211380952915	'unroll': 1	'update_epoch': 8	'discount': 0.9921426776983995	'lr': 0.00033502080755070843	'entropy': 0.0007122549324185512}. Best is trial 10 with value: -1735.897216796875. [0m
[32m[I 2022-01-14 09:25:14	961] [0m Trial 11 finished with value: -1628.59423828125 and parameters: {'r_scaling': 51.64426217391064	'unroll': 1	'update_epoch': 6	'discount': 0.9949673821849188	'lr': 0.00031680810259355455	'entropy': 0.0005687978826977675}. Best is trial 10 with value: -1735.897216796875. [0m
[32m[I 2022-01-14 09:28:18	276] [0m Trial 12 finished with value: -1782.83251953125 and parameters: {'r_scaling': 95.80716685809568	'unroll': 1	'update_epoch': 7	'discount': 0.9758034624611692	'lr': 0.0004427653423380779	'entropy': 0.000843356228445042}. Best is trial 12 with value: -1782.83251953125. [0m
[32m[I 2022-01-14 09:32:01	026] [0m Trial 13 finished with value: -1182.114990234375 and parameters: {'r_scaling': 37.55926891143141	'unroll': 1	'update_epoch': 8	'discount': 0.9737735907251666	'lr': 0.0005282567234193652	'entropy': 0.0013334810429538474}. Best is trial 12 with value: -1782.83251953125. [0m
[32m[I 2022-01-14 09:35:20	937] [0m Trial 14 finished with value: 100.85991668701172 and parameters: {'r_scaling': 147.09428778971676	'unroll': 3	'update_epoch': 10	'discount': 0.9731492173250346	'lr': 0.0007293684778423955	'entropy': 0.000789992483642956}. Best is trial 12 with value: -1782.83251953125. [0m
[32m[I 2022-01-14 09:38:37	246] [0m Trial 15 finished with value: 107.12372589111328 and parameters: {'r_scaling': 18.499017333217775	'unroll': 4	'update_epoch': 6	'discount': 0.9755392663174407	'lr': 0.0003926756147211124	'entropy': 0.017398296948402364}. Best is trial 12 with value: -1782.83251953125. [0m
[32m[I 2022-01-14 09:41:53	550] [0m Trial 16 finished with value: 96.72776794433594 and parameters: {'r_scaling': 46.82685875467698	'unroll': 3	'update_epoch': 6	'discount': 0.9610424520603812	'lr': 0.00010539678236738784	'entropy': 0.0002992294771272294}. Best is trial 12 with value: -1782.83251953125. [0m
[32m[I 2022-01-14 09:45:14	721] [0m Trial 17 finished with value: 95.49608612060547 and parameters: {'r_scaling': 192.96590535344632	'unroll': 5	'update_epoch': 9	'discount': 0.9822455965809416	'lr': 0.0006216001375547466	'entropy': 0.0016057241220934063}. Best is trial 12 with value: -1782.83251953125. [0m
[32m[I 2022-01-14 09:48:35	146] [0m Trial 18 finished with value: 108.76367950439453 and parameters: {'r_scaling': 17.536752829676086	'unroll': 8	'update_epoch': 4	'discount': 0.9610859222559248	'lr': 0.0003350412050608395	'entropy': 0.00011171075342473384}. Best is trial 12 with value: -1782.83251953125. [0m
[32m[I 2022-01-14 09:51:56	137] [0m Trial 19 finished with value: 99.68977355957031 and parameters: {'r_scaling': 66.01145930312641	'unroll': 2	'update_epoch': 7	'discount': 0.9842098513701932	'lr': 0.00021637879631669884	'entropy': 0.0009993452372357124}. Best is trial 12 with value: -1782.83251953125. [0m
[32m[I 2022-01-14 09:55:04	664] [0m Trial 20 finished with value: -1306.97900390625 and parameters: {'r_scaling': 18.569179140537113	'unroll': 1	'update_epoch': 4	'discount': 0.9499708850131084	'lr': 0.000729868787835824	'entropy': 0.01444131094909783}. Best is trial 12 with value: -1782.83251953125. [0m
[32m[I 2022-01-14 09:58:48	241] [0m Trial 21 finished with value: -1299.7860107421875 and parameters: {'r_scaling': 81.3143757505705	'unroll': 1	'update_epoch': 6	'discount': 0.9931977707924151	'lr': 0.0003053630320722356	'entropy': 0.0005264010156201992}. Best is trial 12 with value: -1782.83251953125. [0m
[32m[I 2022-01-14 10:01:45	353] [0m Trial 22 finished with value: 98.352294921875 and parameters: {'r_scaling': 48.00239003632576	'unroll': 3	'update_epoch': 5	'discount': 0.994944054207779	'lr': 0.00039887229945418604	'entropy': 0.0003126189881586614}. Best is trial 12 with value: -1782.83251953125. [0m
[32m[I 2022-01-14 10:05:05	615] [0m Trial 23 finished with value: 108.23811340332031 and parameters: {'r_scaling': 25.653812326359688	'unroll': 2	'update_epoch': 8	'discount': 0.9043225068674137	'lr': 0.0002672529554111962	'entropy': 0.002051113653416139}. Best is trial 12 with value: -1782.83251953125. [0m
[32m[I 2022-01-14 10:08:22	709] [0m Trial 24 finished with value: 94.0833740234375 and parameters: {'r_scaling': 8.44919791391003	'unroll': 5	'update_epoch': 9	'discount': 0.9799228320100412	'lr': 0.0019139452074154021	'entropy': 0.0006865788580217815}. Best is trial 12 with value: -1782.83251953125. [0m
[32m[I 2022-01-14 10:11:45	114] [0m Trial 25 finished with value: 103.30371856689453 and parameters: {'r_scaling': 95.9084772508906	'unroll': 2	'update_epoch': 7	'discount': 0.968261590163453	'lr': 0.00043621262080184656	'entropy': 0.00020348009069885906}. Best is trial 12 with value: -1782.83251953125. [0m
[32m[I 2022-01-14 10:15:01	487] [0m Trial 26 finished with value: 105.16078186035156 and parameters: {'r_scaling': 4.412058035750015	'unroll': 4	'update_epoch': 10	'discount': 0.9883624159087402	'lr': 0.00018192341106568004	'entropy': 0.002430416396203977}. Best is trial 12 with value: -1782.83251953125. [0m
[32m[I 2022-01-14 10:18:39	849] [0m Trial 27 finished with value: -1405.28369140625 and parameters: {'r_scaling': 28.368881569091478	'unroll': 1	'update_epoch': 3	'discount': 0.9686674994946153	'lr': 0.00034719204798630755	'entropy': 0.0004165413847578049}. Best is trial 12 with value: -1782.83251953125. [0m
[32m[I 2022-01-14 10:22:04	153] [0m Trial 28 finished with value: 105.18826293945312 and parameters: {'r_scaling': 194.25517491054407	'unroll': 7	'update_epoch': 12	'discount': 0.9865619496472796	'lr': 0.0005708421662167978	'entropy': 0.0010691678734502587}. Best is trial 12 with value: -1782.83251953125. [0m
[32m[I 2022-01-14 10:25:19	278] [0m Trial 29 finished with value: 109.78276062011719 and parameters: {'r_scaling': 11.828421302445632	'unroll': 10	'update_epoch': 1	'discount': 0.9766830618341391	'lr': 0.0002783321559677494	'entropy': 0.0006429428617864641}. Best is trial 12 with value: -1782.83251953125. [0m
[32m[I 2022-01-14 10:28:05	487] [0m Trial 30 finished with value: 101.1457290649414 and parameters: {'r_scaling': 1.0337374008040996	'unroll': 4	'update_epoch': 5	'discount': 0.9887307033192125	'lr': 0.00048368992709101993	'entropy': 0.00015199833798187315}. Best is trial 12 with value: -1782.83251953125. [0m
[32m[I 2022-01-14 10:31:39	315] [0m Trial 31 finished with value: -1572.4583740234375 and parameters: {'r_scaling': 30.885267663958867	'unroll': 1	'update_epoch': 3	'discount': 0.9697087153478581	'lr': 0.000346692628609391	'entropy': 0.0003273802417019897}. Best is trial 12 with value: -1782.83251953125. [0m
[32m[I 2022-01-14 10:34:58	890] [0m Trial 32 finished with value: 104.22370147705078 and parameters: {'r_scaling': 64.0831496636191	'unroll': 2	'update_epoch': 7	'discount': 0.9678995331769413	'lr': 0.0003627620827178825	'entropy': 0.0003679610622945977}. Best is trial 12 with value: -1782.83251953125. [0m
[32m[I 2022-01-14 10:37:54	603] [0m Trial 33 finished with value: -1026.624755859375 and parameters: {'r_scaling': 28.9785432105976	'unroll': 1	'update_epoch': 1	'discount': 0.981082693640106	'lr': 0.00044468838587912975	'entropy': 0.000923292290578968}. Best is trial 12 with value: -1782.83251953125. [0m
[32m[I 2022-01-14 10:41:12	139] [0m Trial 34 finished with value: 111.50090026855469 and parameters: {'r_scaling': 94.33177527752225	'unroll': 3	'update_epoch': 3	'discount': 0.9901755656042944	'lr': 0.00024030029807462977	'entropy': 0.0002007796007978514}. Best is trial 12 with value: -1782.83251953125. [0m
[32m[I 2022-01-14 10:44:25	936] [0m Trial 35 finished with value: 105.01116943359375 and parameters: {'r_scaling': 49.8341724643409	'unroll': 2	'update_epoch': 5	'discount': 0.9810772455208027	'lr': 0.00019313551061190715	'entropy': 0.0006136323014805907}. Best is trial 12 with value: -1782.83251953125. [0m
[32m[I 2022-01-14 10:47:27	287] [0m Trial 36 finished with value: -2363.2802734375 and parameters: {'r_scaling': 5.414630288629854	'unroll': 1	'update_epoch': 9	'discount': 0.9549210254509746	'lr': 0.0001428899476010926	'entropy': 0.0029908542347040724}. Best is trial 36 with value: -2363.2802734375. [0m
[32m[I 2022-01-14 10:50:46	190] [0m Trial 37 finished with value: 99.6221923828125 and parameters: {'r_scaling': 0.5791944614529515	'unroll': 5	'update_epoch': 9	'discount': 0.9429251116168381	'lr': 0.0001364942000925344	'entropy': 0.003004041497047169}. Best is trial 36 with value: -2363.2802734375. [0m
[32m[I 2022-01-14 10:54:06	578] [0m Trial 38 finished with value: 99.45243835449219 and parameters: {'r_scaling': 5.843845060724636	'unroll': 9	'update_epoch': 11	'discount': 0.9512592995725762	'lr': 0.00012020752125180421	'entropy': 0.04931867635653905}. Best is trial 36 with value: -2363.2802734375. [0m
[32m[I 2022-01-14 10:57:21	199] [0m Trial 39 finished with value: 98.0101089477539 and parameters: {'r_scaling': 2.5998407649062356	'unroll': 3	'update_epoch': 10	'discount': 0.9585926368406028	'lr': 0.00016520820245011372	'entropy': 0.011332239547972215}. Best is trial 36 with value: -2363.2802734375. [0m
[32m[I 2022-01-14 11:00:40	033] [0m Trial 40 finished with value: 108.64617919921875 and parameters: {'r_scaling': 1.4977009647106658	'unroll': 12	'update_epoch': 8	'discount': 0.922299868667341	'lr': 0.0006796081225092945	'entropy': 0.004338253556657869}. Best is trial 36 with value: -2363.2802734375. [0m
[32m[I 2022-01-14 11:04:21	628] [0m Trial 41 finished with value: -2420.6123046875 and parameters: {'r_scaling': 12.087395045147328	'unroll': 1	'update_epoch': 7	'discount': 0.9668919827283133	'lr': 0.0003092651385845256	'entropy': 0.00136351280873421}. Best is trial 41 with value: -2420.6123046875. [0m
[32m[I 2022-01-14 11:07:44	289] [0m Trial 42 finished with value: 96.85966491699219 and parameters: {'r_scaling': 11.477305816557955	'unroll': 2	'update_epoch': 7	'discount': 0.9570729919944418	'lr': 0.0002983050198697965	'entropy': 0.0013795744815330794}. Best is trial 41 with value: -2420.6123046875. [0m
[32m[I 2022-01-14 11:11:28	508] [0m Trial 43 finished with value: -2281.39697265625 and parameters: {'r_scaling': 4.974132679932006	'unroll': 1	'update_epoch': 6	'discount': 0.9334986750423916	'lr': 0.0002215947252071514	'entropy': 0.0023299003560711146}. Best is trial 41 with value: -2420.6123046875. [0m
[32m[I 2022-01-14 11:14:50	085] [0m Trial 44 finished with value: 105.52214813232422 and parameters: {'r_scaling': 4.889458842644766	'unroll': 2	'update_epoch': 9	'discount': 0.9307431491731666	'lr': 0.0001860743687989664	'entropy': 0.0026541689937748534}. Best is trial 41 with value: -2420.6123046875. [0m
[32m[I 2022-01-14 11:18:26	817] [0m Trial 45 finished with value: -2481.6357421875 and parameters: {'r_scaling': 3.9347759653233205	'unroll': 1	'update_epoch': 12	'discount': 0.9335482737841334	'lr': 0.00022655689734107942	'entropy': 0.005543940915986328}. Best is trial 45 with value: -2481.6357421875. [0m
[32m[I 2022-01-14 11:21:55	553] [0m Trial 46 finished with value: 101.41218566894531 and parameters: {'r_scaling': 1.6565396239478822	'unroll': 4	'update_epoch': 13	'discount': 0.9309622605513441	'lr': 0.0002232553915376946	'entropy': 0.005384376987587937}. Best is trial 45 with value: -2481.6357421875. [0m
[32m[I 2022-01-14 11:24:47	603] [0m Trial 47 finished with value: 100.88203430175781 and parameters: {'r_scaling': 3.5134626296919533	'unroll': 3	'update_epoch': 14	'discount': 0.945180278835496	'lr': 0.0001518807810025849	'entropy': 0.009170797078434406}. Best is trial 45 with value: -2481.6357421875. [0m
[32m[I 2022-01-14 11:28:26	283] [0m Trial 48 finished with value: -2069.760986328125 and parameters: {'r_scaling': 0.8914168470487777	'unroll': 1	'update_epoch': 12	'discount': 0.9368598636943556	'lr': 0.0001337067610087498	'entropy': 0.004029862887147354}. Best is trial 45 with value: -2481.6357421875. [0m
[32m[I 2022-01-14 11:31:47	924] [0m Trial 49 finished with value: 101.45634460449219 and parameters: {'r_scaling': 0.21723822045988717	'unroll': 6	'update_epoch': 12	'discount': 0.9362506204354386	'lr': 0.00012682134187167013	'entropy': 0.007028001869931977}. Best is trial 45 with value: -2481.6357421875. [0m
[32m[I 2022-01-14 11:35:09	934] [0m Trial 50 finished with value: 98.04945373535156 and parameters: {'r_scaling': 0.95778575833928	'unroll': 2	'update_epoch': 11	'discount': 0.9393109130109654	'lr': 0.00010178573617479947	'entropy': 0.021950176810608017}. Best is trial 45 with value: -2481.6357421875. [0m
[32m[I 2022-01-14 11:38:49	258] [0m Trial 51 finished with value: -2437.0478515625 and parameters: {'r_scaling': 2.3480318046260784	'unroll': 1	'update_epoch': 13	'discount': 0.9238407362672265	'lr': 0.0001674788417654333	'entropy': 0.0039213336424714805}. Best is trial 45 with value: -2481.6357421875. [0m
[32m[I 2022-01-14 11:42:31	492] [0m Trial 52 finished with value: -2512.79541015625 and parameters: {'r_scaling': 2.4348716844261795	'unroll': 1	'update_epoch': 13	'discount': 0.9217677934713021	'lr': 0.00016751918755968803	'entropy': 0.003627727183716899}. Best is trial 52 with value: -2512.79541015625. [0m
[32m[I 2022-01-14 11:45:45	861] [0m Trial 53 finished with value: -2190.788330078125 and parameters: {'r_scaling': 6.612776953003683	'unroll': 1	'update_epoch': 13	'discount': 0.9133595102274453	'lr': 0.00016294506714351124	'entropy': 0.0020370608278353587}. Best is trial 52 with value: -2512.79541015625. [0m
[32m[I 2022-01-14 11:49:13	627] [0m Trial 54 finished with value: 103.96807861328125 and parameters: {'r_scaling': 2.141563560051718	'unroll': 15	'update_epoch': 15	'discount': 0.9215363954319761	'lr': 0.000202862628686274	'entropy': 0.003239539023007601}. Best is trial 52 with value: -2512.79541015625. [0m
[32m[I 2022-01-14 11:52:25	761] [0m Trial 55 finished with value: 105.97935485839844 and parameters: {'r_scaling': 3.566480743493197	'unroll': 2	'update_epoch': 14	'discount': 0.9154872687710304	'lr': 0.00023399025586557772	'entropy': 0.006863231763501833}. Best is trial 52 with value: -2512.79541015625. [0m
[32m[I 2022-01-14 11:56:05	662] [0m Trial 56 finished with value: -2104.3466796875 and parameters: {'r_scaling': 10.960198190937673	'unroll': 1	'update_epoch': 13	'discount': 0.9293753272160837	'lr': 0.00011515107488956456	'entropy': 0.003780972454039692}. Best is trial 52 with value: -2512.79541015625. [0m
[32m[I 2022-01-14 11:59:21	978] [0m Trial 57 finished with value: 102.08387756347656 and parameters: {'r_scaling': 2.163553804500364	'unroll': 3	'update_epoch': 13	'discount': 0.9096714105172358	'lr': 0.00016998372093128834	'entropy': 0.0016620417417586057}. Best is trial 52 with value: -2512.79541015625. [0m
[32m[I 2022-01-14 12:03:07	172] [0m Trial 58 finished with value: -2315.40087890625 and parameters: {'r_scaling': 5.069655278374176	'unroll': 1	'update_epoch': 11	'discount': 0.9254969429882391	'lr': 0.0001478936942964885	'entropy': 0.008965560848888566}. Best is trial 52 with value: -2512.79541015625. [0m
[32m[I 2022-01-14 12:06:30	171] [0m Trial 59 finished with value: 96.49215698242188 and parameters: {'r_scaling': 2.8710229278894177	'unroll': 2	'update_epoch': 11	'discount': 0.9249685375132359	'lr': 0.00014821638772041033	'entropy': 0.08914995304321116}. Best is trial 52 with value: -2512.79541015625. [0m
[32m[I 2022-01-14 12:09:47	532] [0m Trial 60 finished with value: 98.82044219970703 and parameters: {'r_scaling': 7.2923028203036	'unroll': 3	'update_epoch': 12	'discount': 0.920566970333013	'lr': 0.00011031929639998505	'entropy': 0.009610923270370319}. Best is trial 52 with value: -2512.79541015625. [0m
[32m[I 2022-01-14 12:13:23	158] [0m Trial 61 finished with value: -2085.7763671875 and parameters: {'r_scaling': 4.588488216607532	'unroll': 1	'update_epoch': 11	'discount': 0.9271578251257789	'lr': 0.0002040424553401646	'entropy': 0.0051890094990090126}. Best is trial 52 with value: -2512.79541015625. [0m
[32m[I 2022-01-14 12:17:09	706] [0m Trial 62 finished with value: -2276.4677734375 and parameters: {'r_scaling': 3.5423229792069924	'unroll': 1	'update_epoch': 10	'discount': 0.9329545396610767	'lr': 0.0002536615024142621	'entropy': 0.0022833245775118302}. Best is trial 52 with value: -2512.79541015625. [0m
[32m[I 2022-01-14 12:20:01	475] [0m Trial 63 finished with value: 105.33784484863281 and parameters: {'r_scaling': 5.56552728471141	'unroll': 2	'update_epoch': 14	'discount': 0.9175560162122913	'lr': 0.00017619721667683525	'entropy': 0.001193313226800564}. Best is trial 52 with value: -2512.79541015625. [0m
[32m[I 2022-01-14 12:23:38	308] [0m Trial 64 finished with value: -2241.806396484375 and parameters: {'r_scaling': 1.8453845188002027	'unroll': 1	'update_epoch': 12	'discount': 0.9246570232951384	'lr': 0.00021863084289215398	'entropy': 0.0030553033275998514}. Best is trial 52 with value: -2512.79541015625. [0m
[32m[I 2022-01-14 12:26:29	944] [0m Trial 65 finished with value: 101.2442398071289 and parameters: {'r_scaling': 16.064804224444316	'unroll': 4	'update_epoch': 13	'discount': 0.948925150310326	'lr': 0.00013810460098808233	'entropy': 0.014605883305500642}. Best is trial 52 with value: -2512.79541015625. [0m
[32m[I 2022-01-14 12:29:48	266] [0m Trial 66 finished with value: 100.49431610107422 and parameters: {'r_scaling': 9.524307458315144	'unroll': 2	'update_epoch': 10	'discount': 0.9556627675199241	'lr': 0.00014950797366731168	'entropy': 0.006094760744813932}. Best is trial 52 with value: -2512.79541015625. [0m
[32m[I 2022-01-14 12:33:00	479] [0m Trial 67 finished with value: -2023.4775390625 and parameters: {'r_scaling': 1.2872146227408054	'unroll': 1	'update_epoch': 15	'discount': 0.9099877966357166	'lr': 0.00019122029474872846	'entropy': 0.009035757841137958}. Best is trial 52 with value: -2512.79541015625. [0m
[32m[I 2022-01-14 12:35:52	428] [0m Trial 68 finished with value: 93.84381103515625 and parameters: {'r_scaling': 0.05656699778686825	'unroll': 3	'update_epoch': 8	'discount': 0.963850264396737	'lr': 0.0002829181805745425	'entropy': 0.026504074555875362}. Best is trial 52 with value: -2512.79541015625. [0m
[32m[I 2022-01-14 12:39:11	729] [0m Trial 69 finished with value: 103.8603515625 and parameters: {'r_scaling': 4.123041717106507	'unroll': 7	'update_epoch': 6	'discount': 0.9341226707221807	'lr': 0.00012473850079453084	'entropy': 0.004653559473343082}. Best is trial 52 with value: -2512.79541015625. [0m
[32m[I 2022-01-14 12:42:48	163] [0m Trial 70 finished with value: -2284.59375 and parameters: {'r_scaling': 0.6246522544122209	'unroll': 1	'update_epoch': 12	'discount': 0.9422143287789704	'lr': 0.00024280850386649815	'entropy': 0.003479186908158337}. Best is trial 52 with value: -2512.79541015625. [0m
[32m[I 2022-01-14 12:46:29	488] [0m Trial 71 finished with value: -1793.3265380859375 and parameters: {'r_scaling': 0.25005856673119126	'unroll': 1	'update_epoch': 12	'discount': 0.941554593676912	'lr': 0.000249905537764463	'entropy': 0.0017931847418206103}. Best is trial 52 with value: -2512.79541015625. [0m
[32m[I 2022-01-14 12:49:55	658] [0m Trial 72 finished with value: 101.89265441894531 and parameters: {'r_scaling': 0.11010827110398502	'unroll': 2	'update_epoch': 11	'discount': 0.9274745165441403	'lr': 0.00020944961302178043	'entropy': 0.003457734389261673}. Best is trial 52 with value: -2512.79541015625. [0m
[32m[I 2022-01-14 12:53:01	449] [0m Trial 73 finished with value: -2336.097412109375 and parameters: {'r_scaling': 0.5754254341414279	'unroll': 1	'update_epoch': 13	'discount': 0.9185950940214885	'lr': 0.00016572683737928597	'entropy': 0.0025542540208165947}. Best is trial 52 with value: -2512.79541015625. [0m
[32m[I 2022-01-14 12:56:20	628] [0m Trial 74 finished with value: 102.4163818359375 and parameters: {'r_scaling': 0.39867276001349494	'unroll': 2	'update_epoch': 13	'discount': 0.9187916225475936	'lr': 0.00015798108697189943	'entropy': 0.002745671114523078}. Best is trial 52 with value: -2512.79541015625. [0m
[32m[I 2022-01-14 13:00:03	165] [0m Trial 75 finished with value: -2392.60205078125 and parameters: {'r_scaling': 0.5617021657528178	'unroll': 1	'update_epoch': 14	'discount': 0.9120460363471828	'lr': 0.00017577847506468846	'entropy': 0.0014222215652896228}. Best is trial 52 with value: -2512.79541015625. [0m
[32m[I 2022-01-14 13:03:25	393] [0m Trial 76 finished with value: 98.21220397949219 and parameters: {'r_scaling': 0.3010912860029724	'unroll': 2	'update_epoch': 14	'discount': 0.90548120134463	'lr': 0.00013861282811197172	'entropy': 0.0014385448485858333}. Best is trial 52 with value: -2512.79541015625. [0m
[32m[I 2022-01-14 13:07:05	145] [0m Trial 77 finished with value: -1186.2073974609375 and parameters: {'r_scaling': 0.14165203090583373	'unroll': 1	'update_epoch': 15	'discount': 0.9131871267622406	'lr': 0.00017289513615966024	'entropy': 0.011629132001061497}. Best is trial 52 with value: -2512.79541015625. [0m
[32m[I 2022-01-14 13:10:02	780] [0m Trial 78 finished with value: 107.31507110595703 and parameters: {'r_scaling': 0.7255838144841846	'unroll': 3	'update_epoch': 14	'discount': 0.901386372089395	'lr': 0.00019652234182815232	'entropy': 0.006308600810879037}. Best is trial 52 with value: -2512.79541015625. [0m
[32m[I 2022-01-14 13:13:19	858] [0m Trial 79 finished with value: 104.80657958984375 and parameters: {'r_scaling': 15.459028042434612	'unroll': 13	'update_epoch': 13	'discount': 0.922647546421747	'lr': 0.00017851204905508684	'entropy': 0.001987120148662502}. Best is trial 52 with value: -2512.79541015625. [0m
[32m[I 2022-01-14 13:17:00	920] [0m Trial 80 finished with value: -2139.114013671875 and parameters: {'r_scaling': 0.4530395615857565	'unroll': 1	'update_epoch': 14	'discount': 0.9103973476745969	'lr': 0.00015914297868251874	'entropy': 0.001117304103369978}. Best is trial 52 with value: -2512.79541015625. [0m
[32m[I 2022-01-14 13:20:49	415] [0m Trial 81 finished with value: -2428.99560546875 and parameters: {'r_scaling': 0.5714938623515836	'unroll': 1	'update_epoch': 12	'discount': 0.9469182683010905	'lr': 0.00014392769890607656	'entropy': 0.004077347193045004}. Best is trial 52 with value: -2512.79541015625. [0m
[32m[I 2022-01-14 13:24:13	100] [0m Trial 82 finished with value: 105.15751647949219 and parameters: {'r_scaling': 2.6026425111989684	'unroll': 2	'update_epoch': 13	'discount': 0.9534049368272133	'lr': 0.00014445907446318	'entropy': 0.0044813607202332136}. Best is trial 52 with value: -2512.79541015625. [0m
[32m[I 2022-01-14 13:27:51	284] [0m Trial 83 finished with value: -2313.3369140625 and parameters: {'r_scaling': 1.1185150916127762	'unroll': 1	'update_epoch': 12	'discount': 0.9478895138345397	'lr': 0.00012525433599225915	'entropy': 0.00817739722842019}. Best is trial 52 with value: -2512.79541015625. [0m
[32m[I 2022-01-14 13:31:23	131] [0m Trial 84 finished with value: 106.3630142211914 and parameters: {'r_scaling': 0.3894809820185025	'unroll': 2	'update_epoch': 9	'discount': 0.9198550521098019	'lr': 0.0001101002015193838	'entropy': 0.0008521990175141567}. Best is trial 52 with value: -2512.79541015625. [0m
[32m[I 2022-01-14 13:35:06	755] [0m Trial 85 finished with value: -1961.413330078125 and parameters: {'r_scaling': 0.7496530158332613	'unroll': 1	'update_epoch': 11	'discount': 0.9163705295484149	'lr': 0.00015668031637689208	'entropy': 0.0025345384125052875}. Best is trial 52 with value: -2512.79541015625. [0m
[32m[I 2022-01-14 13:38:31	187] [0m Trial 86 finished with value: 99.75138854980469 and parameters: {'r_scaling': 1.199371352650032	'unroll': 2	'update_epoch': 13	'discount': 0.9239602177150117	'lr': 0.00018953378130442342	'entropy': 0.005632557712291238}. Best is trial 52 with value: -2512.79541015625. [0m
[32m[I 2022-01-14 13:42:11	466] [0m Trial 87 finished with value: -2644.14501953125 and parameters: {'r_scaling': 0.4864787259929602	'unroll': 1	'update_epoch': 14	'discount': 0.9652044612226309	'lr': 0.00012815348140284726	'entropy': 0.0015752522621928615}. Best is trial 87 with value: -2644.14501953125. [0m
[32m[I 2022-01-14 13:45:34	514] [0m Trial 88 finished with value: 102.62820434570312 and parameters: {'r_scaling': 0.5090779180099043	'unroll': 3	'update_epoch': 15	'discount': 0.9728549210494581	'lr': 0.00013346519745071684	'entropy': 0.001502730745539263}. Best is trial 87 with value: -2644.14501953125. [0m
[32m[I 2022-01-14 13:48:57	960] [0m Trial 89 finished with value: 103.30827331542969 and parameters: {'r_scaling': 22.083306387117865	'unroll': 10	'update_epoch': 14	'discount': 0.9657390362963938	'lr': 0.0009031382581700334	'entropy': 0.001739988919076909}. Best is trial 87 with value: -2644.14501953125. [0m
[32m[I 2022-01-14 13:52:15	405] [0m Trial 90 finished with value: -2389.523681640625 and parameters: {'r_scaling': 0.16348867552235094	'unroll': 1	'update_epoch': 14	'discount': 0.9589968473813395	'lr': 0.00011468279445968895	'entropy': 0.0012451193144034144}. Best is trial 87 with value: -2644.14501953125. [0m
[32m[I 2022-01-14 13:55:54	245] [0m Trial 91 finished with value: -2317.07763671875 and parameters: {'r_scaling': 0.16120680667367954	'unroll': 1	'update_epoch': 14	'discount': 0.9603475144506511	'lr': 0.00011475993907283457	'entropy': 0.0011974956974989566}. Best is trial 87 with value: -2644.14501953125. [0m
[32m[I 2022-01-14 13:59:03	133] [0m Trial 92 finished with value: -2366.385986328125 and parameters: {'r_scaling': 0.09445459583590218	'unroll': 1	'update_epoch': 15	'discount': 0.9635655720758239	'lr': 0.0001013303266813074	'entropy': 0.0022023758901108747}. Best is trial 87 with value: -2644.14501953125. [0m
[32m[I 2022-01-14 14:02:17	859] [0m Trial 93 finished with value: -1966.183837890625 and parameters: {'r_scaling': 0.08731604921904954	'unroll': 1	'update_epoch': 15	'discount': 0.9636869820568924	'lr': 0.00010381155559249015	'entropy': 0.0021054807587682967}. Best is trial 87 with value: -2644.14501953125. [0m
[32m[I 2022-01-14 14:05:37	622] [0m Trial 94 finished with value: 95.42024230957031 and parameters: {'r_scaling': 0.30544482956657054	'unroll': 2	'update_epoch': 15	'discount': 0.9541380149208426	'lr': 0.00012132549306510178	'entropy': 0.0007397822712257}. Best is trial 87 with value: -2644.14501953125. [0m
[32m[I 2022-01-14 14:08:57	870] [0m Trial 95 finished with value: 90.82304382324219 and parameters: {'r_scaling': 0.07794956992032923	'unroll': 2	'update_epoch': 14	'discount': 0.9594341699201238	'lr': 0.00013104561136122658	'entropy': 0.0009297345484033664}. Best is trial 87 with value: -2644.14501953125. [0m
[32m[I 2022-01-14 14:12:41	367] [0m Trial 96 finished with value: -2189.93798828125 and parameters: {'r_scaling': 0.16689167590066745	'unroll': 1	'update_epoch': 15	'discount': 0.9572163611772683	'lr': 0.00011674345566634308	'entropy': 0.004001324854234072}. Best is trial 87 with value: -2644.14501953125. [0m
[32m[I 2022-01-14 14:16:17	096] [0m Trial 97 finished with value: 98.62332153320312 and parameters: {'r_scaling': 0.12231380037906543	'unroll': 2	'update_epoch': 7	'discount': 0.9722678951776556	'lr': 0.00010196947219153353	'entropy': 0.001410071537839183}. Best is trial 87 with value: -2644.14501953125. [0m
[32m[I 2022-01-14 14:19:58	680] [0m Trial 98 finished with value: -2540.45166015625 and parameters: {'r_scaling': 1.8026877599021645	'unroll': 1	'update_epoch': 14	'discount': 0.9652470910280153	'lr': 0.00014205313007624912	'entropy': 0.0005287143831564591}. Best is trial 87 with value: -2644.14501953125. [0m
[32m[I 2022-01-14 14:23:37	376] [0m Trial 99 finished with value: -2526.55224609375 and parameters: {'r_scaling': 1.4599858077645866	'unroll': 1	'update_epoch': 14	'discount': 0.9708453951284391	'lr': 0.00011339053747623806	'entropy': 0.00025182267804298457}. Best is trial 87 with value: -2644.14501953125. [0m
[32m[I 2022-01-14 14:27:06	528] [0m Trial 100 finished with value: 93.23246765136719 and parameters: {'r_scaling': 1.7926759050686831	'unroll': 2	'update_epoch': 14	'discount': 0.9699268593932945	'lr': 0.00040602229314736806	'entropy': 0.0005244994507863525}. Best is trial 87 with value: -2644.14501953125. [0m
[32m[I 2022-01-14 14:30:16	637] [0m Trial 101 finished with value: -2451.63720703125 and parameters: {'r_scaling': 0.8712242923718301	'unroll': 1	'update_epoch': 15	'discount': 0.9702280366641548	'lr': 0.00011088943770573509	'entropy': 0.0002365200867513945}. Best is trial 87 with value: -2644.14501953125. [0m
[32m[I 2022-01-14 14:33:26	078] [0m Trial 102 finished with value: -2608.113525390625 and parameters: {'r_scaling': 1.4656507939054506	'unroll': 1	'update_epoch': 14	'discount': 0.9773348544960507	'lr': 0.0001121291528773952	'entropy': 0.000250179255107425}. Best is trial 87 with value: -2644.14501953125. [0m
[32m[I 2022-01-14 14:37:10	251] [0m Trial 103 finished with value: -2455.29833984375 and parameters: {'r_scaling': 0.8392340527757862	'unroll': 1	'update_epoch': 13	'discount': 0.9774933316616783	'lr': 0.00010811485829543535	'entropy': 0.00022723141900902338}. Best is trial 87 with value: -2644.14501953125. [0m
[32m[I 2022-01-14 14:41:07	838] [0m Trial 104 finished with value: -2642.93017578125 and parameters: {'r_scaling': 1.4165460886351045	'unroll': 1	'update_epoch': 13	'discount': 0.9790498485115168	'lr': 0.0001067375513179796	'entropy': 0.00014663842926972585}. Best is trial 87 with value: -2644.14501953125. [0m
[32m[I 2022-01-14 14:44:03	190] [0m Trial 105 finished with value: 113.76693725585938 and parameters: {'r_scaling': 0.8875180881958588	'unroll': 2	'update_epoch': 13	'discount': 0.9825560489493399	'lr': 0.00011016432774674345	'entropy': 0.00025571423292333767}. Best is trial 87 with value: -2644.14501953125. [0m
[32m[I 2022-01-14 14:47:41	465] [0m Trial 106 finished with value: -2369.477294921875 and parameters: {'r_scaling': 2.0910310480773786	'unroll': 1	'update_epoch': 13	'discount': 0.9781517426518155	'lr': 0.0001083208352434915	'entropy': 0.0001291932359691995}. Best is trial 87 with value: -2644.14501953125. [0m
[32m[I 2022-01-14 14:51:24	016] [0m Trial 107 finished with value: -2412.183349609375 and parameters: {'r_scaling': 1.3227491910510165	'unroll': 1	'update_epoch': 12	'discount': 0.9745368929345883	'lr': 0.00012758710905431785	'entropy': 0.00017737464710136116}. Best is trial 87 with value: -2644.14501953125. [0m
[32m[I 2022-01-14 14:54:50	180] [0m Trial 108 finished with value: 106.99154663085938 and parameters: {'r_scaling': 1.6216784186862405	'unroll': 2	'update_epoch': 13	'discount': 0.9707287021608108	'lr': 0.00012033037517458909	'entropy': 0.00010036295310765257}. Best is trial 87 with value: -2644.14501953125. [0m
[32m[I 2022-01-14 14:58:10	991] [0m Trial 109 finished with value: 107.59699249267578 and parameters: {'r_scaling': 0.8464078518788325	'unroll': 3	'update_epoch': 14	'discount': 0.9760423114308285	'lr': 0.00014195370018516733	'entropy': 0.00025626826810178977}. Best is trial 87 with value: -2644.14501953125. [0m
[32m[I 2022-01-14 15:01:49	047] [0m Trial 110 finished with value: -2482.611328125 and parameters: {'r_scaling': 1.4186304048710927	'unroll': 1	'update_epoch': 12	'discount': 0.9841295060036938	'lr': 0.00012881425057949407	'entropy': 0.0003799284102066502}. Best is trial 87 with value: -2644.14501953125. [0m
[32m[I 2022-01-14 15:05:29	908] [0m Trial 111 finished with value: -2384.06103515625 and parameters: {'r_scaling': 1.051390516269081	'unroll': 1	'update_epoch': 12	'discount': 0.9861732242173497	'lr': 0.00013341905074803405	'entropy': 0.00039569176463118307}. Best is trial 87 with value: -2644.14501953125. [0m
[32m[I 2022-01-14 15:09:23	220] [0m Trial 112 finished with value: -2518.5810546875 and parameters: {'r_scaling': 1.3736823277538153	'unroll': 1	'update_epoch': 13	'discount': 0.9782884728560531	'lr': 0.00012040068364353685	'entropy': 0.00014560847270812276}. Best is trial 87 with value: -2644.14501953125. [0m
[32m[I 2022-01-14 15:13:05	473] [0m Trial 113 finished with value: -2305.62939453125 and parameters: {'r_scaling': 1.4541150308427266	'unroll': 1	'update_epoch': 13	'discount': 0.9786942549837506	'lr': 0.00011990507414171018	'entropy': 0.00018989363624722557}. Best is trial 87 with value: -2644.14501953125. [0m
[32m[I 2022-01-14 15:16:29	312] [0m Trial 114 finished with value: 100.76416015625 and parameters: {'r_scaling': 2.5412675768462774	'unroll': 2	'update_epoch': 14	'discount': 0.9830818974175719	'lr': 0.00011320072647625752	'entropy': 0.0003296780872850765}. Best is trial 87 with value: -2644.14501953125. [0m
[32m[I 2022-01-14 15:20:02	598] [0m Trial 115 finished with value: -2620.96630859375 and parameters: {'r_scaling': 3.156365084790778	'unroll': 1	'update_epoch': 13	'discount': 0.9798140418323402	'lr': 0.00010655657235984185	'entropy': 0.00013029300168852483}. Best is trial 87 with value: -2644.14501953125. [0m
[32m[I 2022-01-14 15:23:23	055] [0m Trial 116 finished with value: 106.88369750976562 and parameters: {'r_scaling': 2.965891247848049	'unroll': 2	'update_epoch': 14	'discount': 0.9855048550849063	'lr': 0.00010804139025389817	'entropy': 0.00015193092334332442}. Best is trial 87 with value: -2644.14501953125. [0m
[32m[I 2022-01-14 15:27:00	084] [0m Trial 117 finished with value: -2119.03955078125 and parameters: {'r_scaling': 1.4470084069565676	'unroll': 1	'update_epoch': 13	'discount': 0.9797435138232128	'lr': 0.00012689554678550175	'entropy': 0.00015728458784782851}. Best is trial 87 with value: -2644.14501953125. [0m
[32m[I 2022-01-14 15:30:38	257] [0m Trial 118 finished with value: -2741.87158203125 and parameters: {'r_scaling': 2.0451063501528934	'unroll': 1	'update_epoch': 15	'discount': 0.977238411763136	'lr': 0.00010010611623376241	'entropy': 0.00021593499362126037}. Best is trial 118 with value: -2741.87158203125. [0m
[32m[I 2022-01-14 15:33:55	725] [0m Trial 119 finished with value: 103.2680435180664 and parameters: {'r_scaling': 1.9462323380482285	'unroll': 2	'update_epoch': 13	'discount': 0.9769909991314942	'lr': 0.00010074993449129018	'entropy': 0.0001221390504943176}. Best is trial 118 with value: -2741.87158203125. [0m
[32m[I 2022-01-14 15:37:42	293] [0m Trial 120 finished with value: -2649.51806640625 and parameters: {'r_scaling': 3.676022904907407	'unroll': 1	'update_epoch': 14	'discount': 0.9887128483874253	'lr': 0.00010602039550504113	'entropy': 0.0002780908523074053}. Best is trial 118 with value: -2741.87158203125. [0m
[32m[I 2022-01-14 15:41:16	825] [0m Trial 121 finished with value: -2802.282958984375 and parameters: {'r_scaling': 3.4212852717726148	'unroll': 1	'update_epoch': 14	'discount': 0.9806551705209321	'lr': 0.00010034738231442864	'entropy': 0.0002831415008778299}. Best is trial 121 with value: -2802.282958984375. [0m
[32m[I 2022-01-14 15:44:51	006] [0m Trial 122 finished with value: -2530.57177734375 and parameters: {'r_scaling': 4.312602176405946	'unroll': 1	'update_epoch': 14	'discount': 0.9911534104586965	'lr': 0.00012083358985815359	'entropy': 0.00028365690713161404}. Best is trial 121 with value: -2802.282958984375. [0m
[32m[I 2022-01-14 15:48:33	122] [0m Trial 123 finished with value: -2384.5068359375 and parameters: {'r_scaling': 3.100923444760503	'unroll': 1	'update_epoch': 14	'discount': 0.9914166990146833	'lr': 0.00012043690695991744	'entropy': 0.0003169536681234574}. Best is trial 121 with value: -2802.282958984375. [0m
[32m[I 2022-01-14 15:51:51	685] [0m Trial 124 finished with value: 101.7533950805664 and parameters: {'r_scaling': 3.9504477444819934	'unroll': 2	'update_epoch': 14	'discount': 0.9890300945681426	'lr': 0.00010104818455125449	'entropy': 0.0002819398468924863}. Best is trial 121 with value: -2802.282958984375. [0m
[32m[I 2022-01-14 15:55:21	485] [0m Trial 125 finished with value: -2507.1083984375 and parameters: {'r_scaling': 2.312114690756588	'unroll': 1	'update_epoch': 15	'discount': 0.9846412309641528	'lr': 0.0001292784150255158	'entropy': 0.0004733622288886512}. Best is trial 121 with value: -2802.282958984375. [0m
[32m[I 2022-01-14 15:58:36	328] [0m Trial 126 finished with value: 109.2870864868164 and parameters: {'r_scaling': 2.3896856518851113	'unroll': 2	'update_epoch': 15	'discount': 0.9802112360338735	'lr': 0.00011729248849865254	'entropy': 0.0001631602976290191}. Best is trial 121 with value: -2802.282958984375. [0m
[32m[I 2022-01-14 16:02:12	569] [0m Trial 127 finished with value: -2669.571044921875 and parameters: {'r_scaling': 6.41009436292072	'unroll': 1	'update_epoch': 15	'discount': 0.974361454848807	'lr': 0.00010614090577504107	'entropy': 0.0001382280706916837}. Best is trial 121 with value: -2802.282958984375. [0m
[32m[I 2022-01-14 16:05:53	536] [0m Trial 128 finished with value: -2506.18212890625 and parameters: {'r_scaling': 6.156179090279345	'unroll': 1	'update_epoch': 15	'discount': 0.9884158775460218	'lr': 0.00010608769849791834	'entropy': 0.00013796467301189805}. Best is trial 121 with value: -2802.282958984375. [0m
[32m[I 2022-01-14 16:09:48	709] [0m Trial 129 finished with value: -2551.69677734375 and parameters: {'r_scaling': 3.3300782120850094	'unroll': 1	'update_epoch': 15	'discount': 0.9934243818120478	'lr': 0.0001148872021221111	'entropy': 0.00018614109270211323}. Best is trial 121 with value: -2802.282958984375. [0m
[32m[I 2022-01-14 16:12:57	817] [0m Trial 130 finished with value: -2322.181640625 and parameters: {'r_scaling': 3.3960403584400285	'unroll': 1	'update_epoch': 15	'discount': 0.9936395689909038	'lr': 0.0001063027386235148	'entropy': 0.0002139978044105734}. Best is trial 121 with value: -2802.282958984375. [0m
[32m[I 2022-01-14 16:16:04	620] [0m Trial 131 finished with value: -1901.893798828125 and parameters: {'r_scaling': 7.328658589873915	'unroll': 1	'update_epoch': 14	'discount': 0.9912497138786142	'lr': 0.00010002874373042642	'entropy': 0.00011240963840412043}. Best is trial 121 with value: -2802.282958984375. [0m
[32m[I 2022-01-14 16:19:39	744] [0m Trial 132 finished with value: -2775.27197265625 and parameters: {'r_scaling': 3.0549226320218192	'unroll': 1	'update_epoch': 15	'discount': 0.9737420879583929	'lr': 0.00011520088581245748	'entropy': 0.00018703173183122322}. Best is trial 121 with value: -2802.282958984375. [0m
[32m[I 2022-01-14 16:23:19	439] [0m Trial 133 finished with value: -2571.592041015625 and parameters: {'r_scaling': 4.288239524921253	'unroll': 1	'update_epoch': 15	'discount': 0.9737589326882663	'lr': 0.00011505938675661695	'entropy': 0.00019015503956170906}. Best is trial 121 with value: -2802.282958984375. [0m
[32m[I 2022-01-14 16:26:37	492] [0m Trial 134 finished with value: 102.17453002929688 and parameters: {'r_scaling': 4.729710442866501	'unroll': 2	'update_epoch': 15	'discount': 0.9746103696085364	'lr': 0.00011536069768316046	'entropy': 0.00018219366930971888}. Best is trial 121 with value: -2802.282958984375. [0m
[32m[I 2022-01-14 16:29:50	670] [0m Trial 135 finished with value: 97.57718658447266 and parameters: {'r_scaling': 2.945504596796311	'unroll': 7	'update_epoch': 15	'discount': 0.9717788106346674	'lr': 0.00011184340573839307	'entropy': 0.00020766983509697476}. Best is trial 121 with value: -2802.282958984375. [0m
[32m[I 2022-01-14 16:32:50	462] [0m Trial 136 finished with value: -2734.9404296875 and parameters: {'r_scaling': 3.982926563337446	'unroll': 1	'update_epoch': 15	'discount': 0.967296228856519	'lr': 0.00010678965070342656	'entropy': 0.00017282785428611574}. Best is trial 121 with value: -2802.282958984375. [0m
[32m[I 2022-01-14 16:36:32	394] [0m Trial 137 finished with value: -189.07223510742188 and parameters: {'r_scaling': 4.199747263785592	'unroll': 1	'update_epoch': 15	'discount': 0.9818615171887785	'lr': 0.001396624849876671	'entropy': 0.0002874951051043764}. Best is trial 121 with value: -2802.282958984375. [0m
[32m[I 2022-01-14 16:39:51	810] [0m Trial 138 finished with value: 91.26387023925781 and parameters: {'r_scaling': 8.54560100728311	'unroll': 2	'update_epoch': 15	'discount': 0.9666092051065432	'lr': 0.00010578722879385715	'entropy': 0.00010015524311169494}. Best is trial 121 with value: -2802.282958984375. [0m
[32m[I 2022-01-14 16:43:40	699] [0m Trial 139 finished with value: -2677.343994140625 and parameters: {'r_scaling': 3.1488734723517053	'unroll': 1	'update_epoch': 15	'discount': 0.9872112577948574	'lr': 0.00012276562751472843	'entropy': 0.00017637570574507397}. Best is trial 121 with value: -2802.282958984375. [0m
[32m[I 2022-01-14 16:47:00	284] [0m Trial 140 finished with value: 110.41410827636719 and parameters: {'r_scaling': 3.5065670945416234	'unroll': 9	'update_epoch': 15	'discount': 0.9742836674510218	'lr': 0.00013704539450844745	'entropy': 0.00016662714015949014}. Best is trial 121 with value: -2802.282958984375. [0m
[32m[I 2022-01-14 16:50:39	430] [0m Trial 141 finished with value: -2374.33642578125 and parameters: {'r_scaling': 5.92278500659812	'unroll': 1	'update_epoch': 15	'discount': 0.9947855315531334	'lr': 0.00012343026973362934	'entropy': 0.00019541299606278597}. Best is trial 121 with value: -2802.282958984375. [0m
[32m[I 2022-01-14 16:54:15	414] [0m Trial 142 finished with value: -2232.09228515625 and parameters: {'r_scaling': 5.233057872754097	'unroll': 1	'update_epoch': 14	'discount': 0.9877156626649823	'lr': 0.00010015028584569647	'entropy': 0.00012911025592807925}. Best is trial 121 with value: -2802.282958984375. [0m
[32m[I 2022-01-14 16:57:53	763] [0m Trial 143 finished with value: -2432.22900390625 and parameters: {'r_scaling': 4.01903291732234	'unroll': 1	'update_epoch': 15	'discount': 0.9924178102508159	'lr': 0.0001069262674577228	'entropy': 0.0003482869603607151}. Best is trial 121 with value: -2802.282958984375. [0m
[32m[I 2022-01-14 17:01:12	473] [0m Trial 144 finished with value: 105.00765228271484 and parameters: {'r_scaling': 2.731920921200111	'unroll': 2	'update_epoch': 14	'discount': 0.9811085998674186	'lr': 0.0019304484057534068	'entropy': 0.00022788778936313955}. Best is trial 121 with value: -2802.282958984375. [0m
[32m[I 2022-01-14 17:04:48	667] [0m Trial 145 finished with value: -2750.18310546875 and parameters: {'r_scaling': 3.386931727303752	'unroll': 1	'update_epoch': 15	'discount': 0.975999117627796	'lr': 0.00011686452904212278	'entropy': 0.00028321536604125955}. Best is trial 121 with value: -2802.282958984375. [0m
[32m[I 2022-01-14 17:08:25	228] [0m Trial 146 finished with value: -2494.56640625 and parameters: {'r_scaling': 1.8494381238951187	'unroll': 1	'update_epoch': 15	'discount': 0.9726480685869633	'lr': 0.00011390858537122424	'entropy': 0.00017993260128263712}. Best is trial 121 with value: -2802.282958984375. [0m
[32m[I 2022-01-14 17:11:59	692] [0m Trial 147 finished with value: 100.7337646484375 and parameters: {'r_scaling': 3.448075848880105	'unroll': 2	'update_epoch': 15	'discount': 0.9765430647925549	'lr': 0.00013365693457971457	'entropy': 0.00045026038031845036}. Best is trial 121 with value: -2802.282958984375. [0m
[32m[I 2022-01-14 17:15:45	657] [0m Trial 148 finished with value: -2682.434814453125 and parameters: {'r_scaling': 3.0932227702654873	'unroll': 1	'update_epoch': 15	'discount': 0.968017632063065	'lr': 0.0001247455074461768	'entropy': 0.00014605883841488414}. Best is trial 121 with value: -2802.282958984375. [0m
[32m[I 2022-01-14 17:19:55	732] [0m Trial 149 finished with value: -2565.14697265625 and parameters: {'r_scaling': 2.963685687223934	'unroll': 1	'update_epoch': 15	'discount': 0.9673205879311334	'lr': 0.0001068829457450218	'entropy': 0.0001445840969237841}. Best is trial 121 with value: -2802.282958984375. [0m
[32m[I 2022-01-14 17:23:49	297] [0m Trial 150 finished with value: 99.70549774169922 and parameters: {'r_scaling': 6.613027206465972	'unroll': 2	'update_epoch': 15	'discount': 0.9680435086412336	'lr': 0.0001001301311632314	'entropy': 0.00014179776703386246}. Best is trial 121 with value: -2802.282958984375. [0m
[32m[I 2022-01-14 17:27:40	731] [0m Trial 151 finished with value: -2522.1669921875 and parameters: {'r_scaling': 3.119627258734386	'unroll': 1	'update_epoch': 15	'discount': 0.9689590142409613	'lr': 0.00010682495538094564	'entropy': 0.00012060604010782569}. Best is trial 121 with value: -2802.282958984375. [0m
[32m[I 2022-01-14 17:31:33	727] [0m Trial 152 finished with value: -2521.845703125 and parameters: {'r_scaling': 2.794554425786861	'unroll': 1	'update_epoch': 15	'discount': 0.9754270359526824	'lr': 0.00012459495889181993	'entropy': 0.0001682805751628715}. Best is trial 121 with value: -2802.282958984375. [0m
[32m[I 2022-01-14 17:35:26	056] [0m Trial 153 finished with value: -2611.44091796875 and parameters: {'r_scaling': 3.7730599663636144	'unroll': 1	'update_epoch': 15	'discount': 0.9735661789491102	'lr': 0.00011585225126109524	'entropy': 0.00019392339118540138}. Best is trial 121 with value: -2802.282958984375. [0m
[32m[I 2022-01-14 17:38:29	830] [0m Trial 154 finished with value: -2589.21875 and parameters: {'r_scaling': 4.901066147169677	'unroll': 1	'update_epoch': 15	'discount': 0.9730736036327435	'lr': 0.00011012915765796496	'entropy': 0.00020729196118806956}. Best is trial 121 with value: -2802.282958984375. [0m
[32m[I 2022-01-14 17:42:45	228] [0m Trial 155 finished with value: 103.15290832519531 and parameters: {'r_scaling': 5.01280798870939	'unroll': 2	'update_epoch': 15	'discount': 0.9728626725083543	'lr': 0.00011761949582325431	'entropy': 0.00021588825981190717}. Best is trial 121 with value: -2802.282958984375. [0m
[32m[I 2022-01-14 17:47:05	384] [0m Trial 156 finished with value: -2380.12548828125 and parameters: {'r_scaling': 3.928131040934509	'unroll': 1	'update_epoch': 14	'discount': 0.9759406040358823	'lr': 0.00012729703531755434	'entropy': 0.00025894883761432496}. Best is trial 121 with value: -2802.282958984375. [0m
[32m[I 2022-01-14 17:51:23	219] [0m Trial 157 finished with value: -2694.4111328125 and parameters: {'r_scaling': 4.595456564879785	'unroll': 1	'update_epoch': 15	'discount': 0.9733090983774343	'lr': 0.00011341291733698311	'entropy': 0.0002057355056881277}. Best is trial 121 with value: -2802.282958984375. [0m
[32m[I 2022-01-14 17:55:20	865] [0m Trial 158 finished with value: -2499.151611328125 and parameters: {'r_scaling': 2.171123626085577	'unroll': 1	'update_epoch': 14	'discount': 0.9785288791368855	'lr': 0.00011041087045164251	'entropy': 0.00022219793787373957}. Best is trial 121 with value: -2802.282958984375. [0m
[32m[I 2022-01-14 17:59:29	687] [0m Trial 159 finished with value: 105.32527160644531 and parameters: {'r_scaling': 9.983968642907657	'unroll': 2	'update_epoch': 15	'discount': 0.9804120682376063	'lr': 0.00012244301090198674	'entropy': 0.00015484163072575953}. Best is trial 121 with value: -2802.282958984375. [0m
[32m[I 2022-01-14 18:03:52	738] [0m Trial 160 finished with value: -2513.48193359375 and parameters: {'r_scaling': 5.590491369584743	'unroll': 1	'update_epoch': 14	'discount': 0.9710021044032779	'lr': 0.00010591766635534065	'entropy': 0.00011506005386499845}. Best is trial 121 with value: -2802.282958984375. [0m
[32m[I 2022-01-14 18:07:53	002] [0m Trial 161 finished with value: -2752.066162109375 and parameters: {'r_scaling': 4.452486669164169	'unroll': 1	'update_epoch': 15	'discount': 0.9742718385826331	'lr': 0.00011467343655684938	'entropy': 0.0002022868645706587}. Best is trial 121 with value: -2802.282958984375. [0m
[32m[I 2022-01-14 18:11:41	370] [0m Trial 162 finished with value: -2591.693359375 and parameters: {'r_scaling': 7.133010525755455	'unroll': 1	'update_epoch': 15	'discount': 0.9749524242549981	'lr': 0.00010014065952999527	'entropy': 0.0002610524622526574}. Best is trial 121 with value: -2802.282958984375. [0m
[32m[I 2022-01-14 18:15:36	624] [0m Trial 163 finished with value: -2743.4013671875 and parameters: {'r_scaling': 2.5619289623259123	'unroll': 1	'update_epoch': 15	'discount': 0.9774395538468614	'lr': 0.0001344606345243808	'entropy': 0.00029228488224188043}. Best is trial 121 with value: -2802.282958984375. [0m
[32m[I 2022-01-14 18:19:22	536] [0m Trial 164 finished with value: -2349.001953125 and parameters: {'r_scaling': 3.5901801229872015	'unroll': 1	'update_epoch': 15	'discount': 0.9786618354419109	'lr': 0.0001335332946616565	'entropy': 0.0003108221132303313}. Best is trial 121 with value: -2802.282958984375. [0m
[32m[I 2022-01-14 18:23:17	848] [0m Trial 165 finished with value: 105.74793243408203 and parameters: {'r_scaling': 2.438630750001743	'unroll': 2	'update_epoch': 14	'discount': 0.9831592537144088	'lr': 0.00011991488541938937	'entropy': 0.00013721901824013315}. Best is trial 121 with value: -2802.282958984375. [0m
[32m[I 2022-01-14 18:27:14	178] [0m Trial 166 finished with value: 106.36231231689453 and parameters: {'r_scaling': 2.51126175799204	'unroll': 12	'update_epoch': 15	'discount': 0.980145741276935	'lr': 0.0001287946247831676	'entropy': 0.00023305791138234514}. Best is trial 121 with value: -2802.282958984375. [0m
[32m[I 2022-01-14 18:31:13	340] [0m Trial 167 finished with value: -2232.66650390625 and parameters: {'r_scaling': 2.059052973918833	'unroll': 1	'update_epoch': 14	'discount': 0.976876310845366	'lr': 0.00014983418725450544	'entropy': 0.00017242802268108755}. Best is trial 121 with value: -2802.282958984375. [0m
[32m[I 2022-01-14 18:34:58	756] [0m Trial 168 finished with value: -2720.84228515625 and parameters: {'r_scaling': 3.9438565402710855	'unroll': 1	'update_epoch': 15	'discount': 0.9825549640476848	'lr': 0.00011261475893178954	'entropy': 0.0003679757506226214}. Best is trial 121 with value: -2802.282958984375. [0m
[32m[I 2022-01-14 18:38:52	987] [0m Trial 169 finished with value: -2498.7705078125 and parameters: {'r_scaling': 3.7778605012092297	'unroll': 1	'update_epoch': 15	'discount': 0.9853086944096818	'lr': 0.00011888869568993565	'entropy': 0.0003661405616789962}. Best is trial 121 with value: -2802.282958984375. [0m
[32m[I 2022-01-14 18:42:43	186] [0m Trial 170 finished with value: -2619.1015625 and parameters: {'r_scaling': 2.8968224219664243	'unroll': 1	'update_epoch': 15	'discount': 0.9867791276581518	'lr': 0.0001400077265088655	'entropy': 0.00029330744880241844}. Best is trial 121 with value: -2802.282958984375. [0m
[32m[I 2022-01-14 18:46:10	781] [0m Trial 171 finished with value: -2639.083984375 and parameters: {'r_scaling': 4.614830204966197	'unroll': 1	'update_epoch': 15	'discount': 0.9820783022509385	'lr': 0.00013860450591099386	'entropy': 0.0003055201526279475}. Best is trial 121 with value: -2802.282958984375. [0m
[32m[I 2022-01-14 18:50:21	322] [0m Trial 172 finished with value: -2690.9365234375 and parameters: {'r_scaling': 4.58104065789682	'unroll': 1	'update_epoch': 15	'discount': 0.9862701450238607	'lr': 0.00013649116356065946	'entropy': 0.0003027225918053673}. Best is trial 121 with value: -2802.282958984375. [0m
[32m[I 2022-01-14 18:54:20	926] [0m Trial 173 finished with value: -2677.78125 and parameters: {'r_scaling': 4.614448489677272	'unroll': 1	'update_epoch': 15	'discount': 0.9828581673608839	'lr': 0.00013209887170359565	'entropy': 0.00042599005019441796}. Best is trial 121 with value: -2802.282958984375. [0m
[32m[I 2022-01-14 18:58:27	429] [0m Trial 174 finished with value: 105.55138397216797 and parameters: {'r_scaling': 4.608185768758718	'unroll': 2	'update_epoch': 15	'discount': 0.9852467527454636	'lr': 0.0001353813484753473	'entropy': 0.00042350119163461845}. Best is trial 121 with value: -2802.282958984375. [0m
[32m[I 2022-01-14 19:02:17	873] [0m Trial 175 finished with value: -2282.87060546875 and parameters: {'r_scaling': 5.877891374467627	'unroll': 1	'update_epoch': 15	'discount': 0.9892092129495239	'lr': 0.00015170441602248687	'entropy': 0.0003300552455951092}. Best is trial 121 with value: -2802.282958984375. [0m
[32m[I 2022-01-14 19:06:04	180] [0m Trial 176 finished with value: -2476.973388671875 and parameters: {'r_scaling': 8.355334275888445	'unroll': 1	'update_epoch': 15	'discount': 0.9830715298928139	'lr': 0.00013287995531984528	'entropy': 0.00037646829673484907}. Best is trial 121 with value: -2802.282958984375. [0m
[32m[I 2022-01-14 19:09:53	738] [0m Trial 177 finished with value: 104.7684555053711 and parameters: {'r_scaling': 5.131669019679121	'unroll': 14	'update_epoch': 15	'discount': 0.9833896243334582	'lr': 0.00012934990830233554	'entropy': 0.0002794564565169868}. Best is trial 121 with value: -2802.282958984375. [0m
[32m[I 2022-01-14 19:13:43	622] [0m Trial 178 finished with value: 100.82752227783203 and parameters: {'r_scaling': 4.436562815810349	'unroll': 2	'update_epoch': 15	'discount': 0.9862935736623423	'lr': 0.0004951461924618233	'entropy': 0.00033111255323459507}. Best is trial 121 with value: -2802.282958984375. [0m
[32m[I 2022-01-14 19:17:42	979] [0m Trial 179 finished with value: -2694.30419921875 and parameters: {'r_scaling': 7.014110134270766	'unroll': 1	'update_epoch': 15	'discount': 0.9814360973647651	'lr': 0.00014159600345137776	'entropy': 0.0006313172247415453}. Best is trial 121 with value: -2802.282958984375. [0m
[32m[I 2022-01-14 19:21:37	756] [0m Trial 180 finished with value: 101.86451721191406 and parameters: {'r_scaling': 7.652683415722474	'unroll': 2	'update_epoch': 14	'discount': 0.9814872900395407	'lr': 0.00012446453441634732	'entropy': 0.00045425145919867894}. Best is trial 121 with value: -2802.282958984375. [0m
[32m[I 2022-01-14 19:25:45	973] [0m Trial 181 finished with value: -2706.45654296875 and parameters: {'r_scaling': 5.957231810280386	'unroll': 1	'update_epoch': 15	'discount': 0.9821503604616656	'lr': 0.00014238384837536315	'entropy': 0.000530896883245475}. Best is trial 121 with value: -2802.282958984375. [0m
[32m[I 2022-01-14 19:29:46	496] [0m Trial 182 finished with value: 95.7385482788086 and parameters: {'r_scaling': 5.197646278089869	'unroll': 6	'update_epoch': 15	'discount': 0.962436066923836	'lr': 0.0001588890048878122	'entropy': 0.0006024144491586202}. Best is trial 121 with value: -2802.282958984375. [0m
[32m[I 2022-01-14 19:34:07	200] [0m Trial 183 finished with value: -2765.282470703125 and parameters: {'r_scaling': 6.767566583556579	'unroll': 1	'update_epoch': 15	'discount': 0.9791116032584946	'lr': 0.00014668630274983745	'entropy': 0.00052586339009942}. Best is trial 121 with value: -2802.282958984375. [0m
[32m[I 2022-01-14 19:37:18	744] [0m Trial 184 finished with value: -2469.56884765625 and parameters: {'r_scaling': 6.858019766669682	'unroll': 1	'update_epoch': 15	'discount': 0.9844544731165992	'lr': 0.00014686179940970873	'entropy': 0.0004989873171213061}. Best is trial 121 with value: -2802.282958984375. [0m
[32m[I 2022-01-14 19:41:27	338] [0m Trial 185 finished with value: -2390.29150390625 and parameters: {'r_scaling': 6.239378713229865	'unroll': 1	'update_epoch': 15	'discount': 0.9771091397535161	'lr': 0.00014381508157029643	'entropy': 0.0006127583021343268}. Best is trial 121 with value: -2802.282958984375. [0m
[32m[I 2022-01-14 19:45:29	517] [0m Trial 186 finished with value: -2688.2109375 and parameters: {'r_scaling': 9.505348463291138	'unroll': 1	'update_epoch': 15	'discount': 0.9873674746423935	'lr': 0.0001547053181626476	'entropy': 0.00041039537967412453}. Best is trial 121 with value: -2802.282958984375. [0m
[32m[I 2022-01-14 19:49:31	872] [0m Trial 187 finished with value: -2452.02490234375 and parameters: {'r_scaling': 12.731931669331527	'unroll': 1	'update_epoch': 15	'discount': 0.9877683606176934	'lr': 0.0001370093375299218	'entropy': 0.0004113102579863531}. Best is trial 121 with value: -2802.282958984375. [0m
[32m[I 2022-01-14 19:53:30	392] [0m Trial 188 finished with value: -2745.7373046875 and parameters: {'r_scaling': 8.8068551438721	'unroll': 1	'update_epoch': 15	'discount': 0.9815183766280506	'lr': 0.0001450749803296342	'entropy': 0.0007686122752577739}. Best is trial 121 with value: -2802.282958984375. [0m
[32m[I 2022-01-14 19:56:23	431] [0m Trial 189 finished with value: 98.92625427246094 and parameters: {'r_scaling': 9.715240429495577	'unroll': 2	'update_epoch': 15	'discount': 0.9810670442517759	'lr': 0.0001552945334725663	'entropy': 0.0005859284999667251}. Best is trial 121 with value: -2802.282958984375. [0m
[32m[I 2022-01-14 20:00:23	891] [0m Trial 190 finished with value: -2272.739501953125 and parameters: {'r_scaling': 13.347649446431946	'unroll': 1	'update_epoch': 15	'discount': 0.9787904542740299	'lr': 0.000163078669062569	'entropy': 0.0007543835261579882}. Best is trial 121 with value: -2802.282958984375. [0m
[32m[I 2022-01-14 20:04:20	207] [0m Trial 191 finished with value: -2816.24072265625 and parameters: {'r_scaling': 8.791749701070438	'unroll': 1	'update_epoch': 15	'discount': 0.9894701979157229	'lr': 0.00014859840506064386	'entropy': 0.00048095604979545573}. Best is trial 191 with value: -2816.24072265625. [0m
[32m[I 2022-01-14 20:08:16	932] [0m Trial 192 finished with value: -2440.19775390625 and parameters: {'r_scaling': 8.052751624576409	'unroll': 1	'update_epoch': 15	'discount': 0.982795575653287	'lr': 0.00014990074883730652	'entropy': 0.0004713753493234784}. Best is trial 191 with value: -2816.24072265625. [0m
[32m[I 2022-01-14 20:12:12	527] [0m Trial 193 finished with value: -2611.8310546875 and parameters: {'r_scaling': 9.433606699812	'unroll': 1	'update_epoch': 15	'discount': 0.9864562678543002	'lr': 0.00014299356969404574	'entropy': 0.0005361258737012715}. Best is trial 191 with value: -2816.24072265625. [0m
[32m[I 2022-01-14 20:15:34	849] [0m Trial 194 finished with value: -2359.640625 and parameters: {'r_scaling': 10.563613720370892	'unroll': 1	'update_epoch': 15	'discount': 0.9897556963166629	'lr': 0.00015551079557269014	'entropy': 0.0007161497920237471}. Best is trial 191 with value: -2816.24072265625. [0m
[32m[I 2022-01-14 20:19:34	351] [0m Trial 195 finished with value: -2488.258544921875 and parameters: {'r_scaling': 5.711611626842279	'unroll': 1	'update_epoch': 15	'discount': 0.9844302101512189	'lr': 0.00012682591737910614	'entropy': 0.0003773134013742569}. Best is trial 191 with value: -2816.24072265625. [0m
[32m[I 2022-01-14 20:23:29	066] [0m Trial 196 finished with value: -2828.781982421875 and parameters: {'r_scaling': 6.697746930281283	'unroll': 1	'update_epoch': 15	'discount': 0.9751254486487614	'lr': 0.00014395564027957643	'entropy': 0.0005237038494269854}. Best is trial 196 with value: -2828.781982421875. [0m
[32m[I 2022-01-14 20:27:16	286] [0m Trial 197 finished with value: -1071.0946044921875 and parameters: {'r_scaling': 7.770963775336018	'unroll': 1	'update_epoch': 2	'discount': 0.9807508378187335	'lr': 0.00017210038404211076	'entropy': 0.0005163790087480083}. Best is trial 196 with value: -2828.781982421875. [0m
[32m[I 2022-01-14 20:31:16	961] [0m Trial 198 finished with value: -2710.37646484375 and parameters: {'r_scaling': 8.844257913532658	'unroll': 1	'update_epoch': 15	'discount': 0.976153860411458	'lr': 0.00014687676598628633	'entropy': 0.000694331838630326}. Best is trial 196 with value: -2828.781982421875. [0m
[32m[I 2022-01-14 20:34:09	855] [0m Trial 199 finished with value: 97.26985168457031 and parameters: {'r_scaling': 14.19263539123474	'unroll': 2	'update_epoch': 15	'discount': 0.9757979762855895	'lr': 0.00014626329172883504	'entropy': 0.000623987588248359}. Best is trial 196 with value: -2828.781982421875. [0m
