# Supplementary material
Source: ML conference proceedings conference paper supplement (https://proceedings.neurips.cc/paper_files/paper/2022/hash/10a6bdcabbd5a3d36b760daa295f63c1-Abstract.html)
Supplement: Supplementary file 1 [file 10a6bdcabbd5a3d36b760daa295f63c1-Supplemental-Conference.zip › neurips2022/code/robotics_code/hp_searches/halfcheetah_5M.log]

[32m[I 2022-01-10 15:03:09	177] [0m A new study created in memory with name: no-name-a079a974-9cdd-4d7c-968f-c7339a259a30 [0m
[32m[I 2022-01-10 15:06:41	102] [0m Trial 0 finished with value: 101.29151916503906 and parameters: {'r_scaling': 3.512635312551581	'unroll': 12	'update_epoch': 12	'discount': 0.9275502517183006	'lr': 0.0009866971934955268	'entropy': 0.0010822265397406347}. Best is trial 0 with value: 101.29151916503906. [0m
[32m[I 2022-01-10 15:10:11	461] [0m Trial 1 finished with value: 104.47066497802734 and parameters: {'r_scaling': 30.694181705444272	'unroll': 12	'update_epoch': 1	'discount': 0.9240309303627076	'lr': 0.000860453935699639	'entropy': 0.0008762349125427017}. Best is trial 0 with value: 101.29151916503906. [0m
[32m[I 2022-01-10 15:14:18	615] [0m Trial 2 finished with value: -1956.488037109375 and parameters: {'r_scaling': 2.112642091359696	'unroll': 7	'update_epoch': 2	'discount': 0.9648140766662523	'lr': 0.0001640467330342789	'entropy': 0.009736946068022988}. Best is trial 2 with value: -1956.488037109375. [0m
[32m[I 2022-01-10 15:18:23	732] [0m Trial 3 finished with value: -1976.4859619140625 and parameters: {'r_scaling': 68.05365653622134	'unroll': 4	'update_epoch': 6	'discount': 0.9698540998997639	'lr': 0.00014063662326351694	'entropy': 0.0005100537111602522}. Best is trial 3 with value: -1976.4859619140625. [0m
[32m[I 2022-01-10 15:22:03	738] [0m Trial 4 finished with value: 105.35028076171875 and parameters: {'r_scaling': 68.57849140867374	'unroll': 14	'update_epoch': 11	'discount': 0.9647291026983822	'lr': 0.0009442279038734522	'entropy': 0.0002993321233668456}. Best is trial 3 with value: -1976.4859619140625. [0m
[32m[I 2022-01-10 15:25:33	509] [0m Trial 5 finished with value: 103.14708709716797 and parameters: {'r_scaling': 4.209717382490756	'unroll': 14	'update_epoch': 11	'discount': 0.9792761304781276	'lr': 0.0005865396510422274	'entropy': 0.008612080066920663}. Best is trial 3 with value: -1976.4859619140625. [0m
[32m[I 2022-01-10 15:30:04	537] [0m Trial 6 finished with value: -4905.068359375 and parameters: {'r_scaling': 0.3735367131080199	'unroll': 2	'update_epoch': 14	'discount': 0.9796466699588543	'lr': 0.00011549839752071396	'entropy': 0.02860873540591641}. Best is trial 6 with value: -4905.068359375. [0m
[32m[I 2022-01-10 15:34:17	756] [0m Trial 7 finished with value: -3159.602294921875 and parameters: {'r_scaling': 0.18900302575614233	'unroll': 1	'update_epoch': 2	'discount': 0.9331665953145302	'lr': 0.00010019426751853553	'entropy': 0.027572541113493217}. Best is trial 6 with value: -4905.068359375. [0m
[32m[I 2022-01-10 15:37:51	530] [0m Trial 8 finished with value: 109.46040344238281 and parameters: {'r_scaling': 1.3105986619473315	'unroll': 9	'update_epoch': 7	'discount': 0.984073934218766	'lr': 0.0005315445137543234	'entropy': 0.004667565113496808}. Best is trial 6 with value: -4905.068359375. [0m
[32m[I 2022-01-10 15:41:22	671] [0m Trial 9 finished with value: 107.975341796875 and parameters: {'r_scaling': 3.5597010305783994	'unroll': 14	'update_epoch': 8	'discount': 0.9520581732620684	'lr': 0.0019445376038098663	'entropy': 0.0021229511485746596}. Best is trial 6 with value: -4905.068359375. [0m
[32m[I 2022-01-10 15:46:07	838] [0m Trial 10 finished with value: 125.052490234375 and parameters: {'r_scaling': 0.05204392177305307	'unroll': 1	'update_epoch': 15	'discount': 0.9066436483888501	'lr': 0.00026736156184018736	'entropy': 0.08280022047815348}. Best is trial 6 with value: -4905.068359375. [0m
[32m[I 2022-01-10 15:50:26	998] [0m Trial 11 finished with value: -2371.951171875 and parameters: {'r_scaling': 0.1294016559855176	'unroll': 1	'update_epoch': 4	'discount': 0.9389309292765128	'lr': 0.00010609900001707638	'entropy': 0.049228353608562224}. Best is trial 6 with value: -4905.068359375. [0m
[32m[I 2022-01-10 15:54:47	987] [0m Trial 12 finished with value: -3258.6015625 and parameters: {'r_scaling': 0.36574576785450585	'unroll': 4	'update_epoch': 15	'discount': 0.9455375642624246	'lr': 0.0002460176549715739	'entropy': 0.024839764504632402}. Best is trial 6 with value: -4905.068359375. [0m
[32m[I 2022-01-10 15:59:06	009] [0m Trial 13 finished with value: -3817.4853515625 and parameters: {'r_scaling': 0.6356846415907564	'unroll': 4	'update_epoch': 15	'discount': 0.9936610819768369	'lr': 0.00024458868484782614	'entropy': 0.021787494237067547}. Best is trial 6 with value: -4905.068359375. [0m
[32m[I 2022-01-10 16:02:44	163] [0m Trial 14 finished with value: -2950.392578125 and parameters: {'r_scaling': 0.789660092537008	'unroll': 4	'update_epoch': 13	'discount': 0.9914373712733872	'lr': 0.00029979691751525536	'entropy': 0.01802197265100528}. Best is trial 6 with value: -4905.068359375. [0m
[32m[I 2022-01-10 16:06:32	867] [0m Trial 15 finished with value: -3119.0673828125 and parameters: {'r_scaling': 13.410252868737622	'unroll': 6	'update_epoch': 13	'discount': 0.99089451442417	'lr': 0.0001940299191119095	'entropy': 0.08838277185466185}. Best is trial 6 with value: -4905.068359375. [0m
[32m[I 2022-01-10 16:11:00	635] [0m Trial 16 finished with value: -5093.51171875 and parameters: {'r_scaling': 0.7151349213738732	'unroll': 3	'update_epoch': 10	'discount': 0.9761816098704806	'lr': 0.0003771220408774052	'entropy': 0.0001374155305316846}. Best is trial 16 with value: -5093.51171875. [0m
[32m[I 2022-01-10 16:15:19	823] [0m Trial 17 finished with value: -6503.9599609375 and parameters: {'r_scaling': 0.059704700165449605	'unroll': 3	'update_epoch': 10	'discount': 0.9571074544729528	'lr': 0.000346984361917916	'entropy': 0.00010789867224143025}. Best is trial 17 with value: -6503.9599609375. [0m
[32m[I 2022-01-10 16:18:58	127] [0m Trial 18 finished with value: 101.57371520996094 and parameters: {'r_scaling': 0.08361767139736916	'unroll': 8	'update_epoch': 9	'discount': 0.9551100895067614	'lr': 0.00039923708291170673	'entropy': 0.0001037661842511122}. Best is trial 17 with value: -6503.9599609375. [0m
[32m[I 2022-01-10 16:23:12	637] [0m Trial 19 finished with value: -3568.487548828125 and parameters: {'r_scaling': 0.2432366047931374	'unroll': 6	'update_epoch': 10	'discount': 0.9719376120945318	'lr': 0.00036879117691833083	'entropy': 0.00011422186868922882}. Best is trial 17 with value: -6503.9599609375. [0m
[32m[I 2022-01-10 16:27:34	061] [0m Trial 20 finished with value: -2668.462890625 and parameters: {'r_scaling': 11.830835905794642	'unroll': 3	'update_epoch': 6	'discount': 0.9592361507428949	'lr': 0.000689488940673674	'entropy': 0.0002696128336997116}. Best is trial 17 with value: -6503.9599609375. [0m
[32m[I 2022-01-10 16:31:56	831] [0m Trial 21 finished with value: -168.55946350097656 and parameters: {'r_scaling': 0.5433328739964794	'unroll': 2	'update_epoch': 9	'discount': 0.9780357349030165	'lr': 0.0014582011691695856	'entropy': 0.0002222412215330014}. Best is trial 17 with value: -6503.9599609375. [0m
[32m[I 2022-01-10 16:36:24	521] [0m Trial 22 finished with value: -5220.025390625 and parameters: {'r_scaling': 0.08409182150186666	'unroll': 3	'update_epoch': 13	'discount': 0.9761668929402095	'lr': 0.0003490681805982764	'entropy': 0.0023448002716595787}. Best is trial 17 with value: -6503.9599609375. [0m
[32m[I 2022-01-10 16:40:12	263] [0m Trial 23 finished with value: -3592.14404296875 and parameters: {'r_scaling': 0.05951344522723751	'unroll': 6	'update_epoch': 11	'discount': 0.9704564959552154	'lr': 0.0004600966006914938	'entropy': 0.002242873064964232}. Best is trial 17 with value: -6503.9599609375. [0m
[32m[I 2022-01-10 16:44:43	665] [0m Trial 24 finished with value: -4351.7666015625 and parameters: {'r_scaling': 0.13642416654202555	'unroll': 3	'update_epoch': 13	'discount': 0.9612324602931106	'lr': 0.00032927012194516626	'entropy': 0.00017832628437479755}. Best is trial 17 with value: -6503.9599609375. [0m
[32m[I 2022-01-10 16:48:21	686] [0m Trial 25 finished with value: -3571.014892578125 and parameters: {'r_scaling': 0.11546545037413923	'unroll': 5	'update_epoch': 9	'discount': 0.9467862182397564	'lr': 0.00021044949808167408	'entropy': 0.0005060474312207748}. Best is trial 17 with value: -6503.9599609375. [0m
[32m[I 2022-01-10 16:51:58	660] [0m Trial 26 finished with value: 101.74929809570312 and parameters: {'r_scaling': 1.2594699606384785	'unroll': 8	'update_epoch': 12	'discount': 0.973199226748552	'lr': 0.0004568170833833197	'entropy': 0.0005335947667851542}. Best is trial 17 with value: -6503.9599609375. [0m
[32m[I 2022-01-10 16:55:32	197] [0m Trial 27 finished with value: 99.69963073730469 and parameters: {'r_scaling': 0.2549253564749358	'unroll': 10	'update_epoch': 10	'discount': 0.9841751775377803	'lr': 0.0006714632793226778	'entropy': 0.0011302154504997082}. Best is trial 17 with value: -6503.9599609375. [0m
[32m[I 2022-01-10 16:59:44	168] [0m Trial 28 finished with value: -4076.72216796875 and parameters: {'r_scaling': 0.09412929869583819	'unroll': 3	'update_epoch': 7	'discount': 0.9488549191014487	'lr': 0.0003224337100545643	'entropy': 0.0001504451707771736}. Best is trial 17 with value: -6503.9599609375. [0m
[32m[I 2022-01-10 17:04:00	679] [0m Trial 29 finished with value: -1655.431640625 and parameters: {'r_scaling': 0.05008261038481112	'unroll': 5	'update_epoch': 10	'discount': 0.9145699095928171	'lr': 0.000388898982396152	'entropy': 0.001120622933755433}. Best is trial 17 with value: -6503.9599609375. [0m
[32m[I 2022-01-10 17:08:01	412] [0m Trial 30 finished with value: -2217.6474609375 and parameters: {'r_scaling': 0.20148364807290547	'unroll': 2	'update_epoch': 12	'discount': 0.9398935489573793	'lr': 0.0011963657803745202	'entropy': 0.004185049742173876}. Best is trial 17 with value: -6503.9599609375. [0m
[32m[I 2022-01-10 17:12:32	498] [0m Trial 31 finished with value: -5640.7734375 and parameters: {'r_scaling': 0.3748071890310999	'unroll': 2	'update_epoch': 14	'discount': 0.9805198206244238	'lr': 0.00020392432621975292	'entropy': 0.009154445502186895}. Best is trial 17 with value: -6503.9599609375. [0m
[32m[I 2022-01-10 17:17:04	485] [0m Trial 32 finished with value: -5302.8994140625 and parameters: {'r_scaling': 0.3610472971286547	'unroll': 2	'update_epoch': 14	'discount': 0.9857058417802307	'lr': 0.00016654411757208008	'entropy': 0.008510513783743307}. Best is trial 17 with value: -6503.9599609375. [0m
[32m[I 2022-01-10 17:21:41	654] [0m Trial 33 finished with value: -4954.08740234375 and parameters: {'r_scaling': 0.37261104950546464	'unroll': 2	'update_epoch': 14	'discount': 0.985907120757388	'lr': 0.00015934984938768056	'entropy': 0.012406938456165603}. Best is trial 17 with value: -6503.9599609375. [0m
[32m[I 2022-01-10 17:25:57	518] [0m Trial 34 finished with value: -4020.57568359375 and parameters: {'r_scaling': 0.08178612035104939	'unroll': 5	'update_epoch': 14	'discount': 0.9644895526923994	'lr': 0.00019613519337084855	'entropy': 0.00603746728574877}. Best is trial 17 with value: -6503.9599609375. [0m
[32m[I 2022-01-10 17:30:37	649] [0m Trial 35 finished with value: -5019.18896484375 and parameters: {'r_scaling': 1.921697403779659	'unroll': 1	'update_epoch': 13	'discount': 0.9881800293080287	'lr': 0.0001381313937227246	'entropy': 0.0026666543782071475}. Best is trial 17 with value: -6503.9599609375. [0m
[32m[I 2022-01-10 17:34:20	126] [0m Trial 36 finished with value: 99.35557556152344 and parameters: {'r_scaling': 6.4816417847032834	'unroll': 11	'update_epoch': 12	'discount': 0.9675360551427284	'lr': 0.00016413120750797527	'entropy': 0.008319869797819244}. Best is trial 17 with value: -6503.9599609375. [0m
[32m[I 2022-01-10 17:38:51	048] [0m Trial 37 finished with value: -4234.26318359375 and parameters: {'r_scaling': 157.23470481605847	'unroll': 2	'update_epoch': 14	'discount': 0.9809625728211434	'lr': 0.00022622789114876965	'entropy': 0.011906965500955633}. Best is trial 17 with value: -6503.9599609375. [0m
[32m[I 2022-01-10 17:42:30	386] [0m Trial 38 finished with value: -3219.669921875 and parameters: {'r_scaling': 0.16737382243615148	'unroll': 4	'update_epoch': 11	'discount': 0.9604620122663163	'lr': 0.00012731265482850704	'entropy': 0.0017116209710030135}. Best is trial 17 with value: -6503.9599609375. [0m
[32m[I 2022-01-10 17:47:02	124] [0m Trial 39 finished with value: -2787.599365234375 and parameters: {'r_scaling': 1.0126580248726602	'unroll': 3	'update_epoch': 15	'discount': 0.9227692268235865	'lr': 0.000179104853093678	'entropy': 0.004120753789599772}. Best is trial 17 with value: -6503.9599609375. [0m
[32m[I 2022-01-10 17:51:43	985] [0m Trial 40 finished with value: -6965.19921875 and parameters: {'r_scaling': 0.33170487985427244	'unroll': 1	'update_epoch': 13	'discount': 0.9759014080761041	'lr': 0.00015485169198355865	'entropy': 0.044097948755255564}. Best is trial 40 with value: -6965.19921875. [0m
[32m[I 2022-01-10 17:56:23	535] [0m Trial 41 finished with value: -6825.64794921875 and parameters: {'r_scaling': 0.301219803893017	'unroll': 1	'update_epoch': 13	'discount': 0.9748653506942178	'lr': 0.0002723541655647547	'entropy': 0.04172368949147317}. Best is trial 40 with value: -6965.19921875. [0m
[32m[I 2022-01-10 18:01:14	441] [0m Trial 42 finished with value: -6556.2109375 and parameters: {'r_scaling': 0.4457602708742451	'unroll': 1	'update_epoch': 14	'discount': 0.9822782412730557	'lr': 0.0002831466553593292	'entropy': 0.04608124908465581}. Best is trial 40 with value: -6965.19921875. [0m
[32m[I 2022-01-10 18:05:59	719] [0m Trial 43 finished with value: -5394.4892578125 and parameters: {'r_scaling': 1.9362001960304824	'unroll': 1	'update_epoch': 12	'discount': 0.9673128910283347	'lr': 0.00027916272470792047	'entropy': 0.04387441063402839}. Best is trial 40 with value: -6965.19921875. [0m
[32m[I 2022-01-10 18:10:05	432] [0m Trial 44 finished with value: -6860.8642578125 and parameters: {'r_scaling': 0.5452997872025446	'unroll': 1	'update_epoch': 12	'discount': 0.9815998500989033	'lr': 0.00026104735108619726	'entropy': 0.049444809940304056}. Best is trial 40 with value: -6965.19921875. [0m
[32m[I 2022-01-10 18:14:56	210] [0m Trial 45 finished with value: -4845.021484375 and parameters: {'r_scaling': 0.2767285533193527	'unroll': 1	'update_epoch': 11	'discount': 0.9557127777337244	'lr': 0.0002659768606618423	'entropy': 0.0501506007191295}. Best is trial 40 with value: -6965.19921875. [0m
[32m[I 2022-01-10 18:18:38	974] [0m Trial 46 finished with value: 98.19486999511719 and parameters: {'r_scaling': 1.1428924306691177	'unroll': 15	'update_epoch': 12	'discount': 0.9949411924742559	'lr': 0.00023081339240600357	'entropy': 0.03522513232529146}. Best is trial 40 with value: -6965.19921875. [0m
[32m[I 2022-01-10 18:23:11	580] [0m Trial 47 finished with value: -6694.0830078125 and parameters: {'r_scaling': 0.5311337884406403	'unroll': 1	'update_epoch': 11	'discount': 0.9817308095227542	'lr': 0.0005240935441981177	'entropy': 0.0600161766599254}. Best is trial 40 with value: -6965.19921875. [0m
[32m[I 2022-01-10 18:27:49	560] [0m Trial 48 finished with value: -5069.7119140625 and parameters: {'r_scaling': 0.4982411009497114	'unroll': 1	'update_epoch': 13	'discount': 0.9735732947013114	'lr': 0.0005616841321645147	'entropy': 0.06090971737186579}. Best is trial 40 with value: -6965.19921875. [0m
[32m[I 2022-01-10 18:32:10	361] [0m Trial 49 finished with value: -6045.3154296875 and parameters: {'r_scaling': 2.647623289188737	'unroll': 1	'update_epoch': 3	'discount': 0.9806695306174753	'lr': 0.0005060809587401769	'entropy': 0.0992568551894819}. Best is trial 40 with value: -6965.19921875. [0m
[32m[I 2022-01-10 18:35:43	846] [0m Trial 50 finished with value: 102.60198974609375 and parameters: {'r_scaling': 0.7129715968737766	'unroll': 13	'update_epoch': 15	'discount': 0.9879600693292353	'lr': 0.0008062431064349313	'entropy': 0.01885723342873886}. Best is trial 40 with value: -6965.19921875. [0m
[32m[I 2022-01-10 18:40:18	646] [0m Trial 51 finished with value: -7143.03515625 and parameters: {'r_scaling': 0.4969926823514596	'unroll': 1	'update_epoch': 11	'discount': 0.976252434648127	'lr': 0.0002986785525549235	'entropy': 0.06708008255450897}. Best is trial 51 with value: -7143.03515625. [0m
[32m[I 2022-01-10 18:44:58	338] [0m Trial 52 finished with value: -7166.9111328125 and parameters: {'r_scaling': 0.5257508718251671	'unroll': 1	'update_epoch': 11	'discount': 0.9750124777430791	'lr': 0.00029758330775548	'entropy': 0.06628518631028463}. Best is trial 52 with value: -7166.9111328125. [0m
[32m[I 2022-01-10 18:48:58	883] [0m Trial 53 finished with value: -5257.28515625 and parameters: {'r_scaling': 0.8126821235746471	'unroll': 2	'update_epoch': 11	'discount': 0.9757111975474466	'lr': 0.000307278170586714	'entropy': 0.06832148010432026}. Best is trial 52 with value: -7166.9111328125. [0m
[32m[I 2022-01-10 18:53:29	817] [0m Trial 54 finished with value: -6763.8154296875 and parameters: {'r_scaling': 1.6675430485015805	'unroll': 1	'update_epoch': 8	'discount': 0.9691128030399616	'lr': 0.00043065254746335054	'entropy': 0.03445150153374305}. Best is trial 52 with value: -7166.9111328125. [0m
[32m[I 2022-01-10 18:57:59	352] [0m Trial 55 finished with value: -5201.859375 and parameters: {'r_scaling': 4.6309596084959965	'unroll': 1	'update_epoch': 8	'discount': 0.9627996464883364	'lr': 0.00042834581812262185	'entropy': 0.03366182155546683}. Best is trial 52 with value: -7166.9111328125. [0m
[32m[I 2022-01-10 19:02:22	809] [0m Trial 56 finished with value: -5078.6865234375 and parameters: {'r_scaling': 0.8484042066457858	'unroll': 2	'update_epoch': 7	'discount': 0.9680875144569506	'lr': 0.00025654907571131554	'entropy': 0.07579643084903774}. Best is trial 52 with value: -7166.9111328125. [0m
[32m[I 2022-01-10 19:06:38	479] [0m Trial 57 finished with value: -3917.86865234375 and parameters: {'r_scaling': 1.6746937976041771	'unroll': 4	'update_epoch': 9	'discount': 0.9720875759930171	'lr': 0.00041679622915914005	'entropy': 0.03488351863202353}. Best is trial 52 with value: -7166.9111328125. [0m
[32m[I 2022-01-10 19:10:46	931] [0m Trial 58 finished with value: -4600.140625 and parameters: {'r_scaling': 1.5774684238431447	'unroll': 3	'update_epoch': 5	'discount': 0.9773328206377399	'lr': 0.0003046662130110892	'entropy': 0.02421321656101099}. Best is trial 52 with value: -7166.9111328125. [0m
[32m[I 2022-01-10 19:15:06	984] [0m Trial 59 finished with value: -5004.537109375 and parameters: {'r_scaling': 0.3040484270556338	'unroll': 2	'update_epoch': 8	'discount': 0.9911168491772716	'lr': 0.00011844567824076437	'entropy': 0.016002248658938064}. Best is trial 52 with value: -7166.9111328125. [0m
[32m[I 2022-01-10 19:19:16	041] [0m Trial 60 finished with value: -3257.3251953125 and parameters: {'r_scaling': 2.5867635754372045	'unroll': 1	'update_epoch': 1	'discount': 0.9654921800311383	'lr': 0.0002355574667583083	'entropy': 0.03031678860601817}. Best is trial 52 with value: -7166.9111328125. [0m
[32m[I 2022-01-10 19:24:00	839] [0m Trial 61 finished with value: -4408.46337890625 and parameters: {'r_scaling': 0.6406600031481526	'unroll': 1	'update_epoch': 11	'discount': 0.9744849762040992	'lr': 0.000470318966456571	'entropy': 0.05809032216223721}. Best is trial 52 with value: -7166.9111328125. [0m
[32m[I 2022-01-10 19:28:10	747] [0m Trial 62 finished with value: -6299.2587890625 and parameters: {'r_scaling': 0.18990515095612853	'unroll': 1	'update_epoch': 12	'discount': 0.978600126783248	'lr': 0.0007101124092256263	'entropy': 0.041277754458798506}. Best is trial 52 with value: -7166.9111328125. [0m
[32m[I 2022-01-10 19:32:34	144] [0m Trial 63 finished with value: -4610.796875 and parameters: {'r_scaling': 0.4914763577836145	'unroll': 2	'update_epoch': 10	'discount': 0.9699648187069363	'lr': 0.0003524997611403373	'entropy': 0.07955070637306307}. Best is trial 52 with value: -7166.9111328125. [0m
[32m[I 2022-01-10 19:36:33	179] [0m Trial 64 finished with value: -6348.3818359375 and parameters: {'r_scaling': 1.0755231050154828	'unroll': 1	'update_epoch': 9	'discount': 0.9833279506563538	'lr': 0.0005839102530271723	'entropy': 0.057127798892448754}. Best is trial 52 with value: -7166.9111328125. [0m
[32m[I 2022-01-10 19:40:16	070] [0m Trial 65 finished with value: -4102.5380859375 and parameters: {'r_scaling': 0.5470187678479745	'unroll': 7	'update_epoch': 8	'discount': 0.9884204224553637	'lr': 0.0004967717561787578	'entropy': 0.09734494398295171}. Best is trial 52 with value: -7166.9111328125. [0m
[32m[I 2022-01-10 19:44:09	515] [0m Trial 66 finished with value: -5025.8564453125 and parameters: {'r_scaling': 0.21312766525950666	'unroll': 3	'update_epoch': 13	'discount': 0.9782218119889529	'lr': 0.0003929262613591033	'entropy': 0.026620853084297756}. Best is trial 52 with value: -7166.9111328125. [0m
[32m[I 2022-01-10 19:48:41	034] [0m Trial 67 finished with value: -339.1391906738281 and parameters: {'r_scaling': 0.1492584405516096	'unroll': 2	'update_epoch': 12	'discount': 0.9011637946396022	'lr': 0.0006212925958596403	'entropy': 0.07124730742483357}. Best is trial 52 with value: -7166.9111328125. [0m
[32m[I 2022-01-10 19:53:02	521] [0m Trial 68 finished with value: -4939.9326171875 and parameters: {'r_scaling': 0.29785883963639803	'unroll': 2	'update_epoch': 10	'discount': 0.9698540006224919	'lr': 0.0002866105997994157	'entropy': 0.03837599165546937}. Best is trial 52 with value: -7166.9111328125. [0m
[32m[I 2022-01-10 19:57:13	832] [0m Trial 69 finished with value: -2775.525390625 and parameters: {'r_scaling': 0.42256457885238535	'unroll': 4	'update_epoch': 11	'discount': 0.9746616957508584	'lr': 0.00033162921129057846	'entropy': 0.020202539238772885}. Best is trial 52 with value: -7166.9111328125. [0m
[32m[I 2022-01-10 20:00:41	765] [0m Trial 70 finished with value: 108.5671157836914 and parameters: {'r_scaling': 1.3970860652538941	'unroll': 9	'update_epoch': 13	'discount': 0.9847863151992804	'lr': 0.00021569414076727216	'entropy': 0.05161626363437175}. Best is trial 52 with value: -7166.9111328125. [0m
[32m[I 2022-01-10 20:05:20	494] [0m Trial 71 finished with value: -6934.6494140625 and parameters: {'r_scaling': 0.45009951448023067	'unroll': 1	'update_epoch': 13	'discount': 0.9827117215289849	'lr': 0.00025816299288462574	'entropy': 0.04525505090905978}. Best is trial 52 with value: -7166.9111328125. [0m
[32m[I 2022-01-10 20:09:25	097] [0m Trial 72 finished with value: -5617.3408203125 and parameters: {'r_scaling': 0.8766783867565466	'unroll': 1	'update_epoch': 12	'discount': 0.9812125749515236	'lr': 0.0002503171110434858	'entropy': 0.06580246030754355}. Best is trial 52 with value: -7166.9111328125. [0m
[32m[I 2022-01-10 20:14:14	157] [0m Trial 73 finished with value: -6972.91943359375 and parameters: {'r_scaling': 0.6110765690789364	'unroll': 1	'update_epoch': 13	'discount': 0.9870000277904644	'lr': 0.00018028035385077792	'entropy': 0.03005977232343431}. Best is trial 52 with value: -7166.9111328125. [0m
[32m[I 2022-01-10 20:18:04	261] [0m Trial 74 finished with value: -4911.69873046875 and parameters: {'r_scaling': 0.3239232281101327	'unroll': 3	'update_epoch': 13	'discount': 0.9920493301886252	'lr': 0.00014405991945152532	'entropy': 0.02818883251016494}. Best is trial 52 with value: -7166.9111328125. [0m
[32m[I 2022-01-10 20:22:37	535] [0m Trial 75 finished with value: -7085.97607421875 and parameters: {'r_scaling': 0.6413129591348369	'unroll': 2	'update_epoch': 13	'discount': 0.9871669586746851	'lr': 0.00017797093820072428	'entropy': 0.04337162227504234}. Best is trial 52 with value: -7166.9111328125. [0m
[32m[I 2022-01-10 20:27:09	095] [0m Trial 76 finished with value: -6204.783203125 and parameters: {'r_scaling': 0.2558743464495985	'unroll': 2	'update_epoch': 13	'discount': 0.9881712092047333	'lr': 0.000172978005259523	'entropy': 0.04377691654773638}. Best is trial 52 with value: -7166.9111328125. [0m
[32m[I 2022-01-10 20:31:46	930] [0m Trial 77 finished with value: -5824.2998046875 and parameters: {'r_scaling': 0.6440762976726807	'unroll': 2	'update_epoch': 14	'discount': 0.9856574555587437	'lr': 0.00014994411123498327	'entropy': 0.05157090624129839}. Best is trial 52 with value: -7166.9111328125. [0m
[32m[I 2022-01-10 20:36:10	353] [0m Trial 78 finished with value: -4109.830078125 and parameters: {'r_scaling': 29.10741436816861	'unroll': 3	'update_epoch': 12	'discount': 0.9900498621639066	'lr': 0.00018512649050016593	'entropy': 0.02335273165640983}. Best is trial 52 with value: -7166.9111328125. [0m
[32m[I 2022-01-10 20:40:53	726] [0m Trial 79 finished with value: -2381.43017578125 and parameters: {'r_scaling': 0.11035407956045079	'unroll': 1	'update_epoch': 14	'discount': 0.9944545738576174	'lr': 0.00013075659125959203	'entropy': 0.07655762191078291}. Best is trial 52 with value: -7166.9111328125. [0m
[32m[I 2022-01-10 20:45:39	300] [0m Trial 80 finished with value: -1407.975341796875 and parameters: {'r_scaling': 0.2298954194612075	'unroll': 1	'update_epoch': 15	'discount': 0.9300399974295168	'lr': 0.00019122254486246348	'entropy': 0.08791606046342496}. Best is trial 52 with value: -7166.9111328125. [0m
[32m[I 2022-01-10 20:50:12	289] [0m Trial 81 finished with value: -5113.509765625 and parameters: {'r_scaling': 0.36642789050665675	'unroll': 2	'update_epoch': 13	'discount': 0.9773384532950283	'lr': 0.00021721372242616293	'entropy': 0.030051131849456642}. Best is trial 52 with value: -7166.9111328125. [0m
[32m[I 2022-01-10 20:54:56	570] [0m Trial 82 finished with value: -5088.5078125 and parameters: {'r_scaling': 0.9507948453092537	'unroll': 1	'update_epoch': 13	'discount': 0.9718794513151146	'lr': 0.00020399765039295207	'entropy': 0.01690626807856748}. Best is trial 52 with value: -7166.9111328125. [0m
[32m[I 2022-01-10 20:59:33	411] [0m Trial 83 finished with value: -4905.98095703125 and parameters: {'r_scaling': 0.6319657102005158	'unroll': 1	'update_epoch': 12	'discount': 0.9791979840184806	'lr': 0.000247633457900686	'entropy': 0.038578598546533054}. Best is trial 52 with value: -7166.9111328125. [0m
[32m[I 2022-01-10 21:04:13	297] [0m Trial 84 finished with value: -6740.1962890625 and parameters: {'r_scaling': 0.4081914042987874	'unroll': 2	'update_epoch': 14	'discount': 0.9828335642679579	'lr': 0.00010064435504722877	'entropy': 0.044061987859343954}. Best is trial 52 with value: -7166.9111328125. [0m
[32m[I 2022-01-10 21:08:54	178] [0m Trial 85 finished with value: -7603.50634765625 and parameters: {'r_scaling': 1.3433780657314704	'unroll': 1	'update_epoch': 13	'discount': 0.9864612243420173	'lr': 0.0001534381121827555	'entropy': 0.05336112305574437}. Best is trial 85 with value: -7603.50634765625. [0m
[32m[I 2022-01-10 21:13:36	725] [0m Trial 86 finished with value: -7326.54296875 and parameters: {'r_scaling': 0.6079202247061972	'unroll': 1	'update_epoch': 12	'discount': 0.9867362442866855	'lr': 0.00015441882045851558	'entropy': 0.05004353060731178}. Best is trial 85 with value: -7603.50634765625. [0m
[32m[I 2022-01-10 21:18:04	742] [0m Trial 87 finished with value: -4787.57470703125 and parameters: {'r_scaling': 1.2423825391265126	'unroll': 3	'update_epoch': 12	'discount': 0.987294558274141	'lr': 0.00012211896987399364	'entropy': 0.014161958432077165}. Best is trial 85 with value: -7603.50634765625. [0m
[32m[I 2022-01-10 21:22:32	545] [0m Trial 88 finished with value: -5080.1533203125 and parameters: {'r_scaling': 0.7437694372521702	'unroll': 2	'update_epoch': 11	'discount': 0.9915535963950958	'lr': 0.00014672776357892923	'entropy': 0.051626339626317824}. Best is trial 85 with value: -7603.50634765625. [0m
[32m[I 2022-01-10 21:27:01	515] [0m Trial 89 finished with value: -7027.138671875 and parameters: {'r_scaling': 0.5735061572749957	'unroll': 2	'update_epoch': 13	'discount': 0.984248363218278	'lr': 0.00011052502738443732	'entropy': 0.06391235440777755}. Best is trial 85 with value: -7603.50634765625. [0m
[32m[I 2022-01-10 21:31:39	852] [0m Trial 90 finished with value: -6390.43603515625 and parameters: {'r_scaling': 1.025394456733795	'unroll': 2	'update_epoch': 13	'discount': 0.9847132483440559	'lr': 0.00015249750841538136	'entropy': 0.08479295242098193}. Best is trial 85 with value: -7603.50634765625. [0m
[32m[I 2022-01-10 21:36:14	465] [0m Trial 91 finished with value: -6915.96630859375 and parameters: {'r_scaling': 0.5624723568987636	'unroll': 1	'update_epoch': 12	'discount': 0.9889577516180295	'lr': 0.00011160088114359804	'entropy': 0.06531696008058206}. Best is trial 85 with value: -7603.50634765625. [0m
[32m[I 2022-01-10 21:40:26	698] [0m Trial 92 finished with value: -5813.2275390625 and parameters: {'r_scaling': 0.5872249408013114	'unroll': 1	'update_epoch': 14	'discount': 0.9897204035364007	'lr': 0.00013506904462864708	'entropy': 0.06456696070035277}. Best is trial 85 with value: -7603.50634765625. [0m
[32m[I 2022-01-10 21:44:26	301] [0m Trial 93 finished with value: -7322.85986328125 and parameters: {'r_scaling': 0.4209833634143805	'unroll': 2	'update_epoch': 13	'discount': 0.986849028499036	'lr': 0.00011366141702366076	'entropy': 0.05757473064174035}. Best is trial 85 with value: -7603.50634765625. [0m
[32m[I 2022-01-10 21:49:01	821] [0m Trial 94 finished with value: -6867.3369140625 and parameters: {'r_scaling': 0.4413711241447049	'unroll': 2	'update_epoch': 14	'discount': 0.9862808631812241	'lr': 0.00011382202797897974	'entropy': 0.054822654656516215}. Best is trial 85 with value: -7603.50634765625. [0m
[32m[I 2022-01-10 21:53:24	959] [0m Trial 95 finished with value: -4495.46044921875 and parameters: {'r_scaling': 0.8492852947951686	'unroll': 2	'update_epoch': 13	'discount': 0.9929326893466017	'lr': 0.00015964005011179515	'entropy': 0.0317557536290409}. Best is trial 85 with value: -7603.50634765625. [0m
[32m[I 2022-01-10 21:57:55	928] [0m Trial 96 finished with value: -4792.4326171875 and parameters: {'r_scaling': 0.7051919495313905	'unroll': 3	'update_epoch': 13	'discount': 0.9852699534432688	'lr': 0.0001253617776689846	'entropy': 0.07454409128535068}. Best is trial 85 with value: -7603.50634765625. [0m
[32m[I 2022-01-10 22:03:00	587] [0m Trial 97 finished with value: -7090.8349609375 and parameters: {'r_scaling': 0.4587208711935617	'unroll': 1	'update_epoch': 15	'discount': 0.9831366073349526	'lr': 0.00017291764881797252	'entropy': 0.04013131492717877}. Best is trial 85 with value: -7603.50634765625. [0m
[32m[I 2022-01-10 22:07:02	968] [0m Trial 98 finished with value: -2914.2763671875 and parameters: {'r_scaling': 0.16342515934009857	'unroll': 2	'update_epoch': 15	'discount': 0.9797582960086006	'lr': 0.00017589185931597543	'entropy': 0.097972203237027}. Best is trial 85 with value: -7603.50634765625. [0m
[32m[I 2022-01-10 22:11:31	157] [0m Trial 99 finished with value: -4293.228515625 and parameters: {'r_scaling': 1.3942674124668561	'unroll': 3	'update_epoch': 15	'discount': 0.9934643153904812	'lr': 0.00010885332306053213	'entropy': 0.022482100937482815}. Best is trial 85 with value: -7603.50634765625. [0m
[32m[I 2022-01-10 22:15:10	182] [0m Trial 100 finished with value: 99.05585479736328 and parameters: {'r_scaling': 0.36332021510228	'unroll': 12	'update_epoch': 14	'discount': 0.9766622006472956	'lr': 0.0001676115005400755	'entropy': 0.03890652227729796}. Best is trial 85 with value: -7603.50634765625. [0m
[32m[I 2022-01-10 22:19:44	182] [0m Trial 101 finished with value: -7255.19287109375 and parameters: {'r_scaling': 0.47195220388133186	'unroll': 1	'update_epoch': 13	'discount': 0.9835891438457938	'lr': 0.0001373934929713574	'entropy': 0.057898401520545255}. Best is trial 85 with value: -7603.50634765625. [0m
[32m[I 2022-01-10 22:24:18	560] [0m Trial 102 finished with value: -7336.56103515625 and parameters: {'r_scaling': 0.27224860968292713	'unroll': 1	'update_epoch': 12	'discount': 0.9837173803259238	'lr': 0.00013683675261749235	'entropy': 0.05848833106796679}. Best is trial 85 with value: -7603.50634765625. [0m
[32m[I 2022-01-10 22:28:46	293] [0m Trial 103 finished with value: -6893.013671875 and parameters: {'r_scaling': 0.2787962054196572	'unroll': 1	'update_epoch': 11	'discount': 0.9837338518697545	'lr': 0.00013954352397815118	'entropy': 0.05999937268988632}. Best is trial 85 with value: -7603.50634765625. [0m
[32m[I 2022-01-10 22:32:37	247] [0m Trial 104 finished with value: -6934.966796875 and parameters: {'r_scaling': 0.7436055024154761	'unroll': 2	'update_epoch': 12	'discount': 0.9871676083273556	'lr': 0.00010550669288163816	'entropy': 0.08374808041867374}. Best is trial 85 with value: -7603.50634765625. [0m
[32m[I 2022-01-10 22:37:35	847] [0m Trial 105 finished with value: -7300.501953125 and parameters: {'r_scaling': 0.4939267914479693	'unroll': 1	'update_epoch': 12	'discount': 0.9895572378286155	'lr': 0.0001359323851911012	'entropy': 0.07106078506453545}. Best is trial 85 with value: -7603.50634765625. [0m
[32m[I 2022-01-10 22:42:17	285] [0m Trial 106 finished with value: -6889.1611328125 and parameters: {'r_scaling': 0.4512721220073639	'unroll': 1	'update_epoch': 11	'discount': 0.9901186711710986	'lr': 0.00013262277339517642	'entropy': 0.07422734311401784}. Best is trial 85 with value: -7603.50634765625. [0m
[32m[I 2022-01-10 22:46:47	474] [0m Trial 107 finished with value: -4067.67626953125 and parameters: {'r_scaling': 0.4823496908429269	'unroll': 2	'update_epoch': 12	'discount': 0.940040346282168	'lr': 0.00011816311913837096	'entropy': 0.06703842215447504}. Best is trial 85 with value: -7603.50634765625. [0m
[32m[I 2022-01-10 22:51:19	480] [0m Trial 108 finished with value: -6373.7646484375 and parameters: {'r_scaling': 0.3533988924423679	'unroll': 1	'update_epoch': 10	'discount': 0.9798278903463175	'lr': 0.00012522095465745953	'entropy': 0.05698244510772193}. Best is trial 85 with value: -7603.50634765625. [0m
[32m[I 2022-01-10 22:55:53	070] [0m Trial 109 finished with value: -3231.21630859375 and parameters: {'r_scaling': 0.20999337658287148	'unroll': 7	'update_epoch': 12	'discount': 0.9831259094584092	'lr': 0.00014251161677916055	'entropy': 0.09047071014208156}. Best is trial 85 with value: -7603.50634765625. [0m
[32m[I 2022-01-10 23:00:32	894] [0m Trial 110 finished with value: -6146.45458984375 and parameters: {'r_scaling': 0.40167780389922186	'unroll': 1	'update_epoch': 11	'discount': 0.9920226372059253	'lr': 0.00010012367570553084	'entropy': 0.04799184114061397}. Best is trial 85 with value: -7603.50634765625. [0m
[32m[I 2022-01-10 23:05:24	356] [0m Trial 111 finished with value: -7673.74658203125 and parameters: {'r_scaling': 0.6296983325968672	'unroll': 1	'update_epoch': 14	'discount': 0.9866220262138757	'lr': 0.0001569085057023167	'entropy': 0.036634384976088126}. Best is trial 111 with value: -7673.74658203125. [0m
[32m[I 2022-01-10 23:10:16	991] [0m Trial 112 finished with value: -7156.1728515625 and parameters: {'r_scaling': 0.5187548813091566	'unroll': 1	'update_epoch': 14	'discount': 0.985054402190892	'lr': 0.0001578557025927954	'entropy': 0.03891356969835329}. Best is trial 111 with value: -7673.74658203125. [0m
[32m[I 2022-01-10 23:15:22	133] [0m Trial 113 finished with value: -7119.5654296875 and parameters: {'r_scaling': 0.24163634661134517	'unroll': 1	'update_epoch': 15	'discount': 0.98903731429277	'lr': 0.00016155552950640196	'entropy': 0.036837721967872314}. Best is trial 111 with value: -7673.74658203125. [0m
[32m[I 2022-01-10 23:20:15	017] [0m Trial 114 finished with value: -6507.1259765625 and parameters: {'r_scaling': 0.2561439374769561	'unroll': 1	'update_epoch': 15	'discount': 0.9949029095712023	'lr': 0.00015293231679514818	'entropy': 0.034979346475038885}. Best is trial 111 with value: -7673.74658203125. [0m
[32m[I 2022-01-10 23:25:07	877] [0m Trial 115 finished with value: -6926.287109375 and parameters: {'r_scaling': 0.2334151582651242	'unroll': 1	'update_epoch': 15	'discount': 0.9899704704367986	'lr': 0.00019440237276099843	'entropy': 0.038265192343021455}. Best is trial 111 with value: -7673.74658203125. [0m
[32m[I 2022-01-10 23:30:04	615] [0m Trial 116 finished with value: -6927.7822265625 and parameters: {'r_scaling': 0.4941233141412204	'unroll': 1	'update_epoch': 15	'discount': 0.9805301876507667	'lr': 0.0001602975473834241	'entropy': 0.02662945274816071}. Best is trial 111 with value: -7673.74658203125. [0m
[32m[I 2022-01-10 23:34:54	551] [0m Trial 117 finished with value: -796.2081298828125 and parameters: {'r_scaling': 0.16666056802802623	'unroll': 1	'update_epoch': 14	'discount': 0.9815564172212806	'lr': 0.0019230809047489073	'entropy': 0.0523817555891089}. Best is trial 111 with value: -7673.74658203125. [0m
[32m[I 2022-01-10 23:39:42	758] [0m Trial 118 finished with value: -789.3671875 and parameters: {'r_scaling': 0.1250124379292391	'unroll': 1	'update_epoch': 14	'discount': 0.9890054769903999	'lr': 0.00013682475031397587	'entropy': 0.07953488277098167}. Best is trial 111 with value: -7673.74658203125. [0m
[32m[I 2022-01-10 23:44:37	005] [0m Trial 119 finished with value: -6304.10009765625 and parameters: {'r_scaling': 0.3178881623042231	'unroll': 1	'update_epoch': 14	'discount': 0.9859347234165323	'lr': 0.00017044343275917335	'entropy': 0.007018271849948257}. Best is trial 111 with value: -7673.74658203125. [0m
[32m[I 2022-01-10 23:49:15	977] [0m Trial 120 finished with value: -4463.7646484375 and parameters: {'r_scaling': 2.2705352580981057	'unroll': 2	'update_epoch': 15	'discount': 0.9912372833064973	'lr': 0.00014557675851536113	'entropy': 0.0007146525640319667}. Best is trial 111 with value: -7673.74658203125. [0m
[32m[I 2022-01-10 23:54:08	632] [0m Trial 121 finished with value: -6573.05224609375 and parameters: {'r_scaling': 0.8899702447029645	'unroll': 1	'update_epoch': 14	'discount': 0.9873779996449173	'lr': 0.00018334982743000325	'entropy': 0.04194393914859393}. Best is trial 111 with value: -7673.74658203125. [0m
[32m[I 2022-01-10 23:58:57	101] [0m Trial 122 finished with value: -5299.068359375 and parameters: {'r_scaling': 0.6818626710578324	'unroll': 2	'update_epoch': 14	'discount': 0.9842474038402058	'lr': 0.00016223627688362338	'entropy': 0.04879494353225378}. Best is trial 111 with value: -7673.74658203125. [0m
[32m[I 2022-01-11 00:02:49	702] [0m Trial 123 finished with value: 100.75312042236328 and parameters: {'r_scaling': 0.4103646088332232	'unroll': 11	'update_epoch': 15	'discount': 0.986068019455934	'lr': 0.00013125032055910882	'entropy': 0.05695125615969973}. Best is trial 111 with value: -7673.74658203125. [0m
[32m[I 2022-01-11 00:07:29	385] [0m Trial 124 finished with value: -7362.5556640625 and parameters: {'r_scaling': 1.0959796482258872	'unroll': 1	'update_epoch': 12	'discount': 0.9822427112788269	'lr': 0.000155052983104039	'entropy': 0.03510802530797599}. Best is trial 111 with value: -7673.74658203125. [0m
[32m[I 2022-01-11 00:12:28	271] [0m Trial 125 finished with value: -5402.2939453125 and parameters: {'r_scaling': 1.1204051443665168	'unroll': 1	'update_epoch': 12	'discount': 0.9782828175917151	'lr': 0.00011927151262291489	'entropy': 0.0016482413811322405}. Best is trial 111 with value: -7673.74658203125. [0m
[32m[I 2022-01-11 00:17:13	455] [0m Trial 126 finished with value: -6842.427734375 and parameters: {'r_scaling': 0.8019992725230248	'unroll': 1	'update_epoch': 11	'discount': 0.9824790103257892	'lr': 0.00015316696831652504	'entropy': 0.033912137068391586}. Best is trial 111 with value: -7673.74658203125. [0m
[32m[I 2022-01-11 00:22:01	494] [0m Trial 127 finished with value: -4576.6142578125 and parameters: {'r_scaling': 0.530940487791608	'unroll': 1	'update_epoch': 12	'discount': 0.9795077115895826	'lr': 0.0001271703583888258	'entropy': 0.03745099323997914}. Best is trial 111 with value: -7673.74658203125. [0m
[32m[I 2022-01-11 00:26:10	414] [0m Trial 128 finished with value: -5562.255859375 and parameters: {'r_scaling': 0.31395413403215827	'unroll': 1	'update_epoch': 13	'discount': 0.951684519949795	'lr': 0.0001398834914712447	'entropy': 0.02612647197548252}. Best is trial 111 with value: -7673.74658203125. [0m
[32m[I 2022-01-11 00:30:01	812] [0m Trial 129 finished with value: -5470.021484375 and parameters: {'r_scaling': 3.6615353352105755	'unroll': 2	'update_epoch': 12	'discount': 0.9732640774428196	'lr': 0.0001629295486849542	'entropy': 0.06795244728356793}. Best is trial 111 with value: -7673.74658203125. [0m
[32m[I 2022-01-11 00:34:13	255] [0m Trial 130 finished with value: -2475.2841796875 and parameters: {'r_scaling': 1.0625967210853522	'unroll': 1	'update_epoch': 13	'discount': 0.9195864770585446	'lr': 0.00019685091815043794	'entropy': 0.04771498849223311}. Best is trial 111 with value: -7673.74658203125. [0m
[32m[I 2022-01-11 00:38:59	271] [0m Trial 131 finished with value: -5195.58740234375 and parameters: {'r_scaling': 0.6342531815648101	'unroll': 2	'update_epoch': 13	'discount': 0.9885733732675835	'lr': 0.00017773189877640054	'entropy': 0.0420827914535069}. Best is trial 111 with value: -7673.74658203125. [0m
[32m[I 2022-01-11 00:43:45	474] [0m Trial 132 finished with value: -4299.66650390625 and parameters: {'r_scaling': 0.48203667656144233	'unroll': 1	'update_epoch': 2	'discount': 0.9844674960771432	'lr': 0.00014830258919796665	'entropy': 0.05632637083893535}. Best is trial 111 with value: -7673.74658203125. [0m
[32m[I 2022-01-11 00:47:36	494] [0m Trial 133 finished with value: -4998.53857421875 and parameters: {'r_scaling': 0.38287694533001587	'unroll': 2	'update_epoch': 14	'discount': 0.9923530682372579	'lr': 0.00016946375730977946	'entropy': 0.020156529511961976}. Best is trial 111 with value: -7673.74658203125. [0m
[32m[I 2022-01-11 00:51:25	899] [0m Trial 134 finished with value: -5313.82373046875 and parameters: {'r_scaling': 0.7515965405599663	'unroll': 2	'update_epoch': 10	'discount': 0.9819961774302494	'lr': 0.00015586678038884385	'entropy': 0.03147727359869906}. Best is trial 111 with value: -7673.74658203125. [0m
[32m[I 2022-01-11 00:56:36	783] [0m Trial 135 finished with value: -7491.9296875 and parameters: {'r_scaling': 0.2846589597234028	'unroll': 1	'update_epoch': 13	'discount': 0.9868816544504028	'lr': 0.00021153922962074178	'entropy': 0.04687463015632657}. Best is trial 111 with value: -7673.74658203125. [0m
[32m[I 2022-01-11 01:01:42	452] [0m Trial 136 finished with value: -969.238525390625 and parameters: {'r_scaling': 0.27289285914281247	'unroll': 1	'update_epoch': 12	'discount': 0.9903782939895008	'lr': 0.00013462371713942722	'entropy': 0.07186502650854666}. Best is trial 111 with value: -7673.74658203125. [0m
[32m[I 2022-01-11 01:06:53	106] [0m Trial 137 finished with value: -5876.6591796875 and parameters: {'r_scaling': 0.32679701869367495	'unroll': 1	'update_epoch': 13	'discount': 0.9761653708457977	'lr': 0.00018638350656882918	'entropy': 0.05867609070815986}. Best is trial 111 with value: -7673.74658203125. [0m
[32m[I 2022-01-11 01:12:02	593] [0m Trial 138 finished with value: -3197.44677734375 and parameters: {'r_scaling': 0.43533887291543916	'unroll': 1	'update_epoch': 14	'discount': 0.9850351797572612	'lr': 0.0002237504877153419	'entropy': 0.04793136509167047}. Best is trial 111 with value: -7673.74658203125. [0m
[32m[I 2022-01-11 01:17:06	183] [0m Trial 139 finished with value: -6769.9267578125 and parameters: {'r_scaling': 0.18773677782240572	'unroll': 1	'update_epoch': 11	'discount': 0.9878576508243607	'lr': 0.0001422405579850063	'entropy': 0.03719988945365343}. Best is trial 111 with value: -7673.74658203125. [0m
[32m[I 2022-01-11 01:21:26	494] [0m Trial 140 finished with value: -7235.173828125 and parameters: {'r_scaling': 0.2390938457216025	'unroll': 1	'update_epoch': 15	'discount': 0.9813108668061097	'lr': 0.00020260614207088314	'entropy': 0.02939155564121625}. Best is trial 111 with value: -7673.74658203125. [0m
[32m[I 2022-01-11 01:25:38	666] [0m Trial 141 finished with value: -7435.25 and parameters: {'r_scaling': 0.23617662306809703	'unroll': 1	'update_epoch': 15	'discount': 0.9816082952738596	'lr': 0.00020736958181241544	'entropy': 0.028597415650518616}. Best is trial 111 with value: -7673.74658203125. [0m
[32m[I 2022-01-11 01:30:12	651] [0m Trial 142 finished with value: -6009.51953125 and parameters: {'r_scaling': 0.19946477299607618	'unroll': 1	'update_epoch': 15	'discount': 0.9781223158468794	'lr': 0.00023428983690081858	'entropy': 0.031052814233793323}. Best is trial 111 with value: -7673.74658203125. [0m
[32m[I 2022-01-11 01:34:36	052] [0m Trial 143 finished with value: -6770.8291015625 and parameters: {'r_scaling': 0.2296585493013627	'unroll': 1	'update_epoch': 15	'discount': 0.9810178343651952	'lr': 0.00020010652870846302	'entropy': 0.024537206962561755}. Best is trial 111 with value: -7673.74658203125. [0m
[32m[I 2022-01-11 01:39:21	616] [0m Trial 144 finished with value: -4059.03564453125 and parameters: {'r_scaling': 0.2671526600515479	'unroll': 1	'update_epoch': 14	'discount': 0.9866833107537796	'lr': 0.00021094685792666948	'entropy': 0.00035011219221469357}. Best is trial 111 with value: -7673.74658203125. [0m
[32m[I 2022-01-11 01:43:24	401] [0m Trial 145 finished with value: -6539.9892578125 and parameters: {'r_scaling': 0.13510996965766572	'unroll': 2	'update_epoch': 13	'discount': 0.9829933096507468	'lr': 0.00012146012246837928	'entropy': 0.027824903039686856}. Best is trial 111 with value: -7673.74658203125. [0m
[32m[I 2022-01-11 01:47:52	314] [0m Trial 146 finished with value: -7444.12158203125 and parameters: {'r_scaling': 0.35443615412137774	'unroll': 1	'update_epoch': 12	'discount': 0.988788502803123	'lr': 0.00015141653115445506	'entropy': 0.05219318409309543}. Best is trial 111 with value: -7673.74658203125. [0m
[32m[I 2022-01-11 01:52:28	175] [0m Trial 147 finished with value: -6717.8486328125 and parameters: {'r_scaling': 0.3558870443743759	'unroll': 2	'update_epoch': 12	'discount': 0.9800785694696654	'lr': 0.00014665073824315531	'entropy': 0.08080572838418863}. Best is trial 111 with value: -7673.74658203125. [0m
[32m[I 2022-01-11 01:57:20	446] [0m Trial 148 finished with value: -1012.328857421875 and parameters: {'r_scaling': 0.3120358982611652	'unroll': 1	'update_epoch': 11	'discount': 0.9928684770387554	'lr': 0.0002078056157299934	'entropy': 0.06327501204581663}. Best is trial 111 with value: -7673.74658203125. [0m
[32m[I 2022-01-11 02:00:32	426] [0m Trial 149 finished with value: 108.27471923828125 and parameters: {'r_scaling': 7.323280836450839	'unroll': 9	'update_epoch': 12	'discount': 0.9754259710465505	'lr': 0.0002905082660039465	'entropy': 0.05352311166447723}. Best is trial 111 with value: -7673.74658203125. [0m
[32m[I 2022-01-11 02:04:37	673] [0m Trial 150 finished with value: -6694.24169921875 and parameters: {'r_scaling': 0.5398595922623598	'unroll': 1	'update_epoch': 12	'discount': 0.9846950577345702	'lr': 0.00013103177601063725	'entropy': 0.09820802710801271}. Best is trial 111 with value: -7673.74658203125. [0m
[32m[I 2022-01-11 02:09:50	620] [0m Trial 151 finished with value: -6396.689453125 and parameters: {'r_scaling': 0.23193523280309225	'unroll': 1	'update_epoch': 15	'discount': 0.989639683804019	'lr': 0.0001593055986521944	'entropy': 0.0457390444058652}. Best is trial 111 with value: -7673.74658203125. [0m
[32m[I 2022-01-11 02:14:13	164] [0m Trial 152 finished with value: -6058.05908203125 and parameters: {'r_scaling': 0.1923843780815253	'unroll': 1	'update_epoch': 13	'discount': 0.9868792567297081	'lr': 0.00015399994233830167	'entropy': 0.06987073811196245}. Best is trial 111 with value: -7673.74658203125. [0m
[32m[I 2022-01-11 02:19:26	965] [0m Trial 153 finished with value: -6739.208984375 and parameters: {'r_scaling': 0.2776259360567935	'unroll': 1	'update_epoch': 14	'discount': 0.988322432658666	'lr': 0.00013910583580988616	'entropy': 0.035574756793114386}. Best is trial 111 with value: -7673.74658203125. [0m
[32m[I 2022-01-11 02:24:19	472] [0m Trial 154 finished with value: -6230.0400390625 and parameters: {'r_scaling': 0.37169619636749424	'unroll': 2	'update_epoch': 12	'discount': 0.9907414027261122	'lr': 0.00016219779747108018	'entropy': 0.052101571488500024}. Best is trial 111 with value: -7673.74658203125. [0m
[32m[I 2022-01-11 02:29:20	992] [0m Trial 155 finished with value: -5277.75634765625 and parameters: {'r_scaling': 147.23371231353443	'unroll': 1	'update_epoch': 13	'discount': 0.9821025192479638	'lr': 0.00016866923388459846	'entropy': 0.042616929372850804}. Best is trial 111 with value: -7673.74658203125. [0m
[32m[I 2022-01-11 02:34:08	919] [0m Trial 156 finished with value: -5551.44677734375 and parameters: {'r_scaling': 0.17395038472544097	'unroll': 2	'update_epoch': 15	'discount': 0.9850619691022745	'lr': 0.0001837494052214016	'entropy': 0.062123405829170364}. Best is trial 111 with value: -7673.74658203125. [0m
[32m[I 2022-01-11 02:39:12	867] [0m Trial 157 finished with value: -6248.01611328125 and parameters: {'r_scaling': 0.5475579019508277	'unroll': 1	'update_epoch': 12	'discount': 0.9862140333443992	'lr': 0.0003218579029721389	'entropy': 0.03299887662123482}. Best is trial 111 with value: -7673.74658203125. [0m
[32m[I 2022-01-11 02:44:25	755] [0m Trial 158 finished with value: -5983.029296875 and parameters: {'r_scaling': 0.42405103041196424	'unroll': 1	'update_epoch': 14	'discount': 0.9773306562088478	'lr': 0.0003727916963031719	'entropy': 0.04756639560972716}. Best is trial 111 with value: -7673.74658203125. [0m
[32m[I 2022-01-11 02:49:11	286] [0m Trial 159 finished with value: -1250.70458984375 and parameters: {'r_scaling': 0.09773332295559942	'unroll': 2	'update_epoch': 5	'discount': 0.9892097390716369	'lr': 0.0001252859204559922	'entropy': 0.08275299735222368}. Best is trial 111 with value: -7673.74658203125. [0m
[32m[I 2022-01-11 02:53:18	194] [0m Trial 160 finished with value: -6956.09619140625 and parameters: {'r_scaling': 0.9427451115777562	'unroll': 1	'update_epoch': 13	'discount': 0.9834560296583439	'lr': 0.00019066719153109504	'entropy': 0.0575023267956846}. Best is trial 111 with value: -7673.74658203125. [0m
[32m[I 2022-01-11 02:58:47	075] [0m Trial 161 finished with value: -7449.3837890625 and parameters: {'r_scaling': 0.4457942639002412	'unroll': 1	'update_epoch': 15	'discount': 0.9831103324398327	'lr': 0.00014948960615951138	'entropy': 0.03953783467351424}. Best is trial 111 with value: -7673.74658203125. [0m
[32m[I 2022-01-11 03:04:36	032] [0m Trial 162 finished with value: -6680.732421875 and parameters: {'r_scaling': 0.3115526980467878	'unroll': 1	'update_epoch': 15	'discount': 0.9807805772652707	'lr': 0.00014891880146399624	'entropy': 0.040184187099504116}. Best is trial 111 with value: -7673.74658203125. [0m
[32m[I 2022-01-11 03:08:57	438] [0m Trial 163 finished with value: -7171.82568359375 and parameters: {'r_scaling': 0.6460591401812603	'unroll': 1	'update_epoch': 15	'discount': 0.9838161866584842	'lr': 0.00013251291760630905	'entropy': 0.052618365572120324}. Best is trial 111 with value: -7673.74658203125. [0m
[32m[I 2022-01-11 03:14:32	196] [0m Trial 164 finished with value: -7204.4755859375 and parameters: {'r_scaling': 0.6647177067335406	'unroll': 1	'update_epoch': 14	'discount': 0.9795936457588759	'lr': 0.00013266529987729036	'entropy': 0.06966139508072888}. Best is trial 111 with value: -7673.74658203125. [0m
[32m[I 2022-01-11 03:20:10	904] [0m Trial 165 finished with value: -7315.5546875 and parameters: {'r_scaling': 0.6810249458188621	'unroll': 1	'update_epoch': 14	'discount': 0.9785139837648501	'lr': 0.0001160066886900908	'entropy': 0.053388876118916684}. Best is trial 111 with value: -7673.74658203125. [0m
[32m[I 2022-01-11 03:25:24	797] [0m Trial 166 finished with value: -5041.9404296875 and parameters: {'r_scaling': 0.6801689748526341	'unroll': 2	'update_epoch': 14	'discount': 0.9790696819963957	'lr': 0.00012123070437424665	'entropy': 0.0525557318135215}. Best is trial 111 with value: -7673.74658203125. [0m
[32m[I 2022-01-11 03:29:48	136] [0m Trial 167 finished with value: 98.28204345703125 and parameters: {'r_scaling': 0.8554108478330742	'unroll': 15	'update_epoch': 15	'discount': 0.9817944801414585	'lr': 0.00011496707118745362	'entropy': 0.07310644960303785}. Best is trial 111 with value: -7673.74658203125. [0m
[32m[I 2022-01-11 03:35:14	536] [0m Trial 168 finished with value: -7402.267578125 and parameters: {'r_scaling': 0.6171079225381049	'unroll': 1	'update_epoch': 14	'discount': 0.9786845856916753	'lr': 0.0001046511952673129	'entropy': 0.0646058948374442}. Best is trial 111 with value: -7673.74658203125. [0m
[32m[I 2022-01-11 03:39:27	311] [0m Trial 169 finished with value: -7112.060546875 and parameters: {'r_scaling': 1.2185242234766944	'unroll': 1	'update_epoch': 14	'discount': 0.9801565537624882	'lr': 0.00010866011492898332	'entropy': 0.058343129387222796}. Best is trial 111 with value: -7673.74658203125. [0m
[32m[I 2022-01-11 03:44:44	556] [0m Trial 170 finished with value: -5387.3642578125 and parameters: {'r_scaling': 1.4263324157457233	'unroll': 2	'update_epoch': 15	'discount': 0.9837047456286394	'lr': 0.00010732971278804129	'entropy': 0.04644527680864061}. Best is trial 111 with value: -7673.74658203125. [0m
[32m[I 2022-01-11 03:50:12	692] [0m Trial 171 finished with value: -6964.642578125 and parameters: {'r_scaling': 0.5977972660068512	'unroll': 1	'update_epoch': 14	'discount': 0.9776694838766447	'lr': 0.00013101418279221782	'entropy': 0.06397036327267516}. Best is trial 111 with value: -7673.74658203125. [0m
[32m[I 2022-01-11 03:55:45	759] [0m Trial 172 finished with value: -7458.4228515625 and parameters: {'r_scaling': 0.7369135049755147	'unroll': 1	'update_epoch': 15	'discount': 0.974143163266238	'lr': 0.00011433205077420904	'entropy': 0.0881259533220143}. Best is trial 111 with value: -7673.74658203125. [0m
[32m[I 2022-01-11 04:01:00	708] [0m Trial 173 finished with value: -7680.044921875 and parameters: {'r_scaling': 0.7857187582207437	'unroll': 1	'update_epoch': 15	'discount': 0.9819781254489418	'lr': 0.00011677741265756606	'entropy': 0.0822181331358264}. Best is trial 173 with value: -7680.044921875. [0m
[32m[I 2022-01-11 04:06:06	886] [0m Trial 174 finished with value: -4786.92626953125 and parameters: {'r_scaling': 0.7576543351325469	'unroll': 1	'update_epoch': 15	'discount': 0.9730388281917451	'lr': 0.00010418031700615678	'entropy': 0.088947883812485}. Best is trial 173 with value: -7680.044921875. [0m
[32m[I 2022-01-11 04:11:05	405] [0m Trial 175 finished with value: -7432.0966796875 and parameters: {'r_scaling': 1.0337738824089804	'unroll': 1	'update_epoch': 15	'discount': 0.9787777566761362	'lr': 0.00011336536507716867	'entropy': 0.0779371890549975}. Best is trial 173 with value: -7680.044921875. [0m
[32m[I 2022-01-11 04:16:03	962] [0m Trial 176 finished with value: -7336.0390625 and parameters: {'r_scaling': 1.0129542982580955	'unroll': 1	'update_epoch': 15	'discount': 0.9817813865342623	'lr': 0.00011540451105038167	'entropy': 0.08692251102512003}. Best is trial 173 with value: -7680.044921875. [0m
[32m[I 2022-01-11 04:21:02	352] [0m Trial 177 finished with value: -7741.00048828125 and parameters: {'r_scaling': 0.9857632455967631	'unroll': 1	'update_epoch': 15	'discount': 0.9866848381389633	'lr': 0.00011262176607248913	'entropy': 0.0885945303098563}. Best is trial 177 with value: -7741.00048828125. [0m
[32m[I 2022-01-11 04:25:43	883] [0m Trial 178 finished with value: -5345.33837890625 and parameters: {'r_scaling': 1.783037222823151	'unroll': 2	'update_epoch': 15	'discount': 0.9859837736803101	'lr': 0.0001136516894923583	'entropy': 0.09891136789726719}. Best is trial 177 with value: -7741.00048828125. [0m
[32m[I 2022-01-11 04:30:47	588] [0m Trial 179 finished with value: -7421.171875 and parameters: {'r_scaling': 1.0051423904639818	'unroll': 1	'update_epoch': 15	'discount': 0.9876021289022283	'lr': 0.00011478703771064347	'entropy': 0.08553715520664992}. Best is trial 177 with value: -7741.00048828125. [0m
[32m[I 2022-01-11 04:35:52	033] [0m Trial 180 finished with value: -7850.72265625 and parameters: {'r_scaling': 1.0238307497910428	'unroll': 1	'update_epoch': 15	'discount': 0.9782055526630292	'lr': 0.0001029633837366778	'entropy': 0.08592306727644551}. Best is trial 180 with value: -7850.72265625. [0m
[32m[I 2022-01-11 04:40:24	639] [0m Trial 181 finished with value: -4016.05517578125 and parameters: {'r_scaling': 1.0040003241138935	'unroll': 5	'update_epoch': 15	'discount': 0.9778348611891619	'lr': 0.0001011695490951453	'entropy': 0.0846251368895343}. Best is trial 180 with value: -7850.72265625. [0m
[32m[I 2022-01-11 04:45:38	180] [0m Trial 182 finished with value: -7504.875 and parameters: {'r_scaling': 1.215933407177672	'unroll': 1	'update_epoch': 15	'discount': 0.9820836443672878	'lr': 0.0001141842697543009	'entropy': 0.08693377829256187}. Best is trial 180 with value: -7850.72265625. [0m
[32m[I 2022-01-11 04:50:42	735] [0m Trial 183 finished with value: -7795.6962890625 and parameters: {'r_scaling': 1.3078257950105339	'unroll': 1	'update_epoch': 15	'discount': 0.9822349570472114	'lr': 0.00010917916367864802	'entropy': 0.0848967756122401}. Best is trial 180 with value: -7850.72265625. [0m
[32m[I 2022-01-11 04:55:49	627] [0m Trial 184 finished with value: -7236.5302734375 and parameters: {'r_scaling': 1.414560767135582	'unroll': 1	'update_epoch': 15	'discount': 0.9816914686483447	'lr': 0.00010843211032531848	'entropy': 0.08638487616368445}. Best is trial 180 with value: -7850.72265625. [0m
[32m[I 2022-01-11 05:00:05	652] [0m Trial 185 finished with value: -5028.77734375 and parameters: {'r_scaling': 1.1253840790534329	'unroll': 1	'update_epoch': 15	'discount': 0.9751635149671696	'lr': 0.00010477811964965	'entropy': 0.0949067498556314}. Best is trial 180 with value: -7850.72265625. [0m
[32m[I 2022-01-11 05:05:04	023] [0m Trial 186 finished with value: -7646.103515625 and parameters: {'r_scaling': 1.6258341038164177	'unroll': 1	'update_epoch': 15	'discount': 0.9819900067686588	'lr': 0.0001185065486814649	'entropy': 0.07826246269845714}. Best is trial 180 with value: -7850.72265625. [0m
[32m[I 2022-01-11 05:09:22	260] [0m Trial 187 finished with value: -6658.8837890625 and parameters: {'r_scaling': 2.0995576391761674	'unroll': 1	'update_epoch': 15	'discount': 0.9822511298425248	'lr': 0.00011849468278978423	'entropy': 0.07852637232326143}. Best is trial 180 with value: -7850.72265625. [0m
[32m[I 2022-01-11 05:14:27	600] [0m Trial 188 finished with value: -7525.01123046875 and parameters: {'r_scaling': 1.584501660131306	'unroll': 1	'update_epoch': 15	'discount': 0.9796937601445564	'lr': 0.00011160351298300362	'entropy': 0.08649147687423044}. Best is trial 180 with value: -7850.72265625. [0m
[32m[I 2022-01-11 05:19:33	879] [0m Trial 189 finished with value: -5015.634765625 and parameters: {'r_scaling': 1.282596476973647	'unroll': 1	'update_epoch': 15	'discount': 0.9373228721650798	'lr': 0.00010909620298408055	'entropy': 0.0982016531743654}. Best is trial 180 with value: -7850.72265625. [0m
[32m[I 2022-01-11 05:24:31	364] [0m Trial 190 finished with value: -5497.60400390625 and parameters: {'r_scaling': 2.6785138305240612	'unroll': 1	'update_epoch': 15	'discount': 0.9794427895962129	'lr': 0.00012257524970437692	'entropy': 0.07418306902343502}. Best is trial 180 with value: -7850.72265625. [0m
[32m[I 2022-01-11 05:29:35	156] [0m Trial 191 finished with value: -7172.6650390625 and parameters: {'r_scaling': 1.5204668282722873	'unroll': 1	'update_epoch': 15	'discount': 0.9760312624006293	'lr': 0.00012324902635153307	'entropy': 0.08020985116815527}. Best is trial 180 with value: -7850.72265625. [0m
[32m[I 2022-01-11 05:34:53	237] [0m Trial 192 finished with value: -7693.724609375 and parameters: {'r_scaling': 1.724219180666002	'unroll': 1	'update_epoch': 15	'discount': 0.9807814364288863	'lr': 0.00011424407496730453	'entropy': 0.08611681481958809}. Best is trial 180 with value: -7850.72265625. [0m
[32m[I 2022-01-11 05:39:58	532] [0m Trial 193 finished with value: -6343.779296875 and parameters: {'r_scaling': 1.7950151492030406	'unroll': 1	'update_epoch': 15	'discount': 0.9800681490746164	'lr': 0.00010009185019926513	'entropy': 0.09924391154386344}. Best is trial 180 with value: -7850.72265625. [0m
[32m[I 2022-01-11 05:45:13	601] [0m Trial 194 finished with value: -7681.4697265625 and parameters: {'r_scaling': 1.685531103610935	'unroll': 1	'update_epoch': 15	'discount': 0.9840847038955528	'lr': 0.00011034072578313765	'entropy': 0.07839561242356946}. Best is trial 180 with value: -7850.72265625. [0m
[32m[I 2022-01-11 05:50:05	272] [0m Trial 195 finished with value: -5153.798828125 and parameters: {'r_scaling': 1.6217867777257668	'unroll': 2	'update_epoch': 15	'discount': 0.9851283628329277	'lr': 0.00010737310054716318	'entropy': 0.07851732738545578}. Best is trial 180 with value: -7850.72265625. [0m
[32m[I 2022-01-11 05:55:18	482] [0m Trial 196 finished with value: -6357.6201171875 and parameters: {'r_scaling': 2.2004921018501316	'unroll': 1	'update_epoch': 15	'discount': 0.9770988984592254	'lr': 0.00011222344785587099	'entropy': 0.0730723106861992}. Best is trial 180 with value: -7850.72265625. [0m
[32m[I 2022-01-11 06:00:31	143] [0m Trial 197 finished with value: -7437.884765625 and parameters: {'r_scaling': 1.4365728347343751	'unroll': 1	'update_epoch': 15	'discount': 0.9804898649108584	'lr': 0.00010412265589043893	'entropy': 0.0900448288040133}. Best is trial 180 with value: -7850.72265625. [0m
[32m[I 2022-01-11 06:05:16	379] [0m Trial 198 finished with value: -3871.6201171875 and parameters: {'r_scaling': 1.2277939374421045	'unroll': 6	'update_epoch': 15	'discount': 0.9796539104318864	'lr': 0.00010032555352057684	'entropy': 0.08611263085120116}. Best is trial 180 with value: -7850.72265625. [0m
[32m[I 2022-01-11 06:10:11	720] [0m Trial 199 finished with value: -7698.0595703125 and parameters: {'r_scaling': 1.362360424079416	'unroll': 1	'update_epoch': 15	'discount': 0.9740689188467091	'lr': 0.00011470509787087188	'entropy': 0.08706978336915756}. Best is trial 180 with value: -7850.72265625. [0m
