# Supplementary material
Source: ML conference proceedings conference paper supplement (https://proceedings.neurips.cc/paper_files/paper/2022/hash/10a6bdcabbd5a3d36b760daa295f63c1-Abstract.html)
Supplement: Supplementary file 1 [file 10a6bdcabbd5a3d36b760daa295f63c1-Supplemental-Conference.zip › neurips2022/code/robotics_code/hp_searches/halfcheetah_100K.log]

[32m[I 2022-01-22 20:30:13	176] [0m A new study created in memory with name: no-name-825e49d0-95e9-4327-ba43-857368d01008 [0m
[32m[I 2022-01-22 20:33:30	902] [0m Trial 0 finished with value: 106.58840942382812 and parameters: {'r_scaling': 6.2135740099051615	'unroll': 7	'update_epoch': 6	'discount': 0.9869641577416857	'lr': 0.00024385300173072433	'entropy': 0.0027189373817437675}. Best is trial 0 with value: 106.58840942382812. [0m
[32m[I 2022-01-22 20:36:51	039] [0m Trial 1 finished with value: 100.7916488647461 and parameters: {'r_scaling': 0.14965446102534527	'unroll': 5	'update_epoch': 8	'discount': 0.9572987460169092	'lr': 0.0004110091462766737	'entropy': 0.0020321130725876393}. Best is trial 1 with value: 100.7916488647461. [0m
[32m[I 2022-01-22 20:40:23	025] [0m Trial 2 finished with value: 99.72955322265625 and parameters: {'r_scaling': 27.146569747154505	'unroll': 12	'update_epoch': 7	'discount': 0.9124093783321618	'lr': 0.0004928145920776068	'entropy': 0.0005461063256448095}. Best is trial 2 with value: 99.72955322265625. [0m
[32m[I 2022-01-22 20:43:41	173] [0m Trial 3 finished with value: 102.65371704101562 and parameters: {'r_scaling': 0.41628175574494153	'unroll': 10	'update_epoch': 3	'discount': 0.9574742021432465	'lr': 0.0015933086284748309	'entropy': 0.036919718483090586}. Best is trial 2 with value: 99.72955322265625. [0m
[32m[I 2022-01-22 20:46:36	830] [0m Trial 4 finished with value: 98.40385437011719 and parameters: {'r_scaling': 1.7670681616181445	'unroll': 13	'update_epoch': 11	'discount': 0.9687783108802662	'lr': 0.0006681685139923385	'entropy': 0.06185647831067825}. Best is trial 4 with value: 98.40385437011719. [0m
[32m[I 2022-01-22 20:49:57	815] [0m Trial 5 finished with value: 105.56484985351562 and parameters: {'r_scaling': 0.1515707017962891	'unroll': 4	'update_epoch': 7	'discount': 0.9901936990404178	'lr': 0.0003294489346322581	'entropy': 0.0002443446636620527}. Best is trial 4 with value: 98.40385437011719. [0m
[32m[I 2022-01-22 20:53:16	430] [0m Trial 6 finished with value: 111.69671630859375 and parameters: {'r_scaling': 29.632137306251927	'unroll': 3	'update_epoch': 1	'discount': 0.990243886297738	'lr': 0.000363802609287026	'entropy': 0.000392297467850775}. Best is trial 4 with value: 98.40385437011719. [0m
[32m[I 2022-01-22 20:56:38	599] [0m Trial 7 finished with value: 104.6550521850586 and parameters: {'r_scaling': 93.40377496310957	'unroll': 8	'update_epoch': 13	'discount': 0.9106432288758155	'lr': 0.0011962702783965015	'entropy': 0.015948149613208607}. Best is trial 4 with value: 98.40385437011719. [0m
[32m[I 2022-01-22 21:00:01	380] [0m Trial 8 finished with value: 106.16183471679688 and parameters: {'r_scaling': 16.087383699641162	'unroll': 7	'update_epoch': 11	'discount': 0.9631011413484948	'lr': 0.001588671077369388	'entropy': 0.0015878748249019477}. Best is trial 4 with value: 98.40385437011719. [0m
[32m[I 2022-01-22 21:02:56	193] [0m Trial 9 finished with value: 96.68595886230469 and parameters: {'r_scaling': 0.2510029311341109	'unroll': 6	'update_epoch': 10	'discount': 0.950803609534921	'lr': 0.0015923541384445226	'entropy': 0.024211593644021385}. Best is trial 9 with value: 96.68595886230469. [0m
[32m[I 2022-01-22 21:06:37	266] [0m Trial 10 finished with value: -210.16473388671875 and parameters: {'r_scaling': 0.05419049300341281	'unroll': 1	'update_epoch': 15	'discount': 0.9330613855809906	'lr': 0.00010219580316791665	'entropy': 0.012610024367677304}. Best is trial 10 with value: -210.16473388671875. [0m
[32m[I 2022-01-22 21:09:45	080] [0m Trial 11 finished with value: -315.45184326171875 and parameters: {'r_scaling': 0.07905866051232649	'unroll': 1	'update_epoch': 15	'discount': 0.9321222367779122	'lr': 0.00011606942891689246	'entropy': 0.011064028094557803}. Best is trial 11 with value: -315.45184326171875. [0m
[32m[I 2022-01-22 21:13:28	179] [0m Trial 12 finished with value: 120.8472900390625 and parameters: {'r_scaling': 0.05681592340935077	'unroll': 1	'update_epoch': 15	'discount': 0.9301666516021866	'lr': 0.00011138995768409605	'entropy': 0.008978559578840247}. Best is trial 11 with value: -315.45184326171875. [0m
[32m[I 2022-01-22 21:17:15	071] [0m Trial 13 finished with value: 122.51121520996094 and parameters: {'r_scaling': 1.0274898193051418	'unroll': 1	'update_epoch': 15	'discount': 0.9321022881766828	'lr': 0.00010402379835338637	'entropy': 0.00778503460432777}. Best is trial 11 with value: -315.45184326171875. [0m
[32m[I 2022-01-22 21:20:39	666] [0m Trial 14 finished with value: 101.39207458496094 and parameters: {'r_scaling': 0.052332841968580124	'unroll': 3	'update_epoch': 13	'discount': 0.9323677619099489	'lr': 0.0001771586401073658	'entropy': 0.0077900733024402705}. Best is trial 11 with value: -315.45184326171875. [0m
[32m[I 2022-01-22 21:24:01	285] [0m Trial 15 finished with value: 95.455078125 and parameters: {'r_scaling': 0.7069451606853956	'unroll': 15	'update_epoch': 13	'discount': 0.9215947484182057	'lr': 0.00016731251154351618	'entropy': 0.0045616556952336376}. Best is trial 11 with value: -315.45184326171875. [0m
[32m[I 2022-01-22 21:27:36	929] [0m Trial 16 finished with value: 118.88363647460938 and parameters: {'r_scaling': 0.10743385134369479	'unroll': 1	'update_epoch': 15	'discount': 0.901289274914981	'lr': 0.00015116047371643412	'entropy': 0.061794364672055214}. Best is trial 11 with value: -315.45184326171875. [0m
[32m[I 2022-01-22 21:31:01	076] [0m Trial 17 finished with value: 100.50228118896484 and parameters: {'r_scaling': 4.056555720441513	'unroll': 3	'update_epoch': 10	'discount': 0.9409214530042321	'lr': 0.00022678541429362587	'entropy': 0.01626383377844369}. Best is trial 11 with value: -315.45184326171875. [0m
[32m[I 2022-01-22 21:34:22	949] [0m Trial 18 finished with value: 104.64579772949219 and parameters: {'r_scaling': 0.392574689225421	'unroll': 9	'update_epoch': 13	'discount': 0.9430749493401763	'lr': 0.00012517707301480403	'entropy': 0.0008517329298253313}. Best is trial 11 with value: -315.45184326171875. [0m
[32m[I 2022-01-22 21:37:18	067] [0m Trial 19 finished with value: 93.54669952392578 and parameters: {'r_scaling': 0.05485175704456351	'unroll': 2	'update_epoch': 4	'discount': 0.9208456294046182	'lr': 0.0007555501035915581	'entropy': 0.00011526198530493673}. Best is trial 11 with value: -315.45184326171875. [0m
[32m[I 2022-01-22 21:40:35	546] [0m Trial 20 finished with value: 106.44175720214844 and parameters: {'r_scaling': 168.40395998281886	'unroll': 5	'update_epoch': 14	'discount': 0.9738299723741368	'lr': 0.00021985008160022823	'entropy': 0.08839717832954289}. Best is trial 11 with value: -315.45184326171875. [0m
[32m[I 2022-01-22 21:43:56	913] [0m Trial 21 finished with value: 95.79931640625 and parameters: {'r_scaling': 0.0888905078392596	'unroll': 2	'update_epoch': 4	'discount': 0.9218932411563932	'lr': 0.0007988132168540387	'entropy': 0.00010642173035497094}. Best is trial 11 with value: -315.45184326171875. [0m
[32m[I 2022-01-22 21:47:15	707] [0m Trial 22 finished with value: 97.20182800292969 and parameters: {'r_scaling': 0.22827593122206122	'unroll': 2	'update_epoch': 4	'discount': 0.9203333613780339	'lr': 0.0008821825259009513	'entropy': 0.004116005379743029}. Best is trial 11 with value: -315.45184326171875. [0m
[32m[I 2022-01-22 21:50:11	873] [0m Trial 23 finished with value: 101.04560089111328 and parameters: {'r_scaling': 0.057234256960562314	'unroll': 4	'update_epoch': 5	'discount': 0.9383711020736061	'lr': 0.0005483702467837944	'entropy': 0.00011239384962903555}. Best is trial 11 with value: -315.45184326171875. [0m
[32m[I 2022-01-22 21:53:33	945] [0m Trial 24 finished with value: 103.63451385498047 and parameters: {'r_scaling': 0.10992589063349502	'unroll': 2	'update_epoch': 1	'discount': 0.9126088254168337	'lr': 0.0011120646614981686	'entropy': 0.001094554136288863}. Best is trial 11 with value: -315.45184326171875. [0m
[32m[I 2022-01-22 21:57:06	244] [0m Trial 25 finished with value: -49.24360656738281 and parameters: {'r_scaling': 0.3189853580538559	'unroll': 1	'update_epoch': 9	'discount': 0.9272744439899675	'lr': 0.0001484216267665117	'entropy': 0.012509358437965426}. Best is trial 11 with value: -315.45184326171875. [0m
[32m[I 2022-01-22 22:00:31	728] [0m Trial 26 finished with value: 101.50279235839844 and parameters: {'r_scaling': 0.7607745360589309	'unroll': 4	'update_epoch': 9	'discount': 0.9477534041199114	'lr': 0.00014318221232906245	'entropy': 0.013768774319799344}. Best is trial 11 with value: -315.45184326171875. [0m
[32m[I 2022-01-22 22:04:08	667] [0m Trial 27 finished with value: -474.49468994140625 and parameters: {'r_scaling': 0.26225937749512235	'unroll': 1	'update_epoch': 12	'discount': 0.9345550065023295	'lr': 0.00012740618971634977	'entropy': 0.0382202348626954}. Best is trial 27 with value: -474.49468994140625. [0m
[32m[I 2022-01-22 22:07:32	034] [0m Trial 28 finished with value: 105.06483459472656 and parameters: {'r_scaling': 2.1238807254485597	'unroll': 5	'update_epoch': 12	'discount': 0.9360913871494441	'lr': 0.00010436885464229074	'entropy': 0.03162765340619689}. Best is trial 27 with value: -474.49468994140625. [0m
[32m[I 2022-01-22 22:10:53	780] [0m Trial 29 finished with value: 106.60009765625 and parameters: {'r_scaling': 0.1728363875595396	'unroll': 7	'update_epoch': 14	'discount': 0.9814260073621415	'lr': 0.00026069321612356283	'entropy': 0.042629716035563814}. Best is trial 27 with value: -474.49468994140625. [0m
[32m[I 2022-01-22 22:14:12	805] [0m Trial 30 finished with value: 94.2766342163086 and parameters: {'r_scaling': 10.079181720581623	'unroll': 3	'update_epoch': 14	'discount': 0.9526425348643961	'lr': 0.00019225564033878995	'entropy': 0.02282848128723015}. Best is trial 27 with value: -474.49468994140625. [0m
[32m[I 2022-01-22 22:17:55	101] [0m Trial 31 finished with value: 121.67242431640625 and parameters: {'r_scaling': 0.29008939613006396	'unroll': 1	'update_epoch': 12	'discount': 0.9273330733301945	'lr': 0.00013938079036328102	'entropy': 0.010967175847896327}. Best is trial 27 with value: -474.49468994140625. [0m
[32m[I 2022-01-22 22:21:33	850] [0m Trial 32 finished with value: -23.388885498046875 and parameters: {'r_scaling': 0.4309881332980772	'unroll': 1	'update_epoch': 9	'discount': 0.9268751061028697	'lr': 0.00012103212465897497	'entropy': 0.005595487319134513}. Best is trial 27 with value: -474.49468994140625. [0m
[32m[I 2022-01-22 22:24:57	257] [0m Trial 33 finished with value: 97.87971496582031 and parameters: {'r_scaling': 0.09620877621029637	'unroll': 2	'update_epoch': 12	'discount': 0.9370249032086108	'lr': 0.0002697452564664804	'entropy': 0.002618713578248006}. Best is trial 27 with value: -474.49468994140625. [0m
[32m[I 2022-01-22 22:28:33	768] [0m Trial 34 finished with value: 133.19989013671875 and parameters: {'r_scaling': 0.17369496557755815	'unroll': 1	'update_epoch': 8	'discount': 0.9443547300362659	'lr': 0.0001915675716398377	'entropy': 0.023665197692577813}. Best is trial 27 with value: -474.49468994140625. [0m
[32m[I 2022-01-22 22:31:57	448] [0m Trial 35 finished with value: 99.80284881591797 and parameters: {'r_scaling': 1.3295487237501757	'unroll': 11	'update_epoch': 11	'discount': 0.9132826465922161	'lr': 0.0001291844829236364	'entropy': 0.0492578632721966}. Best is trial 27 with value: -474.49468994140625. [0m
[32m[I 2022-01-22 22:35:15	953] [0m Trial 36 finished with value: 96.04798889160156 and parameters: {'r_scaling': 0.48332052104856865	'unroll': 5	'update_epoch': 14	'discount': 0.9250427864398346	'lr': 0.00015798721022556534	'entropy': 0.006239751888067717}. Best is trial 27 with value: -474.49468994140625. [0m
[32m[I 2022-01-22 22:38:36	940] [0m Trial 37 finished with value: 107.964599609375 and parameters: {'r_scaling': 0.0860248974937068	'unroll': 3	'update_epoch': 7	'discount': 0.9176026228254008	'lr': 0.0003139482216444654	'entropy': 0.09519565388520168}. Best is trial 27 with value: -474.49468994140625. [0m
[32m[I 2022-01-22 22:41:57	169] [0m Trial 38 finished with value: 103.49594116210938 and parameters: {'r_scaling': 0.13926477737922396	'unroll': 4	'update_epoch': 15	'discount': 0.9334597713129611	'lr': 0.00010003673781760302	'entropy': 0.0034188141868936543}. Best is trial 27 with value: -474.49468994140625. [0m
[32m[I 2022-01-22 22:45:15	147] [0m Trial 39 finished with value: 101.11148071289062 and parameters: {'r_scaling': 0.2831822128422708	'unroll': 2	'update_epoch': 10	'discount': 0.9572098237692732	'lr': 0.0001251089554960866	'entropy': 0.011562534315657501}. Best is trial 27 with value: -474.49468994140625. [0m
[32m[I 2022-01-22 22:48:37	321] [0m Trial 40 finished with value: 102.58138275146484 and parameters: {'r_scaling': 3.2024713451879503	'unroll': 13	'update_epoch': 11	'discount': 0.9047259693294483	'lr': 0.0004497606668997017	'entropy': 0.030684727768438634}. Best is trial 27 with value: -474.49468994140625. [0m
[32m[I 2022-01-22 22:52:14	823] [0m Trial 41 finished with value: 114.90198516845703 and parameters: {'r_scaling': 0.5160408382550649	'unroll': 1	'update_epoch': 8	'discount': 0.9264582690156533	'lr': 0.00011940376008308143	'entropy': 0.005539385052273829}. Best is trial 27 with value: -474.49468994140625. [0m
[32m[I 2022-01-22 22:55:19	287] [0m Trial 42 finished with value: -136.2117156982422 and parameters: {'r_scaling': 0.36327418598125233	'unroll': 1	'update_epoch': 9	'discount': 0.9283827573514994	'lr': 0.00014343672123208156	'entropy': 0.018913169547046204}. Best is trial 27 with value: -474.49468994140625. [0m
[32m[I 2022-01-22 22:58:46	193] [0m Trial 43 finished with value: 101.07456970214844 and parameters: {'r_scaling': 0.1900864999619587	'unroll': 2	'update_epoch': 9	'discount': 0.9404394224982081	'lr': 0.0001910515164294254	'entropy': 0.018261530225440137}. Best is trial 27 with value: -474.49468994140625. [0m
[32m[I 2022-01-22 23:02:07	016] [0m Trial 44 finished with value: 99.98046875 and parameters: {'r_scaling': 0.07487945099112857	'unroll': 3	'update_epoch': 7	'discount': 0.9311126097598824	'lr': 0.00014667907999543233	'entropy': 0.01078398109881485}. Best is trial 27 with value: -474.49468994140625. [0m
[32m[I 2022-01-22 23:05:44	338] [0m Trial 45 finished with value: -304.02276611328125 and parameters: {'r_scaling': 0.13440299182728482	'unroll': 1	'update_epoch': 12	'discount': 0.9347695374802697	'lr': 0.00017243248961728753	'entropy': 0.017440818510277685}. Best is trial 27 with value: -474.49468994140625. [0m
[32m[I 2022-01-22 23:09:11	999] [0m Trial 46 finished with value: 96.74585723876953 and parameters: {'r_scaling': 0.15504363475681954	'unroll': 4	'update_epoch': 12	'discount': 0.9480305801369524	'lr': 0.0001159094839929438	'entropy': 0.02007299096203953}. Best is trial 27 with value: -474.49468994140625. [0m
[32m[I 2022-01-22 23:12:48	193] [0m Trial 47 finished with value: -35.94632339477539 and parameters: {'r_scaling': 0.11676407912534514	'unroll': 1	'update_epoch': 13	'discount': 0.9367901227781549	'lr': 0.0001017337377104947	'entropy': 0.03205729588848026}. Best is trial 27 with value: -474.49468994140625. [0m
[32m[I 2022-01-22 23:16:11	564] [0m Trial 48 finished with value: 106.08665466308594 and parameters: {'r_scaling': 0.07571751327305483	'unroll': 3	'update_epoch': 15	'discount': 0.9334584271367851	'lr': 0.0002152561162166899	'entropy': 0.060563380294287164}. Best is trial 27 with value: -474.49468994140625. [0m
[32m[I 2022-01-22 23:19:35	213] [0m Trial 49 finished with value: 98.5463638305664 and parameters: {'r_scaling': 34.41921757427217	'unroll': 8	'update_epoch': 14	'discount': 0.9175021990306177	'lr': 0.0001714655526633112	'entropy': 0.04509976163359856}. Best is trial 27 with value: -474.49468994140625. [0m
[32m[I 2022-01-22 23:22:55	007] [0m Trial 50 finished with value: 103.56767272949219 and parameters: {'r_scaling': 0.7638084129874478	'unroll': 2	'update_epoch': 10	'discount': 0.9541116117443846	'lr': 0.00013448975717338866	'entropy': 0.00752469890823815}. Best is trial 27 with value: -474.49468994140625. [0m
[32m[I 2022-01-22 23:26:30	331] [0m Trial 51 finished with value: -500.1933288574219 and parameters: {'r_scaling': 0.31083410893658703	'unroll': 1	'update_epoch': 9	'discount': 0.9297705996548117	'lr': 0.0001622768049516475	'entropy': 0.014170404253766268}. Best is trial 51 with value: -500.1933288574219. [0m
[32m[I 2022-01-22 23:30:12	623] [0m Trial 52 finished with value: -408.36865234375 and parameters: {'r_scaling': 0.1290295877725194	'unroll': 1	'update_epoch': 6	'discount': 0.9420647159745893	'lr': 0.00016430581541013737	'entropy': 0.01724464824997511}. Best is trial 51 with value: -500.1933288574219. [0m
[32m[I 2022-01-22 23:33:39	757] [0m Trial 53 finished with value: 106.8532943725586 and parameters: {'r_scaling': 0.06921017210477426	'unroll': 6	'update_epoch': 6	'discount': 0.9437002896894301	'lr': 0.0001685547536564527	'entropy': 0.009267502816460538}. Best is trial 51 with value: -500.1933288574219. [0m
[32m[I 2022-01-22 23:37:03	409] [0m Trial 54 finished with value: 105.04971313476562 and parameters: {'r_scaling': 0.12560287399971595	'unroll': 2	'update_epoch': 6	'discount': 0.9402269327761296	'lr': 0.00011312365643479558	'entropy': 0.015466811560105103}. Best is trial 51 with value: -500.1933288574219. [0m
[32m[I 2022-01-22 23:40:34	823] [0m Trial 55 finished with value: 132.92076110839844 and parameters: {'r_scaling': 0.24354228921303395	'unroll': 1	'update_epoch': 5	'discount': 0.9338348929414534	'lr': 0.00023449566796048205	'entropy': 0.023676355721617172}. Best is trial 51 with value: -500.1933288574219. [0m
[32m[I 2022-01-22 23:43:56	667] [0m Trial 56 finished with value: 100.80940246582031 and parameters: {'r_scaling': 0.05015569951254195	'unroll': 3	'update_epoch': 15	'discount': 0.9482454466377073	'lr': 0.00020161085889897003	'entropy': 0.028500345787103504}. Best is trial 51 with value: -500.1933288574219. [0m
[32m[I 2022-01-22 23:47:15	889] [0m Trial 57 finished with value: 98.14669799804688 and parameters: {'r_scaling': 0.2073098598943515	'unroll': 2	'update_epoch': 13	'discount': 0.9234143022263621	'lr': 0.00028644408045450114	'entropy': 0.015376464171155915}. Best is trial 51 with value: -500.1933288574219. [0m
[32m[I 2022-01-22 23:50:51	358] [0m Trial 58 finished with value: -106.26220703125 and parameters: {'r_scaling': 0.13247381811672662	'unroll': 1	'update_epoch': 2	'discount': 0.9297864880087693	'lr': 0.00015825032675027053	'entropy': 0.07753596544635129}. Best is trial 51 with value: -500.1933288574219. [0m
[32m[I 2022-01-22 23:54:15	086] [0m Trial 59 finished with value: 102.91261291503906 and parameters: {'r_scaling': 0.06544783171116413	'unroll': 2	'update_epoch': 7	'discount': 0.9633514656295835	'lr': 0.0003944260250849457	'entropy': 0.0021118586239260713}. Best is trial 51 with value: -500.1933288574219. [0m
[32m[I 2022-01-22 23:57:33	496] [0m Trial 60 finished with value: 96.67127227783203 and parameters: {'r_scaling': 0.10386575812873304	'unroll': 3	'update_epoch': 12	'discount': 0.9447895531333766	'lr': 0.00016469589740746737	'entropy': 0.0387977464783178}. Best is trial 51 with value: -500.1933288574219. [0m
[32m[I 2022-01-23 00:00:39	440] [0m Trial 61 finished with value: -165.92337036132812 and parameters: {'r_scaling': 0.32413494991251574	'unroll': 1	'update_epoch': 11	'discount': 0.9292978515661927	'lr': 0.0001334872627057979	'entropy': 0.018168410222839125}. Best is trial 51 with value: -500.1933288574219. [0m
[32m[I 2022-01-23 00:04:18	287] [0m Trial 62 finished with value: -6.4981889724731445 and parameters: {'r_scaling': 0.21496315570857777	'unroll': 1	'update_epoch': 11	'discount': 0.9353458199362636	'lr': 0.00011245745865495626	'entropy': 0.008707549499569868}. Best is trial 51 with value: -500.1933288574219. [0m
[32m[I 2022-01-23 00:07:39	627] [0m Trial 63 finished with value: 95.93804168701172 and parameters: {'r_scaling': 0.9867115741975165	'unroll': 2	'update_epoch': 13	'discount': 0.9396086747770032	'lr': 0.00013027673598378195	'entropy': 0.014393905680862608}. Best is trial 51 with value: -500.1933288574219. [0m
[32m[I 2022-01-23 00:10:45	865] [0m Trial 64 finished with value: 123.40611267089844 and parameters: {'r_scaling': 0.5915583921293373	'unroll': 1	'update_epoch': 11	'discount': 0.9304768840275291	'lr': 0.0001811047499074416	'entropy': 0.019194834998905223}. Best is trial 51 with value: -500.1933288574219. [0m
[32m[I 2022-01-23 00:14:10	278] [0m Trial 65 finished with value: 103.62100219726562 and parameters: {'r_scaling': 0.3575858400723077	'unroll': 9	'update_epoch': 10	'discount': 0.9233683120053301	'lr': 0.00010916376157279319	'entropy': 0.025777409504670622}. Best is trial 51 with value: -500.1933288574219. [0m
[32m[I 2022-01-23 00:17:50	331] [0m Trial 66 finished with value: 122.82352447509766 and parameters: {'r_scaling': 0.16929860807295577	'unroll': 1	'update_epoch': 14	'discount': 0.9947350192513761	'lr': 0.00013710159189227251	'entropy': 0.006442405221380027}. Best is trial 51 with value: -500.1933288574219. [0m
[32m[I 2022-01-23 00:20:50	020] [0m Trial 67 finished with value: 108.01862335205078 and parameters: {'r_scaling': 0.08517430748664256	'unroll': 2	'update_epoch': 12	'discount': 0.9377941601035439	'lr': 0.0019718379440157	'entropy': 0.054610120571268454}. Best is trial 51 with value: -500.1933288574219. [0m
[32m[I 2022-01-23 00:23:56	084] [0m Trial 68 finished with value: -16.733001708984375 and parameters: {'r_scaling': 6.045936334134761	'unroll': 1	'update_epoch': 8	'discount': 0.9187488668857791	'lr': 0.0005994133316523156	'entropy': 0.009857460840183099}. Best is trial 51 with value: -500.1933288574219. [0m
[32m[I 2022-01-23 00:27:19	212] [0m Trial 69 finished with value: 103.66600036621094 and parameters: {'r_scaling': 2.051089006730326	'unroll': 15	'update_epoch': 10	'discount': 0.9422937353361015	'lr': 0.00021025880875300004	'entropy': 0.03629187529054115}. Best is trial 51 with value: -500.1933288574219. [0m
[32m[I 2022-01-23 00:30:13	999] [0m Trial 70 finished with value: 98.107177734375 and parameters: {'r_scaling': 0.24865786480095112	'unroll': 3	'update_epoch': 6	'discount': 0.9152735222048014	'lr': 0.00015490674062847978	'entropy': 0.004374664368279458}. Best is trial 51 with value: -500.1933288574219. [0m
[32m[I 2022-01-23 00:33:49	176] [0m Trial 71 finished with value: 88.34629821777344 and parameters: {'r_scaling': 0.38359925113606586	'unroll': 1	'update_epoch': 9	'discount': 0.9278655224018338	'lr': 0.0001414255722480613	'entropy': 0.020066739044594276}. Best is trial 51 with value: -500.1933288574219. [0m
[32m[I 2022-01-23 00:36:49	167] [0m Trial 72 finished with value: 106.16136169433594 and parameters: {'r_scaling': 0.33340592020077	'unroll': 2	'update_epoch': 8	'discount': 0.9301706797136872	'lr': 0.00012533700893077723	'entropy': 0.013379140700601427}. Best is trial 51 with value: -500.1933288574219. [0m
[32m[I 2022-01-23 00:40:25	324] [0m Trial 73 finished with value: -956.888427734375 and parameters: {'r_scaling': 0.5664377385946675	'unroll': 1	'update_epoch': 10	'discount': 0.9355131421511577	'lr': 0.00018043767211744596	'entropy': 0.01818056761566098}. Best is trial 73 with value: -956.888427734375. [0m
[32m[I 2022-01-23 00:43:19	814] [0m Trial 74 finished with value: 96.35086822509766 and parameters: {'r_scaling': 0.6029060855137252	'unroll': 2	'update_epoch': 11	'discount': 0.9338317823431251	'lr': 0.0001839388129350866	'entropy': 0.012436878564190524}. Best is trial 73 with value: -956.888427734375. [0m
[32m[I 2022-01-23 00:46:56	089] [0m Trial 75 finished with value: 127.04352569580078 and parameters: {'r_scaling': 0.969018803144145	'unroll': 1	'update_epoch': 10	'discount': 0.9356747587264898	'lr': 0.00024505179395497716	'entropy': 0.0002400334931896314}. Best is trial 73 with value: -956.888427734375. [0m
[32m[I 2022-01-23 00:50:44	372] [0m Trial 76 finished with value: 115.0284652709961 and parameters: {'r_scaling': 0.14312126067327213	'unroll': 1	'update_epoch': 13	'discount': 0.9247914857506225	'lr': 0.00010874359420208414	'entropy': 0.01676475997519603}. Best is trial 73 with value: -956.888427734375. [0m
[32m[I 2022-01-23 00:53:40	498] [0m Trial 77 finished with value: 107.1209487915039 and parameters: {'r_scaling': 1.4544172939644582	'unroll': 14	'update_epoch': 11	'discount': 0.9459948870812692	'lr': 0.00012228100511670176	'entropy': 0.02578638799075962}. Best is trial 73 with value: -956.888427734375. [0m
[32m[I 2022-01-23 00:57:03	329] [0m Trial 78 finished with value: 99.68919372558594 and parameters: {'r_scaling': 0.10228586865667978	'unroll': 2	'update_epoch': 15	'discount': 0.9385465350060235	'lr': 0.00015698483725153767	'entropy': 0.07501272038571374}. Best is trial 73 with value: -956.888427734375. [0m
[32m[I 2022-01-23 01:00:23	890] [0m Trial 79 finished with value: 99.35479736328125 and parameters: {'r_scaling': 0.2959060819225822	'unroll': 2	'update_epoch': 5	'discount': 0.9317973685840893	'lr': 0.00017525587010572077	'entropy': 0.007236558475981586}. Best is trial 73 with value: -956.888427734375. [0m
[32m[I 2022-01-23 01:04:02	284] [0m Trial 80 finished with value: 63.760101318359375 and parameters: {'r_scaling': 0.18170318241716885	'unroll': 1	'update_epoch': 14	'discount': 0.942226696534729	'lr': 0.00010112883331497117	'entropy': 0.03340636456273937}. Best is trial 73 with value: -956.888427734375. [0m
[32m[I 2022-01-23 01:07:37	087] [0m Trial 81 finished with value: -38.33460235595703 and parameters: {'r_scaling': 0.05939127927956235	'unroll': 1	'update_epoch': 9	'discount': 0.9277836879515682	'lr': 0.00014887633435943512	'entropy': 0.020884160773145557}. Best is trial 73 with value: -956.888427734375. [0m
[32m[I 2022-01-23 01:11:16	741] [0m Trial 82 finished with value: -254.12973022460938 and parameters: {'r_scaling': 0.4218213354400846	'unroll': 1	'update_epoch': 9	'discount': 0.928325462605646	'lr': 0.00013673995947100938	'entropy': 0.011422188877302456}. Best is trial 73 with value: -956.888427734375. [0m
[32m[I 2022-01-23 01:14:40	725] [0m Trial 83 finished with value: 99.34304809570312 and parameters: {'r_scaling': 0.5675308575811585	'unroll': 3	'update_epoch': 12	'discount': 0.9351412566124628	'lr': 0.00012887323333977445	'entropy': 0.008747891662826699}. Best is trial 73 with value: -956.888427734375. [0m
[32m[I 2022-01-23 01:17:52	230] [0m Trial 84 finished with value: -205.06033325195312 and parameters: {'r_scaling': 0.4827718000477261	'unroll': 1	'update_epoch': 10	'discount': 0.9250285223203545	'lr': 0.00011517012464662394	'entropy': 0.011445693130343902}. Best is trial 73 with value: -956.888427734375. [0m
[32m[I 2022-01-23 01:21:16	371] [0m Trial 85 finished with value: 93.74141693115234 and parameters: {'r_scaling': 0.445229354148733	'unroll': 2	'update_epoch': 10	'discount': 0.9207288972416159	'lr': 0.00011646360420136465	'entropy': 0.011573848429202092}. Best is trial 73 with value: -956.888427734375. [0m
[32m[I 2022-01-23 01:24:46	924] [0m Trial 86 finished with value: -160.61102294921875 and parameters: {'r_scaling': 0.723298143123277	'unroll': 1	'update_epoch': 9	'discount': 0.9254218352022853	'lr': 0.00012040181005471284	'entropy': 0.005162047132465508}. Best is trial 73 with value: -956.888427734375. [0m
[32m[I 2022-01-23 01:28:10	742] [0m Trial 87 finished with value: 97.74822998046875 and parameters: {'r_scaling': 0.08689495236840292	'unroll': 2	'update_epoch': 8	'discount': 0.9323699352303325	'lr': 0.00014057001222684634	'entropy': 0.0036221141785366204}. Best is trial 73 with value: -956.888427734375. [0m
[32m[I 2022-01-23 01:31:28	604] [0m Trial 88 finished with value: 99.07134246826172 and parameters: {'r_scaling': 0.2503744163087972	'unroll': 11	'update_epoch': 9	'discount': 0.910328314995037	'lr': 0.00020182336588148503	'entropy': 0.009935895405592431}. Best is trial 73 with value: -956.888427734375. [0m
[32m[I 2022-01-23 01:34:52	819] [0m Trial 89 finished with value: 100.53643035888672 and parameters: {'r_scaling': 0.11593771167738448	'unroll': 6	'update_epoch': 10	'discount': 0.9505945745488826	'lr': 0.00016462794318003191	'entropy': 0.013611018809656485}. Best is trial 73 with value: -956.888427734375. [0m
[32m[I 2022-01-23 01:38:24	245] [0m Trial 90 finished with value: 106.21267700195312 and parameters: {'r_scaling': 0.861422879070749	'unroll': 4	'update_epoch': 7	'discount': 0.9234831056756473	'lr': 0.00010960742161802284	'entropy': 0.028423958095420095}. Best is trial 73 with value: -956.888427734375. [0m
[32m[I 2022-01-23 01:42:05	549] [0m Trial 91 finished with value: 117.58506774902344 and parameters: {'r_scaling': 0.44916085671519146	'unroll': 1	'update_epoch': 11	'discount': 0.9298360187247767	'lr': 0.00014874192890197216	'entropy': 0.01724904210725649}. Best is trial 73 with value: -956.888427734375. [0m
[32m[I 2022-01-23 01:45:44	497] [0m Trial 92 finished with value: -190.8493194580078 and parameters: {'r_scaling': 0.31122982760588747	'unroll': 1	'update_epoch': 11	'discount': 0.9371415951488371	'lr': 0.00013569020745081653	'entropy': 0.022186254484943116}. Best is trial 73 with value: -956.888427734375. [0m
[32m[I 2022-01-23 01:48:57	754] [0m Trial 93 finished with value: -126.43531036376953 and parameters: {'r_scaling': 0.14148457321244828	'unroll': 1	'update_epoch': 9	'discount': 0.9364936796645551	'lr': 0.00013290805144500006	'entropy': 0.023435144610415463}. Best is trial 73 with value: -956.888427734375. [0m
[32m[I 2022-01-23 01:52:22	236] [0m Trial 94 finished with value: 97.73303985595703 and parameters: {'r_scaling': 0.19373327346842317	'unroll': 2	'update_epoch': 10	'discount': 0.9410281494532683	'lr': 0.00011711286825639549	'entropy': 0.015365242119079582}. Best is trial 73 with value: -956.888427734375. [0m
[32m[I 2022-01-23 01:56:01	007] [0m Trial 95 finished with value: -71.05795288085938 and parameters: {'r_scaling': 0.2639200578171724	'unroll': 1	'update_epoch': 12	'discount': 0.9327483993925368	'lr': 0.00010735603818948373	'entropy': 0.0402545826578995}. Best is trial 73 with value: -956.888427734375. [0m
[32m[I 2022-01-23 01:59:21	641] [0m Trial 96 finished with value: 101.73887634277344 and parameters: {'r_scaling': 51.72870555204981	'unroll': 2	'update_epoch': 14	'discount': 0.9259655757687171	'lr': 0.00016546730873932169	'entropy': 0.011287664199702552}. Best is trial 73 with value: -956.888427734375. [0m
[32m[I 2022-01-23 02:03:07	711] [0m Trial 97 finished with value: 126.40924072265625 and parameters: {'r_scaling': 0.07147792061296489	'unroll': 1	'update_epoch': 15	'discount': 0.9387328188556583	'lr': 0.0011624196714035934	'entropy': 0.012572981594072257}. Best is trial 73 with value: -956.888427734375. [0m
[32m[I 2022-01-23 02:06:12	297] [0m Trial 98 finished with value: 121.24762725830078 and parameters: {'r_scaling': 1.186602384254485	'unroll': 1	'update_epoch': 10	'discount': 0.9343069186270131	'lr': 0.00019581414031511304	'entropy': 0.007561114122838836}. Best is trial 73 with value: -956.888427734375. [0m
[32m[I 2022-01-23 02:09:37	473] [0m Trial 99 finished with value: 106.43309020996094 and parameters: {'r_scaling': 0.22126049439024956	'unroll': 2	'update_epoch': 11	'discount': 0.9370356493789899	'lr': 0.00015203694549309764	'entropy': 0.021916301205566577}. Best is trial 73 with value: -956.888427734375. [0m
[32m[I 2022-01-23 02:12:56	097] [0m Trial 100 finished with value: 101.41793823242188 and parameters: {'r_scaling': 0.1550539783695643	'unroll': 3	'update_epoch': 12	'discount': 0.9314248219178564	'lr': 0.00012666363190403198	'entropy': 0.04787993587290689}. Best is trial 73 with value: -956.888427734375. [0m
[32m[I 2022-01-23 02:16:33	111] [0m Trial 101 finished with value: -413.82476806640625 and parameters: {'r_scaling': 0.31850712443668194	'unroll': 1	'update_epoch': 11	'discount': 0.9284829536099153	'lr': 0.00013406343551190155	'entropy': 0.017444941149496178}. Best is trial 73 with value: -956.888427734375. [0m
[32m[I 2022-01-23 02:20:16	699] [0m Trial 102 finished with value: 124.47705841064453 and parameters: {'r_scaling': 0.5454006817605483	'unroll': 1	'update_epoch': 10	'discount': 0.9283169437505967	'lr': 0.00013900447020803223	'entropy': 0.016278089777222053}. Best is trial 73 with value: -956.888427734375. [0m
[32m[I 2022-01-23 02:23:28	645] [0m Trial 103 finished with value: -249.46624755859375 and parameters: {'r_scaling': 0.39668957658872883	'unroll': 1	'update_epoch': 11	'discount': 0.9224270415155028	'lr': 0.00010491640029470336	'entropy': 0.027951996460422804}. Best is trial 73 with value: -956.888427734375. [0m
[32m[I 2022-01-23 02:26:59	592] [0m Trial 104 finished with value: 108.77609252929688 and parameters: {'r_scaling': 0.3964859969826824	'unroll': 2	'update_epoch': 9	'discount': 0.9218438440203971	'lr': 0.00010408265490772626	'entropy': 0.010321935634399532}. Best is trial 73 with value: -956.888427734375. [0m
[32m[I 2022-01-23 02:30:40	178] [0m Trial 105 finished with value: 122.97137451171875 and parameters: {'r_scaling': 0.6911018358402554	'unroll': 1	'update_epoch': 3	'discount': 0.9192735896041735	'lr': 0.00010010039202301162	'entropy': 0.026659153627069863}. Best is trial 73 with value: -956.888427734375. [0m
[32m[I 2022-01-23 02:34:21	825] [0m Trial 106 finished with value: 129.7897491455078 and parameters: {'r_scaling': 0.46619181186355396	'unroll': 1	'update_epoch': 8	'discount': 0.9161439645605952	'lr': 0.0001181496483448858	'entropy': 0.0362500509131894}. Best is trial 73 with value: -956.888427734375. [0m
[32m[I 2022-01-23 02:37:49	262] [0m Trial 107 finished with value: 105.68222045898438 and parameters: {'r_scaling': 0.06165384891744301	'unroll': 2	'update_epoch': 13	'discount': 0.9229444808002765	'lr': 0.0001776385731600732	'entropy': 0.013625881223659432}. Best is trial 73 with value: -956.888427734375. [0m
[32m[I 2022-01-23 02:41:25	032] [0m Trial 108 finished with value: 125.52690124511719 and parameters: {'r_scaling': 0.09250431707647733	'unroll': 1	'update_epoch': 11	'discount': 0.9263213606788152	'lr': 0.00011304647744579583	'entropy': 0.030514017555679483}. Best is trial 73 with value: -956.888427734375. [0m
[32m[I 2022-01-23 02:44:20	167] [0m Trial 109 finished with value: 99.39321899414062 and parameters: {'r_scaling': 0.05036547248833807	'unroll': 3	'update_epoch': 12	'discount': 0.9292906491351349	'lr': 0.0003566545140450184	'entropy': 0.008912302042448987}. Best is trial 73 with value: -956.888427734375. [0m
[32m[I 2022-01-23 02:47:44	471] [0m Trial 110 finished with value: 105.72278594970703 and parameters: {'r_scaling': 0.2155997975912097	'unroll': 2	'update_epoch': 11	'discount': 0.9247341870276069	'lr': 0.001028820044034322	'entropy': 0.006868175233168074}. Best is trial 73 with value: -956.888427734375. [0m
[32m[I 2022-01-23 02:50:50	241] [0m Trial 111 finished with value: -52.68474578857422 and parameters: {'r_scaling': 0.2963777806015462	'unroll': 1	'update_epoch': 11	'discount': 0.9318442048575634	'lr': 0.0001324243207474118	'entropy': 0.018506167182508283}. Best is trial 73 with value: -956.888427734375. [0m
[32m[I 2022-01-23 02:54:03	407] [0m Trial 112 finished with value: -216.69334411621094 and parameters: {'r_scaling': 0.34847292286236703	'unroll': 1	'update_epoch': 10	'discount': 0.9340140094853705	'lr': 0.00012515264098263314	'entropy': 0.0210949495374817}. Best is trial 73 with value: -956.888427734375. [0m
[32m[I 2022-01-23 02:57:44	131] [0m Trial 113 finished with value: -221.14366149902344 and parameters: {'r_scaling': 0.3523604227929028	'unroll': 1	'update_epoch': 10	'discount': 0.9347728094114617	'lr': 0.000125654974545143	'entropy': 0.014818394194020371}. Best is trial 73 with value: -956.888427734375. [0m
[32m[I 2022-01-23 03:01:26	234] [0m Trial 114 finished with value: -290.9898681640625 and parameters: {'r_scaling': 0.36328497106138435	'unroll': 1	'update_epoch': 9	'discount': 0.9344987609158727	'lr': 0.0001257081320245896	'entropy': 0.014936760352764481}. Best is trial 73 with value: -956.888427734375. [0m
[32m[I 2022-01-23 03:05:04	874] [0m Trial 115 finished with value: 85.53146362304688 and parameters: {'r_scaling': 0.35566405180755695	'unroll': 1	'update_epoch': 9	'discount': 0.9347246100200806	'lr': 0.00015781045935275032	'entropy': 0.014749281036078721}. Best is trial 73 with value: -956.888427734375. [0m
[32m[I 2022-01-23 03:08:31	399] [0m Trial 116 finished with value: 95.97975158691406 and parameters: {'r_scaling': 0.6357011445968829	'unroll': 2	'update_epoch': 10	'discount': 0.9421903204896593	'lr': 0.0001460960694423148	'entropy': 0.021421325086597633}. Best is trial 73 with value: -956.888427734375. [0m
[32m[I 2022-01-23 03:11:35	178] [0m Trial 117 finished with value: -358.87017822265625 and parameters: {'r_scaling': 0.3955221960790945	'unroll': 1	'update_epoch': 8	'discount': 0.9394001748690178	'lr': 0.00012557845590326	'entropy': 0.01766375077942191}. Best is trial 73 with value: -956.888427734375. [0m
[32m[I 2022-01-23 03:15:00	023] [0m Trial 118 finished with value: 104.7572021484375 and parameters: {'r_scaling': 0.26433953512173286	'unroll': 2	'update_epoch': 8	'discount': 0.9402047841727009	'lr': 0.00016762393371973151	'entropy': 0.018202035729351335}. Best is trial 73 with value: -956.888427734375. [0m
[32m[I 2022-01-23 03:18:35	960] [0m Trial 119 finished with value: 123.46379089355469 and parameters: {'r_scaling': 0.18732966280202323	'unroll': 1	'update_epoch': 8	'discount': 0.9787796811665271	'lr': 0.00012278967428715914	'entropy': 0.01567842238551427}. Best is trial 73 with value: -956.888427734375. [0m
[32m[I 2022-01-23 03:22:24	630] [0m Trial 120 finished with value: -100.16793823242188 and parameters: {'r_scaling': 0.40921290088399154	'unroll': 1	'update_epoch': 9	'discount': 0.9455346329688563	'lr': 0.00018593925571769518	'entropy': 0.02570347046527947}. Best is trial 73 with value: -956.888427734375. [0m
[32m[I 2022-01-23 03:26:07	005] [0m Trial 121 finished with value: -357.6727294921875 and parameters: {'r_scaling': 0.3488469753211446	'unroll': 1	'update_epoch': 10	'discount': 0.9381769700493993	'lr': 0.00012978704479278184	'entropy': 0.033854375511294464}. Best is trial 73 with value: -956.888427734375. [0m
[32m[I 2022-01-23 03:29:48	647] [0m Trial 122 finished with value: -200.6026611328125 and parameters: {'r_scaling': 0.4934084388644384	'unroll': 1	'update_epoch': 9	'discount': 0.938420376010877	'lr': 0.00014278043140478626	'entropy': 0.05299430858993177}. Best is trial 73 with value: -956.888427734375. [0m
[32m[I 2022-01-23 03:32:48	387] [0m Trial 123 finished with value: 102.35138702392578 and parameters: {'r_scaling': 0.39678267418404267	'unroll': 2	'update_epoch': 10	'discount': 0.9437246800604748	'lr': 0.00013020349057048786	'entropy': 0.0336586627737932}. Best is trial 73 with value: -956.888427734375. [0m
[32m[I 2022-01-23 03:35:53	268] [0m Trial 124 finished with value: -105.86253356933594 and parameters: {'r_scaling': 0.8444253119740144	'unroll': 1	'update_epoch': 9	'discount': 0.9361927895712224	'lr': 0.00010732659427592492	'entropy': 0.027315811666882257}. Best is trial 73 with value: -956.888427734375. [0m
[32m[I 2022-01-23 03:39:31	825] [0m Trial 125 finished with value: -121.64610290527344 and parameters: {'r_scaling': 0.302523864986369	'unroll': 1	'update_epoch': 10	'discount': 0.9309696255805083	'lr': 0.0001606479720049601	'entropy': 0.04208824355556471}. Best is trial 73 with value: -956.888427734375. [0m
[32m[I 2022-01-23 03:42:53	448] [0m Trial 126 finished with value: 101.03324127197266 and parameters: {'r_scaling': 0.2488045524208443	'unroll': 2	'update_epoch': 6	'discount': 0.9401671639065017	'lr': 0.00015090887648013844	'entropy': 0.012957511913063605}. Best is trial 73 with value: -956.888427734375. [0m
[32m[I 2022-01-23 03:46:26	983] [0m Trial 127 finished with value: -306.5342712402344 and parameters: {'r_scaling': 0.5323383869863697	'unroll': 1	'update_epoch': 7	'discount': 0.9481501935478547	'lr': 0.00013855237946477952	'entropy': 0.017382923786116486}. Best is trial 73 with value: -956.888427734375. [0m
[32m[I 2022-01-23 03:49:49	675] [0m Trial 128 finished with value: 102.69351196289062 and parameters: {'r_scaling': 14.407499213101898	'unroll': 2	'update_epoch': 7	'discount': 0.9490828822084209	'lr': 0.00013476679514019498	'entropy': 0.017539971271047096}. Best is trial 73 with value: -956.888427734375. [0m
[32m[I 2022-01-23 03:53:33	240] [0m Trial 129 finished with value: -368.5429992675781 and parameters: {'r_scaling': 0.5500645307759677	'unroll': 1	'update_epoch': 7	'discount': 0.9472888778028756	'lr': 0.00017654148145744903	'entropy': 0.0012067835893078208}. Best is trial 73 with value: -956.888427734375. [0m
[32m[I 2022-01-23 03:56:27	463] [0m Trial 130 finished with value: 102.0567398071289 and parameters: {'r_scaling': 0.5451137678616226	'unroll': 2	'update_epoch': 7	'discount': 0.9471739287159965	'lr': 0.0002295189048967061	'entropy': 0.06291911808628438}. Best is trial 73 with value: -956.888427734375. [0m
[32m[I 2022-01-23 04:00:01	940] [0m Trial 131 finished with value: 56.01148986816406 and parameters: {'r_scaling': 0.6220800255129092	'unroll': 1	'update_epoch': 7	'discount': 0.9498261865516979	'lr': 0.0001733986183464489	'entropy': 0.0008665901633946877}. Best is trial 73 with value: -956.888427734375. [0m
[32m[I 2022-01-23 04:03:01	602] [0m Trial 132 finished with value: -163.65957641601562 and parameters: {'r_scaling': 0.42687249555757556	'unroll': 1	'update_epoch': 6	'discount': 0.9557272582908881	'lr': 0.00021091006450682273	'entropy': 0.0013302595650684851}. Best is trial 73 with value: -956.888427734375. [0m
[32m[I 2022-01-23 04:06:43	885] [0m Trial 133 finished with value: 116.75778198242188 and parameters: {'r_scaling': 0.7910966591004237	'unroll': 1	'update_epoch': 7	'discount': 0.9523256856168457	'lr': 0.00014184835765416754	'entropy': 0.0007748749279573483}. Best is trial 73 with value: -956.888427734375. [0m
[32m[I 2022-01-23 04:09:38	824] [0m Trial 134 finished with value: 104.94546508789062 and parameters: {'r_scaling': 198.5886570253579	'unroll': 9	'update_epoch': 8	'discount': 0.9461045775381225	'lr': 0.00015259686770477596	'entropy': 0.0002923222689696697}. Best is trial 73 with value: -956.888427734375. [0m
[32m[I 2022-01-23 04:13:13	300] [0m Trial 135 finished with value: -325.8666687011719 and parameters: {'r_scaling': 0.5311604857948079	'unroll': 1	'update_epoch': 5	'discount': 0.9524328037969727	'lr': 0.00018793881693758023	'entropy': 0.024039872161529075}. Best is trial 73 with value: -956.888427734375. [0m
[32m[I 2022-01-23 04:16:36	151] [0m Trial 136 finished with value: 99.19882202148438 and parameters: {'r_scaling': 1.1935986565749843	'unroll': 2	'update_epoch': 5	'discount': 0.9517478640142674	'lr': 0.00018818250990545017	'entropy': 0.0019546395875394114}. Best is trial 73 with value: -956.888427734375. [0m
[32m[I 2022-01-23 04:20:09	923] [0m Trial 137 finished with value: -416.1826171875 and parameters: {'r_scaling': 0.6487021221510076	'unroll': 1	'update_epoch': 5	'discount': 0.9539603609377911	'lr': 0.00017103599561797092	'entropy': 0.023789542382882407}. Best is trial 73 with value: -956.888427734375. [0m
[32m[I 2022-01-23 04:23:13	856] [0m Trial 138 finished with value: -296.1717224121094 and parameters: {'r_scaling': 0.5135953183597304	'unroll': 1	'update_epoch': 5	'discount': 0.95913612543801	'lr': 0.00019906414648825714	'entropy': 0.023840485635373387}. Best is trial 73 with value: -956.888427734375. [0m
[32m[I 2022-01-23 04:27:06	836] [0m Trial 139 finished with value: -705.0020751953125 and parameters: {'r_scaling': 0.5326614533749507	'unroll': 1	'update_epoch': 5	'discount': 0.96104444195853	'lr': 0.00020286093426956044	'entropy': 0.024430602700588538}. Best is trial 73 with value: -956.888427734375. [0m
[32m[I 2022-01-23 04:30:31	945] [0m Trial 140 finished with value: 99.75543212890625 and parameters: {'r_scaling': 0.9267451361106808	'unroll': 2	'update_epoch': 4	'discount': 0.9600912582424563	'lr': 0.00017387834040002455	'entropy': 0.03720228750403605}. Best is trial 73 with value: -956.888427734375. [0m
[32m[I 2022-01-23 04:34:06	233] [0m Trial 141 finished with value: -888.6387329101562 and parameters: {'r_scaling': 0.678927118151751	'unroll': 1	'update_epoch': 5	'discount': 0.9590495183169672	'lr': 0.0002394313117076716	'entropy': 0.02421203609551902}. Best is trial 73 with value: -956.888427734375. [0m
[32m[I 2022-01-23 04:37:44	324] [0m Trial 142 finished with value: -32.58164596557617 and parameters: {'r_scaling': 1.6032778090286421	'unroll': 1	'update_epoch': 5	'discount': 0.9669735945812158	'lr': 0.00018393101478127836	'entropy': 0.030994860507039618}. Best is trial 73 with value: -956.888427734375. [0m
[32m[I 2022-01-23 04:41:19	385] [0m Trial 143 finished with value: -1488.1436767578125 and parameters: {'r_scaling': 0.6722216859337841	'unroll': 1	'update_epoch': 4	'discount': 0.9548752270688581	'lr': 0.00025946157809483025	'entropy': 0.019131734642847464}. Best is trial 143 with value: -1488.1436767578125. [0m
[32m[I 2022-01-23 04:45:00	446] [0m Trial 144 finished with value: -480.4356689453125 and parameters: {'r_scaling': 1.0490612581724021	'unroll': 1	'update_epoch': 4	'discount': 0.9622109337766255	'lr': 0.00024213228484154658	'entropy': 0.02051250001631317}. Best is trial 143 with value: -1488.1436767578125. [0m
[32m[I 2022-01-23 04:48:24	251] [0m Trial 145 finished with value: 106.73944854736328 and parameters: {'r_scaling': 1.2025675765751025	'unroll': 7	'update_epoch': 4	'discount': 0.9628655745217691	'lr': 0.00026416394126881955	'entropy': 0.0004890916913372405}. Best is trial 143 with value: -1488.1436767578125. [0m
[32m[I 2022-01-23 04:51:54	014] [0m Trial 146 finished with value: -862.9400024414062 and parameters: {'r_scaling': 0.6872402788381813	'unroll': 1	'update_epoch': 4	'discount': 0.9616433193411965	'lr': 0.00024578408442308704	'entropy': 0.021423419293885918}. Best is trial 143 with value: -1488.1436767578125. [0m
[32m[I 2022-01-23 04:55:28	896] [0m Trial 147 finished with value: -1009.2626953125 and parameters: {'r_scaling': 0.7107904473932452	'unroll': 1	'update_epoch': 4	'discount': 0.9544229235666126	'lr': 0.0002859124829423791	'entropy': 0.023844510695134394}. Best is trial 143 with value: -1488.1436767578125. [0m
[32m[I 2022-01-23 04:58:24	378] [0m Trial 148 finished with value: 99.95977020263672 and parameters: {'r_scaling': 0.7401087219262088	'unroll': 2	'update_epoch': 4	'discount': 0.9649098536143926	'lr': 0.00029360871824791985	'entropy': 0.020038401192460493}. Best is trial 143 with value: -1488.1436767578125. [0m
[32m[I 2022-01-23 05:01:48	612] [0m Trial 149 finished with value: 57.836299896240234 and parameters: {'r_scaling': 1.0828660664523164	'unroll': 1	'update_epoch': 3	'discount': 0.9556458625957829	'lr': 0.00024183657825220444	'entropy': 0.03203877019835597}. Best is trial 143 with value: -1488.1436767578125. [0m
[32m[I 2022-01-23 05:04:52	867] [0m Trial 150 finished with value: -419.607421875 and parameters: {'r_scaling': 0.6223478003503765	'unroll': 1	'update_epoch': 3	'discount': 0.9605912788450609	'lr': 0.00025085448954120093	'entropy': 0.020383271613471816}. Best is trial 143 with value: -1488.1436767578125. [0m
[32m[I 2022-01-23 05:08:04	361] [0m Trial 151 finished with value: -457.0419006347656 and parameters: {'r_scaling': 0.666003410427929	'unroll': 1	'update_epoch': 3	'discount': 0.9579310326157077	'lr': 0.0002520309716798635	'entropy': 0.020385809636564476}. Best is trial 143 with value: -1488.1436767578125. [0m
[32m[I 2022-01-23 05:11:57	220] [0m Trial 152 finished with value: -582.8958740234375 and parameters: {'r_scaling': 0.6769145781605346	'unroll': 1	'update_epoch': 3	'discount': 0.9599418879645604	'lr': 0.00028072713968015935	'entropy': 0.019999520796185898}. Best is trial 143 with value: -1488.1436767578125. [0m
[32m[I 2022-01-23 05:15:01	752] [0m Trial 153 finished with value: -513.7332763671875 and parameters: {'r_scaling': 0.6579030313018607	'unroll': 1	'update_epoch': 3	'discount': 0.9606144373650316	'lr': 0.0002812121208049012	'entropy': 0.021280972977621944}. Best is trial 143 with value: -1488.1436767578125. [0m
[32m[I 2022-01-23 05:19:03	331] [0m Trial 154 finished with value: 105.73689270019531 and parameters: {'r_scaling': 0.6667252286499991	'unroll': 2	'update_epoch': 2	'discount': 0.9605039751691976	'lr': 0.0002886178365733988	'entropy': 0.02089490746802998}. Best is trial 143 with value: -1488.1436767578125. [0m
[32m[I 2022-01-23 05:22:49	740] [0m Trial 155 finished with value: -451.72235107421875 and parameters: {'r_scaling': 0.8941939872330349	'unroll': 1	'update_epoch': 3	'discount': 0.9624030631717962	'lr': 0.0002513106498943237	'entropy': 0.025348411652042106}. Best is trial 143 with value: -1488.1436767578125. [0m
[32m[I 2022-01-23 05:26:35	499] [0m Trial 156 finished with value: -408.93072509765625 and parameters: {'r_scaling': 0.9610358167599604	'unroll': 1	'update_epoch': 3	'discount': 0.9579673343046029	'lr': 0.00024908593754061986	'entropy': 0.02805581846099479}. Best is trial 143 with value: -1488.1436767578125. [0m
[32m[I 2022-01-23 05:30:22	937] [0m Trial 157 finished with value: -448.5149841308594 and parameters: {'r_scaling': 0.8369275734358099	'unroll': 1	'update_epoch': 2	'discount': 0.9694946764411456	'lr': 0.00030042475986491934	'entropy': 0.02436735072351456}. Best is trial 143 with value: -1488.1436767578125. [0m
[32m[I 2022-01-23 05:34:17	957] [0m Trial 158 finished with value: 102.79937744140625 and parameters: {'r_scaling': 0.7924171035950557	'unroll': 2	'update_epoch': 2	'discount': 0.9675996719335535	'lr': 0.0003338492763530717	'entropy': 0.024862546915386256}. Best is trial 143 with value: -1488.1436767578125. [0m
[32m[I 2022-01-23 05:38:29	311] [0m Trial 159 finished with value: 102.02224731445312 and parameters: {'r_scaling': 2.155580750635097	'unroll': 10	'update_epoch': 3	'discount': 0.9716883791479023	'lr': 0.00027634311421554053	'entropy': 0.023036068696618298}. Best is trial 143 with value: -1488.1436767578125. [0m
[32m[I 2022-01-23 05:42:57	558] [0m Trial 160 finished with value: 113.37760162353516 and parameters: {'r_scaling': 1.4095335725725147	'unroll': 2	'update_epoch': 2	'discount': 0.9615904338486018	'lr': 0.0003143006038803326	'entropy': 0.019976980086124314}. Best is trial 143 with value: -1488.1436767578125. [0m
[32m[I 2022-01-23 05:47:04	010] [0m Trial 161 finished with value: -1244.62890625 and parameters: {'r_scaling': 0.6508815847645636	'unroll': 1	'update_epoch': 4	'discount': 0.9547509710054553	'lr': 0.00025637047880959116	'entropy': 0.0290964425994794}. Best is trial 143 with value: -1488.1436767578125. [0m
[32m[I 2022-01-23 05:50:55	070] [0m Trial 162 finished with value: -825.9998779296875 and parameters: {'r_scaling': 0.6869296474722594	'unroll': 1	'update_epoch': 4	'discount': 0.9651830031175606	'lr': 0.0002573201231744095	'entropy': 0.02979100738858806}. Best is trial 143 with value: -1488.1436767578125. [0m
[32m[I 2022-01-23 05:54:45	794] [0m Trial 163 finished with value: -990.195068359375 and parameters: {'r_scaling': 0.8788631432844544	'unroll': 1	'update_epoch': 4	'discount': 0.9654596508223892	'lr': 0.00025046936270878734	'entropy': 0.028640265895022683}. Best is trial 143 with value: -1488.1436767578125. [0m
[32m[I 2022-01-23 05:58:27	407] [0m Trial 164 finished with value: -460.6759338378906 and parameters: {'r_scaling': 1.0462859590268894	'unroll': 1	'update_epoch': 4	'discount': 0.9703115943796817	'lr': 0.00021945402746316483	'entropy': 0.04346359176775161}. Best is trial 143 with value: -1488.1436767578125. [0m
[32m[I 2022-01-23 06:02:21	257] [0m Trial 165 finished with value: -186.802734375 and parameters: {'r_scaling': 1.0531771613529368	'unroll': 1	'update_epoch': 4	'discount': 0.9641974368345109	'lr': 0.000223102530855817	'entropy': 0.04479087824244119}. Best is trial 143 with value: -1488.1436767578125. [0m
[32m[I 2022-01-23 06:06:08	803] [0m Trial 166 finished with value: -636.3817749023438 and parameters: {'r_scaling': 1.7169954362079407	'unroll': 1	'update_epoch': 4	'discount': 0.9660738101085061	'lr': 0.00026294379067447063	'entropy': 0.03925781249875789}. Best is trial 143 with value: -1488.1436767578125. [0m
[32m[I 2022-01-23 06:09:56	370] [0m Trial 167 finished with value: -312.4803771972656 and parameters: {'r_scaling': 1.8149386252462385	'unroll': 1	'update_epoch': 4	'discount': 0.9568770238829459	'lr': 0.00023176007945955465	'entropy': 0.04294134948323626}. Best is trial 143 with value: -1488.1436767578125. [0m
[32m[I 2022-01-23 06:13:45	789] [0m Trial 168 finished with value: 102.97445678710938 and parameters: {'r_scaling': 2.6399606884261866	'unroll': 2	'update_epoch': 4	'discount': 0.9672873298377884	'lr': 0.0002761208424741289	'entropy': 0.03652487819473037}. Best is trial 143 with value: -1488.1436767578125. [0m
[32m[I 2022-01-23 06:17:41	211] [0m Trial 169 finished with value: -1218.333740234375 and parameters: {'r_scaling': 0.7534197869999594	'unroll': 1	'update_epoch': 4	'discount': 0.9659168010183932	'lr': 0.00026163219516567066	'entropy': 0.02971024464099156}. Best is trial 143 with value: -1488.1436767578125. [0m
[32m[I 2022-01-23 06:21:36	098] [0m Trial 170 finished with value: 93.48318481445312 and parameters: {'r_scaling': 1.3713633727022256	'unroll': 2	'update_epoch': 4	'discount': 0.9717734799777328	'lr': 0.00026993968957366284	'entropy': 0.0577462307921513}. Best is trial 143 with value: -1488.1436767578125. [0m
[32m[I 2022-01-23 06:25:28	525] [0m Trial 171 finished with value: -1030.9451904296875 and parameters: {'r_scaling': 0.7476009347804365	'unroll': 1	'update_epoch': 4	'discount': 0.9641251928157838	'lr': 0.00025982205759972815	'entropy': 0.02946285447726314}. Best is trial 143 with value: -1488.1436767578125. [0m
[32m[I 2022-01-23 06:28:46	437] [0m Trial 172 finished with value: -178.43795776367188 and parameters: {'r_scaling': 0.7474438831307031	'unroll': 1	'update_epoch': 4	'discount': 0.965206137510548	'lr': 0.00021693927047760953	'entropy': 0.029706937650143952}. Best is trial 143 with value: -1488.1436767578125. [0m
[32m[I 2022-01-23 06:32:42	374] [0m Trial 173 finished with value: -976.379638671875 and parameters: {'r_scaling': 1.0717968216554759	'unroll': 1	'update_epoch': 4	'discount': 0.9704486180373345	'lr': 0.0003128991217961391	'entropy': 0.03913893599311432}. Best is trial 143 with value: -1488.1436767578125. [0m
[32m[I 2022-01-23 06:36:30	373] [0m Trial 174 finished with value: -552.9762573242188 and parameters: {'r_scaling': 0.9001163947076651	'unroll': 1	'update_epoch': 4	'discount': 0.9650451326649739	'lr': 0.0003150787480892953	'entropy': 0.03825145186025413}. Best is trial 143 with value: -1488.1436767578125. [0m
[32m[I 2022-01-23 06:40:18	518] [0m Trial 175 finished with value: -682.57275390625 and parameters: {'r_scaling': 0.8949864627173925	'unroll': 1	'update_epoch': 4	'discount': 0.9659827523326512	'lr': 0.0003106974694789723	'entropy': 0.03470180560561668}. Best is trial 143 with value: -1488.1436767578125. [0m
[32m[I 2022-01-23 06:44:06	431] [0m Trial 176 finished with value: 121.17546844482422 and parameters: {'r_scaling': 0.8229598545767822	'unroll': 1	'update_epoch': 4	'discount': 0.9756959063298865	'lr': 0.00033930753070899347	'entropy': 0.03814204330095101}. Best is trial 143 with value: -1488.1436767578125. [0m
[32m[I 2022-01-23 06:47:54	014] [0m Trial 177 finished with value: -665.2667236328125 and parameters: {'r_scaling': 1.2461826358264638	'unroll': 1	'update_epoch': 5	'discount': 0.9653681519070221	'lr': 0.00030700872347282586	'entropy': 0.029110740202505935}. Best is trial 143 with value: -1488.1436767578125. [0m
[32m[I 2022-01-23 06:50:49	604] [0m Trial 178 finished with value: 93.27073669433594 and parameters: {'r_scaling': 1.230081265866339	'unroll': 8	'update_epoch': 5	'discount': 0.9662581072894252	'lr': 0.00031364206061928573	'entropy': 0.030156621065724566}. Best is trial 143 with value: -1488.1436767578125. [0m
[32m[I 2022-01-23 06:53:52	247] [0m Trial 179 finished with value: -118.98800659179688 and parameters: {'r_scaling': 1.5870772381100995	'unroll': 1	'update_epoch': 4	'discount': 0.9642005705018191	'lr': 0.00036545684628419095	'entropy': 0.049077871949696324}. Best is trial 143 with value: -1488.1436767578125. [0m
[32m[I 2022-01-23 06:57:38	330] [0m Trial 180 finished with value: -615.79443359375 and parameters: {'r_scaling': 0.7162220211195836	'unroll': 1	'update_epoch': 3	'discount': 0.9691824016360661	'lr': 0.00031012900879377183	'entropy': 0.0339173478333047}. Best is trial 143 with value: -1488.1436767578125. [0m
[32m[I 2022-01-23 07:01:21	658] [0m Trial 181 finished with value: -578.044677734375 and parameters: {'r_scaling': 0.7164082141150208	'unroll': 1	'update_epoch': 3	'discount': 0.9684706542619234	'lr': 0.0003166261201897721	'entropy': 0.03401753724255447}. Best is trial 143 with value: -1488.1436767578125. [0m
[32m[I 2022-01-23 07:05:22	132] [0m Trial 182 finished with value: -795.8193359375 and parameters: {'r_scaling': 0.9453047127418995	'unroll': 1	'update_epoch': 4	'discount': 0.9686156117324596	'lr': 0.0002620587370475581	'entropy': 0.033903000905522944}. Best is trial 143 with value: -1488.1436767578125. [0m
[32m[I 2022-01-23 07:08:27	176] [0m Trial 183 finished with value: -321.7857360839844 and parameters: {'r_scaling': 0.704186496956942	'unroll': 1	'update_epoch': 5	'discount': 0.9742075771800978	'lr': 0.0002652753655379751	'entropy': 0.03141773597372353}. Best is trial 143 with value: -1488.1436767578125. [0m
[32m[I 2022-01-23 07:12:09	910] [0m Trial 184 finished with value: -467.34222412109375 and parameters: {'r_scaling': 0.9648597447573013	'unroll': 1	'update_epoch': 4	'discount': 0.969120766416837	'lr': 0.00029695796258155286	'entropy': 0.03275405842830879}. Best is trial 143 with value: -1488.1436767578125. [0m
[32m[I 2022-01-23 07:15:06	419] [0m Trial 185 finished with value: 101.50991821289062 and parameters: {'r_scaling': 0.7568892295429044	'unroll': 2	'update_epoch': 3	'discount': 0.9713540257945975	'lr': 0.00038686274922740556	'entropy': 0.028547171218940202}. Best is trial 143 with value: -1488.1436767578125. [0m
[32m[I 2022-01-23 07:18:58	651] [0m Trial 186 finished with value: 123.77490997314453 and parameters: {'r_scaling': 1.1295709663939095	'unroll': 1	'update_epoch': 3	'discount': 0.9680854634563582	'lr': 0.0004549214908848752	'entropy': 0.03598937690814693}. Best is trial 143 with value: -1488.1436767578125. [0m
[32m[I 2022-01-23 07:21:54	242] [0m Trial 187 finished with value: 106.58995056152344 and parameters: {'r_scaling': 0.5867875982960283	'unroll': 2	'update_epoch': 4	'discount': 0.9632464618887066	'lr': 0.0002629006016781699	'entropy': 0.06763834993413337}. Best is trial 143 with value: -1488.1436767578125. [0m
[32m[I 2022-01-23 07:25:53	468] [0m Trial 188 finished with value: 120.61709594726562 and parameters: {'r_scaling': 0.873468219097288	'unroll': 1	'update_epoch': 5	'discount': 0.9658316165968743	'lr': 0.00031090818955729004	'entropy': 0.040877435460471595}. Best is trial 143 with value: -1488.1436767578125. [0m
[32m[I 2022-01-23 07:29:43	817] [0m Trial 189 finished with value: -674.4267578125 and parameters: {'r_scaling': 1.3050929370132396	'unroll': 1	'update_epoch': 4	'discount': 0.9690218438822409	'lr': 0.00028965311590341616	'entropy': 0.05048073326535422}. Best is trial 143 with value: -1488.1436767578125. [0m
[32m[I 2022-01-23 07:33:26	559] [0m Trial 190 finished with value: -618.20361328125 and parameters: {'r_scaling': 1.8033556884288018	'unroll': 1	'update_epoch': 4	'discount': 0.9736948824727278	'lr': 0.00028533237965015106	'entropy': 0.051230621842669896}. Best is trial 143 with value: -1488.1436767578125. [0m
[32m[I 2022-01-23 07:37:13	896] [0m Trial 191 finished with value: -1008.051513671875 and parameters: {'r_scaling': 1.8239007458113927	'unroll': 1	'update_epoch': 4	'discount': 0.97452252315654	'lr': 0.00028420209626073896	'entropy': 0.05006728044798455}. Best is trial 143 with value: -1488.1436767578125. [0m
[32m[I 2022-01-23 07:40:22	615] [0m Trial 192 finished with value: -408.49163818359375 and parameters: {'r_scaling': 1.8320273685489055	'unroll': 1	'update_epoch': 4	'discount': 0.9769895796100324	'lr': 0.00023509902896532963	'entropy': 0.05012776003825685}. Best is trial 143 with value: -1488.1436767578125. [0m
[32m[I 2022-01-23 07:44:26	407] [0m Trial 193 finished with value: -793.116455078125 and parameters: {'r_scaling': 2.224939946370836	'unroll': 1	'update_epoch': 5	'discount': 0.9704996727000377	'lr': 0.00034037771080530833	'entropy': 0.055173165200975025}. Best is trial 143 with value: -1488.1436767578125. [0m
[32m[I 2022-01-23 07:48:20	520] [0m Trial 194 finished with value: -427.36431884765625 and parameters: {'r_scaling': 3.637949249969197	'unroll': 1	'update_epoch': 5	'discount': 0.9732122538621943	'lr': 0.0003477785458378305	'entropy': 0.05247497356304464}. Best is trial 143 with value: -1488.1436767578125. [0m
[32m[I 2022-01-23 07:52:17	521] [0m Trial 195 finished with value: -758.8489379882812 and parameters: {'r_scaling': 2.67283660426499	'unroll': 1	'update_epoch': 4	'discount': 0.9739276175855429	'lr': 0.0002640776104018003	'entropy': 0.08376551374522961}. Best is trial 143 with value: -1488.1436767578125. [0m
[32m[I 2022-01-23 07:56:08	104] [0m Trial 196 finished with value: 105.53871154785156 and parameters: {'r_scaling': 2.2234225418963294	'unroll': 2	'update_epoch': 4	'discount': 0.9668332702757012	'lr': 0.0002581362866281391	'entropy': 0.06999821577590423}. Best is trial 143 with value: -1488.1436767578125. [0m
[32m[I 2022-01-23 08:00:20	010] [0m Trial 197 finished with value: -470.9950866699219 and parameters: {'r_scaling': 2.878368621753087	'unroll': 1	'update_epoch': 5	'discount': 0.9795740521418348	'lr': 0.0002658467274469308	'entropy': 0.08902826387008216}. Best is trial 143 with value: -1488.1436767578125. [0m
[32m[I 2022-01-23 08:04:11	290] [0m Trial 198 finished with value: -126.12825775146484 and parameters: {'r_scaling': 2.461009181055834	'unroll': 1	'update_epoch': 4	'discount': 0.983689325690712	'lr': 0.00023719813146203935	'entropy': 0.08299120696674973}. Best is trial 143 with value: -1488.1436767578125. [0m
[32m[I 2022-01-23 08:07:59	527] [0m Trial 199 finished with value: -161.1644287109375 and parameters: {'r_scaling': 3.4360672111291675	'unroll': 1	'update_epoch': 5	'discount': 0.9708206915841859	'lr': 0.0002857209803151041	'entropy': 0.059526020525576796}. Best is trial 143 with value: -1488.1436767578125. [0m
