# Supplementary material
Source: ML conference proceedings conference paper supplement (https://proceedings.neurips.cc/paper_files/paper/2022/hash/10a6bdcabbd5a3d36b760daa295f63c1-Abstract.html)
Supplement: Supplementary file 1 [file 10a6bdcabbd5a3d36b760daa295f63c1-Supplemental-Conference.zip › neurips2022/code/robotics_code/hp_searches/halfcheetah_150K_less.log]

[32m[I 2022-01-20 13:13:15	040] [0m A new study created in memory with name: no-name-45c89335-f7e7-488e-84a5-5fd8526ca3cf [0m
[32m[I 2022-01-20 13:16:42	876] [0m Trial 0 finished with value: 104.75370788574219 and parameters: {'r_scaling': 3.0837794123521185	'unroll': 3	'update_epoch': 8	'discount': 0.9857643285061989	'lr': 0.0002016902553923577	'entropy': 0.0032362880044393473}. Best is trial 0 with value: 104.75370788574219. [0m
[32m[I 2022-01-20 13:20:07	191] [0m Trial 1 finished with value: 95.04766082763672 and parameters: {'r_scaling': 1.2705640237927178	'unroll': 5	'update_epoch': 12	'discount': 0.9927246891835227	'lr': 0.0006289507117380087	'entropy': 0.0009219529290289424}. Best is trial 1 with value: 95.04766082763672. [0m
[32m[I 2022-01-20 13:23:07	060] [0m Trial 2 finished with value: 106.07228088378906 and parameters: {'r_scaling': 5.076316712796476	'unroll': 11	'update_epoch': 3	'discount': 0.9752886891544127	'lr': 0.00015467891177692065	'entropy': 0.01925479151002059}. Best is trial 1 with value: 95.04766082763672. [0m
[32m[I 2022-01-20 13:26:34	692] [0m Trial 3 finished with value: 99.33120727539062 and parameters: {'r_scaling': 54.14332335374624	'unroll': 6	'update_epoch': 6	'discount': 0.9115490969323096	'lr': 0.00015756186879867546	'entropy': 0.013428364876334796}. Best is trial 1 with value: 95.04766082763672. [0m
[32m[I 2022-01-20 13:30:04	301] [0m Trial 4 finished with value: 92.10224914550781 and parameters: {'r_scaling': 0.6905721961508644	'unroll': 7	'update_epoch': 10	'discount': 0.9135028324067105	'lr': 0.0001178775804516974	'entropy': 0.07267316020150567}. Best is trial 4 with value: 92.10224914550781. [0m
[32m[I 2022-01-20 13:33:31	332] [0m Trial 5 finished with value: 103.53936767578125 and parameters: {'r_scaling': 66.17029171167721	'unroll': 7	'update_epoch': 3	'discount': 0.9454078025530277	'lr': 0.0018587620243145139	'entropy': 0.013909559265374643}. Best is trial 4 with value: 92.10224914550781. [0m
[32m[I 2022-01-20 13:36:30	490] [0m Trial 6 finished with value: 99.02964782714844 and parameters: {'r_scaling': 0.3496753218801003	'unroll': 11	'update_epoch': 6	'discount': 0.9586233127795046	'lr': 0.0007382544465800026	'entropy': 0.04464660350518623}. Best is trial 4 with value: 92.10224914550781. [0m
[32m[I 2022-01-20 13:39:31	407] [0m Trial 7 finished with value: 104.8178482055664 and parameters: {'r_scaling': 8.53874723569798	'unroll': 5	'update_epoch': 7	'discount': 0.9484416216024373	'lr': 0.00018610220939427682	'entropy': 0.0012571447784217986}. Best is trial 4 with value: 92.10224914550781. [0m
[32m[I 2022-01-20 13:42:58	167] [0m Trial 8 finished with value: 96.7606201171875 and parameters: {'r_scaling': 1.562046354244004	'unroll': 8	'update_epoch': 7	'discount': 0.9245678049028758	'lr': 0.0006435392521699953	'entropy': 0.0027242515985492956}. Best is trial 4 with value: 92.10224914550781. [0m
[32m[I 2022-01-20 13:46:30	882] [0m Trial 9 finished with value: 103.22381591796875 and parameters: {'r_scaling': 1.2812033033492394	'unroll': 10	'update_epoch': 12	'discount': 0.9500516532007168	'lr': 0.0003440148876574797	'entropy': 0.000800388027769138}. Best is trial 4 with value: 92.10224914550781. [0m
[32m[I 2022-01-20 13:49:59	959] [0m Trial 10 finished with value: 102.10552978515625 and parameters: {'r_scaling': 0.07440438433236601	'unroll': 15	'update_epoch': 15	'discount': 0.9016048158810596	'lr': 0.00010094509312181013	'entropy': 0.00016969334577940988}. Best is trial 4 with value: 92.10224914550781. [0m
[32m[I 2022-01-20 13:53:30	326] [0m Trial 11 finished with value: 99.40058898925781 and parameters: {'r_scaling': 0.2839906684049965	'unroll': 2	'update_epoch': 11	'discount': 0.9314149194071298	'lr': 0.0012984440893109082	'entropy': 0.09701647507780023}. Best is trial 4 with value: 92.10224914550781. [0m
[32m[I 2022-01-20 13:56:59	854] [0m Trial 12 finished with value: 104.38671875 and parameters: {'r_scaling': 0.5757598544339928	'unroll': 4	'update_epoch': 11	'discount': 0.9712826461492333	'lr': 0.00037437120732580276	'entropy': 0.0003420026149362511}. Best is trial 4 with value: 92.10224914550781. [0m
[32m[I 2022-01-20 14:00:40	579] [0m Trial 13 finished with value: 116.2806396484375 and parameters: {'r_scaling': 0.06294496361143341	'unroll': 1	'update_epoch': 14	'discount': 0.9934594393956077	'lr': 0.00064772814245446	'entropy': 0.0031378510883192665}. Best is trial 4 with value: 92.10224914550781. [0m
[32m[I 2022-01-20 14:04:11	831] [0m Trial 14 finished with value: 90.15319061279297 and parameters: {'r_scaling': 22.61950999688383	'unroll': 9	'update_epoch': 10	'discount': 0.9301662774989499	'lr': 0.0010211678602575684	'entropy': 0.0006726620117431754}. Best is trial 14 with value: 90.15319061279297. [0m
[32m[I 2022-01-20 14:07:40	858] [0m Trial 15 finished with value: 102.54268646240234 and parameters: {'r_scaling': 19.883423188600784	'unroll': 14	'update_epoch': 9	'discount': 0.9237160545997983	'lr': 0.001181550074598278	'entropy': 0.00011658080104380552}. Best is trial 14 with value: 90.15319061279297. [0m
[32m[I 2022-01-20 14:11:07	994] [0m Trial 16 finished with value: 109.71855926513672 and parameters: {'r_scaling': 168.40526060639706	'unroll': 9	'update_epoch': 10	'discount': 0.9110640071629522	'lr': 0.0002679251284735443	'entropy': 0.000400434682384636}. Best is trial 14 with value: 90.15319061279297. [0m
[32m[I 2022-01-20 14:14:33	453] [0m Trial 17 finished with value: 98.38394927978516 and parameters: {'r_scaling': 14.954386585109592	'unroll': 13	'update_epoch': 13	'discount': 0.934939388450945	'lr': 0.00010335067667847766	'entropy': 0.009062723074743635}. Best is trial 14 with value: 90.15319061279297. [0m
[32m[I 2022-01-20 14:18:02	490] [0m Trial 18 finished with value: 105.09466552734375 and parameters: {'r_scaling': 30.999011919474864	'unroll': 8	'update_epoch': 9	'discount': 0.9162690554585514	'lr': 0.0010106635125356346	'entropy': 0.005442724875903048}. Best is trial 14 with value: 90.15319061279297. [0m
[32m[I 2022-01-20 14:21:32	402] [0m Trial 19 finished with value: 102.41285705566406 and parameters: {'r_scaling': 0.16533518931949961	'unroll': 11	'update_epoch': 5	'discount': 0.900503714613726	'lr': 0.0004489914120786958	'entropy': 0.03325471529693396}. Best is trial 14 with value: 90.15319061279297. [0m
[32m[I 2022-01-20 14:24:33	321] [0m Trial 20 finished with value: 101.88887023925781 and parameters: {'r_scaling': 190.95940519910164	'unroll': 7	'update_epoch': 10	'discount': 0.9336378441185753	'lr': 0.0017965766450823324	'entropy': 0.09804033973244344}. Best is trial 14 with value: 90.15319061279297. [0m
[32m[I 2022-01-20 14:27:34	647] [0m Trial 21 finished with value: 95.56392669677734 and parameters: {'r_scaling': 1.0743563993031477	'unroll': 5	'update_epoch': 12	'discount': 0.9626701463511231	'lr': 0.0008490021444680035	'entropy': 0.0010330069420269445}. Best is trial 14 with value: 90.15319061279297. [0m
[32m[I 2022-01-20 14:31:03	074] [0m Trial 22 finished with value: 102.53994750976562 and parameters: {'r_scaling': 3.1502841620501827	'unroll': 6	'update_epoch': 13	'discount': 0.9403120245787626	'lr': 0.0005841065666668872	'entropy': 0.0004020682137538212}. Best is trial 14 with value: 90.15319061279297. [0m
[32m[I 2022-01-20 14:34:30	888] [0m Trial 23 finished with value: 103.71620178222656 and parameters: {'r_scaling': 0.6139654549631011	'unroll': 9	'update_epoch': 10	'discount': 0.9256257966601285	'lr': 0.00046652502572720327	'entropy': 0.0015449978546513872}. Best is trial 14 with value: 90.15319061279297. [0m
[32m[I 2022-01-20 14:38:01	846] [0m Trial 24 finished with value: 90.20637512207031 and parameters: {'r_scaling': 8.120792405286478	'unroll': 4	'update_epoch': 1	'discount': 0.9182597376641658	'lr': 0.0009152856444543789	'entropy': 0.000536005141490404}. Best is trial 14 with value: 90.15319061279297. [0m
[32m[I 2022-01-20 14:41:30	255] [0m Trial 25 finished with value: 98.06159973144531 and parameters: {'r_scaling': 7.945945086470811	'unroll': 3	'update_epoch': 2	'discount': 0.9181328959550764	'lr': 0.0015102063685982978	'entropy': 0.0002891190601225847}. Best is trial 14 with value: 90.15319061279297. [0m
[32m[I 2022-01-20 14:44:29	362] [0m Trial 26 finished with value: 100.0545654296875 and parameters: {'r_scaling': 12.461501810524158	'unroll': 7	'update_epoch': 4	'discount': 0.9079857203508893	'lr': 0.001000716042592486	'entropy': 0.0006188218402894867}. Best is trial 14 with value: 90.15319061279297. [0m
[32m[I 2022-01-20 14:48:00	262] [0m Trial 27 finished with value: 105.13189697265625 and parameters: {'r_scaling': 34.46741492698336	'unroll': 12	'update_epoch': 1	'discount': 0.9182041228126144	'lr': 0.0008687215924625788	'entropy': 0.0017343182471684703}. Best is trial 14 with value: 90.15319061279297. [0m
[32m[I 2022-01-20 14:51:02	592] [0m Trial 28 finished with value: 97.30974578857422 and parameters: {'r_scaling': 3.9614736425159487	'unroll': 9	'update_epoch': 8	'discount': 0.9281428375360987	'lr': 0.00029666342020350525	'entropy': 0.0002078973740649012}. Best is trial 14 with value: 90.15319061279297. [0m
[32m[I 2022-01-20 14:54:22	704] [0m Trial 29 finished with value: 107.83540344238281 and parameters: {'r_scaling': 80.97014895330997	'unroll': 2	'update_epoch': 9	'discount': 0.9068158102939338	'lr': 0.001428686378259674	'entropy': 0.0005993795840665444}. Best is trial 14 with value: 90.15319061279297. [0m
[32m[I 2022-01-20 14:57:54	312] [0m Trial 30 finished with value: 105.88136291503906 and parameters: {'r_scaling': 5.856145125422527	'unroll': 4	'update_epoch': 7	'discount': 0.9187681612816865	'lr': 0.0002420090524869933	'entropy': 0.005599737440720136}. Best is trial 14 with value: 90.15319061279297. [0m
[32m[I 2022-01-20 15:01:22	488] [0m Trial 31 finished with value: 96.55435180664062 and parameters: {'r_scaling': 2.108363394413056	'unroll': 5	'update_epoch': 11	'discount': 0.982289204948413	'lr': 0.0005892604656391989	'entropy': 0.0022112970611123084}. Best is trial 14 with value: 90.15319061279297. [0m
[32m[I 2022-01-20 15:04:53	125] [0m Trial 32 finished with value: 95.88362121582031 and parameters: {'r_scaling': 2.084996764609784	'unroll': 6	'update_epoch': 12	'discount': 0.9379778599905567	'lr': 0.0005118001355026375	'entropy': 0.0006737280626515807}. Best is trial 14 with value: 90.15319061279297. [0m
[32m[I 2022-01-20 15:08:23	054] [0m Trial 33 finished with value: 112.14132690429688 and parameters: {'r_scaling': 0.7248107846426393	'unroll': 4	'update_epoch': 13	'discount': 0.9921176558801403	'lr': 0.0008022216767838111	'entropy': 0.00569571054729244}. Best is trial 14 with value: 90.15319061279297. [0m
[32m[I 2022-01-20 15:11:50	223] [0m Trial 34 finished with value: 102.3006820678711 and parameters: {'r_scaling': 0.21457657233012997	'unroll': 3	'update_epoch': 9	'discount': 0.9425923257525188	'lr': 0.0010250080417950106	'entropy': 0.0008308105558660819}. Best is trial 14 with value: 90.15319061279297. [0m
[32m[I 2022-01-20 15:15:18	660] [0m Trial 35 finished with value: 100.08660125732422 and parameters: {'r_scaling': 5.4332690018892515	'unroll': 6	'update_epoch': 11	'discount': 0.9534259897312294	'lr': 0.00013537642956390283	'entropy': 0.0005064314725535424}. Best is trial 14 with value: 90.15319061279297. [0m
[32m[I 2022-01-20 15:18:15	927] [0m Trial 36 finished with value: 103.04237365722656 and parameters: {'r_scaling': 25.070404359182707	'unroll': 7	'update_epoch': 8	'discount': 0.9699175609473448	'lr': 0.0007136838722801633	'entropy': 0.00022687896541402785}. Best is trial 14 with value: 90.15319061279297. [0m
[32m[I 2022-01-20 15:21:41	728] [0m Trial 37 finished with value: 98.36322021484375 and parameters: {'r_scaling': 10.123351726497386	'unroll': 10	'update_epoch': 15	'discount': 0.9135101117066111	'lr': 0.00020346619995078777	'entropy': 0.0012131521227986366}. Best is trial 14 with value: 90.15319061279297. [0m
[32m[I 2022-01-20 15:25:15	630] [0m Trial 38 finished with value: 98.28334045410156 and parameters: {'r_scaling': 0.39994471015318833	'unroll': 5	'update_epoch': 6	'discount': 0.9211214686848763	'lr': 0.0003627878748777992	'entropy': 0.038708866063086274}. Best is trial 14 with value: 90.15319061279297. [0m
[32m[I 2022-01-20 15:28:43	169] [0m Trial 39 finished with value: 101.00859069824219 and parameters: {'r_scaling': 2.290443058973425	'unroll': 3	'update_epoch': 3	'discount': 0.9837772091446026	'lr': 0.000529217654058468	'entropy': 0.019262362307270083}. Best is trial 14 with value: 90.15319061279297. [0m
[32m[I 2022-01-20 15:32:10	330] [0m Trial 40 finished with value: 96.1243896484375 and parameters: {'r_scaling': 1.156028629504526	'unroll': 10	'update_epoch': 14	'discount': 0.9295137759021529	'lr': 0.0011203899615407102	'entropy': 0.00010614836786766318}. Best is trial 14 with value: 90.15319061279297. [0m
[32m[I 2022-01-20 15:35:41	022] [0m Trial 41 finished with value: 103.81324005126953 and parameters: {'r_scaling': 1.1591515005571544	'unroll': 5	'update_epoch': 12	'discount': 0.9602143649888795	'lr': 0.0008361343906176888	'entropy': 0.0009637058499214305}. Best is trial 14 with value: 90.15319061279297. [0m
[32m[I 2022-01-20 15:39:07	982] [0m Trial 42 finished with value: 93.76548767089844 and parameters: {'r_scaling': 0.8994930329720957	'unroll': 8	'update_epoch': 10	'discount': 0.977043226598866	'lr': 0.0009193380737231331	'entropy': 0.001123679873552111}. Best is trial 14 with value: 90.15319061279297. [0m
[32m[I 2022-01-20 15:42:33	374] [0m Trial 43 finished with value: 103.17929077148438 and parameters: {'r_scaling': 0.12912365079960883	'unroll': 8	'update_epoch': 10	'discount': 0.9777319559547586	'lr': 0.0007062128448815697	'entropy': 0.0019423768905715126}. Best is trial 14 with value: 90.15319061279297. [0m
[32m[I 2022-01-20 15:46:05	057] [0m Trial 44 finished with value: 99.28925323486328 and parameters: {'r_scaling': 0.7365123112589298	'unroll': 7	'update_epoch': 11	'discount': 0.9870932272835127	'lr': 0.0009326924139593943	'entropy': 0.003700247775233691}. Best is trial 14 with value: 90.15319061279297. [0m
[32m[I 2022-01-20 15:49:28	612] [0m Trial 45 finished with value: 101.98057556152344 and parameters: {'r_scaling': 0.4192012114838468	'unroll': 8	'update_epoch': 7	'discount': 0.9879761272981483	'lr': 0.0012872943622972623	'entropy': 0.001336192644408997}. Best is trial 14 with value: 90.15319061279297. [0m
[32m[I 2022-01-20 15:52:53	455] [0m Trial 46 finished with value: 91.00859832763672 and parameters: {'r_scaling': 48.673525447282415	'unroll': 9	'update_epoch': 10	'discount': 0.9782365935417852	'lr': 0.0007549893176280789	'entropy': 0.0023587581365183594}. Best is trial 14 with value: 90.15319061279297. [0m
[32m[I 2022-01-20 15:55:54	907] [0m Trial 47 finished with value: 105.50360107421875 and parameters: {'r_scaling': 50.70410549924588	'unroll': 10	'update_epoch': 8	'discount': 0.9654941520127699	'lr': 0.0016861198715535657	'entropy': 0.0037575083057986083}. Best is trial 14 with value: 90.15319061279297. [0m
[32m[I 2022-01-20 15:58:55	980] [0m Trial 48 finished with value: 93.92088317871094 and parameters: {'r_scaling': 98.36553802254474	'unroll': 9	'update_epoch': 10	'discount': 0.9761522293310605	'lr': 0.001144455481905728	'entropy': 0.002728015452978236}. Best is trial 14 with value: 90.15319061279297. [0m
[32m[I 2022-01-20 16:02:31	042] [0m Trial 49 finished with value: 94.699951171875 and parameters: {'r_scaling': 46.75707226210934	'unroll': 12	'update_epoch': 9	'discount': 0.9053149745419443	'lr': 0.000745201680219986	'entropy': 0.05437385269571176}. Best is trial 14 with value: 90.15319061279297. [0m
[32m[I 2022-01-20 16:06:06	516] [0m Trial 50 finished with value: 101.45989990234375 and parameters: {'r_scaling': 15.358532995621168	'unroll': 8	'update_epoch': 5	'discount': 0.9545473316498916	'lr': 0.00012325967858418002	'entropy': 0.01467663312904279}. Best is trial 14 with value: 90.15319061279297. [0m
[32m[I 2022-01-20 16:09:44	789] [0m Trial 51 finished with value: 106.33853149414062 and parameters: {'r_scaling': 80.68546355382837	'unroll': 9	'update_epoch': 10	'discount': 0.9783787350260171	'lr': 0.0011519343348698273	'entropy': 0.0025516552752586066}. Best is trial 14 with value: 90.15319061279297. [0m
[32m[I 2022-01-20 16:13:20	113] [0m Trial 52 finished with value: 100.04295349121094 and parameters: {'r_scaling': 105.27965516832482	'unroll': 9	'update_epoch': 10	'discount': 0.9700219672395961	'lr': 0.001452677187971804	'entropy': 0.00757882968227474}. Best is trial 14 with value: 90.15319061279297. [0m
[32m[I 2022-01-20 16:16:58	043] [0m Trial 53 finished with value: 94.69137573242188 and parameters: {'r_scaling': 20.431010630755342	'unroll': 11	'update_epoch': 9	'discount': 0.9747264856355963	'lr': 0.0019733467037062187	'entropy': 0.0004827088969228235}. Best is trial 14 with value: 90.15319061279297. [0m
[32m[I 2022-01-20 16:20:00	875] [0m Trial 54 finished with value: 106.86123657226562 and parameters: {'r_scaling': 104.90727790113847	'unroll': 9	'update_epoch': 11	'discount': 0.9119468161391991	'lr': 0.0012780337565940548	'entropy': 0.0029159867735342295}. Best is trial 14 with value: 90.15319061279297. [0m
[32m[I 2022-01-20 16:23:39	176] [0m Trial 55 finished with value: 98.67526245117188 and parameters: {'r_scaling': 37.4153987557152	'unroll': 10	'update_epoch': 8	'discount': 0.9812723144376713	'lr': 0.0009441964680240729	'entropy': 0.0011927586637298245}. Best is trial 14 with value: 90.15319061279297. [0m
[32m[I 2022-01-20 16:27:13	188] [0m Trial 56 finished with value: 102.06297302246094 and parameters: {'r_scaling': 131.72439485723856	'unroll': 8	'update_epoch': 10	'discount': 0.9661213182618524	'lr': 0.0010878479232236107	'entropy': 0.0016319306965277443}. Best is trial 14 with value: 90.15319061279297. [0m
[32m[I 2022-01-20 16:30:48	593] [0m Trial 57 finished with value: 98.95709228515625 and parameters: {'r_scaling': 63.95596906517556	'unroll': 11	'update_epoch': 9	'discount': 0.9744159845468998	'lr': 0.0016366879055809652	'entropy': 0.00427740574833915}. Best is trial 14 with value: 90.15319061279297. [0m
[32m[I 2022-01-20 16:34:22	099] [0m Trial 58 finished with value: 105.75186157226562 and parameters: {'r_scaling': 22.93509639045276	'unroll': 7	'update_epoch': 11	'discount': 0.9219484076535039	'lr': 0.0006580853655342234	'entropy': 0.008656144436972114}. Best is trial 14 with value: 90.15319061279297. [0m
[32m[I 2022-01-20 16:38:00	286] [0m Trial 59 finished with value: 98.87335968017578 and parameters: {'r_scaling': 7.508451750902627	'unroll': 8	'update_epoch': 1	'discount': 0.9151163447162369	'lr': 0.0008876664195498658	'entropy': 0.0003042709546430674}. Best is trial 14 with value: 90.15319061279297. [0m
[32m[I 2022-01-20 16:41:33	842] [0m Trial 60 finished with value: 107.23114013671875 and parameters: {'r_scaling': 12.14420221393853	'unroll': 12	'update_epoch': 7	'discount': 0.9487893996417165	'lr': 0.0007822918830914129	'entropy': 0.002390913364170115}. Best is trial 14 with value: 90.15319061279297. [0m
[32m[I 2022-01-20 16:45:11	049] [0m Trial 61 finished with value: 106.65050506591797 and parameters: {'r_scaling': 18.030242554583552	'unroll': 11	'update_epoch': 9	'discount': 0.9736695743196486	'lr': 0.0012579224739273584	'entropy': 0.0005668733696704772}. Best is trial 14 with value: 90.15319061279297. [0m
[32m[I 2022-01-20 16:48:18	967] [0m Trial 62 finished with value: 97.7381591796875 and parameters: {'r_scaling': 30.081397334824008	'unroll': 10	'update_epoch': 10	'discount': 0.9787369143231699	'lr': 0.0017852464928588704	'entropy': 0.00047282768863364766}. Best is trial 14 with value: 90.15319061279297. [0m
[32m[I 2022-01-20 16:52:11	881] [0m Trial 63 finished with value: -599.3427734375 and parameters: {'r_scaling': 36.313509532103375	'unroll': 1	'update_epoch': 9	'discount': 0.9662847119111969	'lr': 0.0015625714030172103	'entropy': 0.0007711521897838759}. Best is trial 63 with value: -599.3427734375. [0m
[32m[I 2022-01-20 16:56:14	998] [0m Trial 64 finished with value: -1231.5863037109375 and parameters: {'r_scaling': 41.42423492238448	'unroll': 1	'update_epoch': 12	'discount': 0.9267971228475879	'lr': 0.0014178033718621127	'entropy': 0.0008550082394965263}. Best is trial 64 with value: -1231.5863037109375. [0m
[32m[I 2022-01-20 17:00:15	256] [0m Trial 65 finished with value: -651.3792724609375 and parameters: {'r_scaling': 40.37556541034123	'unroll': 1	'update_epoch': 12	'discount': 0.9262739067479752	'lr': 0.001422811179472908	'entropy': 0.0009230346871472047}. Best is trial 64 with value: -1231.5863037109375. [0m
[32m[I 2022-01-20 17:04:12	842] [0m Trial 66 finished with value: -291.7850341796875 and parameters: {'r_scaling': 41.969554055376186	'unroll': 1	'update_epoch': 14	'discount': 0.9271241556337898	'lr': 0.0015714412806952906	'entropy': 0.0007466295965131904}. Best is trial 64 with value: -1231.5863037109375. [0m
[32m[I 2022-01-20 17:08:11	598] [0m Trial 67 finished with value: -11.023148536682129 and parameters: {'r_scaling': 42.90835873219041	'unroll': 1	'update_epoch': 14	'discount': 0.9267563433915854	'lr': 0.0015804570079356159	'entropy': 0.0008004377284463591}. Best is trial 64 with value: -1231.5863037109375. [0m
[32m[I 2022-01-20 17:11:41	572] [0m Trial 68 finished with value: 113.26029968261719 and parameters: {'r_scaling': 37.713302837491426	'unroll': 1	'update_epoch': 14	'discount': 0.9338982275689427	'lr': 0.0015786281900866696	'entropy': 0.0007609400006631866}. Best is trial 64 with value: -1231.5863037109375. [0m
[32m[I 2022-01-20 17:15:21	481] [0m Trial 69 finished with value: 103.53983306884766 and parameters: {'r_scaling': 26.667251172114568	'unroll': 2	'update_epoch': 13	'discount': 0.9280577391595848	'lr': 0.0014066170508215405	'entropy': 0.00037320590718327516}. Best is trial 64 with value: -1231.5863037109375. [0m
[32m[I 2022-01-20 17:18:39	552] [0m Trial 70 finished with value: 121.24113464355469 and parameters: {'r_scaling': 67.50745208310683	'unroll': 1	'update_epoch': 14	'discount': 0.9249984265515693	'lr': 0.0019690377329437767	'entropy': 0.0007806408222753595}. Best is trial 64 with value: -1231.5863037109375. [0m
[32m[I 2022-01-20 17:22:13	557] [0m Trial 71 finished with value: 101.90339660644531 and parameters: {'r_scaling': 46.06668212721515	'unroll': 2	'update_epoch': 13	'discount': 0.9369538535676889	'lr': 0.0013792657469358467	'entropy': 0.00091744472986756}. Best is trial 64 with value: -1231.5863037109375. [0m
[32m[I 2022-01-20 17:25:56	996] [0m Trial 72 finished with value: -835.2852783203125 and parameters: {'r_scaling': 40.29344480252879	'unroll': 1	'update_epoch': 15	'discount': 0.9315692221748431	'lr': 0.001549277383340003	'entropy': 0.0014380109718220646}. Best is trial 64 with value: -1231.5863037109375. [0m
[32m[I 2022-01-20 17:29:54	318] [0m Trial 73 finished with value: 122.47029113769531 and parameters: {'r_scaling': 15.860293309107057	'unroll': 1	'update_epoch': 15	'discount': 0.9306903530096754	'lr': 0.0017371942568856213	'entropy': 0.0006802592580168389}. Best is trial 64 with value: -1231.5863037109375. [0m
[32m[I 2022-01-20 17:33:21	286] [0m Trial 74 finished with value: 101.25202941894531 and parameters: {'r_scaling': 65.00275205970182	'unroll': 2	'update_epoch': 15	'discount': 0.9268950387916257	'lr': 0.0015197383110661545	'entropy': 0.0013720922221940191}. Best is trial 64 with value: -1231.5863037109375. [0m
[32m[I 2022-01-20 17:37:06	035] [0m Trial 75 finished with value: 117.0335693359375 and parameters: {'r_scaling': 38.93176035043699	'unroll': 1	'update_epoch': 14	'discount': 0.9451691958340419	'lr': 0.0015883594357265938	'entropy': 0.0010006303698537101}. Best is trial 64 with value: -1231.5863037109375. [0m
[32m[I 2022-01-20 17:40:44	480] [0m Trial 76 finished with value: 99.68338012695312 and parameters: {'r_scaling': 30.962995361333494	'unroll': 2	'update_epoch': 13	'discount': 0.9212563707385791	'lr': 0.0013569756674747834	'entropy': 0.0002663210467884964}. Best is trial 64 with value: -1231.5863037109375. [0m
[32m[I 2022-01-20 17:44:38	760] [0m Trial 77 finished with value: 117.01722717285156 and parameters: {'r_scaling': 23.349058869487465	'unroll': 1	'update_epoch': 15	'discount': 0.9234324819925074	'lr': 0.0018259244320240388	'entropy': 0.0004362440073075237}. Best is trial 64 with value: -1231.5863037109375. [0m
[32m[I 2022-01-20 17:48:20	995] [0m Trial 78 finished with value: 103.07832336425781 and parameters: {'r_scaling': 10.94744248219795	'unroll': 3	'update_epoch': 14	'discount': 0.9321576636095352	'lr': 0.0012157924300704999	'entropy': 0.0005636017543374976}. Best is trial 64 with value: -1231.5863037109375. [0m
[32m[I 2022-01-20 17:52:12	647] [0m Trial 79 finished with value: 122.89649963378906 and parameters: {'r_scaling': 159.45545990207944	'unroll': 1	'update_epoch': 12	'discount': 0.9398045886723274	'lr': 0.0015060623324903038	'entropy': 0.0006897577910941719}. Best is trial 64 with value: -1231.5863037109375. [0m
[32m[I 2022-01-20 17:55:19	535] [0m Trial 80 finished with value: 98.01254272460938 and parameters: {'r_scaling': 56.24804766444352	'unroll': 3	'update_epoch': 12	'discount': 0.9181573226134313	'lr': 0.0010795224007600003	'entropy': 0.0014808709227254427}. Best is trial 64 with value: -1231.5863037109375. [0m
[32m[I 2022-01-20 17:59:10	760] [0m Trial 81 finished with value: 124.3683090209961 and parameters: {'r_scaling': 51.60106396221687	'unroll': 1	'update_epoch': 13	'discount': 0.9293940198528828	'lr': 0.0013255077676402418	'entropy': 0.0019524994665628063}. Best is trial 64 with value: -1231.5863037109375. [0m
[32m[I 2022-01-20 18:02:45	156] [0m Trial 82 finished with value: 103.36265563964844 and parameters: {'r_scaling': 41.20155590830142	'unroll': 2	'update_epoch': 15	'discount': 0.936350939430744	'lr': 0.0016154006156029418	'entropy': 0.0008374340063764795}. Best is trial 64 with value: -1231.5863037109375. [0m
[32m[I 2022-01-20 18:06:14	762] [0m Trial 83 finished with value: 93.80126953125 and parameters: {'r_scaling': 75.38675484880521	'unroll': 2	'update_epoch': 14	'discount': 0.9326062073547429	'lr': 0.0011975349265339493	'entropy': 0.0010546349425978104}. Best is trial 64 with value: -1231.5863037109375. [0m
[32m[I 2022-01-20 18:10:09	358] [0m Trial 84 finished with value: 117.13652801513672 and parameters: {'r_scaling': 31.6908096221819	'unroll': 1	'update_epoch': 11	'discount': 0.9265082764707745	'lr': 0.0010288672774138863	'entropy': 0.0019371560947353096}. Best is trial 64 with value: -1231.5863037109375. [0m
[32m[I 2022-01-20 18:13:44	254] [0m Trial 85 finished with value: 101.08440399169922 and parameters: {'r_scaling': 4.401085975906574	'unroll': 4	'update_epoch': 12	'discount': 0.9231680398899558	'lr': 0.0018862337628369622	'entropy': 0.00015625269562550596}. Best is trial 64 with value: -1231.5863037109375. [0m
[32m[I 2022-01-20 18:17:31	376] [0m Trial 86 finished with value: 120.70669555664062 and parameters: {'r_scaling': 26.933839208677597	'unroll': 1	'update_epoch': 13	'discount': 0.9209087209569832	'lr': 0.00040756737586823184	'entropy': 0.0005412632904349189}. Best is trial 64 with value: -1231.5863037109375. [0m
[32m[I 2022-01-20 18:21:00	522] [0m Trial 87 finished with value: 105.18806457519531 and parameters: {'r_scaling': 19.296445054412192	'unroll': 2	'update_epoch': 15	'discount': 0.925476786808596	'lr': 0.0016946955338872011	'entropy': 0.00034169847713928607}. Best is trial 64 with value: -1231.5863037109375. [0m
[32m[I 2022-01-20 18:24:26	371] [0m Trial 88 finished with value: 97.57271575927734 and parameters: {'r_scaling': 57.58016924223855	'unroll': 3	'update_epoch': 8	'discount': 0.9354120506189829	'lr': 0.0009729447645445423	'entropy': 0.0008848758762848626}. Best is trial 64 with value: -1231.5863037109375. [0m
[32m[I 2022-01-20 18:27:51	770] [0m Trial 89 finished with value: 105.77393341064453 and parameters: {'r_scaling': 96.03248865282039	'unroll': 2	'update_epoch': 14	'discount': 0.9157244202193239	'lr': 0.0014561117920549474	'entropy': 0.0006601164204405667}. Best is trial 64 with value: -1231.5863037109375. [0m
[32m[I 2022-01-20 18:31:43	804] [0m Trial 90 finished with value: 130.92405700683594 and parameters: {'r_scaling': 131.89167224592927	'unroll': 1	'update_epoch': 4	'discount': 0.9098294579521796	'lr': 0.0013571205241480072	'entropy': 0.0012173360611919346}. Best is trial 64 with value: -1231.5863037109375. [0m
[32m[I 2022-01-20 18:34:46	047] [0m Trial 91 finished with value: 96.43069458007812 and parameters: {'r_scaling': 42.508386251497754	'unroll': 6	'update_epoch': 12	'discount': 0.9194978867638844	'lr': 0.0002122730001940838	'entropy': 0.07964628943219863}. Best is trial 64 with value: -1231.5863037109375. [0m
[32m[I 2022-01-20 18:37:56	874] [0m Trial 92 finished with value: 121.41084289550781 and parameters: {'r_scaling': 1.5462299258996708	'unroll': 1	'update_epoch': 11	'discount': 0.9288577255836312	'lr': 0.0010798859739444176	'entropy': 0.0017062740398182438}. Best is trial 64 with value: -1231.5863037109375. [0m
[32m[I 2022-01-20 18:41:31	365] [0m Trial 93 finished with value: 97.71441650390625 and parameters: {'r_scaling': 14.082197183762764	'unroll': 2	'update_epoch': 10	'discount': 0.9041753161448337	'lr': 0.00015331738030740927	'entropy': 0.0007455645256400641}. Best is trial 64 with value: -1231.5863037109375. [0m
[32m[I 2022-01-20 18:45:03	921] [0m Trial 94 finished with value: 101.62535095214844 and parameters: {'r_scaling': 0.08746018518133376	'unroll': 4	'update_epoch': 9	'discount': 0.9141037346527487	'lr': 0.001525046131841807	'entropy': 0.028424134337706013}. Best is trial 64 with value: -1231.5863037109375. [0m
[32m[I 2022-01-20 18:48:08	403] [0m Trial 95 finished with value: 99.83285522460938 and parameters: {'r_scaling': 35.40837999473705	'unroll': 3	'update_epoch': 2	'discount': 0.9165747112135468	'lr': 0.0011742262362595423	'entropy': 0.0010716494688893356}. Best is trial 64 with value: -1231.5863037109375. [0m
[32m[I 2022-01-20 18:51:59	545] [0m Trial 96 finished with value: 123.52415466308594 and parameters: {'r_scaling': 2.6403216868804553	'unroll': 1	'update_epoch': 11	'discount': 0.9432396514815449	'lr': 0.0018644469593976421	'entropy': 0.00041173567218175}. Best is trial 64 with value: -1231.5863037109375. [0m
[32m[I 2022-01-20 18:55:12	301] [0m Trial 97 finished with value: 96.60513305664062 and parameters: {'r_scaling': 7.183970123476936	'unroll': 15	'update_epoch': 8	'discount': 0.9311988921484717	'lr': 0.0012742257783583222	'entropy': 0.0013023159149659822}. Best is trial 64 with value: -1231.5863037109375. [0m
[32m[I 2022-01-20 18:58:27	346] [0m Trial 98 finished with value: -833.1648559570312 and parameters: {'r_scaling': 9.27047025808868	'unroll': 1	'update_epoch': 9	'discount': 0.9905042291056261	'lr': 0.0002884052682198441	'entropy': 0.0022147490946711626}. Best is trial 64 with value: -1231.5863037109375. [0m
[32m[I 2022-01-20 19:02:03	284] [0m Trial 99 finished with value: 100.15184783935547 and parameters: {'r_scaling': 21.240658897190734	'unroll': 2	'update_epoch': 6	'discount': 0.9897917913994202	'lr': 0.0005079260177362544	'entropy': 0.0032604848213319444}. Best is trial 64 with value: -1231.5863037109375. [0m
[32m[I 2022-01-20 19:05:20	820] [0m Trial 100 finished with value: 119.32865142822266 and parameters: {'r_scaling': 6.081449586373023	'unroll': 1	'update_epoch': 9	'discount': 0.9563375703568728	'lr': 0.0005850410099054546	'entropy': 0.00200789446060371}. Best is trial 64 with value: -1231.5863037109375. [0m
[32m[I 2022-01-20 19:09:14	145] [0m Trial 101 finished with value: -110.7191162109375 and parameters: {'r_scaling': 10.277985129917543	'unroll': 1	'update_epoch': 10	'discount': 0.9124176831742878	'lr': 0.0002638422467123941	'entropy': 0.004703207221190718}. Best is trial 64 with value: -1231.5863037109375. [0m
[32m[I 2022-01-20 19:13:08	920] [0m Trial 102 finished with value: -655.5704345703125 and parameters: {'r_scaling': 3.7811498683529616	'unroll': 1	'update_epoch': 9	'discount': 0.9844964405271741	'lr': 0.0003115734784102658	'entropy': 0.002290725717840058}. Best is trial 64 with value: -1231.5863037109375. [0m
[32m[I 2022-01-20 19:16:39	574] [0m Trial 103 finished with value: 124.24292755126953 and parameters: {'r_scaling': 9.530105461732903	'unroll': 1	'update_epoch': 8	'discount': 0.992426537267998	'lr': 0.0002902137899137934	'entropy': 0.004611465654904126}. Best is trial 64 with value: -1231.5863037109375. [0m
[32m[I 2022-01-20 19:20:31	785] [0m Trial 104 finished with value: -346.00775146484375 and parameters: {'r_scaling': 3.5872463793410096	'unroll': 1	'update_epoch': 9	'discount': 0.9945434343837044	'lr': 0.00025894051064295564	'entropy': 0.006942252251741345}. Best is trial 64 with value: -1231.5863037109375. [0m
[32m[I 2022-01-20 19:24:24	296] [0m Trial 105 finished with value: -977.823486328125 and parameters: {'r_scaling': 4.177868915817023	'unroll': 1	'update_epoch': 9	'discount': 0.9906947927815568	'lr': 0.00025155177883313105	'entropy': 0.007039529229366485}. Best is trial 64 with value: -1231.5863037109375. [0m
[32m[I 2022-01-20 19:28:18	187] [0m Trial 106 finished with value: -291.60174560546875 and parameters: {'r_scaling': 3.2594290647332658	'unroll': 1	'update_epoch': 9	'discount': 0.9902997637762179	'lr': 0.00023187123960133265	'entropy': 0.006632626731794026}. Best is trial 64 with value: -1231.5863037109375. [0m
[32m[I 2022-01-20 19:31:56	047] [0m Trial 107 finished with value: 100.17631530761719 and parameters: {'r_scaling': 3.6537426261743873	'unroll': 2	'update_epoch': 9	'discount': 0.9905702838676896	'lr': 0.00024137050616825401	'entropy': 0.006687302087918461}. Best is trial 64 with value: -1231.5863037109375. [0m
[32m[I 2022-01-20 19:35:43	212] [0m Trial 108 finished with value: -710.62646484375 and parameters: {'r_scaling': 2.675317816083397	'unroll': 1	'update_epoch': 9	'discount': 0.983592240883472	'lr': 0.0002460945978464299	'entropy': 0.0049121889172700755}. Best is trial 64 with value: -1231.5863037109375. [0m
[32m[I 2022-01-20 19:39:17	164] [0m Trial 109 finished with value: 103.8425064086914 and parameters: {'r_scaling': 2.862889837384786	'unroll': 2	'update_epoch': 8	'discount': 0.9844897217466578	'lr': 0.00023896775999726608	'entropy': 0.010681237107781816}. Best is trial 64 with value: -1231.5863037109375. [0m
[32m[I 2022-01-20 19:43:04	877] [0m Trial 110 finished with value: -470.4232177734375 and parameters: {'r_scaling': 3.393336545208239	'unroll': 1	'update_epoch': 9	'discount': 0.993735876818645	'lr': 0.0003058445384456028	'entropy': 0.006226391772988421}. Best is trial 64 with value: -1231.5863037109375. [0m
[32m[I 2022-01-20 19:47:03	910] [0m Trial 111 finished with value: -971.26953125 and parameters: {'r_scaling': 1.8742466210302169	'unroll': 1	'update_epoch': 9	'discount': 0.9862247023652697	'lr': 0.00032512315072103317	'entropy': 0.006421501118397246}. Best is trial 64 with value: -1231.5863037109375. [0m
[32m[I 2022-01-20 19:50:46	399] [0m Trial 112 finished with value: 123.77218627929688 and parameters: {'r_scaling': 1.835882060465348	'unroll': 1	'update_epoch': 9	'discount': 0.9943655602151108	'lr': 0.00032144180952334067	'entropy': 0.011490081405155107}. Best is trial 64 with value: -1231.5863037109375. [0m
[32m[I 2022-01-20 19:54:36	381] [0m Trial 113 finished with value: 111.016845703125 and parameters: {'r_scaling': 1.4585044265881226	'unroll': 1	'update_epoch': 9	'discount': 0.9868627056812688	'lr': 0.00031964501229997557	'entropy': 0.00703256355842808}. Best is trial 64 with value: -1231.5863037109375. [0m
[32m[I 2022-01-20 19:58:12	116] [0m Trial 114 finished with value: 103.29936218261719 and parameters: {'r_scaling': 2.4860076415954984	'unroll': 2	'update_epoch': 8	'discount': 0.9811155461236858	'lr': 0.0002644896428205169	'entropy': 0.005393552025511152}. Best is trial 64 with value: -1231.5863037109375. [0m
[32m[I 2022-01-20 20:01:57	979] [0m Trial 115 finished with value: -612.5902709960938 and parameters: {'r_scaling': 4.634149138044365	'unroll': 1	'update_epoch': 7	'discount': 0.9884291415035539	'lr': 0.00028615983787384216	'entropy': 0.009563093363556789}. Best is trial 64 with value: -1231.5863037109375. [0m
[32m[I 2022-01-20 20:05:31	732] [0m Trial 116 finished with value: 102.64974975585938 and parameters: {'r_scaling': 4.619384749966686	'unroll': 2	'update_epoch': 7	'discount': 0.9885191258930682	'lr': 0.00028325122407218544	'entropy': 0.009096437197821548}. Best is trial 64 with value: -1231.5863037109375. [0m
[32m[I 2022-01-20 20:09:17	250] [0m Trial 117 finished with value: -87.50611877441406 and parameters: {'r_scaling': 1.9512294909568915	'unroll': 1	'update_epoch': 7	'discount': 0.9851434900927608	'lr': 0.0001862641053540471	'entropy': 0.01706623092393753}. Best is trial 64 with value: -1231.5863037109375. [0m
[32m[I 2022-01-20 20:13:07	090] [0m Trial 118 finished with value: -442.31964111328125 and parameters: {'r_scaling': 3.41213402754643	'unroll': 1	'update_epoch': 7	'discount': 0.99434614235367	'lr': 0.0003389407381549031	'entropy': 0.0035953168729006735}. Best is trial 64 with value: -1231.5863037109375. [0m
[32m[I 2022-01-20 20:16:55	889] [0m Trial 119 finished with value: 101.44181823730469 and parameters: {'r_scaling': 5.436569572307525	'unroll': 2	'update_epoch': 7	'discount': 0.982636789918769	'lr': 0.0003693581374662599	'entropy': 0.00354310014210659}. Best is trial 64 with value: -1231.5863037109375. [0m
[32m[I 2022-01-20 20:20:44	242] [0m Trial 120 finished with value: 114.72273254394531 and parameters: {'r_scaling': 4.193315031855765	'unroll': 1	'update_epoch': 6	'discount': 0.9915676609630171	'lr': 0.0004076673647238924	'entropy': 0.005301028298739538}. Best is trial 64 with value: -1231.5863037109375. [0m
[32m[I 2022-01-20 20:24:33	526] [0m Trial 121 finished with value: -480.05126953125 and parameters: {'r_scaling': 3.4962226658431943	'unroll': 1	'update_epoch': 6	'discount': 0.9948571767424952	'lr': 0.0003323180148763476	'entropy': 0.006047535706111636}. Best is trial 64 with value: -1231.5863037109375. [0m
[32m[I 2022-01-20 20:28:25	200] [0m Trial 122 finished with value: 124.22891235351562 and parameters: {'r_scaling': 2.9663497931688636	'unroll': 1	'update_epoch': 6	'discount': 0.9883910425677415	'lr': 0.00033807537977566314	'entropy': 0.004358920906350728}. Best is trial 64 with value: -1231.5863037109375. [0m
[32m[I 2022-01-20 20:32:05	610] [0m Trial 123 finished with value: 106.03556823730469 and parameters: {'r_scaling': 6.522475917120788	'unroll': 2	'update_epoch': 5	'discount': 0.9932729659600766	'lr': 0.00034470490945016447	'entropy': 0.00819079097475384}. Best is trial 64 with value: -1231.5863037109375. [0m
[32m[I 2022-01-20 20:35:56	197] [0m Trial 124 finished with value: 120.91758728027344 and parameters: {'r_scaling': 2.2533033085137095	'unroll': 1	'update_epoch': 7	'discount': 0.9865847357878043	'lr': 0.00031217900159792746	'entropy': 0.006181081986851322}. Best is trial 64 with value: -1231.5863037109375. [0m
[32m[I 2022-01-20 20:39:34	220] [0m Trial 125 finished with value: 98.75668334960938 and parameters: {'r_scaling': 4.790353567211205	'unroll': 2	'update_epoch': 8	'discount': 0.9919452865019337	'lr': 0.0003956332053426356	'entropy': 0.010550992823912012}. Best is trial 64 with value: -1231.5863037109375. [0m
[32m[I 2022-01-20 20:43:24	280] [0m Trial 126 finished with value: -24.216381072998047 and parameters: {'r_scaling': 3.389092609425022	'unroll': 1	'update_epoch': 6	'discount': 0.9947723700604879	'lr': 0.00030155056101034667	'entropy': 0.0030381929865287262}. Best is trial 64 with value: -1231.5863037109375. [0m
[32m[I 2022-01-20 20:47:32	318] [0m Trial 127 finished with value: 122.786376953125 and parameters: {'r_scaling': 1.8139333459471791	'unroll': 1	'update_epoch': 8	'discount': 0.9897780060416065	'lr': 0.0002817491182511042	'entropy': 0.012535887784872121}. Best is trial 64 with value: -1231.5863037109375. [0m
[32m[I 2022-01-20 20:51:06	729] [0m Trial 128 finished with value: 102.91797637939453 and parameters: {'r_scaling': 5.073930204161598	'unroll': 2	'update_epoch': 6	'discount': 0.9798896692895512	'lr': 0.0003455272502405797	'entropy': 0.003825983661973439}. Best is trial 64 with value: -1231.5863037109375. [0m
[32m[I 2022-01-20 20:54:36	628] [0m Trial 129 finished with value: 103.24916076660156 and parameters: {'r_scaling': 0.9835119599874316	'unroll': 3	'update_epoch': 5	'discount': 0.9882026481092419	'lr': 0.0002524903639934163	'entropy': 0.008171513612014852}. Best is trial 64 with value: -1231.5863037109375. [0m
[32m[I 2022-01-20 20:57:50	801] [0m Trial 130 finished with value: 124.09490966796875 and parameters: {'r_scaling': 4.070037156496322	'unroll': 1	'update_epoch': 10	'discount': 0.9851846444556466	'lr': 0.00027686840725761705	'entropy': 0.0026745796047719745}. Best is trial 64 with value: -1231.5863037109375. [0m
[32m[I 2022-01-20 21:01:43	105] [0m Trial 131 finished with value: -585.0005493164062 and parameters: {'r_scaling': 3.8818381874027845	'unroll': 1	'update_epoch': 9	'discount': 0.9942045235284636	'lr': 0.00025177253015399784	'entropy': 0.005142308437687764}. Best is trial 64 with value: -1231.5863037109375. [0m
[32m[I 2022-01-20 21:05:21	058] [0m Trial 132 finished with value: 110.02696990966797 and parameters: {'r_scaling': 2.639671872370719	'unroll': 14	'update_epoch': 9	'discount': 0.9830995604163892	'lr': 0.0003024868546843586	'entropy': 0.005271646137009631}. Best is trial 64 with value: -1231.5863037109375. [0m
[32m[I 2022-01-20 21:09:08	736] [0m Trial 133 finished with value: -769.8889770507812 and parameters: {'r_scaling': 3.0757940468684013	'unroll': 1	'update_epoch': 7	'discount': 0.9919473312468344	'lr': 0.0002182489143805861	'entropy': 0.00598224733324927}. Best is trial 64 with value: -1231.5863037109375. [0m
[32m[I 2022-01-20 21:12:45	799] [0m Trial 134 finished with value: 96.55680084228516 and parameters: {'r_scaling': 3.0149779351999473	'unroll': 2	'update_epoch': 8	'discount': 0.992123803946136	'lr': 0.00021957480669630632	'entropy': 0.006207494409099305}. Best is trial 64 with value: -1231.5863037109375. [0m
[32m[I 2022-01-20 21:16:33	550] [0m Trial 135 finished with value: 93.50839233398438 and parameters: {'r_scaling': 2.1744090299629653	'unroll': 1	'update_epoch': 9	'discount': 0.9891468571943036	'lr': 0.00020030031603389268	'entropy': 0.0049361051463300614}. Best is trial 64 with value: -1231.5863037109375. [0m
[32m[I 2022-01-20 21:20:25	442] [0m Trial 136 finished with value: 118.60873413085938 and parameters: {'r_scaling': 1.34754832174234	'unroll': 1	'update_epoch': 10	'discount': 0.9909956904387751	'lr': 0.00023200596255325173	'entropy': 0.010208801201632716}. Best is trial 64 with value: -1231.5863037109375. [0m
[32m[I 2022-01-20 21:24:29	178] [0m Trial 137 finished with value: 69.014892578125 and parameters: {'r_scaling': 1.726690729036174	'unroll': 1	'update_epoch': 9	'discount': 0.9868666027621	'lr': 0.00017392161372550605	'entropy': 0.009547890575591998}. Best is trial 64 with value: -1231.5863037109375. [0m
[32m[I 2022-01-20 21:28:12	973] [0m Trial 138 finished with value: 121.90711975097656 and parameters: {'r_scaling': 8.471044656630598	'unroll': 1	'update_epoch': 8	'discount': 0.9849239471860884	'lr': 0.0002123884284025901	'entropy': 0.004026071013123622}. Best is trial 64 with value: -1231.5863037109375. [0m
[32m[I 2022-01-20 21:31:41	311] [0m Trial 139 finished with value: 101.42972564697266 and parameters: {'r_scaling': 6.289521810251847	'unroll': 2	'update_epoch': 9	'discount': 0.9515372357174682	'lr': 0.0002482031161262837	'entropy': 0.0015119838303600769}. Best is trial 64 with value: -1231.5863037109375. [0m
[32m[I 2022-01-20 21:35:32	094] [0m Trial 140 finished with value: 121.98916625976562 and parameters: {'r_scaling': 4.0608596961268875	'unroll': 1	'update_epoch': 10	'discount': 0.9926118437028046	'lr': 0.0002256987596045041	'entropy': 0.007886099086535803}. Best is trial 64 with value: -1231.5863037109375. [0m
[32m[I 2022-01-20 21:39:27	554] [0m Trial 141 finished with value: 121.30691528320312 and parameters: {'r_scaling': 3.5242417250159637	'unroll': 1	'update_epoch': 7	'discount': 0.994638460530736	'lr': 0.0003288009210479481	'entropy': 0.003450443178204179}. Best is trial 64 with value: -1231.5863037109375. [0m
[32m[I 2022-01-20 21:43:19	928] [0m Trial 142 finished with value: -339.261962890625 and parameters: {'r_scaling': 2.3499136329902037	'unroll': 1	'update_epoch': 7	'discount': 0.9930505389980242	'lr': 0.00026913990912568765	'entropy': 0.0023834750244095173}. Best is trial 64 with value: -1231.5863037109375. [0m
[32m[I 2022-01-20 21:46:56	984] [0m Trial 143 finished with value: 109.27412414550781 and parameters: {'r_scaling': 5.447009798644522	'unroll': 2	'update_epoch': 6	'discount': 0.9902448339608767	'lr': 0.0003822343118588095	'entropy': 0.005963522243152908}. Best is trial 64 with value: -1231.5863037109375. [0m
[32m[I 2022-01-20 21:50:48	282] [0m Trial 144 finished with value: -128.3848876953125 and parameters: {'r_scaling': 3.140072380798925	'unroll': 1	'update_epoch': 7	'discount': 0.9866532486739608	'lr': 0.0003561694397885226	'entropy': 0.004139246529033687}. Best is trial 64 with value: -1231.5863037109375. [0m
[32m[I 2022-01-20 21:54:06	093] [0m Trial 145 finished with value: -771.6689453125 and parameters: {'r_scaling': 2.696056320116701	'unroll': 1	'update_epoch': 9	'discount': 0.9881628133384344	'lr': 0.0002797609191262495	'entropy': 0.007384857132505177}. Best is trial 64 with value: -1231.5863037109375. [0m
[32m[I 2022-01-20 21:58:18	153] [0m Trial 146 finished with value: -577.6903076171875 and parameters: {'r_scaling': 4.616361541970185	'unroll': 1	'update_epoch': 9	'discount': 0.9725544914308452	'lr': 0.00029424736638537503	'entropy': 0.007293373248218898}. Best is trial 64 with value: -1231.5863037109375. [0m
[32m[I 2022-01-20 22:01:59	363] [0m Trial 147 finished with value: 105.88145446777344 and parameters: {'r_scaling': 4.594135703176026	'unroll': 2	'update_epoch': 9	'discount': 0.9810911288804753	'lr': 0.0002902447872340881	'entropy': 0.007571703939692556}. Best is trial 64 with value: -1231.5863037109375. [0m
[32m[I 2022-01-20 22:05:31	682] [0m Trial 148 finished with value: 99.76904296875 and parameters: {'r_scaling': 2.3390103828231905	'unroll': 2	'update_epoch': 8	'discount': 0.966214764034269	'lr': 0.0004314957089619832	'entropy': 0.016056222911662647}. Best is trial 64 with value: -1231.5863037109375. [0m
[32m[I 2022-01-20 22:09:22	901] [0m Trial 149 finished with value: 119.56842041015625 and parameters: {'r_scaling': 2.806401754330076	'unroll': 1	'update_epoch': 10	'discount': 0.9714756645969452	'lr': 0.0002564770679816714	'entropy': 0.009215406249749687}. Best is trial 64 with value: -1231.5863037109375. [0m
[32m[I 2022-01-20 22:13:18	478] [0m Trial 150 finished with value: -162.911376953125 and parameters: {'r_scaling': 7.062385886296166	'unroll': 1	'update_epoch': 9	'discount': 0.9838216892009688	'lr': 0.00019949912152730865	'entropy': 0.012616571171477879}. Best is trial 64 with value: -1231.5863037109375. [0m
[32m[I 2022-01-20 22:16:43	536] [0m Trial 151 finished with value: 123.38922882080078 and parameters: {'r_scaling': 4.247448757208572	'unroll': 1	'update_epoch': 9	'discount': 0.9598182785257721	'lr': 0.00030719911618587155	'entropy': 0.005972294490223895}. Best is trial 64 with value: -1231.5863037109375. [0m
[32m[I 2022-01-20 22:20:38	297] [0m Trial 152 finished with value: 119.26025390625 and parameters: {'r_scaling': 5.248034792818873	'unroll': 1	'update_epoch': 9	'discount': 0.9888298094220769	'lr': 0.0002785264006792962	'entropy': 0.007266079424917201}. Best is trial 64 with value: -1231.5863037109375. [0m
[32m[I 2022-01-20 22:24:33	924] [0m Trial 153 finished with value: 119.0313720703125 and parameters: {'r_scaling': 3.7778508966410596	'unroll': 1	'update_epoch': 8	'discount': 0.9631034021493751	'lr': 0.00029717664093222896	'entropy': 0.005419970300721663}. Best is trial 64 with value: -1231.5863037109375. [0m
[32m[I 2022-01-20 22:28:27	793] [0m Trial 154 finished with value: 113.91165161132812 and parameters: {'r_scaling': 2.690323971843247	'unroll': 1	'update_epoch': 9	'discount': 0.9912401640108099	'lr': 0.0002415856286834296	'entropy': 0.0069138952603184116}. Best is trial 64 with value: -1231.5863037109375. [0m
[32m[I 2022-01-20 22:31:36	523] [0m Trial 155 finished with value: 103.78312683105469 and parameters: {'r_scaling': 1.6515598092071155	'unroll': 2	'update_epoch': 10	'discount': 0.9876930781581066	'lr': 0.0002744896283138581	'entropy': 0.004442453775454079}. Best is trial 64 with value: -1231.5863037109375. [0m
[32m[I 2022-01-20 22:35:32	948] [0m Trial 156 finished with value: -167.24290466308594 and parameters: {'r_scaling': 2.115232528681017	'unroll': 1	'update_epoch': 9	'discount': 0.9858554940014045	'lr': 0.00031931856453336506	'entropy': 0.008713069147690844}. Best is trial 64 with value: -1231.5863037109375. [0m
[32m[I 2022-01-20 22:38:55	793] [0m Trial 157 finished with value: 104.6671371459961 and parameters: {'r_scaling': 3.0140758097397353	'unroll': 2	'update_epoch': 8	'discount': 0.9836216899502956	'lr': 0.0002579053739899327	'entropy': 0.004890557167467864}. Best is trial 64 with value: -1231.5863037109375. [0m
[32m[I 2022-01-20 22:42:17	025] [0m Trial 158 finished with value: -331.78375244140625 and parameters: {'r_scaling': 3.7784705189031205	'unroll': 1	'update_epoch': 9	'discount': 0.9901709282008514	'lr': 0.00021929633671648318	'entropy': 0.006247501038715556}. Best is trial 64 with value: -1231.5863037109375. [0m
[32m[I 2022-01-20 22:46:19	728] [0m Trial 159 finished with value: -439.11700439453125 and parameters: {'r_scaling': 5.868294392989647	'unroll': 1	'update_epoch': 10	'discount': 0.9799197056526701	'lr': 0.00029494400720669043	'entropy': 0.002893383358870552}. Best is trial 64 with value: -1231.5863037109375. [0m
[32m[I 2022-01-20 22:50:30	426] [0m Trial 160 finished with value: 106.2762451171875 and parameters: {'r_scaling': 4.822399225305924	'unroll': 2	'update_epoch': 9	'discount': 0.9949065638790605	'lr': 0.00018328420259200941	'entropy': 0.002133094650133807}. Best is trial 64 with value: -1231.5863037109375. [0m
[32m[I 2022-01-20 22:54:34	084] [0m Trial 161 finished with value: 127.31613159179688 and parameters: {'r_scaling': 3.3290254238862023	'unroll': 1	'update_epoch': 8	'discount': 0.993845340231551	'lr': 0.0003586273127990532	'entropy': 0.0057107844990246515}. Best is trial 64 with value: -1231.5863037109375. [0m
[32m[I 2022-01-20 22:58:36	623] [0m Trial 162 finished with value: -84.0972900390625 and parameters: {'r_scaling': 2.4991374997199434	'unroll': 1	'update_epoch': 7	'discount': 0.9891359301964551	'lr': 0.0003219078900572913	'entropy': 0.0018160327221881508}. Best is trial 64 with value: -1231.5863037109375. [0m
[32m[I 2022-01-20 23:02:35	736] [0m Trial 163 finished with value: 126.12112426757812 and parameters: {'r_scaling': 3.4804905845867418	'unroll': 1	'update_epoch': 8	'discount': 0.9922553958051381	'lr': 0.0002703428907621568	'entropy': 0.007792662550381201}. Best is trial 64 with value: -1231.5863037109375. [0m
[32m[I 2022-01-20 23:06:52	966] [0m Trial 164 finished with value: 52.70225524902344 and parameters: {'r_scaling': 28.317712501129066	'unroll': 1	'update_epoch': 9	'discount': 0.9949745673805136	'lr': 0.0003371543976932229	'entropy': 0.006606352703878401}. Best is trial 64 with value: -1231.5863037109375. [0m
[32m[I 2022-01-20 23:11:02	443] [0m Trial 165 finished with value: -1.6144256591796875 and parameters: {'r_scaling': 3.974899957388999	'unroll': 1	'update_epoch': 7	'discount': 0.9764170730615771	'lr': 0.00030862734486674395	'entropy': 0.0009177886557780446}. Best is trial 64 with value: -1231.5863037109375. [0m
[32m[I 2022-01-20 23:14:14	994] [0m Trial 166 finished with value: 106.95326232910156 and parameters: {'r_scaling': 2.915518435713193	'unroll': 2	'update_epoch': 6	'discount': 0.9917656735447192	'lr': 0.0002474587848911969	'entropy': 0.0031822621625490844}. Best is trial 64 with value: -1231.5863037109375. [0m
[32m[I 2022-01-20 23:18:25	552] [0m Trial 167 finished with value: -1603.173583984375 and parameters: {'r_scaling': 1.9255940338189583	'unroll': 1	'update_epoch': 10	'discount': 0.987337263804616	'lr': 0.0003797932766753956	'entropy': 0.004929125179823997}. Best is trial 167 with value: -1603.173583984375. [0m
[32m[I 2022-01-20 23:22:39	905] [0m Trial 168 finished with value: 19.172439575195312 and parameters: {'r_scaling': 1.2066177384704693	'unroll': 1	'update_epoch': 9	'discount': 0.9823933353408146	'lr': 0.0003906140571804604	'entropy': 0.0047861082960873064}. Best is trial 167 with value: -1603.173583984375. [0m
[32m[I 2022-01-20 23:26:50	216] [0m Trial 169 finished with value: 102.90782165527344 and parameters: {'r_scaling': 1.4864394195189006	'unroll': 2	'update_epoch': 10	'discount': 0.9860513756926924	'lr': 0.0002957282333111647	'entropy': 0.008419103957866842}. Best is trial 167 with value: -1603.173583984375. [0m
[32m[I 2022-01-20 23:30:57	927] [0m Trial 170 finished with value: -81.24595642089844 and parameters: {'r_scaling': 1.9420832742450735	'unroll': 1	'update_epoch': 10	'discount': 0.9877199577569751	'lr': 0.00043371765404621516	'entropy': 0.0053989816117741805}. Best is trial 167 with value: -1603.173583984375. [0m
[32m[I 2022-01-20 23:35:03	930] [0m Trial 171 finished with value: 111.59915161132812 and parameters: {'r_scaling': 2.5262068246036162	'unroll': 1	'update_epoch': 11	'discount': 0.990361896715071	'lr': 0.00037002184194983537	'entropy': 0.0037149297423743977}. Best is trial 167 with value: -1603.173583984375. [0m
[32m[I 2022-01-20 23:39:07	528] [0m Trial 172 finished with value: 121.13021850585938 and parameters: {'r_scaling': 35.117260786462204	'unroll': 1	'update_epoch': 9	'discount': 0.9926575832102301	'lr': 0.0003307679918460372	'entropy': 0.004515119051575907}. Best is trial 167 with value: -1603.173583984375. [0m
[32m[I 2022-01-20 23:43:06	419] [0m Trial 173 finished with value: 127.22984313964844 and parameters: {'r_scaling': 4.48557979738376	'unroll': 1	'update_epoch': 8	'discount': 0.9885798212962699	'lr': 0.0003512033100448447	'entropy': 0.007160054480749656}. Best is trial 167 with value: -1603.173583984375. [0m
[32m[I 2022-01-20 23:47:01	328] [0m Trial 174 finished with value: -921.3613891601562 and parameters: {'r_scaling': 55.71930598306364	'unroll': 1	'update_epoch': 9	'discount': 0.9852247820572112	'lr': 0.000276990987261685	'entropy': 0.0041660986976918965}. Best is trial 167 with value: -1603.173583984375. [0m
[32m[I 2022-01-20 23:51:05	838] [0m Trial 175 finished with value: 118.00907897949219 and parameters: {'r_scaling': 52.369008207498986	'unroll': 1	'update_epoch': 9	'discount': 0.9848926551126057	'lr': 0.00028212635338860923	'entropy': 0.0060091595110708385}. Best is trial 167 with value: -1603.173583984375. [0m
[32m[I 2022-01-20 23:55:08	202] [0m Trial 176 finished with value: -825.3480834960938 and parameters: {'r_scaling': 71.98058084444689	'unroll': 1	'update_epoch': 9	'discount': 0.9823531299916911	'lr': 0.00023492442280583737	'entropy': 0.005114039823248056}. Best is trial 167 with value: -1603.173583984375. [0m
[32m[I 2022-01-20 23:59:22	880] [0m Trial 177 finished with value: 95.89234161376953 and parameters: {'r_scaling': 37.93957106645351	'unroll': 2	'update_epoch': 10	'discount': 0.9722668111777936	'lr': 0.0002578095045644101	'entropy': 0.003990376938691302}. Best is trial 167 with value: -1603.173583984375. [0m
[32m[I 2022-01-21 00:03:26	943] [0m Trial 178 finished with value: 122.79263305664062 and parameters: {'r_scaling': 83.38448640771716	'unroll': 1	'update_epoch': 9	'discount': 0.9685414082489657	'lr': 0.0002379048748978968	'entropy': 0.00109804899175219}. Best is trial 167 with value: -1603.173583984375. [0m
[32m[I 2022-01-21 00:07:29	662] [0m Trial 179 finished with value: 103.59583282470703 and parameters: {'r_scaling': 68.5195721985695	'unroll': 2	'update_epoch': 9	'discount': 0.9834646344455007	'lr': 0.00027090490793582427	'entropy': 0.004582253194251465}. Best is trial 167 with value: -1603.173583984375. [0m
[32m[I 2022-01-21 00:11:48	170] [0m Trial 180 finished with value: 117.01600646972656 and parameters: {'r_scaling': 57.782027945691965	'unroll': 1	'update_epoch': 8	'discount': 0.9801796684393987	'lr': 0.00022636724449046693	'entropy': 0.0013744588253235908}. Best is trial 167 with value: -1603.173583984375. [0m
[32m[I 2022-01-21 00:15:53	028] [0m Trial 181 finished with value: 124.59190368652344 and parameters: {'r_scaling': 49.96403183943317	'unroll': 1	'update_epoch': 9	'discount': 0.9862168458616156	'lr': 0.00028651060914348594	'entropy': 0.005209919662462621}. Best is trial 167 with value: -1603.173583984375. [0m
[32m[I 2022-01-21 00:19:56	375] [0m Trial 182 finished with value: 119.6366195678711 and parameters: {'r_scaling': 75.0560877421251	'unroll': 1	'update_epoch': 9	'discount': 0.9820785477204735	'lr': 0.0014470830048195968	'entropy': 0.005891637697025825}. Best is trial 167 with value: -1603.173583984375. [0m
[32m[I 2022-01-21 00:23:57	141] [0m Trial 183 finished with value: 114.88093566894531 and parameters: {'r_scaling': 62.9056534687955	'unroll': 1	'update_epoch': 9	'discount': 0.9878161220243378	'lr': 0.00031110953892267803	'entropy': 0.009599252643372526}. Best is trial 167 with value: -1603.173583984375. [0m
[32m[I 2022-01-21 00:27:58	190] [0m Trial 184 finished with value: 122.21533203125 and parameters: {'r_scaling': 43.15044582919114	'unroll': 1	'update_epoch': 10	'discount': 0.9787295820340796	'lr': 0.00025050848302084845	'entropy': 0.0064065889912002}. Best is trial 167 with value: -1603.173583984375. [0m
[32m[I 2022-01-21 00:32:04	520] [0m Trial 185 finished with value: 65.48077392578125 and parameters: {'r_scaling': 2.0066130672351075	'unroll': 1	'update_epoch': 9	'discount': 0.9908040749610838	'lr': 0.0002050969153342908	'entropy': 0.007547664567476822}. Best is trial 167 with value: -1603.173583984375. [0m
[32m[I 2022-01-21 00:36:09	577] [0m Trial 186 finished with value: -713.5396728515625 and parameters: {'r_scaling': 3.033986658458678	'unroll': 1	'update_epoch': 8	'discount': 0.9234312977635555	'lr': 0.0002665946060218278	'entropy': 0.005171426331933939}. Best is trial 167 with value: -1603.173583984375. [0m
[32m[I 2022-01-21 00:39:22	856] [0m Trial 187 finished with value: 101.11023712158203 and parameters: {'r_scaling': 2.4946183642181383	'unroll': 2	'update_epoch': 12	'discount': 0.923133474271539	'lr': 0.0002366089612218656	'entropy': 0.005100121758974315}. Best is trial 167 with value: -1603.173583984375. [0m
[32m[I 2022-01-21 00:42:47	997] [0m Trial 188 finished with value: 55.559967041015625 and parameters: {'r_scaling': 118.37655806916472	'unroll': 1	'update_epoch': 8	'discount': 0.9282146650237372	'lr': 0.00026349389493464663	'entropy': 0.002519729537533467}. Best is trial 167 with value: -1603.173583984375. [0m
[32m[I 2022-01-21 00:46:54	437] [0m Trial 189 finished with value: -177.8047332763672 and parameters: {'r_scaling': 2.1722337239057787	'unroll': 1	'update_epoch': 8	'discount': 0.9844630521383448	'lr': 0.00027247743614056987	'entropy': 0.004138225776459828}. Best is trial 167 with value: -1603.173583984375. [0m
[32m[I 2022-01-21 00:50:59	377] [0m Trial 190 finished with value: 105.31743621826172 and parameters: {'r_scaling': 2.916198648329872	'unroll': 2	'update_epoch': 10	'discount': 0.9244749241839227	'lr': 0.0016581174194253106	'entropy': 0.0033106601148268243}. Best is trial 167 with value: -1603.173583984375. [0m
[32m[I 2022-01-21 00:55:24	186] [0m Trial 191 finished with value: -213.3721923828125 and parameters: {'r_scaling': 3.805898903879993	'unroll': 1	'update_epoch': 9	'discount': 0.9892675921595243	'lr': 0.00029482510567415494	'entropy': 0.006792926594305701}. Best is trial 167 with value: -1603.173583984375. [0m
[32m[I 2022-01-21 00:59:34	730] [0m Trial 192 finished with value: -30.044870376586914 and parameters: {'r_scaling': 5.008323365017767	'unroll': 1	'update_epoch': 9	'discount': 0.9865828149017426	'lr': 0.0003113470987504397	'entropy': 0.004976119007823592}. Best is trial 167 with value: -1603.173583984375. [0m
[32m[I 2022-01-21 01:03:41	301] [0m Trial 193 finished with value: 124.10102081298828 and parameters: {'r_scaling': 3.0663644476594554	'unroll': 1	'update_epoch': 8	'discount': 0.992541660442482	'lr': 0.0002512264812745596	'entropy': 0.005675327218707917}. Best is trial 167 with value: -1603.173583984375. [0m
[32m[I 2022-01-21 01:07:45	852] [0m Trial 194 finished with value: -10.527692794799805 and parameters: {'r_scaling': 32.58971900943164	'unroll': 1	'update_epoch': 9	'discount': 0.9219597596134811	'lr': 0.00022532338297002368	'entropy': 0.011367664394095384}. Best is trial 167 with value: -1603.173583984375. [0m
[32m[I 2022-01-21 01:11:51	974] [0m Trial 195 finished with value: 124.70885467529297 and parameters: {'r_scaling': 1.7563746564470974	'unroll': 1	'update_epoch': 9	'discount': 0.9900442905281108	'lr': 0.00028151384171868184	'entropy': 0.008887698383902666}. Best is trial 167 with value: -1603.173583984375. [0m
[32m[I 2022-01-21 01:16:01	953] [0m Trial 196 finished with value: -85.02149963378906 and parameters: {'r_scaling': 4.266657084121847	'unroll': 1	'update_epoch': 5	'discount': 0.9882658667094769	'lr': 0.00032468840018795727	'entropy': 0.004199301967491435}. Best is trial 167 with value: -1603.173583984375. [0m
[32m[I 2022-01-21 01:20:05	329] [0m Trial 197 finished with value: 103.44465637207031 and parameters: {'r_scaling': 46.518781369349085	'unroll': 2	'update_epoch': 8	'discount': 0.9264563551109901	'lr': 0.00030149049859790647	'entropy': 0.00747489685234039}. Best is trial 167 with value: -1603.173583984375. [0m
[32m[I 2022-01-21 01:24:25	684] [0m Trial 198 finished with value: 127.11114501953125 and parameters: {'r_scaling': 3.3823278720148093	'unroll': 1	'update_epoch': 10	'discount': 0.9861285873204979	'lr': 0.0004719912479330109	'entropy': 0.0006281716352969005}. Best is trial 167 with value: -1603.173583984375. [0m
[32m[I 2022-01-21 01:28:41	163] [0m Trial 199 finished with value: 112.51519775390625 and parameters: {'r_scaling': 5.853088825776303	'unroll': 1	'update_epoch': 9	'discount': 0.9820479036161135	'lr': 0.0002449260494641327	'entropy': 0.000957974513850701}. Best is trial 167 with value: -1603.173583984375. [0m
