# Supplementary material
Source: ML conference proceedings conference paper supplement (https://proceedings.neurips.cc/paper_files/paper/2022/hash/10a6bdcabbd5a3d36b760daa295f63c1-Abstract.html)
Supplement: Supplementary file 1 [file 10a6bdcabbd5a3d36b760daa295f63c1-Supplemental-Conference.zip › neurips2022/code/robotics_code/hp_searches/halfcheetah_300K_less.log]

[32m[I 2022-01-20 13:05:55	240] [0m A new study created in memory with name: no-name-589e274f-44b1-4448-b04b-5d3252929cc8 [0m
[32m[I 2022-01-20 13:09:12	192] [0m Trial 0 finished with value: 108.5496826171875 and parameters: {'r_scaling': 0.4960022306740836	'unroll': 12	'update_epoch': 9	'discount': 0.9498034275744184	'lr': 0.0008955763805267104	'entropy': 0.022383081146420902}. Best is trial 0 with value: 108.5496826171875. [0m
[32m[I 2022-01-20 13:12:22	368] [0m Trial 1 finished with value: 118.65390014648438 and parameters: {'r_scaling': 91.84195702038717	'unroll': 10	'update_epoch': 1	'discount': 0.9894670779632069	'lr': 0.00010696842643302872	'entropy': 0.0025533308040863113}. Best is trial 0 with value: 108.5496826171875. [0m
[32m[I 2022-01-20 13:15:45	790] [0m Trial 2 finished with value: 115.60360717773438 and parameters: {'r_scaling': 70.31310987863017	'unroll': 7	'update_epoch': 8	'discount': 0.9490182726396557	'lr': 0.001375739307203688	'entropy': 0.008027656909771221}. Best is trial 0 with value: 108.5496826171875. [0m
[32m[I 2022-01-20 13:18:31	378] [0m Trial 3 finished with value: 110.4047622680664 and parameters: {'r_scaling': 60.90120603409712	'unroll': 10	'update_epoch': 7	'discount': 0.985337240150712	'lr': 0.0005662885456169853	'entropy': 0.004329570888604306}. Best is trial 0 with value: 108.5496826171875. [0m
[32m[I 2022-01-20 13:21:40	941] [0m Trial 4 finished with value: 112.02433776855469 and parameters: {'r_scaling': 65.93457073064633	'unroll': 6	'update_epoch': 7	'discount': 0.964530976501123	'lr': 0.00025481247892363847	'entropy': 0.01612853256558754}. Best is trial 0 with value: 108.5496826171875. [0m
[32m[I 2022-01-20 13:24:53	971] [0m Trial 5 finished with value: 116.7000961303711 and parameters: {'r_scaling': 0.1678842797980518	'unroll': 8	'update_epoch': 5	'discount': 0.9918651467038817	'lr': 0.000751441182862206	'entropy': 0.00429607854907727}. Best is trial 0 with value: 108.5496826171875. [0m
[32m[I 2022-01-20 13:28:02	844] [0m Trial 6 finished with value: 115.6397476196289 and parameters: {'r_scaling': 0.6014481421626129	'unroll': 13	'update_epoch': 9	'discount': 0.9666560726625767	'lr': 0.001857694013487006	'entropy': 0.011913764907671156}. Best is trial 0 with value: 108.5496826171875. [0m
[32m[I 2022-01-20 13:31:18	598] [0m Trial 7 finished with value: 108.00679779052734 and parameters: {'r_scaling': 0.09506068473437014	'unroll': 13	'update_epoch': 15	'discount': 0.957978040914887	'lr': 0.0003478419553372461	'entropy': 0.02942676730588491}. Best is trial 7 with value: 108.00679779052734. [0m
[32m[I 2022-01-20 13:34:05	336] [0m Trial 8 finished with value: 113.58242797851562 and parameters: {'r_scaling': 5.333414686599234	'unroll': 7	'update_epoch': 3	'discount': 0.9183024856993959	'lr': 0.00036733709473796603	'entropy': 0.007242034443433424}. Best is trial 7 with value: 108.00679779052734. [0m
[32m[I 2022-01-20 13:37:10	983] [0m Trial 9 finished with value: 141.94314575195312 and parameters: {'r_scaling': 40.693046549622885	'unroll': 2	'update_epoch': 13	'discount': 0.9865651556453388	'lr': 0.00147213032093912	'entropy': 0.00026367076993524113}. Best is trial 7 with value: 108.00679779052734. [0m
[32m[I 2022-01-20 13:40:27	036] [0m Trial 10 finished with value: 107.81903839111328 and parameters: {'r_scaling': 0.08869078082474458	'unroll': 15	'update_epoch': 15	'discount': 0.9181206717308052	'lr': 0.0002063436425007536	'entropy': 0.08416750965345222}. Best is trial 10 with value: 107.81903839111328. [0m
[32m[I 2022-01-20 13:43:42	311] [0m Trial 11 finished with value: 108.46649169921875 and parameters: {'r_scaling': 0.05354050725155685	'unroll': 15	'update_epoch': 15	'discount': 0.9115850840953879	'lr': 0.0001839315558593862	'entropy': 0.07449746312811795}. Best is trial 10 with value: 107.81903839111328. [0m
[32m[I 2022-01-20 13:46:55	871] [0m Trial 12 finished with value: 114.06411743164062 and parameters: {'r_scaling': 0.05298554712134637	'unroll': 14	'update_epoch': 12	'discount': 0.927075060575669	'lr': 0.0001880701887793144	'entropy': 0.08615846786719648}. Best is trial 10 with value: 107.81903839111328. [0m
[32m[I 2022-01-20 13:50:11	053] [0m Trial 13 finished with value: 115.8427734375 and parameters: {'r_scaling': 2.568220453342844	'unroll': 11	'update_epoch': 15	'discount': 0.9019757050334583	'lr': 0.00034735618233524423	'entropy': 0.03328733872482669}. Best is trial 10 with value: 107.81903839111328. [0m
[32m[I 2022-01-20 13:53:21	525] [0m Trial 14 finished with value: 105.45879364013672 and parameters: {'r_scaling': 0.24423818547184908	'unroll': 15	'update_epoch': 12	'discount': 0.9328335342393543	'lr': 0.00011492759567887353	'entropy': 0.0011831623869118875}. Best is trial 14 with value: 105.45879364013672. [0m
[32m[I 2022-01-20 13:56:35	090] [0m Trial 15 finished with value: 112.89268493652344 and parameters: {'r_scaling': 0.3305296731016158	'unroll': 15	'update_epoch': 12	'discount': 0.9344944874345839	'lr': 0.00010065966916024397	'entropy': 0.0009354820554880022}. Best is trial 14 with value: 105.45879364013672. [0m
[32m[I 2022-01-20 13:59:45	886] [0m Trial 16 finished with value: 114.45759582519531 and parameters: {'r_scaling': 1.1817710753231268	'unroll': 4	'update_epoch': 13	'discount': 0.9344532465037724	'lr': 0.0001667895386084319	'entropy': 0.0010465339694303855}. Best is trial 14 with value: 105.45879364013672. [0m
[32m[I 2022-01-20 14:03:00	032] [0m Trial 17 finished with value: 111.13775634765625 and parameters: {'r_scaling': 9.257755167140155	'unroll': 15	'update_epoch': 11	'discount': 0.9199338625338004	'lr': 0.00013548007177669003	'entropy': 0.0001750254266318719}. Best is trial 14 with value: 105.45879364013672. [0m
[32m[I 2022-01-20 14:06:14	945] [0m Trial 18 finished with value: 117.03225708007812 and parameters: {'r_scaling': 0.20505880168608867	'unroll': 9	'update_epoch': 11	'discount': 0.9369890812144007	'lr': 0.00024426211632621654	'entropy': 0.000612785140616854}. Best is trial 14 with value: 105.45879364013672. [0m
[32m[I 2022-01-20 14:09:28	136] [0m Trial 19 finished with value: 111.80538940429688 and parameters: {'r_scaling': 1.323378480739822	'unroll': 12	'update_epoch': 14	'discount': 0.9136064656844586	'lr': 0.00025043519496215186	'entropy': 0.001929604617696325}. Best is trial 14 with value: 105.45879364013672. [0m
[32m[I 2022-01-20 14:12:15	059] [0m Trial 20 finished with value: 116.39178466796875 and parameters: {'r_scaling': 18.88877678950416	'unroll': 13	'update_epoch': 10	'discount': 0.9002713479867589	'lr': 0.00013218866726311522	'entropy': 0.0004228657571953663}. Best is trial 14 with value: 105.45879364013672. [0m
[32m[I 2022-01-20 14:15:27	220] [0m Trial 21 finished with value: 111.51586151123047 and parameters: {'r_scaling': 0.0925101911118453	'unroll': 13	'update_epoch': 15	'discount': 0.9598268731702914	'lr': 0.00045226226523048676	'entropy': 0.029976894799146184}. Best is trial 14 with value: 105.45879364013672. [0m
[32m[I 2022-01-20 14:18:38	178] [0m Trial 22 finished with value: 109.16590881347656 and parameters: {'r_scaling': 0.1322118072613923	'unroll': 14	'update_epoch': 13	'discount': 0.9433963294886385	'lr': 0.00030954923847221165	'entropy': 0.051669112877504926}. Best is trial 14 with value: 105.45879364013672. [0m
[32m[I 2022-01-20 14:21:50	281] [0m Trial 23 finished with value: 113.23336791992188 and parameters: {'r_scaling': 0.0982608987311047	'unroll': 15	'update_epoch': 14	'discount': 0.9742434965739933	'lr': 0.00014336767026218306	'entropy': 0.05449882805294029}. Best is trial 14 with value: 105.45879364013672. [0m
[32m[I 2022-01-20 14:25:04	115] [0m Trial 24 finished with value: 114.46080017089844 and parameters: {'r_scaling': 0.23836020034320565	'unroll': 12	'update_epoch': 14	'discount': 0.9268069387042225	'lr': 0.0002045847319438635	'entropy': 0.0015017199524548675}. Best is trial 14 with value: 105.45879364013672. [0m
[32m[I 2022-01-20 14:28:16	911] [0m Trial 25 finished with value: 112.22276306152344 and parameters: {'r_scaling': 0.8164054927618373	'unroll': 14	'update_epoch': 12	'discount': 0.9559800341206997	'lr': 0.0004038540200676883	'entropy': 0.04739575055182131}. Best is trial 14 with value: 105.45879364013672. [0m
[32m[I 2022-01-20 14:31:29	484] [0m Trial 26 finished with value: 113.92228698730469 and parameters: {'r_scaling': 0.3445730988472379	'unroll': 11	'update_epoch': 15	'discount': 0.9427584435754313	'lr': 0.0005951694380504252	'entropy': 0.017785421011784996}. Best is trial 14 with value: 105.45879364013672. [0m
[32m[I 2022-01-20 14:34:16	442] [0m Trial 27 finished with value: 117.06257629394531 and parameters: {'r_scaling': 0.08976572870198418	'unroll': 14	'update_epoch': 11	'discount': 0.9257350471664485	'lr': 0.0002907057510407053	'entropy': 0.09200168923012475}. Best is trial 14 with value: 105.45879364013672. [0m
[32m[I 2022-01-20 14:37:28	935] [0m Trial 28 finished with value: 115.77032470703125 and parameters: {'r_scaling': 1.902243309929902	'unroll': 13	'update_epoch': 14	'discount': 0.9748037954852353	'lr': 0.00012250584397822893	'entropy': 0.0001194216977021296}. Best is trial 14 with value: 105.45879364013672. [0m
[32m[I 2022-01-20 14:40:40	872] [0m Trial 29 finished with value: 116.36526489257812 and parameters: {'r_scaling': 0.44758350140649356	'unroll': 11	'update_epoch': 10	'discount': 0.9540556364837186	'lr': 0.0004980001903662042	'entropy': 0.025336648504011534}. Best is trial 14 with value: 105.45879364013672. [0m
[32m[I 2022-01-20 14:43:47	461] [0m Trial 30 finished with value: -1626.842041015625 and parameters: {'r_scaling': 0.052168602325206356	'unroll': 1	'update_epoch': 13	'discount': 0.9079037589050923	'lr': 0.00022153935748633273	'entropy': 0.007824406961690006}. Best is trial 30 with value: -1626.842041015625. [0m
[32m[I 2022-01-20 14:47:29	425] [0m Trial 31 finished with value: 133.61285400390625 and parameters: {'r_scaling': 0.054076778934688	'unroll': 1	'update_epoch': 13	'discount': 0.9067566380241054	'lr': 0.0002234667115507476	'entropy': 0.009047131766216908}. Best is trial 30 with value: -1626.842041015625. [0m
[32m[I 2022-01-20 14:51:09	654] [0m Trial 32 finished with value: -1136.778564453125 and parameters: {'r_scaling': 0.12890492345483895	'unroll': 3	'update_epoch': 15	'discount': 0.9196266597066562	'lr': 0.00016285694929215927	'entropy': 0.0031800406111462233}. Best is trial 30 with value: -1626.842041015625. [0m
[32m[I 2022-01-20 14:54:51	003] [0m Trial 33 finished with value: -1450.175048828125 and parameters: {'r_scaling': 0.21284535374588479	'unroll': 3	'update_epoch': 14	'discount': 0.9191759318426336	'lr': 0.00016046279520000767	'entropy': 0.002862368268937901}. Best is trial 30 with value: -1626.842041015625. [0m
[32m[I 2022-01-20 14:58:27	336] [0m Trial 34 finished with value: -2182.529296875 and parameters: {'r_scaling': 0.24353622314487255	'unroll': 3	'update_epoch': 12	'discount': 0.9079764691366419	'lr': 0.00016945463520048244	'entropy': 0.003051657151565085}. Best is trial 34 with value: -2182.529296875. [0m
[32m[I 2022-01-20 15:01:56	481] [0m Trial 35 finished with value: -1318.787353515625 and parameters: {'r_scaling': 0.14306642671292438	'unroll': 3	'update_epoch': 1	'discount': 0.9083356708108773	'lr': 0.00016154324658460142	'entropy': 0.0028878806842622595}. Best is trial 34 with value: -2182.529296875. [0m
[32m[I 2022-01-20 15:05:11	968] [0m Trial 36 finished with value: 111.63581085205078 and parameters: {'r_scaling': 145.85821836645232	'unroll': 5	'update_epoch': 6	'discount': 0.9076486910085373	'lr': 0.0001557995839378375	'entropy': 0.005842395181557622}. Best is trial 34 with value: -2182.529296875. [0m
[32m[I 2022-01-20 15:08:06	685] [0m Trial 37 finished with value: -1244.3699951171875 and parameters: {'r_scaling': 0.7265880001799739	'unroll': 1	'update_epoch': 1	'discount': 0.9055671946440346	'lr': 0.0002884039757275763	'entropy': 0.002733703264895351}. Best is trial 34 with value: -2182.529296875. [0m
[32m[I 2022-01-20 15:11:36	646] [0m Trial 38 finished with value: -1381.9498291015625 and parameters: {'r_scaling': 0.34291367242160464	'unroll': 3	'update_epoch': 4	'discount': 0.9147298845639877	'lr': 0.00017608153121662619	'entropy': 0.00435971296358613}. Best is trial 34 with value: -2182.529296875. [0m
[32m[I 2022-01-20 15:14:53	470] [0m Trial 39 finished with value: 114.9411392211914 and parameters: {'r_scaling': 0.4138431035630342	'unroll': 5	'update_epoch': 4	'discount': 0.9134401400508714	'lr': 0.00011317842248710421	'entropy': 0.004620865008855571}. Best is trial 34 with value: -2182.529296875. [0m
[32m[I 2022-01-20 15:17:48	989] [0m Trial 40 finished with value: -378.47998046875 and parameters: {'r_scaling': 4.486314451573727	'unroll': 2	'update_epoch': 8	'discount': 0.9142897998410922	'lr': 0.00018255280847347794	'entropy': 0.012045517128808726}. Best is trial 34 with value: -2182.529296875. [0m
[32m[I 2022-01-20 15:21:21	355] [0m Trial 41 finished with value: -1058.8583984375 and parameters: {'r_scaling': 0.17097705658730733	'unroll': 3	'update_epoch': 2	'discount': 0.9103838703562106	'lr': 0.00015601705220505703	'entropy': 0.0020672595373631484}. Best is trial 34 with value: -2182.529296875. [0m
[32m[I 2022-01-20 15:24:57	054] [0m Trial 42 finished with value: -1481.491943359375 and parameters: {'r_scaling': 0.1688250198536661	'unroll': 3	'update_epoch': 4	'discount': 0.9048207427810574	'lr': 0.0002262154610357051	'entropy': 0.004002329630029494}. Best is trial 34 with value: -2182.529296875. [0m
[32m[I 2022-01-20 15:28:29	247] [0m Trial 43 finished with value: 142.33303833007812 and parameters: {'r_scaling': 0.29534713176716676	'unroll': 2	'update_epoch': 6	'discount': 0.9042128183454214	'lr': 0.00023462124248412695	'entropy': 0.0053346280216969525}. Best is trial 34 with value: -2182.529296875. [0m
[32m[I 2022-01-20 15:31:47	690] [0m Trial 44 finished with value: 113.74410247802734 and parameters: {'r_scaling': 0.067538873052833	'unroll': 4	'update_epoch': 4	'discount': 0.9000303653482343	'lr': 0.0001990218988716718	'entropy': 0.009034760218571644}. Best is trial 34 with value: -2182.529296875. [0m
[32m[I 2022-01-20 15:35:01	291] [0m Trial 45 finished with value: 115.01453399658203 and parameters: {'r_scaling': 0.506583602123058	'unroll': 4	'update_epoch': 3	'discount': 0.9230021440456798	'lr': 0.0002693446693326283	'entropy': 0.004239073683657575}. Best is trial 34 with value: -2182.529296875. [0m
[32m[I 2022-01-20 15:38:14	516] [0m Trial 46 finished with value: 116.6774673461914 and parameters: {'r_scaling': 1.020182835605647	'unroll': 6	'update_epoch': 5	'discount': 0.917867742604401	'lr': 0.0009246014040447964	'entropy': 0.003480773152056093}. Best is trial 34 with value: -2182.529296875. [0m
[32m[I 2022-01-20 15:41:46	278] [0m Trial 47 finished with value: 142.60552978515625 and parameters: {'r_scaling': 0.2215680636386185	'unroll': 2	'update_epoch': 7	'discount': 0.9038374225818444	'lr': 0.0003317741595186692	'entropy': 0.006516137011300653}. Best is trial 34 with value: -2182.529296875. [0m
[32m[I 2022-01-20 15:45:16	265] [0m Trial 48 finished with value: -142.59414672851562 and parameters: {'r_scaling': 0.07120977037330235	'unroll': 1	'update_epoch': 3	'discount': 0.916623612587599	'lr': 0.00021907157626165167	'entropy': 0.012670436774948458}. Best is trial 34 with value: -2182.529296875. [0m
[32m[I 2022-01-20 15:48:39	387] [0m Trial 49 finished with value: 112.33160400390625 and parameters: {'r_scaling': 0.12404125561870977	'unroll': 5	'update_epoch': 9	'discount': 0.9226355309321692	'lr': 0.00018400929859353	'entropy': 0.0019080771716989738}. Best is trial 34 with value: -2182.529296875. [0m
[32m[I 2022-01-20 15:52:04	809] [0m Trial 50 finished with value: -1689.3243408203125 and parameters: {'r_scaling': 0.6454848523708139	'unroll': 3	'update_epoch': 5	'discount': 0.9102423037436688	'lr': 0.00012605590267883546	'entropy': 0.0007578153447400085}. Best is trial 34 with value: -2182.529296875. [0m
[32m[I 2022-01-20 15:55:01	313] [0m Trial 51 finished with value: -1451.131103515625 and parameters: {'r_scaling': 0.6093925070883396	'unroll': 3	'update_epoch': 5	'discount': 0.9097597928087259	'lr': 0.00012735843421401774	'entropy': 0.000559643900194306}. Best is trial 34 with value: -2182.529296875. [0m
[32m[I 2022-01-20 15:58:39	212] [0m Trial 52 finished with value: -797.0899047851562 and parameters: {'r_scaling': 0.561823856470396	'unroll': 2	'update_epoch': 5	'discount': 0.9102717790803467	'lr': 0.00013491352192883765	'entropy': 0.0006495495058904258}. Best is trial 34 with value: -2182.529296875. [0m
[32m[I 2022-01-20 16:01:55	840] [0m Trial 53 finished with value: 116.8934326171875 and parameters: {'r_scaling': 1.561859792214564	'unroll': 4	'update_epoch': 6	'discount': 0.9111878739431132	'lr': 0.0001081620909688329	'entropy': 0.00030015165546797777}. Best is trial 34 with value: -2182.529296875. [0m
[32m[I 2022-01-20 16:05:04	861] [0m Trial 54 finished with value: 114.4881820678711 and parameters: {'r_scaling': 0.6774143326252471	'unroll': 7	'update_epoch': 5	'discount': 0.9038410793244481	'lr': 0.00010064874028851048	'entropy': 0.0007117446635473443}. Best is trial 34 with value: -2182.529296875. [0m
[32m[I 2022-01-20 16:08:14	180] [0m Trial 55 finished with value: 113.92292022705078 and parameters: {'r_scaling': 0.8904113951238154	'unroll': 6	'update_epoch': 2	'discount': 0.9080079182235719	'lr': 0.00012477382524803666	'entropy': 0.0004410939029401958}. Best is trial 34 with value: -2182.529296875. [0m
[32m[I 2022-01-20 16:11:42	506] [0m Trial 56 finished with value: -2159.33056640625 and parameters: {'r_scaling': 2.2694979626527374	'unroll': 3	'update_epoch': 7	'discount': 0.9316746730507037	'lr': 0.00014415162247226313	'entropy': 0.0022083709813146605}. Best is trial 34 with value: -2182.529296875. [0m
[32m[I 2022-01-20 16:15:22	310] [0m Trial 57 finished with value: -732.42529296875 and parameters: {'r_scaling': 2.589379338849038	'unroll': 1	'update_epoch': 7	'discount': 0.9316482882896173	'lr': 0.0001470171252615937	'entropy': 0.0013309007490167606}. Best is trial 34 with value: -2182.529296875. [0m
[32m[I 2022-01-20 16:18:37	911] [0m Trial 58 finished with value: 108.86900329589844 and parameters: {'r_scaling': 8.741385332425692	'unroll': 4	'update_epoch': 7	'discount': 0.928781042969245	'lr': 0.00012707111498707718	'entropy': 0.0008879873328285623}. Best is trial 34 with value: -2182.529296875. [0m
[32m[I 2022-01-20 16:22:08	275] [0m Trial 59 finished with value: -344.27972412109375 and parameters: {'r_scaling': 4.471540829079771	'unroll': 2	'update_epoch': 8	'discount': 0.9231173651684151	'lr': 0.00011748480532101281	'entropy': 0.0016242289549469324}. Best is trial 34 with value: -2182.529296875. [0m
[32m[I 2022-01-20 16:25:19	223] [0m Trial 60 finished with value: 111.6385269165039 and parameters: {'r_scaling': 1.8679615530157772	'unroll': 5	'update_epoch': 6	'discount': 0.9024280989580794	'lr': 0.00014393241020810982	'entropy': 0.0004482241907336079}. Best is trial 34 with value: -2182.529296875. [0m
[32m[I 2022-01-20 16:28:53	729] [0m Trial 61 finished with value: -1597.9864501953125 and parameters: {'r_scaling': 0.3771924592651166	'unroll': 3	'update_epoch': 5	'discount': 0.9115818129287073	'lr': 0.00020825154716172853	'entropy': 0.002282968206374737}. Best is trial 34 with value: -2182.529296875. [0m
[32m[I 2022-01-20 16:32:26	502] [0m Trial 62 finished with value: -1022.17431640625 and parameters: {'r_scaling': 0.2710963215103341	'unroll': 3	'update_epoch': 5	'discount': 0.9119921516694531	'lr': 0.00026460149138182824	'entropy': 0.0021733812860844754}. Best is trial 34 with value: -2182.529296875. [0m
[32m[I 2022-01-20 16:35:57	265] [0m Trial 63 finished with value: -24.069494247436523 and parameters: {'r_scaling': 0.1731903523765598	'unroll': 2	'update_epoch': 3	'discount': 0.9150790967897818	'lr': 0.00020615493790757705	'entropy': 0.00028157524967686973}. Best is trial 34 with value: -2182.529296875. [0m
[32m[I 2022-01-20 16:39:13	719] [0m Trial 64 finished with value: 111.04093933105469 and parameters: {'r_scaling': 0.41530569184250754	'unroll': 4	'update_epoch': 4	'discount': 0.90903121063874	'lr': 0.0001756341191873276	'entropy': 0.007873458490018621}. Best is trial 34 with value: -2182.529296875. [0m
[32m[I 2022-01-20 16:42:17	289] [0m Trial 65 finished with value: -983.1600341796875 and parameters: {'r_scaling': 0.5849719944160684	'unroll': 1	'update_epoch': 5	'discount': 0.9403349139231283	'lr': 0.00014056902951536853	'entropy': 0.0036035742332526394}. Best is trial 34 with value: -2182.529296875. [0m
[32m[I 2022-01-20 16:45:49	313] [0m Trial 66 finished with value: -1357.975830078125 and parameters: {'r_scaling': 1.2731486199044801	'unroll': 3	'update_epoch': 9	'discount': 0.9004976104018989	'lr': 0.00022172509073392112	'entropy': 0.0011736739539310195}. Best is trial 34 with value: -2182.529296875. [0m
[32m[I 2022-01-20 16:49:02	595] [0m Trial 67 finished with value: 115.73536682128906 and parameters: {'r_scaling': 0.909249419825993	'unroll': 9	'update_epoch': 4	'discount': 0.9055712313697472	'lr': 0.0001986414770015679	'entropy': 0.001592759665642131}. Best is trial 34 with value: -2182.529296875. [0m
[32m[I 2022-01-20 16:52:34	176] [0m Trial 68 finished with value: 135.46890258789062 and parameters: {'r_scaling': 17.674222814165894	'unroll': 2	'update_epoch': 6	'discount': 0.9509730662040706	'lr': 0.0009259788919361262	'entropy': 0.0022813438906223297}. Best is trial 34 with value: -2182.529296875. [0m
[32m[I 2022-01-20 16:56:08	638] [0m Trial 69 finished with value: -582.3408203125 and parameters: {'r_scaling': 0.10778085471022412	'unroll': 3	'update_epoch': 10	'discount': 0.9163175162538082	'lr': 0.00040091558502762775	'entropy': 0.000816025136688771}. Best is trial 34 with value: -2182.529296875. [0m
[32m[I 2022-01-20 16:59:30	230] [0m Trial 70 finished with value: 103.93931579589844 and parameters: {'r_scaling': 2.974019934238339	'unroll': 6	'update_epoch': 7	'discount': 0.9123670104770193	'lr': 0.0010933601341035714	'entropy': 0.0005471750640870619}. Best is trial 34 with value: -2182.529296875. [0m
[32m[I 2022-01-20 17:03:04	257] [0m Trial 71 finished with value: -1236.93017578125 and parameters: {'r_scaling': 0.19187155842342957	'unroll': 3	'update_epoch': 13	'discount': 0.920316676865218	'lr': 0.00015255034945711607	'entropy': 0.0029998870455521217}. Best is trial 34 with value: -2182.529296875. [0m
[32m[I 2022-01-20 17:06:18	060] [0m Trial 72 finished with value: 111.87831115722656 and parameters: {'r_scaling': 0.2586538170480752	'unroll': 4	'update_epoch': 14	'discount': 0.9074672828070944	'lr': 0.0019104033603227675	'entropy': 0.002544981504345849}. Best is trial 34 with value: -2182.529296875. [0m
[32m[I 2022-01-20 17:09:52	868] [0m Trial 73 finished with value: -1612.881591796875 and parameters: {'r_scaling': 0.37667557038476146	'unroll': 3	'update_epoch': 12	'discount': 0.9205471201004639	'lr': 0.00016461955522575336	'entropy': 0.005419306029576841}. Best is trial 34 with value: -2182.529296875. [0m
[32m[I 2022-01-20 17:13:08	561] [0m Trial 74 finished with value: 117.96784973144531 and parameters: {'r_scaling': 0.37148199704633134	'unroll': 5	'update_epoch': 11	'discount': 0.9057998341593907	'lr': 0.00016967809183747538	'entropy': 0.00562619461993568}. Best is trial 34 with value: -2182.529296875. [0m
[32m[I 2022-01-20 17:16:47	807] [0m Trial 75 finished with value: -714.5180053710938 and parameters: {'r_scaling': 0.4986083614339873	'unroll': 2	'update_epoch': 13	'discount': 0.9101634137800398	'lr': 0.0001319865722458942	'entropy': 0.009936620356829884}. Best is trial 34 with value: -2182.529296875. [0m
[32m[I 2022-01-20 17:20:34	540] [0m Trial 76 finished with value: -928.0894775390625 and parameters: {'r_scaling': 0.7325920706715481	'unroll': 1	'update_epoch': 12	'discount': 0.9291425995304937	'lr': 0.00010919750850773407	'entropy': 0.00017170381476654294}. Best is trial 34 with value: -2182.529296875. [0m
[32m[I 2022-01-20 17:24:09	524] [0m Trial 77 finished with value: -1464.8681640625 and parameters: {'r_scaling': 0.1460786372573108	'unroll': 3	'update_epoch': 11	'discount': 0.937742016508124	'lr': 0.00024167299180502492	'entropy': 0.016106454886642314}. Best is trial 34 with value: -2182.529296875. [0m
[32m[I 2022-01-20 17:27:26	596] [0m Trial 78 finished with value: 112.00491333007812 and parameters: {'r_scaling': 0.05023507476847997	'unroll': 4	'update_epoch': 11	'discount': 0.9465489219900293	'lr': 0.00023609399119680835	'entropy': 0.017041507394954837}. Best is trial 34 with value: -2182.529296875. [0m
[32m[I 2022-01-20 17:30:56	807] [0m Trial 79 finished with value: -1120.840087890625 and parameters: {'r_scaling': 0.0669154527219905	'unroll': 3	'update_epoch': 12	'discount': 0.9343010083284415	'lr': 0.00019280095086341686	'entropy': 0.014835072612895076}. Best is trial 34 with value: -2182.529296875. [0m
[32m[I 2022-01-20 17:34:13	909] [0m Trial 80 finished with value: 105.93925476074219 and parameters: {'r_scaling': 0.1423394386544039	'unroll': 8	'update_epoch': 10	'discount': 0.936943762699248	'lr': 0.0003087591819795356	'entropy': 0.007230732932332428}. Best is trial 34 with value: -2182.529296875. [0m
[32m[I 2022-01-20 17:37:18	457] [0m Trial 81 finished with value: -2127.603515625 and parameters: {'r_scaling': 0.3111421264555532	'unroll': 3	'update_epoch': 12	'discount': 0.9025648671488111	'lr': 0.0002471780804317839	'entropy': 0.003754587809164492}. Best is trial 34 with value: -2182.529296875. [0m
[32m[I 2022-01-20 17:41:01	378] [0m Trial 82 finished with value: 136.690673828125 and parameters: {'r_scaling': 0.295395575662802	'unroll': 2	'update_epoch': 12	'discount': 0.9379168558626539	'lr': 0.0002503591035145779	'entropy': 0.0036334200242439073}. Best is trial 34 with value: -2182.529296875. [0m
[32m[I 2022-01-20 17:44:18	826] [0m Trial 83 finished with value: 108.80950927734375 and parameters: {'r_scaling': 0.15816460421537432	'unroll': 4	'update_epoch': 11	'discount': 0.9246150926100265	'lr': 0.0002836522452487961	'entropy': 0.004885067922447409}. Best is trial 34 with value: -2182.529296875. [0m
[32m[I 2022-01-20 17:47:53	053] [0m Trial 84 finished with value: 134.7595672607422 and parameters: {'r_scaling': 0.21442192330310864	'unroll': 2	'update_epoch': 12	'discount': 0.9030522428358753	'lr': 0.00021529967172295435	'entropy': 0.02007528987174564}. Best is trial 34 with value: -2182.529296875. [0m
[32m[I 2022-01-20 17:51:28	769] [0m Trial 85 finished with value: -1951.018310546875 and parameters: {'r_scaling': 0.32783690306095487	'unroll': 3	'update_epoch': 11	'discount': 0.9214249480954404	'lr': 0.00023846013543971905	'entropy': 0.004017912887929862}. Best is trial 34 with value: -2182.529296875. [0m
[32m[I 2022-01-20 17:55:12	806] [0m Trial 86 finished with value: 137.25433349609375 and parameters: {'r_scaling': 0.3709648675333111	'unroll': 1	'update_epoch': 13	'discount': 0.9218225510203057	'lr': 0.0006393693875968246	'entropy': 0.004047281625189092}. Best is trial 34 with value: -2182.529296875. [0m
[32m[I 2022-01-20 17:58:28	674] [0m Trial 87 finished with value: 111.9284896850586 and parameters: {'r_scaling': 0.1101913637513386	'unroll': 4	'update_epoch': 13	'discount': 0.9161830768574395	'lr': 0.000191116146244193	'entropy': 0.0064863594587938255}. Best is trial 34 with value: -2182.529296875. [0m
[32m[I 2022-01-20 18:01:22	210] [0m Trial 88 finished with value: 115.39974212646484 and parameters: {'r_scaling': 0.4521688856361633	'unroll': 5	'update_epoch': 12	'discount': 0.9060720248885422	'lr': 0.00017567240020431688	'entropy': 0.0018210735020065959}. Best is trial 34 with value: -2182.529296875. [0m
[32m[I 2022-01-20 18:04:52	145] [0m Trial 89 finished with value: -1503.254150390625 and parameters: {'r_scaling': 0.08142813421890543	'unroll': 3	'update_epoch': 14	'discount': 0.9130282654890695	'lr': 0.00027327692237534145	'entropy': 0.0025116850205602814}. Best is trial 34 with value: -2182.529296875. [0m
[32m[I 2022-01-20 18:07:57	369] [0m Trial 90 finished with value: 39.71051788330078 and parameters: {'r_scaling': 0.07901126184350593	'unroll': 2	'update_epoch': 14	'discount': 0.9183582274134384	'lr': 0.00031505627744908706	'entropy': 0.004946435524556863}. Best is trial 34 with value: -2182.529296875. [0m
[32m[I 2022-01-20 18:11:38	164] [0m Trial 91 finished with value: -1960.614990234375 and parameters: {'r_scaling': 0.28175560667277877	'unroll': 3	'update_epoch': 13	'discount': 0.9130272174625221	'lr': 0.00035457131780782056	'entropy': 0.002489313458032806}. Best is trial 34 with value: -2182.529296875. [0m
[32m[I 2022-01-20 18:15:15	340] [0m Trial 92 finished with value: -967.7520751953125 and parameters: {'r_scaling': 0.3155859133255587	'unroll': 3	'update_epoch': 13	'discount': 0.9142676386543145	'lr': 0.00037006691604799506	'entropy': 0.0025966781752642058}. Best is trial 34 with value: -2182.529296875. [0m
[32m[I 2022-01-20 18:18:33	873] [0m Trial 93 finished with value: 115.232421875 and parameters: {'r_scaling': 0.24417625074963925	'unroll': 4	'update_epoch': 14	'discount': 0.9129877923452955	'lr': 0.00026904192544657086	'entropy': 0.0033398121375137297}. Best is trial 34 with value: -2182.529296875. [0m
[32m[I 2022-01-20 18:22:11	919] [0m Trial 94 finished with value: -1429.1585693359375 and parameters: {'r_scaling': 0.08312709856494996	'unroll': 3	'update_epoch': 13	'discount': 0.9201953362222638	'lr': 0.00034414172948566774	'entropy': 0.002449232916999517}. Best is trial 34 with value: -2182.529296875. [0m
[32m[I 2022-01-20 18:25:47	361] [0m Trial 95 finished with value: 137.5039520263672 and parameters: {'r_scaling': 1.1107958305811236	'unroll': 2	'update_epoch': 12	'discount': 0.9175047002406658	'lr': 0.0002960172947412869	'entropy': 0.0011085306361254888}. Best is trial 34 with value: -2182.529296875. [0m
[32m[I 2022-01-20 18:29:24	972] [0m Trial 96 finished with value: -1062.263671875 and parameters: {'r_scaling': 0.36042348123317963	'unroll': 3	'update_epoch': 13	'discount': 0.9084841696228833	'lr': 0.00021082079920519407	'entropy': 0.001813364629285654}. Best is trial 34 with value: -2182.529296875. [0m
[32m[I 2022-01-20 18:32:42	602] [0m Trial 97 finished with value: 109.88188171386719 and parameters: {'r_scaling': 0.05940931616603869	'unroll': 4	'update_epoch': 12	'discount': 0.911441021922559	'lr': 0.00025507051159287975	'entropy': 0.0063451654814716}. Best is trial 34 with value: -2182.529296875. [0m
[32m[I 2022-01-20 18:36:14	024] [0m Trial 98 finished with value: 140.41436767578125 and parameters: {'r_scaling': 0.18682241267381364	'unroll': 2	'update_epoch': 14	'discount': 0.92526853698601	'lr': 0.00037660144612378923	'entropy': 0.0013432086931743365}. Best is trial 34 with value: -2182.529296875. [0m
[32m[I 2022-01-20 18:40:00	030] [0m Trial 99 finished with value: -968.8037719726562 and parameters: {'r_scaling': 0.5258412164070811	'unroll': 1	'update_epoch': 15	'discount': 0.9019254129508426	'lr': 0.00016594368892305935	'entropy': 0.010116553267546863}. Best is trial 34 with value: -2182.529296875. [0m
[32m[I 2022-01-20 18:43:36	718] [0m Trial 100 finished with value: -1235.508056640625 and parameters: {'r_scaling': 0.12103501587407049	'unroll': 3	'update_epoch': 10	'discount': 0.9151498339914813	'lr': 0.00045753996206723076	'entropy': 0.0029388620855972615}. Best is trial 34 with value: -2182.529296875. [0m
[32m[I 2022-01-20 18:47:18	123] [0m Trial 101 finished with value: -1310.68505859375 and parameters: {'r_scaling': 0.26409404343237075	'unroll': 3	'update_epoch': 4	'discount': 0.9056227447077296	'lr': 0.00022344071637214676	'entropy': 0.0034846519986060595}. Best is trial 34 with value: -2182.529296875. [0m
[32m[I 2022-01-20 18:50:37	249] [0m Trial 102 finished with value: 114.98049926757812 and parameters: {'r_scaling': 0.09872236884855982	'unroll': 4	'update_epoch': 8	'discount': 0.9089609773800872	'lr': 0.00023802288008912636	'entropy': 0.003934885452312681}. Best is trial 34 with value: -2182.529296875. [0m
[32m[I 2022-01-20 18:53:34	900] [0m Trial 103 finished with value: 144.1501922607422 and parameters: {'r_scaling': 0.42759545581042185	'unroll': 2	'update_epoch': 12	'discount': 0.9039366528375115	'lr': 0.0002727343772006901	'entropy': 0.004608630075436716}. Best is trial 34 with value: -2182.529296875. [0m
[32m[I 2022-01-20 18:57:11	634] [0m Trial 104 finished with value: -1835.25537109375 and parameters: {'r_scaling': 0.3087182193767523	'unroll': 3	'update_epoch': 13	'discount': 0.9125553011538733	'lr': 0.00018095492455105078	'entropy': 0.002037551111786102}. Best is trial 34 with value: -2182.529296875. [0m
[32m[I 2022-01-20 19:00:44	323] [0m Trial 105 finished with value: -1699.0865478515625 and parameters: {'r_scaling': 0.30696509631058866	'unroll': 3	'update_epoch': 13	'discount': 0.9127464826904774	'lr': 0.0001493045928387928	'entropy': 0.001361324767175023}. Best is trial 34 with value: -2182.529296875. [0m
[32m[I 2022-01-20 19:03:59	897] [0m Trial 106 finished with value: 112.4951400756836 and parameters: {'r_scaling': 0.6495649897565863	'unroll': 5	'update_epoch': 13	'discount': 0.9216622632930026	'lr': 0.00011833808950564894	'entropy': 0.0013751940138464129}. Best is trial 34 with value: -2182.529296875. [0m
[32m[I 2022-01-20 19:07:13	106] [0m Trial 107 finished with value: 113.63494110107422 and parameters: {'r_scaling': 0.28435358604563665	'unroll': 4	'update_epoch': 11	'discount': 0.928479714725821	'lr': 0.0001397854087041639	'entropy': 0.002144426715084845}. Best is trial 34 with value: -2182.529296875. [0m
[32m[I 2022-01-20 19:10:11	541] [0m Trial 108 finished with value: -1254.0537109375 and parameters: {'r_scaling': 7.260607504467559	'unroll': 3	'update_epoch': 13	'discount': 0.9116507265099756	'lr': 0.0001858527747974472	'entropy': 0.0019741678818796394}. Best is trial 34 with value: -2182.529296875. [0m
[32m[I 2022-01-20 19:13:58	750] [0m Trial 109 finished with value: 148.96029663085938 and parameters: {'r_scaling': 0.20734687740162128	'unroll': 2	'update_epoch': 9	'discount': 0.916927710570964	'lr': 0.00014888713474101888	'entropy': 0.001038734200283757}. Best is trial 34 with value: -2182.529296875. [0m
[32m[I 2022-01-20 19:17:40	583] [0m Trial 110 finished with value: -441.8536682128906 and parameters: {'r_scaling': 1.5620963959967482	'unroll': 1	'update_epoch': 12	'discount': 0.9070776705700693	'lr': 0.00015363752847478805	'entropy': 0.0007908601216461097}. Best is trial 34 with value: -2182.529296875. [0m
[32m[I 2022-01-20 19:21:20	149] [0m Trial 111 finished with value: -1493.1131591796875 and parameters: {'r_scaling': 0.3257369348206822	'unroll': 3	'update_epoch': 14	'discount': 0.9136006819880719	'lr': 0.00019904391374242584	'entropy': 0.001539699826631711}. Best is trial 34 with value: -2182.529296875. [0m
[32m[I 2022-01-20 19:24:58	611] [0m Trial 112 finished with value: -1250.1767578125 and parameters: {'r_scaling': 0.802433516593152	'unroll': 3	'update_epoch': 14	'discount': 0.9133462517245717	'lr': 0.00017130388120771428	'entropy': 0.0024194183964629055}. Best is trial 34 with value: -2182.529296875. [0m
[32m[I 2022-01-20 19:28:34	112] [0m Trial 113 finished with value: -1745.2567138671875 and parameters: {'r_scaling': 0.44044140923845965	'unroll': 3	'update_epoch': 13	'discount': 0.9104916770549888	'lr': 0.00018117471482533633	'entropy': 0.0017538629743553762}. Best is trial 34 with value: -2182.529296875. [0m
[32m[I 2022-01-20 19:31:25	096] [0m Trial 114 finished with value: 116.69206237792969 and parameters: {'r_scaling': 0.457525445502438	'unroll': 4	'update_epoch': 13	'discount': 0.9016282163367118	'lr': 0.0001609065074061278	'entropy': 0.0030409960981647595}. Best is trial 34 with value: -2182.529296875. [0m
[32m[I 2022-01-20 19:34:55	640] [0m Trial 115 finished with value: 143.05006408691406 and parameters: {'r_scaling': 0.5231795095651655	'unroll': 2	'update_epoch': 12	'discount': 0.9099190529737452	'lr': 0.0016784070719321636	'entropy': 0.001726652935359333}. Best is trial 34 with value: -2182.529296875. [0m
[32m[I 2022-01-20 19:38:31	343] [0m Trial 116 finished with value: -2054.712890625 and parameters: {'r_scaling': 48.303514882246496	'unroll': 3	'update_epoch': 13	'discount': 0.9637786915101314	'lr': 0.00018144601228658384	'entropy': 0.0013408893868289437}. Best is trial 34 with value: -2182.529296875. [0m
[32m[I 2022-01-20 19:41:33	429] [0m Trial 117 finished with value: 112.95970153808594 and parameters: {'r_scaling': 50.927057549939406	'unroll': 4	'update_epoch': 13	'discount': 0.9190558929029142	'lr': 0.00013222706190003564	'entropy': 0.0013403687345821438}. Best is trial 34 with value: -2182.529296875. [0m
[32m[I 2022-01-20 19:45:07	278] [0m Trial 118 finished with value: -448.1374206542969 and parameters: {'r_scaling': 103.8969089290876	'unroll': 2	'update_epoch': 13	'discount': 0.9858139003393492	'lr': 0.00017771859659056015	'entropy': 0.0009473318380815996}. Best is trial 34 with value: -2182.529296875. [0m
[32m[I 2022-01-20 19:48:44	572] [0m Trial 119 finished with value: -1819.1748046875 and parameters: {'r_scaling': 17.976252047274652	'unroll': 3	'update_epoch': 12	'discount': 0.9691196395787494	'lr': 0.0001451272535442578	'entropy': 0.005414799921586992}. Best is trial 34 with value: -2182.529296875. [0m
[32m[I 2022-01-20 19:52:22	419] [0m Trial 120 finished with value: -1585.069091796875 and parameters: {'r_scaling': 14.903757458629121	'unroll': 3	'update_epoch': 11	'discount': 0.9655857749303394	'lr': 0.0001448718006885866	'entropy': 0.00761988221730875}. Best is trial 34 with value: -2182.529296875. [0m
[32m[I 2022-01-20 19:55:56	601] [0m Trial 121 finished with value: -1842.462890625 and parameters: {'r_scaling': 14.325934602255568	'unroll': 3	'update_epoch': 12	'discount': 0.9515468129519812	'lr': 0.00016098887901147042	'entropy': 0.0012011062497719607}. Best is trial 34 with value: -2182.529296875. [0m
[32m[I 2022-01-20 19:59:34	386] [0m Trial 122 finished with value: -1950.780029296875 and parameters: {'r_scaling': 26.950616265800342	'unroll': 3	'update_epoch': 12	'discount': 0.970046188373584	'lr': 0.00015424203865968742	'entropy': 0.0012262659351015622}. Best is trial 34 with value: -2182.529296875. [0m
[32m[I 2022-01-20 20:03:07	799] [0m Trial 123 finished with value: -2286.29296875 and parameters: {'r_scaling': 25.186341847570468	'unroll': 3	'update_epoch': 11	'discount': 0.9735281336097884	'lr': 0.00012163731036580742	'entropy': 0.0009923967007960748}. Best is trial 123 with value: -2286.29296875. [0m
[32m[I 2022-01-20 20:06:24	056] [0m Trial 124 finished with value: 113.04804229736328 and parameters: {'r_scaling': 24.986715422721325	'unroll': 4	'update_epoch': 11	'discount': 0.9711558005410825	'lr': 0.00015687615560264301	'entropy': 0.000956522700220007}. Best is trial 123 with value: -2286.29296875. [0m
[32m[I 2022-01-20 20:09:53	680] [0m Trial 125 finished with value: -2036.15087890625 and parameters: {'r_scaling': 38.7652960055413	'unroll': 3	'update_epoch': 12	'discount': 0.9621256467068169	'lr': 0.00014067709053919853	'entropy': 0.0012201529854247379}. Best is trial 123 with value: -2286.29296875. [0m
[32m[I 2022-01-20 20:13:37	596] [0m Trial 126 finished with value: -2281.92529296875 and parameters: {'r_scaling': 32.61255694734298	'unroll': 3	'update_epoch': 12	'discount': 0.9632903197342781	'lr': 0.00011951517132841239	'entropy': 0.0011799026300414411}. Best is trial 123 with value: -2286.29296875. [0m
[32m[I 2022-01-20 20:16:54	005] [0m Trial 127 finished with value: 108.98773193359375 and parameters: {'r_scaling': 30.392298445055612	'unroll': 4	'update_epoch': 11	'discount': 0.9633630334911736	'lr': 0.0001115576473986678	'entropy': 0.0006448084344130052}. Best is trial 123 with value: -2286.29296875. [0m
[32m[I 2022-01-20 20:20:25	552] [0m Trial 128 finished with value: -262.04583740234375 and parameters: {'r_scaling': 37.4357035871697	'unroll': 2	'update_epoch': 12	'discount': 0.9683026639959982	'lr': 0.00013598905754187138	'entropy': 0.001165800205470647}. Best is trial 123 with value: -2286.29296875. [0m
[32m[I 2022-01-20 20:23:23	688] [0m Trial 129 finished with value: -2335.34619140625 and parameters: {'r_scaling': 62.420972089811094	'unroll': 3	'update_epoch': 11	'discount': 0.9606880709900576	'lr': 0.0001204546386138517	'entropy': 0.001032364261506496}. Best is trial 129 with value: -2335.34619140625. [0m
[32m[I 2022-01-20 20:27:01	997] [0m Trial 130 finished with value: -85.6490707397461 and parameters: {'r_scaling': 42.68573980480369	'unroll': 2	'update_epoch': 10	'discount': 0.9605242085895284	'lr': 0.0001214089457445553	'entropy': 0.001038660423553057}. Best is trial 129 with value: -2335.34619140625. [0m
[32m[I 2022-01-20 20:30:38	632] [0m Trial 131 finished with value: -2170.3505859375 and parameters: {'r_scaling': 59.4842101345696	'unroll': 3	'update_epoch': 11	'discount': 0.9777249545959963	'lr': 0.00012766005402906102	'entropy': 0.0008752587887676501}. Best is trial 129 with value: -2335.34619140625. [0m
[32m[I 2022-01-20 20:34:10	023] [0m Trial 132 finished with value: -1989.441650390625 and parameters: {'r_scaling': 65.57297253248612	'unroll': 3	'update_epoch': 11	'discount': 0.9820147768149362	'lr': 0.00010417959286913546	'entropy': 0.0008541309738984373}. Best is trial 129 with value: -2335.34619140625. [0m
[32m[I 2022-01-20 20:37:47	784] [0m Trial 133 finished with value: -2016.3460693359375 and parameters: {'r_scaling': 79.33658270010562	'unroll': 3	'update_epoch': 11	'discount': 0.9813440023894281	'lr': 0.00010500426654159451	'entropy': 0.0008743987267418979}. Best is trial 129 with value: -2335.34619140625. [0m
[32m[I 2022-01-20 20:40:39	448] [0m Trial 134 finished with value: 111.18343353271484 and parameters: {'r_scaling': 74.36984494540617	'unroll': 4	'update_epoch': 10	'discount': 0.976680574129777	'lr': 0.00010474583326484943	'entropy': 0.0005500596280636742}. Best is trial 129 with value: -2335.34619140625. [0m
[32m[I 2022-01-20 20:43:37	778] [0m Trial 135 finished with value: -1782.6640625 and parameters: {'r_scaling': 69.50884609492637	'unroll': 3	'update_epoch': 11	'discount': 0.9803949640020232	'lr': 0.00010284937436996267	'entropy': 0.0008307679488977726}. Best is trial 129 with value: -2335.34619140625. [0m
[32m[I 2022-01-20 20:47:25	943] [0m Trial 136 finished with value: -1816.1064453125 and parameters: {'r_scaling': 104.75177251168256	'unroll': 3	'update_epoch': 11	'discount': 0.9787222719632263	'lr': 0.00011557211847975186	'entropy': 0.000688364685302205}. Best is trial 129 with value: -2335.34619140625. [0m
[32m[I 2022-01-20 20:50:16	180] [0m Trial 137 finished with value: 110.81840515136719 and parameters: {'r_scaling': 58.90847296702509	'unroll': 10	'update_epoch': 11	'discount': 0.9815018658564121	'lr': 0.00012769342458416653	'entropy': 0.0008981340407802198}. Best is trial 129 with value: -2335.34619140625. [0m
[32m[I 2022-01-20 20:53:47	163] [0m Trial 138 finished with value: -1276.41259765625 and parameters: {'r_scaling': 82.57503780711808	'unroll': 2	'update_epoch': 10	'discount': 0.9890912563438737	'lr': 0.00011131372765905692	'entropy': 0.0007421820209435133}. Best is trial 129 with value: -2335.34619140625. [0m
[32m[I 2022-01-20 20:56:33	424] [0m Trial 139 finished with value: 110.86647033691406 and parameters: {'r_scaling': 51.068013428631055	'unroll': 4	'update_epoch': 11	'discount': 0.972152812154166	'lr': 0.00011844468956625239	'entropy': 0.001012043124974816}. Best is trial 129 with value: -2335.34619140625. [0m
[32m[I 2022-01-20 20:59:49	240] [0m Trial 140 finished with value: 104.9764404296875 and parameters: {'r_scaling': 188.0831266416037	'unroll': 4	'update_epoch': 10	'discount': 0.9597027800362051	'lr': 0.00010735969429989611	'entropy': 0.00145612215400201}. Best is trial 129 with value: -2335.34619140625. [0m
[32m[I 2022-01-20 21:03:16	917] [0m Trial 141 finished with value: -2375.11279296875 and parameters: {'r_scaling': 24.828079737649183	'unroll': 3	'update_epoch': 12	'discount': 0.9560709645221273	'lr': 0.00012684433857343714	'entropy': 0.0011551425746018208}. Best is trial 141 with value: -2375.11279296875. [0m
[32m[I 2022-01-20 21:06:35	145] [0m Trial 142 finished with value: -2339.017578125 and parameters: {'r_scaling': 28.104755641437244	'unroll': 3	'update_epoch': 12	'discount': 0.9629843185879863	'lr': 0.00012489436614729436	'entropy': 0.001199289478460004}. Best is trial 141 with value: -2375.11279296875. [0m
[32m[I 2022-01-20 21:09:57	842] [0m Trial 143 finished with value: -1969.84228515625 and parameters: {'r_scaling': 42.276588760413624	'unroll': 3	'update_epoch': 11	'discount': 0.9550384909750075	'lr': 0.00012183988566042863	'entropy': 0.0008245517920520779}. Best is trial 141 with value: -2375.11279296875. [0m
[32m[I 2022-01-20 21:13:02	016] [0m Trial 144 finished with value: -50.16534423828125 and parameters: {'r_scaling': 36.431095491405436	'unroll': 2	'update_epoch': 12	'discount': 0.9567019714219573	'lr': 0.00012959567146367127	'entropy': 0.0008607124932708571}. Best is trial 141 with value: -2375.11279296875. [0m
[32m[I 2022-01-20 21:16:38	262] [0m Trial 145 finished with value: -2058.923583984375 and parameters: {'r_scaling': 50.71354669739667	'unroll': 3	'update_epoch': 11	'discount': 0.9632759693334596	'lr': 0.00010174896988788627	'entropy': 0.0004797358814848509}. Best is trial 141 with value: -2375.11279296875. [0m
[32m[I 2022-01-20 21:20:30	742] [0m Trial 146 finished with value: -2206.822265625 and parameters: {'r_scaling': 46.05967029279091	'unroll': 3	'update_epoch': 11	'discount': 0.9635534748661406	'lr': 0.00010364490374561725	'entropy': 0.0004764338384233673}. Best is trial 141 with value: -2375.11279296875. [0m
[32m[I 2022-01-20 21:24:14	146] [0m Trial 147 finished with value: -1603.315185546875 and parameters: {'r_scaling': 58.48883030151918	'unroll': 2	'update_epoch': 11	'discount': 0.9628491507630914	'lr': 0.0001026064952779336	'entropy': 0.0004770053516219822}. Best is trial 141 with value: -2375.11279296875. [0m
[32m[I 2022-01-20 21:27:47	945] [0m Trial 148 finished with value: -2131.894775390625 and parameters: {'r_scaling': 30.21986671928443	'unroll': 3	'update_epoch': 12	'discount': 0.983130323944054	'lr': 0.00011296180307016984	'entropy': 0.00034209029960384854}. Best is trial 141 with value: -2375.11279296875. [0m
[32m[I 2022-01-20 21:31:46	302] [0m Trial 149 finished with value: 112.11175537109375 and parameters: {'r_scaling': 23.0650149133212	'unroll': 4	'update_epoch': 12	'discount': 0.9615897077851466	'lr': 0.00011315438809542913	'entropy': 0.0005058669623470935}. Best is trial 141 with value: -2375.11279296875. [0m
[32m[I 2022-01-20 21:35:24	364] [0m Trial 150 finished with value: -412.9964599609375 and parameters: {'r_scaling': 31.698805918231763	'unroll': 2	'update_epoch': 12	'discount': 0.9660593827580691	'lr': 0.00011868455873835539	'entropy': 0.0003282310176090883}. Best is trial 141 with value: -2375.11279296875. [0m
[32m[I 2022-01-20 21:38:58	256] [0m Trial 151 finished with value: -2186.545654296875 and parameters: {'r_scaling': 51.97641530189938	'unroll': 3	'update_epoch': 11	'discount': 0.9835625006580674	'lr': 0.00011013292972943204	'entropy': 0.00023955358830922592}. Best is trial 141 with value: -2375.11279296875. [0m
[32m[I 2022-01-20 21:42:39	853] [0m Trial 152 finished with value: -2024.68701171875 and parameters: {'r_scaling': 50.60523966099689	'unroll': 3	'update_epoch': 11	'discount': 0.9589681844768765	'lr': 0.00012472906488951563	'entropy': 0.0003426495657858181}. Best is trial 141 with value: -2375.11279296875. [0m
[32m[I 2022-01-20 21:46:22	000] [0m Trial 153 finished with value: -2154.018310546875 and parameters: {'r_scaling': 49.42446356737953	'unroll': 3	'update_epoch': 10	'discount': 0.9578766056252747	'lr': 0.00012467801336820907	'entropy': 0.000364916006954431}. Best is trial 141 with value: -2375.11279296875. [0m
[32m[I 2022-01-20 21:49:58	881] [0m Trial 154 finished with value: -2305.476318359375 and parameters: {'r_scaling': 33.3693763321018	'unroll': 3	'update_epoch': 10	'discount': 0.9574485785239205	'lr': 0.0001353918965470558	'entropy': 0.00021358976728882525}. Best is trial 141 with value: -2375.11279296875. [0m
[32m[I 2022-01-20 21:53:48	766] [0m Trial 155 finished with value: 110.8857421875 and parameters: {'r_scaling': 21.273402717810246	'unroll': 4	'update_epoch': 10	'discount': 0.9532313498606035	'lr': 0.0001344280687355906	'entropy': 0.0001736861246430833}. Best is trial 141 with value: -2375.11279296875. [0m
[32m[I 2022-01-20 21:57:41	039] [0m Trial 156 finished with value: -1803.61181640625 and parameters: {'r_scaling': 32.6473535959411	'unroll': 3	'update_epoch': 10	'discount': 0.9937690876268678	'lr': 0.00011205311985485368	'entropy': 0.00022552034975538356}. Best is trial 141 with value: -2375.11279296875. [0m
[32m[I 2022-01-20 22:01:26	072] [0m Trial 157 finished with value: -2326.49169921875 and parameters: {'r_scaling': 45.25815967361255	'unroll': 3	'update_epoch': 9	'discount': 0.9573301753523977	'lr': 0.00012469205357020288	'entropy': 0.00023052458947891543}. Best is trial 141 with value: -2375.11279296875. [0m
[32m[I 2022-01-20 22:05:04	498] [0m Trial 158 finished with value: -455.12762451171875 and parameters: {'r_scaling': 28.983808144843852	'unroll': 2	'update_epoch': 10	'discount': 0.9583580334959215	'lr': 0.00012530068951914183	'entropy': 0.0001399040903570855}. Best is trial 141 with value: -2375.11279296875. [0m
[32m[I 2022-01-20 22:08:51	339] [0m Trial 159 finished with value: 116.36760711669922 and parameters: {'r_scaling': 91.76188206143448	'unroll': 4	'update_epoch': 9	'discount': 0.9838078416542634	'lr': 0.00010012267641875867	'entropy': 0.00022668824980369328}. Best is trial 141 with value: -2375.11279296875. [0m
[32m[I 2022-01-20 22:12:33	276] [0m Trial 160 finished with value: -2039.4241943359375 and parameters: {'r_scaling': 44.29533656123302	'unroll': 3	'update_epoch': 10	'discount': 0.9742919483114757	'lr': 0.00011623382618282845	'entropy': 0.0003824078154855842}. Best is trial 141 with value: -2375.11279296875. [0m
[32m[I 2022-01-20 22:16:09	578] [0m Trial 161 finished with value: -2127.78076171875 and parameters: {'r_scaling': 51.93349949382472	'unroll': 3	'update_epoch': 9	'discount': 0.9562205495874806	'lr': 0.00013588117638061646	'entropy': 0.00021689565535344218}. Best is trial 141 with value: -2375.11279296875. [0m
[32m[I 2022-01-20 22:19:48	526] [0m Trial 162 finished with value: -2005.350830078125 and parameters: {'r_scaling': 59.525161423044494	'unroll': 3	'update_epoch': 8	'discount': 0.9567315855088037	'lr': 0.00013042327714629634	'entropy': 0.0002362715707701959}. Best is trial 141 with value: -2375.11279296875. [0m
[32m[I 2022-01-20 22:23:28	463] [0m Trial 163 finished with value: -1999.24951171875 and parameters: {'r_scaling': 35.791391417932374	'unroll': 3	'update_epoch': 9	'discount': 0.9472274665778787	'lr': 0.00013668260066294574	'entropy': 0.00026676741129054123}. Best is trial 141 with value: -2375.11279296875. [0m
[32m[I 2022-01-20 22:27:11	380] [0m Trial 164 finished with value: -365.2135925292969 and parameters: {'r_scaling': 20.82798971502446	'unroll': 2	'update_epoch': 9	'discount': 0.9532344810384107	'lr': 0.00012095035208152244	'entropy': 0.00019540443989226385}. Best is trial 141 with value: -2375.11279296875. [0m
[32m[I 2022-01-20 22:30:57	217] [0m Trial 165 finished with value: -1888.31591796875 and parameters: {'r_scaling': 25.76149182663046	'unroll': 3	'update_epoch': 8	'discount': 0.9880334587338451	'lr': 0.00010893370619847597	'entropy': 0.0004063402142537125}. Best is trial 141 with value: -2375.11279296875. [0m
[32m[I 2022-01-20 22:34:43	691] [0m Trial 166 finished with value: 108.52114868164062 and parameters: {'r_scaling': 55.57115397994681	'unroll': 4	'update_epoch': 9	'discount': 0.9674539555961651	'lr': 0.00011403325234373572	'entropy': 0.0002930746570125804}. Best is trial 141 with value: -2375.11279296875. [0m
[32m[I 2022-01-20 22:38:40	112] [0m Trial 167 finished with value: -1520.4107666015625 and parameters: {'r_scaling': 14.432388471304428	'unroll': 3	'update_epoch': 11	'discount': 0.9648398241665442	'lr': 0.0001253288025931078	'entropy': 0.0003495147046944801}. Best is trial 141 with value: -2375.11279296875. [0m
[32m[I 2022-01-20 22:41:39	688] [0m Trial 168 finished with value: -1835.59423828125 and parameters: {'r_scaling': 44.62287188721905	'unroll': 3	'update_epoch': 10	'discount': 0.9492973492758802	'lr': 0.00014236671161706803	'entropy': 0.00020751845139190106}. Best is trial 141 with value: -2375.11279296875. [0m
[32m[I 2022-01-20 22:45:22	184] [0m Trial 169 finished with value: 109.88572692871094 and parameters: {'r_scaling': 35.51189449836319	'unroll': 4	'update_epoch': 11	'discount': 0.9572691814287363	'lr': 0.00013455483330229194	'entropy': 0.00011103448532129102}. Best is trial 141 with value: -2375.11279296875. [0m
[32m[I 2022-01-20 22:49:02	112] [0m Trial 170 finished with value: -1938.7255859375 and parameters: {'r_scaling': 30.865953601963664	'unroll': 3	'update_epoch': 12	'discount': 0.9610292000361105	'lr': 0.00011865762035573806	'entropy': 0.0001610977772784626}. Best is trial 141 with value: -2375.11279296875. [0m
[32m[I 2022-01-20 22:52:00	301] [0m Trial 171 finished with value: -2681.271240234375 and parameters: {'r_scaling': 49.01886302557378	'unroll': 3	'update_epoch': 11	'discount': 0.9642871435379441	'lr': 0.0001326986282026957	'entropy': 0.000254410902506494}. Best is trial 171 with value: -2681.271240234375. [0m
[32m[I 2022-01-20 22:55:42	154] [0m Trial 172 finished with value: -2172.28564453125 and parameters: {'r_scaling': 67.04330012216674	'unroll': 3	'update_epoch': 11	'discount': 0.9550905986862234	'lr': 0.00012894809806752568	'entropy': 0.00026855975437809436}. Best is trial 171 with value: -2681.271240234375. [0m
[32m[I 2022-01-20 22:59:23	156] [0m Trial 173 finished with value: -151.02301025390625 and parameters: {'r_scaling': 62.52512435119651	'unroll': 2	'update_epoch': 12	'discount': 0.9537959990993173	'lr': 0.00013093073891408627	'entropy': 0.00024725344554128514}. Best is trial 171 with value: -2681.271240234375. [0m
[32m[I 2022-01-20 23:03:05	667] [0m Trial 174 finished with value: -2405.6064453125 and parameters: {'r_scaling': 103.58000457204628	'unroll': 3	'update_epoch': 11	'discount': 0.9558105960916707	'lr': 0.00013881250289568144	'entropy': 0.0003013371569965055}. Best is trial 171 with value: -2681.271240234375. [0m
[32m[I 2022-01-20 23:06:52	551] [0m Trial 175 finished with value: -1964.7132568359375 and parameters: {'r_scaling': 41.53917068599031	'unroll': 3	'update_epoch': 10	'discount': 0.9558540408944171	'lr': 0.00013917292982479698	'entropy': 0.00031435618880773514}. Best is trial 171 with value: -2681.271240234375. [0m
[32m[I 2022-01-20 23:10:35	685] [0m Trial 176 finished with value: -1915.79052734375 and parameters: {'r_scaling': 121.05892427223537	'unroll': 3	'update_epoch': 11	'discount': 0.9513543704431275	'lr': 0.00012633600046435726	'entropy': 0.0002824090099682311}. Best is trial 171 with value: -2681.271240234375. [0m
[32m[I 2022-01-20 23:14:28	976] [0m Trial 177 finished with value: 117.466064453125 and parameters: {'r_scaling': 71.63581865771727	'unroll': 7	'update_epoch': 11	'discount': 0.9773315233086475	'lr': 0.00014700580323495646	'entropy': 0.00014714802693096703}. Best is trial 171 with value: -2681.271240234375. [0m
[32m[I 2022-01-20 23:18:38	343] [0m Trial 178 finished with value: -2127.64990234375 and parameters: {'r_scaling': 85.44809266935242	'unroll': 3	'update_epoch': 10	'discount': 0.9583581114587366	'lr': 0.00011101479531403196	'entropy': 0.00020432357724839057}. Best is trial 171 with value: -2681.271240234375. [0m
[32m[I 2022-01-20 23:22:29	072] [0m Trial 179 finished with value: 118.45359802246094 and parameters: {'r_scaling': 150.98379492906224	'unroll': 4	'update_epoch': 7	'discount': 0.9601408387448848	'lr': 0.00012235487333319323	'entropy': 0.00019173312851996637}. Best is trial 171 with value: -2681.271240234375. [0m
[32m[I 2022-01-20 23:26:16	242] [0m Trial 180 finished with value: -1582.619384765625 and parameters: {'r_scaling': 105.7562437241846	'unroll': 2	'update_epoch': 9	'discount': 0.9551951009311682	'lr': 0.000135983662797535	'entropy': 0.00025051250159037534}. Best is trial 171 with value: -2681.271240234375. [0m
[32m[I 2022-01-20 23:30:24	129] [0m Trial 181 finished with value: -1986.6182861328125 and parameters: {'r_scaling': 81.85100517786806	'unroll': 3	'update_epoch': 10	'discount': 0.9584950992483138	'lr': 0.0001105477591337836	'entropy': 0.00038307251108524924}. Best is trial 171 with value: -2681.271240234375. [0m
[32m[I 2022-01-20 23:34:27	064] [0m Trial 182 finished with value: -1607.19287109375 and parameters: {'r_scaling': 129.3476167944553	'unroll': 3	'update_epoch': 10	'discount': 0.983994356959917	'lr': 0.00011616003350064984	'entropy': 0.00021802525913829126}. Best is trial 171 with value: -2681.271240234375. [0m
[32m[I 2022-01-20 23:38:22	201] [0m Trial 183 finished with value: -2061.0634765625 and parameters: {'r_scaling': 87.20559076721793	'unroll': 3	'update_epoch': 11	'discount': 0.9576533933633298	'lr': 0.00012860263230035578	'entropy': 0.0002733899568700519}. Best is trial 171 with value: -2681.271240234375. [0m
[32m[I 2022-01-20 23:42:05	124] [0m Trial 184 finished with value: -2056.020263671875 and parameters: {'r_scaling': 62.259388852942585	'unroll': 3	'update_epoch': 10	'discount': 0.9614052962475432	'lr': 0.0001191704020039623	'entropy': 0.00018410503321031294}. Best is trial 171 with value: -2681.271240234375. [0m
[32m[I 2022-01-20 23:45:53	979] [0m Trial 185 finished with value: -1961.6654052734375 and parameters: {'r_scaling': 46.80663705017534	'unroll': 3	'update_epoch': 11	'discount': 0.9595466789545146	'lr': 0.00010869065537891125	'entropy': 0.00012917247929499637}. Best is trial 171 with value: -2681.271240234375. [0m
[32m[I 2022-01-20 23:48:53	404] [0m Trial 186 finished with value: -430.86407470703125 and parameters: {'r_scaling': 26.568187405201932	'unroll': 2	'update_epoch': 11	'discount': 0.952662738968542	'lr': 0.00013127905630359635	'entropy': 0.00030291088539099716}. Best is trial 171 with value: -2681.271240234375. [0m
[32m[I 2022-01-20 23:52:30	450] [0m Trial 187 finished with value: 104.28118896484375 and parameters: {'r_scaling': 38.24967044342429	'unroll': 4	'update_epoch': 12	'discount': 0.9440497727574206	'lr': 0.00014162107805317233	'entropy': 0.00036871117231622366}. Best is trial 171 with value: -2681.271240234375. [0m
[32m[I 2022-01-20 23:55:28	343] [0m Trial 188 finished with value: -1989.276611328125 and parameters: {'r_scaling': 72.70284295259941	'unroll': 3	'update_epoch': 10	'discount': 0.9664195895940494	'lr': 0.0001140298785578711	'entropy': 0.0001963988502934152}. Best is trial 171 with value: -2681.271240234375. [0m
[32m[I 2022-01-20 23:59:22	587] [0m Trial 189 finished with value: -1912.126220703125 and parameters: {'r_scaling': 55.05599931187513	'unroll': 3	'update_epoch': 7	'discount': 0.9562869700084604	'lr': 0.00012381069929807653	'entropy': 0.00025336616091628744}. Best is trial 171 with value: -2681.271240234375. [0m
[32m[I 2022-01-21 00:03:01	723] [0m Trial 190 finished with value: -383.9847412109375 and parameters: {'r_scaling': 32.072725552735974	'unroll': 2	'update_epoch': 11	'discount': 0.9722765219345607	'lr': 0.00015003271296081536	'entropy': 0.0001539230373092622}. Best is trial 171 with value: -2681.271240234375. [0m
[32m[I 2022-01-21 00:06:46	022] [0m Trial 191 finished with value: -2249.75927734375 and parameters: {'r_scaling': 45.12512290817152	'unroll': 3	'update_epoch': 12	'discount': 0.9640753592337753	'lr': 0.00010888433217344418	'entropy': 0.00032669395782156764}. Best is trial 171 with value: -2681.271240234375. [0m
[32m[I 2022-01-21 00:10:43	164] [0m Trial 192 finished with value: -1934.401611328125 and parameters: {'r_scaling': 49.83394340601738	'unroll': 3	'update_epoch': 12	'discount': 0.9646104851223335	'lr': 0.0001099642986043292	'entropy': 0.00030276240188320915}. Best is trial 171 with value: -2681.271240234375. [0m
[32m[I 2022-01-21 00:14:45	280] [0m Trial 193 finished with value: -2231.102783203125 and parameters: {'r_scaling': 41.27784147620458	'unroll': 3	'update_epoch': 9	'discount': 0.9618720066589483	'lr': 0.00012086770621489264	'entropy': 0.0004291999348285811}. Best is trial 171 with value: -2681.271240234375. [0m
[32m[I 2022-01-21 00:17:43	278] [0m Trial 194 finished with value: -1819.3880615234375 and parameters: {'r_scaling': 37.715450595423796	'unroll': 3	'update_epoch': 9	'discount': 0.962476776097716	'lr': 0.0001274914823438595	'entropy': 0.0004201840781788651}. Best is trial 171 with value: -2681.271240234375. [0m
[32m[I 2022-01-21 00:21:42	792] [0m Trial 195 finished with value: 112.74674987792969 and parameters: {'r_scaling': 44.8474440347497	'unroll': 4	'update_epoch': 8	'discount': 0.954822106181523	'lr': 0.00011826802689446491	'entropy': 0.0003523368053988588}. Best is trial 171 with value: -2681.271240234375. [0m
[32m[I 2022-01-21 00:25:45	756] [0m Trial 196 finished with value: -1955.1719970703125 and parameters: {'r_scaling': 23.20124283127226	'unroll': 3	'update_epoch': 9	'discount': 0.9615437404182697	'lr': 0.00013585581988318098	'entropy': 0.0005844155788572528}. Best is trial 171 with value: -2681.271240234375. [0m
[32m[I 2022-01-21 00:28:45	922] [0m Trial 197 finished with value: -624.3741455078125 and parameters: {'r_scaling': 4.5564158251364475	'unroll': 2	'update_epoch': 12	'discount': 0.9684763138846718	'lr': 0.00012405140356107005	'entropy': 0.0004232312798839148}. Best is trial 171 with value: -2681.271240234375. [0m
[32m[I 2022-01-21 00:31:44	587] [0m Trial 198 finished with value: 112.05101013183594 and parameters: {'r_scaling': 11.097444503884093	'unroll': 9	'update_epoch': 11	'discount': 0.963919111410819	'lr': 0.00010001537139969333	'entropy': 0.0003174496782012062}. Best is trial 171 with value: -2681.271240234375. [0m
[32m[I 2022-01-21 00:34:44	088] [0m Trial 199 finished with value: -2066.256103515625 and parameters: {'r_scaling': 27.398844530422547	'unroll': 3	'update_epoch': 12	'discount': 0.9599655979116432	'lr': 0.00013806476517969518	'entropy': 0.00023271046164989286}. Best is trial 171 with value: -2681.271240234375. [0m
