# Supplementary material
Source: ML conference proceedings conference paper supplement (https://proceedings.neurips.cc/paper_files/paper/2022/hash/10a6bdcabbd5a3d36b760daa295f63c1-Abstract.html)
Supplement: Supplementary file 1 [file 10a6bdcabbd5a3d36b760daa295f63c1-Supplemental-Conference.zip › neurips2022/code/robotics_code/hp_searches/humanoid_10M.log]

[32m[I 2021-12-11 00:07:41	608] [0m A new study created in memory with name: no-name-084afed4-b5e2-4175-821c-296985fe5515 [0m
[32m[I 2021-12-11 00:10:51	627] [0m Trial 0 finished with value: -444.78350830078125 and parameters: {'r_scaling': 151.66924086328117	'unroll': 12	'update_epoch': 7	'discount': 0.9043062343302866	'lr': 0.0003135581060580007	'entropy': 0.00010907351151162438}. Best is trial 0 with value: -444.78350830078125. [0m
[32m[I 2021-12-11 00:13:52	629] [0m Trial 1 finished with value: -319.9524230957031 and parameters: {'r_scaling': 45.46890571583326	'unroll': 8	'update_epoch': 7	'discount': 0.988922239063729	'lr': 0.0008074783775505646	'entropy': 0.0026604806062881722}. Best is trial 0 with value: -444.78350830078125. [0m
[32m[I 2021-12-11 00:16:55	147] [0m Trial 2 finished with value: -319.06768798828125 and parameters: {'r_scaling': 30.57562744762223	'unroll': 9	'update_epoch': 2	'discount': 0.9191003846092468	'lr': 0.00019674286519007772	'entropy': 0.005015517772754112}. Best is trial 0 with value: -444.78350830078125. [0m
[32m[I 2021-12-11 00:20:47	058] [0m Trial 3 finished with value: -883.6776733398438 and parameters: {'r_scaling': 0.15896979666523106	'unroll': 4	'update_epoch': 15	'discount': 0.9110354674595861	'lr': 0.00014850162990165148	'entropy': 0.006468566997731247}. Best is trial 3 with value: -883.6776733398438. [0m
[32m[I 2021-12-11 00:24:12	398] [0m Trial 4 finished with value: -501.64166259765625 and parameters: {'r_scaling': 3.6963724457091693	'unroll': 6	'update_epoch': 8	'discount': 0.9525182308188457	'lr': 0.0005337883652684559	'entropy': 0.0024112883458699075}. Best is trial 3 with value: -883.6776733398438. [0m
[32m[I 2021-12-11 00:27:21	534] [0m Trial 5 finished with value: -428.3525695800781 and parameters: {'r_scaling': 90.80332793642788	'unroll': 8	'update_epoch': 7	'discount': 0.9123700696613433	'lr': 0.0002961119849395928	'entropy': 0.00043218175960295276}. Best is trial 3 with value: -883.6776733398438. [0m
[32m[I 2021-12-11 00:30:35	483] [0m Trial 6 finished with value: -453.3834228515625 and parameters: {'r_scaling': 1.5592430354854574	'unroll': 10	'update_epoch': 5	'discount': 0.905236263599839	'lr': 0.00017986522148334593	'entropy': 0.0028613896035257587}. Best is trial 3 with value: -883.6776733398438. [0m
[32m[I 2021-12-11 00:33:55	656] [0m Trial 7 finished with value: -419.2199401855469 and parameters: {'r_scaling': 2.2062715340965022	'unroll': 15	'update_epoch': 2	'discount': 0.9923961124749167	'lr': 0.000126481563099874	'entropy': 0.0002915917485808499}. Best is trial 3 with value: -883.6776733398438. [0m
[32m[I 2021-12-11 00:37:56	438] [0m Trial 8 finished with value: -298.6494445800781 and parameters: {'r_scaling': 0.8167862520533102	'unroll': 2	'update_epoch': 8	'discount': 0.9602614748699145	'lr': 0.0016333257720481148	'entropy': 0.0005626185051981994}. Best is trial 3 with value: -883.6776733398438. [0m
[32m[I 2021-12-11 00:41:19	082] [0m Trial 9 finished with value: -706.2805786132812 and parameters: {'r_scaling': 0.3089313490088024	'unroll': 4	'update_epoch': 2	'discount': 0.9285600293515425	'lr': 0.0010893255673083985	'entropy': 0.0004830569989533799}. Best is trial 3 with value: -883.6776733398438. [0m
[32m[I 2021-12-11 00:46:26	661] [0m Trial 10 finished with value: -423.0445251464844 and parameters: {'r_scaling': 0.06394712789600128	'unroll': 1	'update_epoch': 15	'discount': 0.9349419890045214	'lr': 0.00010192242883316783	'entropy': 0.05761340523651895}. Best is trial 3 with value: -883.6776733398438. [0m
[32m[I 2021-12-11 00:50:02	010] [0m Trial 11 finished with value: -644.4315795898438 and parameters: {'r_scaling': 0.10015145509650325	'unroll': 6	'update_epoch': 14	'discount': 0.9295872185675379	'lr': 0.001338405589401899	'entropy': 0.013083578124564767}. Best is trial 3 with value: -883.6776733398438. [0m
[32m[I 2021-12-11 00:53:50	137] [0m Trial 12 finished with value: -1014.0994262695312 and parameters: {'r_scaling': 0.4623152090027421	'unroll': 4	'update_epoch': 12	'discount': 0.931202029081114	'lr': 0.0007904431684964376	'entropy': 0.013530202323882357}. Best is trial 12 with value: -1014.0994262695312. [0m
[32m[I 2021-12-11 00:57:45	013] [0m Trial 13 finished with value: -927.2659301757812 and parameters: {'r_scaling': 0.2343569869355972	'unroll': 4	'update_epoch': 12	'discount': 0.9410021484772059	'lr': 0.0006345446030862503	'entropy': 0.025913431483697656}. Best is trial 12 with value: -1014.0994262695312. [0m
[32m[I 2021-12-11 01:01:41	901] [0m Trial 14 finished with value: -1173.4666748046875 and parameters: {'r_scaling': 0.4493424928947484	'unroll': 4	'update_epoch': 12	'discount': 0.9649157851866043	'lr': 0.0006821585106689328	'entropy': 0.05878645344121862}. Best is trial 14 with value: -1173.4666748046875. [0m
[32m[I 2021-12-11 01:05:26	567] [0m Trial 15 finished with value: -684.5613403320312 and parameters: {'r_scaling': 7.733713997256009	'unroll': 6	'update_epoch': 11	'discount': 0.9690901162309381	'lr': 0.0008386077047084742	'entropy': 0.09522315819968605}. Best is trial 14 with value: -1173.4666748046875. [0m
[32m[I 2021-12-11 01:09:32	007] [0m Trial 16 finished with value: -1399.743408203125 and parameters: {'r_scaling': 0.5511165593785848	'unroll': 2	'update_epoch': 11	'discount': 0.972536013255989	'lr': 0.00039585974824791185	'entropy': 0.029254760415861544}. Best is trial 16 with value: -1399.743408203125. [0m
[32m[I 2021-12-11 01:13:25	733] [0m Trial 17 finished with value: -617.39501953125 and parameters: {'r_scaling': 7.883702538009878	'unroll': 2	'update_epoch': 10	'discount': 0.9753005430362701	'lr': 0.00036623269307918885	'entropy': 0.031820611428847}. Best is trial 16 with value: -1399.743408203125. [0m
[32m[I 2021-12-11 01:17:40	425] [0m Trial 18 finished with value: -1694.534912109375 and parameters: {'r_scaling': 0.762869636811461	'unroll': 1	'update_epoch': 10	'discount': 0.9793926725731588	'lr': 0.0004273867444082446	'entropy': 0.08533224558469633}. Best is trial 18 with value: -1694.534912109375. [0m
[32m[I 2021-12-11 01:22:01	213] [0m Trial 19 finished with value: -2202.0361328125 and parameters: {'r_scaling': 0.9825302154142161	'unroll': 1	'update_epoch': 10	'discount': 0.9809017150590202	'lr': 0.0003989764183267263	'entropy': 0.09633137119675346}. Best is trial 19 with value: -2202.0361328125. [0m
[32m[I 2021-12-11 01:25:47	757] [0m Trial 20 finished with value: -623.07177734375 and parameters: {'r_scaling': 1.2540887842474489	'unroll': 1	'update_epoch': 5	'discount': 0.9817849082160163	'lr': 0.00047426503617326867	'entropy': 0.07836823196675084}. Best is trial 19 with value: -2202.0361328125. [0m
[32m[I 2021-12-11 01:29:52	205] [0m Trial 21 finished with value: -679.028564453125 and parameters: {'r_scaling': 4.542894177919921	'unroll': 2	'update_epoch': 10	'discount': 0.9784429325547424	'lr': 0.000268172913000177	'entropy': 0.03435618156038192}. Best is trial 19 with value: -2202.0361328125. [0m
[32m[I 2021-12-11 01:34:10	897] [0m Trial 22 finished with value: -1106.818603515625 and parameters: {'r_scaling': 0.7520870358195594	'unroll': 1	'update_epoch': 10	'discount': 0.9551771207390354	'lr': 0.0003637203657574702	'entropy': 0.017092544925980575}. Best is trial 19 with value: -2202.0361328125. [0m
[32m[I 2021-12-11 01:38:30	863] [0m Trial 23 finished with value: -3571.24853515625 and parameters: {'r_scaling': 0.8080752834398609	'unroll': 3	'update_epoch': 13	'discount': 0.9849332546541096	'lr': 0.00022090860475053588	'entropy': 0.09881445364842649}. Best is trial 23 with value: -3571.24853515625. [0m
[32m[I 2021-12-11 01:42:51	116] [0m Trial 24 finished with value: -740.041259765625 and parameters: {'r_scaling': 13.035325069464214	'unroll': 3	'update_epoch': 13	'discount': 0.9846967650979028	'lr': 0.00020751772221115893	'entropy': 0.051748251506468654}. Best is trial 23 with value: -3571.24853515625. [0m
[32m[I 2021-12-11 01:46:36	210] [0m Trial 25 finished with value: -1286.3111572265625 and parameters: {'r_scaling': 1.1313562116667255	'unroll': 5	'update_epoch': 9	'discount': 0.9914079295110466	'lr': 0.00024068710927128653	'entropy': 0.09798340529446622}. Best is trial 23 with value: -3571.24853515625. [0m
[32m[I 2021-12-11 01:50:58	168] [0m Trial 26 finished with value: -1494.1435546875 and parameters: {'r_scaling': 2.360409903815162	'unroll': 3	'update_epoch': 13	'discount': 0.966771938041216	'lr': 0.0005436232732675679	'entropy': 0.00860436482905934}. Best is trial 23 with value: -3571.24853515625. [0m
[32m[I 2021-12-11 01:55:19	157] [0m Trial 27 finished with value: -3859.5517578125 and parameters: {'r_scaling': 0.18321543963343342	'unroll': 1	'update_epoch': 9	'discount': 0.9836576729473409	'lr': 0.0004043297280506709	'entropy': 0.001054461261419303}. Best is trial 27 with value: -3859.5517578125. [0m
[32m[I 2021-12-11 01:58:53	772] [0m Trial 28 finished with value: -862.6637573242188 and parameters: {'r_scaling': 0.16323517666788775	'unroll': 3	'update_epoch': 5	'discount': 0.9850544086976855	'lr': 0.0002310082866544157	'entropy': 0.001406649698198453}. Best is trial 27 with value: -3859.5517578125. [0m
[32m[I 2021-12-11 02:02:24	168] [0m Trial 29 finished with value: -694.5643920898438 and parameters: {'r_scaling': 0.0951598248692905	'unroll': 13	'update_epoch': 9	'discount': 0.994107619568641	'lr': 0.00031008992795838493	'entropy': 0.00011866353852258812}. Best is trial 27 with value: -3859.5517578125. [0m
[32m[I 2021-12-11 02:05:34	260] [0m Trial 30 finished with value: -639.3115234375 and parameters: {'r_scaling': 0.05116567890976834	'unroll': 11	'update_epoch': 6	'discount': 0.9469346300642323	'lr': 0.00016018703256089894	'entropy': 0.0011993211988511284}. Best is trial 27 with value: -3859.5517578125. [0m
[32m[I 2021-12-11 02:09:52	003] [0m Trial 31 finished with value: -1103.184814453125 and parameters: {'r_scaling': 0.29132670418037626	'unroll': 1	'update_epoch': 9	'discount': 0.9757488370187278	'lr': 0.00042655762056749343	'entropy': 0.0010682797809021406}. Best is trial 27 with value: -3859.5517578125. [0m
[32m[I 2021-12-11 02:14:19	478] [0m Trial 32 finished with value: -1377.533935546875 and parameters: {'r_scaling': 0.7167458755089446	'unroll': 1	'update_epoch': 11	'discount': 0.9858181682991085	'lr': 0.00034089617300358404	'entropy': 0.05076545581623105}. Best is trial 27 with value: -3859.5517578125. [0m
[32m[I 2021-12-11 02:18:40	634] [0m Trial 33 finished with value: -2110.14404296875 and parameters: {'r_scaling': 1.6882160667310415	'unroll': 2	'update_epoch': 13	'discount': 0.9806165192774007	'lr': 0.00045885820819264485	'entropy': 0.04410566568066608}. Best is trial 27 with value: -3859.5517578125. [0m
[32m[I 2021-12-11 02:23:00	185] [0m Trial 34 finished with value: -2135.087158203125 and parameters: {'r_scaling': 1.6854005438754054	'unroll': 3	'update_epoch': 14	'discount': 0.9720826693126712	'lr': 0.0005181784352353448	'entropy': 0.004376485980476434}. Best is trial 27 with value: -3859.5517578125. [0m
[32m[I 2021-12-11 02:27:12	763] [0m Trial 35 finished with value: -854.1519165039062 and parameters: {'r_scaling': 6.070758561000764	'unroll': 5	'update_epoch': 14	'discount': 0.960131930109132	'lr': 0.0005712889834802718	'entropy': 0.0044217537745608205}. Best is trial 27 with value: -3859.5517578125. [0m
[32m[I 2021-12-11 02:31:20	023] [0m Trial 36 finished with value: -457.66571044921875 and parameters: {'r_scaling': 19.220001470654978	'unroll': 7	'update_epoch': 14	'discount': 0.9723766699559859	'lr': 0.000952611404664609	'entropy': 0.00020995317902028357}. Best is trial 27 with value: -3859.5517578125. [0m
[32m[I 2021-12-11 02:35:47	174] [0m Trial 37 finished with value: -1068.8424072265625 and parameters: {'r_scaling': 3.0407627903785173	'unroll': 3	'update_epoch': 15	'discount': 0.98922335257558	'lr': 0.00026660514419653644	'entropy': 0.0019454698186695675}. Best is trial 27 with value: -3859.5517578125. [0m
[32m[I 2021-12-11 02:39:58	045] [0m Trial 38 finished with value: -791.513671875 and parameters: {'r_scaling': 146.78048290762433	'unroll': 5	'update_epoch': 13	'discount': 0.9945860377894252	'lr': 0.0006905759304401881	'entropy': 0.0008855899245541813}. Best is trial 27 with value: -3859.5517578125. [0m
[32m[I 2021-12-11 02:43:18	419] [0m Trial 39 finished with value: -691.5845336914062 and parameters: {'r_scaling': 0.14706212680617822	'unroll': 9	'update_epoch': 7	'discount': 0.9635719014124092	'lr': 0.00018140055958253284	'entropy': 0.00419075817766599}. Best is trial 27 with value: -3859.5517578125. [0m
[32m[I 2021-12-11 02:46:58	291] [0m Trial 40 finished with value: -863.9895629882812 and parameters: {'r_scaling': 1.1035741577275877	'unroll': 7	'update_epoch': 8	'discount': 0.9531398935494022	'lr': 0.0005036474168471582	'entropy': 0.000701142046172652}. Best is trial 27 with value: -3859.5517578125. [0m
[32m[I 2021-12-11 02:51:14	686] [0m Trial 41 finished with value: -751.7391357421875 and parameters: {'r_scaling': 1.7617520363721453	'unroll': 2	'update_epoch': 13	'discount': 0.980309889591476	'lr': 0.0004653545320026957	'entropy': 0.007077008187621953}. Best is trial 27 with value: -3859.5517578125. [0m
[32m[I 2021-12-11 02:55:42	794] [0m Trial 42 finished with value: -893.8921508789062 and parameters: {'r_scaling': 2.9755659710947677	'unroll': 3	'update_epoch': 14	'discount': 0.9845281715865548	'lr': 0.0003082723257663746	'entropy': 0.040819379052518076}. Best is trial 27 with value: -3859.5517578125. [0m
[32m[I 2021-12-11 03:00:17	553] [0m Trial 43 finished with value: -1022.2965087890625 and parameters: {'r_scaling': 1.6072324974973569	'unroll': 2	'update_epoch': 15	'discount': 0.9887808583071381	'lr': 0.0006121052799104063	'entropy': 0.01980025802848103}. Best is trial 27 with value: -3859.5517578125. [0m
[32m[I 2021-12-11 03:04:31	777] [0m Trial 44 finished with value: -584.1649780273438 and parameters: {'r_scaling': 4.264827045651669	'unroll': 2	'update_epoch': 12	'discount': 0.9698563225905767	'lr': 0.00040874382862445067	'entropy': 0.0018307592547988486}. Best is trial 27 with value: -3859.5517578125. [0m
[32m[I 2021-12-11 03:08:52	676] [0m Trial 45 finished with value: -1680.8594970703125 and parameters: {'r_scaling': 0.3237162971810897	'unroll': 3	'update_epoch': 11	'discount': 0.9794685613617774	'lr': 0.00013031627209944465	'entropy': 0.07090765393199477}. Best is trial 27 with value: -3859.5517578125. [0m
[32m[I 2021-12-11 03:12:18	772] [0m Trial 46 finished with value: -329.68115234375 and parameters: {'r_scaling': 1.9275459731948434	'unroll': 1	'update_epoch': 1	'discount': 0.9755403523416137	'lr': 0.0019446751414556214	'entropy': 0.002963489198828909}. Best is trial 27 with value: -3859.5517578125. [0m
[32m[I 2021-12-11 03:16:16	742] [0m Trial 47 finished with value: -431.527587890625 and parameters: {'r_scaling': 0.4925500080089812	'unroll': 15	'update_epoch': 14	'discount': 0.923130937530317	'lr': 0.0007209563590542273	'entropy': 0.00033446554587279845}. Best is trial 27 with value: -3859.5517578125. [0m
[32m[I 2021-12-11 03:19:55	644] [0m Trial 48 finished with value: -942.3533935546875 and parameters: {'r_scaling': 0.19607901053897547	'unroll': 4	'update_epoch': 8	'discount': 0.9594303854495857	'lr': 0.0011493066942846182	'entropy': 0.010024847554458925}. Best is trial 27 with value: -3859.5517578125. [0m
[32m[I 2021-12-11 03:24:08	375] [0m Trial 49 finished with value: -3017.43603515625 and parameters: {'r_scaling': 1.0090071421370457	'unroll': 5	'update_epoch': 12	'discount': 0.9887434218816	'lr': 0.00033768076574076786	'entropy': 0.021354857251728615}. Best is trial 27 with value: -3859.5517578125. [0m
[32m[I 2021-12-11 03:28:11	053] [0m Trial 50 finished with value: -5992.3134765625 and parameters: {'r_scaling': 0.34619494102431253	'unroll': 5	'update_epoch': 12	'discount': 0.9870983747278327	'lr': 0.0003286241063971576	'entropy': 0.016889792515654985}. Best is trial 50 with value: -5992.3134765625. [0m
[32m[I 2021-12-11 03:31:58	114] [0m Trial 51 finished with value: -849.7214965820312 and parameters: {'r_scaling': 0.4252729352371005	'unroll': 6	'update_epoch': 12	'discount': 0.9882636953681023	'lr': 0.00027926434368969735	'entropy': 0.006454842212693404}. Best is trial 50 with value: -5992.3134765625. [0m
[32m[I 2021-12-11 03:35:54	508] [0m Trial 52 finished with value: -6099.1162109375 and parameters: {'r_scaling': 0.1047587029182167	'unroll': 5	'update_epoch': 11	'discount': 0.991951053124066	'lr': 0.00035064704030197984	'entropy': 0.024065540369869673}. Best is trial 52 with value: -6099.1162109375. [0m
[32m[I 2021-12-11 03:39:36	648] [0m Trial 53 finished with value: -5860.712890625 and parameters: {'r_scaling': 0.1341001207565648	'unroll': 7	'update_epoch': 11	'discount': 0.9901917391897764	'lr': 0.00032756125532853043	'entropy': 0.02317236310811061}. Best is trial 52 with value: -6099.1162109375. [0m
[32m[I 2021-12-11 03:43:18	535] [0m Trial 54 finished with value: -6572.984375 and parameters: {'r_scaling': 0.10419457940291349	'unroll': 7	'update_epoch': 11	'discount': 0.9913656473997465	'lr': 0.00033786822470803626	'entropy': 0.02246577476954896}. Best is trial 54 with value: -6572.984375. [0m
[32m[I 2021-12-11 03:46:57	381] [0m Trial 55 finished with value: -5212.7626953125 and parameters: {'r_scaling': 0.09611297640004711	'unroll': 7	'update_epoch': 11	'discount': 0.9945667889654796	'lr': 0.00023069087116333865	'entropy': 0.014717875233101427}. Best is trial 54 with value: -6572.984375. [0m
[32m[I 2021-12-11 03:50:22	076] [0m Trial 56 finished with value: -1073.10400390625 and parameters: {'r_scaling': 0.08696406220393865	'unroll': 9	'update_epoch': 11	'discount': 0.9949727254761473	'lr': 0.0002471816342292634	'entropy': 0.013714118827198052}. Best is trial 54 with value: -6572.984375. [0m
[32m[I 2021-12-11 03:54:05	320] [0m Trial 57 finished with value: -5015.41064453125 and parameters: {'r_scaling': 0.1339046688982034	'unroll': 7	'update_epoch': 9	'discount': 0.9917059073410576	'lr': 0.0003637384696693615	'entropy': 0.025606327343382293}. Best is trial 54 with value: -6572.984375. [0m
[32m[I 2021-12-11 03:57:51	096] [0m Trial 58 finished with value: -4743.05126953125 and parameters: {'r_scaling': 0.12655268074415066	'unroll': 7	'update_epoch': 11	'discount': 0.9907727079407218	'lr': 0.00019709744257188666	'entropy': 0.024838367692167056}. Best is trial 54 with value: -6572.984375. [0m
[32m[I 2021-12-11 04:01:08	407] [0m Trial 59 finished with value: -1277.1380615234375 and parameters: {'r_scaling': 0.06525203997422807	'unroll': 8	'update_epoch': 10	'discount': 0.9909662715225996	'lr': 0.0003366387500582583	'entropy': 0.015302062129331025}. Best is trial 54 with value: -6572.984375. [0m
[32m[I 2021-12-11 04:04:53	625] [0m Trial 60 finished with value: -786.5733642578125 and parameters: {'r_scaling': 0.06870743205132097	'unroll': 7	'update_epoch': 10	'discount': 0.9114395319237277	'lr': 0.0003000131962303434	'entropy': 0.010321913315944571}. Best is trial 54 with value: -6572.984375. [0m
[32m[I 2021-12-11 04:08:22	168] [0m Trial 61 finished with value: -900.9912109375 and parameters: {'r_scaling': 0.13170932551950107	'unroll': 8	'update_epoch': 11	'discount': 0.9930315445856185	'lr': 0.00019956291078264404	'entropy': 0.02401883520673854}. Best is trial 54 with value: -6572.984375. [0m
[32m[I 2021-12-11 04:12:08	221] [0m Trial 62 finished with value: -4854.91552734375 and parameters: {'r_scaling': 0.11602996908455661	'unroll': 6	'update_epoch': 11	'discount': 0.9904188196116135	'lr': 0.00016626115259869403	'entropy': 0.03177429281288992}. Best is trial 54 with value: -6572.984375. [0m
[32m[I 2021-12-11 04:15:49	593] [0m Trial 63 finished with value: -667.2288208007812 and parameters: {'r_scaling': 0.22978551283338913	'unroll': 6	'update_epoch': 11	'discount': 0.9003344920167521	'lr': 0.0001528108228992162	'entropy': 0.03573384965491848}. Best is trial 54 with value: -6572.984375. [0m
[32m[I 2021-12-11 04:19:13	471] [0m Trial 64 finished with value: -1020.3494262695312 and parameters: {'r_scaling': 0.10550589299747148	'unroll': 9	'update_epoch': 12	'discount': 0.987288898429418	'lr': 0.00017463834183895584	'entropy': 0.029682083354531524}. Best is trial 54 with value: -6572.984375. [0m
[32m[I 2021-12-11 04:22:57	291] [0m Trial 65 finished with value: -2460.693603515625 and parameters: {'r_scaling': 0.07517681870083694	'unroll': 6	'update_epoch': 9	'discount': 0.9916618073320485	'lr': 0.00011047049493455104	'entropy': 0.02002890499373373}. Best is trial 54 with value: -6572.984375. [0m
[32m[I 2021-12-11 04:26:14	298] [0m Trial 66 finished with value: -884.82421875 and parameters: {'r_scaling': 0.11680720292273813	'unroll': 8	'update_epoch': 10	'discount': 0.9829520807312164	'lr': 0.000377001290495179	'entropy': 0.011083614719271283}. Best is trial 54 with value: -6572.984375. [0m
[32m[I 2021-12-11 04:29:56	239] [0m Trial 67 finished with value: -5625.48779296875 and parameters: {'r_scaling': 0.0501930911358302	'unroll': 5	'update_epoch': 7	'discount': 0.9872814901705339	'lr': 0.0002569006076463601	'entropy': 0.01649405375761217}. Best is trial 54 with value: -6572.984375. [0m
[32m[I 2021-12-11 04:33:07	777] [0m Trial 68 finished with value: -904.717041015625 and parameters: {'r_scaling': 0.05890325920311911	'unroll': 10	'update_epoch': 7	'discount': 0.9777127088140929	'lr': 0.0002590422369431022	'entropy': 0.017022003308321314}. Best is trial 54 with value: -6572.984375. [0m
[32m[I 2021-12-11 04:36:44	080] [0m Trial 69 finished with value: -815.4075927734375 and parameters: {'r_scaling': 0.2399354603458535	'unroll': 7	'update_epoch': 8	'discount': 0.9861147674835804	'lr': 0.0002853280669047221	'entropy': 0.008293077129793769}. Best is trial 54 with value: -6572.984375. [0m
[32m[I 2021-12-11 04:40:18	543] [0m Trial 70 finished with value: -2198.35546875 and parameters: {'r_scaling': 0.08818609614011376	'unroll': 5	'update_epoch': 4	'discount': 0.9949530484754318	'lr': 0.00021576239245375337	'entropy': 0.013305615438027264}. Best is trial 54 with value: -6572.984375. [0m
[32m[I 2021-12-11 04:44:05	035] [0m Trial 71 finished with value: -3322.878173828125 and parameters: {'r_scaling': 0.05032665145054798	'unroll': 6	'update_epoch': 12	'discount': 0.9902813948115975	'lr': 0.00034533550171639244	'entropy': 0.028073262181101247}. Best is trial 54 with value: -6572.984375. [0m
[32m[I 2021-12-11 04:47:33	315] [0m Trial 72 finished with value: -2553.053466796875 and parameters: {'r_scaling': 0.1748240390486268	'unroll': 7	'update_epoch': 7	'discount': 0.9823533801175969	'lr': 0.0002392836825233693	'entropy': 0.03858011074525522}. Best is trial 54 with value: -6572.984375. [0m
[32m[I 2021-12-11 04:51:05	713] [0m Trial 73 finished with value: -836.3919067382812 and parameters: {'r_scaling': 0.08305682706404241	'unroll': 5	'update_epoch': 6	'discount': 0.9392019750454256	'lr': 0.0003071255227226444	'entropy': 0.01699857590285073}. Best is trial 54 with value: -6572.984375. [0m
[32m[I 2021-12-11 04:54:30	227] [0m Trial 74 finished with value: -737.807373046875 and parameters: {'r_scaling': 0.3119942991226995	'unroll': 6	'update_epoch': 6	'discount': 0.9859202907567998	'lr': 0.00036686685911247623	'entropy': 0.023306324261588532}. Best is trial 54 with value: -6572.984375. [0m
[32m[I 2021-12-11 04:57:49	364] [0m Trial 75 finished with value: -955.3453369140625 and parameters: {'r_scaling': 0.11571115557829323	'unroll': 8	'update_epoch': 10	'discount': 0.9919598618286681	'lr': 0.00018344738667639494	'entropy': 0.06777913971693415}. Best is trial 54 with value: -6572.984375. [0m
[32m[I 2021-12-11 05:01:34	619] [0m Trial 76 finished with value: -2044.2998046875 and parameters: {'r_scaling': 0.15513983175004864	'unroll': 4	'update_epoch': 9	'discount': 0.9876697365745079	'lr': 0.0003282333212458486	'entropy': 0.046083964282408046}. Best is trial 54 with value: -6572.984375. [0m
[32m[I 2021-12-11 05:05:19	281] [0m Trial 77 finished with value: -5158.6162109375 and parameters: {'r_scaling': 0.2293345271620536	'unroll': 7	'update_epoch': 11	'discount': 0.9774204140945987	'lr': 0.00022265056396402532	'entropy': 0.029571638088619703}. Best is trial 54 with value: -6572.984375. [0m
[32m[I 2021-12-11 05:08:38	464] [0m Trial 78 finished with value: -942.7158203125 and parameters: {'r_scaling': 0.19965426323344868	'unroll': 8	'update_epoch': 12	'discount': 0.9829670820973151	'lr': 0.0002583340926214393	'entropy': 0.012036122630297743}. Best is trial 54 with value: -6572.984375. [0m
[32m[I 2021-12-11 05:12:19	537] [0m Trial 79 finished with value: -1333.4715576171875 and parameters: {'r_scaling': 0.3563580500344124	'unroll': 7	'update_epoch': 11	'discount': 0.978591331954547	'lr': 0.0002285598540167689	'entropy': 0.019939466243249132}. Best is trial 54 with value: -6572.984375. [0m
[32m[I 2021-12-11 05:16:03	122] [0m Trial 80 finished with value: -5823.3974609375 and parameters: {'r_scaling': 0.05955289433245988	'unroll': 5	'update_epoch': 9	'discount': 0.9930055016949944	'lr': 0.0002769281325096805	'entropy': 0.005920393029114607}. Best is trial 54 with value: -6572.984375. [0m
[32m[I 2021-12-11 05:19:48	899] [0m Trial 81 finished with value: -5938.04296875 and parameters: {'r_scaling': 0.061685437007834874	'unroll': 5	'update_epoch': 9	'discount': 0.9926804601535917	'lr': 0.0002708192283977395	'entropy': 0.014834862397637837}. Best is trial 54 with value: -6572.984375. [0m
[32m[I 2021-12-11 05:23:31	705] [0m Trial 82 finished with value: -4373.529296875 and parameters: {'r_scaling': 0.05975716458638405	'unroll': 4	'update_epoch': 8	'discount': 0.9871003084959894	'lr': 0.00028774226098464976	'entropy': 0.006028967852233834}. Best is trial 54 with value: -6572.984375. [0m
[32m[I 2021-12-11 05:27:22	227] [0m Trial 83 finished with value: -5924.0400390625 and parameters: {'r_scaling': 0.05017089584687156	'unroll': 5	'update_epoch': 10	'discount': 0.9936099594065373	'lr': 0.000211113456195915	'entropy': 0.01534119358539733}. Best is trial 54 with value: -6572.984375. [0m
[32m[I 2021-12-11 05:31:10	060] [0m Trial 84 finished with value: -6172.5341796875 and parameters: {'r_scaling': 0.050547860881912474	'unroll': 5	'update_epoch': 10	'discount': 0.9933122743440803	'lr': 0.0002714144777454988	'entropy': 0.00879226758411661}. Best is trial 54 with value: -6572.984375. [0m
[32m[I 2021-12-11 05:34:53	531] [0m Trial 85 finished with value: -5643.73779296875 and parameters: {'r_scaling': 0.051080231625354806	'unroll': 5	'update_epoch': 9	'discount': 0.9925598879405435	'lr': 0.0002622170091730917	'entropy': 0.008549782947934254}. Best is trial 54 with value: -6572.984375. [0m
[32m[I 2021-12-11 05:38:29	062] [0m Trial 86 finished with value: -5485.115234375 and parameters: {'r_scaling': 0.06882243895322973	'unroll': 4	'update_epoch': 10	'discount': 0.9930951231899513	'lr': 0.000434426285524118	'entropy': 0.008077987007693846}. Best is trial 54 with value: -6572.984375. [0m
[32m[I 2021-12-11 05:42:15	478] [0m Trial 87 finished with value: -6711.658203125 and parameters: {'r_scaling': 0.07676565046002846	'unroll': 5	'update_epoch': 9	'discount': 0.989772297575905	'lr': 0.0003182814684311819	'entropy': 0.005637850608791373}. Best is trial 87 with value: -6711.658203125. [0m
[32m[I 2021-12-11 05:46:13	850] [0m Trial 88 finished with value: -6658.7041015625 and parameters: {'r_scaling': 0.07991026809557845	'unroll': 5	'update_epoch': 9	'discount': 0.9839744446886319	'lr': 0.0003192476212196075	'entropy': 0.009598565857009082}. Best is trial 87 with value: -6711.658203125. [0m
[32m[I 2021-12-11 05:50:02	881] [0m Trial 89 finished with value: -1077.907470703125 and parameters: {'r_scaling': 0.07726053011136379	'unroll': 5	'update_epoch': 10	'discount': 0.915699946524999	'lr': 0.00031551161542640275	'entropy': 0.005111281178562024}. Best is trial 87 with value: -6711.658203125. [0m
[32m[I 2021-12-11 05:53:34	589] [0m Trial 90 finished with value: -1697.4820556640625 and parameters: {'r_scaling': 0.09956334118821225	'unroll': 4	'update_epoch': 10	'discount': 0.9837933270841296	'lr': 0.000414187377947667	'entropy': 0.011498410066193237}. Best is trial 87 with value: -6711.658203125. [0m
[32m[I 2021-12-11 05:57:14	575] [0m Trial 91 finished with value: -5957.5302734375 and parameters: {'r_scaling': 0.060621411492057554	'unroll': 5	'update_epoch': 9	'discount': 0.9890315897771277	'lr': 0.00028103391048081886	'entropy': 0.0038484088954990037}. Best is trial 87 with value: -6711.658203125. [0m
[32m[I 2021-12-11 06:00:46	815] [0m Trial 92 finished with value: -1392.9644775390625 and parameters: {'r_scaling': 0.0785910791031813	'unroll': 6	'update_epoch': 9	'discount': 0.9895083787752875	'lr': 0.0003870231012721011	'entropy': 0.003450835515700268}. Best is trial 87 with value: -6711.658203125. [0m
[32m[I 2021-12-11 06:04:30	179] [0m Trial 93 finished with value: -6653.4013671875 and parameters: {'r_scaling': 0.09455939702957705	'unroll': 5	'update_epoch': 9	'discount': 0.9809532320196668	'lr': 0.000326036870704463	'entropy': 0.00987736998868857}. Best is trial 87 with value: -6711.658203125. [0m
[32m[I 2021-12-11 06:07:58	431] [0m Trial 94 finished with value: -2398.479736328125 and parameters: {'r_scaling': 0.06173164161798804	'unroll': 4	'update_epoch': 8	'discount': 0.9809464507543556	'lr': 0.0002920548326814719	'entropy': 0.003778757759827386}. Best is trial 87 with value: -6711.658203125. [0m
[32m[I 2021-12-11 06:11:54	359] [0m Trial 95 finished with value: -3671.7841796875 and parameters: {'r_scaling': 0.09664960205804424	'unroll': 5	'update_epoch': 9	'discount': 0.9844244622784376	'lr': 0.00034699062069925565	'entropy': 0.005379776133624006}. Best is trial 87 with value: -6711.658203125. [0m
[32m[I 2021-12-11 06:15:43	234] [0m Trial 96 finished with value: -2676.76025390625 and parameters: {'r_scaling': 0.07342600330936966	'unroll': 5	'update_epoch': 10	'discount': 0.9750684951484074	'lr': 0.0004846980158073477	'entropy': 0.002584125194314916}. Best is trial 87 with value: -6711.658203125. [0m
[32m[I 2021-12-11 06:19:13	413] [0m Trial 97 finished with value: -1062.96435546875 and parameters: {'r_scaling': 0.1556302699544044	'unroll': 4	'update_epoch': 8	'discount': 0.9886428029782444	'lr': 0.00031749037242847675	'entropy': 0.00724584372268722}. Best is trial 87 with value: -6711.658203125. [0m
[32m[I 2021-12-11 06:22:51	853] [0m Trial 98 finished with value: -4432.0263671875 and parameters: {'r_scaling': 0.08965723088072722	'unroll': 4	'update_epoch': 10	'discount': 0.9817455295881787	'lr': 0.0002463713886546633	'entropy': 0.010277236863724427}. Best is trial 87 with value: -6711.658203125. [0m
[32m[I 2021-12-11 06:26:24	792] [0m Trial 99 finished with value: -522.7951049804688 and parameters: {'r_scaling': 0.6079122690587082	'unroll': 6	'update_epoch': 9	'discount': 0.9854312189640472	'lr': 0.0003598291858607503	'entropy': 0.009478380718274743}. Best is trial 87 with value: -6711.658203125. [0m
[32m[I 2021-12-11 06:30:06	369] [0m Trial 100 finished with value: -5422.76611328125 and parameters: {'r_scaling': 0.05983459141316083	'unroll': 5	'update_epoch': 8	'discount': 0.9886259168101147	'lr': 0.0002958086272751861	'entropy': 0.007436259825032752}. Best is trial 87 with value: -6711.658203125. [0m
[32m[I 2021-12-11 06:33:34	017] [0m Trial 101 finished with value: -2229.16845703125 and parameters: {'r_scaling': 0.14302593430212535	'unroll': 6	'update_epoch': 9	'discount': 0.9902767685541249	'lr': 0.00032494452847709365	'entropy': 0.013515351953378982}. Best is trial 87 with value: -6711.658203125. [0m
[32m[I 2021-12-11 06:37:35	949] [0m Trial 102 finished with value: -6272.5693359375 and parameters: {'r_scaling': 0.10658548510212598	'unroll': 5	'update_epoch': 10	'discount': 0.9948917730002964	'lr': 0.0002762915529962062	'entropy': 0.01917304256499892}. Best is trial 87 with value: -6711.658203125. [0m
[32m[I 2021-12-11 06:41:28	286] [0m Trial 103 finished with value: -416.3295593261719 and parameters: {'r_scaling': 51.07044416010793	'unroll': 5	'update_epoch': 10	'discount': 0.9473243259364359	'lr': 0.0002749377594626765	'entropy': 0.002144203572111079}. Best is trial 87 with value: -6711.658203125. [0m
[32m[I 2021-12-11 06:45:11	045] [0m Trial 104 finished with value: -4445.2314453125 and parameters: {'r_scaling': 0.10591510119589694	'unroll': 4	'update_epoch': 10	'discount': 0.993457470172971	'lr': 0.00038514900612312907	'entropy': 0.018972884238538094}. Best is trial 87 with value: -6711.658203125. [0m
[32m[I 2021-12-11 06:48:47	103] [0m Trial 105 finished with value: -2569.556640625 and parameters: {'r_scaling': 0.07141964826104648	'unroll': 6	'update_epoch': 9	'discount': 0.9863744921700003	'lr': 0.00021418829428918008	'entropy': 0.012408750329575502}. Best is trial 87 with value: -6711.658203125. [0m
[32m[I 2021-12-11 06:52:38	363] [0m Trial 106 finished with value: -5882.09375 and parameters: {'r_scaling': 0.08548117535428361	'unroll': 5	'update_epoch': 10	'discount': 0.994618463478432	'lr': 0.000241725123302013	'entropy': 0.01846890939760176}. Best is trial 87 with value: -6711.658203125. [0m
[32m[I 2021-12-11 06:56:07	350] [0m Trial 107 finished with value: -3398.39306640625 and parameters: {'r_scaling': 0.11426501609004872	'unroll': 6	'update_epoch': 8	'discount': 0.9919558216554737	'lr': 0.00044523137259579675	'entropy': 0.009309260394941472}. Best is trial 87 with value: -6711.658203125. [0m
[32m[I 2021-12-11 06:59:33	772] [0m Trial 108 finished with value: -925.6424560546875 and parameters: {'r_scaling': 0.05640116610218868	'unroll': 13	'update_epoch': 9	'discount': 0.9892154178179423	'lr': 0.00020592122261650612	'entropy': 0.015182486116796285}. Best is trial 87 with value: -6711.658203125. [0m
[32m[I 2021-12-11 07:03:32	702] [0m Trial 109 finished with value: -7809.38330078125 and parameters: {'r_scaling': 0.07167732147626782	'unroll': 5	'update_epoch': 12	'discount': 0.9837594495045849	'lr': 0.00030409413348896877	'entropy': 0.004335844404455074}. Best is trial 109 with value: -7809.38330078125. [0m
[32m[I 2021-12-11 07:07:34	511] [0m Trial 110 finished with value: -1540.9638671875 and parameters: {'r_scaling': 0.1925153388924571	'unroll': 4	'update_epoch': 12	'discount': 0.983890515881439	'lr': 0.0003521410619701394	'entropy': 0.004412289314971636}. Best is trial 109 with value: -7809.38330078125. [0m
[32m[I 2021-12-11 07:11:08	183] [0m Trial 111 finished with value: -6175.46728515625 and parameters: {'r_scaling': 0.07085353275412136	'unroll': 5	'update_epoch': 11	'discount': 0.9870661201078195	'lr': 0.0002990167801728232	'entropy': 0.0036872346256306894}. Best is trial 109 with value: -7809.38330078125. [0m
[32m[I 2021-12-11 07:15:13	710] [0m Trial 112 finished with value: -7611.3388671875 and parameters: {'r_scaling': 0.07145560264196449	'unroll': 5	'update_epoch': 13	'discount': 0.9801629148656426	'lr': 0.0002993741879396452	'entropy': 0.0038765567915518603}. Best is trial 109 with value: -7809.38330078125. [0m
[32m[I 2021-12-11 07:19:01	521] [0m Trial 113 finished with value: -1424.62353515625 and parameters: {'r_scaling': 0.07219767012397783	'unroll': 6	'update_epoch': 13	'discount': 0.9737298623949445	'lr': 0.0002959282795143169	'entropy': 0.0030865007901597786}. Best is trial 109 with value: -7809.38330078125. [0m
[32m[I 2021-12-11 07:22:48	935] [0m Trial 114 finished with value: -2345.28173828125 and parameters: {'r_scaling': 0.09531319804855079	'unroll': 4	'update_epoch': 13	'discount': 0.981479286670696	'lr': 0.00031410239607775503	'entropy': 0.003833618951993704}. Best is trial 109 with value: -7809.38330078125. [0m
[32m[I 2021-12-11 07:26:49	020] [0m Trial 115 finished with value: -2992.73876953125 and parameters: {'r_scaling': 0.12491538644802355	'unroll': 5	'update_epoch': 12	'discount': 0.9796669746825154	'lr': 0.0003313655741108759	'entropy': 0.004745618192785757}. Best is trial 109 with value: -7809.38330078125. [0m
[32m[I 2021-12-11 07:30:55	065] [0m Trial 116 finished with value: -1750.0369873046875 and parameters: {'r_scaling': 0.2618073911394578	'unroll': 3	'update_epoch': 11	'discount': 0.9702945924475098	'lr': 0.0003991289450913498	'entropy': 0.003521320101974344}. Best is trial 109 with value: -7809.38330078125. [0m
[32m[I 2021-12-11 07:34:53	259] [0m Trial 117 finished with value: -7484.00830078125 and parameters: {'r_scaling': 0.08452718370118277	'unroll': 5	'update_epoch': 12	'discount': 0.9867168880067668	'lr': 0.0003027521781327697	'entropy': 0.005618080982404347}. Best is trial 109 with value: -7809.38330078125. [0m
[32m[I 2021-12-11 07:39:55	956] [0m Trial 118 finished with value: -2239.36669921875 and parameters: {'r_scaling': 0.08223879660044525	'unroll': 6	'update_epoch': 12	'discount': 0.9768025251788327	'lr': 0.0003730422117753744	'entropy': 0.005158500476989279}. Best is trial 109 with value: -7809.38330078125. [0m
[32m[I 2021-12-11 07:45:20	317] [0m Trial 119 finished with value: -4154.8349609375 and parameters: {'r_scaling': 0.15049851109625056	'unroll': 4	'update_epoch': 13	'discount': 0.9859393467640554	'lr': 0.00025306181691619393	'entropy': 0.0067411372542987335}. Best is trial 109 with value: -7809.38330078125. [0m
[32m[I 2021-12-11 07:49:23	969] [0m Trial 120 finished with value: -4403.6328125 and parameters: {'r_scaling': 0.10714761914941275	'unroll': 5	'update_epoch': 12	'discount': 0.9829179759463831	'lr': 0.0003079131428312648	'entropy': 0.001709840322338849}. Best is trial 109 with value: -7809.38330078125. [0m
[32m[I 2021-12-11 07:55:18	153] [0m Trial 121 finished with value: -6962.52490234375 and parameters: {'r_scaling': 0.06993294522373424	'unroll': 5	'update_epoch': 11	'discount': 0.9868678945450802	'lr': 0.00028411771227296486	'entropy': 0.004148361217897109}. Best is trial 109 with value: -7809.38330078125. [0m
[32m[I 2021-12-11 08:00:33	758] [0m Trial 122 finished with value: -3669.712890625 and parameters: {'r_scaling': 0.07870120311291262	'unroll': 6	'update_epoch': 11	'discount': 0.9871187570651943	'lr': 0.0003505543459020054	'entropy': 0.0058289499391704904}. Best is trial 109 with value: -7809.38330078125. [0m
[32m[I 2021-12-11 08:04:22	780] [0m Trial 123 finished with value: -2700.567626953125 and parameters: {'r_scaling': 0.1328067218456675	'unroll': 5	'update_epoch': 11	'discount': 0.9796229424593303	'lr': 0.00030142502999955473	'entropy': 0.003011523648440219}. Best is trial 109 with value: -7809.38330078125. [0m
[32m[I 2021-12-11 08:09:34	053] [0m Trial 124 finished with value: -1752.8785400390625 and parameters: {'r_scaling': 0.09639086838338767	'unroll': 5	'update_epoch': 12	'discount': 0.9850708302966317	'lr': 0.00027388802759919145	'entropy': 0.0025596813883996213}. Best is trial 109 with value: -7809.38330078125. [0m
[32m[I 2021-12-11 08:14:30	913] [0m Trial 125 finished with value: -6863.716796875 and parameters: {'r_scaling': 0.1677717267325483	'unroll': 5	'update_epoch': 11	'discount': 0.9905976004510363	'lr': 0.00033513357094231886	'entropy': 0.00451647198677277}. Best is trial 109 with value: -7809.38330078125. [0m
[32m[I 2021-12-11 08:19:05	724] [0m Trial 126 finished with value: -3693.472412109375 and parameters: {'r_scaling': 0.07014656383311309	'unroll': 4	'update_epoch': 11	'discount': 0.9912867725786727	'lr': 0.0002861737840911238	'entropy': 0.004471545750265556}. Best is trial 109 with value: -7809.38330078125. [0m
[32m[I 2021-12-11 08:23:43	829] [0m Trial 127 finished with value: -1905.0576171875 and parameters: {'r_scaling': 0.16974033974099464	'unroll': 6	'update_epoch': 11	'discount': 0.9901608254217785	'lr': 0.000332233270516835	'entropy': 0.0023242655481564315}. Best is trial 109 with value: -7809.38330078125. [0m
[32m[I 2021-12-11 08:28:19	695] [0m Trial 128 finished with value: -6798.47265625 and parameters: {'r_scaling': 0.1108555792492253	'unroll': 5	'update_epoch': 11	'discount': 0.9875063689251201	'lr': 0.00026591045955746284	'entropy': 0.006301318064294864}. Best is trial 109 with value: -7809.38330078125. [0m
[32m[I 2021-12-11 08:32:46	905] [0m Trial 129 finished with value: -5846.10498046875 and parameters: {'r_scaling': 0.08708426517034812	'unroll': 4	'update_epoch': 13	'discount': 0.9834890509320647	'lr': 0.0002671061306620886	'entropy': 0.006194691450294801}. Best is trial 109 with value: -7809.38330078125. [0m
[32m[I 2021-12-11 08:37:13	027] [0m Trial 130 finished with value: -1001.0686645507812 and parameters: {'r_scaling': 0.12225802075770421	'unroll': 5	'update_epoch': 11	'discount': 0.907564681654131	'lr': 0.0002330044923847172	'entropy': 0.007553450361027741}. Best is trial 109 with value: -7809.38330078125. [0m
[32m[I 2021-12-11 08:40:55	894] [0m Trial 131 finished with value: -3753.259033203125 and parameters: {'r_scaling': 0.10654539202751079	'unroll': 5	'update_epoch': 11	'discount': 0.9878726741122849	'lr': 0.0003112090584245665	'entropy': 0.005106876982276262}. Best is trial 109 with value: -7809.38330078125. [0m
[32m[I 2021-12-11 08:45:16	447] [0m Trial 132 finished with value: -2131.499267578125 and parameters: {'r_scaling': 0.06825269978586347	'unroll': 6	'update_epoch': 12	'discount': 0.985533881629145	'lr': 0.00029336551769923837	'entropy': 0.003251571328084018}. Best is trial 109 with value: -7809.38330078125. [0m
[32m[I 2021-12-11 08:48:57	197] [0m Trial 133 finished with value: -7389.58544921875 and parameters: {'r_scaling': 0.08159640940385263	'unroll': 5	'update_epoch': 11	'discount': 0.9813929713645321	'lr': 0.000256161932529731	'entropy': 0.004043537262553339}. Best is trial 109 with value: -7809.38330078125. [0m
[32m[I 2021-12-11 08:52:34	480] [0m Trial 134 finished with value: -2453.646728515625 and parameters: {'r_scaling': 0.0814831757317137	'unroll': 5	'update_epoch': 10	'discount': 0.9764424490450536	'lr': 0.0002448329742152561	'entropy': 0.003978915335499943}. Best is trial 109 with value: -7809.38330078125. [0m
[32m[I 2021-12-11 08:56:43	295] [0m Trial 135 finished with value: -4555.24755859375 and parameters: {'r_scaling': 0.059133343962502014	'unroll': 4	'update_epoch': 11	'discount': 0.9817346449359018	'lr': 0.000260271955023743	'entropy': 0.00463900786205241}. Best is trial 109 with value: -7809.38330078125. [0m
[32m[I 2021-12-11 09:01:28	857] [0m Trial 136 finished with value: -1226.8892822265625 and parameters: {'r_scaling': 0.09204827102998336	'unroll': 5	'update_epoch': 12	'discount': 0.9271435816390579	'lr': 0.0002823735161815245	'entropy': 0.005570637287289986}. Best is trial 109 with value: -7809.38330078125. [0m
[32m[I 2021-12-11 09:05:40	396] [0m Trial 137 finished with value: -1974.55517578125 and parameters: {'r_scaling': 0.051472139316730364	'unroll': 6	'update_epoch': 11	'discount': 0.980743987982295	'lr': 0.0003180018150933547	'entropy': 0.00860723926525311}. Best is trial 109 with value: -7809.38330078125. [0m
[32m[I 2021-12-11 09:09:59	898] [0m Trial 138 finished with value: -6093.5419921875 and parameters: {'r_scaling': 0.06879660323727686	'unroll': 5	'update_epoch': 10	'discount': 0.9779055099707633	'lr': 0.0002567806118365746	'entropy': 0.0028103295978959553}. Best is trial 109 with value: -7809.38330078125. [0m
[32m[I 2021-12-11 09:14:13	022] [0m Trial 139 finished with value: -4924.1474609375 and parameters: {'r_scaling': 0.13399540790065206	'unroll': 4	'update_epoch': 12	'discount': 0.9876659438364966	'lr': 0.0003405545145325066	'entropy': 0.006638160354864698}. Best is trial 109 with value: -7809.38330078125. [0m
[32m[I 2021-12-11 09:18:22	428] [0m Trial 140 finished with value: -718.6410522460938 and parameters: {'r_scaling': 13.701349951057274	'unroll': 6	'update_epoch': 10	'discount': 0.9848809665301429	'lr': 0.00022988530491505158	'entropy': 0.004107122131577475}. Best is trial 109 with value: -7809.38330078125. [0m
[32m[I 2021-12-11 09:22:05	627] [0m Trial 141 finished with value: -5867.873046875 and parameters: {'r_scaling': 0.10847298415373205	'unroll': 5	'update_epoch': 11	'discount': 0.9909659293696812	'lr': 0.0003719197872471551	'entropy': 0.006481832564931136}. Best is trial 109 with value: -7809.38330078125. [0m
[32m[I 2021-12-11 09:26:31	786] [0m Trial 142 finished with value: -6213.51708984375 and parameters: {'r_scaling': 0.07881039535822015	'unroll': 5	'update_epoch': 11	'discount': 0.9949250714974787	'lr': 0.00029001982074026647	'entropy': 0.003446129269544953}. Best is trial 109 with value: -7809.38330078125. [0m
[32m[I 2021-12-11 09:30:13	097] [0m Trial 143 finished with value: -5895.71923828125 and parameters: {'r_scaling': 0.08347097174212703	'unroll': 5	'update_epoch': 11	'discount': 0.9941221688834612	'lr': 0.0002983458712938983	'entropy': 0.0032902713045365383}. Best is trial 109 with value: -7809.38330078125. [0m
[32m[I 2021-12-11 09:34:44	691] [0m Trial 144 finished with value: -5650.9443359375 and parameters: {'r_scaling': 0.0689042099705205	'unroll': 5	'update_epoch': 12	'discount': 0.9948200648567971	'lr': 0.0002837754779996398	'entropy': 0.005029758965738184}. Best is trial 109 with value: -7809.38330078125. [0m
[32m[I 2021-12-11 09:39:20	007] [0m Trial 145 finished with value: -5864.3388671875 and parameters: {'r_scaling': 0.057033052015205796	'unroll': 4	'update_epoch': 11	'discount': 0.9889536351036045	'lr': 0.0002726285399031766	'entropy': 0.0035494872884413095}. Best is trial 109 with value: -7809.38330078125. [0m
[32m[I 2021-12-11 09:43:16	835] [0m Trial 146 finished with value: -6331.47265625 and parameters: {'r_scaling': 0.09650936385267081	'unroll': 5	'update_epoch': 14	'discount': 0.9917311302683086	'lr': 0.00032095987386217815	'entropy': 0.005592661543616392}. Best is trial 109 with value: -7809.38330078125. [0m
[32m[I 2021-12-11 09:47:45	742] [0m Trial 147 finished with value: -2044.0433349609375 and parameters: {'r_scaling': 0.17025441607705966	'unroll': 6	'update_epoch': 14	'discount': 0.9829011918726744	'lr': 0.0003171796317271655	'entropy': 0.004164662993562877}. Best is trial 109 with value: -7809.38330078125. [0m
[32m[I 2021-12-11 09:51:42	981] [0m Trial 148 finished with value: -4961.41943359375 and parameters: {'r_scaling': 0.09695167956974644	'unroll': 5	'update_epoch': 14	'discount': 0.9906681079670253	'lr': 0.0003434316215974785	'entropy': 0.005677696860432775}. Best is trial 109 with value: -7809.38330078125. [0m
[32m[I 2021-12-11 09:56:31	796] [0m Trial 149 finished with value: -6358.91845703125 and parameters: {'r_scaling': 0.11675355297859699	'unroll': 5	'update_epoch': 15	'discount': 0.987179110384045	'lr': 0.0003004117548837783	'entropy': 0.0027725678290828736}. Best is trial 109 with value: -7809.38330078125. [0m
[32m[I 2021-12-11 10:01:02	700] [0m Trial 150 finished with value: -2082.865234375 and parameters: {'r_scaling': 0.12286626675162055	'unroll': 6	'update_epoch': 15	'discount': 0.9843617772138497	'lr': 0.0004173444338879981	'entropy': 0.0019715013976715347}. Best is trial 109 with value: -7809.38330078125. [0m
[32m[I 2021-12-11 10:05:03	625] [0m Trial 151 finished with value: -6167.34765625 and parameters: {'r_scaling': 0.14512786333196648	'unroll': 5	'update_epoch': 15	'discount': 0.9884484748473247	'lr': 0.00030345163060655416	'entropy': 0.0024442494768544248}. Best is trial 109 with value: -7809.38330078125. [0m
[32m[I 2021-12-11 10:09:42	161] [0m Trial 152 finished with value: -3451.0625 and parameters: {'r_scaling': 0.07778962780213385	'unroll': 5	'update_epoch': 14	'discount': 0.9866836379299528	'lr': 0.00032703514567568364	'entropy': 0.002801976954113158}. Best is trial 109 with value: -7809.38330078125. [0m
[32m[I 2021-12-11 10:13:43	975] [0m Trial 153 finished with value: -2023.1756591796875 and parameters: {'r_scaling': 0.11254214996786825	'unroll': 5	'update_epoch': 15	'discount': 0.9574446590632697	'lr': 0.00024960079830451857	'entropy': 0.0015551054600090985}. Best is trial 109 with value: -7809.38330078125. [0m
[32m[I 2021-12-11 10:18:28	934] [0m Trial 154 finished with value: -1784.004150390625 and parameters: {'r_scaling': 0.19957883513615818	'unroll': 4	'update_epoch': 13	'discount': 0.9920202740556205	'lr': 0.000358237444392611	'entropy': 0.004410390747927996}. Best is trial 109 with value: -7809.38330078125. [0m
[32m[I 2021-12-11 10:23:08	171] [0m Trial 155 finished with value: -2183.262939453125 and parameters: {'r_scaling': 0.09298395805167403	'unroll': 5	'update_epoch': 14	'discount': 0.9644396755355621	'lr': 0.0002970676848206601	'entropy': 0.003539644644416674}. Best is trial 109 with value: -7809.38330078125. [0m
[32m[I 2021-12-11 10:27:30	621] [0m Trial 156 finished with value: -3758.388427734375 and parameters: {'r_scaling': 0.07901760264329587	'unroll': 4	'update_epoch': 13	'discount': 0.9896212755846341	'lr': 0.00032802423374409873	'entropy': 0.005062899921529342}. Best is trial 109 with value: -7809.38330078125. [0m
[32m[I 2021-12-11 10:31:57	906] [0m Trial 157 finished with value: -2161.19677734375 and parameters: {'r_scaling': 0.11672071094453278	'unroll': 6	'update_epoch': 15	'discount': 0.9794959245803612	'lr': 0.0003796489701797616	'entropy': 0.0029803673019803533}. Best is trial 109 with value: -7809.38330078125. [0m
[32m[I 2021-12-11 10:36:32	060] [0m Trial 158 finished with value: -6399.44873046875 and parameters: {'r_scaling': 0.06802584302190547	'unroll': 5	'update_epoch': 12	'discount': 0.9862894209015964	'lr': 0.0002699112877740868	'entropy': 0.003933263645867755}. Best is trial 109 with value: -7809.38330078125. [0m
[32m[I 2021-12-11 10:40:21	564] [0m Trial 159 finished with value: -7423.56591796875 and parameters: {'r_scaling': 0.09444153119177531	'unroll': 5	'update_epoch': 12	'discount': 0.9817704143224449	'lr': 0.0002739982677560081	'entropy': 0.006940203810505585}. Best is trial 109 with value: -7809.38330078125. [0m
[32m[I 2021-12-11 10:44:43	371] [0m Trial 160 finished with value: -1647.60302734375 and parameters: {'r_scaling': 0.1457629244304406	'unroll': 6	'update_epoch': 13	'discount': 0.9819939528490476	'lr': 0.000268150323411473	'entropy': 0.007619092356278844}. Best is trial 109 with value: -7809.38330078125. [0m
[32m[I 2021-12-11 10:48:46	143] [0m Trial 161 finished with value: -751.2899780273438 and parameters: {'r_scaling': 0.09814256476511983	'unroll': 10	'update_epoch': 12	'discount': 0.9858533124959885	'lr': 0.00028210140043441494	'entropy': 0.005851315022913921}. Best is trial 109 with value: -7809.38330078125. [0m
[32m[I 2021-12-11 10:52:34	100] [0m Trial 162 finished with value: -6572.1640625 and parameters: {'r_scaling': 0.06489288078542954	'unroll': 5	'update_epoch': 12	'discount': 0.982607921452613	'lr': 0.00024530389250526294	'entropy': 0.00708829321877211}. Best is trial 109 with value: -7809.38330078125. [0m
[32m[I 2021-12-11 10:57:21	978] [0m Trial 163 finished with value: -6253.1494140625 and parameters: {'r_scaling': 0.06325137712595066	'unroll': 5	'update_epoch': 12	'discount': 0.9744271829784812	'lr': 0.00024105834977394632	'entropy': 0.007568934094389325}. Best is trial 109 with value: -7809.38330078125. [0m
[32m[I 2021-12-11 11:01:44	873] [0m Trial 164 finished with value: -5519.10400390625 and parameters: {'r_scaling': 0.09271515270551946	'unroll': 4	'update_epoch': 12	'discount': 0.9790541742506529	'lr': 0.0002452849397465171	'entropy': 0.006875673878346006}. Best is trial 109 with value: -7809.38330078125. [0m
[32m[I 2021-12-11 11:05:37	049] [0m Trial 165 finished with value: -7819.85888671875 and parameters: {'r_scaling': 0.06486825636798736	'unroll': 5	'update_epoch': 13	'discount': 0.9838751987382887	'lr': 0.00026299826627245056	'entropy': 0.004728757827738526}. Best is trial 165 with value: -7819.85888671875. [0m
[32m[I 2021-12-11 11:10:18	161] [0m Trial 166 finished with value: -6267.93408203125 and parameters: {'r_scaling': 0.06345815375487783	'unroll': 5	'update_epoch': 13	'discount': 0.9809882676677963	'lr': 0.00022041039234712632	'entropy': 0.004739105528666495}. Best is trial 165 with value: -7819.85888671875. [0m
[32m[I 2021-12-11 11:14:11	849] [0m Trial 167 finished with value: -6632.62939453125 and parameters: {'r_scaling': 0.06734137506117291	'unroll': 5	'update_epoch': 13	'discount': 0.9836217645392005	'lr': 0.0002589132947041234	'entropy': 0.0055159158942733825}. Best is trial 165 with value: -7819.85888671875. [0m
[32m[I 2021-12-11 11:17:50	285] [0m Trial 168 finished with value: -5273.21826171875 and parameters: {'r_scaling': 0.05908507748072247	'unroll': 6	'update_epoch': 13	'discount': 0.9835004626968814	'lr': 0.00025574806132717704	'entropy': 0.010556754729446505}. Best is trial 165 with value: -7819.85888671875. [0m
[32m[I 2021-12-11 11:22:10	743] [0m Trial 169 finished with value: -4445.4443359375 and parameters: {'r_scaling': 0.06968264181737213	'unroll': 4	'update_epoch': 12	'discount': 0.9777370865765742	'lr': 0.00018758529405921924	'entropy': 0.006305946508521809}. Best is trial 165 with value: -7819.85888671875. [0m
[32m[I 2021-12-11 11:26:12	178] [0m Trial 170 finished with value: -896.6641235351562 and parameters: {'r_scaling': 0.07978456504261783	'unroll': 3	'update_epoch': 3	'discount': 0.9842327363107175	'lr': 0.00022753280301555983	'entropy': 0.004563887684640313}. Best is trial 165 with value: -7819.85888671875. [0m
[32m[I 2021-12-11 11:30:56	476] [0m Trial 171 finished with value: -7150.20458984375 and parameters: {'r_scaling': 0.08580859205845734	'unroll': 5	'update_epoch': 13	'discount': 0.9819698535397313	'lr': 0.00026764303684937503	'entropy': 0.0054579159208527385}. Best is trial 165 with value: -7819.85888671875. [0m
[32m[I 2021-12-11 11:35:36	547] [0m Trial 172 finished with value: -5624.55224609375 and parameters: {'r_scaling': 0.05572206150050993	'unroll': 5	'update_epoch': 13	'discount': 0.9821465657400832	'lr': 0.0002631016884054449	'entropy': 0.004200774453068698}. Best is trial 165 with value: -7819.85888671875. [0m
[32m[I 2021-12-11 11:40:32	883] [0m Trial 173 finished with value: -5362.40966796875 and parameters: {'r_scaling': 0.08421285410600461	'unroll': 5	'update_epoch': 13	'discount': 0.9808328176262402	'lr': 0.0002360067330136914	'entropy': 0.005058080535289668}. Best is trial 165 with value: -7819.85888671875. [0m
[32m[I 2021-12-11 11:44:54	284] [0m Trial 174 finished with value: -5918.42578125 and parameters: {'r_scaling': 0.06569112162342451	'unroll': 4	'update_epoch': 12	'discount': 0.9853358738551021	'lr': 0.0002603382321915561	'entropy': 0.006998165443951139}. Best is trial 165 with value: -7819.85888671875. [0m
[32m[I 2021-12-11 11:49:24	218] [0m Trial 175 finished with value: -3053.493896484375 and parameters: {'r_scaling': 0.05072190961360916	'unroll': 5	'update_epoch': 13	'discount': 0.9831126322783063	'lr': 0.0003056995604889747	'entropy': 0.009078400399472596}. Best is trial 165 with value: -7819.85888671875. [0m
[32m[I 2021-12-11 11:53:48	968] [0m Trial 176 finished with value: -2023.527587890625 and parameters: {'r_scaling': 0.11895798119466934	'unroll': 6	'update_epoch': 12	'discount': 0.9800071984414471	'lr': 0.0002788673197459599	'entropy': 0.005971466420869601}. Best is trial 165 with value: -7819.85888671875. [0m
[32m[I 2021-12-11 11:58:30	336] [0m Trial 177 finished with value: -6061.71533203125 and parameters: {'r_scaling': 0.07404366022547876	'unroll': 5	'update_epoch': 13	'discount': 0.9874017372785366	'lr': 0.0002486484193555455	'entropy': 0.0040279345927437035}. Best is trial 165 with value: -7819.85888671875. [0m
[32m[I 2021-12-11 12:03:04	850] [0m Trial 178 finished with value: -2796.057861328125 and parameters: {'r_scaling': 0.08856685040850741	'unroll': 5	'update_epoch': 12	'discount': 0.9760196971711271	'lr': 0.0002732732784441812	'entropy': 0.005381855255513344}. Best is trial 165 with value: -7819.85888671875. [0m
[32m[I 2021-12-11 12:06:30	100] [0m Trial 179 finished with value: -5298.49169921875 and parameters: {'r_scaling': 0.06537664484741744	'unroll': 6	'update_epoch': 12	'discount': 0.9847761201554693	'lr': 0.0002927355321869278	'entropy': 0.008141408906096643}. Best is trial 165 with value: -7819.85888671875. [0m
[32m[I 2021-12-11 12:11:10	449] [0m Trial 180 finished with value: -2038.3782958984375 and parameters: {'r_scaling': 0.11018074091330485	'unroll': 5	'update_epoch': 14	'discount': 0.9791336260039324	'lr': 0.0002112622467466404	'entropy': 0.004684173152423363}. Best is trial 165 with value: -7819.85888671875. [0m
[32m[I 2021-12-11 12:15:50	011] [0m Trial 181 finished with value: -6804.1455078125 and parameters: {'r_scaling': 0.08676652893480061	'unroll': 5	'update_epoch': 14	'discount': 0.9874411118243899	'lr': 0.00031435759494823247	'entropy': 0.005345669510340621}. Best is trial 165 with value: -7819.85888671875. [0m
[32m[I 2021-12-11 12:19:42	786] [0m Trial 182 finished with value: -5437.1552734375 and parameters: {'r_scaling': 0.08341983855579262	'unroll': 5	'update_epoch': 13	'discount': 0.986687883917137	'lr': 0.0003115986223600066	'entropy': 0.006527148926242549}. Best is trial 165 with value: -7819.85888671875. [0m
[32m[I 2021-12-11 12:24:33	471] [0m Trial 183 finished with value: -2841.465576171875 and parameters: {'r_scaling': 0.07238502962326088	'unroll': 4	'update_epoch': 14	'discount': 0.9826891918412847	'lr': 0.00033781044033259864	'entropy': 0.0038819186682485817}. Best is trial 165 with value: -7819.85888671875. [0m
[32m[I 2021-12-11 12:28:31	507] [0m Trial 184 finished with value: -496.9916076660156 and parameters: {'r_scaling': 0.09760644742909788	'unroll': 5	'update_epoch': 14	'discount': 0.9853474756090086	'lr': 0.0015134615389704954	'entropy': 0.005320457714102751}. Best is trial 165 with value: -7819.85888671875. [0m
[32m[I 2021-12-11 12:33:14	655] [0m Trial 185 finished with value: -6000.01513671875 and parameters: {'r_scaling': 0.13082254247180122	'unroll': 5	'update_epoch': 13	'discount': 0.9892153226348452	'lr': 0.00026322437868604563	'entropy': 0.0031575272459319873}. Best is trial 165 with value: -7819.85888671875. [0m
[32m[I 2021-12-11 12:37:52	983] [0m Trial 186 finished with value: -5678.23974609375 and parameters: {'r_scaling': 0.05848194887434819	'unroll': 5	'update_epoch': 12	'discount': 0.9821495158946691	'lr': 0.00029163563989900005	'entropy': 0.006044527539239123}. Best is trial 165 with value: -7819.85888671875. [0m
[32m[I 2021-12-11 12:41:33	668] [0m Trial 187 finished with value: -1659.3160400390625 and parameters: {'r_scaling': 0.0805549780979303	'unroll': 4	'update_epoch': 13	'discount': 0.9489846755040181	'lr': 0.00031345545706600714	'entropy': 0.004425074583012956}. Best is trial 165 with value: -7819.85888671875. [0m
[32m[I 2021-12-11 12:46:00	683] [0m Trial 188 finished with value: -2318.0888671875 and parameters: {'r_scaling': 0.10105219003631374	'unroll': 6	'update_epoch': 14	'discount': 0.9876319234003752	'lr': 0.0003525169991565638	'entropy': 0.007105883899008904}. Best is trial 165 with value: -7819.85888671875. [0m
[32m[I 2021-12-11 12:50:07	093] [0m Trial 189 finished with value: -1102.1082763671875 and parameters: {'r_scaling': 0.07216191905369952	'unroll': 11	'update_epoch': 12	'discount': 0.9837577591064952	'lr': 0.0002836205291289874	'entropy': 0.004884847067765301}. Best is trial 165 with value: -7819.85888671875. [0m
[32m[I 2021-12-11 12:54:54	956] [0m Trial 190 finished with value: -855.6478881835938 and parameters: {'r_scaling': 42.063620852036024	'unroll': 5	'update_epoch': 15	'discount': 0.9863172671506508	'lr': 0.00024164962941677394	'entropy': 0.0038569115178832573}. Best is trial 165 with value: -7819.85888671875. [0m
[32m[I 2021-12-11 12:59:36	551] [0m Trial 191 finished with value: -5103.7236328125 and parameters: {'r_scaling': 0.09461875074163421	'unroll': 5	'update_epoch': 14	'discount': 0.989942995360147	'lr': 0.00032658129193205594	'entropy': 0.0056986292311741295}. Best is trial 165 with value: -7819.85888671875. [0m
[32m[I 2021-12-11 13:04:40	356] [0m Trial 192 finished with value: -5801.6669921875 and parameters: {'r_scaling': 0.08824002987076306	'unroll': 5	'update_epoch': 15	'discount': 0.9882592932018632	'lr': 0.0003119645909546308	'entropy': 0.005485353433215361}. Best is trial 165 with value: -7819.85888671875. [0m
[32m[I 2021-12-11 13:09:18	920] [0m Trial 193 finished with value: -5989.169921875 and parameters: {'r_scaling': 0.1125705762467782	'unroll': 5	'update_epoch': 13	'discount': 0.9849340959213164	'lr': 0.00027128256946859426	'entropy': 0.0001200258114573173}. Best is trial 165 with value: -7819.85888671875. [0m
[32m[I 2021-12-11 13:14:02	639] [0m Trial 194 finished with value: -6477.02783203125 and parameters: {'r_scaling': 0.06575979507906353	'unroll': 5	'update_epoch': 14	'discount': 0.9811530553054273	'lr': 0.00030095296133828713	'entropy': 0.0064380505813879645}. Best is trial 165 with value: -7819.85888671875. [0m
[32m[I 2021-12-11 13:18:35	782] [0m Trial 195 finished with value: -6118.9384765625 and parameters: {'r_scaling': 0.06079165176743822	'unroll': 5	'update_epoch': 12	'discount': 0.9809586750197323	'lr': 0.000256107269058067	'entropy': 0.008095904552094102}. Best is trial 165 with value: -7819.85888671875. [0m
[32m[I 2021-12-11 13:23:05	703] [0m Trial 196 finished with value: -5606.58837890625 and parameters: {'r_scaling': 0.06683519481626445	'unroll': 5	'update_epoch': 11	'discount': 0.9831758581441858	'lr': 0.0002925580473871788	'entropy': 0.009401191736871888}. Best is trial 165 with value: -7819.85888671875. [0m
[32m[I 2021-12-11 13:27:30	422] [0m Trial 197 finished with value: -5173.24267578125 and parameters: {'r_scaling': 0.07720823676279971	'unroll': 4	'update_epoch': 13	'discount': 0.979516914878247	'lr': 0.00030470862621159055	'entropy': 0.006575055979075696}. Best is trial 165 with value: -7819.85888671875. [0m
[32m[I 2021-12-11 13:31:53	467] [0m Trial 198 finished with value: -5608.22802734375 and parameters: {'r_scaling': 0.05361700883780242	'unroll': 6	'update_epoch': 14	'discount': 0.9783093045642534	'lr': 0.00033942950329889614	'entropy': 0.004828430396261124}. Best is trial 165 with value: -7819.85888671875. [0m
[32m[I 2021-12-11 13:36:24	206] [0m Trial 199 finished with value: -6518.64990234375 and parameters: {'r_scaling': 0.0654417264786109	'unroll': 5	'update_epoch': 12	'discount': 0.9813908925697934	'lr': 0.0002678811320087852	'entropy': 0.003444318682621498}. Best is trial 165 with value: -7819.85888671875. [0m
