# Supplementary material
Source: ML conference proceedings conference paper supplement (https://proceedings.neurips.cc/paper_files/paper/2022/hash/10a6bdcabbd5a3d36b760daa295f63c1-Abstract.html)
Supplement: Supplementary file 1 [file 10a6bdcabbd5a3d36b760daa295f63c1-Supplemental-Conference.zip › neurips2022/code/robotics_code/hp_searches/humanoid_20M.log]

[32m[I 2021-12-11 20:25:44	870] [0m A new study created in memory with name: no-name-ef6a5c81-ba9c-42fd-bc19-1b7379d9cf0f [0m
[32m[I 2021-12-11 20:29:37	351] [0m Trial 0 finished with value: -1579.5811767578125 and parameters: {'r_scaling': 78.45862072175406	'unroll': 9	'update_epoch': 8	'discount': 0.985718244991362	'lr': 0.00011970130005600992	'entropy': 0.00013276278446099117}. Best is trial 0 with value: -1579.5811767578125. [0m
[32m[I 2021-12-11 20:33:35	722] [0m Trial 1 finished with value: -305.0114440917969 and parameters: {'r_scaling': 41.27032973186199	'unroll': 4	'update_epoch': 6	'discount': 0.9312050859982438	'lr': 0.0016872971006332632	'entropy': 0.0001558172600154209}. Best is trial 0 with value: -1579.5811767578125. [0m
[32m[I 2021-12-11 20:37:54	510] [0m Trial 2 finished with value: -324.7357177734375 and parameters: {'r_scaling': 5.065998995775246	'unroll': 7	'update_epoch': 8	'discount': 0.9863775178706286	'lr': 0.0010341828703244215	'entropy': 0.014317146466213718}. Best is trial 0 with value: -1579.5811767578125. [0m
[32m[I 2021-12-11 20:42:22	294] [0m Trial 3 finished with value: -303.38604736328125 and parameters: {'r_scaling': 10.919068361562017	'unroll': 5	'update_epoch': 7	'discount': 0.9899929807456579	'lr': 0.0007151837717181552	'entropy': 0.0047075210659542465}. Best is trial 0 with value: -1579.5811767578125. [0m
[32m[I 2021-12-11 20:46:01	702] [0m Trial 4 finished with value: -300.5123596191406 and parameters: {'r_scaling': 33.40683262478403	'unroll': 12	'update_epoch': 5	'discount': 0.9159072796549553	'lr': 0.0017338893734057611	'entropy': 0.00014630949257001192}. Best is trial 0 with value: -1579.5811767578125. [0m
[32m[I 2021-12-11 20:51:07	649] [0m Trial 5 finished with value: -2456.6025390625 and parameters: {'r_scaling': 0.7114486233284301	'unroll': 6	'update_epoch': 12	'discount': 0.964700421507434	'lr': 0.00014182372602932196	'entropy': 0.014268325680868837}. Best is trial 5 with value: -2456.6025390625. [0m
[32m[I 2021-12-11 20:54:49	269] [0m Trial 6 finished with value: -381.2957458496094 and parameters: {'r_scaling': 112.96629248705645	'unroll': 15	'update_epoch': 3	'discount': 0.9052602935931202	'lr': 0.0007975429693948078	'entropy': 0.001461865125670658}. Best is trial 5 with value: -2456.6025390625. [0m
[32m[I 2021-12-11 20:58:30	965] [0m Trial 7 finished with value: -880.61376953125 and parameters: {'r_scaling': 0.2521224633240612	'unroll': 14	'update_epoch': 3	'discount': 0.9386345547681237	'lr': 0.00043559870659002373	'entropy': 0.0003392180220786759}. Best is trial 5 with value: -2456.6025390625. [0m
[32m[I 2021-12-11 21:03:18	041] [0m Trial 8 finished with value: -286.5542297363281 and parameters: {'r_scaling': 82.79290632536944	'unroll': 14	'update_epoch': 13	'discount': 0.9021466703858699	'lr': 0.0016464366882116975	'entropy': 0.03478763370501935}. Best is trial 5 with value: -2456.6025390625. [0m
[32m[I 2021-12-11 21:08:16	776] [0m Trial 9 finished with value: -674.368408203125 and parameters: {'r_scaling': 3.0269470661821436	'unroll': 13	'update_epoch': 15	'discount': 0.9002455708255713	'lr': 0.0002419616005497079	'entropy': 0.0929831565804301}. Best is trial 5 with value: -2456.6025390625. [0m
[32m[I 2021-12-11 21:14:32	113] [0m Trial 10 finished with value: -1475.02392578125 and parameters: {'r_scaling': 0.05155087142977289	'unroll': 1	'update_epoch': 11	'discount': 0.9626063428728494	'lr': 0.0001107547192132914	'entropy': 0.002981651808772809}. Best is trial 5 with value: -2456.6025390625. [0m
[32m[I 2021-12-11 21:19:23	867] [0m Trial 11 finished with value: -1511.5439453125 and parameters: {'r_scaling': 0.8411613058270764	'unroll': 10	'update_epoch': 11	'discount': 0.9650568071801461	'lr': 0.00010467452481748111	'entropy': 0.010432285376168152}. Best is trial 5 with value: -2456.6025390625. [0m
[32m[I 2021-12-11 21:23:49	705] [0m Trial 12 finished with value: -1156.5753173828125 and parameters: {'r_scaling': 1.0083193605622423	'unroll': 9	'update_epoch': 10	'discount': 0.9702845140580877	'lr': 0.0001895986769961123	'entropy': 0.0007697337067992925}. Best is trial 5 with value: -2456.6025390625. [0m
[32m[I 2021-12-11 21:28:25	826] [0m Trial 13 finished with value: -5654.12548828125 and parameters: {'r_scaling': 0.24621947084771756	'unroll': 7	'update_epoch': 9	'discount': 0.97765721782454	'lr': 0.00018548201048576828	'entropy': 0.017179364937843587}. Best is trial 13 with value: -5654.12548828125. [0m
[32m[I 2021-12-11 21:33:46	001] [0m Trial 14 finished with value: -938.225341796875 and parameters: {'r_scaling': 0.12743352635105645	'unroll': 6	'update_epoch': 14	'discount': 0.9534563776497614	'lr': 0.00023873731353199267	'entropy': 0.02781917178769057}. Best is trial 13 with value: -5654.12548828125. [0m
[32m[I 2021-12-11 21:39:33	140] [0m Trial 15 finished with value: -915.8173828125 and parameters: {'r_scaling': 0.5196340382424711	'unroll': 1	'update_epoch': 10	'discount': 0.9719775505951918	'lr': 0.0003725241055625719	'entropy': 0.0980688929347065}. Best is trial 13 with value: -5654.12548828125. [0m
[32m[I 2021-12-11 21:44:31	369] [0m Trial 16 finished with value: -1287.671142578125 and parameters: {'r_scaling': 1.92043209184471	'unroll': 4	'update_epoch': 12	'discount': 0.9501752003979763	'lr': 0.00016310000229331398	'entropy': 0.007267271934236137}. Best is trial 13 with value: -5654.12548828125. [0m
[32m[I 2021-12-11 21:48:34	985] [0m Trial 17 finished with value: -3736.56787109375 and parameters: {'r_scaling': 0.2155460300139073	'unroll': 11	'update_epoch': 9	'discount': 0.9775009806756861	'lr': 0.00026844797554617536	'entropy': 0.02834233513968329}. Best is trial 13 with value: -5654.12548828125. [0m
[32m[I 2021-12-11 21:52:36	049] [0m Trial 18 finished with value: -1310.976318359375 and parameters: {'r_scaling': 0.05551028179273514	'unroll': 11	'update_epoch': 9	'discount': 0.977929279452973	'lr': 0.0002940909261375268	'entropy': 0.045198851977052534}. Best is trial 13 with value: -5654.12548828125. [0m
[32m[I 2021-12-11 21:56:01	559] [0m Trial 19 finished with value: -517.107666015625 and parameters: {'r_scaling': 0.30726394322575196	'unroll': 8	'update_epoch': 1	'discount': 0.99357183557056	'lr': 0.0006142931228965781	'entropy': 0.025015587405098873}. Best is trial 13 with value: -5654.12548828125. [0m
[32m[I 2021-12-11 21:59:56	920] [0m Trial 20 finished with value: -2514.1728515625 and parameters: {'r_scaling': 0.14266074899219836	'unroll': 10	'update_epoch': 5	'discount': 0.9782638968517604	'lr': 0.000268549640907459	'entropy': 0.0025862076925210757}. Best is trial 13 with value: -5654.12548828125. [0m
[32m[I 2021-12-11 22:03:33	019] [0m Trial 21 finished with value: -979.6923828125 and parameters: {'r_scaling': 0.12238717559344704	'unroll': 11	'update_epoch': 5	'discount': 0.9770172525282081	'lr': 0.00031786703187138335	'entropy': 0.002456640235068807}. Best is trial 13 with value: -5654.12548828125. [0m
[32m[I 2021-12-11 22:07:32	797] [0m Trial 22 finished with value: -1156.5498046875 and parameters: {'r_scaling': 0.17181703096114936	'unroll': 8	'update_epoch': 7	'discount': 0.957200456792847	'lr': 0.0002137336001730792	'entropy': 0.0011902902182766885}. Best is trial 13 with value: -5654.12548828125. [0m
[32m[I 2021-12-11 22:11:25	962] [0m Trial 23 finished with value: -772.00537109375 and parameters: {'r_scaling': 0.36825995735710765	'unroll': 10	'update_epoch': 4	'discount': 0.9786970808242303	'lr': 0.000500837947081279	'entropy': 0.005548541682331663}. Best is trial 13 with value: -5654.12548828125. [0m
[32m[I 2021-12-11 22:15:30	817] [0m Trial 24 finished with value: -578.7958374023438 and parameters: {'r_scaling': 0.09075092935896273	'unroll': 12	'update_epoch': 9	'discount': 0.9452226415083266	'lr': 0.00030000265244932764	'entropy': 0.057388514557971004}. Best is trial 13 with value: -5654.12548828125. [0m
[32m[I 2021-12-11 22:19:37	466] [0m Trial 25 finished with value: -712.68896484375 and parameters: {'r_scaling': 1.4705960372296853	'unroll': 9	'update_epoch': 7	'discount': 0.9816291290184049	'lr': 0.00014455841953851616	'entropy': 0.020055130630258395}. Best is trial 13 with value: -5654.12548828125. [0m
[32m[I 2021-12-11 22:23:20	415] [0m Trial 26 finished with value: -832.4317016601562 and parameters: {'r_scaling': 0.19636747066589114	'unroll': 7	'update_epoch': 1	'discount': 0.9692632883584024	'lr': 0.00019277115281527468	'entropy': 0.0077955007435200445}. Best is trial 13 with value: -5654.12548828125. [0m
[32m[I 2021-12-11 22:27:13	020] [0m Trial 27 finished with value: -636.8413696289062 and parameters: {'r_scaling': 0.38134789151893933	'unroll': 11	'update_epoch': 6	'discount': 0.9936196971074529	'lr': 0.00048458027335683866	'entropy': 0.0017432264632452597}. Best is trial 13 with value: -5654.12548828125. [0m
[32m[I 2021-12-11 22:31:41	340] [0m Trial 28 finished with value: -1739.3177490234375 and parameters: {'r_scaling': 0.08861983017507113	'unroll': 10	'update_epoch': 9	'discount': 0.957795629425498	'lr': 0.00026084679968218453	'entropy': 0.0008135341497473033}. Best is trial 13 with value: -5654.12548828125. [0m
[32m[I 2021-12-11 22:35:46	358] [0m Trial 29 finished with value: -793.6346435546875 and parameters: {'r_scaling': 5.89467704428008	'unroll': 12	'update_epoch': 8	'discount': 0.9841178472609322	'lr': 0.00035506009886721187	'entropy': 0.0038971567214234814}. Best is trial 13 with value: -5654.12548828125. [0m
[32m[I 2021-12-11 22:39:45	654] [0m Trial 30 finished with value: -835.6014404296875 and parameters: {'r_scaling': 0.49815036798188245	'unroll': 7	'update_epoch': 4	'discount': 0.9288208894622111	'lr': 0.0001658244740168893	'entropy': 0.014097333566802962}. Best is trial 13 with value: -5654.12548828125. [0m
[32m[I 2021-12-11 22:44:37	122] [0m Trial 31 finished with value: -3306.4501953125 and parameters: {'r_scaling': 0.7395451667694297	'unroll': 5	'update_epoch': 12	'discount': 0.9740340279521409	'lr': 0.00014697007229841388	'entropy': 0.016051788018073478}. Best is trial 13 with value: -5654.12548828125. [0m
[32m[I 2021-12-11 22:49:27	533] [0m Trial 32 finished with value: -2022.7392578125 and parameters: {'r_scaling': 0.22075035536150328	'unroll': 3	'update_epoch': 10	'discount': 0.9735116659783175	'lr': 0.00013648667999780777	'entropy': 0.049571909406842946}. Best is trial 13 with value: -5654.12548828125. [0m
[32m[I 2021-12-11 22:55:19	391] [0m Trial 33 finished with value: -1242.371337890625 and parameters: {'r_scaling': 1.2194289263540725	'unroll': 3	'update_epoch': 13	'discount': 0.9881245772566415	'lr': 0.00019181015991966184	'entropy': 0.018999370358620527}. Best is trial 13 with value: -5654.12548828125. [0m
[32m[I 2021-12-11 22:59:59	857] [0m Trial 34 finished with value: -4452.58349609375 and parameters: {'r_scaling': 0.5746443641820133	'unroll': 5	'update_epoch': 11	'discount': 0.9837246092928129	'lr': 0.00012646634768454206	'entropy': 0.009827183535772431}. Best is trial 13 with value: -5654.12548828125. [0m
[32m[I 2021-12-11 23:05:02	804] [0m Trial 35 finished with value: -3148.991943359375 and parameters: {'r_scaling': 2.6156699689710736	'unroll': 5	'update_epoch': 11	'discount': 0.9862895357433108	'lr': 0.00012660729608529006	'entropy': 0.010435673559278514}. Best is trial 13 with value: -5654.12548828125. [0m
[32m[I 2021-12-11 23:10:29	646] [0m Trial 36 finished with value: -2320.918212890625 and parameters: {'r_scaling': 0.5486377025535105	'unroll': 5	'update_epoch': 12	'discount': 0.9673317546140415	'lr': 0.00011919377731095308	'entropy': 0.009911937920886101}. Best is trial 13 with value: -5654.12548828125. [0m
[32m[I 2021-12-11 23:16:02	337] [0m Trial 37 finished with value: -4220.1318359375 and parameters: {'r_scaling': 19.778705554454195	'unroll': 6	'update_epoch': 13	'discount': 0.9832437752546227	'lr': 0.00016047273130815668	'entropy': 0.017110165356272092}. Best is trial 13 with value: -5654.12548828125. [0m
[32m[I 2021-12-11 23:21:42	354] [0m Trial 38 finished with value: -5617.91650390625 and parameters: {'r_scaling': 23.58581448368559	'unroll': 6	'update_epoch': 15	'discount': 0.9873540586042203	'lr': 0.00016361207726601693	'entropy': 0.035664286282977894}. Best is trial 13 with value: -5654.12548828125. [0m
[32m[I 2021-12-11 23:27:24	032] [0m Trial 39 finished with value: -5282.77392578125 and parameters: {'r_scaling': 26.33902904484591	'unroll': 6	'update_epoch': 15	'discount': 0.9884342073284668	'lr': 0.00010049086256695164	'entropy': 0.005987168694082257}. Best is trial 13 with value: -5654.12548828125. [0m
[32m[I 2021-12-11 23:32:45	796] [0m Trial 40 finished with value: -5396.05908203125 and parameters: {'r_scaling': 49.902028038572084	'unroll': 7	'update_epoch': 15	'discount': 0.9902660986548103	'lr': 0.00010177106980994858	'entropy': 0.005420587890828258}. Best is trial 13 with value: -5654.12548828125. [0m
[32m[I 2021-12-11 23:38:26	986] [0m Trial 41 finished with value: -845.3040161132812 and parameters: {'r_scaling': 35.40219025955478	'unroll': 4	'update_epoch': 15	'discount': 0.9948650650597158	'lr': 0.00010001864260326122	'entropy': 0.005623122873513197}. Best is trial 13 with value: -5654.12548828125. [0m
[32m[I 2021-12-11 23:43:49	147] [0m Trial 42 finished with value: -5290.9677734375 and parameters: {'r_scaling': 17.23158493175121	'unroll': 7	'update_epoch': 14	'discount': 0.9892250131058223	'lr': 0.00012094803303358324	'entropy': 0.00425930803325733}. Best is trial 13 with value: -5654.12548828125. [0m
[32m[I 2021-12-11 23:49:05	170] [0m Trial 43 finished with value: -4250.544921875 and parameters: {'r_scaling': 185.9894985820354	'unroll': 7	'update_epoch': 14	'discount': 0.9896184113783836	'lr': 0.00010058420728417246	'entropy': 0.004370671215683961}. Best is trial 13 with value: -5654.12548828125. [0m
[32m[I 2021-12-11 23:54:26	844] [0m Trial 44 finished with value: -3040.913330078125 and parameters: {'r_scaling': 18.218920196468236	'unroll': 7	'update_epoch': 15	'discount': 0.9894732896087717	'lr': 0.00011768475977665056	'entropy': 0.00616092662153945}. Best is trial 13 with value: -5654.12548828125. [0m
[32m[I 2021-12-11 23:59:15	275] [0m Trial 45 finished with value: -285.6565246582031 and parameters: {'r_scaling': 53.79149072617524	'unroll': 8	'update_epoch': 14	'discount': 0.9910965056476441	'lr': 0.0013115532549584385	'entropy': 0.00368842199350057}. Best is trial 13 with value: -5654.12548828125. [0m
[32m[I 2021-12-12 00:04:47	737] [0m Trial 46 finished with value: -1324.1865234375 and parameters: {'r_scaling': 7.430120978509546	'unroll': 6	'update_epoch': 15	'discount': 0.9258531038537805	'lr': 0.00017527635923049535	'entropy': 0.07260268383143487}. Best is trial 13 with value: -5654.12548828125. [0m
[32m[I 2021-12-12 00:09:29	600] [0m Trial 47 finished with value: -2720.03857421875 and parameters: {'r_scaling': 20.911027675155214	'unroll': 8	'update_epoch': 14	'discount': 0.9867096631709881	'lr': 0.00021953790727660411	'entropy': 0.002057509048469662}. Best is trial 13 with value: -5654.12548828125. [0m
[32m[I 2021-12-12 00:14:49	761] [0m Trial 48 finished with value: -898.4964599609375 and parameters: {'r_scaling': 11.676471320930776	'unroll': 6	'update_epoch': 13	'discount': 0.9130784359892503	'lr': 0.00011415031396513064	'entropy': 0.040539946715726985}. Best is trial 13 with value: -5654.12548828125. [0m
[32m[I 2021-12-12 00:19:39	005] [0m Trial 49 finished with value: -913.0457763671875 and parameters: {'r_scaling': 56.9137100706033	'unroll': 9	'update_epoch': 14	'discount': 0.980381238556504	'lr': 0.0001350470676849235	'entropy': 0.00018151396948595523}. Best is trial 13 with value: -5654.12548828125. [0m
[32m[I 2021-12-12 00:25:48	092] [0m Trial 50 finished with value: -882.6854248046875 and parameters: {'r_scaling': 104.87080367277375	'unroll': 3	'update_epoch': 15	'discount': 0.961553429483851	'lr': 0.0001495199492746093	'entropy': 0.011768579666755562}. Best is trial 13 with value: -5654.12548828125. [0m
[32m[I 2021-12-12 00:31:02	888] [0m Trial 51 finished with value: -1276.8963623046875 and parameters: {'r_scaling': 14.37679039933539	'unroll': 6	'update_epoch': 13	'discount': 0.9856263973983075	'lr': 0.00012061893857684896	'entropy': 0.008669810052560642}. Best is trial 13 with value: -5654.12548828125. [0m
[32m[I 2021-12-12 00:36:36	756] [0m Trial 52 finished with value: -1765.9061279296875 and parameters: {'r_scaling': 27.534868620868345	'unroll': 4	'update_epoch': 15	'discount': 0.9831113669051039	'lr': 0.00011256977827601317	'entropy': 0.023455826944302854}. Best is trial 13 with value: -5654.12548828125. [0m
[32m[I 2021-12-12 00:42:09	557] [0m Trial 53 finished with value: -1791.027587890625 and parameters: {'r_scaling': 50.558076122007506	'unroll': 5	'update_epoch': 14	'discount': 0.9917335700421476	'lr': 0.00013203294088043083	'entropy': 0.006803421166980822}. Best is trial 13 with value: -5654.12548828125. [0m
[32m[I 2021-12-12 00:46:58	451] [0m Trial 54 finished with value: -319.0785217285156 and parameters: {'r_scaling': 79.22048040489167	'unroll': 7	'update_epoch': 11	'discount': 0.974447668612316	'lr': 0.0009413127649908525	'entropy': 0.012906607520204076}. Best is trial 13 with value: -5654.12548828125. [0m
[32m[I 2021-12-12 00:52:24	571] [0m Trial 55 finished with value: -5394.2978515625 and parameters: {'r_scaling': 9.21132212725182	'unroll': 6	'update_epoch': 15	'discount': 0.9886613424751675	'lr': 0.00010456809191056388	'entropy': 0.0030643647289005558}. Best is trial 13 with value: -5654.12548828125. [0m
[32m[I 2021-12-12 00:56:59	063] [0m Trial 56 finished with value: -1354.1019287109375 and parameters: {'r_scaling': 4.114237835712686	'unroll': 8	'update_epoch': 15	'discount': 0.9882411329544897	'lr': 0.00010050068922955057	'entropy': 0.0011892125755071058}. Best is trial 13 with value: -5654.12548828125. [0m
[32m[I 2021-12-12 01:02:21	888] [0m Trial 57 finished with value: -1258.4129638671875 and parameters: {'r_scaling': 29.358517441796273	'unroll': 6	'update_epoch': 14	'discount': 0.9935339613410397	'lr': 0.00015903660557213222	'entropy': 0.0031407344522476786}. Best is trial 13 with value: -5654.12548828125. [0m
[32m[I 2021-12-12 01:07:01	298] [0m Trial 58 finished with value: -1597.5316162109375 and parameters: {'r_scaling': 8.27763622033942	'unroll': 9	'update_epoch': 13	'discount': 0.9808319967594814	'lr': 0.00017627158857719854	'entropy': 0.0045342605355423275}. Best is trial 13 with value: -5654.12548828125. [0m
[32m[I 2021-12-12 01:12:27	018] [0m Trial 59 finished with value: -1814.450439453125 and parameters: {'r_scaling': 9.668685957113839	'unroll': 7	'update_epoch': 15	'discount': 0.9765534566320507	'lr': 0.00011024162711053316	'entropy': 0.031052282513685345}. Best is trial 13 with value: -5654.12548828125. [0m
[32m[I 2021-12-12 01:17:59	260] [0m Trial 60 finished with value: -1872.1954345703125 and parameters: {'r_scaling': 14.884325734952517	'unroll': 6	'update_epoch': 14	'discount': 0.9901906549261893	'lr': 0.0002230782699222965	'entropy': 0.0023973657282205995}. Best is trial 13 with value: -5654.12548828125. [0m
[32m[I 2021-12-12 01:23:43	813] [0m Trial 61 finished with value: -1796.4627685546875 and parameters: {'r_scaling': 24.69496285875727	'unroll': 5	'update_epoch': 15	'discount': 0.9842670626717424	'lr': 0.00012541038964320345	'entropy': 0.008261152475435095}. Best is trial 13 with value: -5654.12548828125. [0m
[32m[I 2021-12-12 01:28:40	325] [0m Trial 62 finished with value: -5073.01513671875 and parameters: {'r_scaling': 37.42832104427402	'unroll': 7	'update_epoch': 12	'discount': 0.9947504430402797	'lr': 0.00014212159169054724	'entropy': 0.0032214026652301717}. Best is trial 13 with value: -5654.12548828125. [0m
[32m[I 2021-12-12 01:33:22	832] [0m Trial 63 finished with value: -4270.60986328125 and parameters: {'r_scaling': 41.129387006481714	'unroll': 8	'update_epoch': 14	'discount': 0.9946703530820825	'lr': 0.00014485260653473235	'entropy': 0.0030532196358142374}. Best is trial 13 with value: -5654.12548828125. [0m
[32m[I 2021-12-12 01:38:25	863] [0m Trial 64 finished with value: -341.7412414550781 and parameters: {'r_scaling': 15.039550809371677	'unroll': 7	'update_epoch': 12	'discount': 0.9381244979728014	'lr': 0.0019745560315031527	'entropy': 0.0019549645595680187}. Best is trial 13 with value: -5654.12548828125. [0m
[32m[I 2021-12-12 01:43:29	772] [0m Trial 65 finished with value: -1145.3641357421875 and parameters: {'r_scaling': 5.645836847199923	'unroll': 7	'update_epoch': 13	'discount': 0.9871362379541506	'lr': 0.00011163990116726546	'entropy': 0.005078623151752946}. Best is trial 13 with value: -5654.12548828125. [0m
[32m[I 2021-12-12 01:49:10	226] [0m Trial 66 finished with value: -1127.8819580078125 and parameters: {'r_scaling': 66.57369307381259	'unroll': 6	'update_epoch': 15	'discount': 0.9801659729307369	'lr': 0.00020187090712499463	'entropy': 0.0036159057805891007}. Best is trial 13 with value: -5654.12548828125. [0m
[32m[I 2021-12-12 01:53:53	207] [0m Trial 67 finished with value: -1602.0631103515625 and parameters: {'r_scaling': 142.21462578517824	'unroll': 8	'update_epoch': 14	'discount': 0.9909961717548068	'lr': 0.0001356212950831948	'entropy': 0.0009515561387283321}. Best is trial 13 with value: -5654.12548828125. [0m
[32m[I 2021-12-12 01:59:03	492] [0m Trial 68 finished with value: -747.7129516601562 and parameters: {'r_scaling': 38.93801932542009	'unroll': 4	'update_epoch': 13	'discount': 0.9705359915511952	'lr': 0.0001732509886304655	'entropy': 0.0016382956032475254}. Best is trial 13 with value: -5654.12548828125. [0m
[32m[I 2021-12-12 02:03:47	323] [0m Trial 69 finished with value: -3481.20751953125 and parameters: {'r_scaling': 3.9557438734973416	'unroll': 7	'update_epoch': 10	'discount': 0.9917766793657378	'lr': 0.00015349422266302986	'entropy': 0.0012715478613801183}. Best is trial 13 with value: -5654.12548828125. [0m
[32m[I 2021-12-12 02:08:39	421] [0m Trial 70 finished with value: -1583.7337646484375 and parameters: {'r_scaling': 24.052736336665827	'unroll': 9	'update_epoch': 15	'discount': 0.985819376458292	'lr': 0.0005971333960752415	'entropy': 0.0023741692132950134}. Best is trial 13 with value: -5654.12548828125. [0m
[32m[I 2021-12-12 02:13:56	792] [0m Trial 71 finished with value: -980.6854858398438 and parameters: {'r_scaling': 11.709507295718664	'unroll': 5	'update_epoch': 12	'discount': 0.9828082758853789	'lr': 0.00012698183712696868	'entropy': 0.0005192599843340295}. Best is trial 13 with value: -5654.12548828125. [0m
[32m[I 2021-12-12 02:18:56	909] [0m Trial 72 finished with value: -1208.5452880859375 and parameters: {'r_scaling': 44.982721548389875	'unroll': 6	'update_epoch': 11	'discount': 0.9761329806371986	'lr': 0.00010803939884246558	'entropy': 0.0067243314758585635}. Best is trial 13 with value: -5654.12548828125. [0m
[32m[I 2021-12-12 02:23:31	879] [0m Trial 73 finished with value: -3819.695068359375 and parameters: {'r_scaling': 33.95138494652063	'unroll': 5	'update_epoch': 8	'discount': 0.9885183627985039	'lr': 0.0001240341958834019	'entropy': 0.004870339622135713}. Best is trial 13 with value: -5654.12548828125. [0m
[32m[I 2021-12-12 02:28:16	270] [0m Trial 74 finished with value: -2406.0166015625 and parameters: {'r_scaling': 2.268216099004154	'unroll': 6	'update_epoch': 9	'discount': 0.9798472351730102	'lr': 0.00014076647060084455	'entropy': 0.009380853833338967}. Best is trial 13 with value: -5654.12548828125. [0m
[32m[I 2021-12-12 02:32:35	538] [0m Trial 75 finished with value: -4383.12255859375 and parameters: {'r_scaling': 0.2944771779490353	'unroll': 8	'update_epoch': 10	'discount': 0.9924377137061916	'lr': 0.00010610682992629695	'entropy': 0.024008581670406714}. Best is trial 13 with value: -5654.12548828125. [0m
[32m[I 2021-12-12 02:37:54	888] [0m Trial 76 finished with value: -896.4535522460938 and parameters: {'r_scaling': 105.14715498397756	'unroll': 5	'update_epoch': 12	'discount': 0.9832704159902814	'lr': 0.00018671419111063726	'entropy': 0.015784253418500708}. Best is trial 13 with value: -5654.12548828125. [0m
[32m[I 2021-12-12 02:43:08	111] [0m Trial 77 finished with value: -1239.9521484375 and parameters: {'r_scaling': 17.84106034039972	'unroll': 7	'update_epoch': 14	'discount': 0.994885789439961	'lr': 0.000121425572799768	'entropy': 0.0039799839687517215}. Best is trial 13 with value: -5654.12548828125. [0m
[32m[I 2021-12-12 02:48:44	187] [0m Trial 78 finished with value: -5574.201171875 and parameters: {'r_scaling': 70.32691906765744	'unroll': 6	'update_epoch': 15	'discount': 0.9861253908635315	'lr': 0.0001495896185991428	'entropy': 0.011670876025248958}. Best is trial 13 with value: -5654.12548828125. [0m
[32m[I 2021-12-12 02:54:14	857] [0m Trial 79 finished with value: -2614.647216796875 and parameters: {'r_scaling': 70.78365319625742	'unroll': 6	'update_epoch': 15	'discount': 0.9872101065107617	'lr': 0.00024360954777695036	'entropy': 0.011857497976375395}. Best is trial 13 with value: -5654.12548828125. [0m
[32m[I 2021-12-12 02:59:33	583] [0m Trial 80 finished with value: -1136.193359375 and parameters: {'r_scaling': 31.332180092454582	'unroll': 7	'update_epoch': 15	'discount': 0.9885073437255888	'lr': 0.00015942139835350467	'entropy': 0.0027860161421535126}. Best is trial 13 with value: -5654.12548828125. [0m
[32m[I 2021-12-12 03:05:01	320] [0m Trial 81 finished with value: -4677.1748046875 and parameters: {'r_scaling': 21.919633040844694	'unroll': 6	'update_epoch': 14	'discount': 0.984917512662401	'lr': 0.0001368269747359645	'entropy': 0.00563851220245842}. Best is trial 13 with value: -5654.12548828125. [0m
[32m[I 2021-12-12 03:10:39	442] [0m Trial 82 finished with value: -3555.845703125 and parameters: {'r_scaling': 21.29258260855957	'unroll': 6	'update_epoch': 14	'discount': 0.9903249586961062	'lr': 0.00013958637156246046	'entropy': 0.006240390427035486}. Best is trial 13 with value: -5654.12548828125. [0m
[32m[I 2021-12-12 03:15:58	248] [0m Trial 83 finished with value: -5393.63623046875 and parameters: {'r_scaling': 47.7594390121863	'unroll': 7	'update_epoch': 15	'discount': 0.9845674955786796	'lr': 0.00010706537825012464	'entropy': 0.007166913588477509}. Best is trial 13 with value: -5654.12548828125. [0m
[32m[I 2021-12-12 03:21:18	329] [0m Trial 84 finished with value: -1344.370849609375 and parameters: {'r_scaling': 93.7061969367796	'unroll': 7	'update_epoch': 15	'discount': 0.9785643641204387	'lr': 0.00010617426385014322	'entropy': 0.007641326905505056}. Best is trial 13 with value: -5654.12548828125. [0m
[32m[I 2021-12-12 03:26:06	764] [0m Trial 85 finished with value: -949.608642578125 and parameters: {'r_scaling': 140.21591631744755	'unroll': 8	'update_epoch': 15	'discount': 0.9816969985580802	'lr': 0.00011582489473521727	'entropy': 0.036062305498743986}. Best is trial 13 with value: -5654.12548828125. [0m
[32m[I 2021-12-12 03:30:18	964] [0m Trial 86 finished with value: -1421.9732666015625 and parameters: {'r_scaling': 63.484305004677736	'unroll': 7	'update_epoch': 6	'discount': 0.992104846684625	'lr': 0.0001488549650124079	'entropy': 0.020102661510130168}. Best is trial 13 with value: -5654.12548828125. [0m
[32m[I 2021-12-12 03:35:24	247] [0m Trial 87 finished with value: -1106.8458251953125 and parameters: {'r_scaling': 48.566804260435724	'unroll': 15	'update_epoch': 15	'discount': 0.9724416339087859	'lr': 0.00010275022982755997	'entropy': 0.0035716047213082704}. Best is trial 13 with value: -5654.12548828125. [0m
[32m[I 2021-12-12 03:40:14	347] [0m Trial 88 finished with value: -664.885009765625 and parameters: {'r_scaling': 85.3427614076663	'unroll': 8	'update_epoch': 14	'discount': 0.9470072332047885	'lr': 0.00039443977333032313	'entropy': 0.010886413741854515}. Best is trial 13 with value: -5654.12548828125. [0m
[32m[I 2021-12-12 03:43:56	262] [0m Trial 89 finished with value: -873.3541259765625 and parameters: {'r_scaling': 38.38925708734021	'unroll': 4	'update_epoch': 2	'discount': 0.9854377876362392	'lr': 0.00016882117568874552	'entropy': 0.06596724278911036}. Best is trial 13 with value: -5654.12548828125. [0m
[32m[I 2021-12-12 03:48:58	725] [0m Trial 90 finished with value: -1002.1653442382812 and parameters: {'r_scaling': 28.95845637556428	'unroll': 7	'update_epoch': 13	'discount': 0.9894595377439186	'lr': 0.00011576748892218445	'entropy': 0.004355888237773823}. Best is trial 13 with value: -5654.12548828125. [0m
[32m[I 2021-12-12 03:54:24	783] [0m Trial 91 finished with value: -3345.567626953125 and parameters: {'r_scaling': 15.478425377470261	'unroll': 6	'update_epoch': 14	'discount': 0.9863380600235454	'lr': 0.00013246307388698766	'entropy': 0.005557603831505867}. Best is trial 13 with value: -5654.12548828125. [0m
[32m[I 2021-12-12 03:59:47	458] [0m Trial 92 finished with value: -2420.231689453125 and parameters: {'r_scaling': 9.980509205386864	'unroll': 6	'update_epoch': 14	'discount': 0.9842688737379036	'lr': 0.00013200841617177985	'entropy': 0.007187421348332112}. Best is trial 13 with value: -5654.12548828125. [0m
[32m[I 2021-12-12 04:05:19	365] [0m Trial 93 finished with value: -2542.5087890625 and parameters: {'r_scaling': 6.922452877065645	'unroll': 5	'update_epoch': 15	'discount': 0.9815669864284639	'lr': 0.00018254448163133917	'entropy': 0.004939970951421218}. Best is trial 13 with value: -5654.12548828125. [0m
[32m[I 2021-12-12 04:10:25	790] [0m Trial 94 finished with value: -1026.016357421875 and parameters: {'r_scaling': 24.419566359256475	'unroll': 7	'update_epoch': 14	'discount': 0.9930250877833738	'lr': 0.00015333180771447767	'entropy': 0.013807728632010534}. Best is trial 13 with value: -5654.12548828125. [0m
[32m[I 2021-12-12 04:16:06	895] [0m Trial 95 finished with value: -1589.5965576171875 and parameters: {'r_scaling': 11.995571154284322	'unroll': 6	'update_epoch': 15	'discount': 0.9761799965188128	'lr': 0.00010043761537690505	'entropy': 0.007898866842011519}. Best is trial 13 with value: -5654.12548828125. [0m
[32m[I 2021-12-12 04:20:45	295] [0m Trial 96 finished with value: -1414.2166748046875 and parameters: {'r_scaling': 57.81624462658384	'unroll': 7	'update_epoch': 13	'discount': 0.9888459805515636	'lr': 0.0002085134763234478	'entropy': 0.005889443417564687}. Best is trial 13 with value: -5654.12548828125. [0m
[32m[I 2021-12-12 04:25:31	912] [0m Trial 97 finished with value: -857.2425537109375 and parameters: {'r_scaling': 46.24723107287529	'unroll': 9	'update_epoch': 15	'discount': 0.984791054008394	'lr': 0.00011807359368139233	'entropy': 0.00888251489829157}. Best is trial 13 with value: -5654.12548828125. [0m
[32m[I 2021-12-12 04:30:58	450] [0m Trial 98 finished with value: -1310.0657958984375 and parameters: {'r_scaling': 17.767512902930317	'unroll': 6	'update_epoch': 14	'discount': 0.9791109545160399	'lr': 0.00010970014083965543	'entropy': 0.003425862176934027}. Best is trial 13 with value: -5654.12548828125. [0m
[32m[I 2021-12-12 04:36:35	379] [0m Trial 99 finished with value: -4384.55908203125 and parameters: {'r_scaling': 0.06305856739065037	'unroll': 5	'update_epoch': 15	'discount': 0.9669466156304802	'lr': 0.00014174801383669587	'entropy': 0.0020444344785133066}. Best is trial 13 with value: -5654.12548828125. [0m
[32m[I 2021-12-12 04:41:12	257] [0m Trial 100 finished with value: -980.8463745117188 and parameters: {'r_scaling': 32.313741885803935	'unroll': 8	'update_epoch': 13	'discount': 0.9948090478728016	'lr': 0.0001642516877745657	'entropy': 0.004022898018495811}. Best is trial 13 with value: -5654.12548828125. [0m
[32m[I 2021-12-12 04:46:16	533] [0m Trial 101 finished with value: -5600.11376953125 and parameters: {'r_scaling': 24.476338663389814	'unroll': 5	'update_epoch': 11	'discount': 0.9871117286157122	'lr': 0.00012512763025747614	'entropy': 0.010257495059063412}. Best is trial 13 with value: -5654.12548828125. [0m
[32m[I 2021-12-12 04:51:50	970] [0m Trial 102 finished with value: -1227.9693603515625 and parameters: {'r_scaling': 21.93209407543046	'unroll': 5	'update_epoch': 14	'discount': 0.9870733743248958	'lr': 0.00012966837634992867	'entropy': 0.01694045796211413}. Best is trial 13 with value: -5654.12548828125. [0m
[32m[I 2021-12-12 04:56:21	852] [0m Trial 103 finished with value: -5290.72314453125 and parameters: {'r_scaling': 25.952052734668285	'unroll': 6	'update_epoch': 8	'discount': 0.990726244994026	'lr': 0.00011201760054378595	'entropy': 0.006459078533592368}. Best is trial 13 with value: -5654.12548828125. [0m
[32m[I 2021-12-12 05:00:48	092] [0m Trial 104 finished with value: -2104.622802734375 and parameters: {'r_scaling': 27.36788992216835	'unroll': 7	'update_epoch': 8	'discount': 0.9906781146704168	'lr': 0.00012057517669858132	'entropy': 0.012770853929889761}. Best is trial 13 with value: -5654.12548828125. [0m
[32m[I 2021-12-12 05:05:33	143] [0m Trial 105 finished with value: -3950.8837890625 and parameters: {'r_scaling': 37.01907614719205	'unroll': 5	'update_epoch': 9	'discount': 0.9925140910542771	'lr': 0.00010741636994568983	'entropy': 0.010556668421795113}. Best is trial 13 with value: -5654.12548828125. [0m
[32m[I 2021-12-12 05:10:25	669] [0m Trial 106 finished with value: -1020.7446899414062 and parameters: {'r_scaling': 73.04202149651107	'unroll': 6	'update_epoch': 10	'discount': 0.9818624948131034	'lr': 0.0001137475841993702	'entropy': 0.002834269614804352}. Best is trial 13 with value: -5654.12548828125. [0m
[32m[I 2021-12-12 05:14:29	317] [0m Trial 107 finished with value: -1250.1593017578125 and parameters: {'r_scaling': 43.823953121406674	'unroll': 8	'update_epoch': 7	'discount': 0.9898769860785707	'lr': 0.00012453698475447972	'entropy': 0.008935358476600753}. Best is trial 13 with value: -5654.12548828125. [0m
[32m[I 2021-12-12 05:19:03	931] [0m Trial 108 finished with value: -2388.531005859375 and parameters: {'r_scaling': 61.00954998087012	'unroll': 4	'update_epoch': 8	'discount': 0.98664715643432	'lr': 0.00015051811566380222	'entropy': 0.03014890016367142}. Best is trial 13 with value: -5654.12548828125. [0m
[32m[I 2021-12-12 05:23:29	081] [0m Trial 109 finished with value: -3132.036376953125 and parameters: {'r_scaling': 13.252140805898366	'unroll': 6	'update_epoch': 7	'discount': 0.9884393863035392	'lr': 0.00010437619447469047	'entropy': 0.005075909054962818}. Best is trial 13 with value: -5654.12548828125. [0m
[32m[I 2021-12-12 05:27:51	423] [0m Trial 110 finished with value: -4267.26416015625 and parameters: {'r_scaling': 18.05510462900928	'unroll': 7	'update_epoch': 6	'discount': 0.9928304156238045	'lr': 0.00011286183368946648	'entropy': 0.019925052789841118}. Best is trial 13 with value: -5654.12548828125. [0m
[32m[I 2021-12-12 05:33:26	158] [0m Trial 111 finished with value: -4872.77587890625 and parameters: {'r_scaling': 25.488133051323796	'unroll': 6	'update_epoch': 15	'discount': 0.9846337841312871	'lr': 0.00013733145731771815	'entropy': 0.006900500293846551}. Best is trial 13 with value: -5654.12548828125. [0m
[32m[I 2021-12-12 05:39:01	496] [0m Trial 112 finished with value: -4743.62109375 and parameters: {'r_scaling': 33.83978920992375	'unroll': 6	'update_epoch': 15	'discount': 0.9829344384961884	'lr': 0.00012964730075752524	'entropy': 0.006905393219600351}. Best is trial 13 with value: -5654.12548828125. [0m
[32m[I 2021-12-12 05:44:20	906] [0m Trial 113 finished with value: -4996.19775390625 and parameters: {'r_scaling': 25.920792082717316	'unroll': 7	'update_epoch': 15	'discount': 0.9908900664218309	'lr': 0.00012100662006954355	'entropy': 0.006357940948237498}. Best is trial 13 with value: -5654.12548828125. [0m
[32m[I 2021-12-12 05:49:41	975] [0m Trial 114 finished with value: -762.0466918945312 and parameters: {'r_scaling': 29.58882086935678	'unroll': 7	'update_epoch': 15	'discount': 0.9193103711308448	'lr': 0.00010763698402625184	'entropy': 0.00010861022508873001}. Best is trial 13 with value: -5654.12548828125. [0m
[32m[I 2021-12-12 05:54:29	954] [0m Trial 115 finished with value: -978.840576171875 and parameters: {'r_scaling': 16.45641213377028	'unroll': 7	'update_epoch': 11	'discount': 0.990658766999101	'lr': 0.00011789362606218703	'entropy': 0.004175681703668942}. Best is trial 13 with value: -5654.12548828125. [0m
[32m[I 2021-12-12 05:59:11	685] [0m Trial 116 finished with value: -1185.23193359375 and parameters: {'r_scaling': 1.6569783453333764	'unroll': 5	'update_epoch': 9	'discount': 0.9876643181999135	'lr': 0.0001239157563516922	'entropy': 0.0032051232011814524}. Best is trial 13 with value: -5654.12548828125. [0m
[32m[I 2021-12-12 06:04:04	851] [0m Trial 117 finished with value: -1294.1658935546875 and parameters: {'r_scaling': 53.49989655782232	'unroll': 2	'update_epoch': 8	'discount': 0.9923718156264731	'lr': 0.0001003781727448507	'entropy': 0.006021281270101888}. Best is trial 13 with value: -5654.12548828125. [0m
[32m[I 2021-12-12 06:10:20	970] [0m Trial 118 finished with value: -936.7509765625 and parameters: {'r_scaling': 40.61705538582886	'unroll': 8	'update_epoch': 15	'discount': 0.9941266838419149	'lr': 0.00014422916969877118	'entropy': 0.01165912430585264}. Best is trial 13 with value: -5654.12548828125. [0m
[32m[I 2021-12-12 06:17:08	549] [0m Trial 119 finished with value: -5548.4814453125 and parameters: {'r_scaling': 130.38882396778718	'unroll': 7	'update_epoch': 10	'discount': 0.9894334027062331	'lr': 0.00015690486167046122	'entropy': 0.0046535050568371795}. Best is trial 13 with value: -5654.12548828125. [0m
[32m[I 2021-12-12 06:22:06	779] [0m Trial 120 finished with value: -1022.6339111328125 and parameters: {'r_scaling': 131.8757794491612	'unroll': 6	'update_epoch': 10	'discount': 0.9556082056227424	'lr': 0.00019983445755534647	'entropy': 0.002619515094151057}. Best is trial 13 with value: -5654.12548828125. [0m
[32m[I 2021-12-12 06:26:51	105] [0m Trial 121 finished with value: -5890.07958984375 and parameters: {'r_scaling': 166.6577166441681	'unroll': 7	'update_epoch': 10	'discount': 0.9904336642762739	'lr': 0.00015893388679488675	'entropy': 0.004895798866845051}. Best is trial 121 with value: -5890.07958984375. [0m
[32m[I 2021-12-12 06:31:14	504] [0m Trial 122 finished with value: -858.6915893554688 and parameters: {'r_scaling': 168.04431235656224	'unroll': 8	'update_epoch': 11	'discount': 0.9887326524803235	'lr': 0.00017619976741040333	'entropy': 0.00511747585036874}. Best is trial 121 with value: -5890.07958984375. [0m
[32m[I 2021-12-12 06:35:46	436] [0m Trial 123 finished with value: -4733.33251953125 and parameters: {'r_scaling': 117.13808701009326	'unroll': 7	'update_epoch': 10	'discount': 0.9865192566003018	'lr': 0.0001553411559721876	'entropy': 0.004484589526948416}. Best is trial 121 with value: -5890.07958984375. [0m
[32m[I 2021-12-12 06:40:20	617] [0m Trial 124 finished with value: -2464.140869140625 and parameters: {'r_scaling': 93.03061096580372	'unroll': 6	'update_epoch': 9	'discount': 0.981011195065103	'lr': 0.0001824168988530366	'entropy': 0.007976901051796575}. Best is trial 121 with value: -5890.07958984375. [0m
[32m[I 2021-12-12 06:46:09	959] [0m Trial 125 finished with value: -4956.23046875 and parameters: {'r_scaling': 190.92915004446053	'unroll': 7	'update_epoch': 11	'discount': 0.9900437990415834	'lr': 0.00016280553247185415	'entropy': 0.01493206552241223}. Best is trial 121 with value: -5890.07958984375. [0m
[32m[I 2021-12-12 06:50:37	739] [0m Trial 126 finished with value: -285.36395263671875 and parameters: {'r_scaling': 114.4154942885228	'unroll': 7	'update_epoch': 10	'discount': 0.9846010516285488	'lr': 0.0014548391259466592	'entropy': 0.003813482261128141}. Best is trial 121 with value: -5890.07958984375. [0m
[32m[I 2021-12-12 06:55:53	892] [0m Trial 127 finished with value: -1038.83251953125 and parameters: {'r_scaling': 159.59074237757466	'unroll': 14	'update_epoch': 9	'discount': 0.9877651243369133	'lr': 0.00014317224831070113	'entropy': 0.009722060136741076}. Best is trial 121 with value: -5890.07958984375. [0m
[32m[I 2021-12-12 07:01:43	713] [0m Trial 128 finished with value: -1048.749755859375 and parameters: {'r_scaling': 46.43027076169264	'unroll': 6	'update_epoch': 12	'discount': 0.9398469834991998	'lr': 0.0001102727357358207	'entropy': 0.002325881750505765}. Best is trial 121 with value: -5890.07958984375. [0m
[32m[I 2021-12-12 07:06:37	552] [0m Trial 129 finished with value: -2283.70556640625 and parameters: {'r_scaling': 83.3674674752807	'unroll': 8	'update_epoch': 10	'discount': 0.9946770381988403	'lr': 0.00013132327228914057	'entropy': 0.0031581909805698215}. Best is trial 121 with value: -5890.07958984375. [0m
[32m[I 2021-12-12 07:11:46	727] [0m Trial 130 finished with value: -884.0308227539062 and parameters: {'r_scaling': 9.400688268716268	'unroll': 7	'update_epoch': 9	'discount': 0.9919753397022826	'lr': 0.00015331017587598826	'entropy': 0.05078210756994303}. Best is trial 121 with value: -5890.07958984375. [0m
[32m[I 2021-12-12 07:17:36	440] [0m Trial 131 finished with value: -4083.484375 and parameters: {'r_scaling': 0.9533606609543499	'unroll': 7	'update_epoch': 15	'discount': 0.9906219889174751	'lr': 0.00011937270228426299	'entropy': 0.005972419368528881}. Best is trial 121 with value: -5890.07958984375. [0m
[32m[I 2021-12-12 07:23:33	900] [0m Trial 132 finished with value: -2362.828125 and parameters: {'r_scaling': 21.17448078847771	'unroll': 7	'update_epoch': 15	'discount': 0.9860717742902988	'lr': 0.0001240279915519309	'entropy': 0.006573769245030491}. Best is trial 121 with value: -5890.07958984375. [0m
[32m[I 2021-12-12 07:29:16	427] [0m Trial 133 finished with value: -977.9840698242188 and parameters: {'r_scaling': 25.72091387890779	'unroll': 6	'update_epoch': 11	'discount': 0.9889691006459664	'lr': 0.000748593891711361	'entropy': 0.004648165522040837}. Best is trial 121 with value: -5890.07958984375. [0m
[32m[I 2021-12-12 07:33:43	245] [0m Trial 134 finished with value: -3501.569091796875 and parameters: {'r_scaling': 35.08408933191709	'unroll': 7	'update_epoch': 10	'discount': 0.9915189385171511	'lr': 0.00016707878887333135	'entropy': 0.00828618218231804}. Best is trial 121 with value: -5890.07958984375. [0m
[32m[I 2021-12-12 07:39:47	575] [0m Trial 135 finished with value: -5839.44921875 and parameters: {'r_scaling': 14.052894830959323	'unroll': 5	'update_epoch': 14	'discount': 0.9928820851339641	'lr': 0.00010484815231665564	'entropy': 0.005177158931567026}. Best is trial 121 with value: -5890.07958984375. [0m
[32m[I 2021-12-12 07:46:11	817] [0m Trial 136 finished with value: -5609.11328125 and parameters: {'r_scaling': 4.219871643537133	'unroll': 5	'update_epoch': 14	'discount': 0.9932958355569026	'lr': 0.00010009677669805017	'entropy': 0.005287507542346047}. Best is trial 121 with value: -5890.07958984375. [0m
[32m[I 2021-12-12 07:52:07	118] [0m Trial 137 finished with value: -1032.11767578125 and parameters: {'r_scaling': 8.3852136828967	'unroll': 4	'update_epoch': 14	'discount': 0.9829309847994575	'lr': 0.0001008048708929739	'entropy': 0.005144412532367896}. Best is trial 121 with value: -5890.07958984375. [0m
[32m[I 2021-12-12 07:58:07	937] [0m Trial 138 finished with value: -4388.1025390625 and parameters: {'r_scaling': 5.613827870294819	'unroll': 5	'update_epoch': 14	'discount': 0.9931437705684287	'lr': 0.00010790603903471069	'entropy': 0.00736145331064987}. Best is trial 121 with value: -5890.07958984375. [0m
[32m[I 2021-12-12 08:04:10	803] [0m Trial 139 finished with value: -1593.98681640625 and parameters: {'r_scaling': 13.921231916241508	'unroll': 5	'update_epoch': 14	'discount': 0.9871947474097037	'lr': 0.00011502840186467413	'entropy': 0.0036347066670832386}. Best is trial 121 with value: -5890.07958984375. [0m
[32m[I 2021-12-12 08:09:13	311] [0m Trial 140 finished with value: -1325.3812255859375 and parameters: {'r_scaling': 2.7424052217712234	'unroll': 4	'update_epoch': 8	'discount': 0.9792879490103977	'lr': 0.0001046149803588256	'entropy': 0.0867611036903729}. Best is trial 121 with value: -5890.07958984375. [0m
[32m[I 2021-12-12 08:15:04	718] [0m Trial 141 finished with value: -6419.98779296875 and parameters: {'r_scaling': 4.053393681639243	'unroll': 5	'update_epoch': 13	'discount': 0.9949405416137207	'lr': 0.00011146535362233627	'entropy': 0.004165081309298116}. Best is trial 141 with value: -6419.98779296875. [0m
[32m[I 2021-12-12 08:21:03	031] [0m Trial 142 finished with value: -4818.65185546875 and parameters: {'r_scaling': 4.475831532711935	'unroll': 5	'update_epoch': 13	'discount': 0.9897315072894498	'lr': 0.00011128136042982572	'entropy': 0.004228016917840539}. Best is trial 141 with value: -6419.98779296875. [0m
[32m[I 2021-12-12 08:27:03	009] [0m Trial 143 finished with value: -2588.317138671875 and parameters: {'r_scaling': 3.5508211894171406	'unroll': 5	'update_epoch': 14	'discount': 0.9949107813272743	'lr': 0.00010005678862649407	'entropy': 0.0054473816814846485}. Best is trial 141 with value: -6419.98779296875. [0m
[32m[I 2021-12-12 08:33:08	694] [0m Trial 144 finished with value: -926.8201293945312 and parameters: {'r_scaling': 2.173893099380872	'unroll': 4	'update_epoch': 15	'discount': 0.9931280737251483	'lr': 0.00011387587910462383	'entropy': 0.0046237284448310614}. Best is trial 141 with value: -6419.98779296875. [0m
[32m[I 2021-12-12 08:39:19	783] [0m Trial 145 finished with value: -4093.710205078125 and parameters: {'r_scaling': 7.015381135817901	'unroll': 5	'update_epoch': 13	'discount': 0.9855343850523232	'lr': 0.00010638329930339259	'entropy': 0.009297213853886564}. Best is trial 141 with value: -6419.98779296875. [0m
[32m[I 2021-12-12 08:45:20	975] [0m Trial 146 finished with value: -1657.869873046875 and parameters: {'r_scaling': 3.5509179248047467	'unroll': 6	'update_epoch': 14	'discount': 0.9883564406748304	'lr': 0.0001307834694311665	'entropy': 0.005722815138454871}. Best is trial 141 with value: -6419.98779296875. [0m
[32m[I 2021-12-12 08:51:32	383] [0m Trial 147 finished with value: -1822.3240966796875 and parameters: {'r_scaling': 11.321403127615804	'unroll': 6	'update_epoch': 15	'discount': 0.9914246312328766	'lr': 0.00033422687954455917	'entropy': 0.0076214657432456066}. Best is trial 141 with value: -6419.98779296875. [0m
[32m[I 2021-12-12 08:57:36	343] [0m Trial 148 finished with value: -999.0201416015625 and parameters: {'r_scaling': 6.254701730326223	'unroll': 5	'update_epoch': 14	'discount': 0.9622652562168822	'lr': 0.0001166467858231635	'entropy': 0.0038996132546179553}. Best is trial 141 with value: -6419.98779296875. [0m
[32m[I 2021-12-12 09:03:46	077] [0m Trial 149 finished with value: -3089.3291015625 and parameters: {'r_scaling': 4.7877679992799855	'unroll': 6	'update_epoch': 15	'discount': 0.9847183004418344	'lr': 0.0001252199155783442	'entropy': 0.03900981193840577}. Best is trial 141 with value: -6419.98779296875. [0m
[32m[I 2021-12-12 09:10:12	200] [0m Trial 150 finished with value: -2072.624755859375 and parameters: {'r_scaling': 19.295734353190127	'unroll': 3	'update_epoch': 14	'discount': 0.9890888304861412	'lr': 0.0009243543126993112	'entropy': 0.00024332594384123246}. Best is trial 141 with value: -6419.98779296875. [0m
[32m[I 2021-12-12 09:16:01	577] [0m Trial 151 finished with value: -5306.1123046875 and parameters: {'r_scaling': 66.47445374063916	'unroll': 6	'update_epoch': 12	'discount': 0.993037817033916	'lr': 0.00013885952857585078	'entropy': 0.002959709539816336}. Best is trial 141 with value: -6419.98779296875. [0m
[32m[I 2021-12-12 09:21:42	984] [0m Trial 152 finished with value: -5539.94482421875 and parameters: {'r_scaling': 99.66391426230815	'unroll': 6	'update_epoch': 12	'discount': 0.9928409663711959	'lr': 0.00010727478096240132	'entropy': 0.002845263138783192}. Best is trial 141 with value: -6419.98779296875. [0m
[32m[I 2021-12-12 09:27:26	406] [0m Trial 153 finished with value: -5521.36767578125 and parameters: {'r_scaling': 98.23127133950867	'unroll': 6	'update_epoch': 12	'discount': 0.9924471521518248	'lr': 0.00013516358969070793	'entropy': 0.0017421355400135433}. Best is trial 141 with value: -6419.98779296875. [0m
[32m[I 2021-12-12 09:33:23	152] [0m Trial 154 finished with value: -1402.515380859375 and parameters: {'r_scaling': 105.46135672745866	'unroll': 5	'update_epoch': 12	'discount': 0.9932407253377462	'lr': 0.00013879929421580734	'entropy': 0.0019106405182986253}. Best is trial 141 with value: -6419.98779296875. [0m
[32m[I 2021-12-12 09:39:08	942] [0m Trial 155 finished with value: -5698.2978515625 and parameters: {'r_scaling': 133.1314161095968	'unroll': 6	'update_epoch': 12	'discount': 0.9928165401154654	'lr': 0.00014828255205016338	'entropy': 0.002387319326808263}. Best is trial 141 with value: -6419.98779296875. [0m
[32m[I 2021-12-12 09:44:47	588] [0m Trial 156 finished with value: -707.54833984375 and parameters: {'r_scaling': 125.51588822060134	'unroll': 6	'update_epoch': 12	'discount': 0.9058265512108539	'lr': 0.0001482115927218995	'entropy': 0.0017620228362703904}. Best is trial 141 with value: -6419.98779296875. [0m
[32m[I 2021-12-12 09:50:16	110] [0m Trial 157 finished with value: -5414.00732421875 and parameters: {'r_scaling': 77.19847033012309	'unroll': 4	'update_epoch': 11	'discount': 0.9928331208664887	'lr': 0.0001590123810264435	'entropy': 0.0022505853486565154}. Best is trial 141 with value: -6419.98779296875. [0m
[32m[I 2021-12-12 09:55:48	227] [0m Trial 158 finished with value: -912.3604125976562 and parameters: {'r_scaling': 154.77625347926212	'unroll': 4	'update_epoch': 11	'discount': 0.9945590772993261	'lr': 0.00019125725325015104	'entropy': 0.001560020235056358}. Best is trial 141 with value: -6419.98779296875. [0m
[32m[I 2021-12-12 10:01:26	722] [0m Trial 159 finished with value: -1568.656982421875 and parameters: {'r_scaling': 74.95730946849388	'unroll': 5	'update_epoch': 11	'discount': 0.9914976016206779	'lr': 0.0001725530466567976	'entropy': 0.0010922415036237383}. Best is trial 141 with value: -6419.98779296875. [0m
[32m[I 2021-12-12 10:07:11	305] [0m Trial 160 finished with value: -799.8656616210938 and parameters: {'r_scaling': 86.96164782502659	'unroll': 4	'update_epoch': 12	'discount': 0.9873607414223081	'lr': 0.00015868580873436958	'entropy': 0.0014083328683557874}. Best is trial 141 with value: -6419.98779296875. [0m
[32m[I 2021-12-12 10:12:30	359] [0m Trial 161 finished with value: -4846.69580078125 and parameters: {'r_scaling': 99.33478724078589	'unroll': 3	'update_epoch': 12	'discount': 0.992945651700936	'lr': 0.00013552977749552966	'entropy': 0.002371473307649961}. Best is trial 141 with value: -6419.98779296875. [0m
[32m[I 2021-12-12 10:18:16	334] [0m Trial 162 finished with value: -5489.3828125 and parameters: {'r_scaling': 68.06891437288563	'unroll': 6	'update_epoch': 12	'discount': 0.9924223124102102	'lr': 0.00014540754668742708	'entropy': 0.002165061449998691}. Best is trial 141 with value: -6419.98779296875. [0m
[32m[I 2021-12-12 10:23:58	056] [0m Trial 163 finished with value: -5310.84375 and parameters: {'r_scaling': 185.97532043583467	'unroll': 6	'update_epoch': 12	'discount': 0.9912818527229584	'lr': 0.0001606774698544374	'entropy': 0.002057954941851815}. Best is trial 141 with value: -6419.98779296875. [0m
[32m[I 2021-12-12 10:29:54	863] [0m Trial 164 finished with value: -2354.282958984375 and parameters: {'r_scaling': 125.6149654086601	'unroll': 5	'update_epoch': 11	'discount': 0.9895573416231389	'lr': 0.00014809148794312334	'entropy': 0.0022753161283490565}. Best is trial 141 with value: -6419.98779296875. [0m
[32m[I 2021-12-12 10:35:54	180] [0m Trial 165 finished with value: -1304.741455078125 and parameters: {'r_scaling': 78.56080907410585	'unroll': 5	'update_epoch': 13	'discount': 0.9948362254959037	'lr': 0.00018200253090044016	'entropy': 0.002856060172768972}. Best is trial 141 with value: -6419.98779296875. [0m
[32m[I 2021-12-12 10:41:30	841] [0m Trial 166 finished with value: -961.4644775390625 and parameters: {'r_scaling': 138.83597034200872	'unroll': 6	'update_epoch': 11	'discount': 0.9913251097424521	'lr': 0.00017027454887190264	'entropy': 0.0014360863364528294}. Best is trial 141 with value: -6419.98779296875. [0m
[32m[I 2021-12-12 10:46:26	219] [0m Trial 167 finished with value: -4755.9560546875 and parameters: {'r_scaling': 59.83848216048289	'unroll': 6	'update_epoch': 12	'discount': 0.9873078791775963	'lr': 0.00015436216786821768	'entropy': 0.0017834001178381386}. Best is trial 141 with value: -6419.98779296875. [0m
[32m[I 2021-12-12 10:52:07	824] [0m Trial 168 finished with value: -752.3458251953125 and parameters: {'r_scaling': 98.29342283741543	'unroll': 4	'update_epoch': 12	'discount': 0.9896265344640661	'lr': 0.0001289405977541425	'entropy': 0.0020984181692405325}. Best is trial 141 with value: -6419.98779296875. [0m
[32m[I 2021-12-12 10:58:07	695] [0m Trial 169 finished with value: -5427.244140625 and parameters: {'r_scaling': 114.88890716897454	'unroll': 6	'update_epoch': 13	'discount': 0.9931345851358078	'lr': 0.00010564528622488537	'entropy': 0.026566626140921267}. Best is trial 141 with value: -6419.98779296875. [0m
[32m[I 2021-12-12 11:04:06	417] [0m Trial 170 finished with value: -1415.4747314453125 and parameters: {'r_scaling': 121.26012539666138	'unroll': 5	'update_epoch': 13	'discount': 0.9923414905895349	'lr': 0.00014626269881730082	'entropy': 0.002587186074466997}. Best is trial 141 with value: -6419.98779296875. [0m
[32m[I 2021-12-12 11:10:03	398] [0m Trial 171 finished with value: -3715.709716796875 and parameters: {'r_scaling': 162.18711812865916	'unroll': 6	'update_epoch': 13	'discount': 0.9949913953471992	'lr': 0.00010566030822958561	'entropy': 0.021463466602205737}. Best is trial 141 with value: -6419.98779296875. [0m
[32m[I 2021-12-12 11:15:51	551] [0m Trial 172 finished with value: -5648.798828125 and parameters: {'r_scaling': 68.11088426008764	'unroll': 6	'update_epoch': 13	'discount': 0.9926653269908983	'lr': 0.00010833641238790953	'entropy': 0.02683525064496352}. Best is trial 141 with value: -6419.98779296875. [0m
[32m[I 2021-12-12 11:22:00	182] [0m Trial 173 finished with value: -1982.4732666015625 and parameters: {'r_scaling': 71.0301246139532	'unroll': 6	'update_epoch': 13	'discount': 0.9933436934977201	'lr': 0.00011997417208170864	'entropy': 0.02507159392172372}. Best is trial 141 with value: -6419.98779296875. [0m
[32m[I 2021-12-12 11:27:44	554] [0m Trial 174 finished with value: -4794.0966796875 and parameters: {'r_scaling': 94.8638399315142	'unroll': 6	'update_epoch': 12	'discount': 0.9901243776043916	'lr': 0.00010022598661628362	'entropy': 0.03419474426519936}. Best is trial 141 with value: -6419.98779296875. [0m
[32m[I 2021-12-12 11:33:36	049] [0m Trial 175 finished with value: -5045.77880859375 and parameters: {'r_scaling': 107.35187777164587	'unroll': 5	'update_epoch': 13	'discount': 0.9924519586089537	'lr': 0.00011222480680880027	'entropy': 0.024860494887290162}. Best is trial 141 with value: -6419.98779296875. [0m
[32m[I 2021-12-12 11:38:19	433] [0m Trial 176 finished with value: -3485.820068359375 and parameters: {'r_scaling': 198.7483654524749	'unroll': 6	'update_epoch': 11	'discount': 0.9883575367600259	'lr': 0.00012921402521485874	'entropy': 0.027385232390039826}. Best is trial 141 with value: -6419.98779296875. [0m
[32m[I 2021-12-12 11:44:10	934] [0m Trial 177 finished with value: -5413.9697265625 and parameters: {'r_scaling': 78.75295749867648	'unroll': 5	'update_epoch': 13	'discount': 0.9906843482064402	'lr': 0.00010819158544237536	'entropy': 0.0032535244365701783}. Best is trial 141 with value: -6419.98779296875. [0m
[32m[I 2021-12-12 11:50:07	256] [0m Trial 178 finished with value: -3541.935791015625 and parameters: {'r_scaling': 83.19318829195775	'unroll': 5	'update_epoch': 13	'discount': 0.9913349038048633	'lr': 0.0005746118415860298	'entropy': 0.044409482949021015}. Best is trial 141 with value: -6419.98779296875. [0m
[32m[I 2021-12-12 11:54:55	908] [0m Trial 179 finished with value: -5498.52880859375 and parameters: {'r_scaling': 55.356222346185945	'unroll': 4	'update_epoch': 12	'discount': 0.9949765432321569	'lr': 0.00011914674763634875	'entropy': 0.002657178610846612}. Best is trial 141 with value: -6419.98779296875. [0m
[32m[I 2021-12-12 11:59:44	712] [0m Trial 180 finished with value: -1060.0074462890625 and parameters: {'r_scaling': 57.61487729755961	'unroll': 4	'update_epoch': 12	'discount': 0.9948239207996774	'lr': 0.00012272825645394446	'entropy': 0.002575368648456036}. Best is trial 141 with value: -6419.98779296875. [0m
[32m[I 2021-12-12 12:04:47	757] [0m Trial 181 finished with value: -5285.20947265625 and parameters: {'r_scaling': 68.9283235832392	'unroll': 5	'update_epoch': 13	'discount': 0.9924215006150522	'lr': 0.00010974748712608127	'entropy': 0.017976867628833795}. Best is trial 141 with value: -6419.98779296875. [0m
[32m[I 2021-12-12 12:10:55	513] [0m Trial 182 finished with value: -4549.90234375 and parameters: {'r_scaling': 142.41719496636554	'unroll': 3	'update_epoch': 12	'discount': 0.9903434274333212	'lr': 0.00011595830585357989	'entropy': 0.002975781394039611}. Best is trial 141 with value: -6419.98779296875. [0m
[32m[I 2021-12-12 12:16:56	584] [0m Trial 183 finished with value: -945.1211547851562 and parameters: {'r_scaling': 82.28073975644315	'unroll': 4	'update_epoch': 12	'discount': 0.9931455230116701	'lr': 0.00016421694662592014	'entropy': 0.003723223943491988}. Best is trial 141 with value: -6419.98779296875. [0m
[32m[I 2021-12-12 12:22:51	415] [0m Trial 184 finished with value: -5397.56005859375 and parameters: {'r_scaling': 53.395399292954295	'unroll': 5	'update_epoch': 13	'discount': 0.9949702289780655	'lr': 0.0001359673956273395	'entropy': 0.0033308050542692567}. Best is trial 141 with value: -6419.98779296875. [0m
[32m[I 2021-12-12 12:28:36	729] [0m Trial 185 finished with value: -4914.44775390625 and parameters: {'r_scaling': 114.28537269682569	'unroll': 4	'update_epoch': 13	'discount': 0.9948619236779179	'lr': 0.00014214604077395735	'entropy': 0.0033781145810142968}. Best is trial 141 with value: -6419.98779296875. [0m
[32m[I 2021-12-12 12:34:23	984] [0m Trial 186 finished with value: -5131.2763671875 and parameters: {'r_scaling': 51.12261219325288	'unroll': 5	'update_epoch': 13	'discount': 0.9930187325201502	'lr': 0.0001350014756010212	'entropy': 0.0021438396260909398}. Best is trial 141 with value: -6419.98779296875. [0m
[32m[I 2021-12-12 12:39:00	885] [0m Trial 187 finished with value: -1128.40478515625 and parameters: {'r_scaling': 64.04171222052504	'unroll': 5	'update_epoch': 10	'discount': 0.99118100152511	'lr': 0.00015305988867095297	'entropy': 0.0026325098325630817}. Best is trial 141 with value: -6419.98779296875. [0m
[32m[I 2021-12-12 12:44:57	013] [0m Trial 188 finished with value: -5226.87939453125 and parameters: {'r_scaling': 90.9557994485734	'unroll': 5	'update_epoch': 13	'discount': 0.9949920838483746	'lr': 0.0001281899669094236	'entropy': 0.003317520008614935}. Best is trial 141 with value: -6419.98779296875. [0m
[32m[I 2021-12-12 12:49:36	882] [0m Trial 189 finished with value: -1060.2279052734375 and parameters: {'r_scaling': 73.63277071724211	'unroll': 4	'update_epoch': 11	'discount': 0.9893226818001261	'lr': 0.00014521859785134286	'entropy': 0.03257439898072078}. Best is trial 141 with value: -6419.98779296875. [0m
[32m[I 2021-12-12 12:55:27	168] [0m Trial 190 finished with value: -5163.9150390625 and parameters: {'r_scaling': 144.7578831920605	'unroll': 5	'update_epoch': 12	'discount': 0.9924504592181504	'lr': 0.00012000488462721242	'entropy': 0.0017385542019545369}. Best is trial 141 with value: -6419.98779296875. [0m
[32m[I 2021-12-12 13:01:12	801] [0m Trial 191 finished with value: -982.4498901367188 and parameters: {'r_scaling': 0.4108466771705809	'unroll': 6	'update_epoch': 12	'discount': 0.9906061466652221	'lr': 0.00010677202072968191	'entropy': 0.004253468927309834}. Best is trial 141 with value: -6419.98779296875. [0m
[32m[I 2021-12-12 13:06:14	621] [0m Trial 192 finished with value: -5195.46044921875 and parameters: {'r_scaling': 59.25660853846805	'unroll': 6	'update_epoch': 13	'discount': 0.9866727331550766	'lr': 0.00011501951719075578	'entropy': 0.0034226143184629986}. Best is trial 141 with value: -6419.98779296875. [0m
[32m[I 2021-12-12 13:12:02	282] [0m Trial 193 finished with value: -5494.54541015625 and parameters: {'r_scaling': 53.93519270499632	'unroll': 6	'update_epoch': 10	'discount': 0.9931103490738383	'lr': 0.0001053917996810839	'entropy': 0.002374502929986027}. Best is trial 141 with value: -6419.98779296875. [0m
[32m[I 2021-12-12 13:17:38	233] [0m Trial 194 finished with value: -5399.6171875 and parameters: {'r_scaling': 102.77305815007504	'unroll': 6	'update_epoch': 11	'discount': 0.9931301997973724	'lr': 0.00015958493155903206	'entropy': 0.027899532768359422}. Best is trial 141 with value: -6419.98779296875. [0m
[32m[I 2021-12-12 13:22:13	548] [0m Trial 195 finished with value: -5484.05078125 and parameters: {'r_scaling': 105.16245122950266	'unroll': 6	'update_epoch': 10	'discount': 0.9928257010610124	'lr': 0.000170220805285094	'entropy': 0.02735437912281799}. Best is trial 141 with value: -6419.98779296875. [0m
[32m[I 2021-12-12 13:27:42	870] [0m Trial 196 finished with value: -1818.273681640625 and parameters: {'r_scaling': 1.1947396442149116	'unroll': 6	'update_epoch': 10	'discount': 0.9883825800196461	'lr': 0.0001777481662591629	'entropy': 0.03758459702221566}. Best is trial 141 with value: -6419.98779296875. [0m
[32m[I 2021-12-12 13:33:13	116] [0m Trial 197 finished with value: -8197.85546875 and parameters: {'r_scaling': 0.15326190135785783	'unroll': 6	'update_epoch': 10	'discount': 0.9911419835536953	'lr': 0.0001670738484366127	'entropy': 0.020869875538521255}. Best is trial 197 with value: -8197.85546875. [0m
[32m[I 2021-12-12 13:38:42	926] [0m Trial 198 finished with value: -6334.787109375 and parameters: {'r_scaling': 0.1144404594034163	'unroll': 6	'update_epoch': 10	'discount': 0.9921505750354185	'lr': 0.00019148980006627883	'entropy': 0.02234652895095165}. Best is trial 197 with value: -8197.85546875. [0m
[32m[I 2021-12-12 13:43:17	760] [0m Trial 199 finished with value: -1170.818359375 and parameters: {'r_scaling': 0.10143829448435128	'unroll': 6	'update_epoch': 10	'discount': 0.950601399349412	'lr': 0.00019562224917340598	'entropy': 0.015441590921516526}. Best is trial 197 with value: -8197.85546875. [0m
