# Supplementary material
Source: ML conference proceedings conference paper supplement (https://proceedings.neurips.cc/paper_files/paper/2022/hash/10a6bdcabbd5a3d36b760daa295f63c1-Abstract.html)
Supplement: Supplementary file 1 [file 10a6bdcabbd5a3d36b760daa295f63c1-Supplemental-Conference.zip › neurips2022/code/robotics_code/hp_searches/humanoid_25M.log]

[32m[I 2022-01-11 08:05:54	460] [0m A new study created in memory with name: no-name-10ce0159-0afe-4f6a-a8ac-a94eb8264db6 [0m
[32m[I 2022-01-11 08:13:18	278] [0m Trial 0 finished with value: -1341.08349609375 and parameters: {'r_scaling': 2.669871669394481	'unroll': 3	'update_epoch': 13	'discount': 0.9495470052698102	'lr': 0.0005797769376102119	'entropy': 0.004662216517060695}. Best is trial 0 with value: -1341.08349609375. [0m
[32m[I 2022-01-11 08:18:38	758] [0m Trial 1 finished with value: -616.8092651367188 and parameters: {'r_scaling': 3.715035386636195	'unroll': 12	'update_epoch': 3	'discount': 0.9495980277962826	'lr': 0.0005764061629856404	'entropy': 0.0013542774889046855}. Best is trial 0 with value: -1341.08349609375. [0m
[32m[I 2022-01-11 08:25:59	754] [0m Trial 2 finished with value: -1015.4536743164062 and parameters: {'r_scaling': 164.89177482064815	'unroll': 2	'update_epoch': 9	'discount': 0.9728845791168934	'lr': 0.0003920048384308045	'entropy': 0.0006435111827110877}. Best is trial 0 with value: -1341.08349609375. [0m
[32m[I 2022-01-11 08:31:36	119] [0m Trial 3 finished with value: -696.8329467773438 and parameters: {'r_scaling': 1.2120712808347798	'unroll': 10	'update_epoch': 4	'discount': 0.9359711549849176	'lr': 0.0003913836607029713	'entropy': 0.00044000105926875335}. Best is trial 0 with value: -1341.08349609375. [0m
[32m[I 2022-01-11 08:39:01	917] [0m Trial 4 finished with value: -1404.778564453125 and parameters: {'r_scaling': 0.083338808231357	'unroll': 4	'update_epoch': 13	'discount': 0.9330580324169182	'lr': 0.00011667421225122312	'entropy': 0.00019657602586677284}. Best is trial 4 with value: -1404.778564453125. [0m
[32m[I 2022-01-11 08:44:32	060] [0m Trial 5 finished with value: -285.4734802246094 and parameters: {'r_scaling': 13.754880800881795	'unroll': 14	'update_epoch': 2	'discount': 0.9165377933838249	'lr': 0.0010762302813713846	'entropy': 0.0024436360682677486}. Best is trial 4 with value: -1404.778564453125. [0m
[32m[I 2022-01-11 08:50:32	459] [0m Trial 6 finished with value: -4897.4951171875 and parameters: {'r_scaling': 0.05895053403102607	'unroll': 10	'update_epoch': 7	'discount': 0.991532636331796	'lr': 0.0002699112322990366	'entropy': 0.0006141997362329893}. Best is trial 6 with value: -4897.4951171875. [0m
[32m[I 2022-01-11 08:57:36	362] [0m Trial 7 finished with value: -285.48089599609375 and parameters: {'r_scaling': 143.15924306131419	'unroll': 11	'update_epoch': 15	'discount': 0.9699096282651156	'lr': 0.0008988339619767145	'entropy': 0.04456707083323607}. Best is trial 6 with value: -4897.4951171875. [0m
[32m[I 2022-01-11 09:03:52	579] [0m Trial 8 finished with value: -528.38232421875 and parameters: {'r_scaling': 0.9469902916186034	'unroll': 1	'update_epoch': 3	'discount': 0.96912862735493	'lr': 0.0002433297147158972	'entropy': 0.00015053286002554735}. Best is trial 6 with value: -4897.4951171875. [0m
[32m[I 2022-01-11 09:09:54	542] [0m Trial 9 finished with value: -670.8746948242188 and parameters: {'r_scaling': 79.83598198510064	'unroll': 5	'update_epoch': 4	'discount': 0.9313597881145199	'lr': 0.0002633376951991001	'entropy': 0.0037711437881030774}. Best is trial 6 with value: -4897.4951171875. [0m
[32m[I 2022-01-11 09:16:36	689] [0m Trial 10 finished with value: -7459.09619140625 and parameters: {'r_scaling': 0.09320390439670807	'unroll': 7	'update_epoch': 8	'discount': 0.9945226331303206	'lr': 0.0001462758095603893	'entropy': 0.020225014684838803}. Best is trial 10 with value: -7459.09619140625. [0m
[32m[I 2022-01-11 09:23:38	596] [0m Trial 11 finished with value: -7178.39404296875 and parameters: {'r_scaling': 0.05215486127472419	'unroll': 7	'update_epoch': 8	'discount': 0.9940370221387662	'lr': 0.0001016843120191552	'entropy': 0.04479779275005765}. Best is trial 10 with value: -7459.09619140625. [0m
[32m[I 2022-01-11 09:30:30	151] [0m Trial 12 finished with value: -7851.640625 and parameters: {'r_scaling': 0.24042001280807948	'unroll': 7	'update_epoch': 8	'discount': 0.9934580435306423	'lr': 0.00011204742551513783	'entropy': 0.05468335891429592}. Best is trial 12 with value: -7851.640625. [0m
[32m[I 2022-01-11 09:37:46	885] [0m Trial 13 finished with value: -6524.08837890625 and parameters: {'r_scaling': 0.2979824894782414	'unroll': 7	'update_epoch': 10	'discount': 0.9818646200344784	'lr': 0.00015940175879846304	'entropy': 0.015246007623363216}. Best is trial 12 with value: -7851.640625. [0m
[32m[I 2022-01-11 09:44:33	020] [0m Trial 14 finished with value: -671.2681274414062 and parameters: {'r_scaling': 0.17979511756958247	'unroll': 6	'update_epoch': 6	'discount': 0.9600413930387245	'lr': 0.001953305361763072	'entropy': 0.0870136808997876}. Best is trial 12 with value: -7851.640625. [0m
[32m[I 2022-01-11 09:52:00	353] [0m Trial 15 finished with value: -1095.5909423828125 and parameters: {'r_scaling': 0.33827631620351534	'unroll': 9	'update_epoch': 11	'discount': 0.9044813897862831	'lr': 0.0001656714749611159	'entropy': 0.013199271399711422}. Best is trial 12 with value: -7851.640625. [0m
[32m[I 2022-01-11 09:58:04	435] [0m Trial 16 finished with value: -1361.1318359375 and parameters: {'r_scaling': 0.6262593360358759	'unroll': 8	'update_epoch': 6	'discount': 0.9832455658848132	'lr': 0.00015750149973750582	'entropy': 0.01360192054038151}. Best is trial 12 with value: -7851.640625. [0m
[32m[I 2022-01-11 10:05:13	352] [0m Trial 17 finished with value: -5533.82373046875 and parameters: {'r_scaling': 0.16324286483777922	'unroll': 15	'update_epoch': 12	'discount': 0.9831696186515758	'lr': 0.00018834909504266654	'entropy': 0.03333949069472724}. Best is trial 12 with value: -7851.640625. [0m
[32m[I 2022-01-11 10:12:36	204] [0m Trial 18 finished with value: -838.8135986328125 and parameters: {'r_scaling': 10.469330324292775	'unroll': 5	'update_epoch': 9	'discount': 0.960945635945504	'lr': 0.00012024260609073204	'entropy': 0.09867959796870598}. Best is trial 12 with value: -7851.640625. [0m
[32m[I 2022-01-11 10:18:33	186] [0m Trial 19 finished with value: -6709.4248046875 and parameters: {'r_scaling': 0.12230498499495182	'unroll': 8	'update_epoch': 5	'discount': 0.9942977253446227	'lr': 0.00021064203268640277	'entropy': 0.007205973583090058}. Best is trial 12 with value: -7851.640625. [0m
[32m[I 2022-01-11 10:25:15	090] [0m Trial 20 finished with value: -816.3026123046875 and parameters: {'r_scaling': 2.2002699720489702	'unroll': 13	'update_epoch': 8	'discount': 0.9599367692717885	'lr': 0.0001001242993784947	'entropy': 0.026064152695072146}. Best is trial 12 with value: -7851.640625. [0m
[32m[I 2022-01-11 10:32:27	986] [0m Trial 21 finished with value: -5875.087890625 and parameters: {'r_scaling': 0.06508815494936031	'unroll': 7	'update_epoch': 8	'discount': 0.9930590329048206	'lr': 0.00013172981490846633	'entropy': 0.052203043179729326}. Best is trial 12 with value: -7851.640625. [0m
[32m[I 2022-01-11 10:39:31	603] [0m Trial 22 finished with value: -3913.513916015625 and parameters: {'r_scaling': 0.05205870862666587	'unroll': 6	'update_epoch': 7	'discount': 0.9794031213713159	'lr': 0.00010238706345841678	'entropy': 0.024933783455343125}. Best is trial 12 with value: -7851.640625. [0m
[32m[I 2022-01-11 10:46:14	501] [0m Trial 23 finished with value: -7571.4658203125 and parameters: {'r_scaling': 0.31989670106898765	'unroll': 9	'update_epoch': 10	'discount': 0.9892680943966543	'lr': 0.0001358779061367293	'entropy': 0.05695036273930629}. Best is trial 12 with value: -7851.640625. [0m
[32m[I 2022-01-11 10:53:50	937] [0m Trial 24 finished with value: -1578.940185546875 and parameters: {'r_scaling': 0.3727911569145911	'unroll': 9	'update_epoch': 10	'discount': 0.9857953357786181	'lr': 0.0001379563804699089	'entropy': 0.008105042804970807}. Best is trial 12 with value: -7851.640625. [0m
[32m[I 2022-01-11 11:01:18	519] [0m Trial 25 finished with value: -5256.27197265625 and parameters: {'r_scaling': 0.5783791868128455	'unroll': 9	'update_epoch': 11	'discount': 0.9735384250090573	'lr': 0.0002098473459154903	'entropy': 0.07069174558462162}. Best is trial 12 with value: -7851.640625. [0m
[32m[I 2022-01-11 11:08:43	061] [0m Trial 26 finished with value: -7994.32177734375 and parameters: {'r_scaling': 0.1632084931204191	'unroll': 11	'update_epoch': 10	'discount': 0.9873446056675449	'lr': 0.000317222442927862	'entropy': 0.020776200365541873}. Best is trial 26 with value: -7994.32177734375. [0m
[32m[I 2022-01-11 11:15:59	678] [0m Trial 27 finished with value: -6208.01806640625 and parameters: {'r_scaling': 0.20215153986057258	'unroll': 12	'update_epoch': 10	'discount': 0.9785612089303265	'lr': 0.0003358881751365443	'entropy': 0.056507101884240706}. Best is trial 26 with value: -7994.32177734375. [0m
[32m[I 2022-01-11 11:24:03	755] [0m Trial 28 finished with value: -1924.84912109375 and parameters: {'r_scaling': 1.2620717267220596	'unroll': 11	'update_epoch': 15	'discount': 0.9641809286414664	'lr': 0.0004952288911429472	'entropy': 0.0066118499118829905}. Best is trial 26 with value: -7994.32177734375. [0m
[32m[I 2022-01-11 11:31:15	574] [0m Trial 29 finished with value: -320.12481689453125 and parameters: {'r_scaling': 5.644309213580349	'unroll': 10	'update_epoch': 13	'discount': 0.9557454850870112	'lr': 0.0008364092768023571	'entropy': 0.002212161925674602}. Best is trial 26 with value: -7994.32177734375. [0m
[32m[I 2022-01-11 11:39:30	988] [0m Trial 30 finished with value: -5436.23583984375 and parameters: {'r_scaling': 0.49414048582472997	'unroll': 3	'update_epoch': 12	'discount': 0.9882412033767127	'lr': 0.00033865663856956274	'entropy': 0.03718634376070218}. Best is trial 26 with value: -7994.32177734375. [0m
[32m[I 2022-01-11 11:46:38	361] [0m Trial 31 finished with value: -7657.21533203125 and parameters: {'r_scaling': 0.12256603975213229	'unroll': 8	'update_epoch': 9	'discount': 0.987351073464528	'lr': 0.00015163466708697517	'entropy': 0.01859336632152629}. Best is trial 26 with value: -7994.32177734375. [0m
[32m[I 2022-01-11 11:53:40	640] [0m Trial 32 finished with value: -5902.53759765625 and parameters: {'r_scaling': 0.21190157204368984	'unroll': 11	'update_epoch': 9	'discount': 0.9883801763329658	'lr': 0.00018717434956615916	'entropy': 0.020698005712200148}. Best is trial 26 with value: -7994.32177734375. [0m
[32m[I 2022-01-11 12:01:35	570] [0m Trial 33 finished with value: -8154.119140625 and parameters: {'r_scaling': 0.11520423351271873	'unroll': 12	'update_epoch': 11	'discount': 0.9751503552478623	'lr': 0.000630464197948554	'entropy': 0.008763850979003085}. Best is trial 33 with value: -8154.119140625. [0m
[32m[I 2022-01-11 12:08:16	535] [0m Trial 34 finished with value: -3672.64306640625 and parameters: {'r_scaling': 0.1441438049712508	'unroll': 13	'update_epoch': 11	'discount': 0.9759911554913092	'lr': 0.0006485769764512138	'entropy': 0.010342528330048234}. Best is trial 33 with value: -8154.119140625. [0m
[32m[I 2022-01-11 12:16:09	579] [0m Trial 35 finished with value: -1983.792236328125 and parameters: {'r_scaling': 0.09750328079495836	'unroll': 12	'update_epoch': 12	'discount': 0.9427842356015659	'lr': 0.0005525088193512242	'entropy': 0.0016305334571111347}. Best is trial 33 with value: -8154.119140625. [0m
[32m[I 2022-01-11 12:23:00	429] [0m Trial 36 finished with value: -558.91650390625 and parameters: {'r_scaling': 2.0677365929502853	'unroll': 15	'update_epoch': 9	'discount': 0.9692651989041612	'lr': 0.0006515346352381605	'entropy': 0.0045010059893014565}. Best is trial 33 with value: -8154.119140625. [0m
[32m[I 2022-01-11 12:29:48	238] [0m Trial 37 finished with value: -491.1659851074219 and parameters: {'r_scaling': 35.39802745295335	'unroll': 13	'update_epoch': 14	'discount': 0.9490976062941485	'lr': 0.00041839731743869776	'entropy': 0.009425207509662184}. Best is trial 33 with value: -8154.119140625. [0m
[32m[I 2022-01-11 12:36:30	270] [0m Trial 38 finished with value: -300.3807067871094 and parameters: {'r_scaling': 0.8650520308989756	'unroll': 10	'update_epoch': 7	'discount': 0.976052378878696	'lr': 0.0011874326977797292	'entropy': 0.005115252333622644}. Best is trial 33 with value: -8154.119140625. [0m
[32m[I 2022-01-11 12:42:19	134] [0m Trial 39 finished with value: -607.7460327148438 and parameters: {'r_scaling': 0.09445389167930926	'unroll': 14	'update_epoch': 1	'discount': 0.9230699830764213	'lr': 0.0003058705840251312	'entropy': 0.027893883879570442}. Best is trial 33 with value: -8154.119140625. [0m
[32m[I 2022-01-11 12:49:50	626] [0m Trial 40 finished with value: -5583.10205078125 and parameters: {'r_scaling': 0.2282282722482637	'unroll': 11	'update_epoch': 11	'discount': 0.985993735085379	'lr': 0.00076556837552393	'entropy': 0.016177610646739563}. Best is trial 33 with value: -8154.119140625. [0m
[32m[I 2022-01-11 12:57:28	213] [0m Trial 41 finished with value: -8200.3955078125 and parameters: {'r_scaling': 0.3030558557261639	'unroll': 9	'update_epoch': 10	'discount': 0.9882477799903902	'lr': 0.00012018176725551647	'entropy': 0.05664335688431908}. Best is trial 41 with value: -8200.3955078125. [0m
[32m[I 2022-01-11 13:04:47	432] [0m Trial 42 finished with value: -6441.607421875 and parameters: {'r_scaling': 0.12765982472465354	'unroll': 8	'update_epoch': 9	'discount': 0.9807081650490755	'lr': 0.00011447940778350531	'entropy': 0.04165899068027628}. Best is trial 41 with value: -8200.3955078125. [0m
[32m[I 2022-01-11 13:11:49	177] [0m Trial 43 finished with value: -5579.38525390625 and parameters: {'r_scaling': 0.492820745676624	'unroll': 10	'update_epoch': 10	'discount': 0.9888033985809355	'lr': 0.00022866872140457308	'entropy': 0.020186076003937698}. Best is trial 41 with value: -8200.3955078125. [0m
[32m[I 2022-01-11 13:18:41	044] [0m Trial 44 finished with value: -323.1242370605469 and parameters: {'r_scaling': 0.06885367664026792	'unroll': 8	'update_epoch': 7	'discount': 0.9712082946058468	'lr': 0.0010785966149422354	'entropy': 0.00034053842986519534}. Best is trial 41 with value: -8200.3955078125. [0m
[32m[I 2022-01-11 13:26:27	840] [0m Trial 45 finished with value: -6568.5302734375 and parameters: {'r_scaling': 0.23340242455478083	'unroll': 6	'update_epoch': 9	'discount': 0.9849841409128217	'lr': 0.00017984869262269653	'entropy': 0.032185864830143684}. Best is trial 41 with value: -8200.3955078125. [0m
[32m[I 2022-01-11 13:34:02	434] [0m Trial 46 finished with value: -788.3102416992188 and parameters: {'r_scaling': 0.11368551036371864	'unroll': 11	'update_epoch': 12	'discount': 0.9660977257842083	'lr': 0.00048602176588878637	'entropy': 0.06744836061203201}. Best is trial 41 with value: -8200.3955078125. [0m
[32m[I 2022-01-11 13:42:08	509] [0m Trial 47 finished with value: -3425.587890625 and parameters: {'r_scaling': 0.737648025618824	'unroll': 5	'update_epoch': 14	'discount': 0.9774966812410345	'lr': 0.00012504156442585748	'entropy': 0.002998243702196713}. Best is trial 41 with value: -8200.3955078125. [0m
[32m[I 2022-01-11 13:49:02	472] [0m Trial 48 finished with value: -571.4058227539062 and parameters: {'r_scaling': 0.39039268439123187	'unroll': 10	'update_epoch': 8	'discount': 0.9898961962657853	'lr': 0.0003701722698431347	'entropy': 0.010482096649994832}. Best is trial 41 with value: -8200.3955078125. [0m
[32m[I 2022-01-11 13:55:53	759] [0m Trial 49 finished with value: -694.0409545898438 and parameters: {'r_scaling': 1.4073629541602695	'unroll': 12	'update_epoch': 6	'discount': 0.9819800668463304	'lr': 0.00027884063757992167	'entropy': 0.0008949676491473387}. Best is trial 41 with value: -8200.3955078125. [0m
[32m[I 2022-01-11 14:03:15	589] [0m Trial 50 finished with value: -6879.49462890625 and parameters: {'r_scaling': 0.08529136107868084	'unroll': 9	'update_epoch': 11	'discount': 0.9947604816884237	'lr': 0.00015336357787228586	'entropy': 0.019097276622182975}. Best is trial 41 with value: -8200.3955078125. [0m
[32m[I 2022-01-11 14:09:58	148] [0m Trial 51 finished with value: -8851.7880859375 and parameters: {'r_scaling': 0.2829138958990585	'unroll': 9	'update_epoch': 10	'discount': 0.9904584824555973	'lr': 0.00014083110955089882	'entropy': 0.06624243439417306}. Best is trial 51 with value: -8851.7880859375. [0m
[32m[I 2022-01-11 14:17:28	184] [0m Trial 52 finished with value: -8546.251953125 and parameters: {'r_scaling': 0.2744412251105053	'unroll': 7	'update_epoch': 10	'discount': 0.9909004974614171	'lr': 0.00011010421202150247	'entropy': 0.07506971478603386}. Best is trial 51 with value: -8851.7880859375. [0m
[32m[I 2022-01-11 14:24:43	754] [0m Trial 53 finished with value: -6341.14599609375 and parameters: {'r_scaling': 0.25759715876960765	'unroll': 7	'update_epoch': 10	'discount': 0.9840053487730055	'lr': 0.00011335942859415425	'entropy': 0.08209962534488004}. Best is trial 51 with value: -8851.7880859375. [0m
[32m[I 2022-01-11 14:32:41	218] [0m Trial 54 finished with value: -5040.28125 and parameters: {'r_scaling': 0.1644621423166495	'unroll': 4	'update_epoch': 13	'discount': 0.9911438916655999	'lr': 0.00011240457866942976	'entropy': 0.09424191172487298}. Best is trial 51 with value: -8851.7880859375. [0m
[32m[I 2022-01-11 14:40:19	934] [0m Trial 55 finished with value: -8031.51953125 and parameters: {'r_scaling': 0.4166527428079611	'unroll': 6	'update_epoch': 11	'discount': 0.9916478775787821	'lr': 0.00017361929239506348	'entropy': 0.04744915005170598}. Best is trial 51 with value: -8851.7880859375. [0m
[32m[I 2022-01-11 14:47:48	822] [0m Trial 56 finished with value: -1462.439697265625 and parameters: {'r_scaling': 3.9298352532112877	'unroll': 6	'update_epoch': 11	'discount': 0.9806782141945118	'lr': 0.00016346507868638608	'entropy': 0.04218736183041358}. Best is trial 51 with value: -8851.7880859375. [0m
[32m[I 2022-01-11 14:54:57	878] [0m Trial 57 finished with value: -7164.0478515625 and parameters: {'r_scaling': 0.4710102817550063	'unroll': 4	'update_epoch': 12	'discount': 0.9908332927808611	'lr': 0.00024700999203700074	'entropy': 0.07191363493443247}. Best is trial 51 with value: -8851.7880859375. [0m
[32m[I 2022-01-11 15:01:35	960] [0m Trial 58 finished with value: -1131.3665771484375 and parameters: {'r_scaling': 1.020448461200999	'unroll': 9	'update_epoch': 11	'discount': 0.9018506723607694	'lr': 0.00020944523479521238	'entropy': 0.05234559444525454}. Best is trial 51 with value: -8851.7880859375. [0m
[32m[I 2022-01-11 15:08:18	993] [0m Trial 59 finished with value: -5199.32177734375 and parameters: {'r_scaling': 0.32973335543412524	'unroll': 12	'update_epoch': 10	'discount': 0.9742480115103066	'lr': 0.00013723583627714376	'entropy': 0.029528078427782177}. Best is trial 51 with value: -8851.7880859375. [0m
[32m[I 2022-01-11 15:14:39	633] [0m Trial 60 finished with value: -512.0596313476562 and parameters: {'r_scaling': 0.17311716748637762	'unroll': 6	'update_epoch': 10	'discount': 0.940870374339664	'lr': 0.0014194796598730323	'entropy': 0.06559683496426795}. Best is trial 51 with value: -8851.7880859375. [0m
[32m[I 2022-01-11 15:21:05	363] [0m Trial 61 finished with value: -7650.86376953125 and parameters: {'r_scaling': 0.2584886241151669	'unroll': 7	'update_epoch': 8	'discount': 0.9948397992409238	'lr': 0.00010992524495062725	'entropy': 0.05188484149930002}. Best is trial 51 with value: -8851.7880859375. [0m
[32m[I 2022-01-11 15:27:26	575] [0m Trial 62 finished with value: -7192.44287109375 and parameters: {'r_scaling': 0.40737295629863385	'unroll': 7	'update_epoch': 12	'discount': 0.9913695029316152	'lr': 0.00010136150962021808	'entropy': 0.03769564636782985}. Best is trial 51 with value: -8851.7880859375. [0m
[32m[I 2022-01-11 15:33:55	368] [0m Trial 63 finished with value: -6006.166015625 and parameters: {'r_scaling': 0.6948270518754133	'unroll': 5	'update_epoch': 9	'discount': 0.9848147572492448	'lr': 0.0001232362891715685	'entropy': 0.08390557440760561}. Best is trial 51 with value: -8851.7880859375. [0m
[32m[I 2022-01-11 15:39:59	028] [0m Trial 64 finished with value: -3673.827392578125 and parameters: {'r_scaling': 0.0762117457392543	'unroll': 8	'update_epoch': 8	'discount': 0.9921772586428055	'lr': 0.00013915975930421033	'entropy': 0.09880349447114921}. Best is trial 51 with value: -8851.7880859375. [0m
[32m[I 2022-01-11 15:46:54	969] [0m Trial 65 finished with value: -7338.05712890625 and parameters: {'r_scaling': 0.30701257283041444	'unroll': 7	'update_epoch': 11	'discount': 0.9865847236777697	'lr': 0.0001744079777646214	'entropy': 0.024309685998817575}. Best is trial 51 with value: -8851.7880859375. [0m
[32m[I 2022-01-11 15:53:48	004] [0m Trial 66 finished with value: -8835.900390625 and parameters: {'r_scaling': 0.6148665559024463	'unroll': 5	'update_epoch': 10	'discount': 0.9795275285537429	'lr': 0.00012927902416185908	'entropy': 0.04755257199328355}. Best is trial 51 with value: -8851.7880859375. [0m
[32m[I 2022-01-11 16:02:15	914] [0m Trial 67 finished with value: -4117.98046875 and parameters: {'r_scaling': 1.4265303866868921	'unroll': 1	'update_epoch': 10	'discount': 0.9808701424544471	'lr': 0.0001279509674381913	'entropy': 0.047680139398206915}. Best is trial 51 with value: -8851.7880859375. [0m
[32m[I 2022-01-11 16:09:48	277] [0m Trial 68 finished with value: -4067.895263671875 and parameters: {'r_scaling': 0.6052410386192396	'unroll': 3	'update_epoch': 11	'discount': 0.977840741549254	'lr': 0.00014774395231689338	'entropy': 0.032902401783232525}. Best is trial 51 with value: -8851.7880859375. [0m
[32m[I 2022-01-11 16:16:58	987] [0m Trial 69 finished with value: -492.2978515625 and parameters: {'r_scaling': 0.17892889368309503	'unroll': 4	'update_epoch': 10	'discount': 0.9105311816960653	'lr': 0.0002017054077666406	'entropy': 0.06334652430144479}. Best is trial 51 with value: -8851.7880859375. [0m
[32m[I 2022-01-11 16:24:05	909] [0m Trial 70 finished with value: -1728.505126953125 and parameters: {'r_scaling': 0.14742151365356337	'unroll': 5	'update_epoch': 12	'discount': 0.9565532524346322	'lr': 0.0001696078279179263	'entropy': 0.01264823582337824}. Best is trial 51 with value: -8851.7880859375. [0m
[32m[I 2022-01-11 16:30:38	636] [0m Trial 71 finished with value: -6720.0029296875 and parameters: {'r_scaling': 0.4181496811082826	'unroll': 6	'update_epoch': 9	'discount': 0.9833169600879673	'lr': 0.00010661178456071694	'entropy': 0.04274706088638478}. Best is trial 51 with value: -8851.7880859375. [0m
[32m[I 2022-01-11 16:37:02	527] [0m Trial 72 finished with value: -7377.62646484375 and parameters: {'r_scaling': 0.2776829020646414	'unroll': 8	'update_epoch': 9	'discount': 0.9881308030955127	'lr': 0.00012164815010425461	'entropy': 0.057743969958913774}. Best is trial 51 with value: -8851.7880859375. [0m
[32m[I 2022-01-11 16:43:50	659] [0m Trial 73 finished with value: -7565.27783203125 and parameters: {'r_scaling': 0.19854615260237438	'unroll': 5	'update_epoch': 10	'discount': 0.9921469380616802	'lr': 0.000143898901773363	'entropy': 0.07986711918142872}. Best is trial 51 with value: -8851.7880859375. [0m
[32m[I 2022-01-11 16:49:54	834] [0m Trial 74 finished with value: -2028.5352783203125 and parameters: {'r_scaling': 0.11528873950588257	'unroll': 14	'update_epoch': 11	'discount': 0.9731244244989296	'lr': 0.0006646643993602631	'entropy': 0.025180862739708702}. Best is trial 51 with value: -8851.7880859375. [0m
[32m[I 2022-01-11 16:56:35	558] [0m Trial 75 finished with value: -3926.575927734375 and parameters: {'r_scaling': 0.8596515119764628	'unroll': 9	'update_epoch': 10	'discount': 0.9867784615773355	'lr': 0.0001308082750175224	'entropy': 0.03444861534938789}. Best is trial 51 with value: -8851.7880859375. [0m
[32m[I 2022-01-11 17:02:46	350] [0m Trial 76 finished with value: -1182.9320068359375 and parameters: {'r_scaling': 0.537557627163591	'unroll': 7	'update_epoch': 7	'discount': 0.9297726915954508	'lr': 0.00011928508270788256	'entropy': 0.04963419057715282}. Best is trial 51 with value: -8851.7880859375. [0m
[32m[I 2022-01-11 17:08:39	001] [0m Trial 77 finished with value: -2630.3515625 and parameters: {'r_scaling': 0.3334997987643814	'unroll': 10	'update_epoch': 8	'discount': 0.994933705242848	'lr': 0.00015851630157573372	'entropy': 0.01564480066251664}. Best is trial 51 with value: -8851.7880859375. [0m
[32m[I 2022-01-11 17:14:34	130] [0m Trial 78 finished with value: -903.2642211914062 and parameters: {'r_scaling': 0.050589773502092136	'unroll': 13	'update_epoch': 9	'discount': 0.9790191217435263	'lr': 0.00018782743128567585	'entropy': 0.07158074918250736}. Best is trial 51 with value: -8851.7880859375. [0m
[32m[I 2022-01-11 17:21:18	944] [0m Trial 79 finished with value: -5731.6328125 and parameters: {'r_scaling': 21.055358343663208	'unroll': 11	'update_epoch': 13	'discount': 0.9893653894642098	'lr': 0.00045705005828755634	'entropy': 0.022679215712946028}. Best is trial 51 with value: -8851.7880859375. [0m
[32m[I 2022-01-11 17:27:59	923] [0m Trial 80 finished with value: -7483.7294921875 and parameters: {'r_scaling': 0.21672528406498606	'unroll': 12	'update_epoch': 11	'discount': 0.9829363644808481	'lr': 0.00010105199545649879	'entropy': 0.03973671841665169}. Best is trial 51 with value: -8851.7880859375. [0m
[32m[I 2022-01-11 17:34:22	081] [0m Trial 81 finished with value: -3650.720703125 and parameters: {'r_scaling': 0.1296583655813894	'unroll': 8	'update_epoch': 9	'discount': 0.9862010920941242	'lr': 0.00014920361282121677	'entropy': 0.006188359660198671}. Best is trial 51 with value: -8851.7880859375. [0m
[32m[I 2022-01-11 17:40:55	232] [0m Trial 82 finished with value: -1421.4434814453125 and parameters: {'r_scaling': 190.97072294081855	'unroll': 8	'update_epoch': 10	'discount': 0.988594661077083	'lr': 0.0001318432276396778	'entropy': 0.028215864670441702}. Best is trial 51 with value: -8851.7880859375. [0m
[32m[I 2022-01-11 17:47:31	269] [0m Trial 83 finished with value: -6678.8369140625 and parameters: {'r_scaling': 0.1041568152115979	'unroll': 9	'update_epoch': 8	'discount': 0.9922651777095658	'lr': 0.00011610773163148438	'entropy': 0.017093678863092238}. Best is trial 51 with value: -8851.7880859375. [0m
[32m[I 2022-01-11 17:54:17	164] [0m Trial 84 finished with value: -1472.9150390625 and parameters: {'r_scaling': 111.77677109569164	'unroll': 6	'update_epoch': 10	'discount': 0.9845425721190262	'lr': 0.0006043777623322886	'entropy': 0.060040508816903086}. Best is trial 51 with value: -8851.7880859375. [0m
[32m[I 2022-01-11 18:00:50	450] [0m Trial 85 finished with value: -2367.298583984375 and parameters: {'r_scaling': 0.06534890099368416	'unroll': 8	'update_epoch': 9	'discount': 0.987478200081135	'lr': 0.00015722138644855683	'entropy': 0.07980063499672134}. Best is trial 51 with value: -8851.7880859375. [0m
[32m[I 2022-01-11 18:07:33	429] [0m Trial 86 finished with value: -4970.24951171875 and parameters: {'r_scaling': 0.14209486198434593	'unroll': 7	'update_epoch': 11	'discount': 0.9766163355145744	'lr': 0.00023698541058252715	'entropy': 0.013231365687160114}. Best is trial 51 with value: -8851.7880859375. [0m
[32m[I 2022-01-11 18:14:20	911] [0m Trial 87 finished with value: -4870.94140625 and parameters: {'r_scaling': 0.26649971081789914	'unroll': 6	'update_epoch': 9	'discount': 0.9902721025444282	'lr': 0.0007718668286071373	'entropy': 0.04604235958513482}. Best is trial 51 with value: -8851.7880859375. [0m
[32m[I 2022-01-11 18:21:22	617] [0m Trial 88 finished with value: -796.09814453125 and parameters: {'r_scaling': 0.09218202829668279	'unroll': 9	'update_epoch': 12	'discount': 0.9823156543376353	'lr': 0.0005505576319555646	'entropy': 0.0001128494072226812}. Best is trial 51 with value: -8851.7880859375. [0m
[32m[I 2022-01-11 18:27:50	812] [0m Trial 89 finished with value: -7502.3896484375 and parameters: {'r_scaling': 0.18616988812549712	'unroll': 10	'update_epoch': 10	'discount': 0.9804978092331726	'lr': 0.00014465212072261926	'entropy': 0.03250590126397696}. Best is trial 51 with value: -8851.7880859375. [0m
[32m[I 2022-01-11 18:34:34	930] [0m Trial 90 finished with value: -2979.280517578125 and parameters: {'r_scaling': 0.23766701477262905	'unroll': 5	'update_epoch': 8	'discount': 0.9663867799187218	'lr': 0.00010648205686242573	'entropy': 0.012011231742334655}. Best is trial 51 with value: -8851.7880859375. [0m
[32m[I 2022-01-11 18:40:58	152] [0m Trial 91 finished with value: -2439.627685546875 and parameters: {'r_scaling': 0.3846069656937363	'unroll': 7	'update_epoch': 7	'discount': 0.9937033183462282	'lr': 0.00011186598915127658	'entropy': 0.053229503356992024}. Best is trial 51 with value: -8851.7880859375. [0m
[32m[I 2022-01-11 18:47:23	300] [0m Trial 92 finished with value: -7201.181640625 and parameters: {'r_scaling': 0.24747020919181548	'unroll': 7	'update_epoch': 8	'discount': 0.9931079614656365	'lr': 0.00010849126916177695	'entropy': 0.037921825481519074}. Best is trial 51 with value: -8851.7880859375. [0m
[32m[I 2022-01-11 18:53:40	867] [0m Trial 93 finished with value: -6455.77294921875 and parameters: {'r_scaling': 0.4758495256822253	'unroll': 8	'update_epoch': 9	'discount': 0.9901969021803968	'lr': 0.00012352528400900428	'entropy': 0.053772522234487315}. Best is trial 51 with value: -8851.7880859375. [0m
[32m[I 2022-01-11 18:59:58	999] [0m Trial 94 finished with value: -4282.15966796875 and parameters: {'r_scaling': 0.15514975599391426	'unroll': 7	'update_epoch': 6	'discount': 0.9867561810222322	'lr': 0.00013030888680070688	'entropy': 0.0077846836403505934}. Best is trial 51 with value: -8851.7880859375. [0m
[32m[I 2022-01-11 19:06:48	450] [0m Trial 95 finished with value: -7002.1796875 and parameters: {'r_scaling': 0.29307586287285875	'unroll': 6	'update_epoch': 11	'discount': 0.994254370409796	'lr': 0.00029867912862191416	'entropy': 0.07023640018008145}. Best is trial 51 with value: -8851.7880859375. [0m
[32m[I 2022-01-11 19:13:20	152] [0m Trial 96 finished with value: -7615.49560546875 and parameters: {'r_scaling': 0.07856125116505872	'unroll': 7	'update_epoch': 10	'discount': 0.9907868792334242	'lr': 0.00013629580972441925	'entropy': 0.019110520279436525}. Best is trial 51 with value: -8851.7880859375. [0m
[32m[I 2022-01-11 19:19:30	056] [0m Trial 97 finished with value: -6650.74609375 and parameters: {'r_scaling': 0.3513570446575359	'unroll': 6	'update_epoch': 7	'discount': 0.9851597673837771	'lr': 0.00017938520737496353	'entropy': 0.04767304037005876}. Best is trial 51 with value: -8851.7880859375. [0m
[32m[I 2022-01-11 19:26:01	594] [0m Trial 98 finished with value: -1692.714599609375 and parameters: {'r_scaling': 0.7141326998920348	'unroll': 9	'update_epoch': 8	'discount': 0.971088607242943	'lr': 0.0009370321970787104	'entropy': 0.09200667382133841}. Best is trial 51 with value: -8851.7880859375. [0m
[32m[I 2022-01-11 19:32:34	581] [0m Trial 99 finished with value: -1433.538330078125 and parameters: {'r_scaling': 0.2049621126882703	'unroll': 8	'update_epoch': 9	'discount': 0.9890009142381078	'lr': 0.00011637060338513333	'entropy': 0.009111078266134283}. Best is trial 51 with value: -8851.7880859375. [0m
[32m[I 2022-01-11 19:38:58	746] [0m Trial 100 finished with value: -1575.2861328125 and parameters: {'r_scaling': 0.12024234127710853	'unroll': 10	'update_epoch': 10	'discount': 0.9743873945094397	'lr': 0.0004137414930168235	'entropy': 0.06377883789150336}. Best is trial 51 with value: -8851.7880859375. [0m
[32m[I 2022-01-11 19:45:51	069] [0m Trial 101 finished with value: -8041.47998046875 and parameters: {'r_scaling': 0.0798453844152608	'unroll': 7	'update_epoch': 10	'discount': 0.9918204955227721	'lr': 0.0001395084011901951	'entropy': 0.0196456867383525}. Best is trial 51 with value: -8851.7880859375. [0m
[32m[I 2022-01-11 19:52:46	049] [0m Trial 102 finished with value: -6642.6474609375 and parameters: {'r_scaling': 0.06255740959736296	'unroll': 6	'update_epoch': 11	'discount': 0.9918600904157756	'lr': 0.00017046082406875257	'entropy': 0.02227583141052992}. Best is trial 51 with value: -8851.7880859375. [0m
[32m[I 2022-01-11 19:59:13	159] [0m Trial 103 finished with value: -6625.94921875 and parameters: {'r_scaling': 0.09800002736527129	'unroll': 11	'update_epoch': 10	'discount': 0.9940179465571891	'lr': 0.00010833334344697295	'entropy': 0.028034786633807193}. Best is trial 51 with value: -8851.7880859375. [0m
[32m[I 2022-01-11 20:05:42	521] [0m Trial 104 finished with value: -7939.97509765625 and parameters: {'r_scaling': 0.16104191116695668	'unroll': 7	'update_epoch': 9	'discount': 0.9877631514663217	'lr': 0.0001509940694296208	'entropy': 0.03703632890243207}. Best is trial 51 with value: -8851.7880859375. [0m
[32m[I 2022-01-11 20:12:02	830] [0m Trial 105 finished with value: -7382.2060546875 and parameters: {'r_scaling': 0.1390682378711797	'unroll': 8	'update_epoch': 10	'discount': 0.9836309184286606	'lr': 0.00015265980162433145	'entropy': 0.03660164143477557}. Best is trial 51 with value: -8851.7880859375. [0m
[32m[I 2022-01-11 20:18:40	327] [0m Trial 106 finished with value: -7716.51416015625 and parameters: {'r_scaling': 0.17798204052406028	'unroll': 9	'update_epoch': 9	'discount': 0.9875150840226414	'lr': 0.00014069501651513307	'entropy': 0.017253296379979865}. Best is trial 51 with value: -8851.7880859375. [0m
[32m[I 2022-01-11 20:25:40	817] [0m Trial 107 finished with value: -8453.7646484375 and parameters: {'r_scaling': 0.1781296535586534	'unroll': 9	'update_epoch': 11	'discount': 0.9820762251783857	'lr': 0.00019722501684821646	'entropy': 0.014845376345915755}. Best is trial 51 with value: -8851.7880859375. [0m
[32m[I 2022-01-11 20:31:35	848] [0m Trial 108 finished with value: -832.1572875976562 and parameters: {'r_scaling': 8.534895564554736	'unroll': 13	'update_epoch': 3	'discount': 0.9801323902066477	'lr': 0.00020160073709426046	'entropy': 0.014528610263579524}. Best is trial 51 with value: -8851.7880859375. [0m
[32m[I 2022-01-11 20:38:40	570] [0m Trial 109 finished with value: -8111.45751953125 and parameters: {'r_scaling': 0.4420563495856496	'unroll': 5	'update_epoch': 12	'discount': 0.9786240486540845	'lr': 0.0001264542102728198	'entropy': 0.0410232717350266}. Best is trial 51 with value: -8851.7880859375. [0m
[32m[I 2022-01-11 20:45:59	301] [0m Trial 110 finished with value: -3004.585205078125 and parameters: {'r_scaling': 0.5407348756912757	'unroll': 4	'update_epoch': 12	'discount': 0.9774508357395281	'lr': 0.00022504332577694765	'entropy': 0.01083427883639681}. Best is trial 51 with value: -8851.7880859375. [0m
[32m[I 2022-01-11 20:52:54	820] [0m Trial 111 finished with value: -7663.35986328125 and parameters: {'r_scaling': 0.32624329620751386	'unroll': 5	'update_epoch': 11	'discount': 0.9819109366975257	'lr': 0.0001646401328424423	'entropy': 0.04507412356257844}. Best is trial 51 with value: -8851.7880859375. [0m
[32m[I 2022-01-11 21:00:11	164] [0m Trial 112 finished with value: -8031.822265625 and parameters: {'r_scaling': 0.41709959981012024	'unroll': 5	'update_epoch': 12	'discount': 0.9855920220401152	'lr': 0.0002601821338282648	'entropy': 0.031114604920217625}. Best is trial 51 with value: -8851.7880859375. [0m
[32m[I 2022-01-11 21:07:21	398] [0m Trial 113 finished with value: -4422.6357421875 and parameters: {'r_scaling': 0.43404188576914554	'unroll': 5	'update_epoch': 13	'discount': 0.9791180564730411	'lr': 0.0003473077927894398	'entropy': 0.030352057121141383}. Best is trial 51 with value: -8851.7880859375. [0m
[32m[I 2022-01-11 21:14:55	550] [0m Trial 114 finished with value: -4635.30615234375 and parameters: {'r_scaling': 0.9578555318001538	'unroll': 4	'update_epoch': 12	'discount': 0.9850127313923829	'lr': 0.00018635025903399643	'entropy': 0.024977349656782995}. Best is trial 51 with value: -8851.7880859375. [0m
[32m[I 2022-01-11 21:22:07	916] [0m Trial 115 finished with value: -4480.56494140625 and parameters: {'r_scaling': 0.6446870647522649	'unroll': 5	'update_epoch': 11	'discount': 0.9758173289499568	'lr': 0.00019828252618369884	'entropy': 0.021692775424852057}. Best is trial 51 with value: -8851.7880859375. [0m
[32m[I 2022-01-11 21:29:31	432] [0m Trial 116 finished with value: -6784.8349609375 and parameters: {'r_scaling': 0.2174829199173217	'unroll': 6	'update_epoch': 13	'discount': 0.9826452355661282	'lr': 0.00026248948174567636	'entropy': 0.039481930791707524}. Best is trial 51 with value: -8851.7880859375. [0m
[32m[I 2022-01-11 21:37:27	257] [0m Trial 117 finished with value: -5094.970703125 and parameters: {'r_scaling': 0.287463321744368	'unroll': 3	'update_epoch': 12	'discount': 0.9894838433209471	'lr': 0.0003729852949176598	'entropy': 0.03395481371731436}. Best is trial 51 with value: -8851.7880859375. [0m
[32m[I 2022-01-11 21:46:12	196] [0m Trial 118 finished with value: -7700.2373046875 and parameters: {'r_scaling': 0.1620318767098872	'unroll': 5	'update_epoch': 11	'discount': 0.9853415217246833	'lr': 0.0001624130700490549	'entropy': 0.02657246000523665}. Best is trial 51 with value: -8851.7880859375. [0m
[32m[I 2022-01-11 21:53:05	448] [0m Trial 119 finished with value: -7768.853515625 and parameters: {'r_scaling': 0.3887721504088175	'unroll': 12	'update_epoch': 11	'discount': 0.9876194644242375	'lr': 0.00031226112422868483	'entropy': 0.07688663764787154}. Best is trial 51 with value: -8851.7880859375. [0m
[32m[I 2022-01-11 22:00:04	564] [0m Trial 120 finished with value: -1224.95263671875 and parameters: {'r_scaling': 0.07725456419679745	'unroll': 11	'update_epoch': 12	'discount': 0.9716598282270807	'lr': 0.00022259706506395867	'entropy': 0.05881288806198625}. Best is trial 51 with value: -8851.7880859375. [0m
[32m[I 2022-01-11 22:07:12	940] [0m Trial 121 finished with value: -8346.833984375 and parameters: {'r_scaling': 0.24047487214951585	'unroll': 6	'update_epoch': 10	'discount': 0.9921736143918339	'lr': 0.00012548091536366236	'entropy': 0.04477808118629639}. Best is trial 51 with value: -8851.7880859375. [0m
[32m[I 2022-01-11 22:14:22	853] [0m Trial 122 finished with value: -8014.33349609375 and parameters: {'r_scaling': 0.3363948562661793	'unroll': 6	'update_epoch': 10	'discount': 0.9922437361658294	'lr': 0.00012761710456741162	'entropy': 0.04127229346766619}. Best is trial 51 with value: -8851.7880859375. [0m
[32m[I 2022-01-11 22:24:24	344] [0m Trial 123 finished with value: -7397.31591796875 and parameters: {'r_scaling': 0.47732602269121505	'unroll': 6	'update_epoch': 10	'discount': 0.9916129447169084	'lr': 0.00012715829396746774	'entropy': 0.0435436910579532}. Best is trial 51 with value: -8851.7880859375. [0m
[32m[I 2022-01-11 22:34:29	814] [0m Trial 124 finished with value: -7799.517578125 and parameters: {'r_scaling': 0.347365546513724	'unroll': 5	'update_epoch': 11	'discount': 0.990128667231112	'lr': 0.00012117743488270563	'entropy': 0.030985033023129077}. Best is trial 51 with value: -8851.7880859375. [0m
[32m[I 2022-01-11 22:41:30	741] [0m Trial 125 finished with value: -4970.185546875 and parameters: {'r_scaling': 0.597431566585447	'unroll': 6	'update_epoch': 10	'discount': 0.9926765010444213	'lr': 0.0002547819093831837	'entropy': 0.04983053600328087}. Best is trial 51 with value: -8851.7880859375. [0m
[32m[I 2022-01-11 22:49:24	901] [0m Trial 126 finished with value: -5878.02294921875 and parameters: {'r_scaling': 0.2676847008770609	'unroll': 5	'update_epoch': 14	'discount': 0.9843859275686918	'lr': 0.00013628935754043576	'entropy': 0.06240382677711989}. Best is trial 51 with value: -8851.7880859375. [0m
[32m[I 2022-01-11 22:56:14	363] [0m Trial 127 finished with value: -1959.8140869140625 and parameters: {'r_scaling': 0.8014782026516688	'unroll': 4	'update_epoch': 11	'discount': 0.952059864313565	'lr': 0.00013047982372449914	'entropy': 0.00221828531634239}. Best is trial 51 with value: -8851.7880859375. [0m
[32m[I 2022-01-11 23:07:09	190] [0m Trial 128 finished with value: -2746.6611328125 and parameters: {'r_scaling': 0.4388830314320506	'unroll': 6	'update_epoch': 12	'discount': 0.9813945841000671	'lr': 0.00029180955445167345	'entropy': 0.019853348782535783}. Best is trial 51 with value: -8851.7880859375. [0m
[32m[I 2022-01-11 23:14:16	754] [0m Trial 129 finished with value: -6380.986328125 and parameters: {'r_scaling': 0.24040014392184547	'unroll': 6	'update_epoch': 10	'discount': 0.9861056280417629	'lr': 0.00011839649281123587	'entropy': 0.04194700441173483}. Best is trial 51 with value: -8851.7880859375. [0m
[32m[I 2022-01-11 23:21:41	439] [0m Trial 130 finished with value: -299.71221923828125 and parameters: {'r_scaling': 0.2027347705566354	'unroll': 4	'update_epoch': 11	'discount': 0.9679823845494833	'lr': 0.0019256233385499767	'entropy': 0.0032594349463243868}. Best is trial 51 with value: -8851.7880859375. [0m
[32m[I 2022-01-11 23:32:26	526] [0m Trial 131 finished with value: -7197.35791015625 and parameters: {'r_scaling': 0.1084687925589966	'unroll': 7	'update_epoch': 10	'discount': 0.9885537400647226	'lr': 0.00014438143720314943	'entropy': 0.03435011670948381}. Best is trial 51 with value: -8851.7880859375. [0m
[32m[I 2022-01-11 23:39:23	923] [0m Trial 132 finished with value: -6808.9091796875 and parameters: {'r_scaling': 0.3048831749353868	'unroll': 7	'update_epoch': 10	'discount': 0.991249936734819	'lr': 0.00015070981419562478	'entropy': 0.03763649154336058}. Best is trial 51 with value: -8851.7880859375. [0m
[32m[I 2022-01-11 23:50:10	959] [0m Trial 133 finished with value: -7275.9228515625 and parameters: {'r_scaling': 0.16583401249507893	'unroll': 6	'update_epoch': 9	'discount': 0.9876359489432979	'lr': 0.00013848696877765201	'entropy': 0.05603855353653969}. Best is trial 51 with value: -8851.7880859375. [0m
[32m[I 2022-01-11 23:57:18	458] [0m Trial 134 finished with value: -8562.2470703125 and parameters: {'r_scaling': 0.367797387106243	'unroll': 7	'update_epoch': 10	'discount': 0.983342713560791	'lr': 0.00017789266880521674	'entropy': 0.023506199533686444}. Best is trial 51 with value: -8851.7880859375. [0m
[32m[I 2022-01-12 00:04:56	588] [0m Trial 135 finished with value: -5619.97705078125 and parameters: {'r_scaling': 0.37162721326759984	'unroll': 5	'update_epoch': 11	'discount': 0.97919249738221	'lr': 0.00017599847021153826	'entropy': 0.0243615497642869}. Best is trial 51 with value: -8851.7880859375. [0m
[32m[I 2022-01-12 00:17:18	919] [0m Trial 136 finished with value: -6872.6240234375 and parameters: {'r_scaling': 0.4957072634042716	'unroll': 2	'update_epoch': 10	'discount': 0.9832037014008199	'lr': 0.00012379372554625478	'entropy': 0.018052118072265595}. Best is trial 51 with value: -8851.7880859375. [0m
[32m[I 2022-01-12 00:24:17	812] [0m Trial 137 finished with value: -4948.98974609375 and parameters: {'r_scaling': 0.2708338368687138	'unroll': 9	'update_epoch': 10	'discount': 0.9752454437140985	'lr': 0.00010589853192297975	'entropy': 0.015365371740326986}. Best is trial 51 with value: -8851.7880859375. [0m
[32m[I 2022-01-12 00:35:17	900] [0m Trial 138 finished with value: -1265.7728271484375 and parameters: {'r_scaling': 3.373902563652794	'unroll': 12	'update_epoch': 11	'discount': 0.9948471997617632	'lr': 0.00027146699922273596	'entropy': 0.02757455259761927}. Best is trial 51 with value: -8851.7880859375. [0m
[32m[I 2022-01-12 00:46:23	492] [0m Trial 139 finished with value: -6710.6865234375 and parameters: {'r_scaling': 0.4151454741823393	'unroll': 7	'update_epoch': 12	'discount': 0.9899745143626497	'lr': 0.00019434444646805374	'entropy': 0.06822064060825989}. Best is trial 51 with value: -8851.7880859375. [0m
[32m[I 2022-01-12 00:53:29	298] [0m Trial 140 finished with value: -1195.1346435546875 and parameters: {'r_scaling': 1.1242676760934303	'unroll': 10	'update_epoch': 13	'discount': 0.9926747944630848	'lr': 0.00021453555706968267	'entropy': 0.0016660724195967991}. Best is trial 51 with value: -8851.7880859375. [0m
[32m[I 2022-01-12 01:00:15	398] [0m Trial 141 finished with value: -1447.55615234375 and parameters: {'r_scaling': 0.20046807673515135	'unroll': 8	'update_epoch': 10	'discount': 0.9870371351127216	'lr': 0.00016297657103264086	'entropy': 0.00034000249429720235}. Best is trial 51 with value: -8851.7880859375. [0m
[32m[I 2022-01-12 01:07:06	428] [0m Trial 142 finished with value: -7247.79248046875 and parameters: {'r_scaling': 0.3238009214426426	'unroll': 7	'update_epoch': 9	'discount': 0.9846790939040385	'lr': 0.00015582971641813945	'entropy': 0.04722033315595917}. Best is trial 51 with value: -8851.7880859375. [0m
[32m[I 2022-01-12 01:18:07	188] [0m Trial 143 finished with value: -7373.5537109375 and parameters: {'r_scaling': 0.13454004360771196	'unroll': 7	'update_epoch': 10	'discount': 0.9888852096852292	'lr': 0.00014295636129117115	'entropy': 0.03072980231107092}. Best is trial 51 with value: -8851.7880859375. [0m
[32m[I 2022-01-12 01:29:27	942] [0m Trial 144 finished with value: -7906.29833984375 and parameters: {'r_scaling': 0.21751226149541708	'unroll': 6	'update_epoch': 11	'discount': 0.9809482099188234	'lr': 0.00013222050966885536	'entropy': 0.021587862690693082}. Best is trial 51 with value: -8851.7880859375. [0m
[32m[I 2022-01-12 01:40:28	493] [0m Trial 145 finished with value: -955.5951538085938 and parameters: {'r_scaling': 0.24904153011133284	'unroll': 7	'update_epoch': 9	'discount': 0.9353369515843105	'lr': 0.00011431434969739583	'entropy': 0.04093660461423302}. Best is trial 51 with value: -8851.7880859375. [0m
[32m[I 2022-01-12 01:50:28	291] [0m Trial 146 finished with value: -773.8516235351562 and parameters: {'r_scaling': 0.5606335394813676	'unroll': 8	'update_epoch': 4	'discount': 0.978415889659922	'lr': 0.00018157653548614582	'entropy': 0.08234195030169629}. Best is trial 51 with value: -8851.7880859375. [0m
[32m[I 2022-01-12 01:57:38	284] [0m Trial 147 finished with value: -6126.1953125 and parameters: {'r_scaling': 0.176743603846343	'unroll': 6	'update_epoch': 10	'discount': 0.9918987906722796	'lr': 0.0005153523193694219	'entropy': 0.05356822979392538}. Best is trial 51 with value: -8851.7880859375. [0m
[32m[I 2022-01-12 02:04:50	101] [0m Trial 148 finished with value: -6813.2529296875 and parameters: {'r_scaling': 0.1467056796639368	'unroll': 6	'update_epoch': 10	'discount': 0.9863787574053795	'lr': 0.00016860190922412914	'entropy': 0.005711673516720142}. Best is trial 51 with value: -8851.7880859375. [0m
[32m[I 2022-01-12 02:12:10	010] [0m Trial 149 finished with value: -3825.58642578125 and parameters: {'r_scaling': 0.08913804486235231	'unroll': 5	'update_epoch': 11	'discount': 0.983635538175343	'lr': 0.00014800968319475766	'entropy': 0.035152391748609846}. Best is trial 51 with value: -8851.7880859375. [0m
[32m[I 2022-01-12 02:18:49	783] [0m Trial 150 finished with value: -1354.8768310546875 and parameters: {'r_scaling': 0.30193268810724977	'unroll': 8	'update_epoch': 9	'discount': 0.9897279319596625	'lr': 0.00024051247362785302	'entropy': 0.024193645018532644}. Best is trial 51 with value: -8851.7880859375. [0m
[32m[I 2022-01-12 02:30:07	785] [0m Trial 151 finished with value: -9134.8017578125 and parameters: {'r_scaling': 0.21804078284583595	'unroll': 6	'update_epoch': 11	'discount': 0.9814598677032074	'lr': 0.00012788246462461402	'entropy': 0.011629680086639397}. Best is trial 151 with value: -9134.8017578125. [0m
[32m[I 2022-01-12 02:37:21	774] [0m Trial 152 finished with value: -6962.736328125 and parameters: {'r_scaling': 0.3889943571582396	'unroll': 7	'update_epoch': 12	'discount': 0.9819232961424326	'lr': 0.00012373863201612967	'entropy': 0.014570178692469656}. Best is trial 151 with value: -9134.8017578125. [0m
[32m[I 2022-01-12 02:44:58	081] [0m Trial 153 finished with value: -1083.6044921875 and parameters: {'r_scaling': 0.11722000274211238	'unroll': 5	'update_epoch': 11	'discount': 0.9255162853265715	'lr': 0.00013284354138895683	'entropy': 0.013160394146509198}. Best is trial 151 with value: -9134.8017578125. [0m
[32m[I 2022-01-12 02:51:35	930] [0m Trial 154 finished with value: -2956.517333984375 and parameters: {'r_scaling': 0.23835449432767436	'unroll': 10	'update_epoch': 10	'discount': 0.9767295573135868	'lr': 0.0001000017772457165	'entropy': 0.0449430566738439}. Best is trial 151 with value: -9134.8017578125. [0m
[32m[I 2022-01-12 02:58:06	472] [0m Trial 155 finished with value: -2188.20703125 and parameters: {'r_scaling': 0.34553045387623205	'unroll': 14	'update_epoch': 11	'discount': 0.9855312579225403	'lr': 0.0001275619124137499	'entropy': 0.011417642123985567}. Best is trial 151 with value: -9134.8017578125. [0m
[32m[I 2022-01-12 03:05:13	215] [0m Trial 156 finished with value: -6633.99755859375 and parameters: {'r_scaling': 0.1937564092068373	'unroll': 6	'update_epoch': 10	'discount': 0.9932037595878608	'lr': 0.0001153751761384095	'entropy': 0.009648771763356972}. Best is trial 151 with value: -9134.8017578125. [0m
[32m[I 2022-01-12 03:16:07	422] [0m Trial 157 finished with value: -4408.59130859375 and parameters: {'r_scaling': 0.29193511090028523	'unroll': 9	'update_epoch': 9	'discount': 0.9796689953483609	'lr': 0.00015705155105778904	'entropy': 0.01664618382404821}. Best is trial 151 with value: -9134.8017578125. [0m
[32m[I 2022-01-12 03:23:08	793] [0m Trial 158 finished with value: -2243.879638671875 and parameters: {'r_scaling': 0.14995403254410652	'unroll': 7	'update_epoch': 10	'discount': 0.9625855761653808	'lr': 0.0001425319687362374	'entropy': 0.008561728335390699}. Best is trial 151 with value: -9134.8017578125. [0m
[32m[I 2022-01-12 03:30:24	353] [0m Trial 159 finished with value: -431.2308349609375 and parameters: {'r_scaling': 0.05796393509681091	'unroll': 6	'update_epoch': 11	'discount': 0.9412730326058497	'lr': 0.00032780164962774945	'entropy': 0.06158345724210601}. Best is trial 151 with value: -9134.8017578125. [0m
[32m[I 2022-01-12 03:37:51	965] [0m Trial 160 finished with value: -1452.6065673828125 and parameters: {'r_scaling': 2.117847023676166	'unroll': 5	'update_epoch': 12	'discount': 0.9879538737069852	'lr': 0.00012154989917698432	'entropy': 0.029074080665721563}. Best is trial 151 with value: -9134.8017578125. [0m
[32m[I 2022-01-12 03:45:05	297] [0m Trial 161 finished with value: -7268.02734375 and parameters: {'r_scaling': 0.2221245023796058	'unroll': 6	'update_epoch': 11	'discount': 0.9810094454662557	'lr': 0.00013413427217505886	'entropy': 0.021968726832318555}. Best is trial 151 with value: -9134.8017578125. [0m
[32m[I 2022-01-12 03:52:45	461] [0m Trial 162 finished with value: -8515.8798828125 and parameters: {'r_scaling': 0.1855436956064113	'unroll': 6	'update_epoch': 11	'discount': 0.9829009719689881	'lr': 0.00013139050238591943	'entropy': 0.018294562719985433}. Best is trial 151 with value: -9134.8017578125. [0m
[32m[I 2022-01-12 03:59:45	922] [0m Trial 163 finished with value: -8065.3310546875 and parameters: {'r_scaling': 0.1800014894561188	'unroll': 7	'update_epoch': 10	'discount': 0.9827511682157128	'lr': 0.00011114257650438823	'entropy': 0.01938093832054448}. Best is trial 151 with value: -9134.8017578125. [0m
[32m[I 2022-01-12 04:10:33	160] [0m Trial 164 finished with value: -5509.693359375 and parameters: {'r_scaling': 0.264857593636689	'unroll': 6	'update_epoch': 10	'discount': 0.9776283054830196	'lr': 0.00011038779068461308	'entropy': 0.01758756018558741}. Best is trial 151 with value: -9134.8017578125. [0m
[32m[I 2022-01-12 04:21:48	972] [0m Trial 165 finished with value: -4206.439453125 and parameters: {'r_scaling': 0.47705928386356905	'unroll': 5	'update_epoch': 11	'discount': 0.982762328237444	'lr': 0.00011572082076822886	'entropy': 0.01891416814974385}. Best is trial 151 with value: -9134.8017578125. [0m
[32m[I 2022-01-12 04:28:57	115] [0m Trial 166 finished with value: -6027.26318359375 and parameters: {'r_scaling': 0.37614773402674073	'unroll': 5	'update_epoch': 10	'discount': 0.9837285546583645	'lr': 0.00010692387731292803	'entropy': 0.015192573428216723}. Best is trial 151 with value: -9134.8017578125. [0m
[32m[I 2022-01-12 04:36:26	338] [0m Trial 167 finished with value: -5126.59375 and parameters: {'r_scaling': 0.12671844619898634	'unroll': 6	'update_epoch': 12	'discount': 0.9737488069660603	'lr': 0.000125309104502082	'entropy': 0.013474524860353573}. Best is trial 151 with value: -9134.8017578125. [0m
[32m[I 2022-01-12 04:47:21	147] [0m Trial 168 finished with value: -8864.5185546875 and parameters: {'r_scaling': 0.1960834779923985	'unroll': 7	'update_epoch': 11	'discount': 0.9858938554171573	'lr': 0.00011810471526788234	'entropy': 0.011210493450087997}. Best is trial 151 with value: -9134.8017578125. [0m
[32m[I 2022-01-12 04:58:37	180] [0m Trial 169 finished with value: -5775.009765625 and parameters: {'r_scaling': 0.1945549479699681	'unroll': 7	'update_epoch': 12	'discount': 0.990420945088459	'lr': 0.00011718289589521887	'entropy': 0.011719318738553306}. Best is trial 151 with value: -9134.8017578125. [0m
[32m[I 2022-01-12 05:05:20	662] [0m Trial 170 finished with value: -1254.515869140625 and parameters: {'r_scaling': 0.33225354871838036	'unroll': 15	'update_epoch': 11	'discount': 0.9795484815893937	'lr': 0.0001041112129983534	'entropy': 0.010365192183218928}. Best is trial 151 with value: -9134.8017578125. [0m
[32m[I 2022-01-12 05:16:39	694] [0m Trial 171 finished with value: -8591.0634765625 and parameters: {'r_scaling': 0.1738566974548058	'unroll': 7	'update_epoch': 11	'discount': 0.985614008044273	'lr': 0.00013651739772416852	'entropy': 0.016985231780573103}. Best is trial 151 with value: -9134.8017578125. [0m
[32m[I 2022-01-12 05:28:27	322] [0m Trial 172 finished with value: -7228.29833984375 and parameters: {'r_scaling': 0.1751536360303182	'unroll': 7	'update_epoch': 11	'discount': 0.985770757296153	'lr': 0.00013639046658327314	'entropy': 0.0158588678765037}. Best is trial 151 with value: -9134.8017578125. [0m
[32m[I 2022-01-12 05:35:23	883] [0m Trial 173 finished with value: -5797.93359375 and parameters: {'r_scaling': 0.24072355357528116	'unroll': 8	'update_epoch': 11	'discount': 0.9842098694461646	'lr': 0.00012480061604662333	'entropy': 0.012088711304103677}. Best is trial 151 with value: -9134.8017578125. [0m
[32m[I 2022-01-12 05:46:34	154] [0m Trial 174 finished with value: -7006.95361328125 and parameters: {'r_scaling': 0.2920280314803246	'unroll': 7	'update_epoch': 12	'discount': 0.9814411847742629	'lr': 0.00011007536693146766	'entropy': 0.07247885168905488}. Best is trial 151 with value: -9134.8017578125. [0m
[32m[I 2022-01-12 05:57:42	458] [0m Trial 175 finished with value: -7984.02490234375 and parameters: {'r_scaling': 0.10809145224123048	'unroll': 7	'update_epoch': 11	'discount': 0.9863422508278724	'lr': 0.00012963048680836293	'entropy': 0.018374975184014843}. Best is trial 151 with value: -9134.8017578125. [0m
[32m[I 2022-01-12 06:04:43	579] [0m Trial 176 finished with value: -2707.369873046875 and parameters: {'r_scaling': 0.2078809426325914	'unroll': 6	'update_epoch': 10	'discount': 0.9907945794576084	'lr': 0.00014161436873763957	'entropy': 0.02066544573009782}. Best is trial 151 with value: -9134.8017578125. [0m
[32m[I 2022-01-12 06:15:31	521] [0m Trial 177 finished with value: -1138.1724853515625 and parameters: {'r_scaling': 0.6579860087383046	'unroll': 8	'update_epoch': 12	'discount': 0.9160574413189224	'lr': 0.00011786459213132922	'entropy': 0.013870209076613226}. Best is trial 151 with value: -9134.8017578125. [0m
[32m[I 2022-01-12 06:26:44	115] [0m Trial 178 finished with value: -5969.57861328125 and parameters: {'r_scaling': 0.15496920110825305	'unroll': 7	'update_epoch': 11	'discount': 0.9889922363501487	'lr': 0.0007221820256107589	'entropy': 0.007394919091578434}. Best is trial 151 with value: -9134.8017578125. [0m
[32m[I 2022-01-12 06:34:05	014] [0m Trial 179 finished with value: -4661.0205078125 and parameters: {'r_scaling': 0.45628480200690985	'unroll': 4	'update_epoch': 10	'discount': 0.9928740741631077	'lr': 0.0001295599524256953	'entropy': 0.05070050384289485}. Best is trial 151 with value: -9134.8017578125. [0m
[32m[I 2022-01-12 06:41:12	375] [0m Trial 180 finished with value: -7289.2939453125 and parameters: {'r_scaling': 0.2627604207352508	'unroll': 6	'update_epoch': 11	'discount': 0.9828161346853348	'lr': 0.0001122206665374796	'entropy': 0.026819373918218807}. Best is trial 151 with value: -9134.8017578125. [0m
[32m[I 2022-01-12 06:47:44	782] [0m Trial 181 finished with value: -2469.52490234375 and parameters: {'r_scaling': 0.17565572414068553	'unroll': 13	'update_epoch': 10	'discount': 0.9880799327778632	'lr': 0.00013783835067090005	'entropy': 0.021300267740523644}. Best is trial 151 with value: -9134.8017578125. [0m
[32m[I 2022-01-12 06:54:40	075] [0m Trial 182 finished with value: -8636.93359375 and parameters: {'r_scaling': 0.13603125845062983	'unroll': 9	'update_epoch': 10	'discount': 0.9852804746897864	'lr': 0.00012290126769119557	'entropy': 0.024807161741440112}. Best is trial 151 with value: -9134.8017578125. [0m
[32m[I 2022-01-12 07:01:36	049] [0m Trial 183 finished with value: -8121.76904296875 and parameters: {'r_scaling': 0.08990628934620282	'unroll': 9	'update_epoch': 10	'discount': 0.985201814338968	'lr': 0.00011983941579251166	'entropy': 0.023798819828719946}. Best is trial 151 with value: -9134.8017578125. [0m
[32m[I 2022-01-12 07:08:36	101] [0m Trial 184 finished with value: -7561.22509765625 and parameters: {'r_scaling': 0.07686974458400213	'unroll': 9	'update_epoch': 11	'discount': 0.9849738073435583	'lr': 0.00012064280086104079	'entropy': 0.004288542249804063}. Best is trial 151 with value: -9134.8017578125. [0m
[32m[I 2022-01-12 07:15:30	072] [0m Trial 185 finished with value: -7139.7431640625 and parameters: {'r_scaling': 0.09751733934544682	'unroll': 9	'update_epoch': 10	'discount': 0.9806010699362329	'lr': 0.00014812838351977808	'entropy': 0.02330255237747063}. Best is trial 151 with value: -9134.8017578125. [0m
[32m[I 2022-01-12 07:22:26	146] [0m Trial 186 finished with value: -6444.5087890625 and parameters: {'r_scaling': 0.1318881959124467	'unroll': 9	'update_epoch': 10	'discount': 0.978466450765228	'lr': 0.00010481821157977684	'entropy': 0.016441302045810083}. Best is trial 151 with value: -9134.8017578125. [0m
[32m[I 2022-01-12 07:29:13	696] [0m Trial 187 finished with value: -7414.18505859375 and parameters: {'r_scaling': 0.11914117500641623	'unroll': 8	'update_epoch': 11	'discount': 0.9831985176985643	'lr': 0.00011689739191051403	'entropy': 0.025558508574756788}. Best is trial 151 with value: -9134.8017578125. [0m
[32m[I 2022-01-12 07:35:45	816] [0m Trial 188 finished with value: -7389.865234375 and parameters: {'r_scaling': 0.08296873467673077	'unroll': 10	'update_epoch': 10	'discount': 0.9869201276002897	'lr': 0.00012342612036321144	'entropy': 0.01848356340309758}. Best is trial 151 with value: -9134.8017578125. [0m
[32m[I 2022-01-12 07:42:55	849] [0m Trial 189 finished with value: -4748.08203125 and parameters: {'r_scaling': 0.06640389934981326	'unroll': 7	'update_epoch': 12	'discount': 0.9851051102886217	'lr': 0.00013345623822646447	'entropy': 0.03003976942455228}. Best is trial 151 with value: -9134.8017578125. [0m
[32m[I 2022-01-12 07:48:27	044] [0m Trial 190 finished with value: -621.7540893554688 and parameters: {'r_scaling': 0.10196206574889252	'unroll': 10	'update_epoch': 1	'discount': 0.9817571203869891	'lr': 0.00011176300114898151	'entropy': 0.09034284324728524}. Best is trial 151 with value: -9134.8017578125. [0m
[32m[I 2022-01-12 07:55:39	724] [0m Trial 191 finished with value: -5777.7744140625 and parameters: {'r_scaling': 67.41249649307264	'unroll': 9	'update_epoch': 10	'discount': 0.991458985327282	'lr': 0.00012717053820946388	'entropy': 0.04094402506117392}. Best is trial 151 with value: -9134.8017578125. [0m
[32m[I 2022-01-12 08:02:32	007] [0m Trial 192 finished with value: -7011.85107421875 and parameters: {'r_scaling': 0.2274322151756427	'unroll': 9	'update_epoch': 10	'discount': 0.9892333638597992	'lr': 0.0001212714944377024	'entropy': 0.05718926686735798}. Best is trial 151 with value: -9134.8017578125. [0m
[32m[I 2022-01-12 08:09:12	791] [0m Trial 193 finished with value: -6407.12451171875 and parameters: {'r_scaling': 0.3687207553444817	'unroll': 8	'update_epoch': 10	'discount': 0.9863013830141387	'lr': 0.00013907245944975617	'entropy': 0.03455965680844525}. Best is trial 151 with value: -9134.8017578125. [0m
[32m[I 2022-01-12 08:20:22	973] [0m Trial 194 finished with value: -7808.990234375 and parameters: {'r_scaling': 0.14532265355121984	'unroll': 6	'update_epoch': 11	'discount': 0.9943059882165576	'lr': 0.00013121012550736474	'entropy': 0.04762798832378904}. Best is trial 151 with value: -9134.8017578125. [0m
[32m[I 2022-01-12 08:27:25	956] [0m Trial 195 finished with value: -7668.646484375 and parameters: {'r_scaling': 0.1834363351665262	'unroll': 5	'update_epoch': 10	'discount': 0.9839252833075824	'lr': 0.00015150485829090867	'entropy': 0.020201025335155175}. Best is trial 151 with value: -9134.8017578125. [0m
[32m[I 2022-01-12 08:34:32	870] [0m Trial 196 finished with value: -4733.1181640625 and parameters: {'r_scaling': 0.30929605430855855	'unroll': 6	'update_epoch': 11	'discount': 0.9760135524561498	'lr': 0.00011486301522091708	'entropy': 0.024758422306800542}. Best is trial 151 with value: -9134.8017578125. [0m
[32m[I 2022-01-12 08:44:37	635] [0m Trial 197 finished with value: -4610.61669921875 and parameters: {'r_scaling': 0.4369380116484108	'unroll': 9	'update_epoch': 9	'discount': 0.9909344448750551	'lr': 0.0001247996059364718	'entropy': 0.009904254350782965}. Best is trial 151 with value: -9134.8017578125. [0m
[32m[I 2022-01-12 08:54:50	188] [0m Trial 198 finished with value: -8332.6142578125 and parameters: {'r_scaling': 0.23672900971805258	'unroll': 7	'update_epoch': 10	'discount': 0.9798862725254315	'lr': 0.0001406952693962465	'entropy': 0.03248177335464421}. Best is trial 151 with value: -9134.8017578125. [0m
[32m[I 2022-01-12 09:01:45	927] [0m Trial 199 finished with value: -5304.60986328125 and parameters: {'r_scaling': 0.22201791295785592	'unroll': 7	'update_epoch': 11	'discount': 0.9782260466900039	'lr': 0.0001701889284630416	'entropy': 0.0319256559276154}. Best is trial 151 with value: -9134.8017578125. [0m
