# Supplementary material
Source: ML conference proceedings conference paper supplement (https://proceedings.neurips.cc/paper_files/paper/2022/hash/10a6bdcabbd5a3d36b760daa295f63c1-Abstract.html)
Supplement: Supplementary file 1 [file 10a6bdcabbd5a3d36b760daa295f63c1-Supplemental-Conference.zip › neurips2022/code/robotics_code/hp_searches/humanoid_30M.log]

[32m[I 2022-01-10 15:05:01	874] [0m A new study created in memory with name: no-name-b842c238-da96-4117-97c1-501a0b70cf78 [0m
[32m[I 2022-01-10 15:11:08	176] [0m Trial 0 finished with value: -288.5096740722656 and parameters: {'r_scaling': 3.2389285781463837	'unroll': 5	'update_epoch': 5	'discount': 0.915509942213319	'lr': 0.0013310104220268808	'entropy': 0.0070631094510661945}. Best is trial 0 with value: -288.5096740722656. [0m
[32m[I 2022-01-10 15:17:43	093] [0m Trial 1 finished with value: -904.6892700195312 and parameters: {'r_scaling': 15.250894377035001	'unroll': 11	'update_epoch': 8	'discount': 0.9090948814350619	'lr': 0.0006447876404049096	'entropy': 0.09133177553167163}. Best is trial 1 with value: -904.6892700195312. [0m
[32m[I 2022-01-10 15:23:07	940] [0m Trial 2 finished with value: -339.1726989746094 and parameters: {'r_scaling': 0.7657535277855645	'unroll': 8	'update_epoch': 1	'discount': 0.9101188409042111	'lr': 0.001945537776277082	'entropy': 0.0003282108953590371}. Best is trial 1 with value: -904.6892700195312. [0m
[32m[I 2022-01-10 15:28:39	066] [0m Trial 3 finished with value: -394.51336669921875 and parameters: {'r_scaling': 0.07861723148892184	'unroll': 10	'update_epoch': 4	'discount': 0.9146196307748098	'lr': 0.0001654080805737221	'entropy': 0.08964856274457446}. Best is trial 1 with value: -904.6892700195312. [0m
[32m[I 2022-01-10 15:35:08	621] [0m Trial 4 finished with value: -1131.774658203125 and parameters: {'r_scaling': 19.123315610174586	'unroll': 12	'update_epoch': 7	'discount': 0.9528965078258597	'lr': 0.00015051344371518733	'entropy': 0.030309858213652556}. Best is trial 4 with value: -1131.774658203125. [0m
[32m[I 2022-01-10 15:41:12	593] [0m Trial 5 finished with value: -1282.46630859375 and parameters: {'r_scaling': 1.1405825368029723	'unroll': 3	'update_epoch': 2	'discount': 0.9867425283418342	'lr': 0.0004048104119988121	'entropy': 0.00019740599663920874}. Best is trial 5 with value: -1282.46630859375. [0m
[32m[I 2022-01-10 15:48:23	252] [0m Trial 6 finished with value: -358.5353698730469 and parameters: {'r_scaling': 0.3784089871347675	'unroll': 14	'update_epoch': 11	'discount': 0.9294172101606542	'lr': 0.0010076874975159871	'entropy': 0.002804829232789704}. Best is trial 5 with value: -1282.46630859375. [0m
[32m[I 2022-01-10 15:59:28	772] [0m Trial 7 finished with value: -351.5163879394531 and parameters: {'r_scaling': 0.07675291109651704	'unroll': 1	'update_epoch': 14	'discount': 0.9005802201371493	'lr': 0.00018823261111059592	'entropy': 0.07722646681582852}. Best is trial 5 with value: -1282.46630859375. [0m
[32m[I 2022-01-10 16:05:52	298] [0m Trial 8 finished with value: -1463.7509765625 and parameters: {'r_scaling': 3.675919333325412	'unroll': 7	'update_epoch': 8	'discount': 0.9751237349877399	'lr': 0.000508545690890258	'entropy': 0.03364487522749731}. Best is trial 8 with value: -1463.7509765625. [0m
[32m[I 2022-01-10 16:12:37	518] [0m Trial 9 finished with value: -1066.99951171875 and parameters: {'r_scaling': 27.814549206792872	'unroll': 8	'update_epoch': 8	'discount': 0.9554199888030904	'lr': 0.0006708174009374078	'entropy': 0.00013786998534328262}. Best is trial 8 with value: -1463.7509765625. [0m
[32m[I 2022-01-10 16:20:30	548] [0m Trial 10 finished with value: -5787.9326171875 and parameters: {'r_scaling': 157.8559968980383	'unroll': 5	'update_epoch': 12	'discount': 0.9948596204918381	'lr': 0.0003534891821255305	'entropy': 0.00857517693590566}. Best is trial 10 with value: -5787.9326171875. [0m
[32m[I 2022-01-10 16:28:16	748] [0m Trial 11 finished with value: -4718.10205078125 and parameters: {'r_scaling': 195.6191856162798	'unroll': 5	'update_epoch': 12	'discount': 0.9946989267854673	'lr': 0.00030244868670915474	'entropy': 0.007189568120094079}. Best is trial 10 with value: -5787.9326171875. [0m
[32m[I 2022-01-10 16:36:15	780] [0m Trial 12 finished with value: -1896.707275390625 and parameters: {'r_scaling': 179.80453767896827	'unroll': 5	'update_epoch': 12	'discount': 0.9915905553811074	'lr': 0.00032587390083318015	'entropy': 0.004104197083109899}. Best is trial 10 with value: -5787.9326171875. [0m
[32m[I 2022-01-10 16:44:44	028] [0m Trial 13 finished with value: -2092.778076171875 and parameters: {'r_scaling': 116.46034030635457	'unroll': 5	'update_epoch': 15	'discount': 0.9727078985558694	'lr': 0.0002751873307657936	'entropy': 0.0011155521427663319}. Best is trial 10 with value: -5787.9326171875. [0m
[32m[I 2022-01-10 16:53:20	552] [0m Trial 14 finished with value: -1395.7333984375 and parameters: {'r_scaling': 60.22529382532711	'unroll': 2	'update_epoch': 11	'discount': 0.9712288044583427	'lr': 0.00025080708022909553	'entropy': 0.01189865919569111}. Best is trial 10 with value: -5787.9326171875. [0m
[32m[I 2022-01-10 17:01:41	143] [0m Trial 15 finished with value: -5781.35205078125 and parameters: {'r_scaling': 54.69134880157038	'unroll': 4	'update_epoch': 13	'discount': 0.9936117627731479	'lr': 0.00010689760467686673	'entropy': 0.0012325416229779598}. Best is trial 10 with value: -5787.9326171875. [0m
[32m[I 2022-01-10 17:09:53	507] [0m Trial 16 finished with value: -993.255615234375 and parameters: {'r_scaling': 7.978160749039156	'unroll': 3	'update_epoch': 13	'discount': 0.9392685897469949	'lr': 0.00010498812985673456	'entropy': 0.0013071464477679919}. Best is trial 10 with value: -5787.9326171875. [0m
[32m[I 2022-01-10 17:17:01	779] [0m Trial 17 finished with value: -1668.8199462890625 and parameters: {'r_scaling': 53.774313767991195	'unroll': 6	'update_epoch': 10	'discount': 0.9801400203279266	'lr': 0.00012467021592858739	'entropy': 0.0009119041444850187}. Best is trial 10 with value: -5787.9326171875. [0m
[32m[I 2022-01-10 17:25:46	202] [0m Trial 18 finished with value: -1364.0908203125 and parameters: {'r_scaling': 41.27542470769649	'unroll': 3	'update_epoch': 15	'discount': 0.9589224780384235	'lr': 0.0002277624395274017	'entropy': 0.0019869949613114508}. Best is trial 10 with value: -5787.9326171875. [0m
[32m[I 2022-01-10 17:33:01	865] [0m Trial 19 finished with value: -287.4043273925781 and parameters: {'r_scaling': 7.978870366189842	'unroll': 9	'update_epoch': 10	'discount': 0.9650575440164398	'lr': 0.000839278170910991	'entropy': 0.0006339613971051835}. Best is trial 10 with value: -5787.9326171875. [0m
[32m[I 2022-01-10 17:43:18	830] [0m Trial 20 finished with value: -2565.63134765625 and parameters: {'r_scaling': 81.85456627780405	'unroll': 1	'update_epoch': 13	'discount': 0.9821803773729376	'lr': 0.00010005462137921937	'entropy': 0.014399329886090979}. Best is trial 10 with value: -5787.9326171875. [0m
[32m[I 2022-01-10 17:51:32	905] [0m Trial 21 finished with value: -3462.635498046875 and parameters: {'r_scaling': 199.85689163864075	'unroll': 4	'update_epoch': 13	'discount': 0.9919962606973455	'lr': 0.00041157054774425587	'entropy': 0.004918511643515205}. Best is trial 10 with value: -5787.9326171875. [0m
[32m[I 2022-01-10 17:59:04	153] [0m Trial 22 finished with value: -1912.8780517578125 and parameters: {'r_scaling': 100.16948364919318	'unroll': 6	'update_epoch': 10	'discount': 0.9942290704979054	'lr': 0.0003343658793892703	'entropy': 0.009782976371915846}. Best is trial 10 with value: -5787.9326171875. [0m
[32m[I 2022-01-10 18:06:30	059] [0m Trial 23 finished with value: -5708.365234375 and parameters: {'r_scaling': 192.90968948608162	'unroll': 7	'update_epoch': 12	'discount': 0.984235637269523	'lr': 0.00019843748598145404	'entropy': 0.020380651443721427}. Best is trial 10 with value: -5787.9326171875. [0m
[32m[I 2022-01-10 18:14:10	217] [0m Trial 24 finished with value: -2616.440673828125 and parameters: {'r_scaling': 33.87422204221493	'unroll': 7	'update_epoch': 14	'discount': 0.985145754695688	'lr': 0.0002080133588522911	'entropy': 0.02781694919508483}. Best is trial 10 with value: -5787.9326171875. [0m
[32m[I 2022-01-10 18:21:18	630] [0m Trial 25 finished with value: -1226.3905029296875 and parameters: {'r_scaling': 87.9392655741793	'unroll': 7	'update_epoch': 11	'discount': 0.9637890906410695	'lr': 0.00014562088176257895	'entropy': 0.01803368032551069}. Best is trial 10 with value: -5787.9326171875. [0m
[32m[I 2022-01-10 18:28:39	966] [0m Trial 26 finished with value: -981.424072265625 and parameters: {'r_scaling': 12.283001872089809	'unroll': 4	'update_epoch': 9	'discount': 0.94524238435223	'lr': 0.00012405512072566883	'entropy': 0.0022005819847303147}. Best is trial 10 with value: -5787.9326171875. [0m
[32m[I 2022-01-10 18:36:18	588] [0m Trial 27 finished with value: -3144.469482421875 and parameters: {'r_scaling': 27.372176984183525	'unroll': 9	'update_epoch': 12	'discount': 0.9787446647285327	'lr': 0.00019310062624683106	'entropy': 0.05142448532665537}. Best is trial 10 with value: -5787.9326171875. [0m
[32m[I 2022-01-10 18:44:14	374] [0m Trial 28 finished with value: -1819.7020263671875 and parameters: {'r_scaling': 53.51581992090204	'unroll': 6	'update_epoch': 14	'discount': 0.9860427906192426	'lr': 0.000518369533649283	'entropy': 0.0005191636768849501}. Best is trial 10 with value: -5787.9326171875. [0m
[32m[I 2022-01-10 18:50:52	581] [0m Trial 29 finished with value: -859.799560546875 and parameters: {'r_scaling': 3.4022908673666397	'unroll': 4	'update_epoch': 6	'discount': 0.9273970489389879	'lr': 0.00013149879363627255	'entropy': 0.006274475232259488}. Best is trial 10 with value: -5787.9326171875. [0m
[32m[I 2022-01-10 18:57:32	830] [0m Trial 30 finished with value: -623.6127319335938 and parameters: {'r_scaling': 138.26291521317995	'unroll': 2	'update_epoch': 4	'discount': 0.965168124396797	'lr': 0.0001837698592219978	'entropy': 0.01854884958944629}. Best is trial 10 with value: -5787.9326171875. [0m
[32m[I 2022-01-10 19:05:00	949] [0m Trial 31 finished with value: -5489.7490234375 and parameters: {'r_scaling': 196.8082773530947	'unroll': 6	'update_epoch': 12	'discount': 0.9948760120051654	'lr': 0.00030298725740262374	'entropy': 0.008006504044079439}. Best is trial 10 with value: -5787.9326171875. [0m
[32m[I 2022-01-10 19:12:23	687] [0m Trial 32 finished with value: -2187.3203125 and parameters: {'r_scaling': 102.95745956603079	'unroll': 6	'update_epoch': 12	'discount': 0.9875512904794453	'lr': 0.0003638461464784073	'entropy': 0.003576440870554004}. Best is trial 10 with value: -5787.9326171875. [0m
[32m[I 2022-01-10 19:19:53	201] [0m Trial 33 finished with value: -1211.8829345703125 and parameters: {'r_scaling': 70.4988858675086	'unroll': 8	'update_epoch': 13	'discount': 0.9776067072688945	'lr': 0.0002672154835089992	'entropy': 0.008997809131028451}. Best is trial 10 with value: -5787.9326171875. [0m
[32m[I 2022-01-10 19:27:25	024] [0m Trial 34 finished with value: -3264.5419921875 and parameters: {'r_scaling': 141.09412776368137	'unroll': 5	'update_epoch': 9	'discount': 0.9887667871592962	'lr': 0.0002296368360494889	'entropy': 0.021813801206067455}. Best is trial 10 with value: -5787.9326171875. [0m
[32m[I 2022-01-10 19:35:25	864] [0m Trial 35 finished with value: -1018.0914916992188 and parameters: {'r_scaling': 18.598957154014226	'unroll': 10	'update_epoch': 15	'discount': 0.9695260824805263	'lr': 0.0004940634709414396	'entropy': 0.044839836006288554}. Best is trial 10 with value: -5787.9326171875. [0m
[32m[I 2022-01-10 19:42:30	025] [0m Trial 36 finished with value: -814.3294067382812 and parameters: {'r_scaling': 0.1566137673528685	'unroll': 12	'update_epoch': 11	'discount': 0.9824643404241481	'lr': 0.0019018612000570063	'entropy': 0.0059457265563449}. Best is trial 10 with value: -5787.9326171875. [0m
[32m[I 2022-01-10 19:50:20	557] [0m Trial 37 finished with value: -2384.365234375 and parameters: {'r_scaling': 1.456018284530635	'unroll': 15	'update_epoch': 14	'discount': 0.9928660862415252	'lr': 0.0001640907821446713	'entropy': 0.00035914505596378765}. Best is trial 10 with value: -5787.9326171875. [0m
[32m[I 2022-01-10 19:58:33	822] [0m Trial 38 finished with value: -286.687744140625 and parameters: {'r_scaling': 42.93042162260602	'unroll': 4	'update_epoch': 12	'discount': 0.9948119379677796	'lr': 0.0006263377012837499	'entropy': 0.001705848516603534}. Best is trial 10 with value: -5787.9326171875. [0m
[32m[I 2022-01-10 20:05:37	038] [0m Trial 39 finished with value: -2213.8857421875 and parameters: {'r_scaling': 115.56874875722524	'unroll': 7	'update_epoch': 9	'discount': 0.9872994572363412	'lr': 0.00038368479691467853	'entropy': 0.0030669079930770865}. Best is trial 10 with value: -5787.9326171875. [0m
[32m[I 2022-01-10 20:12:27	038] [0m Trial 40 finished with value: -1750.3564453125 and parameters: {'r_scaling': 69.77470528950042	'unroll': 9	'update_epoch': 7	'discount': 0.9763905866736773	'lr': 0.00016149755951159878	'entropy': 0.010146525233658311}. Best is trial 10 with value: -5787.9326171875. [0m
[32m[I 2022-01-10 20:20:29	579] [0m Trial 41 finished with value: -4924.609375 and parameters: {'r_scaling': 193.35020325312883	'unroll': 5	'update_epoch': 12	'discount': 0.9908151348207485	'lr': 0.00030204688548557624	'entropy': 0.007443370807345706}. Best is trial 10 with value: -5787.9326171875. [0m
[32m[I 2022-01-10 20:28:09	769] [0m Trial 42 finished with value: -824.2905883789062 and parameters: {'r_scaling': 199.66160391111524	'unroll': 5	'update_epoch': 11	'discount': 0.9837472588753301	'lr': 0.00032291573091004105	'entropy': 0.007242182567664901}. Best is trial 10 with value: -5787.9326171875. [0m
[32m[I 2022-01-10 20:35:50	100] [0m Trial 43 finished with value: -4924.876953125 and parameters: {'r_scaling': 148.40743600648014	'unroll': 6	'update_epoch': 13	'discount': 0.9895803553630691	'lr': 0.0002858721173646013	'entropy': 0.012743636909848201}. Best is trial 10 with value: -5787.9326171875. [0m
[32m[I 2022-01-10 20:41:24	330] [0m Trial 44 finished with value: -522.4815063476562 and parameters: {'r_scaling': 127.86545547358705	'unroll': 8	'update_epoch': 1	'discount': 0.9891943156511953	'lr': 0.00022772829904840918	'entropy': 0.014310558560217027}. Best is trial 10 with value: -5787.9326171875. [0m
[32m[I 2022-01-10 20:49:34	388] [0m Trial 45 finished with value: -1605.096435546875 and parameters: {'r_scaling': 28.96718227745853	'unroll': 6	'update_epoch': 14	'discount': 0.9814826218988714	'lr': 0.00044860780040437067	'entropy': 0.026840868620883303}. Best is trial 10 with value: -5787.9326171875. [0m
[32m[I 2022-01-10 20:57:00	431] [0m Trial 46 finished with value: -6741.10693359375 and parameters: {'r_scaling': 0.4028419704906306	'unroll': 8	'update_epoch': 13	'discount': 0.9740383282442515	'lr': 0.00027933192049927615	'entropy': 0.004608111635469677}. Best is trial 46 with value: -6741.10693359375. [0m
[32m[I 2022-01-10 21:03:59	914] [0m Trial 47 finished with value: -1012.130615234375 and parameters: {'r_scaling': 0.331049486562666	'unroll': 8	'update_epoch': 10	'discount': 0.9736057039063546	'lr': 0.0005798476858201325	'entropy': 0.004588833404070487}. Best is trial 46 with value: -6741.10693359375. [0m
[32m[I 2022-01-10 21:11:40	543] [0m Trial 48 finished with value: -1152.4998779296875 and parameters: {'r_scaling': 2.1476060814305065	'unroll': 10	'update_epoch': 13	'discount': 0.921296432289142	'lr': 0.0002529984855397693	'entropy': 0.0027037128983905885}. Best is trial 46 with value: -6741.10693359375. [0m
[32m[I 2022-01-10 21:19:42	919] [0m Trial 49 finished with value: -349.95684814453125 and parameters: {'r_scaling': 0.5876548349063737	'unroll': 7	'update_epoch': 15	'discount': 0.9688683454699735	'lr': 0.0007678004183908821	'entropy': 0.0015529995593011612}. Best is trial 46 with value: -6741.10693359375. [0m
[32m[I 2022-01-10 21:28:40	759] [0m Trial 50 finished with value: -6544.8984375 and parameters: {'r_scaling': 0.15009985335862638	'unroll': 2	'update_epoch': 14	'discount': 0.9780204422479515	'lr': 0.00011323642033360688	'entropy': 0.0007589853454040916}. Best is trial 46 with value: -6741.10693359375. [0m
[32m[I 2022-01-10 21:38:16	708] [0m Trial 51 finished with value: -2101.9619140625 and parameters: {'r_scaling': 0.13049605402696413	'unroll': 2	'update_epoch': 14	'discount': 0.9755796097233773	'lr': 0.00011146937393035796	'entropy': 0.0009118965654043458}. Best is trial 46 with value: -6741.10693359375. [0m
[32m[I 2022-01-10 21:46:59	088] [0m Trial 52 finished with value: -2125.3798828125 and parameters: {'r_scaling': 0.21626613635296021	'unroll': 3	'update_epoch': 12	'discount': 0.9481149784143084	'lr': 0.0001431871156471962	'entropy': 0.000627470069703688}. Best is trial 46 with value: -6741.10693359375. [0m
[32m[I 2022-01-10 21:56:56	657] [0m Trial 53 finished with value: -3778.26708984375 and parameters: {'r_scaling': 0.5479573566278839	'unroll': 1	'update_epoch': 13	'discount': 0.984227356087156	'lr': 0.00012061688501762586	'entropy': 0.00018901835955193304}. Best is trial 46 with value: -6741.10693359375. [0m
[32m[I 2022-01-10 22:06:25	242] [0m Trial 54 finished with value: -3944.981689453125 and parameters: {'r_scaling': 0.11459525397996705	'unroll': 3	'update_epoch': 15	'discount': 0.9944044850740841	'lr': 0.00018142965046894052	'entropy': 0.0012909297213187956}. Best is trial 46 with value: -6741.10693359375. [0m
[32m[I 2022-01-10 22:15:19	466] [0m Trial 55 finished with value: -2302.695556640625 and parameters: {'r_scaling': 0.2733901460301899	'unroll': 2	'update_epoch': 11	'discount': 0.9799245103119925	'lr': 0.00011195680119297096	'entropy': 0.0004022442406699436}. Best is trial 46 with value: -6741.10693359375. [0m
[32m[I 2022-01-10 22:23:40	290] [0m Trial 56 finished with value: -758.8130493164062 and parameters: {'r_scaling': 6.246363284677811	'unroll': 7	'update_epoch': 14	'discount': 0.9088118192355101	'lr': 0.0003589261195461318	'entropy': 0.00026957643013835033}. Best is trial 46 with value: -6741.10693359375. [0m
[32m[I 2022-01-10 22:32:21	912] [0m Trial 57 finished with value: -911.4829711914062 and parameters: {'r_scaling': 90.20996074890245	'unroll': 4	'update_epoch': 13	'discount': 0.9600472388914489	'lr': 0.0002025060646792521	'entropy': 0.0008419259189282223}. Best is trial 46 with value: -6741.10693359375. [0m
[32m[I 2022-01-10 22:40:35	312] [0m Trial 58 finished with value: -5939.9140625 and parameters: {'r_scaling': 0.9960862976078987	'unroll': 5	'update_epoch': 12	'discount': 0.98568687325938	'lr': 0.0004298694356910287	'entropy': 0.002286249095818458}. Best is trial 46 with value: -6741.10693359375. [0m
[32m[I 2022-01-10 22:49:02	383] [0m Trial 59 finished with value: -6409.8056640625 and parameters: {'r_scaling': 0.052876844950455526	'unroll': 3	'update_epoch': 11	'discount': 0.9847697484605259	'lr': 0.00041796119120941923	'entropy': 0.002572438500660733}. Best is trial 46 with value: -6741.10693359375. [0m
[32m[I 2022-01-10 22:57:26	601] [0m Trial 60 finished with value: -1423.0723876953125 and parameters: {'r_scaling': 0.05677604844867964	'unroll': 3	'update_epoch': 10	'discount': 0.9352521384510742	'lr': 0.0004440605577547571	'entropy': 0.002415125317033797}. Best is trial 46 with value: -6741.10693359375. [0m
[32m[I 2022-01-10 23:05:11	543] [0m Trial 61 finished with value: -4393.927734375 and parameters: {'r_scaling': 0.9025095499285175	'unroll': 4	'update_epoch': 11	'discount': 0.9858020507874541	'lr': 0.0004506945101827945	'entropy': 0.0037461560792072498}. Best is trial 46 with value: -6741.10693359375. [0m
[32m[I 2022-01-10 23:15:49	984] [0m Trial 62 finished with value: -2681.991455078125 and parameters: {'r_scaling': 0.07233156366684174	'unroll': 1	'update_epoch': 13	'discount': 0.9794934999850302	'lr': 0.00040657397174985433	'entropy': 0.0010961227145412156}. Best is trial 46 with value: -6741.10693359375. [0m
[32m[I 2022-01-10 23:24:24	029] [0m Trial 63 finished with value: -4833.0595703125 and parameters: {'r_scaling': 0.49426889305517047	'unroll': 3	'update_epoch': 12	'discount': 0.9716728310865766	'lr': 0.00034139773655046316	'entropy': 0.0019141206320481227}. Best is trial 46 with value: -6741.10693359375. [0m
[32m[I 2022-01-10 23:32:50	605] [0m Trial 64 finished with value: -6882.830078125 and parameters: {'r_scaling': 0.20284093763880293	'unroll': 5	'update_epoch': 14	'discount': 0.9909779838677567	'lr': 0.00013435472840179938	'entropy': 0.0048815638366076965}. Best is trial 64 with value: -6882.830078125. [0m
[32m[I 2022-01-10 23:42:28	282] [0m Trial 65 finished with value: -4451.287109375 and parameters: {'r_scaling': 0.18312444747695877	'unroll': 2	'update_epoch': 14	'discount': 0.9916744248855409	'lr': 0.00013752293152807256	'entropy': 0.0051755053894868815}. Best is trial 64 with value: -6882.830078125. [0m
[32m[I 2022-01-10 23:50:50	727] [0m Trial 66 finished with value: -7642.58251953125 and parameters: {'r_scaling': 0.11061675054257661	'unroll': 5	'update_epoch': 15	'discount': 0.9897730839867258	'lr': 0.0001010054656360414	'entropy': 0.0032690862662167965}. Best is trial 66 with value: -7642.58251953125. [0m
[32m[I 2022-01-10 23:59:18	776] [0m Trial 67 finished with value: -286.88397216796875 and parameters: {'r_scaling': 0.11824175841476557	'unroll': 5	'update_epoch': 15	'discount': 0.9882271843925244	'lr': 0.0012917151375254697	'entropy': 0.0033204092247591044}. Best is trial 66 with value: -7642.58251953125. [0m
[32m[I 2022-01-11 00:05:16	757] [0m Trial 68 finished with value: -4596.94384765625 and parameters: {'r_scaling': 0.09287760824061413	'unroll': 5	'update_epoch': 2	'discount': 0.9748435848421355	'lr': 0.0005148235654217447	'entropy': 0.004192547131424565}. Best is trial 66 with value: -7642.58251953125. [0m
[32m[I 2022-01-11 00:12:33	438] [0m Trial 69 finished with value: -8926.5810546875 and parameters: {'r_scaling': 0.057169897673325316	'unroll': 12	'update_epoch': 15	'discount': 0.9816986845888267	'lr': 0.00010350827633417531	'entropy': 0.00572086005237879}. Best is trial 69 with value: -8926.5810546875. [0m
[32m[I 2022-01-11 00:19:57	562] [0m Trial 70 finished with value: -6027.11376953125 and parameters: {'r_scaling': 0.06408060917209125	'unroll': 12	'update_epoch': 15	'discount': 0.9674947884585742	'lr': 0.00011926758725799199	'entropy': 0.005583853759827276}. Best is trial 69 with value: -8926.5810546875. [0m
[32m[I 2022-01-11 00:27:51	694] [0m Trial 71 finished with value: -9392.828125 and parameters: {'r_scaling': 0.06286369078630047	'unroll': 11	'update_epoch': 15	'discount': 0.9776428384979308	'lr': 0.00010001974423908058	'entropy': 0.005757418482810319}. Best is trial 71 with value: -9392.828125. [0m
[32m[I 2022-01-11 00:34:38	994] [0m Trial 72 finished with value: -7551.78076171875 and parameters: {'r_scaling': 0.061483951583499064	'unroll': 12	'update_epoch': 15	'discount': 0.9684514311286002	'lr': 0.00011944854608858303	'entropy': 0.005478682688072566}. Best is trial 71 with value: -9392.828125. [0m
[32m[I 2022-01-11 00:42:20	120] [0m Trial 73 finished with value: -8854.3564453125 and parameters: {'r_scaling': 0.0896363443334212	'unroll': 13	'update_epoch': 15	'discount': 0.9777102826773714	'lr': 0.00010103276308346842	'entropy': 0.004432584959721212}. Best is trial 71 with value: -9392.828125. [0m
[32m[I 2022-01-11 00:49:45	362] [0m Trial 74 finished with value: -2809.041015625 and parameters: {'r_scaling': 0.08785791639592075	'unroll': 13	'update_epoch': 15	'discount': 0.9614497523186915	'lr': 0.00010570219791571706	'entropy': 0.00010640363919786398}. Best is trial 71 with value: -9392.828125. [0m
[32m[I 2022-01-11 00:57:55	195] [0m Trial 75 finished with value: -8841.77734375 and parameters: {'r_scaling': 0.22649470257986043	'unroll': 11	'update_epoch': 15	'discount': 0.9769958496540756	'lr': 0.00010095116747395447	'entropy': 0.006140627359096703}. Best is trial 71 with value: -9392.828125. [0m
[32m[I 2022-01-11 01:05:57	716] [0m Trial 76 finished with value: -9081.37890625 and parameters: {'r_scaling': 0.10117832450744343	'unroll': 11	'update_epoch': 15	'discount': 0.9704206324604862	'lr': 0.00012862777816186142	'entropy': 0.010570315080864057}. Best is trial 71 with value: -9392.828125. [0m
[32m[I 2022-01-11 01:13:59	914] [0m Trial 77 finished with value: -4036.966552734375 and parameters: {'r_scaling': 0.0930654252002082	'unroll': 11	'update_epoch': 15	'discount': 0.9670243978953532	'lr': 0.0001000694647586825	'entropy': 0.011015505390917767}. Best is trial 71 with value: -9392.828125. [0m
[32m[I 2022-01-11 01:21:25	861] [0m Trial 78 finished with value: -7021.03173828125 and parameters: {'r_scaling': 0.2336752827180912	'unroll': 13	'update_epoch': 15	'discount': 0.9713243636088383	'lr': 0.00013035339620144033	'entropy': 0.008545901001272815}. Best is trial 71 with value: -9392.828125. [0m
[32m[I 2022-01-11 01:28:51	676] [0m Trial 79 finished with value: -2106.713623046875 and parameters: {'r_scaling': 0.06895240015810367	'unroll': 13	'update_epoch': 15	'discount': 0.9530148675696233	'lr': 0.00012678687736681368	'entropy': 0.006159725979061288}. Best is trial 71 with value: -9392.828125. [0m
[32m[I 2022-01-11 01:36:48	894] [0m Trial 80 finished with value: -8231.8583984375 and parameters: {'r_scaling': 0.25924894326693815	'unroll': 11	'update_epoch': 15	'discount': 0.9715741552142124	'lr': 0.00014813386840650805	'entropy': 0.009450457111980667}. Best is trial 71 with value: -9392.828125. [0m
[32m[I 2022-01-11 01:44:59	668] [0m Trial 81 finished with value: -9721.966796875 and parameters: {'r_scaling': 0.10465735323666123	'unroll': 11	'update_epoch': 15	'discount': 0.9710913087154632	'lr': 0.00014956500007921771	'entropy': 0.008732827616564935}. Best is trial 81 with value: -9721.966796875. [0m
[32m[I 2022-01-11 01:53:03	031] [0m Trial 82 finished with value: -9236.5 and parameters: {'r_scaling': 0.10638652250975365	'unroll': 11	'update_epoch': 14	'discount': 0.9701854425678096	'lr': 0.00014844812875257745	'entropy': 0.006614804661620591}. Best is trial 81 with value: -9721.966796875. [0m
[32m[I 2022-01-11 02:00:39	551] [0m Trial 83 finished with value: -2609.465576171875 and parameters: {'r_scaling': 0.0996635788479995	'unroll': 10	'update_epoch': 15	'discount': 0.9637834037391609	'lr': 0.0001545169152048731	'entropy': 0.016694208016038}. Best is trial 81 with value: -9721.966796875. [0m
[32m[I 2022-01-11 02:08:48	746] [0m Trial 84 finished with value: -2328.0849609375 and parameters: {'r_scaling': 0.1526158728886139	'unroll': 11	'update_epoch': 14	'discount': 0.9557998046248039	'lr': 0.0001463125565084041	'entropy': 0.009905240871995572}. Best is trial 81 with value: -9721.966796875. [0m
[32m[I 2022-01-11 02:16:44	724] [0m Trial 85 finished with value: -10424.927734375 and parameters: {'r_scaling': 0.2676498036194947	'unroll': 11	'update_epoch': 14	'discount': 0.9812748924937666	'lr': 0.00017004406842185577	'entropy': 0.006959567895830372}. Best is trial 85 with value: -10424.927734375. [0m
[32m[I 2022-01-11 02:24:55	409] [0m Trial 86 finished with value: -10041.23828125 and parameters: {'r_scaling': 0.25655986004803366	'unroll': 11	'update_epoch': 14	'discount': 0.9766786418932449	'lr': 0.00015382622665363702	'entropy': 0.0068662321189323985}. Best is trial 85 with value: -10424.927734375. [0m
[32m[I 2022-01-11 02:33:06	823] [0m Trial 87 finished with value: -10219.587890625 and parameters: {'r_scaling': 0.08021691374028754	'unroll': 11	'update_epoch': 14	'discount': 0.9773499738372088	'lr': 0.00017457329629439058	'entropy': 0.007183701631461364}. Best is trial 85 with value: -10424.927734375. [0m
[32m[I 2022-01-11 02:40:42	611] [0m Trial 88 finished with value: -9345.22265625 and parameters: {'r_scaling': 0.08320381987366152	'unroll': 10	'update_epoch': 14	'discount': 0.981520897189908	'lr': 0.00018002521409228163	'entropy': 0.007173555316686316}. Best is trial 85 with value: -10424.927734375. [0m
[32m[I 2022-01-11 02:47:58	213] [0m Trial 89 finished with value: -9235.265625 and parameters: {'r_scaling': 0.07759063285418616	'unroll': 12	'update_epoch': 14	'discount': 0.9817502893600205	'lr': 0.0001716612516306105	'entropy': 0.01260937751225645}. Best is trial 85 with value: -10424.927734375. [0m
[32m[I 2022-01-11 02:55:44	106] [0m Trial 90 finished with value: -8042.72607421875 and parameters: {'r_scaling': 0.17220374220970358	'unroll': 10	'update_epoch': 14	'discount': 0.9817767672652125	'lr': 0.0001719808868804684	'entropy': 0.014010920073914992}. Best is trial 85 with value: -10424.927734375. [0m
[32m[I 2022-01-11 03:03:07	938] [0m Trial 91 finished with value: -8821.3046875 and parameters: {'r_scaling': 0.07613239149592557	'unroll': 12	'update_epoch': 14	'discount': 0.9800722428323934	'lr': 0.00017198734661069635	'entropy': 0.007292756961976198}. Best is trial 85 with value: -10424.927734375. [0m
[32m[I 2022-01-11 03:11:05	563] [0m Trial 92 finished with value: -8751.59765625 and parameters: {'r_scaling': 0.12915076301263367	'unroll': 11	'update_epoch': 14	'discount': 0.97337876392124	'lr': 0.00015547543849820308	'entropy': 0.013030057040602594}. Best is trial 85 with value: -10424.927734375. [0m
[32m[I 2022-01-11 03:18:16	797] [0m Trial 93 finished with value: -8377.923828125 and parameters: {'r_scaling': 0.05504373692470679	'unroll': 12	'update_epoch': 14	'discount': 0.9824807074174536	'lr': 0.00021396922644807828	'entropy': 0.01147225527486488}. Best is trial 85 with value: -10424.927734375. [0m
[32m[I 2022-01-11 03:26:02	977] [0m Trial 94 finished with value: -9708.189453125 and parameters: {'r_scaling': 0.1295208907358757	'unroll': 10	'update_epoch': 14	'discount': 0.975876985293909	'lr': 0.0001727994223547929	'entropy': 0.006826258929805089}. Best is trial 85 with value: -10424.927734375. [0m
[32m[I 2022-01-11 03:33:49	213] [0m Trial 95 finished with value: -3700.749267578125 and parameters: {'r_scaling': 0.1372671177174745	'unroll': 9	'update_epoch': 13	'discount': 0.9698735174398451	'lr': 0.00018517400293501142	'entropy': 0.016229391033684825}. Best is trial 85 with value: -10424.927734375. [0m
[32m[I 2022-01-11 03:41:24	423] [0m Trial 96 finished with value: -8005.0810546875 and parameters: {'r_scaling': 0.3205466476072799	'unroll': 10	'update_epoch': 14	'discount': 0.9750235710453656	'lr': 0.00016339328788515944	'entropy': 0.023369381220309085}. Best is trial 85 with value: -10424.927734375. [0m
[32m[I 2022-01-11 03:48:47	027] [0m Trial 97 finished with value: -3250.500244140625 and parameters: {'r_scaling': 0.07820549649464573	'unroll': 10	'update_epoch': 13	'discount': 0.965983007129816	'lr': 0.00021581599743800175	'entropy': 0.008562963497318605}. Best is trial 85 with value: -10424.927734375. [0m
[32m[I 2022-01-11 03:56:38	023] [0m Trial 98 finished with value: -9855.6025390625 and parameters: {'r_scaling': 0.10658515017800162	'unroll': 11	'update_epoch': 14	'discount': 0.977141721335086	'lr': 0.00017354935354916304	'entropy': 0.00685653244012642}. Best is trial 85 with value: -10424.927734375. [0m
[32m[I 2022-01-11 04:02:59	766] [0m Trial 99 finished with value: -5129.9326171875 and parameters: {'r_scaling': 0.17455331520670983	'unroll': 9	'update_epoch': 5	'discount': 0.9764846908685064	'lr': 0.0002409821664093304	'entropy': 0.0068316527115691245}. Best is trial 85 with value: -10424.927734375. [0m
[32m[I 2022-01-11 04:10:52	800] [0m Trial 100 finished with value: -9107.9365234375 and parameters: {'r_scaling': 0.05084979286608388	'unroll': 11	'update_epoch': 14	'discount': 0.9795781642668382	'lr': 0.00017340800853488935	'entropy': 0.00829111913938051}. Best is trial 85 with value: -10424.927734375. [0m
[32m[I 2022-01-11 04:19:17	079] [0m Trial 101 finished with value: -8954.7294921875 and parameters: {'r_scaling': 0.08077877420788417	'unroll': 11	'update_epoch': 14	'discount': 0.9790605486554887	'lr': 0.00017626735079539525	'entropy': 0.007879205288306835}. Best is trial 85 with value: -10424.927734375. [0m
[32m[I 2022-01-11 04:27:27	866] [0m Trial 102 finished with value: -5992.5068359375 and parameters: {'r_scaling': 0.11436249111935572	'unroll': 11	'update_epoch': 14	'discount': 0.9737417970268485	'lr': 0.00019105833701086946	'entropy': 0.006770752619555031}. Best is trial 85 with value: -10424.927734375. [0m
[32m[I 2022-01-11 04:34:58	389] [0m Trial 103 finished with value: -9494.6240234375 and parameters: {'r_scaling': 0.06729015421773593	'unroll': 10	'update_epoch': 13	'discount': 0.9831770117669077	'lr': 0.00013958767201365527	'entropy': 0.0038915543068865975}. Best is trial 85 with value: -10424.927734375. [0m
[32m[I 2022-01-11 04:42:19	353] [0m Trial 104 finished with value: -9602.8798828125 and parameters: {'r_scaling': 0.13035694421324517	'unroll': 10	'update_epoch': 13	'discount': 0.9840285290471067	'lr': 0.00014077977634339167	'entropy': 0.0038680947985576665}. Best is trial 85 with value: -10424.927734375. [0m
[32m[I 2022-01-11 04:49:40	213] [0m Trial 105 finished with value: -6537.3076171875 and parameters: {'r_scaling': 0.13798806094008187	'unroll': 10	'update_epoch': 13	'discount': 0.9865703111192453	'lr': 0.00013758137311009052	'entropy': 0.0028209473302613745}. Best is trial 85 with value: -10424.927734375. [0m
[32m[I 2022-01-11 04:57:44	179] [0m Trial 106 finished with value: -9709.30859375 and parameters: {'r_scaling': 0.18918587301855924	'unroll': 9	'update_epoch': 13	'discount': 0.9757198069700456	'lr': 0.0001580135265211512	'entropy': 0.005028482272687073}. Best is trial 85 with value: -10424.927734375. [0m
[32m[I 2022-01-11 05:05:32	866] [0m Trial 107 finished with value: -8468.671875 and parameters: {'r_scaling': 0.3581105657073125	'unroll': 9	'update_epoch': 13	'discount': 0.9759514823335126	'lr': 0.00016016199079624577	'entropy': 0.003873359395441698}. Best is trial 85 with value: -10424.927734375. [0m
[32m[I 2022-01-11 05:13:39	817] [0m Trial 108 finished with value: -7583.435546875 and parameters: {'r_scaling': 0.27942025402038345	'unroll': 9	'update_epoch': 13	'discount': 0.9839532882113172	'lr': 0.00019718743038445267	'entropy': 0.004063755661801034}. Best is trial 85 with value: -10424.927734375. [0m
[32m[I 2022-01-11 05:21:31	321] [0m Trial 109 finished with value: -2603.701904296875 and parameters: {'r_scaling': 0.4465178490590423	'unroll': 10	'update_epoch': 13	'discount': 0.9778194638942492	'lr': 0.00014114288644503386	'entropy': 0.004929610016133783}. Best is trial 85 with value: -10424.927734375. [0m
[32m[I 2022-01-11 05:29:01	458] [0m Trial 110 finished with value: -3914.10986328125 and parameters: {'r_scaling': 0.18929624108210938	'unroll': 10	'update_epoch': 13	'discount': 0.9805417653764741	'lr': 0.00015582078356594518	'entropy': 0.0034620069847112163}. Best is trial 85 with value: -10424.927734375. [0m
[32m[I 2022-01-11 05:36:41	110] [0m Trial 111 finished with value: -7906.44921875 and parameters: {'r_scaling': 0.06710723192970607	'unroll': 10	'update_epoch': 14	'discount': 0.9731550582927382	'lr': 0.0001495837947897005	'entropy': 0.006627774400554322}. Best is trial 85 with value: -10424.927734375. [0m
[32m[I 2022-01-11 05:44:35	550] [0m Trial 112 finished with value: -8059.42138671875 and parameters: {'r_scaling': 0.10243975787238134	'unroll': 11	'update_epoch': 14	'discount': 0.9834163575044798	'lr': 0.0001646305874070758	'entropy': 0.005396996956465518}. Best is trial 85 with value: -10424.927734375. [0m
[32m[I 2022-01-11 05:52:03	571] [0m Trial 113 finished with value: -8131.48486328125 and parameters: {'r_scaling': 0.129632109688309	'unroll': 10	'update_epoch': 13	'discount': 0.9762940314599883	'lr': 0.00019374815871040733	'entropy': 0.007774355729117254}. Best is trial 85 with value: -10424.927734375. [0m
[32m[I 2022-01-11 05:59:29	893] [0m Trial 114 finished with value: -9891.177734375 and parameters: {'r_scaling': 0.15410555563195635	'unroll': 9	'update_epoch': 14	'discount': 0.978390207225945	'lr': 0.00018249023622050274	'entropy': 0.009411353414306859}. Best is trial 85 with value: -10424.927734375. [0m
[32m[I 2022-01-11 06:07:05	241] [0m Trial 115 finished with value: -9427.5009765625 and parameters: {'r_scaling': 0.15897870640349474	'unroll': 9	'update_epoch': 12	'discount': 0.97850556887996	'lr': 0.00020986856847690085	'entropy': 0.009313274288303476}. Best is trial 85 with value: -10424.927734375. [0m
[32m[I 2022-01-11 06:15:06	899] [0m Trial 116 finished with value: -10191.32421875 and parameters: {'r_scaling': 0.16791543825235922	'unroll': 9	'update_epoch': 12	'discount': 0.9778785553293802	'lr': 0.00020571471568747523	'entropy': 0.004392212222738244}. Best is trial 85 with value: -10424.927734375. [0m
[32m[I 2022-01-11 06:23:23	439] [0m Trial 117 finished with value: -8954.205078125 and parameters: {'r_scaling': 0.1550420566160432	'unroll': 9	'update_epoch': 12	'discount': 0.9789143898351774	'lr': 0.00022538246589993928	'entropy': 0.0030584439302026836}. Best is trial 85 with value: -10424.927734375. [0m
[32m[I 2022-01-11 06:32:12	365] [0m Trial 118 finished with value: -1579.97216796875 and parameters: {'r_scaling': 0.6849145289164023	'unroll': 8	'update_epoch': 7	'discount': 0.9871032168097678	'lr': 0.0002061436648613915	'entropy': 0.004463521533361823}. Best is trial 85 with value: -10424.927734375. [0m
[32m[I 2022-01-11 06:43:41	125] [0m Trial 119 finished with value: -8016.65966796875 and parameters: {'r_scaling': 0.20857835464455834	'unroll': 9	'update_epoch': 12	'discount': 0.9751262284632544	'lr': 0.0002558745009336894	'entropy': 0.009138384484520786}. Best is trial 85 with value: -10424.927734375. [0m
[32m[I 2022-01-11 06:55:47	603] [0m Trial 120 finished with value: -9835.787109375 and parameters: {'r_scaling': 0.2825177331755713	'unroll': 9	'update_epoch': 12	'discount': 0.9844304497234281	'lr': 0.0001367910748398446	'entropy': 0.011172324901810703}. Best is trial 85 with value: -10424.927734375. [0m
[32m[I 2022-01-11 07:08:15	563] [0m Trial 121 finished with value: -10397.7041015625 and parameters: {'r_scaling': 0.28246683722271504	'unroll': 9	'update_epoch': 12	'discount': 0.9856726413643531	'lr': 0.0001371244800892729	'entropy': 0.011349290712887908}. Best is trial 85 with value: -10424.927734375. [0m
[32m[I 2022-01-11 07:19:44	705] [0m Trial 122 finished with value: -5351.859375 and parameters: {'r_scaling': 0.3196947226855033	'unroll': 8	'update_epoch': 13	'discount': 0.9844737032993433	'lr': 0.00013879301598657666	'entropy': 0.0037667165586624494}. Best is trial 85 with value: -10424.927734375. [0m
[32m[I 2022-01-11 07:27:52	585] [0m Trial 123 finished with value: -8846.427734375 and parameters: {'r_scaling': 0.2577240401792157	'unroll': 9	'update_epoch': 12	'discount': 0.9881844907035335	'lr': 0.00013426801336708063	'entropy': 0.011975242916333562}. Best is trial 85 with value: -10424.927734375. [0m
[32m[I 2022-01-11 07:35:52	174] [0m Trial 124 finished with value: -6949.65087890625 and parameters: {'r_scaling': 0.19912380460786858	'unroll': 9	'update_epoch': 11	'discount': 0.985684764117977	'lr': 0.0001158899030163716	'entropy': 0.010899979567128055}. Best is trial 85 with value: -10424.927734375. [0m
[32m[I 2022-01-11 07:47:07	078] [0m Trial 125 finished with value: -10354.3232421875 and parameters: {'r_scaling': 0.3003549039564319	'unroll': 8	'update_epoch': 13	'discount': 0.983462650902138	'lr': 0.00015714319193956152	'entropy': 0.01645075328175604}. Best is trial 85 with value: -10424.927734375. [0m
[32m[I 2022-01-11 07:58:28	741] [0m Trial 126 finished with value: -7938.72216796875 and parameters: {'r_scaling': 0.40777454947712155	'unroll': 8	'update_epoch': 12	'discount': 0.9726139584829767	'lr': 0.00018668859072240045	'entropy': 0.017695038798173558}. Best is trial 85 with value: -10424.927734375. [0m
[32m[I 2022-01-11 08:09:58	457] [0m Trial 127 finished with value: -8223.880859375 and parameters: {'r_scaling': 0.2907496865691321	'unroll': 8	'update_epoch': 13	'discount': 0.9803086044913863	'lr': 0.00016371760617685073	'entropy': 0.020356115332734816}. Best is trial 85 with value: -10424.927734375. [0m
[32m[I 2022-01-11 08:21:29	453] [0m Trial 128 finished with value: -1938.789306640625 and parameters: {'r_scaling': 0.23599578811395477	'unroll': 9	'update_epoch': 12	'discount': 0.943922951776786	'lr': 0.00012668995876352282	'entropy': 0.010235321129612365}. Best is trial 85 with value: -10424.927734375. [0m
[32m[I 2022-01-11 08:29:05	425] [0m Trial 129 finished with value: -5573.24853515625 and parameters: {'r_scaling': 0.3625425226731651	'unroll': 10	'update_epoch': 13	'discount': 0.9924660201033616	'lr': 0.0001517112229954934	'entropy': 0.01512410582492578}. Best is trial 85 with value: -10424.927734375. [0m
[32m[I 2022-01-11 08:36:53	538] [0m Trial 130 finished with value: -6442.21484375 and parameters: {'r_scaling': 0.5296107805910387	'unroll': 8	'update_epoch': 14	'discount': 0.9898801209839266	'lr': 0.00018037879312136093	'entropy': 0.013137870460994986}. Best is trial 85 with value: -10424.927734375. [0m
[32m[I 2022-01-11 08:48:16	946] [0m Trial 131 finished with value: -8347.5751953125 and parameters: {'r_scaling': 0.1862115762225301	'unroll': 10	'update_epoch': 13	'discount': 0.9835243823594624	'lr': 0.00014390586558038214	'entropy': 0.004980572773314869}. Best is trial 85 with value: -10424.927734375. [0m
[32m[I 2022-01-11 08:59:50	028] [0m Trial 132 finished with value: -8707.8583984375 and parameters: {'r_scaling': 0.11654420473625877	'unroll': 10	'update_epoch': 13	'discount': 0.9816693626493814	'lr': 0.000156255621995433	'entropy': 0.008352400132271842}. Best is trial 85 with value: -10424.927734375. [0m
[32m[I 2022-01-11 09:07:54	497] [0m Trial 133 finished with value: -4893.6708984375 and parameters: {'r_scaling': 0.24680476932346326	'unroll': 9	'update_epoch': 13	'discount': 0.9855905028236325	'lr': 0.00016671616025456157	'entropy': 0.006208982762650736}. Best is trial 85 with value: -10424.927734375. [0m
[32m[I 2022-01-11 09:20:49	066] [0m Trial 134 finished with value: -10136.89453125 and parameters: {'r_scaling': 0.14910077149533754	'unroll': 10	'update_epoch': 14	'discount': 0.9768647474510116	'lr': 0.00012316617616775564	'entropy': 0.004338611955094864}. Best is trial 85 with value: -10424.927734375. [0m
[32m[I 2022-01-11 09:34:54	242] [0m Trial 135 finished with value: -10569.40234375 and parameters: {'r_scaling': 0.16399388595809147	'unroll': 11	'update_epoch': 14	'discount': 0.9767019131652385	'lr': 0.00012273404595422764	'entropy': 0.00527808915153487}. Best is trial 135 with value: -10569.40234375. [0m
[32m[I 2022-01-11 09:49:03	133] [0m Trial 136 finished with value: -6233.53369140625 and parameters: {'r_scaling': 0.18320118297115645	'unroll': 11	'update_epoch': 14	'discount': 0.9747614007619035	'lr': 0.00011456332172437688	'entropy': 0.03294439945957339}. Best is trial 135 with value: -10569.40234375. [0m
[32m[I 2022-01-11 10:03:04	433] [0m Trial 137 finished with value: -3565.364013671875 and parameters: {'r_scaling': 2.4024953826148625	'unroll': 11	'update_epoch': 14	'discount': 0.9767678186176677	'lr': 0.00012320666436157454	'entropy': 0.00576525535982105}. Best is trial 135 with value: -10569.40234375. [0m
[32m[I 2022-01-11 10:11:33	615] [0m Trial 138 finished with value: -6193.919921875 and parameters: {'r_scaling': 0.1477452192391446	'unroll': 12	'update_epoch': 14	'discount': 0.9731186406733335	'lr': 0.00013412404957337303	'entropy': 0.007537379038613105}. Best is trial 135 with value: -10569.40234375. [0m
[32m[I 2022-01-11 10:19:55	668] [0m Trial 139 finished with value: -1055.3935546875 and parameters: {'r_scaling': 0.29033969512755936	'unroll': 12	'update_epoch': 14	'discount': 0.9783553140691024	'lr': 0.00012840470647686774	'entropy': 0.009305514345323462}. Best is trial 135 with value: -10569.40234375. [0m
[32m[I 2022-01-11 10:29:23	201] [0m Trial 140 finished with value: -9905.5205078125 and parameters: {'r_scaling': 0.21024843627532921	'unroll': 9	'update_epoch': 15	'discount': 0.9717740649958987	'lr': 0.0001097629706592058	'entropy': 0.005084369209367672}. Best is trial 135 with value: -10569.40234375. [0m
[32m[I 2022-01-11 10:38:49	309] [0m Trial 141 finished with value: -9442.814453125 and parameters: {'r_scaling': 0.2208718211089252	'unroll': 9	'update_epoch': 15	'discount': 0.9723291757187754	'lr': 0.00010754846122051743	'entropy': 0.00503265232689517}. Best is trial 135 with value: -10569.40234375. [0m
[32m[I 2022-01-11 10:47:54	679] [0m Trial 142 finished with value: -6781.17138671875 and parameters: {'r_scaling': 0.42500385531221263	'unroll': 8	'update_epoch': 15	'discount': 0.9755761824419749	'lr': 0.0001200936718850528	'entropy': 0.006557475907504435}. Best is trial 135 with value: -10569.40234375. [0m
[32m[I 2022-01-11 10:57:16	282] [0m Trial 143 finished with value: -6408.58056640625 and parameters: {'r_scaling': 0.1567331150313114	'unroll': 9	'update_epoch': 15	'discount': 0.9684788354783006	'lr': 0.00015226895811932924	'entropy': 0.011443110973557314}. Best is trial 135 with value: -10569.40234375. [0m
[32m[I 2022-01-11 11:06:54	796] [0m Trial 144 finished with value: -9138.3076171875 and parameters: {'r_scaling': 0.2198664075591001	'unroll': 11	'update_epoch': 14	'discount': 0.980201166744661	'lr': 0.00017067758921933857	'entropy': 0.004325939174575541}. Best is trial 135 with value: -10569.40234375. [0m
[32m[I 2022-01-11 11:15:56	578] [0m Trial 145 finished with value: -3237.72265625 and parameters: {'r_scaling': 0.31561451443195254	'unroll': 8	'update_epoch': 15	'discount': 0.9774056341338893	'lr': 0.00018639067358103203	'entropy': 0.0077136918431201405}. Best is trial 135 with value: -10569.40234375. [0m
[32m[I 2022-01-11 11:25:04	562] [0m Trial 146 finished with value: -9724.98046875 and parameters: {'r_scaling': 0.17491976408932336	'unroll': 9	'update_epoch': 14	'discount': 0.9708885441753641	'lr': 0.00016115919806685078	'entropy': 0.0053975144783084935}. Best is trial 135 with value: -10569.40234375. [0m
[32m[I 2022-01-11 11:34:10	354] [0m Trial 147 finished with value: -8633.5205078125 and parameters: {'r_scaling': 0.26457631533149994	'unroll': 7	'update_epoch': 14	'discount': 0.971201194242294	'lr': 0.00011312856082102279	'entropy': 0.005270439600442909}. Best is trial 135 with value: -10569.40234375. [0m
[32m[I 2022-01-11 11:43:34	868] [0m Trial 148 finished with value: -3445.0009765625 and parameters: {'r_scaling': 0.17039002808957995	'unroll': 9	'update_epoch': 15	'discount': 0.9631109546498265	'lr': 0.00015859667479740878	'entropy': 0.015050840021575659}. Best is trial 135 with value: -10569.40234375. [0m
[32m[I 2022-01-11 11:52:15	704] [0m Trial 149 finished with value: -5952.34130859375 and parameters: {'r_scaling': 0.19678731600865831	'unroll': 9	'update_epoch': 11	'discount': 0.9671180670816687	'lr': 0.00014565338791096107	'entropy': 0.004718158268928569}. Best is trial 135 with value: -10569.40234375. [0m
[32m[I 2022-01-11 12:06:09	696] [0m Trial 150 finished with value: -9426.876953125 and parameters: {'r_scaling': 0.10499800042654657	'unroll': 11	'update_epoch': 14	'discount': 0.9746772371761222	'lr': 0.00012351001250037025	'entropy': 0.005945102243190014}. Best is trial 135 with value: -10569.40234375. [0m
[32m[I 2022-01-11 12:14:59	598] [0m Trial 151 finished with value: -8837.9296875 and parameters: {'r_scaling': 0.1316054184849738	'unroll': 10	'update_epoch': 14	'discount': 0.9801080167624557	'lr': 0.00013228937970449984	'entropy': 0.0070215735798206625}. Best is trial 135 with value: -10569.40234375. [0m
[32m[I 2022-01-11 12:24:19	840] [0m Trial 152 finished with value: -1665.954345703125 and parameters: {'r_scaling': 4.716857470264924	'unroll': 9	'update_epoch': 14	'discount': 0.9715361231228157	'lr': 0.00017254547463449015	'entropy': 0.008687609179266316}. Best is trial 135 with value: -10569.40234375. [0m
[32m[I 2022-01-11 12:33:11	111] [0m Trial 153 finished with value: -5705.28515625 and parameters: {'r_scaling': 0.1696876428630193	'unroll': 12	'update_epoch': 15	'discount': 0.9694745315115798	'lr': 0.00019893944138355384	'entropy': 0.010390326910587088}. Best is trial 135 with value: -10569.40234375. [0m
[32m[I 2022-01-11 12:41:55	702] [0m Trial 154 finished with value: -2407.015380859375 and parameters: {'r_scaling': 1.326571586536537	'unroll': 10	'update_epoch': 14	'discount': 0.976870399971217	'lr': 0.00016029625237813538	'entropy': 0.005765419946049086}. Best is trial 135 with value: -10569.40234375. [0m
[32m[I 2022-01-11 12:50:46	649] [0m Trial 155 finished with value: -9417.041015625 and parameters: {'r_scaling': 0.22870337183438919	'unroll': 8	'update_epoch': 14	'discount': 0.9820139759952659	'lr': 0.00018165647237804384	'entropy': 0.0044831507931915125}. Best is trial 135 with value: -10569.40234375. [0m
[32m[I 2022-01-11 13:00:01	745] [0m Trial 156 finished with value: -7372.12158203125 and parameters: {'r_scaling': 0.14288231668708448	'unroll': 11	'update_epoch': 15	'discount': 0.9749127648119257	'lr': 0.00014940579374929985	'entropy': 0.003196208735599654}. Best is trial 135 with value: -10569.40234375. [0m
[32m[I 2022-01-11 13:08:43	504] [0m Trial 157 finished with value: -7520.77587890625 and parameters: {'r_scaling': 0.12279027822836544	'unroll': 10	'update_epoch': 13	'discount': 0.978494356731959	'lr': 0.00010791211854316081	'entropy': 0.006814605533585324}. Best is trial 135 with value: -10569.40234375. [0m
[32m[I 2022-01-11 13:17:56	965] [0m Trial 158 finished with value: -10476.765625 and parameters: {'r_scaling': 0.3293433064315797	'unroll': 9	'update_epoch': 14	'discount': 0.9735332913167839	'lr': 0.00016775437495845287	'entropy': 0.00792134096112155}. Best is trial 135 with value: -10569.40234375. [0m
[32m[I 2022-01-11 13:27:16	937] [0m Trial 159 finished with value: -9399.07421875 and parameters: {'r_scaling': 0.35947399892257204	'unroll': 9	'update_epoch': 15	'discount': 0.9741073896204243	'lr': 0.00014343019486396313	'entropy': 0.01225876032769342}. Best is trial 135 with value: -10569.40234375. [0m
[32m[I 2022-01-11 13:36:21	498] [0m Trial 160 finished with value: -8114.37744140625 and parameters: {'r_scaling': 0.2816099590197936	'unroll': 9	'update_epoch': 13	'discount': 0.9699192064741492	'lr': 0.00016514506940662105	'entropy': 0.007963769806380097}. Best is trial 135 with value: -10569.40234375. [0m
[32m[I 2022-01-11 13:45:15	790] [0m Trial 161 finished with value: -6599.60400390625 and parameters: {'r_scaling': 0.2022207243690904	'unroll': 8	'update_epoch': 14	'discount': 0.976444951908293	'lr': 0.00017859221412927915	'entropy': 0.009627303906003424}. Best is trial 135 with value: -10569.40234375. [0m
[32m[I 2022-01-11 13:54:49	136] [0m Trial 162 finished with value: -9839.533203125 and parameters: {'r_scaling': 0.09345009886338472	'unroll': 11	'update_epoch': 14	'discount': 0.9728564108811402	'lr': 0.00019537212495144158	'entropy': 0.005343590520985297}. Best is trial 135 with value: -10569.40234375. [0m
[32m[I 2022-01-11 14:04:01	154] [0m Trial 163 finished with value: -8167.65380859375 and parameters: {'r_scaling': 0.08894825637157969	'unroll': 11	'update_epoch': 14	'discount': 0.9655081705722252	'lr': 0.00022366917126755704	'entropy': 0.005241728924677526}. Best is trial 135 with value: -10569.40234375. [0m
[32m[I 2022-01-11 14:12:58	317] [0m Trial 164 finished with value: -6122.43798828125 and parameters: {'r_scaling': 0.4592300755701449	'unroll': 11	'update_epoch': 14	'discount': 0.9733418422567017	'lr': 0.0001953337255984391	'entropy': 0.07452135702402772}. Best is trial 135 with value: -10569.40234375. [0m
[32m[I 2022-01-11 14:21:27	828] [0m Trial 165 finished with value: -8681.19140625 and parameters: {'r_scaling': 0.33092337371851155	'unroll': 9	'update_epoch': 12	'discount': 0.9716794418608321	'lr': 0.00013722893749639321	'entropy': 0.006073528983576171}. Best is trial 135 with value: -10569.40234375. [0m
[32m[I 2022-01-11 14:29:31	554] [0m Trial 166 finished with value: -2622.97607421875 and parameters: {'r_scaling': 0.2614975956941014	'unroll': 12	'update_epoch': 15	'discount': 0.9788750093839137	'lr': 0.0001547606809978317	'entropy': 0.004159430485282186}. Best is trial 135 with value: -10569.40234375. [0m
[32m[I 2022-01-11 14:38:18	458] [0m Trial 167 finished with value: -8474.689453125 and parameters: {'r_scaling': 0.17147678911389588	'unroll': 11	'update_epoch': 14	'discount': 0.981934366627411	'lr': 0.0001636585589638026	'entropy': 0.007639993028612586}. Best is trial 135 with value: -10569.40234375. [0m
[32m[I 2022-01-11 14:50:49	101] [0m Trial 168 finished with value: -5504.40625 and parameters: {'r_scaling': 0.10949356864601123	'unroll': 9	'update_epoch': 13	'discount': 0.9683373316201234	'lr': 0.0001865920007156822	'entropy': 0.0048609267986941}. Best is trial 135 with value: -10569.40234375. [0m
[32m[I 2022-01-11 15:02:33	190] [0m Trial 169 finished with value: -1437.5487060546875 and parameters: {'r_scaling': 0.2347232959772082	'unroll': 10	'update_epoch': 15	'discount': 0.9054376316460429	'lr': 0.00020850184664454997	'entropy': 0.0035437600592093063}. Best is trial 135 with value: -10569.40234375. [0m
[32m[I 2022-01-11 15:09:40	200] [0m Trial 170 finished with value: -1394.8197021484375 and parameters: {'r_scaling': 0.14976654407525386	'unroll': 8	'update_epoch': 9	'discount': 0.9238297380107809	'lr': 0.00013273054108158957	'entropy': 0.008798142157820883}. Best is trial 135 with value: -10569.40234375. [0m
[32m[I 2022-01-11 15:17:27	435] [0m Trial 171 finished with value: -7798.4658203125 and parameters: {'r_scaling': 0.09749644521275411	'unroll': 10	'update_epoch': 14	'discount': 0.9761880843115259	'lr': 0.00017233702965207463	'entropy': 0.006495635251406725}. Best is trial 135 with value: -10569.40234375. [0m
[32m[I 2022-01-11 15:25:55	784] [0m Trial 172 finished with value: -1907.34765625 and parameters: {'r_scaling': 0.12693663514910866	'unroll': 11	'update_epoch': 14	'discount': 0.9340804154460771	'lr': 0.00015106662670279875	'entropy': 0.005420370650071595}. Best is trial 135 with value: -10569.40234375. [0m
[32m[I 2022-01-11 15:34:10	411] [0m Trial 173 finished with value: -8491.7158203125 and parameters: {'r_scaling': 0.19223939827219255	'unroll': 9	'update_epoch': 14	'discount': 0.9733282445083632	'lr': 0.00017371474743604478	'entropy': 0.006979445349931818}. Best is trial 135 with value: -10569.40234375. [0m
[32m[I 2022-01-11 15:42:07	221] [0m Trial 174 finished with value: -1270.896484375 and parameters: {'r_scaling': 12.250734230660617	'unroll': 10	'update_epoch': 14	'discount': 0.9802088727070687	'lr': 0.0001949950005989698	'entropy': 0.006121277052528759}. Best is trial 135 with value: -10569.40234375. [0m
[32m[I 2022-01-11 15:50:11	197] [0m Trial 175 finished with value: -2222.001708984375 and parameters: {'r_scaling': 0.6446129697348716	'unroll': 11	'update_epoch': 13	'discount': 0.9767878609581213	'lr': 0.00015846985053829634	'entropy': 0.009757576725159934}. Best is trial 135 with value: -10569.40234375. [0m
[32m[I 2022-01-11 15:57:52	087] [0m Trial 176 finished with value: -7594.1787109375 and parameters: {'r_scaling': 0.37889782640217945	'unroll': 10	'update_epoch': 13	'discount': 0.9779036740438453	'lr': 0.00012071802445215787	'entropy': 0.008374604601167611}. Best is trial 135 with value: -10569.40234375. [0m
[32m[I 2022-01-11 16:04:16	434] [0m Trial 177 finished with value: -2191.177001953125 and parameters: {'r_scaling': 0.0883808572263344	'unroll': 9	'update_epoch': 3	'discount': 0.974449643957934	'lr': 0.0008829604222001394	'entropy': 0.02423610451252612}. Best is trial 135 with value: -10569.40234375. [0m
[32m[I 2022-01-11 16:12:08	585] [0m Trial 178 finished with value: -8195.3388671875 and parameters: {'r_scaling': 0.15451389139617927	'unroll': 11	'update_epoch': 12	'discount': 0.9704670021538866	'lr': 0.00016689298138498	'entropy': 0.00456769962752753}. Best is trial 135 with value: -10569.40234375. [0m
[32m[I 2022-01-11 16:19:44	398] [0m Trial 179 finished with value: -1088.615234375 and parameters: {'r_scaling': 0.11091639566957147	'unroll': 12	'update_epoch': 15	'discount': 0.9875788396678785	'lr': 0.0016921941830445565	'entropy': 0.00741119429965949}. Best is trial 135 with value: -10569.40234375. [0m
[32m[I 2022-01-11 16:30:48	621] [0m Trial 180 finished with value: -7661.2412109375 and parameters: {'r_scaling': 0.2017656019494548	'unroll': 7	'update_epoch': 8	'discount': 0.9803290184972723	'lr': 0.00024009110007328676	'entropy': 0.011589129025365935}. Best is trial 135 with value: -10569.40234375. [0m
[32m[I 2022-01-11 16:42:57	023] [0m Trial 181 finished with value: -3656.8798828125 and parameters: {'r_scaling': 0.24176318069432104	'unroll': 10	'update_epoch': 13	'discount': 0.9835923692953219	'lr': 0.00013863172783985643	'entropy': 0.003640679363845405}. Best is trial 135 with value: -10569.40234375. [0m
[32m[I 2022-01-11 16:50:54	171] [0m Trial 182 finished with value: -6536.2490234375 and parameters: {'r_scaling': 0.13024406871021116	'unroll': 10	'update_epoch': 14	'discount': 0.9858887072922581	'lr': 0.00012776060011887686	'entropy': 0.004059056890444309}. Best is trial 135 with value: -10569.40234375. [0m
[32m[I 2022-01-11 16:57:48	372] [0m Trial 183 finished with value: -8141.6201171875 and parameters: {'r_scaling': 0.17239443610645971	'unroll': 9	'update_epoch': 6	'discount': 0.9830945715640172	'lr': 0.00014354077022409725	'entropy': 0.002751500558554403}. Best is trial 135 with value: -10569.40234375. [0m
[32m[I 2022-01-11 17:05:31	299] [0m Trial 184 finished with value: -8142.01904296875 and parameters: {'r_scaling': 0.1372072836889128	'unroll': 10	'update_epoch': 13	'discount': 0.9787465118306435	'lr': 0.0001451404838028027	'entropy': 0.005164371197167315}. Best is trial 135 with value: -10569.40234375. [0m
[32m[I 2022-01-11 17:13:23	130] [0m Trial 185 finished with value: -9857.07421875 and parameters: {'r_scaling': 0.29978753124017915	'unroll': 11	'update_epoch': 12	'discount': 0.9751912652743013	'lr': 0.00017995255505808713	'entropy': 0.005744981732570878}. Best is trial 135 with value: -10569.40234375. [0m
[32m[I 2022-01-11 17:21:08	137] [0m Trial 186 finished with value: -7048.232421875 and parameters: {'r_scaling': 0.29432765786671805	'unroll': 11	'update_epoch': 12	'discount': 0.9721617208189943	'lr': 0.00018046620769941447	'entropy': 0.00550848020662696}. Best is trial 135 with value: -10569.40234375. [0m
[32m[I 2022-01-11 17:28:48	536] [0m Trial 187 finished with value: -5946.099609375 and parameters: {'r_scaling': 0.3257499716881725	'unroll': 11	'update_epoch': 11	'discount': 0.975151481589537	'lr': 0.00018969660046396232	'entropy': 0.006339630745695449}. Best is trial 135 with value: -10569.40234375. [0m
[32m[I 2022-01-11 17:36:36	868] [0m Trial 188 finished with value: -5535.77587890625 and parameters: {'r_scaling': 0.2243380061682402	'unroll': 11	'update_epoch': 12	'discount': 0.9755620216373643	'lr': 0.000203374075270034	'entropy': 0.007243414781005132}. Best is trial 135 with value: -10569.40234375. [0m
[32m[I 2022-01-11 17:44:02	068] [0m Trial 189 finished with value: -6753.43017578125 and parameters: {'r_scaling': 0.39495742302308323	'unroll': 12	'update_epoch': 14	'discount': 0.9732910174854589	'lr': 0.00015871992490445972	'entropy': 0.0189906457923073}. Best is trial 135 with value: -10569.40234375. [0m
[32m[I 2022-01-11 17:52:16	311] [0m Trial 190 finished with value: -9239.400390625 and parameters: {'r_scaling': 0.07673859138273556	'unroll': 9	'update_epoch': 14	'discount': 0.9768808847125249	'lr': 0.00017822709374708492	'entropy': 0.010374614443770188}. Best is trial 135 with value: -10569.40234375. [0m
[32m[I 2022-01-11 18:00:24	465] [0m Trial 191 finished with value: -10022.5 and parameters: {'r_scaling': 0.11746525098930895	'unroll': 11	'update_epoch': 12	'discount': 0.9810284094454339	'lr': 0.00015098459318769653	'entropy': 0.0044991627958254595}. Best is trial 135 with value: -10569.40234375. [0m
[32m[I 2022-01-11 18:08:17	390] [0m Trial 192 finished with value: -7786.19091796875 and parameters: {'r_scaling': 0.09886462840292201	'unroll': 11	'update_epoch': 12	'discount': 0.9812376739073527	'lr': 0.00016513019257805183	'entropy': 0.004670437129367547}. Best is trial 135 with value: -10569.40234375. [0m
[32m[I 2022-01-11 18:15:57	095] [0m Trial 193 finished with value: -6453.7509765625 and parameters: {'r_scaling': 0.2719733082716391	'unroll': 11	'update_epoch': 11	'discount': 0.9787659929614849	'lr': 0.00015280438595041056	'entropy': 0.00564629549161397}. Best is trial 135 with value: -10569.40234375. [0m
[32m[I 2022-01-11 18:23:11	071] [0m Trial 194 finished with value: -7171.62890625 and parameters: {'r_scaling': 0.16922708661218402	'unroll': 12	'update_epoch': 12	'discount': 0.9781811616731242	'lr': 0.00017225789692667853	'entropy': 0.006537835429325317}. Best is trial 135 with value: -10569.40234375. [0m
[32m[I 2022-01-11 18:31:05	675] [0m Trial 195 finished with value: -8257.326171875 and parameters: {'r_scaling': 0.11956996618125501	'unroll': 11	'update_epoch': 12	'discount': 0.9717130712062705	'lr': 0.000158686822161967	'entropy': 0.008222698477815767}. Best is trial 135 with value: -10569.40234375. [0m
[32m[I 2022-01-11 18:42:47	115] [0m Trial 196 finished with value: -8675.6826171875 and parameters: {'r_scaling': 0.21377558804319122	'unroll': 9	'update_epoch': 10	'discount': 0.9804305348753518	'lr': 0.00018657256482871698	'entropy': 0.004685158611247556}. Best is trial 135 with value: -10569.40234375. [0m
[32m[I 2022-01-11 18:51:06	218] [0m Trial 197 finished with value: -9519.109375 and parameters: {'r_scaling': 0.14089082791356664	'unroll': 11	'update_epoch': 14	'discount': 0.974596817353756	'lr': 0.00012742146941868102	'entropy': 0.005833426442733285}. Best is trial 135 with value: -10569.40234375. [0m
[32m[I 2022-01-11 18:58:58	683] [0m Trial 198 finished with value: -8352.560546875 and parameters: {'r_scaling': 0.19691732181397759	'unroll': 8	'update_epoch': 14	'discount': 0.9767963891432857	'lr': 0.00011545912445242058	'entropy': 0.014084537113473091}. Best is trial 135 with value: -10569.40234375. [0m
[32m[I 2022-01-11 19:06:45	499] [0m Trial 199 finished with value: -8925.8701171875 and parameters: {'r_scaling': 0.0909114682900764	'unroll': 9	'update_epoch': 11	'discount': 0.9825917033162516	'lr': 0.00014865688304572012	'entropy': 0.007324381807009843}. Best is trial 135 with value: -10569.40234375. [0m
