# Supplementary material
Source: ML conference proceedings conference paper supplement (https://proceedings.neurips.cc/paper_files/paper/2022/hash/10a6bdcabbd5a3d36b760daa295f63c1-Abstract.html)
Supplement: Supplementary file 1 [file 10a6bdcabbd5a3d36b760daa295f63c1-Supplemental-Conference.zip › neurips2022/code/robotics_code/our_ppo.py]

# Copyright 2021 The Brax Authors.
#
# Licensed under the Apache License, Version 2.0 (the "License");
# you may not use this file except in compliance with the License.
# You may obtain a copy of the License at
#
#     http://www.apache.org/licenses/LICENSE-2.0
#
# Unless required by applicable law or agreed to in writing, software
# distributed under the License is distributed on an "AS IS" BASIS,
# WITHOUT WARRANTIES OR CONDITIONS OF ANY KIND, either express or implied.
# See the License for the specific language governing permissions and
# limitations under the License.

"""Proximal policy optimization training.

See: https://arxiv.org/pdf/1707.06347.pdf
"""

import functools
import time
from typing import Any, Callable, Dict, Optional, Tuple

from absl import logging
from brax import envs
from brax.training import distribution
from brax.training import pmap
from brax.training.types import Params
from brax.training.types import PRNGKey
import flax
import jax
import jax.numpy as jnp
import optax

import our_env
import our_networks
import our_normalization
import reward_network
from configs import Configuration

def compute_gae(truncation: jnp.ndarray,
                termination: jnp.ndarray,
                rewards: jnp.ndarray,
                values: jnp.ndarray,
                bootstrap_value: jnp.ndarray,
                lambda_: float = 1.0,
                discount: float = 0.99):
  r"""Calculates the Generalized Advantage Estimation (GAE).

  Args:
    truncation: A float32 tensor of shape [T, B] with truncation signal.
    termination: A float32 tensor of shape [T, B] with termination signal.
    rewards: A float32 tensor of shape [T, B] containing rewards generated by
      following the behaviour policy.
    values: A float32 tensor of shape [T, B] with the value function estimates
      wrt. the target policy.
    bootstrap_value: A float32 of shape [B] with the value function estimate at
      time T.
    lambda_: Mix between 1-step (lambda_=0) and n-step (lambda_=1). Defaults to
      lambda_=1.
    discount: TD discount.

  Returns:
    A float32 tensor of shape [T, B]. Can be used as target to
      train a baseline (V(x_t) - vs_t)^2.
    A float32 tensor of shape [T, B] of advantages.
  """

  truncation_mask = 1 - truncation
  # Append bootstrapped value to get [v1, ..., v_t+1]
  values_t_plus_1 = jnp.concatenate(
      [values[1:], jnp.expand_dims(bootstrap_value, 0)], axis=0)
  deltas = rewards + discount * (1 - termination) * values_t_plus_1 - values
  deltas *= truncation_mask

  acc = jnp.zeros_like(bootstrap_value)
  vs_minus_v_xs = []

  def compute_vs_minus_v_xs(carry, target_t):
    lambda_, acc = carry
    truncation_mask, delta, termination = target_t
    acc = delta + discount * (1 - termination) * truncation_mask * lambda_ * acc
    return (lambda_, acc), (acc)

  (_, _), (vs_minus_v_xs) = jax.lax.scan(compute_vs_minus_v_xs, (lambda_, acc),
                                         (truncation_mask, deltas, termination),
                                         length=int(truncation_mask.shape[0]),
                                         reverse=True)
  # Add V(x_s) to get v_s.
  vs = jnp.add(vs_minus_v_xs, values)

  vs_t_plus_1 = jnp.concatenate(
      [vs[1:], jnp.expand_dims(bootstrap_value, 0)], axis=0)
  advantages = (rewards + discount *
                (1 - termination) * vs_t_plus_1 - values) * truncation_mask
  return jax.lax.stop_gradient(vs), jax.lax.stop_gradient(advantages)


@flax.struct.dataclass
class StepData:
  """Contains data for one environment step."""
  obs: jnp.ndarray
  rewards: jnp.ndarray
  dones: jnp.ndarray
  truncation: jnp.ndarray
  actions: jnp.ndarray
  logits: jnp.ndarray


@flax.struct.dataclass
class TrainingState:
  """Contains training state for the learner."""
  optimizer_state: optax.OptState
  params: Params
  key: PRNGKey
  normalizer_params: Params


def compute_ppo_loss(
    models: Dict[str, Params],
    data: StepData,
    rng: jnp.ndarray,
    parametric_action_distribution: distribution.ParametricDistribution,
    policy_apply: Any,
    value_apply: Any,
    entropy_cost: float = 1e-4,
    discounting: float = 0.9,
    reward_scaling: float = 1.0,
    lambda_: float = 0.95,
    ppo_epsilon: float = 0.3):
  """Computes PPO loss."""
  policy_params, value_params = models['policy'], models['value']
  policy_logits = policy_apply(policy_params, data.obs[:-1])
  baseline = value_apply(value_params, data.obs)
  baseline = jnp.squeeze(baseline, axis=-1)

  # Use last baseline value (from the value function) to bootstrap.
  bootstrap_value = baseline[-1]
  baseline = baseline[:-1]

  # At this point, we have unroll length + 1 steps. The last step is only used
  # as bootstrap value, so it's removed.

  # already removed at data generation time
  # actions = actions[:-1]
  # logits = logits[:-1]

  rewards = data.rewards[1:] * reward_scaling
  truncation = data.truncation[1:]
  termination = data.dones[1:] * (1 - truncation)

  target_action_log_probs = parametric_action_distribution.log_prob(
      policy_logits, data.actions)
  behaviour_action_log_probs = parametric_action_distribution.log_prob(
      data.logits, data.actions)

  vs, advantages = compute_gae(
      truncation=truncation,
      termination=termination,
      rewards=rewards,
      values=baseline,
      bootstrap_value=bootstrap_value,
      lambda_=lambda_,
      discount=discounting)
  rho_s = jnp.exp(target_action_log_probs - behaviour_action_log_probs)

  surrogate_loss1 = rho_s * advantages
  surrogate_loss2 = jnp.clip(rho_s, 1 - ppo_epsilon,
                             1 + ppo_epsilon) * advantages

  policy_loss = -jnp.mean(jnp.minimum(surrogate_loss1, surrogate_loss2))

  # Value function loss
  v_error = vs - baseline
  v_loss = jnp.mean(v_error * v_error) * 0.5 * 0.5

  # Entropy reward
  entropy = jnp.mean(
      parametric_action_distribution.entropy(policy_logits, rng))
  entropy_loss = entropy_cost * -entropy

  return policy_loss + v_loss + entropy_loss, {
      'total_loss': policy_loss + v_loss + entropy_loss,
      'policy_loss': policy_loss,
      'v_loss': v_loss,
      'entropy_loss': entropy_loss
  }


def train(
    environment_fn: Callable[..., envs.Env],
    num_timesteps,
    episode_length: int,
    action_repeat: int = 1,
    num_envs: int = 1,
    max_devices_per_host: Optional[int] = None,
    num_eval_envs: int = 128,
    init_params = (None, None, None),
    learning_rate=1e-4,
    entropy_cost=1e-4,
    discounting=0.9,
    seed=0,
    unroll_length=10,
    batch_size=32,
    num_minibatches=16,
    num_update_epochs=2,
    log_frequency=10,
    normalize_observations=False,
    reward_scaling=1.,
    reward_fn=None,
    progress_fn: Optional[Callable[[int, Dict[str, Any]], None]] = None,
    body_lr_factor = 1,
    l2_decay = 0
):
  """PPO training."""
  assert batch_size * num_minibatches % num_envs == 0
  xt = time.time()

  process_count = jax.process_count()
  process_id = jax.process_index()
  local_device_count = jax.local_device_count()
  local_devices_to_use = local_device_count
  if max_devices_per_host:
      local_devices_to_use = min(local_devices_to_use, max_devices_per_host)
  logging.info(
      'Device count: %d, process count: %d (id %d), local device count: %d, '
      'devices to be used count: %d',
      jax.device_count(), process_count, process_id, local_device_count,
      local_devices_to_use)

  key = jax.random.PRNGKey(seed)
  key, key_models, key_env, key_eval = jax.random.split(key, 4)
  # Make sure every process gets a different random key, otherwise they will be
  # doing identical work.
  key_env = jax.random.split(key_env, process_count)[process_id]
  key = jax.random.split(key, process_count)[process_id]
  # key_models should be the same, so that models are initialized the same way
  # for different processes

  core_env = environment_fn(
      action_repeat=action_repeat,
      batch_size=num_envs // local_devices_to_use // process_count,
      episode_length=episode_length)
  if reward_fn is not None:
    reward_network.modify_env(core_env, 
                                 reward_fn, test=False)

  key_envs = jax.random.split(key_env, local_devices_to_use)
  step_fn = jax.jit(core_env.step)
  reset_fn = jax.jit(jax.vmap(core_env.reset), backend='cpu')

  # We assume there is a single device
  assert len(jax.devices()) == 1
  first_state = reset_fn(key_envs)
  first_state = jax.device_put(first_state, 
                               jax.devices()[0]) # Reset runs on CPU

  core_eval_env = environment_fn(
      action_repeat=action_repeat,
      batch_size=num_eval_envs,
      episode_length=episode_length)
  if reward_fn is not None:
    reward_network.modify_env(core_eval_env, 
                                 reward_fn, test=True)
    

  eval_first_state, eval_step_fn = our_env.wrap_for_eval(core_eval_env,
                                                         key_eval)

  parametric_action_distribution = distribution.NormalTanhDistribution(
      event_size=core_env.action_size)

  policy_model, value_model = our_networks.make_models(
      parametric_action_distribution.param_size,
      core_env.observation_size)
  key_policy, key_value = jax.random.split(key_models)

  init_normalizer_params, init_policy_params, init_value_params  = init_params

  init_agent_params = {'policy': policy_model.init(key_policy),
                        'value': value_model.init(key_value)} 
  if init_policy_params is not None:
    init_agent_params['policy'] = init_policy_params
  if init_value_params is not None:
    init_agent_params['value'] = init_value_params  
  
  normalizer_params, obs_normalizer_update_fn, obs_normalizer_apply_fn = (
      our_normalization.create_observation_normalizer(
          core_env.observation_size, normalize_observations,
          num_leading_batch_dims = 2, 
          pmap_to_devices=local_devices_to_use,
          multitasking=Configuration.multitask_learning,
          task_n=1 + len(Configuration.multitask_ids)))

  if init_normalizer_params is not None:
    # Add pmapped dimension
    normalizer_params = jax.tree_map(lambda x: jnp.repeat(x[None],
                                                          local_devices_to_use,
                                                           axis=0),
                                     init_normalizer_params)
  
  # The mask is generated with tree_map, so we can only look at the shape
  # to decide if a parameter belongs to the head/body. It's a bit hacky...
  def is_head(p):
    if len(p.shape) >= 2: #Ignore biases, they don't matter much anyway
      if p.shape[-2] == Configuration.ppo_value_layers[-2]\
         and p.shape[-1] == 1: #Value network
        return True
      policy_output_size = parametric_action_distribution.param_size
      if p.shape[-2] == Configuration.ppo_policy_layers[-1] \
        and p.shape[1] == policy_output_size: #Policy network
        return True
    return False

  def is_body(p):
    return not is_head(p)

  head_mask = functools.partial(jax.tree_map, is_head)
  body_mask = functools.partial(jax.tree_map, is_body)
  body_lr = learning_rate * body_lr_factor

  optimizer_head = optax.masked(optax.adamw(learning_rate=learning_rate,
                                       weight_decay=l2_decay),
                                mask=head_mask)
  optimizer_body = optax.masked(optax.adamw(learning_rate=body_lr,
                                       weight_decay=l2_decay),
                                 mask=body_mask) 

  optimizer = optax.chain(optimizer_head, optimizer_body)
  optimizer_state = optimizer.init(init_agent_params)
  optimizer_state, init_agent_params = pmap.bcast_local_devices(
      (optimizer_state, init_agent_params), local_devices_to_use)

  # Make sure we got just two parameters for the head
  assert len(optimizer_state[0].inner_state[0].mu) == 2

  key_debug = jax.random.PRNGKey(seed + 666)

  loss_fn = functools.partial(
      compute_ppo_loss,
      parametric_action_distribution=parametric_action_distribution,
      policy_apply=policy_model.apply,
      value_apply=value_model.apply,
      entropy_cost=entropy_cost,
      discounting=discounting,
      reward_scaling=reward_scaling)

  grad_loss = jax.grad(loss_fn, has_aux=True)

  def do_one_step_eval(carry, unused_target_t):
    state, policy_params, normalizer_params, key = carry
    key, key_sample = jax.random.split(key)
    # TODO: Make this nicer ([0] comes from pmapping).
    obs = obs_normalizer_apply_fn(
        jax.tree_map(lambda x: x[0], normalizer_params), state.core.obs)
    logits = policy_model.apply(policy_params, obs)
    actions = parametric_action_distribution.sample(logits, key_sample)
    nstate = eval_step_fn(state, actions)
    return (nstate, policy_params, normalizer_params, key), ()

  
  def run_eval(state, key, policy_params,
               normalizer_params) -> Tuple[our_env.EvalEnvState, PRNGKey]:
    policy_params = jax.tree_map(lambda x: x[0], policy_params)
    (state, _, _, key), _ = jax.lax.scan(
        do_one_step_eval, (state, policy_params, normalizer_params, key), (),
        length=episode_length // action_repeat)
    return state, key

  def do_one_step(carry, unused_target_t):
    state, normalizer_params, policy_params, key = carry
    key, key_sample = jax.random.split(key)
    normalized_obs = obs_normalizer_apply_fn(normalizer_params, state.obs)
    logits = policy_model.apply(policy_params, normalized_obs)
    actions = parametric_action_distribution.sample_no_postprocessing(
        logits, key_sample)
    postprocessed_actions = parametric_action_distribution.postprocess(actions)
    nstate = step_fn(state, postprocessed_actions)
    return (nstate, normalizer_params, policy_params, key), StepData(
        obs=state.obs,
        rewards=state.reward,
        dones=state.done,
        truncation=state.info['truncation'],
        actions=actions,
        logits=logits)

  def generate_unroll(carry, unused_target_t):
    state, normalizer_params, policy_params, key = carry
    (state, _, _, key), data = jax.lax.scan(
        do_one_step, (state, normalizer_params, policy_params, key), (),
        length=unroll_length)
    data = data.replace(
        obs=jnp.concatenate(
            [data.obs, jnp.expand_dims(state.obs, axis=0)]),
        rewards=jnp.concatenate(
            [data.rewards, jnp.expand_dims(state.reward, axis=0)]),
        dones=jnp.concatenate(
            [data.dones, jnp.expand_dims(state.done, axis=0)]),
        truncation=jnp.concatenate(
            [data.truncation, jnp.expand_dims(state.info['truncation'],
                                              axis=0)]))
    return (state, normalizer_params, policy_params, key), data

  def update_model(carry, data):
    optimizer_state, params, key = carry
    key, key_loss = jax.random.split(key)
    loss_grad, metrics = grad_loss(params, data, key_loss)
    loss_grad = jax.lax.pmean(loss_grad, axis_name='i')

    params_update, optimizer_state = optimizer.update(loss_grad,
                                                      optimizer_state,
                                                      params=params)
    params = optax.apply_updates(params, params_update)

    return (optimizer_state, params, key), metrics

  def minimize_epoch(carry, unused_t):
    optimizer_state, params, data, key = carry
    key, key_perm, key_grad = jax.random.split(key, 3)
    permutation = jax.random.permutation(key_perm, data.obs.shape[1])
    def convert_data(data, permutation):
      data = jnp.take(data, permutation, axis=1, mode='clip')
      data = jnp.reshape(
          data, [data.shape[0], num_minibatches, -1] + list(data.shape[2:]))
      data = jnp.swapaxes(data, 0, 1)
      return data
    ndata = jax.tree_map(lambda x: convert_data(x, permutation), data)
    (optimizer_state, params, _), metrics = jax.lax.scan(
        update_model, (optimizer_state, params, key_grad),
        ndata,
        length=num_minibatches)
    return (optimizer_state, params, data, key), metrics

  def run_epoch(carry: Tuple[TrainingState, envs.State], unused_t):
    training_state, state = carry
    key_minimize, key_generate_unroll, new_key = jax.random.split(
        training_state.key, 3)
    (state, _, _, _), data = jax.lax.scan(
        generate_unroll, (state, training_state.normalizer_params,
                          training_state.params['policy'],
                          key_generate_unroll), (),
        length=batch_size * num_minibatches // num_envs)
    # make unroll first
    data = jax.tree_map(lambda x: jnp.swapaxes(x, 0, 1), data)
    data = jax.tree_map(
        lambda x: jnp.reshape(x, [x.shape[0], -1] + list(x.shape[3:])), data)

    # Update normalization params and normalize observations.
    normalizer_params = obs_normalizer_update_fn(
        training_state.normalizer_params, data.obs[:-1])
    data = data.replace(
        obs=obs_normalizer_apply_fn(normalizer_params, data.obs))

    (optimizer_state, params, _, _), metrics = jax.lax.scan(
        minimize_epoch, (training_state.optimizer_state, training_state.params,
                         data, key_minimize), (),
        length=num_update_epochs)

    new_training_state = TrainingState(
        optimizer_state=optimizer_state,
        params=params,
        normalizer_params=normalizer_params,
        key=new_key)
    return (new_training_state, state), metrics

  num_epochs = num_timesteps // (
      batch_size * unroll_length * num_minibatches * action_repeat)

  def _minimize_loop(training_state, state):
    synchro = pmap.is_synchronized(
        (training_state.optimizer_state, training_state.params,
         training_state.normalizer_params),
        axis_name='i')
    (training_state, state), losses = jax.lax.scan(
        run_epoch, (training_state, state), (),
        length=num_epochs // log_frequency)
    losses = jax.tree_map(jnp.mean, losses)
    return (training_state, state), losses, synchro

  minimize_loop = jax.pmap(_minimize_loop, axis_name='i')

  training_state = TrainingState(
      optimizer_state=optimizer_state,
      params=init_agent_params,
      key=jnp.stack(jax.random.split(key, local_devices_to_use)),
      normalizer_params=normalizer_params)
  training_walltime = 0
  eval_walltime = 0
  sps = 0
  eval_sps = 0
  losses = {}
  state = first_state
  metrics = {}

  for it in range(log_frequency + 1):
    logging.info('starting iteration %s %s', it, time.time() - xt)
    t = time.time()

    if process_id == 0:
      eval_state, key_debug = (
          run_eval(eval_first_state, key_debug,
                   training_state.params['policy'],
                   training_state.normalizer_params))
      eval_state.completed_episodes.block_until_ready()
      eval_walltime += time.time() - t
      eval_sps = (episode_length * eval_first_state.core.reward.shape[0] /
                  (time.time() - t))
      avg_episode_length = (
          eval_state.completed_episodes_steps / eval_state.completed_episodes)
      metrics = dict(
          dict({
              f'eval/episode_{name}': value / eval_state.completed_episodes
              for name, value in eval_state.completed_episodes_metrics.items()
          }),
          **dict({
              f'losses/{name}': jnp.mean(value)
              for name, value in losses.items()
          }),
          **dict({
              'eval/completed_episodes': eval_state.completed_episodes,
              'eval/avg_episode_length': avg_episode_length,
              'speed/sps': sps,
              'speed/eval_sps': eval_sps,
              'speed/training_walltime': training_walltime,
              'speed/eval_walltime': eval_walltime,
              'speed/timestamp': training_walltime,
          }))
      logging.info(metrics)
      if progress_fn:
        progress_fn(int(training_state.normalizer_params[0][0]) * action_repeat,
                    metrics)

    if it == log_frequency:
      break

    t = time.time()
    previous_step = training_state.normalizer_params[0][0]
    # optimization
    (training_state,
     state), losses, synchro = minimize_loop(training_state, state)
    assert synchro[0], (it, training_state)
    jax.tree_map(lambda x: x.block_until_ready(), losses)
    sps = ((training_state.normalizer_params[0][0] - previous_step) /
           (time.time() - t)) * action_repeat
    training_walltime += time.time() - t

  # To undo the pmap.
  normalizer_params = jax.tree_map(lambda x: x[0],
                                   training_state.normalizer_params)
  policy_params = jax.tree_map(lambda x: x[0],
                               training_state.params['policy'])
  value_params = jax.tree_map(lambda x: x[0],
                               training_state.params['value'])
  logging.info('total steps: %s', normalizer_params[0] * action_repeat)

  inference, _ = make_params_and_inference_fn(core_env.observation_size,
                                              core_env.action_size,
                                              normalize_observations)
  params = (normalizer_params, 
            policy_params, 
            value_params)
            

  pmap.synchronize_hosts()
  


  return (inference, params, metrics)


def make_params_and_inference_fn(observation_size, action_size,
                                 normalize_observations):
  """Creates params and inference function for the PPO agent."""
  normalizer_params, normalizer_apply_fn = our_normalization.make_data_and_apply_fn(
      observation_size, normalize_observations,
      multitasking=Configuration.multitask_learning,
      task_n=1 + len(Configuration.multitask_ids))
  parametric_action_distribution = distribution.NormalTanhDistribution(
      event_size=action_size)
  policy_model, value_model = our_networks.make_models(
      parametric_action_distribution.param_size,
      observation_size)

  def inference_fn(params, obs, key):
    normalizer_params, policy_params, _ = params
    obs = normalizer_apply_fn(normalizer_params, obs)
    action = parametric_action_distribution.sample(
        policy_model.apply(policy_params, obs), key)
    return action

  def activation_fn(params, obs):
    normalizer_params, policy_params, _ = params
    obs = normalizer_apply_fn(normalizer_params, obs)
    activation = policy_model.apply(policy_params, obs)
    return activation

  def activation_to_action(activation, key):
    action = parametric_action_distribution.sample(activation, key)
    return action

  params = (normalizer_params, 
            policy_model.init(jax.random.PRNGKey(0)), 
            value_model.init(jax.random.PRNGKey(0)))
  return (inference_fn, activation_fn, activation_to_action), params
