# Supplementary material
Source: ML conference proceedings conference paper supplement (https://proceedings.neurips.cc/paper_files/paper/2022/hash/10a6bdcabbd5a3d36b760daa295f63c1-Abstract.html)

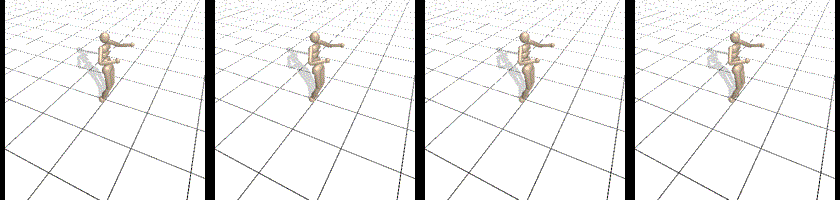

Supplement: Supplementary file 1 [file 10a6bdcabbd5a3d36b760daa295f63c1-Supplemental-Conference.zip › neurips2022/code/robotics_getting_faster.gif]

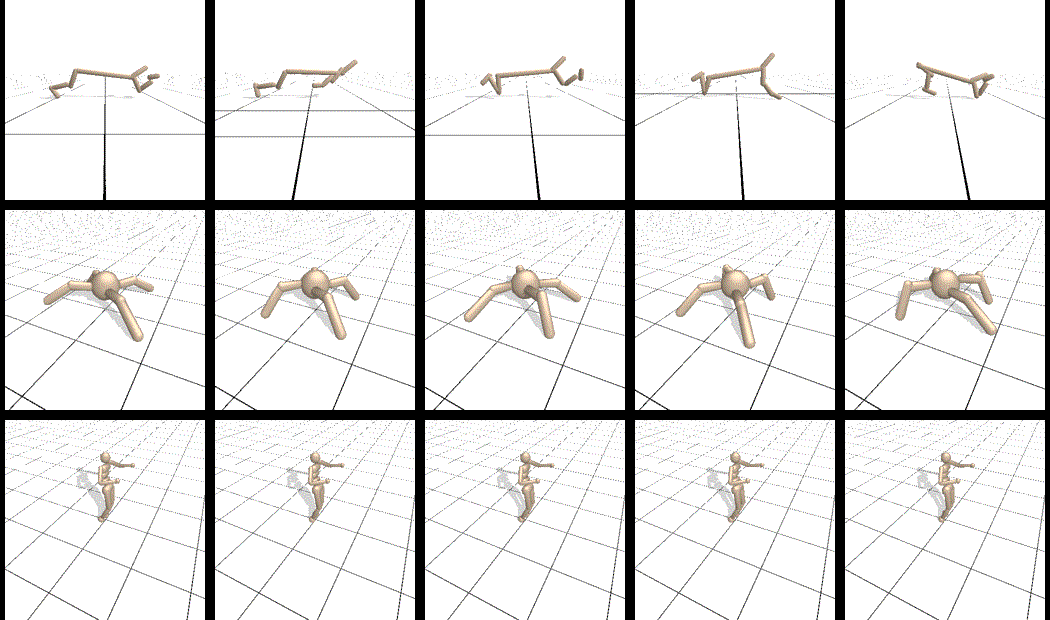

Supplement: Supplementary file 1 [file 10a6bdcabbd5a3d36b760daa295f63c1-Supplemental-Conference.zip › neurips2022/code/robotics_skills.gif]

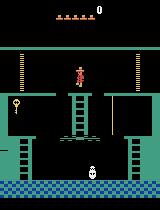

Supplement: Supplementary file 1 [file 10a6bdcabbd5a3d36b760daa295f63c1-Supplemental-Conference.zip › neurips2022/code/montezuma_skill_29_Figure6.gif]

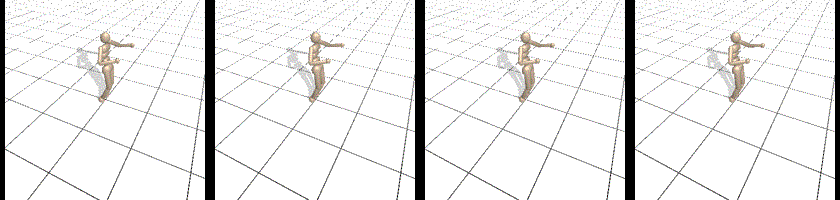

Supplement: Supplementary file 1 [file 10a6bdcabbd5a3d36b760daa295f63c1-Supplemental-Conference.zip › neurips2022/code/robotics_one_leg.gif]

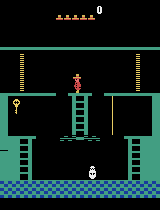

Supplement: Supplementary file 1 [file 10a6bdcabbd5a3d36b760daa295f63c1-Supplemental-Conference.zip › neurips2022/code/montezuma_exploring_other_rooms.gif]
